# Supplementary material for: Effects of high-intensity sprint exercise on neuromuscular function in sprinters: the countermovement jump as a fatigue assessment tool
Source: PeerJ. 2024 May 29;12:e17443. doi: 10.7717/peerj.17443 (PMC11143976; doi:10.7717/peerj.17443)
Supplement: Supplemental Information 1 — The data for each trial for each participant (A–J). [file peerj-12-17443-s001.xlsx]

## Sheet: A
DataTypeVer2.0	Time	Fz	Fz	Fz
NumberOfData		8000	8000	8000
PreTriggerData		0	0	0
SamplingTime[ms]		1	1	1
DataLabel		G1:CMJ	G2:CMJ	G3:CMJ
DataUnit	sec	N	N	N
	0	574.5	586.5	582
	0.001	574.5	587.5	580.5
	0.002	576.5	584	584.5
	0.003	573	585.5	581.5
	0.004	574	584.5	582.5
	0.005	574.5	587.5	583.5
	0.006	573.5	583	581
	0.007	576	582.5	581
	0.008	572	584	582
	0.009	569.5	585.5	577
	0.01	572	589	582.5
	0.011	575.5	587.5	580
	0.012	573.5	587	579
	0.013	574	585	578
	0.014	575.5	584.5	582.5
	0.015	575.5	585.5	582
	0.016	578	585	584.5
	0.017	575.5	582.5	580
	0.018	574.5	584	580.5
	0.019	573.5	587	585.5
	0.02	573.5	584	579.5
	0.021	572.5	586.5	577.5
	0.022	573	586.5	580.5
	0.023	574	584	579.5
	0.024	573.5	587.5	582
	0.025	573	587	581.5
	0.026	575	580.5	581
	0.027	574	586.5	582
	0.028	573	584.5	581
	0.029	574.5	583	582
	0.03	572.5	588	580
	0.031	574.5	584.5	580.5
	0.032	571	582.5	582
	0.033	573	587.5	580
	0.034	573.5	586.5	582.5
	0.035	573.5	588	581
	0.036	572.5	586	581.5
	0.037	570.5	584	581
	0.038	574	587.5	582.5
	0.039	573	590.5	582
	0.04	574.5	587.5	580.5
	0.041	573	585.5	583.5
	0.042	571.5	585.5	579.5
	0.043	572.5	585	580.5
	0.044	572.5	583.5	582.5
	0.045	574.5	586	581
	0.046	572	583.5	578.5
	0.047	573.5	583	581
	0.048	572.5	585.5	578
	0.049	574.5	586	583.5
	0.05	571.5	586	579.5
	0.051	573.5	584	581
	0.052	569.5	584.5	583
	0.053	572	588	579
	0.054	574.5	586	580.5
	0.055	571	584	583.5
	0.056	576	584.5	581
	0.057	569.5	583.5	584
	0.058	572	583.5	580.5
	0.059	572	582	581
	0.06	569.5	582.5	580.5
	0.061	573	583	580
	0.062	571.5	582.5	581
	0.063	571.5	584.5	582
	0.064	572.5	583.5	576.5
	0.065	569.5	581.5	581
	0.066	567	582	580
	0.067	567.5	581	579.5
	0.068	573.5	581	578
	0.069	569.5	582.5	581.5
	0.07	571	581.5	580.5
	0.071	571.5	582.5	579
	0.072	574	581	578.5
	0.073	573.5	581.5	580.5
	0.074	572	580.5	583.5
	0.075	571.5	582	578
	0.076	573	581	580
	0.077	573	580.5	580.5
	0.078	574	579.5	580.5
	0.079	575.5	581	581
	0.08	570	579	580
	0.081	571.5	582	579
	0.082	573.5	581	585
	0.083	571	582.5	577.5
	0.084	574.5	584	581.5
	0.085	568	580.5	578
	0.086	572.5	581	583
	0.087	572	584.5	580
	0.088	571	578.5	580.5
	0.089	570.5	581	580.5
	0.09	570.5	579	581
	0.091	573	580	582.5
	0.092	571	579.5	581
	0.093	571.5	581	580.5
	0.094	573.5	581	579
	0.095	570.5	581	581
	0.096	571	578	580.5
	0.097	572.5	581	581
	0.098	572	580.5	579
	0.099	578	578	584.5
	0.1	574	579	584
	0.101	575	578.5	582.5
	0.102	573.5	584.5	582
	0.103	573.5	577.5	579.5
	0.104	570.5	580.5	585.5
	0.105	570.5	580	583
	0.106	571.5	581.5	580
	0.107	571.5	579	577.5
	0.108	573	582	580.5
	0.109	573	582.5	581.5
	0.11	573	581	581.5
	0.111	573	576.5	584
	0.112	573	581	582.5
	0.113	574.5	580.5	579.5
	0.114	571	579	584.5
	0.115	573.5	578	582.5
	0.116	572.5	581	582.5
	0.117	569.5	581	583
	0.118	572	580.5	581
	0.119	571	580	584
	0.12	572	583.5	580.5
	0.121	574	581	583.5
	0.122	571	582	582.5
	0.123	575	582.5	584.5
	0.124	571.5	582	582.5
	0.125	572.5	579.5	582.5
	0.126	575	580.5	585
	0.127	574.5	583.5	584
	0.128	574.5	577.5	581
	0.129	574	579.5	584.5
	0.13	570.5	580.5	581.5
	0.131	572	579	584
	0.132	574.5	580.5	586
	0.133	574	580.5	584
	0.134	573.5	584.5	580.5
	0.135	573.5	582.5	584
	0.136	571	580	585
	0.137	571	581	582
	0.138	574	582.5	584.5
	0.139	569	579	582.5
	0.14	572.5	581.5	583.5
	0.141	573	580	584
	0.142	571	577.5	586
	0.143	575.5	580.5	584
	0.144	575	583	582.5
	0.145	574.5	581	582.5
	0.146	570.5	577.5	585
	0.147	574	581.5	581
	0.148	571.5	582.5	585.5
	0.149	575	581	584
	0.15	571.5	582	580.5
	0.151	569.5	584	585
	0.152	573	581	585.5
	0.153	574.5	580	586
	0.154	572	581	585.5
	0.155	572.5	583.5	586.5
	0.156	573	578.5	585.5
	0.157	572	582.5	582.5
	0.158	572	577	584.5
	0.159	569.5	581.5	582.5
	0.16	570	581	583.5
	0.161	573.5	580.5	583.5
	0.162	573.5	586	583.5
	0.163	572	581.5	585.5
	0.164	575	582.5	584
	0.165	575	582.5	584.5
	0.166	575	580	585
	0.167	574	583	585.5
	0.168	569	579.5	587
	0.169	574.5	582.5	586.5
	0.17	574	581	587
	0.171	573.5	581.5	581
	0.172	574.5	582	583
	0.173	572.5	582	587
	0.174	572	579	586.5
	0.175	569	581	588
	0.176	576.5	581.5	585
	0.177	574.5	579.5	587.5
	0.178	572.5	582	586
	0.179	574.5	579	585.5
	0.18	575.5	582.5	585.5
	0.181	572.5	582	587.5
	0.182	574	579.5	583.5
	0.183	573.5	581.5	581.5
	0.184	575	579	584.5
	0.185	572	581	587
	0.186	576.5	578.5	588
	0.187	573.5	581.5	585.5
	0.188	574.5	582.5	581
	0.189	574.5	579	585
	0.19	572.5	579.5	581.5
	0.191	573.5	582.5	585
	0.192	573.5	581	580.5
	0.193	573	582.5	583.5
	0.194	574	582.5	581.5
	0.195	576	583.5	585
	0.196	573	582.5	581.5
	0.197	571.5	578.5	587
	0.198	574.5	582.5	583.5
	0.199	571	583	582
	0.2	575.5	577.5	582.5
	0.201	576.5	581.5	582.5
	0.202	571.5	584	584
	0.203	572	583.5	580.5
	0.204	575.5	581.5	580.5
	0.205	572.5	581	581
	0.206	573.5	581	581.5
	0.207	574	581.5	582.5
	0.208	573	581	581.5
	0.209	574.5	581	576.5
	0.21	572.5	580	578.5
	0.211	569	583	581.5
	0.212	572.5	581.5	580
	0.213	571.5	583.5	581
	0.214	574.5	581	580
	0.215	572	582	581
	0.216	571.5	582	580.5
	0.217	572.5	582	576
	0.218	574	579	582
	0.219	570.5	580.5	577.5
	0.22	572.5	581	582.5
	0.221	571.5	581	583.5
	0.222	573.5	580	579.5
	0.223	573.5	582	578
	0.224	574	578.5	580.5
	0.225	574	583.5	579.5
	0.226	573.5	582.5	580
	0.227	572.5	582	578
	0.228	572	583.5	578
	0.229	570.5	581	579
	0.23	572.5	579.5	582.5
	0.231	574	581.5	578.5
	0.232	572	581.5	578
	0.233	570.5	583.5	579.5
	0.234	573	581	578.5
	0.235	576	582	579
	0.236	571.5	581	573
	0.237	575	578	576.5
	0.238	572.5	579.5	578
	0.239	573	580.5	581.5
	0.24	569.5	580.5	577
	0.241	570.5	579.5	578
	0.242	574.5	581.5	578
	0.243	570.5	582.5	576.5
	0.244	569.5	578.5	575
	0.245	574	580	577.5
	0.246	574	580	578.5
	0.247	568.5	578.5	577.5
	0.248	569	580	578
	0.249	572.5	581	579
	0.25	574.5	580	576.5
	0.251	573.5	582	581.5
	0.252	574.5	581	578.5
	0.253	568.5	578.5	580.5
	0.254	570	582.5	577.5
	0.255	571	581.5	577
	0.256	574.5	580	576
	0.257	574	585	577.5
	0.258	570.5	582	580
	0.259	574	579.5	578
	0.26	576	577	578
	0.261	572.5	578.5	577.5
	0.262	569.5	580.5	578.5
	0.263	568.5	582	577.5
	0.264	574.5	580	577
	0.265	573	579	575
	0.266	572.5	580	579
	0.267	571	579	579
	0.268	571	579.5	575.5
	0.269	575	581	575
	0.27	574.5	579	579.5
	0.271	574	580	579
	0.272	576.5	579.5	578.5
	0.273	576	579.5	575.5
	0.274	575	580.5	580.5
	0.275	573.5	579	579
	0.276	571.5	577.5	578.5
	0.277	573	578.5	577.5
	0.278	574	578	584
	0.279	576.5	580.5	577.5
	0.28	570.5	577.5	578
	0.281	573.5	582.5	579.5
	0.282	575	581	577.5
	0.283	571.5	579	579
	0.284	573.5	579.5	579.5
	0.285	573	579.5	579
	0.286	574.5	581	581.5
	0.287	576	577.5	578.5
	0.288	576	584.5	581
	0.289	575	581	578
	0.29	578.5	582	578.5
	0.291	573.5	578.5	575.5
	0.292	575	581.5	580
	0.293	574.5	579.5	579.5
	0.294	571.5	578.5	579
	0.295	575.5	578	579.5
	0.296	578	580.5	581
	0.297	575	581	582
	0.298	573.5	579	582
	0.299	574	578.5	579
	0.3	571.5	578.5	580.5
	0.301	570.5	582.5	584.5
	0.302	574.5	580	582
	0.303	573.5	581.5	580.5
	0.304	572.5	579.5	581.5
	0.305	572.5	580.5	580.5
	0.306	573	581	581
	0.307	574.5	580.5	585
	0.308	574.5	581	582
	0.309	573.5	578.5	581
	0.31	575	579.5	583.5
	0.311	574.5	581	584
	0.312	572.5	581	582
	0.313	572	582.5	584.5
	0.314	574.5	580	581.5
	0.315	578	579	582.5
	0.316	573	581.5	584
	0.317	574.5	583.5	581
	0.318	575	578.5	582
	0.319	575	581.5	584
	0.32	574.5	580.5	581
	0.321	572	579	584
	0.322	574.5	578.5	586.5
	0.323	574.5	579	580.5
	0.324	573.5	579	581
	0.325	576	574.5	581.5
	0.326	575.5	579	585.5
	0.327	574.5	581	584
	0.328	572	582	581.5
	0.329	576.5	580	581.5
	0.33	574.5	578.5	586.5
	0.331	576	578.5	581
	0.332	574.5	580	585
	0.333	574.5	580	583.5
	0.334	576	579.5	582.5
	0.335	570	577	585.5
	0.336	574.5	577	582.5
	0.337	572	578	581
	0.338	574.5	578	585.5
	0.339	574.5	581	584.5
	0.34	576.5	579	584
	0.341	574.5	578.5	582
	0.342	572.5	580	584.5
	0.343	574.5	577.5	582.5
	0.344	569	578.5	583
	0.345	574.5	583.5	580
	0.346	573.5	579	583.5
	0.347	573	581	582
	0.348	573	579.5	587.5
	0.349	572.5	580	584.5
	0.35	572.5	580	581.5
	0.351	573.5	581.5	582
	0.352	575.5	580	582
	0.353	568.5	581	581
	0.354	573.5	580.5	581
	0.355	574	580	585.5
	0.356	573.5	581.5	582.5
	0.357	572	581	582
	0.358	575.5	580.5	582.5
	0.359	574.5	581	585.5
	0.36	573.5	581	583.5
	0.361	569.5	582.5	585
	0.362	571	581	581.5
	0.363	571	581.5	584.5
	0.364	569	578	587.5
	0.365	572.5	581	580
	0.366	572	581	582.5
	0.367	572	580	583
	0.368	571.5	578	577.5
	0.369	573.5	580.5	581.5
	0.37	568	580	581.5
	0.371	568.5	582.5	583
	0.372	571.5	584	582.5
	0.373	571	581	581.5
	0.374	573.5	584.5	582
	0.375	569.5	580	584
	0.376	571.5	584.5	579.5
	0.377	570.5	581	578.5
	0.378	571	582	581.5
	0.379	571.5	581	582
	0.38	568	582.5	581.5
	0.381	570	581	582.5
	0.382	569	582.5	580.5
	0.383	570.5	584.5	582.5
	0.384	573	581.5	582.5
	0.385	569.5	582.5	581
	0.386	569.5	584	580
	0.387	570.5	583.5	580
	0.388	568	579.5	581
	0.389	569.5	581.5	578
	0.39	572	582	581
	0.391	569	578.5	581
	0.392	569.5	580	581.5
	0.393	569.5	581	584
	0.394	569	583.5	582.5
	0.395	567.5	576.5	584
	0.396	569	581	580.5
	0.397	570	584	584
	0.398	571.5	583.5	576
	0.399	568	583	581
	0.4	565.5	582	581
	0.401	569.5	582	581
	0.402	568	585	581.5
	0.403	570	579	581
	0.404	571.5	581.5	585
	0.405	571	582.5	580
	0.406	570	578	581.5
	0.407	569	581	581.5
	0.408	568.5	575	582.5
	0.409	567.5	581	578.5
	0.41	565	581	580.5
	0.411	570	580	584
	0.412	569.5	582.5	577.5
	0.413	567	584.5	583
	0.414	567	583	581.5
	0.415	573.5	581	581
	0.416	569	581.5	581.5
	0.417	569	580	582.5
	0.418	571	581.5	581
	0.419	569.5	582	578
	0.42	570.5	581	582.5
	0.421	567.5	580	581.5
	0.422	566.5	585.5	579
	0.423	569	580	578.5
	0.424	568	579.5	577
	0.425	570	583.5	580.5
	0.426	570	583	580
	0.427	571.5	582	578.5
	0.428	569	582	581.5
	0.429	568	582.5	580.5
	0.43	570.5	584.5	580
	0.431	571.5	583.5	583
	0.432	571	583.5	580
	0.433	571	584	581
	0.434	569	584.5	581.5
	0.435	572.5	581	581.5
	0.436	569.5	582.5	587
	0.437	571.5	582.5	582
	0.438	567.5	583.5	583.5
	0.439	570.5	584.5	584
	0.44	572.5	584.5	581
	0.441	569	583.5	579.5
	0.442	571.5	586.5	581
	0.443	567.5	584.5	586
	0.444	576.5	582	581
	0.445	569.5	583	580
	0.446	573.5	585.5	582.5
	0.447	571.5	583	580.5
	0.448	570.5	580	581
	0.449	570.5	585.5	581.5
	0.45	572.5	584	581
	0.451	573	582.5	585.5
	0.452	565.5	583.5	582
	0.453	574.5	582.5	579.5
	0.454	572.5	586	579
	0.455	573.5	581.5	581.5
	0.456	571.5	582.5	581.5
	0.457	574.5	582.5	581
	0.458	569.5	586.5	582.5
	0.459	570.5	584	582
	0.46	572	582.5	580
	0.461	578.5	585.5	583.5
	0.462	572.5	581	582.5
	0.463	569	581	582.5
	0.464	575	581	581
	0.465	574.5	581.5	581
	0.466	573	584	581
	0.467	575	581	585.5
	0.468	574.5	583.5	583.5
	0.469	571.5	582.5	581
	0.47	572.5	581	583.5
	0.471	574.5	582.5	584
	0.472	574.5	579.5	581
	0.473	577	581	582
	0.474	574	581.5	579
	0.475	572	580.5	584
	0.476	574.5	582	581
	0.477	578.5	582	581
	0.478	576	582	583
	0.479	577.5	581	581.5
	0.48	578.5	579	581.5
	0.481	578.5	582.5	580.5
	0.482	575.5	579.5	582
	0.483	574.5	581.5	581
	0.484	576.5	581	582.5
	0.485	575.5	582	584.5
	0.486	574.5	581	584.5
	0.487	576	579	583
	0.488	571.5	580.5	582
	0.489	573.5	581.5	581
	0.49	575	581	581
	0.491	575	580.5	581
	0.492	578.5	579.5	582.5
	0.493	577	581.5	585
	0.494	574.5	578	583.5
	0.495	572	580	582
	0.496	574.5	585.5	583
	0.497	575.5	584	582.5
	0.498	575.5	581.5	580.5
	0.499	574.5	584.5	582.5
	0.5	576.5	582.5	585
	0.501	575	580.5	584
	0.502	574.5	580.5	584
	0.503	578	580.5	580
	0.504	578	581	580
	0.505	575	583	583.5
	0.506	574.5	582.5	577.5
	0.507	576.5	581	583
	0.508	574	581.5	579
	0.509	574.5	582.5	582
	0.51	573.5	582.5	585.5
	0.511	575.5	583.5	580
	0.512	572.5	578.5	581.5
	0.513	576	580	581
	0.514	576.5	581.5	582
	0.515	570.5	582.5	577
	0.516	574.5	582.5	581
	0.517	576.5	584.5	581
	0.518	571.5	579	583.5
	0.519	576	581	581
	0.52	574	581	583.5
	0.521	571.5	579	580.5
	0.522	574.5	582	580.5
	0.523	574.5	584	585.5
	0.524	576.5	581	580
	0.525	574.5	581	581.5
	0.526	574.5	579.5	582
	0.527	573.5	580.5	584
	0.528	573.5	579	578
	0.529	574.5	580	584
	0.53	574.5	581	581.5
	0.531	573.5	580.5	586
	0.532	573.5	581	582.5
	0.533	574.5	581	584.5
	0.534	574.5	582.5	585.5
	0.535	570.5	579	583.5
	0.536	574	579.5	582.5
	0.537	574.5	586.5	584
	0.538	572.5	577.5	585.5
	0.539	573.5	581	584.5
	0.54	574	581	581.5
	0.541	572	584	581
	0.542	572.5	577.5	581
	0.543	571.5	580	581
	0.544	573	580.5	582
	0.545	570.5	582.5	580.5
	0.546	571.5	582	582
	0.547	574.5	582	582
	0.548	568	584.5	581.5
	0.549	575	580.5	582
	0.55	574.5	581.5	584
	0.551	575	581.5	577
	0.552	571.5	582.5	582.5
	0.553	573	578	581
	0.554	571.5	582	580.5
	0.555	571	580	582.5
	0.556	571	579	581
	0.557	572	578.5	580.5
	0.558	574.5	581	586
	0.559	574	586	580.5
	0.56	573	578.5	582.5
	0.561	573.5	580	582.5
	0.562	571.5	578.5	581.5
	0.563	573.5	581	583
	0.564	573	580.5	582.5
	0.565	571.5	581.5	583
	0.566	574	578	583.5
	0.567	572.5	581	581.5
	0.568	571.5	582.5	581
	0.569	574	583.5	584
	0.57	571.5	579	582
	0.571	573	581	584
	0.572	573.5	582.5	581
	0.573	570	580.5	581
	0.574	569	579.5	581.5
	0.575	567.5	578	582.5
	0.576	570.5	584.5	580.5
	0.577	572	578.5	580
	0.578	573.5	581	582.5
	0.579	574	578.5	583.5
	0.58	573	581	580.5
	0.581	575.5	581	580
	0.582	570	581	580
	0.583	574.5	581	583
	0.584	571.5	581	579.5
	0.585	573	580	581
	0.586	570	577.5	582
	0.587	568.5	580.5	579
	0.588	572	581	580
	0.589	567.5	581	581
	0.59	570	585	582.5
	0.591	571.5	578.5	583
	0.592	572	582	581
	0.593	569.5	578	580.5
	0.594	573.5	581	580.5
	0.595	568.5	580	581
	0.596	569.5	582.5	579
	0.597	571	581	582.5
	0.598	567	583.5	583
	0.599	568.5	579.5	579.5
	0.6	567.5	582	582.5
	0.601	570.5	581	581.5
	0.602	573.5	579.5	581.5
	0.603	569	579	579
	0.604	572	582.5	581.5
	0.605	573.5	584	578.5
	0.606	572	581.5	581.5
	0.607	574.5	577.5	583
	0.608	569	579.5	584
	0.609	574.5	582.5	583.5
	0.61	574.5	581	580.5
	0.611	570	580	580
	0.612	574	578.5	581
	0.613	572.5	578.5	581
	0.614	569.5	577.5	581
	0.615	571	578	582
	0.616	571.5	582	578.5
	0.617	573	579	581
	0.618	570	580.5	582
	0.619	574	579	585
	0.62	572	581	580
	0.621	573.5	578	582.5
	0.622	571	584	581
	0.623	573.5	581	581
	0.624	573	580	583.5
	0.625	572.5	579.5	580
	0.626	570	577	575
	0.627	575	576	580
	0.628	573.5	580	581.5
	0.629	571.5	581	581
	0.63	576	580.5	581
	0.631	574	579	583
	0.632	574.5	580.5	579
	0.633	574.5	581	581
	0.634	573.5	580	580.5
	0.635	572	581	580.5
	0.636	570.5	586	580
	0.637	576.5	581.5	579.5
	0.638	573.5	579.5	581.5
	0.639	574	582.5	579
	0.64	573.5	581	581
	0.641	576	582.5	581
	0.642	575	580.5	581
	0.643	574.5	580.5	579.5
	0.644	573	581	581
	0.645	571.5	581	578
	0.646	573	583.5	581
	0.647	573	580	581
	0.648	575	582.5	580
	0.649	573.5	581.5	580
	0.65	572.5	583	581.5
	0.651	571.5	581.5	582.5
	0.652	572.5	581.5	581
	0.653	576	581.5	581
	0.654	574	582	582
	0.655	571	581.5	581
	0.656	569.5	585.5	581
	0.657	575	587	582
	0.658	572	584.5	578.5
	0.659	574.5	582.5	582.5
	0.66	573.5	582.5	579.5
	0.661	574.5	583.5	577
	0.662	576	582.5	578
	0.663	572.5	582.5	580
	0.664	573	584	580.5
	0.665	574.5	580.5	581.5
	0.666	572.5	582.5	581
	0.667	574	578	579
	0.668	574	582	581.5
	0.669	576.5	582.5	581
	0.67	569.5	582.5	581
	0.671	572	582.5	577.5
	0.672	571	582	581.5
	0.673	573.5	582.5	581.5
	0.674	574.5	580	581
	0.675	574.5	583.5	580
	0.676	571.5	582.5	576
	0.677	572	581.5	579
	0.678	572.5	583.5	578
	0.679	574.5	584.5	580
	0.68	573	584	580.5
	0.681	573	581	578
	0.682	573	580.5	579
	0.683	570.5	580	581
	0.684	576	578	580
	0.685	572	580.5	581
	0.686	573	581	575
	0.687	570	581	577
	0.688	572.5	577	582.5
	0.689	576	584	581
	0.69	572.5	580	579
	0.691	573.5	580.5	581
	0.692	572	583.5	579.5
	0.693	572	580.5	581.5
	0.694	575	582	580
	0.695	576.5	579	575.5
	0.696	570.5	579.5	581
	0.697	572	581	578.5
	0.698	572	581	579
	0.699	571.5	581	584.5
	0.7	573	581	581
	0.701	574.5	581.5	580
	0.702	569.5	581	578
	0.703	574.5	581	580.5
	0.704	569	582	582.5
	0.705	571	581.5	582.5
	0.706	572.5	581	576
	0.707	574	581	579
	0.708	573	580.5	580
	0.709	572.5	582	576.5
	0.71	578	581	580
	0.711	571	579.5	574.5
	0.712	574	579	581
	0.713	575	579.5	576
	0.714	577	582.5	580
	0.715	573	581.5	580
	0.716	571	579	579
	0.717	574	585.5	577
	0.718	570.5	581	576
	0.719	572	580.5	578.5
	0.72	567.5	583.5	575
	0.721	571.5	583.5	579
	0.722	575	581.5	574.5
	0.723	570	581	575.5
	0.724	572.5	582.5	576.5
	0.725	570.5	582	575
	0.726	577.5	583	575.5
	0.727	570.5	581.5	577
	0.728	569	586.5	575
	0.729	570.5	581	575.5
	0.73	572.5	584.5	577.5
	0.731	573	582	577
	0.732	571	582.5	576.5
	0.733	569	585.5	578
	0.734	571	583.5	577
	0.735	573.5	582.5	573.5
	0.736	571	582.5	576.5
	0.737	573.5	585	574
	0.738	571	582	574
	0.739	574.5	583.5	575
	0.74	569.5	584.5	575
	0.741	569.5	579	575
	0.742	572.5	582.5	577
	0.743	573	584	575.5
	0.744	572	581.5	575
	0.745	570.5	581	575
	0.746	571.5	582	578.5
	0.747	572	584.5	576.5
	0.748	574.5	583.5	573
	0.749	571.5	584.5	577.5
	0.75	569	582	581
	0.751	573.5	585	577
	0.752	569	583.5	579
	0.753	570	585.5	574
	0.754	571.5	582.5	578
	0.755	570	578.5	579
	0.756	572.5	582.5	579
	0.757	571	584	576.5
	0.758	575.5	576	580.5
	0.759	572	582	581
	0.76	570.5	581	580
	0.761	571.5	580	578.5
	0.762	572	579.5	580
	0.763	571.5	582.5	579.5
	0.764	574.5	580.5	577
	0.765	572.5	579	582.5
	0.766	572	580.5	581
	0.767	573	581.5	579.5
	0.768	572	580.5	581.5
	0.769	572	581	581.5
	0.77	571.5	579	582.5
	0.771	573	580	580.5
	0.772	572.5	582.5	581
	0.773	572	577.5	582
	0.774	573	579	581.5
	0.775	572.5	582	581.5
	0.776	570	579	585
	0.777	571.5	577.5	584
	0.778	571	579.5	586
	0.779	573	576	585
	0.78	574.5	575	584.5
	0.781	571	579	584.5
	0.782	573.5	576.5	584.5
	0.783	573.5	577.5	585.5
	0.784	571.5	579	584
	0.785	573	580.5	582.5
	0.786	573.5	579	587
	0.787	573	580	585
	0.788	569.5	579	587.5
	0.789	573	577.5	588
	0.79	574.5	579	588
	0.791	570.5	579	584
	0.792	575	580.5	586
	0.793	573	576	586
	0.794	573	577	588
	0.795	576	581	588.5
	0.796	571.5	578.5	586.5
	0.797	570.5	578.5	590.5
	0.798	573.5	578.5	586.5
	0.799	574.5	575	585.5
	0.8	574	581	588.5
	0.801	574.5	579.5	586.5
	0.802	575.5	578.5	592
	0.803	574	577	589.5
	0.804	574	581	588.5
	0.805	570.5	578.5	587
	0.806	576.5	576.5	590
	0.807	571	578	588
	0.808	575.5	578.5	589
	0.809	571.5	582	587.5
	0.81	573	580	585.5
	0.811	571.5	577	592
	0.812	572.5	581.5	591.5
	0.813	574	581	589.5
	0.814	575	580	588
	0.815	573	580.5	590.5
	0.816	573.5	577.5	588
	0.817	575	581	590
	0.818	574.5	581	588
	0.819	574.5	580	590
	0.82	578.5	579	590.5
	0.821	575	577	587
	0.822	574.5	578.5	587
	0.823	573	580.5	588.5
	0.824	575	579	588
	0.825	574	584	589.5
	0.826	575	579.5	588
	0.827	570	579	587
	0.828	574.5	582.5	588.5
	0.829	574	580.5	588
	0.83	573.5	582.5	588
	0.831	575	577.5	587
	0.832	576.5	581	588
	0.833	571	580	586.5
	0.834	571.5	578	590
	0.835	574.5	581.5	589
	0.836	572.5	580.5	588
	0.837	572.5	580	590
	0.838	574	581	590
	0.839	576.5	579.5	591
	0.84	574.5	579	586.5
	0.841	576	580.5	588.5
	0.842	580	581	587
	0.843	575.5	576.5	587.5
	0.844	576.5	582	585
	0.845	574	580	588
	0.846	575	579.5	589
	0.847	575	581	588.5
	0.848	572.5	582	584.5
	0.849	574	580	585.5
	0.85	572.5	579.5	586
	0.851	574.5	581	586.5
	0.852	578.5	580.5	585.5
	0.853	571	581	584
	0.854	573	575	582
	0.855	578	578	590.5
	0.856	573	581	585
	0.857	571.5	582.5	587.5
	0.858	578.5	580	583.5
	0.859	572.5	581	582.5
	0.86	574	581	586
	0.861	573.5	581	586.5
	0.862	571.5	581.5	585
	0.863	570.5	581.5	582.5
	0.864	573	577.5	588
	0.865	574.5	579.5	584.5
	0.866	573.5	581	582.5
	0.867	573	581.5	583
	0.868	572	581.5	585.5
	0.869	573.5	581.5	584
	0.87	567.5	580	587
	0.871	574.5	581	582.5
	0.872	571.5	577.5	583
	0.873	573.5	581.5	584.5
	0.874	574.5	582	585.5
	0.875	572.5	579	579
	0.876	573.5	581	584
	0.877	572	584	581
	0.878	571.5	585	586.5
	0.879	571.5	582.5	586
	0.88	573	581	582.5
	0.881	570	581	582
	0.882	575	580	580.5
	0.883	571.5	581	588.5
	0.884	572.5	581.5	582.5
	0.885	572.5	579	583
	0.886	575	582.5	582.5
	0.887	572.5	581	581
	0.888	574.5	582	582.5
	0.889	568.5	580	580.5
	0.89	572.5	578.5	581
	0.891	571	582	582.5
	0.892	569	581	584.5
	0.893	571	578.5	582
	0.894	571.5	580.5	581
	0.895	569.5	580.5	582.5
	0.896	573	582	584.5
	0.897	572	582.5	581
	0.898	569	582	581.5
	0.899	567.5	581.5	577
	0.9	570.5	583	580.5
	0.901	568.5	581.5	581.5
	0.902	570	584.5	582.5
	0.903	570.5	585.5	581
	0.904	568	583	580.5
	0.905	569.5	582	580.5
	0.906	571	585.5	581
	0.907	571.5	581	583.5
	0.908	572.5	582.5	581
	0.909	567.5	581.5	579.5
	0.91	566	582.5	581
	0.911	569	584	581
	0.912	570.5	582	581.5
	0.913	571.5	581.5	578.5
	0.914	572.5	589.5	578.5
	0.915	569	584	581
	0.916	573	584.5	579.5
	0.917	571.5	584	581
	0.918	569	581.5	578.5
	0.919	571	582	581
	0.92	567.5	581.5	581
	0.921	570	586.5	580.5
	0.922	571.5	582.5	581
	0.923	570.5	581.5	579.5
	0.924	568.5	584.5	581
	0.925	566.5	584.5	582
	0.926	570.5	584.5	581
	0.927	571.5	585	581
	0.928	568.5	582.5	580.5
	0.929	570.5	583.5	579.5
	0.93	568.5	586.5	580.5
	0.931	570	585.5	578.5
	0.932	570.5	585.5	580.5
	0.933	570	581.5	578.5
	0.934	569	585	579.5
	0.935	571.5	583.5	581
	0.936	568.5	584	584
	0.937	567.5	581	582.5
	0.938	568.5	581.5	577.5
	0.939	569	582.5	582
	0.94	566	581	583.5
	0.941	567.5	585	579.5
	0.942	573	581	581.5
	0.943	568.5	582	581
	0.944	570.5	584.5	580.5
	0.945	571.5	582	581
	0.946	568.5	583	583
	0.947	570.5	581	583.5
	0.948	569.5	585.5	582.5
	0.949	567.5	581.5	580.5
	0.95	574	583.5	581
	0.951	572	582	586
	0.952	569.5	580.5	586
	0.953	569	584	580
	0.954	571	584.5	583.5
	0.955	571.5	582	580
	0.956	573.5	581	582.5
	0.957	574	582	582.5
	0.958	571.5	581	585
	0.959	574.5	581	585
	0.96	569.5	582.5	585.5
	0.961	571.5	581	583.5
	0.962	575	584	584.5
	0.963	575	582.5	586.5
	0.964	571	580.5	583.5
	0.965	571	584	588
	0.966	573.5	582	583.5
	0.967	571.5	581	584
	0.968	571.5	581.5	584.5
	0.969	571	582	584.5
	0.97	570	582.5	582.5
	0.971	573.5	581	584
	0.972	573.5	582.5	583
	0.973	574.5	581	585
	0.974	570	582	583.5
	0.975	571.5	579	586.5
	0.976	575	582.5	582.5
	0.977	573	582	584.5
	0.978	571.5	582	582.5
	0.979	574	580.5	587
	0.98	573.5	581	587
	0.981	573	579.5	584.5
	0.982	571	578	585.5
	0.983	574	581.5	581
	0.984	574.5	580.5	586
	0.985	574.5	581.5	582.5
	0.986	574	581	586.5
	0.987	576.5	578.5	583.5
	0.988	575.5	579	584.5
	0.989	573.5	580	585.5
	0.99	574	578.5	582.5
	0.991	575	581	586.5
	0.992	575	580	581.5
	0.993	573.5	577	581
	0.994	573.5	580	585
	0.995	571.5	579.5	586
	0.996	574.5	581	582.5
	0.997	576	578	588
	0.998	576.5	578	584
	0.999	573.5	581.5	581.5
	1	574.5	579	581.5
	1.001	573.5	581.5	584.5
	1.002	575.5	582	585
	1.003	573	580.5	581
	1.004	573	582	585.5
	1.005	576	579.5	586
	1.006	575	578.5	587.5
	1.007	575.5	582.5	582
	1.008	575.5	580	581.5
	1.009	575.5	579	582.5
	1.01	574.5	579.5	584
	1.011	572	581	583
	1.012	575	581	580
	1.013	575	579	582.5
	1.014	573.5	581	584.5
	1.015	575	581	581.5
	1.016	574	577.5	585.5
	1.017	577	578	582
	1.018	574.5	579	578.5
	1.019	576.5	579	582.5
	1.02	571	578	581
	1.021	573	580.5	582
	1.022	575	581	584.5
	1.023	576	583	582.5
	1.024	574.5	581.5	580
	1.025	572	581	580
	1.026	576.5	580.5	585.5
	1.027	574.5	579	580
	1.028	576.5	584.5	585
	1.029	575.5	578.5	581.5
	1.03	570	582	580
	1.031	575	580.5	582
	1.032	573.5	582.5	579
	1.033	575.5	580.5	582.5
	1.034	574	581	583
	1.035	577.5	580	582.5
	1.036	573	581	581
	1.037	575.5	579	582.5
	1.038	570	580	584.5
	1.039	570	581	580.5
	1.04	576	580.5	584.5
	1.041	575.5	582.5	579
	1.042	574	584.5	582
	1.043	575	580	584
	1.044	574.5	579.5	584.5
	1.045	571.5	581.5	582.5
	1.046	573.5	583.5	581
	1.047	574.5	581	582
	1.048	573	581.5	581.5
	1.049	572.5	585	582.5
	1.05	574.5	582.5	582.5
	1.051	575	579.5	584.5
	1.052	575	581	578.5
	1.053	574	581.5	581
	1.054	573	581	582.5
	1.055	574	582	582.5
	1.056	574.5	583.5	581.5
	1.057	572	581.5	583
	1.058	572.5	579.5	581
	1.059	573.5	581	585
	1.06	574.5	583	581.5
	1.061	574.5	582	581
	1.062	575	581	581
	1.063	574.5	582	581
	1.064	576	584.5	582.5
	1.065	576	582	581
	1.066	575	579	581.5
	1.067	574	580.5	586.5
	1.068	570.5	580.5	582
	1.069	573	581	582
	1.07	573	581	580
	1.071	576	579	582.5
	1.072	573	581	579
	1.073	573.5	581.5	584
	1.074	575	581	580.5
	1.075	572.5	582.5	580.5
	1.076	574	581	580.5
	1.077	577	582	580.5
	1.078	571.5	583.5	580
	1.079	574	582.5	579
	1.08	574.5	586	583.5
	1.081	570.5	579.5	579.5
	1.082	572	578.5	580
	1.083	569	582	581.5
	1.084	575	579.5	580
	1.085	573	582.5	579.5
	1.086	570.5	577.5	582.5
	1.087	576	579.5	580.5
	1.088	573.5	581.5	581.5
	1.089	574.5	579	579.5
	1.09	572	582	582.5
	1.091	571.5	578	582.5
	1.092	574.5	580	583
	1.093	572	582.5	581.5
	1.094	570	581	582
	1.095	574	582	581
	1.096	572	582.5	582.5
	1.097	573.5	576.5	579
	1.098	574	579	577
	1.099	571.5	581	578
	1.1	570.5	580	580
	1.101	572.5	581	581
	1.102	572	580.5	584
	1.103	571	581	580.5
	1.104	572.5	579	582.5
	1.105	575	582.5	579
	1.106	567.5	574.5	582
	1.107	569.5	580.5	582
	1.108	571.5	582.5	581
	1.109	574	581	580
	1.11	569.5	582	580
	1.111	570	580	580.5
	1.112	571	579	579
	1.113	571.5	581	583
	1.114	571.5	578.5	580.5
	1.115	569.5	579.5	581
	1.116	570	582.5	582.5
	1.117	574.5	577.5	577
	1.118	574	579.5	580.5
	1.119	571.5	578	583.5
	1.12	569.5	578	580.5
	1.121	570.5	582.5	581.5
	1.122	572.5	579.5	579.5
	1.123	574	577	581
	1.124	569	579.5	581
	1.125	572.5	581	582.5
	1.126	570	581	581.5
	1.127	575.5	580	584.5
	1.128	570.5	575	582.5
	1.129	573.5	577	582
	1.13	568.5	581	581.5
	1.131	568.5	579	582
	1.132	571	579	583.5
	1.133	573	580.5	584
	1.134	571.5	581	581
	1.135	567	581.5	581.5
	1.136	568.5	580.5	581
	1.137	572	581.5	583.5
	1.138	571	580	584.5
	1.139	569.5	579	585
	1.14	574	579	581
	1.141	574.5	582	581
	1.142	569	581.5	581.5
	1.143	571	581.5	580.5
	1.144	570.5	581.5	580
	1.145	575	581	582
	1.146	568.5	581.5	582
	1.147	575	580.5	582.5
	1.148	574.5	580	586.5
	1.149	572.5	582.5	585
	1.15	572	579.5	584
	1.151	570.5	581	584
	1.152	573.5	582.5	581.5
	1.153	569.5	585.5	583.5
	1.154	575	582.5	582.5
	1.155	571.5	581.5	584.5
	1.156	573	582.5	584.5
	1.157	572.5	581	584.5
	1.158	574.5	585	583
	1.159	572	581.5	586
	1.16	574.5	580	584
	1.161	574	582.5	582.5
	1.162	574.5	583	584
	1.163	574	584.5	585.5
	1.164	576.5	581	585
	1.165	570	581.5	581
	1.166	570	580.5	583
	1.167	572	580	584
	1.168	575	581	585
	1.169	574.5	580	582
	1.17	573	581	586
	1.171	572.5	581.5	584.5
	1.172	571.5	582	582.5
	1.173	573.5	581	584.5
	1.174	573	583.5	585
	1.175	572.5	579.5	583
	1.176	572	581	581.5
	1.177	574	582	582.5
	1.178	575.5	580.5	583.5
	1.179	571.5	580	583.5
	1.18	576	581	585.5
	1.181	574.5	584	583
	1.182	578	581	588.5
	1.183	574.5	581	583.5
	1.184	572	583	587
	1.185	573	580.5	587.5
	1.186	574	582	585
	1.187	574.5	581	583.5
	1.188	575	580	584
	1.189	573	587	585.5
	1.19	574.5	578.5	585.5
	1.191	574.5	582	588
	1.192	571	582	583.5
	1.193	573.5	581	585.5
	1.194	573.5	581	585.5
	1.195	572.5	582.5	581
	1.196	574	582	582.5
	1.197	575	582.5	584.5
	1.198	575	582	582
	1.199	577	583	584
	1.2	575	582.5	587
	1.201	572.5	582.5	583.5
	1.202	573	581	583.5
	1.203	570	584	584
	1.204	573	583	582.5
	1.205	571	584.5	582.5
	1.206	573	580.5	582
	1.207	573.5	581	579.5
	1.208	573.5	584.5	582.5
	1.209	571.5	582.5	581.5
	1.21	574.5	583.5	582
	1.211	573	581	581
	1.212	573.5	582	582.5
	1.213	574.5	580	581
	1.214	573.5	580.5	580.5
	1.215	574	580.5	582.5
	1.216	573	580.5	584.5
	1.217	571.5	581	581.5
	1.218	575	580.5	582.5
	1.219	575	581	581.5
	1.22	574	581	582.5
	1.221	574.5	578.5	581.5
	1.222	577	584	582
	1.223	573	579	582.5
	1.224	572	583	582
	1.225	575.5	580.5	581.5
	1.226	570.5	581.5	581
	1.227	572.5	581	585.5
	1.228	573	580.5	581
	1.229	573	581	581.5
	1.23	571	583.5	584.5
	1.231	574.5	579	582.5
	1.232	573	582	581.5
	1.233	573	581	585.5
	1.234	571	580.5	581.5
	1.235	570.5	581.5	584
	1.236	571.5	582.5	583
	1.237	572	579.5	583.5
	1.238	570	585	583.5
	1.239	570	580.5	584.5
	1.24	571.5	584	583
	1.241	574.5	581.5	585.5
	1.242	572	585	582
	1.243	571	582	583.5
	1.244	571.5	581	582.5
	1.245	575.5	579	584
	1.246	569	583.5	585.5
	1.247	570	582.5	581
	1.248	571	582.5	582.5
	1.249	574.5	585	582.5
	1.25	572.5	581	582.5
	1.251	571	582	587
	1.252	574	581	583.5
	1.253	570	585	584.5
	1.254	567.5	586	582.5
	1.255	569.5	584.5	585
	1.256	572	585.5	583.5
	1.257	572.5	586.5	581
	1.258	574	584.5	584.5
	1.259	574.5	586.5	584.5
	1.26	573.5	584.5	582
	1.261	571.5	585.5	581.5
	1.262	574	581.5	584
	1.263	573	582.5	585.5
	1.264	574	586.5	581
	1.265	572	585	582.5
	1.266	571	586.5	584
	1.267	575	586.5	586.5
	1.268	570.5	583.5	585.5
	1.269	573.5	586.5	586
	1.27	570.5	583.5	581
	1.271	574	585	583
	1.272	571.5	583.5	587.5
	1.273	574.5	585	582
	1.274	572.5	582.5	582.5
	1.275	575.5	582.5	582
	1.276	570.5	582	580.5
	1.277	570.5	580	582.5
	1.278	574.5	585	583.5
	1.279	571	582	581.5
	1.28	575.5	582.5	580
	1.281	573	581.5	581
	1.282	572	584.5	581
	1.283	569.5	584	585.5
	1.284	573	582.5	582.5
	1.285	574.5	580	585.5
	1.286	570.5	580.5	581
	1.287	572.5	580.5	581
	1.288	574	584.5	576.5
	1.289	573.5	581	581.5
	1.29	574	577.5	581
	1.291	570.5	581	580
	1.292	573.5	578.5	578.5
	1.293	573	580	581
	1.294	570.5	581	580.5
	1.295	577.5	581	580.5
	1.296	573	586.5	579
	1.297	572	582.5	579
	1.298	574	579.5	581
	1.299	572.5	579	577.5
	1.3	572.5	580.5	576.5
	1.301	576	579	580
	1.302	572	581	580.5
	1.303	574	577.5	579.5
	1.304	574.5	578.5	580.5
	1.305	574.5	581	576
	1.306	574.5	579	574
	1.307	570.5	580.5	576.5
	1.308	574.5	580	577
	1.309	575	578	577.5
	1.31	573.5	579	580
	1.311	572.5	578	581
	1.312	572.5	577.5	579.5
	1.313	574.5	578	573
	1.314	573.5	577	577.5
	1.315	576	578.5	576
	1.316	573	577	576.5
	1.317	573.5	577	576.5
	1.318	573	579.5	577
	1.319	574.5	580.5	578.5
	1.32	574.5	579.5	575.5
	1.321	572	579	579.5
	1.322	573	581	576.5
	1.323	572.5	577	579.5
	1.324	573	577	575
	1.325	572.5	577	574.5
	1.326	571.5	579.5	577
	1.327	575.5	578	577
	1.328	573.5	580.5	576.5
	1.329	574.5	576.5	577
	1.33	575	581	577.5
	1.331	570.5	579.5	574.5
	1.332	575	578	578
	1.333	574.5	578	577
	1.334	567.5	577.5	577
	1.335	569	581.5	577.5
	1.336	569.5	577.5	579.5
	1.337	574.5	579	576.5
	1.338	572.5	580.5	575
	1.339	575	582	581
	1.34	572.5	578.5	574
	1.341	572.5	581	582.5
	1.342	572.5	580	578
	1.343	574.5	575.5	581.5
	1.344	572.5	581	577
	1.345	571	577.5	581
	1.346	575	578.5	582.5
	1.347	574.5	576.5	580.5
	1.348	572	581	575
	1.349	571	579.5	581
	1.35	573.5	577.5	579.5
	1.351	573.5	579	580
	1.352	567.5	578	584
	1.353	574.5	579.5	581.5
	1.354	570.5	579	578.5
	1.355	574.5	580.5	584.5
	1.356	575	579.5	581
	1.357	575	582.5	582.5
	1.358	573.5	582.5	580
	1.359	575.5	581	585
	1.36	576	578.5	582
	1.361	575.5	581	581.5
	1.362	573	581	581
	1.363	576.5	581	581.5
	1.364	574.5	582	581.5
	1.365	573	579.5	583.5
	1.366	572	583.5	585.5
	1.367	573	582.5	582.5
	1.368	575.5	579.5	581.5
	1.369	575	582.5	583.5
	1.37	574.5	584.5	584
	1.371	575	582.5	584.5
	1.372	578.5	581.5	585.5
	1.373	575	583.5	583.5
	1.374	574.5	582	587.5
	1.375	573	581.5	582.5
	1.376	574.5	581	589.5
	1.377	574.5	582.5	584
	1.378	574	580	588
	1.379	575	582	582
	1.38	572	581	583.5
	1.381	576.5	582	587
	1.382	576.5	584	584.5
	1.383	574.5	580	587.5
	1.384	571	580	585
	1.385	571.5	582	586
	1.386	574	581	588
	1.387	574.5	584	585
	1.388	571	584	584.5
	1.389	571.5	582.5	587.5
	1.39	574.5	578.5	582.5
	1.391	573	583.5	585.5
	1.392	575.5	581	586
	1.393	572.5	584	588
	1.394	570	580	584.5
	1.395	573.5	582	585.5
	1.396	573	580	582.5
	1.397	573.5	581	583
	1.398	573	582.5	582.5
	1.399	569.5	585.5	583.5
	1.4	576	581	589
	1.401	574	581	586
	1.402	573.5	579	582.5
	1.403	571.5	582	582
	1.404	574.5	583	585
	1.405	573.5	581	583.5
	1.406	572	582.5	585.5
	1.407	569.5	581.5	587.5
	1.408	574.5	586	586.5
	1.409	574.5	580.5	588
	1.41	567.5	583.5	585
	1.411	570	580.5	585
	1.412	572.5	580	584
	1.413	573.5	582.5	585.5
	1.414	572	580.5	583.5
	1.415	570	579.5	584.5
	1.416	571.5	581.5	582.5
	1.417	571	581.5	581
	1.418	567.5	580	585.5
	1.419	570	581	584.5
	1.42	569	585.5	581.5
	1.421	570	583.5	585.5
	1.422	572	582	583.5
	1.423	567	580.5	581.5
	1.424	566.5	582	581.5
	1.425	570.5	581	582.5
	1.426	569	586	582.5
	1.427	570.5	580	582
	1.428	569	577	586.5
	1.429	573	584.5	583.5
	1.43	571.5	581	581.5
	1.431	570	580.5	584
	1.432	569.5	584.5	583
	1.433	572.5	584	581.5
	1.434	571.5	581	582.5
	1.435	571.5	582	585
	1.436	570	582.5	581
	1.437	569.5	581	581
	1.438	570.5	579.5	584
	1.439	567.5	584.5	583.5
	1.44	571.5	581	582.5
	1.441	568.5	581.5	582.5
	1.442	569.5	580	582
	1.443	571	581	581
	1.444	569.5	580.5	584
	1.445	569.5	585	582.5
	1.446	572	582.5	582.5
	1.447	568.5	580	582.5
	1.448	569.5	583.5	583.5
	1.449	573	581	584
	1.45	567.5	580.5	584.5
	1.451	571	578.5	583
	1.452	571	582.5	580.5
	1.453	569.5	581	583.5
	1.454	569	579.5	582.5
	1.455	569.5	582.5	581
	1.456	567.5	579	585
	1.457	568	582.5	586.5
	1.458	572.5	583.5	585
	1.459	572.5	579.5	588
	1.46	573	581	588
	1.461	573.5	581.5	585
	1.462	569	582	583
	1.463	566	580.5	584
	1.464	572	581	582
	1.465	567.5	578	585.5
	1.466	572	581	586.5
	1.467	572	580.5	585
	1.468	574.5	583	584
	1.469	567.5	581	581
	1.47	570	582	584.5
	1.471	571.5	582.5	582.5
	1.472	570.5	580	580.5
	1.473	571	581.5	582.5
	1.474	571	581	585.5
	1.475	568	583.5	581.5
	1.476	570	581	587.5
	1.477	572.5	579.5	585.5
	1.478	572	581	578.5
	1.479	572.5	581	582
	1.48	574.5	578.5	582.5
	1.481	569	583.5	581
	1.482	568	581	582
	1.483	570.5	583.5	583.5
	1.484	570.5	580	585.5
	1.485	571	581	584
	1.486	572.5	581	583.5
	1.487	568.5	584	585
	1.488	574.5	585	583.5
	1.489	569	581	582
	1.49	570.5	584.5	580
	1.491	572.5	582.5	581
	1.492	573	581	582.5
	1.493	568.5	583.5	582.5
	1.494	572	583	579.5
	1.495	571	580	582.5
	1.496	569.5	580.5	579.5
	1.497	574.5	580	582.5
	1.498	571	579.5	582
	1.499	572.5	579.5	580.5
	1.5	574	583.5	580.5
	1.501	573	582	579
	1.502	570	580	582.5
	1.503	574.5	582.5	581
	1.504	574.5	582	581.5
	1.505	571.5	584.5	580.5
	1.506	572.5	585.5	579.5
	1.507	574.5	584.5	579.5
	1.508	574	581	580
	1.509	575.5	583.5	580
	1.51	573.5	584	578
	1.511	573	581	578.5
	1.512	574.5	582	578
	1.513	573	581.5	582
	1.514	576	583.5	580.5
	1.515	571	582	581
	1.516	574.5	584.5	581
	1.517	574	586	581
	1.518	573	580	584.5
	1.519	574	582	579
	1.52	574.5	581.5	582.5
	1.521	573	583.5	580.5
	1.522	575	582.5	580.5
	1.523	573.5	584	582
	1.524	574.5	580	583
	1.525	574	580.5	583.5
	1.526	576	582	584.5
	1.527	574.5	581	583.5
	1.528	575	580	588
	1.529	574.5	582.5	581
	1.53	573.5	581	583.5
	1.531	576	585.5	581.5
	1.532	578	582.5	583.5
	1.533	571.5	581	584
	1.534	573.5	583.5	584.5
	1.535	573	580.5	585.5
	1.536	575	582.5	586
	1.537	574.5	583.5	587.5
	1.538	574	582.5	583.5
	1.539	575.5	585	589
	1.54	575	584	586
	1.541	576.5	584	586.5
	1.542	573	582	585
	1.543	573	579	585.5
	1.544	572	582	588
	1.545	575	585	586
	1.546	574.5	581.5	588
	1.547	576.5	582.5	588
	1.548	576.5	580.5	588
	1.549	573.5	581	587.5
	1.55	572	586	588
	1.551	575	580	586.5
	1.552	574	582	587
	1.553	576.5	582	589.5
	1.554	575	582.5	589
	1.555	571.5	584.5	590
	1.556	574.5	582.5	588
	1.557	573	579.5	588
	1.558	571	581	587
	1.559	574	580.5	588.5
	1.56	571	581	589
	1.561	575	582.5	586.5
	1.562	574.5	577.5	587
	1.563	572	581	588
	1.564	575	581.5	589
	1.565	575	580.5	585
	1.566	573	578.5	590
	1.567	578.5	583	591
	1.568	571.5	581	588.5
	1.569	576	580	587.5
	1.57	576.5	582.5	588.5
	1.571	571.5	578.5	585.5
	1.572	574.5	581.5	589.5
	1.573	574.5	586.5	586.5
	1.574	575	579.5	586.5
	1.575	573	581	586
	1.576	574	579	587
	1.577	576.5	584.5	586.5
	1.578	574.5	582	584
	1.579	573.5	578.5	584.5
	1.58	575	580	588
	1.581	573.5	582	588
	1.582	572	581.5	586
	1.583	576	581	589.5
	1.584	574.5	580	585.5
	1.585	576	579.5	585.5
	1.586	576.5	582	587
	1.587	571	581	588
	1.588	574.5	581	585
	1.589	573	580.5	588
	1.59	577	579.5	583.5
	1.591	575	585	586
	1.592	574.5	579.5	586
	1.593	574.5	583	588
	1.594	573	583	587
	1.595	576	582.5	582
	1.596	571	585.5	588
	1.597	576.5	582	585.5
	1.598	575.5	581.5	584.5
	1.599	573.5	581	587
	1.6	575.5	580	584.5
	1.601	573.5	581	587
	1.602	573.5	584.5	588
	1.603	574.5	580	584
	1.604	573	582.5	584.5
	1.605	570.5	585.5	585
	1.606	571.5	583.5	587.5
	1.607	572	581	583
	1.608	570.5	585	584.5
	1.609	575.5	584.5	583
	1.61	573	582.5	583
	1.611	573.5	582	582.5
	1.612	574	581.5	584
	1.613	575.5	581	582.5
	1.614	573	586.5	581
	1.615	574.5	582	582
	1.616	570	584.5	581
	1.617	580	582.5	587.5
	1.618	569.5	581	583.5
	1.619	574	581	582
	1.62	574.5	582.5	583.5
	1.621	573.5	581.5	584.5
	1.622	573.5	583.5	585
	1.623	571	582.5	584.5
	1.624	571	584	582
	1.625	573.5	583.5	588
	1.626	571	583.5	581
	1.627	569	583.5	584.5
	1.628	571	582.5	582.5
	1.629	571.5	586.5	585.5
	1.63	572.5	582.5	581.5
	1.631	571.5	581	588
	1.632	573.5	586	588
	1.633	570.5	581	585
	1.634	572.5	580	584
	1.635	569.5	586.5	588
	1.636	574	583	583.5
	1.637	573	585	586.5
	1.638	574	582.5	588
	1.639	574.5	581	588.5
	1.64	572.5	581	588
	1.641	570.5	581	586.5
	1.642	572	586	586
	1.643	574.5	581	585
	1.644	571.5	584	587
	1.645	571	585.5	587.5
	1.646	571	582.5	587
	1.647	572	583	589.5
	1.648	573	581.5	589.5
	1.649	568.5	585.5	588.5
	1.65	571	584.5	589.5
	1.651	571	584	588
	1.652	571	582	589.5
	1.653	571.5	581.5	590.5
	1.654	572.5	581.5	588.5
	1.655	571.5	582.5	592.5
	1.656	571	587	590
	1.657	573.5	580.5	591.5
	1.658	569.5	581	588.5
	1.659	570	581	591
	1.66	571	581	589
	1.661	570	583.5	591
	1.662	571.5	585	588.5
	1.663	569.5	582	592.5
	1.664	572	579.5	592
	1.665	571	582.5	595
	1.666	569.5	582	591
	1.667	571.5	582	592
	1.668	568	583.5	591
	1.669	569	584.5	590
	1.67	568.5	580.5	589.5
	1.671	569.5	582.5	592.5
	1.672	572.5	580.5	593.5
	1.673	572.5	583.5	592
	1.674	567.5	579	591
	1.675	571.5	582.5	593.5
	1.676	568.5	582.5	591.5
	1.677	574.5	579.5	593
	1.678	569.5	579.5	589
	1.679	571	581.5	589.5
	1.68	571.5	581	589
	1.681	573	581.5	590.5
	1.682	573	583.5	590.5
	1.683	570	582.5	590.5
	1.684	569	583.5	590.5
	1.685	572	580.5	586
	1.686	570.5	581	588
	1.687	573	577.5	586
	1.688	573.5	583.5	588
	1.689	571	581.5	588.5
	1.69	570	581.5	587
	1.691	571.5	581	586
	1.692	570.5	582.5	582.5
	1.693	571.5	580	588.5
	1.694	573.5	579	586
	1.695	571	581.5	586
	1.696	570	577.5	586.5
	1.697	574	580.5	588
	1.698	570.5	576	585
	1.699	573	580	582.5
	1.7	572.5	581.5	585
	1.701	575.5	581	585.5
	1.702	573.5	581.5	581.5
	1.703	578	584	582
	1.704	574.5	577.5	578.5
	1.705	572.5	581	580
	1.706	574.5	580.5	584.5
	1.707	573	576	584
	1.708	569.5	582.5	581.5
	1.709	571.5	581.5	580
	1.71	567	581.5	582
	1.711	573	581.5	579
	1.712	573	576.5	576
	1.713	574.5	579.5	581
	1.714	569.5	579	576.5
	1.715	578	580.5	576.5
	1.716	570	581	575.5
	1.717	573.5	581.5	576
	1.718	571	582	576
	1.719	571.5	581	579
	1.72	572	582.5	573.5
	1.721	572	580	576.5
	1.722	572	581	575
	1.723	574.5	583	576
	1.724	572.5	581.5	575.5
	1.725	574	583	572.5
	1.726	573.5	584	579
	1.727	574	584	574
	1.728	568.5	580.5	578
	1.729	574.5	582.5	578
	1.73	571	582.5	574.5
	1.731	571.5	583	580.5
	1.732	572	581.5	574.5
	1.733	570	580	578.5
	1.734	571	584	576.5
	1.735	574.5	580.5	578
	1.736	573	577	575
	1.737	573	585.5	573
	1.738	573.5	582	576.5
	1.739	570.5	583	577.5
	1.74	572.5	581	576
	1.741	574	581.5	575
	1.742	572.5	582	578
	1.743	574	581.5	578.5
	1.744	574.5	580.5	577.5
	1.745	574	579.5	575.5
	1.746	569.5	583.5	577
	1.747	575.5	583.5	577
	1.748	574.5	579.5	576
	1.749	575.5	581.5	577
	1.75	573	579.5	581
	1.751	574.5	581.5	579.5
	1.752	570	579.5	579
	1.753	572	579.5	576.5
	1.754	573	580.5	577
	1.755	573	581	579
	1.756	572	583.5	582
	1.757	570.5	584	577.5
	1.758	576	582.5	578.5
	1.759	575	582.5	585
	1.76	576	581	581
	1.761	574.5	581	584
	1.762	574.5	581	578
	1.763	574.5	583.5	581.5
	1.764	572.5	581	581.5
	1.765	573	582	582
	1.766	573	580.5	581.5
	1.767	575	584.5	582.5
	1.768	574.5	584	583.5
	1.769	573.5	582.5	579.5
	1.77	577	583.5	585
	1.771	572	581.5	581
	1.772	574	584	582.5
	1.773	574.5	582	585.5
	1.774	575	584	582.5
	1.775	577.5	582	581.5
	1.776	573.5	579.5	582.5
	1.777	574.5	582.5	583
	1.778	574.5	583.5	583.5
	1.779	574	584.5	579.5
	1.78	575	580.5	582.5
	1.781	573.5	581.5	581.5
	1.782	574.5	582.5	579.5
	1.783	574.5	582	582.5
	1.784	574	580.5	580
	1.785	574.5	580.5	582
	1.786	574.5	582.5	582
	1.787	573.5	582.5	580
	1.788	575	580.5	580
	1.789	577	581	578
	1.79	576.5	582.5	580.5
	1.791	579	582.5	581
	1.792	575	582	579
	1.793	574.5	581.5	579.5
	1.794	574	584	575.5
	1.795	573.5	585.5	576.5
	1.796	576	582.5	578.5
	1.797	574.5	581	573
	1.798	575	583	577.5
	1.799	574.5	585	575.5
	1.8	575	584	574
	1.801	574.5	582.5	572
	1.802	575.5	582	572.5
	1.803	576.5	579	569.5
	1.804	577.5	581	570
	1.805	577	585.5	570
	1.806	579.5	582.5	572.5
	1.807	578	582.5	565.5
	1.808	576.5	586	567.5
	1.809	575	581	567.5
	1.81	574.5	582	565
	1.811	574	581	563
	1.812	572.5	580.5	566.5
	1.813	570.5	583.5	567
	1.814	577	586	563
	1.815	573.5	581	556
	1.816	574	585	563
	1.817	575.5	583.5	561
	1.818	575	586	560
	1.819	576.5	588	554.5
	1.82	573.5	583.5	555
	1.821	574.5	585.5	558
	1.822	575	581	558.5
	1.823	569	582.5	553
	1.824	572.5	584.5	554
	1.825	572.5	584	552.5
	1.826	571	584.5	555.5
	1.827	570	584.5	553
	1.828	572.5	582.5	552
	1.829	571	584	549
	1.83	572.5	584.5	549.5
	1.831	572	586.5	550
	1.832	575	586	548
	1.833	568	586.5	547
	1.834	571	584	544
	1.835	575.5	585	546.5
	1.836	567.5	584	543.5
	1.837	573.5	586	547
	1.838	572.5	584.5	545.5
	1.839	574.5	588.5	541.5
	1.84	570.5	586.5	541.5
	1.841	571.5	588	542.5
	1.842	574.5	581	543.5
	1.843	569.5	585	538
	1.844	566.5	587	539.5
	1.845	572.5	586	540.5
	1.846	569	586	537.5
	1.847	569	581.5	542.5
	1.848	569.5	581	538
	1.849	569.5	586.5	538
	1.85	571	581	534.5
	1.851	567.5	581	536
	1.852	570	585.5	535
	1.853	569.5	583.5	538
	1.854	570	584	538
	1.855	569	583.5	535.5
	1.856	570	583.5	537
	1.857	574.5	585.5	537
	1.858	568.5	584	541.5
	1.859	572.5	584.5	533.5
	1.86	571.5	581.5	537
	1.861	567.5	581.5	534.5
	1.862	568.5	583.5	535.5
	1.863	569	584	538
	1.864	569	584.5	538
	1.865	569	582	534
	1.866	571.5	584.5	530.5
	1.867	570.5	580	533.5
	1.868	568	581	534
	1.869	571.5	582	536.5
	1.87	573.5	586.5	533
	1.871	567.5	581	532.5
	1.872	573.5	582.5	533.5
	1.873	570	581	537.5
	1.874	572	582	532
	1.875	571	581	531
	1.876	571	583.5	533.5
	1.877	570	583	530.5
	1.878	568.5	584	529.5
	1.879	567.5	583.5	531
	1.88	573	583.5	528
	1.881	572	585	528
	1.882	568	582.5	531
	1.883	570.5	581	530.5
	1.884	574.5	581	529.5
	1.885	570.5	583	529
	1.886	573	581.5	527.5
	1.887	571	582.5	530.5
	1.888	572	579	526
	1.889	568	581.5	523
	1.89	571.5	580	523
	1.891	570	581	525
	1.892	569.5	581	526
	1.893	570.5	579	523
	1.894	570	581	522
	1.895	569.5	582	520.5
	1.896	570.5	580.5	520
	1.897	573	585	518
	1.898	572.5	582	516.5
	1.899	573	579	513.5
	1.9	569.5	582.5	514.5
	1.901	571.5	581	517.5
	1.902	571.5	582.5	513
	1.903	571.5	583.5	509.5
	1.904	574	583.5	507
	1.905	572.5	582.5	511.5
	1.906	571	581	506.5
	1.907	570	587	507.5
	1.908	571	581	504
	1.909	570.5	582	502.5
	1.91	572.5	583	499.5
	1.911	575	582.5	499.5
	1.912	572.5	582	495.5
	1.913	569	581	491.5
	1.914	570	581	494.5
	1.915	572	583	490.5
	1.916	576	588	488
	1.917	566	584.5	482
	1.918	567.5	583	480.5
	1.919	568	585.5	482.5
	1.92	567.5	581	476.5
	1.921	568	582	476.5
	1.922	570	582.5	472.5
	1.923	570.5	585	473.5
	1.924	567.5	581.5	471.5
	1.925	569	588	468.5
	1.926	565.5	583.5	465.5
	1.927	568	586	462.5
	1.928	566	584.5	459.5
	1.929	569	586	457.5
	1.93	565	587.5	453
	1.931	568.5	586.5	455
	1.932	566.5	586	453
	1.933	567	585	450.5
	1.934	567.5	588	451
	1.935	564.5	586	443.5
	1.936	564.5	586.5	444.5
	1.937	563.5	586.5	442.5
	1.938	566.5	584.5	437.5
	1.939	563	588	437.5
	1.94	562.5	586	438
	1.941	564	585.5	432
	1.942	566.5	590.5	431.5
	1.943	563	584.5	431
	1.944	566.5	587.5	429
	1.945	564.5	584.5	426
	1.946	562	586.5	422.5
	1.947	562.5	588	420
	1.948	563	585.5	416.5
	1.949	561.5	587.5	417
	1.95	557.5	585.5	416
	1.951	563	587.5	414
	1.952	561	588	409.5
	1.953	560	586	409
	1.954	560.5	586.5	404.5
	1.955	556.5	586	403.5
	1.956	564.5	583.5	399.5
	1.957	564.5	584.5	398.5
	1.958	560	587	398.5
	1.959	561.5	584.5	397.5
	1.96	560.5	585.5	393
	1.961	562.5	586	390
	1.962	557	586.5	393
	1.963	559.5	584	388.5
	1.964	560.5	582.5	388
	1.965	563.5	583	382.5
	1.966	561	581.5	383
	1.967	560.5	582	380
	1.968	561	584	377
	1.969	563.5	581	378
	1.97	560.5	585	377
	1.971	562.5	581	369.5
	1.972	557.5	581	369
	1.973	563	581	367.5
	1.974	559.5	581.5	363.5
	1.975	561.5	578	362
	1.976	561	585	357.5
	1.977	559	581	353.5
	1.978	563	579.5	355.5
	1.979	560	578.5	353
	1.98	558.5	578	348
	1.981	560	578	347
	1.982	562.5	578.5	349.5
	1.983	564	580	343.5
	1.984	560.5	578	341.5
	1.985	561	575	340
	1.986	561.5	578.5	336.5
	1.987	563	573.5	334.5
	1.988	562	577.5	329.5
	1.989	563	573	331.5
	1.99	564	571.5	328
	1.991	566	572	331
	1.992	563	573.5	325.5
	1.993	562	569.5	322.5
[truncated: 6,006 more rows]

## Sheet: B
DataTypeVer2.0	Time	Fz	Fz	Fz
NumberOfData		8000	8000	8000
PreTriggerData		0	0	0
SamplingTime[ms]		1	1	1
DataLabel		P1:CMJ	P2:CMJ	P3:CMJ
DataUnit	sec	N	N	N
	0	695	692	693.5
	0.001	693	690	690.5
	0.002	695	694.5	692.5
	0.003	695.5	695	690
	0.004	698	692.5	690.5
	0.005	697.5	690	689.5
	0.006	695.5	690	691.5
	0.007	697.5	690.5	687.5
	0.008	697	694.5	688.5
	0.009	697.5	693.5	688.5
	0.01	697.5	693	690.5
	0.011	698	693	687.5
	0.012	696.5	691	689
	0.013	698	693	690
	0.014	697.5	691	687.5
	0.015	696.5	688.5	686
	0.016	697	691.5	689
	0.017	697	687	690
	0.018	698.5	691.5	689.5
	0.019	697.5	690.5	684.5
	0.02	697.5	689	691
	0.021	697.5	690.5	687
	0.022	695	690	685.5
	0.023	697.5	694	686
	0.024	697.5	690	689
	0.025	697.5	689	686
	0.026	697.5	691.5	686.5
	0.027	695.5	691.5	685.5
	0.028	695	688	683
	0.029	700	690	685
	0.03	695.5	694	685
	0.031	697	690.5	684
	0.032	695	691.5	680.5
	0.033	697.5	693.5	680.5
	0.034	698	690.5	680.5
	0.035	694.5	695	683.5
	0.036	694.5	692	684
	0.037	697	691.5	680.5
	0.038	695.5	695.5	682.5
	0.039	697.5	692	680.5
	0.04	694.5	692	680.5
	0.041	699.5	693.5	679.5
	0.042	695.5	694.5	680.5
	0.043	694	692.5	680.5
	0.044	699.5	695	682
	0.045	697.5	693.5	680.5
	0.046	698	690	680.5
	0.047	695.5	696.5	680.5
	0.048	697	693.5	680.5
	0.049	697.5	694	684.5
	0.05	694	695.5	678.5
	0.051	695.5	692	680.5
	0.052	697	695.5	680.5
	0.053	695.5	699	680.5
	0.054	697	695.5	680.5
	0.055	695	690.5	680.5
	0.056	697	698	679
	0.057	695	695.5	680.5
	0.058	695	695.5	679
	0.059	694.5	698.5	684
	0.06	694	695	680.5
	0.061	693.5	697.5	678.5
	0.062	697	695.5	678.5
	0.063	694.5	701.5	680.5
	0.064	693.5	698.5	683.5
	0.065	695.5	697.5	683.5
	0.066	692	700.5	683.5
	0.067	693	698	683.5
	0.068	692.5	700	680
	0.069	695	698	683
	0.07	693.5	699.5	683.5
	0.071	697.5	700	684
	0.072	694	701	680.5
	0.073	692	702.5	680.5
	0.074	692	702	685.5
	0.075	694.5	701.5	680.5
	0.076	694	700	684
	0.077	693	702	687
	0.078	693	702	683.5
	0.079	690	699.5	685.5
	0.08	689.5	702	680.5
	0.081	693	697.5	683.5
	0.082	693.5	698	684.5
	0.083	691	700	683
	0.084	691.5	698.5	683.5
	0.085	690.5	698.5	680.5
	0.086	693	700	684.5
	0.087	690.5	697.5	684
	0.088	690	697.5	683
	0.089	689.5	702.5	685
	0.09	691.5	698	684.5
	0.091	688	698.5	683.5
	0.092	688.5	697	685
	0.093	691	694.5	680.5
	0.094	686	698	684.5
	0.095	684	695.5	688.5
	0.096	686.5	697	683
	0.097	687.5	695.5	687
	0.098	683	695.5	689.5
	0.099	685.5	698	686
	0.1	686	695.5	685
	0.101	688.5	694.5	684.5
	0.102	684	695.5	689
	0.103	680.5	697.5	684
	0.104	684	693.5	687
	0.105	683.5	695.5	685.5
	0.106	686	692.5	684.5
	0.107	680.5	695.5	688
	0.108	680.5	692.5	687.5
	0.109	684	692	685.5
	0.11	684	692	684.5
	0.111	683.5	691	687
	0.112	677	690.5	685.5
	0.113	683	693	685
	0.114	680.5	691	688
	0.115	679	687	687.5
	0.116	680.5	689	686.5
	0.117	680.5	689	688.5
	0.118	678	686	689
	0.119	679.5	687	688.5
	0.12	680.5	686.5	686.5
	0.121	679.5	687	690.5
	0.122	680.5	688.5	688.5
	0.123	679	686	688.5
	0.124	679	686.5	687
	0.125	684	684	690
	0.126	679.5	688	692
	0.127	680.5	685.5	692
	0.128	679.5	685	691
	0.129	680.5	684.5	691.5
	0.13	680.5	683.5	690.5
	0.131	678	684	690.5
	0.132	680.5	680.5	693.5
	0.133	680.5	684.5	691.5
	0.134	679.5	680.5	693.5
	0.135	679.5	685.5	689
	0.136	683	680.5	691
	0.137	684.5	684	691
	0.138	684.5	683.5	693
	0.139	683.5	680.5	691
	0.14	680.5	685	695.5
	0.141	684	680.5	695.5
	0.142	685	684.5	693.5
	0.143	680.5	684	692.5
	0.144	682.5	685	694.5
	0.145	683	680	695
	0.146	686.5	683.5	695.5
	0.147	685	684	695.5
	0.148	688	685.5	697.5
	0.149	686.5	684	695
	0.15	686	684	698
	0.151	687	686.5	697.5
	0.152	686.5	680.5	699
	0.153	686	684	697.5
	0.154	690.5	686.5	697
	0.155	686	687.5	695.5
	0.156	686.5	688	700
	0.157	689.5	686	698
	0.158	690	683.5	697
	0.159	690.5	688	699
	0.16	688	687	699
	0.161	691	689.5	697.5
	0.162	693	692	700.5
	0.163	693	688.5	697.5
	0.164	689.5	690.5	699.5
	0.165	689	689	701
	0.166	690.5	691.5	698.5
	0.167	694.5	690.5	701
	0.168	690.5	691	700
	0.169	691	694	697
	0.17	694	695	700
	0.171	688	693.5	702
	0.172	692	691.5	699
	0.173	693	694	697
	0.174	692	695	699
	0.175	692	693	697.5
	0.176	689.5	695.5	697.5
	0.177	691.5	693	697
	0.178	691.5	695	699
	0.179	695	695.5	697.5
	0.18	690.5	692	700
	0.181	694.5	695.5	697.5
	0.182	689	697	693
	0.183	686	689.5	697.5
	0.184	688.5	695.5	699.5
	0.185	690.5	696.5	699.5
	0.186	688	693.5	697.5
	0.187	692	693	697.5
	0.188	690	693	696.5
	0.189	691.5	693	696.5
	0.19	691	693.5	697.5
	0.191	691	696.5	699.5
	0.192	690	697.5	695.5
	0.193	692	694	697.5
	0.194	689	690	699
	0.195	689	696.5	697.5
	0.196	689.5	697.5	699
	0.197	690	695.5	698.5
	0.198	690	692	697.5
	0.199	691	691.5	698.5
	0.2	689.5	693.5	697.5
	0.201	690.5	688.5	697
	0.202	687	691	699.5
	0.203	691	691.5	693
	0.204	688.5	698	697.5
	0.205	689	691.5	695
	0.206	690.5	692	695.5
	0.207	689.5	690.5	695.5
	0.208	694	691	697.5
	0.209	688	694	694
	0.21	690	692	698.5
	0.211	689.5	690	696.5
	0.212	689.5	689.5	695.5
	0.213	690.5	688.5	691.5
	0.214	692.5	686.5	695.5
	0.215	688.5	687.5	694.5
	0.216	695.5	688.5	696.5
	0.217	689.5	689	693.5
	0.218	690.5	687.5	694
	0.219	692.5	689	693.5
	0.22	694	687	693.5
	0.221	691	684.5	692.5
	0.222	692.5	687	691.5
	0.223	690.5	687	694
	0.224	691	687.5	694
	0.225	693	684	693
	0.226	694	690.5	695.5
	0.227	695.5	685.5	693
	0.228	695.5	685.5	688
	0.229	694	685	693
	0.23	694.5	685.5	693
	0.231	697	686.5	692.5
	0.232	698.5	688	693.5
	0.233	693.5	687.5	690
	0.234	695.5	686.5	691.5
	0.235	695.5	684	692.5
	0.236	698	684	692.5
	0.237	695.5	684.5	689
	0.238	700.5	683.5	691.5
	0.239	699.5	685.5	690
	0.24	698.5	684.5	691.5
	0.241	699	685	690.5
	0.242	702.5	686	693
	0.243	697	688	689
	0.244	700.5	688.5	688
	0.245	700	686.5	691.5
	0.246	699	684.5	692.5
	0.247	699.5	687.5	690.5
	0.248	700	689	686.5
	0.249	697.5	688.5	691
	0.25	698.5	688	688
	0.251	700	686	690.5
	0.252	701.5	690	691
	0.253	698	687	690
	0.254	695.5	689.5	691.5
	0.255	702	687.5	692
	0.256	698.5	689	689
	0.257	702	688.5	689.5
	0.258	700	690.5	689
	0.259	699	688	687.5
	0.26	697.5	691	688
	0.261	697.5	692.5	688
	0.262	698.5	688	686
	0.263	700	691	689.5
	0.264	701	690.5	688
	0.265	695	691.5	688.5
	0.266	697.5	692	690.5
	0.267	695.5	691	688
	0.268	697.5	695.5	689
	0.269	697.5	692	689
	0.27	695.5	690.5	685.5
	0.271	694.5	693.5	687.5
	0.272	695	691	686.5
	0.273	695.5	690.5	690
	0.274	695.5	693.5	688
	0.275	694.5	692	687
	0.276	693	690.5	688
	0.277	695	691.5	689
	0.278	692.5	692	685.5
	0.279	693	692.5	688
	0.28	688	692.5	690
	0.281	690	692	689
	0.282	691.5	690	689
	0.283	691	693.5	687.5
	0.284	693.5	692.5	689.5
	0.285	689.5	691.5	688
	0.286	690.5	693	687
	0.287	688.5	691.5	688
	0.288	689.5	692	686.5
	0.289	688	690.5	687.5
	0.29	688.5	693.5	688
	0.291	691	691.5	688
	0.292	687	695.5	690.5
	0.293	687.5	694	689
	0.294	688.5	695.5	688.5
	0.295	691.5	687.5	690
	0.296	686.5	690	688
	0.297	685	687.5	688.5
	0.298	686.5	690	688
	0.299	690	690	690
	0.3	684.5	690.5	687.5
	0.301	688.5	689	685
	0.302	685.5	688.5	688.5
	0.303	686.5	690.5	688.5
	0.304	684.5	688	688.5
	0.305	685.5	686.5	688
	0.306	689.5	689.5	690.5
	0.307	684	684	686
	0.308	684	685	690.5
	0.309	687	684	688
	0.31	686	685	688
	0.311	685.5	687.5	687.5
	0.312	686	686.5	688.5
	0.313	685	685.5	686.5
	0.314	686	685	688.5
	0.315	686	684	688
	0.316	686.5	686.5	688
	0.317	684	684.5	688
	0.318	690	684.5	688
	0.319	686	687	688.5
	0.32	686	685.5	686
	0.321	685	684.5	687.5
	0.322	683.5	684	688
	0.323	686.5	685	690
	0.324	687	684	689
	0.325	685	683.5	689
	0.326	688	686.5	688
	0.327	688.5	680.5	689.5
	0.328	688	686.5	688
	0.329	689	684	686.5
	0.33	686	684	686.5
	0.331	684	686.5	687
	0.332	690	684.5	686.5
	0.333	685	686	686
	0.334	691	687	683
	0.335	685	683.5	688
	0.336	688.5	685	685
	0.337	686	689.5	688.5
	0.338	689	686	685
	0.339	688	687	689
	0.34	686	687.5	680.5
	0.341	684.5	690	690.5
	0.342	687.5	688	687
	0.343	689	687	685.5
	0.344	687	687.5	684.5
	0.345	689.5	691	684.5
	0.346	689	693	684
	0.347	689.5	689	684.5
	0.348	688.5	688	684
	0.349	686.5	689.5	683.5
	0.35	692.5	692	683.5
	0.351	688	687.5	684
	0.352	685.5	685	683
	0.353	689	690.5	685
	0.354	689	690.5	684
	0.355	687.5	688	687
	0.356	687	690	683.5
	0.357	687	694.5	688.5
	0.358	690	695	684.5
	0.359	688.5	694	682.5
	0.36	688	692	684.5
	0.361	687.5	694.5	685.5
	0.362	688.5	697.5	686
	0.363	686	693.5	680.5
	0.364	688	695.5	685
	0.365	687.5	693.5	684.5
	0.366	684	693.5	686.5
	0.367	684.5	693	686.5
	0.368	689.5	695	686
	0.369	690.5	693	685
	0.37	686.5	694.5	685
	0.371	687.5	692.5	685.5
	0.372	688	698.5	686
	0.373	687	694	684.5
	0.374	687.5	693	685.5
	0.375	690.5	696.5	689
	0.376	688	694.5	686.5
	0.377	689.5	691	683.5
	0.378	687.5	693.5	690.5
	0.379	689	695.5	686.5
	0.38	690	695	688
	0.381	691	693.5	689.5
	0.382	691	693.5	688
	0.383	691	694.5	686.5
	0.384	690.5	693.5	689
	0.385	689	693.5	689
	0.386	693	691.5	687.5
	0.387	693	690	686
	0.388	691.5	691	690
	0.389	694	692	690
	0.39	692	688.5	688.5
	0.391	690.5	688.5	690
	0.392	695.5	690.5	690.5
	0.393	693	693	686
	0.394	691.5	688.5	691
	0.395	694	690.5	688.5
	0.396	692.5	688	690
	0.397	694	692	689
	0.398	690.5	690	689.5
	0.399	695	692.5	687.5
	0.4	692	688	690.5
	0.401	694	688	687
	0.402	695.5	686.5	690
	0.403	691.5	686	689.5
	0.404	693	688.5	689.5
	0.405	694.5	689	689.5
	0.406	694	690.5	691
	0.407	695.5	688.5	689.5
	0.408	693.5	687.5	689
	0.409	691	689.5	690
	0.41	695.5	686	694
	0.411	693.5	688	689.5
	0.412	695	690.5	688
	0.413	693.5	690.5	689.5
	0.414	698	686.5	689
	0.415	693.5	688.5	686.5
	0.416	693.5	687.5	690
	0.417	690	689	689
	0.418	694	687	689
	0.419	692.5	689	685.5
	0.42	687	686	688.5
	0.421	692.5	684.5	689
	0.422	694	688.5	684
	0.423	695.5	686	685.5
	0.424	690	689.5	688
	0.425	689.5	690	686
	0.426	687.5	690.5	686.5
	0.427	690	689	689.5
	0.428	692	689	690.5
	0.429	690.5	692.5	690
	0.43	686.5	689	687
	0.431	689.5	691	688
	0.432	687.5	691.5	689.5
	0.433	689	694.5	686
	0.434	690	689	686.5
	0.435	687	692	686.5
	0.436	689.5	689	687
	0.437	688	690.5	689.5
	0.438	687.5	690	686
	0.439	688.5	691	688
	0.44	689	692.5	685.5
	0.441	685	692.5	690.5
	0.442	686	688.5	685
	0.443	691.5	690	688.5
	0.444	689	690	684
	0.445	688	691.5	685.5
	0.446	687	690.5	690
	0.447	688	694.5	685
	0.448	688	690.5	688.5
	0.449	687.5	689	688
	0.45	687.5	691.5	690.5
	0.451	688	692.5	689
	0.452	684	692.5	688
	0.453	687	693	687.5
	0.454	688	694.5	689.5
	0.455	687.5	692.5	689.5
	0.456	687.5	691.5	689.5
	0.457	689	690.5	686.5
	0.458	690	692.5	690
	0.459	687.5	694	690.5
	0.46	691.5	692.5	693.5
	0.461	690	694.5	693
	0.462	689	694.5	690
	0.463	687.5	691	689.5
	0.464	690.5	690.5	690
	0.465	691.5	692	692.5
	0.466	688.5	690	693
	0.467	690.5	691.5	692.5
	0.468	686.5	690	691.5
	0.469	688.5	690.5	689.5
	0.47	688	691.5	693
	0.471	685.5	693	693.5
	0.472	688	690	694.5
	0.473	690.5	690.5	695.5
	0.474	693	689.5	691.5
	0.475	690	690	694
	0.476	690	689.5	693
	0.477	689.5	692.5	694.5
	0.478	691	691.5	695.5
	0.479	689	687.5	693.5
	0.48	692	688	695.5
	0.481	690.5	693.5	696.5
	0.482	694	686.5	696.5
	0.483	689.5	687.5	697.5
	0.484	690.5	686	697
	0.485	688	688.5	695.5
	0.486	692.5	688	697.5
	0.487	687.5	685.5	692.5
	0.488	690	686	694.5
	0.489	688.5	688	695
	0.49	692	685.5	695.5
	0.491	689.5	686	695.5
	0.492	692	685	699
	0.493	693	685	693.5
	0.494	688	687.5	695.5
	0.495	692.5	687.5	694
	0.496	688	690	695.5
	0.497	690.5	685	693.5
	0.498	686	685.5	694
	0.499	691	684.5	695
	0.5	692	686.5	694.5
	0.501	689	687	692.5
	0.502	691.5	685.5	692.5
	0.503	688	685.5	692
	0.504	688	680.5	693.5
	0.505	690	685	690.5
	0.506	688	687	693.5
	0.507	690.5	689	692
	0.508	688	687	691
	0.509	689	684	691
	0.51	690	684.5	695.5
	0.511	684	688	691.5
	0.512	688	687.5	693
	0.513	688.5	684	693
	0.514	688	680.5	692
	0.515	688	686	688.5
	0.516	688	686.5	692
	0.517	688.5	690	691
	0.518	689	692	692
	0.519	687.5	686.5	690.5
	0.52	689	687.5	692
	0.521	687.5	684.5	689.5
	0.522	687	687.5	692
	0.523	689	686.5	693.5
	0.524	685.5	684.5	690
	0.525	690	689	694.5
	0.526	688.5	690.5	690.5
	0.527	690.5	689	692.5
	0.528	689	688.5	690
	0.529	690.5	690.5	692.5
	0.53	690	687	690.5
	0.531	686	690	688
	0.532	690.5	688	688.5
	0.533	689.5	694.5	687.5
	0.534	687	685	691
	0.535	690.5	690.5	689
	0.536	687	690	693
	0.537	687.5	695	690.5
	0.538	688	691.5	690.5
	0.539	689	689	692
	0.54	686.5	689	690
	0.541	686.5	689.5	691.5
	0.542	689	690.5	687
	0.543	686	690.5	686.5
	0.544	685	689.5	691.5
	0.545	685.5	695	691
	0.546	684.5	690.5	691.5
	0.547	690	692	694
	0.548	684	694	690.5
	0.549	688	693	690
	0.55	686	695.5	686.5
	0.551	686.5	692.5	687
	0.552	687	693.5	688
	0.553	689	691.5	690
	0.554	686	694.5	691.5
	0.555	688	693	689.5
	0.556	689	695.5	690.5
	0.557	690.5	694.5	690.5
	0.558	689.5	697	691.5
	0.559	687.5	692.5	690.5
	0.56	688	693.5	692
	0.561	689.5	689.5	686.5
	0.562	686.5	693.5	688
	0.563	689.5	693.5	691
	0.564	689	693.5	687.5
	0.565	688.5	692.5	685.5
	0.566	690	694	690.5
	0.567	690.5	693	687
	0.568	680.5	690	689.5
	0.569	687.5	694	688
	0.57	690	689.5	689
	0.571	692.5	694.5	690
	0.572	689.5	695	687.5
	0.573	688	692.5	688.5
	0.574	689	692.5	691
	0.575	687.5	691.5	691.5
	0.576	685.5	692.5	687
	0.577	687.5	692	688
	0.578	692.5	693	690.5
	0.579	689.5	693	686.5
	0.58	687	689.5	688.5
	0.581	690.5	695.5	688
	0.582	689.5	692	691
	0.583	686.5	691.5	687.5
	0.584	688.5	691	686.5
	0.585	689	690.5	689.5
	0.586	686	695.5	687.5
	0.587	690.5	693	691
	0.588	691.5	690	686.5
	0.589	692.5	692.5	688.5
	0.59	691	689.5	687.5
	0.591	691	693	685
	0.592	693	691.5	688
	0.593	689	690.5	690.5
	0.594	692.5	690	689
	0.595	691.5	690	689.5
	0.596	693	690.5	688
	0.597	689.5	689.5	687.5
	0.598	690	691.5	688
	0.599	694.5	687.5	689.5
	0.6	692	688	689
	0.601	690.5	689.5	690
	0.602	689	690.5	690.5
	0.603	689.5	692	690
	0.604	688	687.5	687
	0.605	691	688.5	690
	0.606	690	687.5	688
	0.607	689	690.5	689.5
	0.608	690.5	691	691.5
	0.609	691.5	690.5	693
	0.61	689	688	690.5
	0.611	690	686	694.5
	0.612	689.5	690	689.5
	0.613	690.5	690	688
	0.614	689.5	691.5	690.5
	0.615	690.5	690.5	687
	0.616	691	691	688.5
	0.617	691	691.5	688
	0.618	687.5	692.5	689.5
	0.619	690	690.5	690.5
	0.62	691	693	690.5
	0.621	689.5	691	690.5
	0.622	690.5	691	690.5
	0.623	690.5	693.5	691
	0.624	690.5	693.5	692.5
	0.625	691	693	691.5
	0.626	692.5	691.5	687
	0.627	687.5	693.5	687
	0.628	692	692	685.5
	0.629	690.5	695.5	690
	0.63	689.5	691.5	690.5
	0.631	687.5	693.5	692.5
	0.632	688	690	690
	0.633	687.5	693.5	691
	0.634	691.5	693	691.5
	0.635	688	692.5	687.5
	0.636	686.5	695	687.5
	0.637	687.5	694	689
	0.638	690	693	689
	0.639	688	697.5	691.5
	0.64	687	690.5	688.5
	0.641	688	693.5	690
	0.642	688	693.5	686
	0.643	689	695.5	690.5
	0.644	693.5	691	690.5
	0.645	687.5	696.5	690.5
	0.646	687.5	695	688
	0.647	690.5	693.5	687
	0.648	689	695	692.5
	0.649	690.5	692	691
	0.65	689.5	695.5	690.5
	0.651	688.5	697.5	686.5
	0.652	690.5	692.5	692
	0.653	693	695	690
	0.654	688	694.5	693
	0.655	690.5	694	686.5
	0.656	689	695.5	690.5
	0.657	688	694.5	690.5
	0.658	687.5	695	688
	0.659	688.5	694.5	695
	0.66	692.5	693.5	689.5
	0.661	691	697.5	691.5
	0.662	687.5	695.5	689
	0.663	690	695	687.5
	0.664	690.5	694.5	690.5
	0.665	690.5	697.5	691.5
	0.666	690.5	697.5	689
	0.667	691	693	690.5
	0.668	691	690.5	693
	0.669	691	693.5	688.5
	0.67	692	693	689.5
	0.671	692	691	687.5
	0.672	691.5	694	692.5
	0.673	689	691	691.5
	0.674	691.5	693.5	691.5
	0.675	691	693	689
	0.676	694.5	692.5	690.5
	0.677	692	694	694
	0.678	692	695.5	690.5
	0.679	690.5	693	691
	0.68	691.5	693.5	692
	0.681	691	692	690
	0.682	689	693	693.5
	0.683	692	696.5	695
	0.684	691.5	690.5	692
	0.685	693	691.5	694.5
	0.686	691.5	693.5	692
	0.687	694	694	690
	0.688	693	691	691.5
	0.689	693	688.5	692.5
	0.69	694.5	690	692.5
	0.691	693	691	692
	0.692	695.5	689	690
	0.693	693	689	693.5
	0.694	693	689.5	692
	0.695	693.5	690.5	694.5
	0.696	691.5	688.5	692
	0.697	695	687	691.5
	0.698	690.5	689	693
	0.699	695	689.5	695
	0.7	692.5	688	693.5
	0.701	691.5	688	694
	0.702	693	688	694
	0.703	693	688	693.5
	0.704	690.5	687	692.5
	0.705	689.5	687	694.5
	0.706	691	690.5	693.5
	0.707	693	687.5	691.5
	0.708	691.5	687.5	692.5
	0.709	693	686	696.5
	0.71	689	690.5	694.5
	0.711	693	689	693
	0.712	693.5	687.5	694.5
	0.713	693	689.5	693
	0.714	690.5	685.5	694.5
	0.715	691	690	691.5
	0.716	692	688	690.5
	0.717	691.5	688	693
	0.718	692.5	687	691
	0.719	691	686.5	692
	0.72	690	687.5	690.5
	0.721	690.5	686	695
	0.722	692	690	689.5
	0.723	691	689.5	693
	0.724	694	691	689
	0.725	689.5	690	691.5
	0.726	691	687	689.5
	0.727	688	691.5	694.5
	0.728	691	689.5	693
	0.729	686	690.5	692
	0.73	689	691	692
	0.731	686	692.5	692.5
	0.732	686.5	695.5	690.5
	0.733	684	688	687
	0.734	687	690.5	689.5
	0.735	689	690	689.5
	0.736	685.5	690.5	688
	0.737	685	690.5	685.5
	0.738	684.5	692	687
	0.739	687.5	689	687.5
	0.74	687	694	690.5
	0.741	687	693	689.5
	0.742	684.5	693.5	691
	0.743	686	693.5	685.5
	0.744	686	693.5	687
	0.745	686.5	693.5	691
	0.746	686.5	691.5	688.5
	0.747	685.5	692.5	686
	0.748	684	693	688.5
	0.749	686.5	693.5	689
	0.75	684	696.5	687
	0.751	685	693.5	688
	0.752	687.5	692.5	689
	0.753	684.5	694.5	688
	0.754	688	694.5	690
	0.755	686	691	687
	0.756	687	693	686
	0.757	680.5	695	689
	0.758	686	694.5	689.5
	0.759	685	695.5	689.5
	0.76	684	692	684
	0.761	689.5	697	685.5
	0.762	687.5	692.5	686.5
	0.763	684	694	690.5
	0.764	688	695.5	684
	0.765	687	693.5	689
	0.766	686.5	695.5	687.5
	0.767	687	695.5	687
	0.768	690	695.5	687
	0.769	686	691.5	687.5
	0.77	689.5	692.5	688
	0.771	689	695.5	688.5
	0.772	689.5	695.5	687
	0.773	689.5	695.5	687.5
	0.774	690	693	689.5
	0.775	690.5	691.5	689.5
	0.776	689	689	689
	0.777	688.5	693.5	690
	0.778	689	694	691
	0.779	694	691	690.5
	0.78	692.5	691	692.5
	0.781	688	694	687
	0.782	690	694	689.5
	0.783	694	690.5	690.5
	0.784	691	694.5	690
	0.785	692.5	690.5	690
	0.786	695.5	692.5	687.5
	0.787	692.5	691	690
	0.788	689	687.5	688.5
	0.789	697	687.5	690
	0.79	693.5	690.5	690.5
	0.791	694	690.5	687.5
	0.792	691.5	690	692
	0.793	691	691	693
	0.794	695	688.5	687
	0.795	693	685	690.5
	0.796	693.5	689.5	691.5
	0.797	693.5	689.5	691.5
	0.798	693.5	689	689
	0.799	695.5	687	695.5
	0.8	693	690	687.5
	0.801	692	690	690
	0.802	693.5	688	690.5
	0.803	695.5	685.5	690
	0.804	691.5	684	691.5
	0.805	693.5	685.5	691
	0.806	694	687	690.5
	0.807	692	686	691
	0.808	695.5	684.5	692
	0.809	693.5	685.5	688.5
	0.81	693.5	687	691.5
	0.811	693.5	687	692
	0.812	690.5	686.5	688.5
	0.813	694.5	684	690
	0.814	692	688	692.5
	0.815	692	685	688.5
	0.816	692	688	687
	0.817	692.5	687.5	689
	0.818	688	689	689
	0.819	695	685	688
	0.82	692.5	686	687
	0.821	689.5	686	688
	0.822	691.5	686.5	687.5
	0.823	695	680.5	689.5
	0.824	692.5	686.5	686.5
	0.825	690	687	686.5
	0.826	691	690	687.5
	0.827	688	686	691
	0.828	691.5	687	687.5
	0.829	691	687	687
	0.83	689	689	686.5
	0.831	689.5	691.5	684.5
	0.832	689.5	686	687
	0.833	690.5	689.5	685
	0.834	686	687.5	686.5
	0.835	693	688.5	688.5
	0.836	690	690.5	687
	0.837	691	693	686.5
	0.838	688.5	687.5	689
	0.839	690.5	689.5	686.5
	0.84	690.5	691.5	688.5
	0.841	688	694	684.5
	0.842	690	690	687.5
	0.843	688.5	689.5	688.5
	0.844	690.5	690.5	686
	0.845	690.5	693	690.5
	0.846	689.5	691.5	686
	0.847	690.5	690.5	686
	0.848	690.5	692	687.5
	0.849	691	693	683.5
	0.85	691	693.5	684.5
	0.851	686.5	690.5	690.5
	0.852	690.5	694.5	685
	0.853	688.5	695.5	688.5
	0.854	689	692.5	688
	0.855	689.5	697.5	688.5
	0.856	691.5	693.5	689.5
	0.857	690.5	692	686
	0.858	690.5	694.5	688
	0.859	693	694.5	688
	0.86	690	691.5	690
	0.861	695.5	692.5	689.5
	0.862	691.5	691	690
	0.863	692.5	689.5	687
	0.864	692	693	686.5
	0.865	693.5	692	688
	0.866	692	693	690
	0.867	690.5	692.5	688
	0.868	690.5	691.5	690.5
	0.869	691.5	690.5	685
	0.87	690	694	688.5
	0.871	692	691.5	685.5
	0.872	695.5	692	690
	0.873	692.5	689	685.5
	0.874	693	690.5	684.5
	0.875	688	688.5	690
	0.876	693	691.5	690
	0.877	690	688	690.5
	0.878	692	688	688
	0.879	694.5	690.5	688
	0.88	694.5	688	690
	0.881	693.5	691	690
	0.882	692.5	689.5	689.5
	0.883	694	687	687
	0.884	692	688	688
	0.885	692	687.5	690.5
	0.886	695	689	693
	0.887	695.5	687	689.5
	0.888	691	687.5	691
	0.889	692.5	687.5	687
	0.89	690.5	686.5	690
	0.891	691	690	693.5
	0.892	694	687.5	689
	0.893	691.5	684.5	694.5
	0.894	691	688	692
	0.895	693.5	686.5	687
	0.896	691.5	685.5	689
	0.897	692	685.5	688
	0.898	690.5	686.5	691.5
	0.899	691.5	688.5	690.5
	0.9	689.5	687	689
	0.901	690	684.5	688.5
	0.902	691	686	692
	0.903	690	688	691.5
	0.904	690.5	685.5	690.5
	0.905	687.5	685.5	686.5
	0.906	687	686.5	689.5
	0.907	690.5	686	690
	0.908	690	687	691
	0.909	687.5	684.5	693
	0.91	688	689	690.5
	0.911	689.5	689.5	689.5
	0.912	689.5	685	691
	0.913	690.5	689	690
	0.914	685.5	686.5	689
	0.915	686	687.5	690.5
	0.916	688	688.5	688
	0.917	688	688	692
	0.918	686.5	688	690
	0.919	687	688	689
	0.92	686.5	691.5	690.5
	0.921	688	689.5	690.5
	0.922	686.5	688	688
	0.923	687.5	686	689
	0.924	683.5	691	690
	0.925	688.5	694	690
	0.926	690	695.5	689
	0.927	688	688	692
	0.928	688	692.5	687.5
	0.929	689	695.5	692.5
	0.93	687	694.5	691.5
	0.931	689	695.5	691
	0.932	690	691.5	691.5
	0.933	685	690.5	690.5
	0.934	690.5	694	688
	0.935	685.5	692	689.5
	0.936	690	694	687
	0.937	689.5	693.5	690.5
	0.938	690	698.5	686
	0.939	688	693.5	688.5
	0.94	690.5	697	689.5
	0.941	689	695.5	689.5
	0.942	689	697.5	690.5
	0.943	691.5	697.5	687.5
	0.944	692	691.5	686.5
	0.945	691	695.5	688
	0.946	688.5	695.5	690.5
	0.947	689.5	695.5	688
	0.948	686.5	699	688.5
	0.949	689	697	690.5
	0.95	692	696.5	688
	0.951	689	695.5	690.5
	0.952	689	697.5	688
	0.953	687.5	694.5	690.5
	0.954	688.5	696.5	690.5
	0.955	689.5	697.5	688.5
	0.956	690	696.5	692
	0.957	690.5	694.5	688
	0.958	691	695.5	691
	0.959	688	697.5	690.5
	0.96	688	695.5	692
	0.961	689.5	694.5	688.5
	0.962	686.5	695.5	690.5
	0.963	686	693.5	688
	0.964	685	697.5	690.5
	0.965	687.5	695.5	691.5
	0.966	687	694	690.5
	0.967	687.5	695	687
	0.968	690.5	693.5	688
	0.969	684	694	690.5
	0.97	687.5	691.5	691
	0.971	690	693	688
	0.972	687.5	694	687.5
	0.973	690	690.5	691
	0.974	688	690.5	689.5
	0.975	685.5	693	690
	0.976	687	694.5	690
	0.977	685	689.5	689
	0.978	688.5	691.5	689.5
	0.979	687.5	689	691
	0.98	686	689	692
	0.981	688	688	689
	0.982	684	686.5	692
	0.983	685	691	691.5
	0.984	686	686	691.5
	0.985	684	690.5	691
	0.986	686	689.5	690.5
	0.987	679.5	684	695.5
	0.988	684.5	690	691
	0.989	683.5	688	691.5
	0.99	686	680.5	692
	0.991	685	687.5	693
	0.992	686	687	693
	0.993	686	686.5	690.5
	0.994	687.5	685.5	691
	0.995	684.5	686.5	692.5
	0.996	685.5	686	692.5
	0.997	689.5	684	690
	0.998	687	684	691.5
	0.999	687.5	687	692
	1	684.5	684.5	688.5
	1.001	687.5	686	692
	1.002	688	687	693.5
	1.003	684.5	685	691.5
	1.004	685.5	685	694
	1.005	687.5	684	688.5
	1.006	689.5	686	690.5
	1.007	687.5	688.5	688
	1.008	684.5	686	689.5
	1.009	687	688	689
	1.01	685.5	685.5	692
	1.011	692.5	686	690.5
	1.012	688.5	685.5	692.5
	1.013	692	686	689
	1.014	693	687	691
	1.015	688	688	688.5
	1.016	690.5	686	690
	1.017	690.5	691.5	690.5
	1.018	692.5	689	688
	1.019	690	685	686.5
	1.02	691.5	687	689
	1.021	691.5	689	688
	1.022	692	691.5	688
	1.023	688	690.5	689
	1.024	695	690.5	687.5
	1.025	690.5	693.5	688.5
	1.026	693	692.5	689
	1.027	692.5	692	684
	1.028	693.5	691.5	688.5
	1.029	694	689.5	687.5
	1.03	692.5	692	690
	1.031	690.5	691	692.5
	1.032	691.5	688	687
	1.033	693	693	689
	1.034	692.5	692	686
	1.035	697.5	692.5	684
	1.036	690.5	691.5	687
	1.037	692.5	694.5	690.5
	1.038	691	695	687.5
	1.039	690.5	696.5	684
	1.04	691	692	687
	1.041	696.5	695	689
	1.042	692.5	691.5	683
	1.043	693.5	691	684
	1.044	691	695.5	686
	1.045	688.5	693.5	687
	1.046	689.5	693	689.5
	1.047	690	691	689.5
	1.048	693.5	692	689
	1.049	691.5	698.5	690
	1.05	690.5	692.5	687.5
	1.051	690.5	695	686
	1.052	687.5	693	691.5
	1.053	689.5	693.5	692
	1.054	694.5	692.5	688.5
	1.055	691.5	692.5	689.5
	1.056	688	691.5	690
	1.057	692.5	689.5	687
	1.058	691.5	691.5	691.5
	1.059	691.5	689.5	689
	1.06	688	690.5	690
	1.061	689.5	692	690.5
	1.062	690.5	693	691.5
	1.063	690	691	688
	1.064	688	688	690
	1.065	692	686.5	690
	1.066	690.5	685	692.5
	1.067	688.5	690.5	690.5
	1.068	691	686	690.5
	1.069	692.5	687	690
	1.07	692.5	685	691
	1.071	690	684.5	690.5
	1.072	690	685.5	690
	1.073	690.5	687.5	689
	1.074	690.5	690	690
	1.075	691	685.5	690.5
	1.076	689	686	691
	1.077	687	688	691.5
	1.078	692	684.5	689
	1.079	692.5	684	691
	1.08	690	683.5	688.5
	1.081	691.5	687	692.5
	1.082	688	687.5	691
	1.083	686.5	687.5	690.5
	1.084	686.5	684.5	692
	1.085	689	683.5	691
	1.086	689	683.5	692
	1.087	691	684	690.5
	1.088	690	682.5	693
	1.089	690.5	686	693.5
	1.09	688.5	679.5	691
	1.091	695.5	684.5	691.5
	1.092	691.5	684.5	691.5
	1.093	689.5	680.5	689.5
	1.094	689.5	680.5	693
	1.095	687	684	689
	1.096	692	684	688.5
	1.097	690.5	680.5	689.5
	1.098	689.5	683	690
	1.099	690	684.5	690.5
	1.1	690.5	685.5	689
	1.101	694.5	684	690
	1.102	689	686.5	690
	1.103	688.5	685.5	691
	1.104	690	687.5	692.5
	1.105	695.5	684	692
	1.106	689	688	690
	1.107	690	686	691
	1.108	687.5	683.5	692.5
	1.109	690.5	690	691.5
	1.11	688	687	687
	1.111	688.5	687.5	692
	1.112	690	685	688
	1.113	691.5	689.5	687.5
	1.114	691.5	689	691.5
	1.115	690.5	689.5	687.5
	1.116	691.5	686.5	689.5
	1.117	693.5	691	691
	1.118	690.5	690.5	689
	1.119	694.5	691	689
	1.12	693.5	692.5	687
	1.121	693.5	691	686.5
	1.122	693.5	692.5	687
	1.123	691.5	690.5	687
	1.124	691.5	693	687
	1.125	694	692.5	686.5
	1.126	691.5	694	685.5
	1.127	695.5	694.5	687
	1.128	690	696	685
	1.129	691.5	694	689.5
	1.13	694.5	692.5	687
	1.131	697.5	693	689
	1.132	696.5	695.5	690
	1.133	691.5	695.5	686.5
	1.134	695.5	697.5	685
	1.135	692.5	694.5	689
	1.136	690.5	693.5	686.5
	1.137	694	694.5	686
	1.138	693.5	694	687
	1.139	694.5	695	687.5
	1.14	695.5	698	690
	1.141	695	696.5	690.5
	1.142	689.5	694	687.5
	1.143	693.5	698.5	688.5
	1.144	688	695.5	686.5
	1.145	691.5	697.5	688
	1.146	693.5	697.5	687.5
	1.147	691	695.5	691
	1.148	691.5	695.5	690
	1.149	693.5	694	690
	1.15	692	695.5	686.5
	1.151	692	694	689.5
	1.152	695	694	687.5
	1.153	689.5	693	690.5
	1.154	692.5	695	689
	1.155	690.5	695	692
	1.156	690.5	693	693.5
	1.157	691	691.5	690.5
	1.158	689.5	692	690.5
	1.159	692.5	694	693
	1.16	691	694.5	690.5
	1.161	689	693	691
	1.162	690	691	692.5
	1.163	690.5	692	693
	1.164	689	694.5	693
	1.165	692	691.5	693
	1.166	688.5	694	691
	1.167	690.5	694	693
	1.168	684.5	687.5	690
	1.169	690	690.5	691
	1.17	690.5	691	692.5
	1.171	688	692.5	693.5
	1.172	686	692	693
	1.173	686.5	688.5	693
	1.174	685.5	694	693.5
	1.175	682.5	690	693
	1.176	683	688	693
	1.177	685	690.5	693.5
	1.178	688	692	693
	1.179	683.5	691	694
	1.18	684.5	693	692.5
	1.181	688	690.5	693
	1.182	684.5	691.5	693
	1.183	689.5	692.5	693
	1.184	687	690.5	692
	1.185	686	689	690
	1.186	684.5	691.5	695.5
	1.187	683	693	693
	1.188	688.5	689.5	691.5
	1.189	683.5	692.5	693
	1.19	683	688	693
	1.191	685.5	690.5	689.5
	1.192	684	689	690.5
	1.193	685.5	691.5	692.5
	1.194	684.5	687.5	692.5
	1.195	684	693	689
	1.196	687	691	694.5
	1.197	685.5	692	690.5
	1.198	686	688	694.5
	1.199	687	693.5	691.5
	1.2	686	690.5	690
	1.201	685	691	694.5
	1.202	686.5	690.5	690
	1.203	685	691	690.5
	1.204	688	693.5	692
	1.205	685.5	689.5	690
	1.206	684.5	690.5	691.5
	1.207	686.5	693.5	693
	1.208	688	693	690.5
	1.209	688	693.5	689
	1.21	689.5	693.5	692.5
	1.211	690	693.5	692.5
	1.212	690.5	694.5	690
	1.213	689.5	693	693
	1.214	690	692	690.5
	1.215	689.5	695.5	691
	1.216	689.5	692.5	692.5
	1.217	689.5	687	694
	1.218	690.5	692.5	689.5
	1.219	690	691	691
	1.22	689.5	693.5	690
	1.221	690.5	690.5	688.5
	1.222	690	693	687.5
	1.223	690	693.5	690.5
	1.224	690.5	693	691.5
	1.225	689.5	694.5	691
	1.226	687	693	683.5
	1.227	689.5	692.5	690
	1.228	690.5	694.5	688.5
	1.229	690.5	695.5	688
	1.23	691	693.5	687
	1.231	688.5	693.5	689
	1.232	692.5	692	687.5
	1.233	688.5	690.5	684.5
	1.234	691	691	686.5
	1.235	685	691.5	689.5
	1.236	692.5	688	685
	1.237	691.5	690.5	685.5
	1.238	692	694	686
	1.239	690	693.5	689.5
	1.24	691.5	694.5	687.5
	1.241	690.5	693	689
	1.242	690.5	691.5	693
	1.243	688.5	690	689.5
	1.244	691.5	690.5	685.5
	1.245	694.5	688	688
	1.246	692	688	690
	1.247	691.5	690.5	687
	1.248	689.5	692.5	687.5
	1.249	688.5	692.5	685
	1.25	690	688	690
	1.251	690.5	690	686.5
	1.252	690	693	690
	1.253	693.5	690	686
	1.254	688.5	688.5	688.5
	1.255	688.5	691.5	690.5
	1.256	692	688	688
	1.257	691.5	689	691
	1.258	689	692	687.5
	1.259	690.5	686	693
	1.26	693	687.5	689
	1.261	689.5	690	690.5
	1.262	691.5	689.5	692
	1.263	691	688.5	691.5
	1.264	690	687	692.5
	1.265	692	692	691.5
	1.266	692	691.5	688
	1.267	691	687.5	692
	1.268	690	689.5	691
	1.269	692.5	687	691
	1.27	688.5	692.5	693
	1.271	690.5	688	694.5
	1.272	693.5	686	693.5
	1.273	690.5	692	690.5
	1.274	692	690	691.5
	1.275	689	690.5	692
	1.276	690.5	685.5	693.5
	1.277	691	688.5	691.5
	1.278	692	687.5	691
	1.279	690.5	692.5	694
	1.28	695	691	695
	1.281	691.5	688	694
	1.282	694.5	689	693
	1.283	693	688	691
	1.284	688.5	689	693.5
	1.285	691.5	688.5	693
	1.286	693.5	687	691.5
	1.287	693	691	690.5
	1.288	695	689	693
	1.289	689	689.5	691.5
	1.29	690.5	689	690.5
	1.291	688	687	690.5
	1.292	691	689.5	689
	1.293	692.5	688.5	692.5
	1.294	690.5	688	693
	1.295	694.5	689.5	687
	1.296	694	687.5	690.5
	1.297	692.5	687.5	689.5
	1.298	693	688	687.5
	1.299	688	686.5	691
	1.3	694.5	686.5	689
	1.301	694	688	691
	1.302	694	688	689
	1.303	694	686	688
	1.304	693	693	685.5
	1.305	694.5	685.5	690.5
	1.306	693.5	687.5	689
	1.307	688	693.5	687.5
	1.308	692.5	687	687.5
	1.309	694	686	685.5
	1.31	692	688	687
	1.311	693.5	691.5	686.5
	1.312	692.5	688	685
	1.313	695.5	689.5	684
	1.314	693.5	688	688
	1.315	698	685.5	687
	1.316	694	685.5	684
	1.317	692.5	687	686
	1.318	694.5	684.5	686.5
	1.319	694	685	683.5
	1.32	694.5	687	685.5
	1.321	694	686	684
	1.322	694.5	688	684
	1.323	692.5	688	686
	1.324	692.5	690	686.5
	1.325	693	688	689
	1.326	694	683.5	687.5
	1.327	694.5	686	684
	1.328	694.5	687	685
	1.329	693.5	686	687
	1.33	693.5	688	683
	1.331	693	687.5	684
	1.332	695.5	687	685
	1.333	692	687.5	685.5
	1.334	693.5	689	687.5
	1.335	694	687.5	684
	1.336	695.5	688	684.5
	1.337	692	689.5	686
	1.338	695.5	687.5	689
	1.339	695.5	687	684
	1.34	693.5	689.5	684
	1.341	692.5	687	686
	1.342	693.5	687	690
	1.343	693.5	688	686
	1.344	695	689.5	688
	1.345	694.5	688.5	687.5
	1.346	695	689.5	690
	1.347	695	689	685.5
	1.348	692.5	688	689
	1.349	691.5	686.5	688.5
	1.35	693	690.5	690
	1.351	691.5	690.5	691
	1.352	697.5	689.5	685.5
	1.353	690.5	689.5	690
	1.354	689	690	687
	1.355	690.5	690	690.5
	1.356	690.5	694	688.5
	1.357	690.5	689.5	690
	1.358	689.5	689.5	691.5
	1.359	694	689.5	688.5
	1.36	693	687.5	686.5
	1.361	693	688.5	688.5
	1.362	687	690.5	691
	1.363	689.5	692.5	691.5
	1.364	690	691.5	695.5
	1.365	689.5	690.5	693.5
	1.366	688.5	687.5	690.5
	1.367	688.5	689	688
	1.368	687	689.5	691.5
	1.369	687.5	692.5	690.5
	1.37	691.5	688.5	693
	1.371	688	690	691.5
	1.372	685	694	692.5
	1.373	688.5	690.5	691.5
	1.374	688	692	691
	1.375	685.5	689.5	695.5
	1.376	684	690	691.5
	1.377	680.5	689.5	690.5
	1.378	683	689	691
	1.379	687	688.5	690.5
	1.38	684	692	692
	1.381	683.5	691	693
	1.382	685.5	689	690
	1.383	685.5	690.5	689.5
	1.384	688	691	694
	1.385	683.5	692	690.5
	1.386	684	691.5	690.5
	1.387	685	691	694.5
	1.388	685.5	694	690.5
	1.389	680.5	690	690
	1.39	680.5	689	690.5
	1.391	684	694	691.5
	1.392	684	691	691
	1.393	687	689.5	690.5
	1.394	684.5	690.5	692
	1.395	686	690.5	691.5
	1.396	685	690.5	690.5
	1.397	685.5	690	691
	1.398	686	688	691.5
	1.399	685.5	692	691.5
	1.4	686	691.5	688.5
	1.401	685	690.5	690
	1.402	683	692	690
	1.403	685	692.5	693.5
	1.404	684.5	691	689
	1.405	685	691.5	689.5
	1.406	687	690.5	688.5
	1.407	687	692.5	689
	1.408	685.5	691	686
	1.409	687.5	692.5	687
	1.41	686.5	691.5	687
	1.411	684	694	688
	1.412	686	690.5	689.5
	1.413	688	695.5	685.5
	1.414	690	693.5	686.5
	1.415	690	689	686
	1.416	690	695	689.5
	1.417	689	693	690.5
	1.418	689.5	692.5	689.5
	1.419	689	692	684
	1.42	690	690.5	688
	1.421	687	690	690
	1.422	690.5	690.5	687
	1.423	690	692.5	688.5
	1.424	691	692	688
	1.425	687.5	689	687
	1.426	694.5	692	688
	1.427	692.5	691.5	689.5
	1.428	691.5	691.5	689
	1.429	690.5	691.5	687.5
	1.43	693.5	691	689
	1.431	692.5	695	687
	1.432	694	688	691
	1.433	695.5	692	689
	1.434	692	688	690.5
	1.435	692.5	692	689.5
	1.436	693.5	693	690.5
	1.437	697	693	689.5
	1.438	697.5	688.5	690
	1.439	692.5	684	691.5
	1.44	694	689	688.5
	1.441	697.5	694.5	694.5
	1.442	697	690	689.5
	1.443	697	690.5	691
	1.444	697	690.5	691.5
	1.445	694.5	691	692.5
	1.446	695.5	692	690.5
	1.447	697.5	692	694
	1.448	692.5	693.5	696.5
	1.449	695.5	690	698
	1.45	694.5	690.5	691.5
	1.451	695.5	692	693.5
	1.452	695.5	694	692
	1.453	692	695	692.5
	1.454	696.5	691	693
	1.455	697	689.5	692.5
	1.456	699	686	695.5
	1.457	695.5	694	693.5
	1.458	695	690	697
	1.459	696.5	693.5	693
	1.46	695	688	694.5
	1.461	691.5	692.5	694.5
	1.462	692	690.5	694.5
	1.463	690.5	691	695.5
	1.464	693.5	690.5	697.5
	1.465	693.5	689	695.5
	1.466	691	690.5	694.5
	1.467	693.5	689.5	699
	1.468	694.5	687.5	692.5
	1.469	691	694.5	693.5
	1.47	692.5	691.5	694
	1.471	689.5	692.5	695.5
	1.472	694	689.5	694.5
	1.473	695	690.5	694.5
	1.474	693	688	695.5
	1.475	693.5	690	691.5
	1.476	692.5	695	695.5
	1.477	693	691.5	692.5
	1.478	691.5	690.5	697
	1.479	692.5	690	695
	1.48	690.5	689	694
	1.481	691.5	690.5	692.5
	1.482	691	692.5	689
	1.483	693	688.5	695
	1.484	692.5	691	690.5
	1.485	690.5	689.5	691.5
	1.486	690	693	692
	1.487	688	688.5	692
	1.488	689	688	689.5
	1.489	697.5	689	691.5
	1.49	690.5	690.5	690.5
	1.491	695	693.5	690.5
	1.492	688	689.5	692
	1.493	692.5	690	690.5
	1.494	690.5	692	690
	1.495	690.5	691.5	689
	1.496	692	688	693.5
	1.497	695	691.5	690
	1.498	695.5	688.5	691
	1.499	691	690.5	689.5
	1.5	692.5	687.5	690
	1.501	691.5	690.5	690.5
	1.502	694	692	688
	1.503	690.5	689	690
	1.504	693	690.5	691
	1.505	697.5	686.5	690.5
	1.506	693	690.5	687
	1.507	695.5	691	688
	1.508	692	690.5	687.5
	1.509	693.5	689	688
	1.51	693.5	689.5	688.5
	1.511	693.5	690	690.5
	1.512	693	689	688.5
	1.513	697.5	690.5	689.5
	1.514	692	690.5	690
	1.515	695	688.5	690.5
	1.516	697.5	692.5	687.5
	1.517	691	690	686
	1.518	695	687.5	690.5
	1.519	692.5	690.5	686.5
	1.52	697.5	686	690
	1.521	694	690	687.5
	1.522	695.5	690.5	689.5
	1.523	695.5	690.5	690
	1.524	696.5	688	690.5
	1.525	698	688	688.5
	1.526	692.5	689.5	690.5
	1.527	691.5	689	692.5
	1.528	692	687	690.5
	1.529	693	692.5	692
	1.53	695.5	687.5	689.5
	1.531	697.5	685.5	688
	1.532	694	690.5	691
	1.533	694	687.5	693.5
	1.534	694.5	686.5	690
	1.535	697.5	689	689.5
	1.536	695.5	692.5	691.5
	1.537	693.5	690	690.5
	1.538	698	686.5	691.5
	1.539	695	688	691
	1.54	695.5	686.5	691
	1.541	698.5	687.5	692.5
	1.542	697	687.5	690
	1.543	697	692.5	689.5
	1.544	695.5	688	693.5
	1.545	694	689	691
	1.546	694	687	691
	1.547	695.5	690	691
	1.548	695.5	690.5	690
	1.549	695	690	691
	1.55	693.5	688	691
	1.551	695.5	690.5	691.5
	1.552	695	689.5	693.5
	1.553	697.5	690	691
	1.554	695.5	687	690
	1.555	696.5	690.5	690
	1.556	694	687.5	690.5
	1.557	695.5	689	691
	1.558	698	689	690.5
	1.559	694	693.5	688
	1.56	695.5	690	690
	1.561	695.5	689	691
	1.562	697.5	689	690.5
	1.563	693.5	689.5	689
	1.564	695.5	688.5	690.5
	1.565	694.5	689.5	691
	1.566	691	689.5	689.5
	1.567	694	691.5	690.5
	1.568	692.5	692.5	693
	1.569	695.5	694.5	689
	1.57	697	691	690.5
	1.571	697.5	688	689
	1.572	695	690.5	688
	1.573	697.5	691	688
	1.574	697.5	690.5	690
	1.575	697.5	693.5	690.5
	1.576	698.5	687	688
	1.577	694	693	691.5
	1.578	697	692	690.5
	1.579	697.5	694	692.5
	1.58	695.5	688	686
	1.581	697.5	693	690.5
	1.582	700	692.5	690.5
	1.583	697.5	690.5	687.5
	1.584	700	691	685
	1.585	695.5	691.5	689
	1.586	702	689.5	692.5
	1.587	699	692	691.5
	1.588	697.5	692.5	692
	1.589	702	695	689.5
	1.59	702	695	690
	1.591	701.5	690	690
	1.592	701.5	694.5	690.5
	1.593	699.5	692	690
	1.594	701	694	690
	1.595	701.5	694	688.5
	1.596	701	694	687
	1.597	701.5	697	687.5
	1.598	702	692.5	691.5
	1.599	701	691.5	687
	1.6	703	695.5	690.5
	1.601	701	693.5	685.5
	1.602	700.5	690.5	689.5
	1.603	701.5	690.5	689.5
	1.604	703	692	690.5
	1.605	699.5	691	687
	1.606	699.5	694.5	688
	1.607	700	695.5	688.5
	1.608	702.5	693.5	688
	1.609	701.5	696	690
	1.61	701.5	695.5	687
	1.611	703.5	695.5	689
	1.612	705	694	689.5
	1.613	703	691.5	688.5
	1.614	702	693.5	692
	1.615	701	693	692
	1.616	705.5	695.5	689.5
	1.617	701	695	687.5
	1.618	701	695.5	692
	1.619	699.5	692	685
	1.62	700	694	691
	1.621	703.5	695	691
	1.622	703	693.5	690
	1.623	699	691.5	691.5
	1.624	698	693.5	689
	1.625	698	690.5	691
	1.626	701	690	690.5
	1.627	700	694	692
	1.628	700	693.5	690.5
	1.629	700	695.5	692
	1.63	699	691.5	691.5
	1.631	698.5	692	691
	1.632	699	691	693.5
	1.633	701	691.5	694
	1.634	695.5	690.5	688
	1.635	700.5	693.5	688
	1.636	695.5	689	688
	1.637	699	688.5	691.5
	1.638	698	690	692
	1.639	698	688.5	693
	1.64	696.5	691.5	688
	1.641	701	688.5	693
	1.642	699.5	691.5	693.5
	1.643	699.5	690.5	691.5
	1.644	698.5	691	690.5
	1.645	698	691	693.5
	1.646	695.5	691.5	691.5
	1.647	697.5	686.5	689.5
	1.648	695.5	689.5	695.5
	1.649	697.5	690.5	695.5
	1.65	697.5	686	695
	1.651	693	685.5	694
	1.652	694	687.5	692
	1.653	695	691.5	688.5
	1.654	694	689	695
	1.655	695.5	690	694
	1.656	695	687.5	695.5
	1.657	692.5	685.5	694
	1.658	695	686.5	692
	1.659	694	685.5	695.5
	1.66	695	686.5	691.5
	1.661	695.5	689.5	695.5
	1.662	695	688	695.5
	1.663	695.5	687	697.5
	1.664	696.5	686.5	696.5
	1.665	699	688	692
	1.666	692.5	687	698.5
	1.667	695.5	686.5	694.5
	1.668	695.5	689.5	696
	1.669	697	688	694
	1.67	694	687.5	693
	1.671	697	685	693.5
	1.672	695.5	686	694
	1.673	693.5	687.5	694.5
	1.674	694.5	690.5	695.5
	1.675	694	688	695.5
	1.676	695.5	688	694
	1.677	693	687	695
	1.678	694.5	688	695.5
	1.679	690	689	696.5
	1.68	690.5	687.5	697
	1.681	691	689	694
	1.682	693.5	686.5	697
	1.683	693.5	690	692.5
	1.684	691.5	684.5	695.5
	1.685	692.5	687	695.5
	1.686	690.5	691.5	693.5
	1.687	687.5	685.5	697.5
	1.688	695.5	688.5	697.5
	1.689	692.5	689	692.5
	1.69	690.5	688.5	695.5
	1.691	688	688	692.5
	1.692	686.5	689.5	694.5
	1.693	686	687	691.5
	1.694	691	685.5	691.5
	1.695	690.5	690	691.5
	1.696	690.5	689	693.5
	1.697	686.5	693.5	695
	1.698	688	690	690.5
	1.699	686.5	690.5	693
	1.7	685.5	690.5	691
	1.701	685.5	687	692.5
	1.702	685.5	692	690.5
	1.703	680	692.5	690.5
	1.704	680.5	693	693.5
	1.705	680.5	694	691.5
	1.706	677	695.5	690.5
	1.707	677	688.5	690.5
	1.708	677	695.5	688
	1.709	674.5	692	693
	1.71	675.5	695.5	689.5
	1.711	669.5	695.5	690.5
	1.712	675	692	688.5
	1.713	670.5	694	689.5
	1.714	669.5	697	690
	1.715	665.5	697.5	686
	1.716	665.5	695.5	688
	1.717	662	693	685.5
	1.718	663	692	689.5
	1.719	659	695.5	689
	1.72	657	695.5	688
	1.721	658.5	697.5	688.5
	1.722	650.5	694	690.5
	1.723	650.5	692.5	687.5
	1.724	650.5	693.5	688
	1.725	647.5	695	689.5
	1.726	643	694	690.5
	1.727	641.5	693	689.5
	1.728	638	692	692.5
	1.729	634	693	690.5
	1.73	634	692	692
	1.731	636	692	689.5
	1.732	626.5	695.5	688.5
	1.733	624.5	691.5	690.5
	1.734	626.5	691	690
	1.735	621	690.5	690.5
	1.736	621	692	688
	1.737	617	690.5	691.5
	1.738	616	690	690.5
	1.739	618.5	692	692.5
	1.74	611	692.5	691.5
	1.741	610.5	692	689
	1.742	610	690.5	691
	1.743	608	692.5	689
	1.744	604	692	690.5
	1.745	601.5	691	688.5
	1.746	603.5	689.5	690
	1.747	597	691.5	689
	1.748	599.5	690	688
	1.749	598	688.5	689.5
	1.75	595.5	690	689
	1.751	594.5	686.5	685
	1.752	590.5	688	688
	1.753	590.5	687.5	689.5
	1.754	586.5	689	691.5
	1.755	586	687	688
	1.756	582.5	686.5	690
	1.757	584	687.5	687.5
	1.758	582.5	691	689
	1.759	576	684	688
	1.76	575.5	685.5	691
	1.761	578.5	686.5	689
	1.762	572	688.5	687
	1.763	575	690.5	687.5
	1.764	572.5	690	688
	1.765	568.5	687	686
	1.766	567.5	688	688
	1.767	561	687.5	689
	1.768	558.5	690	687
	1.769	560.5	687.5	687
	1.77	559.5	688.5	685
	1.771	558	689	689.5
	1.772	554	692.5	687
	1.773	550.5	691	688
	1.774	550.5	688.5	687
	1.775	549	687.5	685.5
	1.776	550.5	690.5	687
	1.777	546.5	688	688
	1.778	543.5	690.5	687
	1.779	540.5	689.5	688
	1.78	536.5	691.5	684
	1.781	533	691.5	687
	1.782	532.5	692.5	686
	1.783	533.5	690.5	685
	1.784	531.5	692.5	685
	1.785	527	687.5	687
	1.786	524.5	695.5	689
	1.787	521	691.5	686
	1.788	519	690.5	684.5
	1.789	518.5	693.5	686
	1.79	514.5	694.5	685
	1.791	510.5	695.5	686.5
	1.792	508.5	694.5	687.5
	1.793	501.5	691.5	680.5
	1.794	499	697.5	685
	1.795	496.5	695	685
	1.796	496	695	687.5
	1.797	490	692.5	686.5
	1.798	485.5	697	684
	1.799	482	695.5	684
	1.8	474	694	685.5
	1.801	469	696.5	685
	1.802	466.5	693	687.5
	1.803	461.5	695.5	684.5
	1.804	459.5	697	687
	1.805	451	695.5	684
	1.806	444.5	695	685
	1.807	440	695.5	684.5
	1.808	436	695.5	687.5
	1.809	430.5	697.5	685.5
	1.81	424	695	685
	1.811	415	697	685
	1.812	410	694.5	688.5
	1.813	405	697.5	689.5
	1.814	396.5	695.5	688.5
	1.815	396	694.5	685.5
	1.816	387.5	696.5	684.5
	1.817	380.5	695.5	688
	1.818	370.5	696.5	687.5
	1.819	362.5	695.5	688
	1.82	359.5	693.5	689.5
	1.821	352	697	686
	1.822	350.5	695.5	690
	1.823	342	691.5	690
	1.824	333.5	694	691
	1.825	324.5	695.5	688.5
	1.826	319.5	690	690.5
	1.827	315	694	690.5
	1.828	308	695.5	687
	1.829	303	693.5	688.5
	1.83	298	695.5	690.5
	1.831	289	691.5	694.5
	1.832	284	692.5	692.5
	1.833	281.5	694.5	692.5
	1.834	273.5	692.5	693.5
	1.835	269	689.5	690.5
	1.836	265	693	694.5
	1.837	259.5	690.5	691.5
	1.838	254.5	691	693
	1.839	246.5	690	690.5
	1.84	243.5	692	692
	1.841	239	688	693.5
	1.842	236.5	692	692
	1.843	228.5	689.5	691.5
	1.844	223	691	696.5
	1.845	220	686.5	693
	1.846	214.5	690.5	695
	1.847	209.5	692	691
	1.848	205.5	685.5	691.5
	1.849	202	689	694.5
	1.85	196	689	693.5
	1.851	191.5	690.5	693
	1.852	191	686.5	694
	1.853	184.5	686	692.5
	1.854	181	685.5	694
	1.855	178.5	686.5	695.5
	1.856	174	687.5	695.5
	1.857	172.5	688	696.5
	1.858	168	684.5	696.5
	1.859	168	687.5	695.5
	1.86	168.5	686.5	700
	1.861	162	688	694.5
	1.862	158.5	690	695.5
	1.863	156.5	684.5	696.5
	1.864	154	685	697.5
	1.865	151.5	688.5	697
	1.866	149.5	688	694.5
	1.867	149.5	687.5	697.5
	1.868	147.5	684.5	700.5
	1.869	145.5	690.5	699.5
	1.87	144.5	687	695.5
	1.871	141	690	695.5
	1.872	143.5	688	698.5
	1.873	142.5	686.5	698
	1.874	139	685	700
	1.875	139.5	689	698
	1.876	136.5	689	697.5
	1.877	135.5	690.5	699.5
	1.878	136	690.5	697.5
	1.879	136	690.5	695
	1.88	134.5	687.5	698
	1.881	139	689	699
	1.882	139	692.5	699.5
	1.883	135.5	690.5	702.5
	1.884	136.5	690.5	700
	1.885	136	690.5	698
	1.886	135.5	692.5	701
	1.887	136	693.5	702.5
	1.888	134.5	693.5	703
	1.889	136	693.5	701.5
	1.89	136	695.5	703.5
	1.891	138	693.5	700
	1.892	135.5	694.5	697.5
	1.893	137.5	695	699
	1.894	138.5	693.5	698.5
	1.895	140	697.5	701
	1.896	139	695.5	700
	1.897	138.5	696.5	698
	1.898	139.5	695.5	696.5
	1.899	143	696	697.5
	1.9	143.5	699	699
	1.901	142	695.5	693.5
	1.902	148.5	697.5	695
	1.903	147.5	699.5	695.5
	1.904	149	697.5	697
	1.905	151.5	702.5	695
	1.906	151.5	695.5	697.5
	1.907	150	699.5	695
	1.908	155.5	703.5	695.5
	1.909	156	700	696.5
	1.91	160.5	698.5	696.5
	1.911	162.5	700.5	695.5
	1.912	165.5	701	695.5
	1.913	167	704	695.5
	1.914	170	697.5	693
	1.915	175	701.5	697.5
	1.916	176	698.5	697
	1.917	178	700.5	695.5
	1.918	182.5	700	695.5
	1.919	190.5	701	694.5
	1.92	191	700	694.5
	1.921	195	704.5	690.5
	1.922	195	702.5	694.5
	1.923	201	704	691.5
	1.924	203.5	703	693.5
	1.925	206.5	704.5	694.5
	1.926	214.5	703	695.5
	1.927	221	704.5	692.5
	1.928	225.5	704.5	693
	1.929	233	706.5	691
	1.93	237.5	704.5	692.5
	1.931	247.5	706	692
	1.932	253	706.5	694
	1.933	260.5	708.5	693.5
	1.934	267	704.5	690.5
	1.935	274	705	695.5
	1.936	285	707.5	691.5
	1.937	292	707	695.5
	1.938	299	706.5	694.5
	1.939	307.5	704.5	693
	1.94	313.5	704.5	691
	1.941	318.5	704.5	693.5
	1.942	326	706.5	693.5
	1.943	330.5	703	694.5
	1.944	339	705.5	695
	1.945	344.5	707.5	693
	1.946	347	703	695
	1.947	355.5	705	695.5
	1.948	361.5	707	695.5
	1.949	364.5	705	695.5
	1.95	371	704.5	693.5
	1.951	376	705.5	695
	1.952	381	705.5	695
	1.953	385	708.5	693.5
	1.954	388.5	705.5	698
	1.955	392	704.5	695.5
	1.956	399	704	700
	1.957	403.5	702.5	697.5
	1.958	406	706.5	701.5
	1.959	417.5	708	699.5
	1.96	417	706	702
	1.961	422.5	703	699.5
	1.962	424.5	710.5	701.5
	1.963	429	707.5	698
	1.964	436.5	704.5	700
	1.965	441	708	702.5
	1.966	441	708.5	702
	1.967	452.5	706.5	699.5
	1.968	452	707	703.5
	1.969	455.5	709.5	703
	1.97	462	709.5	705.5
	1.971	466.5	707.5	703.5
	1.972	467.5	710.5	702
	1.973	475	710.5	703.5
	1.974	478.5	707.5	701.5
	1.975	485	710.5	703
	1.976	485.5	713.5	702.5
	1.977	488.5	713	704
	1.978	496	710.5	701
	1.979	501.5	710.5	703
	1.98	506	710.5	703
	1.981	507.5	718	700.5
	1.982	508.5	710.5	701
	1.983	516.5	710.5	699.5
	1.984	519.5	710.5	701.5
	1.985	525	711.5	701
	1.986	528.5	710.5	699
	1.987	531	708.5	698.5
	1.988	538	710.5	699.5
	1.989	540	715.5	698.5
	1.99	540.5	710.5	699
	1.991	549.5	710.5	697.5
	1.992	548.5	709.5	697.5
	1.993	554	710	695.5
[truncated: 6,006 more rows]

## Sheet: C
DataTypeVer2.0	Time	Fz	Fz	Fz
NumberOfData		15000	15000	15000
PreTriggerData		0	0	0
SamplingTime[ms]		1	1	1
DataLabel		AB1:CMJ	AB2:CMJ	AB3:CMJ
DataUnit	sec	N	N	N
	0	696.5	697.5	694
	0.001	697.5	696.5	695
	0.002	696.5	697.5	695
	0.003	696	700	694
	0.004	694	696.5	697.5
	0.005	697.5	697.5	693
	0.006	697.5	697	692.5
	0.007	698	697.5	696
	0.008	697	692.5	697.5
	0.009	696.5	696.5	695
	0.01	695.5	697	694
	0.011	696.5	695	695
	0.012	699	695.5	693
	0.013	697.5	697.5	692.5
	0.014	697	693.5	695.5
	0.015	695	695.5	695.5
	0.016	698	695	695.5
	0.017	697.5	694.5	695.5
	0.018	698.5	695	693.5
	0.019	698	695	695.5
	0.02	700	694	690.5
	0.021	697.5	695.5	694
	0.022	697.5	695.5	694.5
	0.023	699.5	697.5	692.5
	0.024	696.5	693	692.5
	0.025	696	696	693
	0.026	696.5	698	692
	0.027	697	696	695.5
	0.028	699.5	692	695
	0.029	696.5	697	694
	0.03	695	692.5	690.5
	0.031	700.5	696.5	691.5
	0.032	695.5	697.5	691.5
	0.033	700	696	695
	0.034	695.5	696.5	693
	0.035	699.5	694.5	693.5
	0.036	695.5	694	695.5
	0.037	698	698	690.5
	0.038	697.5	695.5	691
	0.039	699.5	697.5	693.5
	0.04	697	693	692
	0.041	701	699	696
	0.042	696	697	695.5
	0.043	697.5	697.5	697.5
	0.044	697.5	695.5	690.5
	0.045	697	694	693
	0.046	697.5	694.5	692
	0.047	700.5	696.5	695
	0.048	697.5	695	692.5
	0.049	697.5	699	693
	0.05	695.5	697.5	694
	0.051	699	696.5	694.5
	0.052	697.5	697	693
	0.053	700	697	695
	0.054	697.5	697.5	695
	0.055	699.5	697.5	695
	0.056	697.5	696	695
	0.057	697.5	696.5	694
	0.058	697.5	694	695
	0.059	699	698.5	695.5
	0.06	698.5	697.5	693.5
	0.061	700.5	697.5	696.5
	0.062	696.5	695.5	693.5
	0.063	695	697.5	694
	0.064	697	695.5	697
	0.065	699	691	696
	0.066	699.5	694	696
	0.067	695.5	695.5	695.5
	0.068	696	698.5	692.5
	0.069	699	694	697
	0.07	697	699.5	695.5
	0.071	697.5	693.5	695
	0.072	694	694	694.5
	0.073	695.5	697.5	695.5
	0.074	698	696	695.5
	0.075	693.5	696	699.5
	0.076	697	697.5	697.5
	0.077	698	696	696
	0.078	696	695	693.5
	0.079	696	693	698.5
	0.08	698	697.5	697.5
	0.081	697	693.5	694
	0.082	695.5	695.5	693.5
	0.083	698	694.5	695
	0.084	695.5	692.5	698
	0.085	699.5	693.5	698
	0.086	698.5	695.5	695.5
	0.087	694	695	694
	0.088	700.5	696	692.5
	0.089	696.5	695	697.5
	0.09	695.5	694	697.5
	0.091	697	695	697.5
	0.092	697	697.5	697.5
	0.093	697	694	696.5
	0.094	696.5	691.5	695.5
	0.095	694	694	697
	0.096	695.5	692	696.5
	0.097	698	696	698.5
	0.098	696.5	693	697
	0.099	697.5	696	695.5
	0.1	699.5	697.5	697.5
	0.101	697	694.5	698.5
	0.102	697.5	691.5	696.5
	0.103	691.5	693.5	697.5
	0.104	697.5	692.5	697.5
	0.105	698	695	696.5
	0.106	700	696.5	697
	0.107	696	691.5	695
	0.108	697.5	695	697.5
	0.109	700	696	696.5
	0.11	694	695	700
	0.111	699	695.5	694.5
	0.112	701.5	694	696
	0.113	697	694.5	697.5
	0.114	699	695.5	699
	0.115	696	695	697.5
	0.116	700.5	696	697.5
	0.117	697	693.5	698
	0.118	696.5	693.5	698.5
	0.119	698	696	696.5
	0.12	695.5	694	696.5
	0.121	700.5	696.5	701.5
	0.122	699	695	697.5
	0.123	698.5	692	697.5
	0.124	700	694	697
	0.125	697	691.5	697
	0.126	698.5	696	697.5
	0.127	697	696	699.5
	0.128	697	694	700.5
	0.129	700	695	697
	0.13	697	694	698.5
	0.131	697	693.5	700
	0.132	696	696	699
	0.133	695.5	694	699.5
	0.134	697	696.5	700.5
	0.135	701.5	697	699
	0.136	697.5	697.5	698
	0.137	696.5	696	700
	0.138	697	696.5	701.5
	0.139	695	694	699
	0.14	697.5	695	698.5
	0.141	697.5	694.5	697.5
	0.142	699.5	695.5	700.5
	0.143	694	697	697.5
	0.144	700.5	694.5	699.5
	0.145	694.5	698	698.5
	0.146	694	693.5	700.5
	0.147	697.5	694	698
	0.148	701	691	699
	0.149	698.5	692.5	696.5
	0.15	699	697	701.5
	0.151	696.5	695	701.5
	0.152	696	691.5	699
	0.153	694	693	697.5
	0.154	697.5	692.5	701.5
	0.155	693.5	691.5	701.5
	0.156	697	692	697
	0.157	696	694	701
	0.158	697.5	691.5	700.5
	0.159	697.5	693.5	699
	0.16	699	691.5	698.5
	0.161	697.5	694	698.5
	0.162	696	696	701.5
	0.163	697.5	692	701.5
	0.164	697.5	696	699.5
	0.165	698.5	696	701.5
	0.166	697	695	701.5
	0.167	697	693	700.5
	0.168	695.5	695	699.5
	0.169	696.5	695	701.5
	0.17	697	695	698
	0.171	699	692.5	697.5
	0.172	696	695	699
	0.173	694	692	699.5
	0.174	697.5	697	699
	0.175	696	696.5	697
	0.176	696.5	695	698.5
	0.177	694.5	693	697.5
	0.178	696	697	699
	0.179	696	695.5	701
	0.18	697	699.5	700.5
	0.181	695	692.5	701
	0.182	699.5	697.5	696.5
	0.183	697	693.5	699
	0.184	697	695.5	700
	0.185	697	693.5	698.5
	0.186	696.5	694.5	700
	0.187	699.5	699.5	699.5
	0.188	699	694	700
	0.189	697.5	697	700
	0.19	697	696	696
	0.191	699.5	696.5	698.5
	0.192	696.5	699	699.5
	0.193	698	698.5	698
	0.194	695.5	695.5	698
	0.195	696	699	699.5
	0.196	695.5	694.5	700
	0.197	698.5	698	700
	0.198	697	696.5	697.5
	0.199	699	700.5	696
	0.2	695.5	698	701
	0.201	700.5	696.5	700
	0.202	694.5	696	699.5
	0.203	697.5	694	699
	0.204	697.5	697	700.5
	0.205	697.5	698	697
	0.206	697.5	697	698.5
	0.207	697.5	697	696.5
	0.208	700	697	699
	0.209	697.5	700	696
	0.21	696	696	697.5
	0.211	697.5	697.5	698.5
	0.212	698.5	698	695.5
	0.213	698	697	692.5
	0.214	701	697.5	692
	0.215	699	698.5	697
	0.216	700	698.5	694
	0.217	697	696.5	694
	0.218	697.5	697.5	691.5
	0.219	697	698	694.5
	0.22	697.5	697.5	695
	0.221	698.5	698	695
	0.222	696.5	697.5	691.5
	0.223	698	699.5	695.5
	0.224	696.5	699.5	692
	0.225	700.5	698	695
	0.226	698.5	697.5	691.5
	0.227	695	700	696.5
	0.228	697	698	696.5
	0.229	697	701.5	695.5
	0.23	700	701	694.5
	0.231	697.5	700	697.5
	0.232	698.5	699	693.5
	0.233	700	701.5	691
	0.234	696	698.5	691
	0.235	696	699.5	693
	0.236	697	697.5	691
	0.237	696.5	697	697.5
	0.238	700	698.5	694
	0.239	696.5	697	692
	0.24	697	696.5	693.5
	0.241	698.5	697	698.5
	0.242	696	697	695
	0.243	697	697.5	697
	0.244	699	697	699.5
	0.245	696	696	696.5
	0.246	698	699	693
	0.247	696.5	694	694.5
	0.248	697.5	697	697
	0.249	699.5	697.5	697.5
	0.25	699	697.5	694
	0.251	697	697.5	694.5
	0.252	699	697.5	697.5
	0.253	698	697	694
	0.254	696.5	696.5	697.5
	0.255	697.5	697	697
	0.256	697.5	700	698.5
	0.257	697.5	698.5	698
	0.258	696.5	699.5	697.5
	0.259	700.5	696	693.5
	0.26	698.5	694	694.5
	0.261	695.5	701.5	694.5
	0.262	698.5	697.5	695.5
	0.263	696.5	699	697.5
	0.264	697.5	700	697
	0.265	697.5	700.5	693.5
	0.266	698.5	697.5	697.5
	0.267	697	694	694
	0.268	700.5	696	697.5
	0.269	698	696.5	697.5
	0.27	700	698	697.5
	0.271	698.5	695	696
	0.272	697.5	694.5	696.5
	0.273	700.5	696.5	697.5
	0.274	699.5	696	695.5
	0.275	699	695	693.5
	0.276	698	697	691
	0.277	698.5	696	696
	0.278	697.5	696	696.5
	0.279	695.5	692	694
	0.28	697	695.5	690.5
	0.281	701	697	697
	0.282	697.5	694.5	691
	0.283	697	697.5	693
	0.284	701.5	697.5	695
	0.285	699.5	696	693
	0.286	698	698	696
	0.287	699	699	693
	0.288	697	698	693.5
	0.289	695.5	697.5	694
	0.29	697	697.5	695.5
	0.291	701.5	694	693
	0.292	698.5	696	695.5
	0.293	697.5	698.5	691.5
	0.294	701.5	696	694
	0.295	701.5	700.5	695.5
	0.296	700.5	696	693.5
	0.297	697.5	696	692.5
	0.298	697.5	696	693.5
	0.299	699.5	697.5	694
	0.3	700.5	697.5	692.5
	0.301	697.5	698	689.5
	0.302	700.5	697.5	692
	0.303	699.5	693.5	692.5
	0.304	697.5	697.5	691
	0.305	698.5	695	690.5
	0.306	699.5	697.5	693.5
	0.307	697.5	695.5	692
	0.308	701.5	697.5	693
	0.309	701.5	696.5	692.5
	0.31	698	697	688.5
	0.311	698.5	696.5	694
	0.312	697.5	699	693
	0.313	701.5	696	692.5
	0.314	698	696.5	692.5
	0.315	699.5	693	690.5
	0.316	699	697.5	690.5
	0.317	701.5	695	692.5
	0.318	699.5	696.5	693.5
	0.319	700.5	698	692.5
	0.32	700.5	698.5	692
	0.321	697.5	697	689
	0.322	698.5	697.5	690.5
	0.323	701.5	697	688
	0.324	701	697.5	693.5
	0.325	701.5	697.5	689.5
	0.326	701.5	698	688.5
	0.327	699.5	701.5	690.5
	0.328	699.5	701	691.5
	0.329	697.5	697.5	690
	0.33	701	698	688.5
	0.331	701.5	694	691.5
	0.332	701.5	694.5	690
	0.333	700.5	698.5	686.5
	0.334	700.5	701	690.5
	0.335	699	698	694
	0.336	701	698	691.5
	0.337	701.5	701.5	691
	0.338	700	696	691
	0.339	699	699	693
	0.34	700.5	695.5	694
	0.341	699	697.5	692.5
	0.342	700.5	696.5	692
	0.343	697.5	700	692.5
	0.344	701.5	698	690
	0.345	700	697.5	691.5
	0.346	700	697.5	691.5
	0.347	701.5	698.5	692.5
	0.348	699	697.5	691.5
	0.349	700.5	699.5	695
	0.35	697.5	698	690
	0.351	699.5	694.5	691
	0.352	698	697	694
	0.353	697.5	698.5	693
	0.354	701.5	696	692
	0.355	700	699	693.5
	0.356	700.5	700	693
	0.357	697.5	699.5	694.5
	0.358	700.5	697	694
	0.359	699	694.5	692
	0.36	700.5	699.5	693.5
	0.361	697.5	696.5	692.5
	0.362	697.5	697.5	692
	0.363	695.5	697	694
	0.364	699.5	696	693.5
	0.365	699.5	695	694
	0.366	697.5	696	695
	0.367	697	696	693
	0.368	693.5	694.5	697.5
	0.369	698	694.5	694
	0.37	697.5	694	696.5
	0.371	699	695	694
	0.372	698.5	695.5	696.5
	0.373	698.5	700	699.5
	0.374	695	696	694
	0.375	696.5	697.5	697
	0.376	693	695.5	696
	0.377	697	694	696
	0.378	699	696.5	697.5
	0.379	695	694	697.5
	0.38	695.5	694	699
	0.381	697.5	693	698
	0.382	697	696	696
	0.383	699.5	695	701
	0.384	697	696.5	697.5
	0.385	698.5	696	699.5
	0.386	696	698	698
	0.387	697.5	693.5	698
	0.388	695	695.5	697.5
	0.389	697.5	698	701
	0.39	695.5	696.5	697.5
	0.391	696	695.5	699
	0.392	698.5	694	697.5
	0.393	694.5	692.5	696
	0.394	696	697	698.5
	0.395	697	697	697.5
	0.396	697.5	697.5	697.5
	0.397	695	692.5	698.5
	0.398	697.5	698	701.5
	0.399	700.5	698.5	701.5
	0.4	697.5	698	694.5
	0.401	697	697	698.5
	0.402	699.5	696	698
	0.403	697	694	697.5
	0.404	695	695.5	700.5
	0.405	693.5	697	700.5
	0.406	699	700	696.5
	0.407	695.5	694	701.5
	0.408	699	697.5	698
	0.409	700.5	697	698
	0.41	697	695	697
	0.411	694	696	698.5
	0.412	700.5	698	701.5
	0.413	697	697.5	698
	0.414	694.5	695	696.5
	0.415	697.5	699.5	700.5
	0.416	697.5	696	699.5
	0.417	697.5	697	699.5
	0.418	697.5	697	699.5
	0.419	699	696	700
	0.42	698.5	700	698.5
	0.421	696	693	698.5
	0.422	701	697	700.5
	0.423	695	698	701.5
	0.424	696	697.5	701
	0.425	698.5	694.5	698
	0.426	698	698	699.5
	0.427	701.5	696	700.5
	0.428	696.5	698	700
	0.429	697.5	701	699
	0.43	698.5	695.5	695
	0.431	700	697.5	700.5
	0.432	696	697.5	697
	0.433	697	695	699
	0.434	700.5	697.5	698.5
	0.435	697.5	699	699
	0.436	697.5	697.5	699
	0.437	695.5	695.5	697.5
	0.438	697.5	696.5	698.5
	0.439	700	696	698.5
	0.44	698	700	699.5
	0.441	697.5	697.5	700
	0.442	699.5	695	700
	0.443	696	698	697.5
	0.444	699	695	699.5
	0.445	699	698	699.5
	0.446	700.5	697.5	697
	0.447	696.5	695	698.5
	0.448	698.5	699	695
	0.449	698	696	698.5
	0.45	700	694.5	698.5
	0.451	698.5	695	695
	0.452	701.5	696.5	696.5
	0.453	698.5	695.5	697
	0.454	701.5	698.5	698
	0.455	701.5	697	695
	0.456	697.5	696.5	697
	0.457	701	694.5	696.5
	0.458	699	697	696
	0.459	697	698	696
	0.46	699	696.5	696
	0.461	700	699.5	695.5
	0.462	697.5	695	691.5
	0.463	701	696.5	692.5
	0.464	701.5	697.5	695.5
	0.465	698	697.5	696
	0.466	700.5	695.5	696
	0.467	699.5	696	694
	0.468	700.5	697	696
	0.469	701.5	697	692
	0.47	701.5	695.5	696
	0.471	701	693.5	694
	0.472	701.5	700.5	693.5
	0.473	700.5	696	694
	0.474	700.5	697	696
	0.475	700.5	699.5	690
	0.476	701.5	697.5	694.5
	0.477	697.5	696.5	693
	0.478	698.5	697.5	693.5
	0.479	700	695.5	694.5
	0.48	700	696	694
	0.481	698	697	692.5
	0.482	697	695.5	693
	0.483	700.5	695.5	695
	0.484	701.5	701.5	694
	0.485	698.5	696	694
	0.486	698	696	691.5
	0.487	699	698.5	696
	0.488	699	694	693
	0.489	696.5	697.5	697.5
	0.49	699.5	696.5	696.5
	0.491	697.5	696.5	696.5
	0.492	698.5	695.5	695
	0.493	700	695	695.5
	0.494	697.5	695	694.5
	0.495	699	697	697.5
	0.496	697.5	694.5	697.5
	0.497	699.5	697.5	697.5
	0.498	695.5	697	694.5
	0.499	697.5	696.5	697.5
	0.5	697.5	694.5	700.5
	0.501	697	694	697
	0.502	697	697.5	693
	0.503	696	693	696.5
	0.504	698.5	694	694
	0.505	698.5	694	697
	0.506	697.5	696	698.5
	0.507	699	694	697
	0.508	698.5	695.5	700
	0.509	700	694	696.5
	0.51	696.5	692.5	697.5
	0.511	699.5	697.5	696
	0.512	698.5	694.5	695.5
	0.513	695.5	697.5	697.5
	0.514	696	695.5	699
	0.515	696.5	699	696
	0.516	693	697.5	699.5
	0.517	697.5	697	697.5
	0.518	695.5	694	697
	0.519	697	697.5	699
	0.52	696.5	699	696
	0.521	695	698	697
	0.522	699	696	698
	0.523	695.5	695	697.5
	0.524	695.5	696	698.5
	0.525	695	697	699
	0.526	696.5	693	698
	0.527	696.5	697.5	697.5
	0.528	696.5	695.5	699
	0.529	697	695	697.5
	0.53	698	697	698.5
	0.531	695	699	697.5
	0.532	697	693.5	699
	0.533	695.5	694.5	698
	0.534	694.5	696	697
	0.535	695.5	696.5	698
	0.536	695	691	698.5
	0.537	695.5	693.5	701
	0.538	696	696.5	699
	0.539	697	693	698.5
	0.54	696	694	699
	0.541	697.5	696.5	699.5
	0.542	696.5	695.5	699
	0.543	697.5	697	700.5
	0.544	692	693.5	700
	0.545	695	695.5	700.5
	0.546	695	696	696
	0.547	697.5	698	698.5
	0.548	695.5	694.5	699.5
	0.549	693.5	697.5	700
	0.55	692.5	695.5	697.5
	0.551	696	697	696.5
	0.552	696.5	697.5	701.5
	0.553	694	698.5	698
	0.554	697	696.5	698
	0.555	695	696.5	699
	0.556	697	697.5	694
	0.557	694.5	696	697
	0.558	695	697	699
	0.559	697	697	699
	0.56	697.5	697.5	700
	0.561	697.5	696	697.5
	0.562	695	699	697
	0.563	693.5	699	699.5
	0.564	696	697.5	698.5
	0.565	694	699	700
	0.566	694	700.5	698
	0.567	693.5	696	695
	0.568	693.5	695.5	698
	0.569	698.5	697.5	696.5
	0.57	695	699	697.5
	0.571	696.5	698.5	698.5
	0.572	693	698.5	695
	0.573	694	696.5	694
	0.574	696.5	698	697.5
	0.575	696.5	699	697
	0.576	698	696	700
	0.577	695.5	698	698.5
	0.578	696	697	697.5
	0.579	693.5	700.5	697.5
	0.58	695	697.5	696.5
	0.581	695.5	699.5	696
	0.582	697.5	700	697.5
	0.583	696.5	699.5	697.5
	0.584	694	699	697.5
	0.585	695	701	694
	0.586	698	697.5	695.5
	0.587	694	700	694.5
	0.588	697.5	697.5	696.5
	0.589	696.5	700.5	695
	0.59	695.5	700	697
	0.591	693.5	696.5	694
	0.592	696	698	698
	0.593	698.5	694.5	697.5
	0.594	697.5	697	697.5
	0.595	697.5	695	695
	0.596	694.5	698	697.5
	0.597	697	697	696.5
	0.598	694	697	698
	0.599	696.5	696	694
	0.6	695	697	696.5
	0.601	698	693.5	694
	0.602	691	697.5	695.5
	0.603	695	699.5	697
	0.604	698.5	696	695
	0.605	694	695	695.5
	0.606	697.5	697	696
	0.607	698	697	694
	0.608	697.5	696	696
	0.609	693	696.5	694.5
	0.61	694	694.5	696.5
	0.611	697	701.5	697
	0.612	696	694	694
	0.613	699.5	694	695.5
	0.614	697.5	694	692.5
	0.615	694	693	698
	0.616	695	697.5	692.5
	0.617	698	697.5	696.5
	0.618	693.5	696	696
	0.619	697	690.5	695.5
	0.62	697.5	695	692.5
	0.621	698.5	693.5	694.5
	0.622	696.5	691.5	696
	0.623	695.5	693	694
	0.624	694.5	694	699
	0.625	695.5	700.5	695.5
	0.626	698	693.5	694
	0.627	699.5	697	696.5
	0.628	696	689	695.5
	0.629	696	694.5	694.5
	0.63	701	695	700
	0.631	698.5	691	694
	0.632	697.5	692.5	696.5
	0.633	699.5	692	695.5
	0.634	697	691	697.5
	0.635	701	696.5	697.5
	0.636	700.5	691.5	700
	0.637	700.5	690.5	696
	0.638	701	693	697
	0.639	698.5	693.5	692.5
	0.64	700	692	696
	0.641	698.5	697	697
	0.642	697.5	691	699
	0.643	701.5	691.5	696
	0.644	701.5	693.5	692.5
	0.645	699.5	697	697
	0.646	699.5	692	701.5
	0.647	704	694.5	698
	0.648	701	693	699
	0.649	700.5	690.5	699.5
	0.65	700	695	697.5
	0.651	700.5	692	698.5
	0.652	700	693.5	697.5
	0.653	701.5	695.5	696.5
	0.654	701	694.5	696.5
	0.655	700	691.5	694
	0.656	701.5	692.5	698
	0.657	701.5	694	695
	0.658	701.5	694	697
	0.659	701.5	693	696
	0.66	705	692	698.5
	0.661	701.5	695	695
	0.662	701.5	695	698.5
	0.663	701.5	692.5	694
	0.664	700.5	693	697.5
	0.665	700.5	696.5	692.5
	0.666	699	694	697.5
	0.667	701.5	695.5	698
	0.668	701	694.5	699
	0.669	700	692.5	696
	0.67	699	695.5	698.5
	0.671	701.5	694	697.5
	0.672	699.5	693.5	699
	0.673	697	696.5	697
	0.674	698.5	695.5	698.5
	0.675	701	697.5	697.5
	0.676	699.5	696.5	696
	0.677	701	697.5	699
	0.678	699	697	695.5
	0.679	698	693.5	698
	0.68	700	692.5	700.5
	0.681	699.5	694	699
	0.682	700	694.5	698.5
	0.683	698	696	701
	0.684	697.5	695.5	699.5
	0.685	699.5	697.5	692
	0.686	695	696	699.5
	0.687	696.5	693	700.5
	0.688	697.5	695	699.5
	0.689	697.5	696.5	699
	0.69	697.5	698.5	696.5
	0.691	697.5	694	698.5
	0.692	697	695	700
	0.693	698.5	695.5	700.5
	0.694	694	694	698.5
	0.695	700.5	696	696
	0.696	695.5	694	696
	0.697	695.5	694.5	697.5
	0.698	698.5	697	697.5
	0.699	695.5	696.5	697.5
	0.7	698	697	698.5
	0.701	698	694.5	699
	0.702	696	695	700.5
	0.703	697.5	696.5	698
	0.704	699	695.5	699
	0.705	696	694	692.5
	0.706	697	693	697.5
	0.707	695	696	697
	0.708	692.5	697	698.5
	0.709	694	697.5	699
	0.71	697.5	698.5	697
	0.711	695.5	697	699.5
	0.712	697.5	696.5	699
	0.713	692.5	697	697.5
	0.714	696.5	696	699.5
	0.715	697.5	693.5	698
	0.716	697.5	695.5	697
	0.717	697	696.5	701.5
	0.718	694	695	698.5
	0.719	696	696.5	696
	0.72	697	696	696
	0.721	696	697	695
	0.722	695	697	697
	0.723	698	692	698.5
	0.724	697	697.5	699
	0.725	691.5	695	697
	0.726	691.5	697.5	697
	0.727	695	698	699
	0.728	695.5	697.5	699
	0.729	696.5	696.5	698
	0.73	700	693.5	701.5
	0.731	697.5	697.5	698
	0.732	695	700	698.5
	0.733	692	699	697
	0.734	695.5	697.5	700
	0.735	697.5	698.5	697.5
	0.736	697.5	694.5	697.5
	0.737	695.5	697.5	698.5
	0.738	697	697.5	696
	0.739	695.5	697	699
	0.74	697.5	696	698
	0.741	696.5	697.5	698.5
	0.742	698.5	699.5	697.5
	0.743	697.5	699.5	693
	0.744	696.5	696.5	697.5
	0.745	697	697	697
	0.746	697.5	696	697
	0.747	695	695	697.5
	0.748	693.5	696.5	699.5
	0.749	697	698.5	698.5
	0.75	695	699	700
	0.751	696	698.5	697.5
	0.752	695	699	697.5
	0.753	699	699	697
	0.754	696.5	700	698.5
	0.755	697	696.5	695
	0.756	699	698	693.5
	0.757	700.5	698.5	695
	0.758	697.5	699.5	701
	0.759	696	697.5	697
	0.76	697.5	698.5	696
	0.761	697.5	699	697.5
	0.762	700	696	698.5
	0.763	697	697	694
	0.764	697.5	700	697.5
	0.765	698	697	699.5
	0.766	700	700	698.5
	0.767	701.5	700	697
	0.768	698	698	697.5
	0.769	697	695.5	698
	0.77	696	699	700
	0.771	697.5	697.5	701.5
	0.772	695.5	698	699
	0.773	697.5	698.5	698.5
	0.774	697.5	697.5	699.5
	0.775	695.5	698	698
	0.776	695.5	697.5	700.5
	0.777	699	699	701.5
	0.778	698	698.5	698.5
	0.779	698	696.5	698.5
	0.78	699.5	696	700
	0.781	700	698.5	701.5
	0.782	698	699	700.5
	0.783	697.5	697	701.5
	0.784	699	698	701.5
	0.785	698.5	698	701.5
	0.786	694.5	697.5	701.5
	0.787	699.5	697.5	698
	0.788	697.5	701.5	699
	0.789	701.5	697.5	701.5
	0.79	699	698	700
	0.791	698.5	699	700.5
	0.792	700.5	696	699.5
	0.793	698.5	698	698.5
	0.794	699.5	701.5	699.5
	0.795	700.5	697	699
	0.796	697.5	699	701.5
	0.797	701.5	694.5	699
	0.798	697.5	697	698
	0.799	697	699.5	700.5
	0.8	699.5	699	696.5
	0.801	698.5	700.5	697
	0.802	698	695.5	694
	0.803	701.5	695	697.5
	0.804	701.5	697.5	697
	0.805	699.5	698	698.5
	0.806	699	695	697.5
	0.807	696.5	696	696.5
	0.808	698.5	693.5	693
	0.809	698.5	695.5	694
	0.81	700	699	698.5
	0.811	699	697.5	699.5
	0.812	697.5	698	696
	0.813	704	690.5	698
	0.814	699.5	697.5	694
	0.815	697.5	700.5	695.5
	0.816	701.5	695	695.5
	0.817	698.5	694.5	694
	0.818	700.5	693.5	690.5
	0.819	696	693	695.5
	0.82	700	696	694
	0.821	699.5	695	693.5
	0.822	698.5	696.5	692
	0.823	701.5	697.5	695.5
	0.824	698.5	697.5	691
	0.825	699	695.5	695
	0.826	696.5	696	695
	0.827	698.5	694	694.5
	0.828	699	697	690.5
	0.829	697.5	699	692.5
	0.83	699	695	689.5
	0.831	697.5	695.5	694
	0.832	701	693	693.5
	0.833	697.5	694	692.5
	0.834	699.5	694	691.5
	0.835	697.5	696.5	692
	0.836	697.5	690.5	691
	0.837	697.5	694	691
	0.838	694	692.5	691.5
	0.839	696	693	693.5
	0.84	698	694.5	691.5
	0.841	693.5	693.5	690.5
	0.842	696	699.5	689.5
	0.843	697.5	695	693
	0.844	696	693.5	692
	0.845	697	691	693
	0.846	695	694	692.5
	0.847	694	696.5	691
	0.848	695	696.5	690.5
	0.849	697.5	693.5	694
	0.85	697	697	693
	0.851	694	694	689.5
	0.852	697	696	694
	0.853	697.5	698.5	691
	0.854	693	697.5	697.5
	0.855	696	697	691
	0.856	697.5	697	692
	0.857	699	697.5	691.5
	0.858	699	697	691
	0.859	697	697.5	690.5
	0.86	696.5	698	689.5
	0.861	696	695	693
	0.862	698	695.5	691
	0.863	696	695.5	692
	0.864	699	695	690.5
	0.865	700.5	696.5	692.5
	0.866	694.5	693.5	695.5
	0.867	701.5	696	693
	0.868	696	695	692
	0.869	695.5	693	695
	0.87	697.5	698	696
	0.871	694.5	697.5	694.5
	0.872	699.5	697.5	694.5
	0.873	700	699.5	690.5
	0.874	697.5	696	695
	0.875	697	695.5	697
	0.876	697.5	698	691
	0.877	697.5	699.5	693
	0.878	696	699.5	692
	0.879	696	695.5	696
	0.88	700.5	695	697.5
	0.881	696.5	700.5	695.5
	0.882	699	697.5	696
	0.883	698	697.5	697.5
	0.884	698	699.5	697.5
	0.885	700	699	697
	0.886	697.5	699	694.5
	0.887	700.5	697.5	696
	0.888	697.5	698.5	697
	0.889	698.5	695	695.5
	0.89	698	696.5	697
	0.891	696.5	699	697.5
	0.892	699	700	697
	0.893	699.5	696	697
	0.894	695.5	698	696.5
	0.895	697.5	699.5	695.5
	0.896	696.5	698	696.5
	0.897	697	696.5	698.5
	0.898	697.5	697.5	695.5
	0.899	697.5	698	693
	0.9	697.5	697.5	699
	0.901	699.5	693.5	697
	0.902	699.5	697.5	698
	0.903	701.5	697.5	699
	0.904	698	699	699
	0.905	698	698.5	696.5
	0.906	695	697.5	696.5
	0.907	697.5	697.5	694
	0.908	696.5	697.5	697.5
	0.909	695.5	698	697
	0.91	695	696.5	696.5
	0.911	699.5	695.5	698.5
	0.912	697.5	694.5	696.5
	0.913	697	698	696.5
	0.914	697.5	695.5	699.5
	0.915	697.5	694	696.5
	0.916	697.5	695	696
	0.917	697.5	697.5	694.5
	0.918	699	695	695
	0.919	697.5	696.5	694
	0.92	695	698.5	698.5
	0.921	695.5	693.5	700
	0.922	697.5	694	699.5
	0.923	697	697.5	696
	0.924	695	696	696
	0.925	699.5	694	700.5
	0.926	697	692.5	698
	0.927	694.5	692	696.5
	0.928	697.5	697.5	697.5
	0.929	697.5	694.5	698
	0.93	696	695	697.5
	0.931	701.5	696.5	697
	0.932	700	695	693.5
	0.933	697	696.5	697.5
	0.934	697	695	699
	0.935	695.5	696.5	698.5
	0.936	696	697.5	697.5
	0.937	696	694	699
	0.938	697.5	697	694.5
	0.939	696	697.5	698.5
	0.94	696.5	692.5	699.5
	0.941	699	695.5	697.5
	0.942	698	695	696.5
	0.943	695.5	693	699.5
	0.944	697	693.5	698.5
	0.945	696.5	695.5	701.5
	0.946	697	697.5	699.5
	0.947	699	696.5	700
	0.948	699	696.5	701.5
	0.949	697.5	696.5	699
	0.95	701.5	692.5	701.5
	0.951	699	695.5	697
	0.952	696	695.5	700.5
	0.953	701.5	696.5	697
	0.954	698.5	696.5	699
	0.955	696	697.5	699
	0.956	698.5	695	699.5
	0.957	697	697	701.5
	0.958	699.5	694	698
	0.959	698.5	696	701.5
	0.96	697.5	695.5	703.5
	0.961	698	693.5	697.5
	0.962	699.5	696	698
	0.963	697	691	700.5
	0.964	699	693.5	698.5
	0.965	697.5	696.5	700.5
	0.966	697.5	695	698.5
	0.967	698	695.5	697.5
	0.968	697.5	696.5	698.5
	0.969	696	699	697.5
	0.97	701.5	697.5	700.5
	0.971	698.5	696	699.5
	0.972	698	695	698
	0.973	697.5	694	697
	0.974	697.5	695.5	700
	0.975	698	695	700.5
	0.976	694	695.5	700.5
	0.977	694	695	696.5
	0.978	696.5	694	696.5
	0.979	695	696	699.5
	0.98	700	699.5	698
	0.981	697	698.5	697.5
	0.982	700	692	698.5
	0.983	700.5	697	694.5
	0.984	697	701.5	697
	0.985	699.5	697.5	697.5
	0.986	698	699	698
	0.987	700.5	695	697.5
	0.988	699	697.5	696
	0.989	694.5	697.5	694.5
	0.99	698	693	696.5
	0.991	697.5	697.5	697.5
	0.992	697	696	691
	0.993	696	697.5	695.5
	0.994	698	700.5	696
	0.995	697.5	696	694
	0.996	700	697.5	696.5
	0.997	697.5	696.5	697
	0.998	697.5	696	697.5
	0.999	695.5	694	697.5
	1	696	697	695.5
	1.001	694.5	695.5	694.5
	1.002	695.5	696	691.5
	1.003	701	694.5	694
	1.004	699	697.5	696
	1.005	695.5	700	694
	1.006	699	698	695
	1.007	697.5	697.5	691
	1.008	701.5	696.5	692.5
	1.009	694	695	697
	1.01	700	695.5	696
	1.011	701	697.5	695.5
	1.012	698	697	695.5
	1.013	700	697	695.5
	1.014	701.5	696.5	695
	1.015	700	696	693.5
	1.016	698.5	696	697.5
	1.017	701.5	697.5	692.5
	1.018	699.5	694.5	695.5
	1.019	699.5	697	695
	1.02	697	696.5	698
	1.021	700.5	696.5	698.5
	1.022	698	694.5	696
	1.023	700	697	695
	1.024	699	696	694
	1.025	700.5	699	696
	1.026	701.5	697.5	697.5
	1.027	699.5	697.5	697.5
	1.028	699	696.5	696.5
	1.029	701.5	696.5	696
	1.03	698	696.5	698
	1.031	698	699	698.5
	1.032	698.5	694	695
	1.033	700	701.5	695.5
	1.034	700.5	699	694.5
	1.035	704	694	694.5
	1.036	697	695.5	695.5
	1.037	699	694.5	698
	1.038	696.5	696.5	701
	1.039	696.5	694	697
	1.04	697.5	697.5	696.5
	1.041	698	697.5	693
	1.042	698.5	696.5	696.5
	1.043	696	697.5	698
	1.044	701.5	694	696.5
	1.045	699.5	698	696.5
	1.046	701.5	695.5	697.5
	1.047	699	697	697
	1.048	699	694.5	695.5
	1.049	699.5	695	700.5
	1.05	699	696	696
	1.051	697.5	696.5	699
	1.052	696.5	694	693
	1.053	699.5	691.5	697.5
	1.054	695.5	696.5	694
	1.055	698.5	699	697.5
	1.056	698	696	695
	1.057	697.5	698	697
	1.058	697.5	695	697.5
	1.059	698.5	695.5	697.5
	1.06	700.5	694	701.5
	1.061	697.5	699	696
	1.062	697.5	695.5	700
	1.063	698	694	698
	1.064	699	698	699
	1.065	696.5	695	699
	1.066	695	697	696
	1.067	696	697	696.5
	1.068	698	697	697
	1.069	695	695.5	697
	1.07	696.5	695	697
	1.071	697.5	697	699.5
	1.072	696	697.5	696.5
	1.073	698.5	698	699
	1.074	696	697.5	699
	1.075	698	692	696.5
	1.076	696	697	697
	1.077	694	697.5	697
	1.078	698.5	696.5	694.5
	1.079	696	698.5	700
	1.08	698	697.5	698
	1.081	696	696.5	697
	1.082	698.5	694.5	698.5
	1.083	697	694	696.5
	1.084	693.5	693	699.5
	1.085	695.5	697	697
	1.086	696.5	697	696.5
	1.087	697	699.5	697.5
	1.088	697.5	699	700
	1.089	694	698.5	697
	1.09	698	697.5	698
	1.091	694.5	697.5	697.5
	1.092	697.5	698	699.5
	1.093	692	700.5	697.5
	1.094	697.5	699	696
	1.095	698.5	697	698
	1.096	694.5	698	696.5
	1.097	695.5	697.5	701
	1.098	697	701	698
	1.099	695.5	699	699.5
	1.1	694	697.5	698.5
	1.101	698	701.5	699.5
	1.102	692	701.5	697.5
	1.103	694	698.5	695
	1.104	693.5	701	699.5
	1.105	694	699.5	696
	1.106	695.5	699.5	695
	1.107	695	698	697
	1.108	695.5	700	701.5
	1.109	697.5	699	699.5
	1.11	697.5	698.5	696.5
	1.111	695.5	701.5	697.5
	1.112	691.5	697	698
	1.113	697.5	699.5	697
	1.114	696	699.5	694
	1.115	695	699	696.5
	1.116	698	698	694
	1.117	697	698.5	696.5
	1.118	693	699	696
	1.119	695	699.5	698
	1.12	695	701.5	697.5
	1.121	693.5	699.5	697.5
	1.122	693.5	698	700
	1.123	695	700.5	697
	1.124	700	695.5	697.5
	1.125	695	697	697.5
	1.126	696.5	696	697.5
	1.127	695	698	697
	1.128	695	696	696
	1.129	693.5	700.5	695.5
	1.13	690.5	697.5	697.5
	1.131	695	697.5	695
	1.132	693	697.5	694.5
	1.133	693.5	695.5	699
	1.134	697	696.5	697
	1.135	696.5	692	696.5
	1.136	697.5	697.5	696
	1.137	694	696	700.5
	1.138	696	695	696.5
	1.139	695	695.5	697.5
	1.14	694	696	694
	1.141	693.5	693.5	695
	1.142	696.5	691.5	697
	1.143	695.5	696	693
	1.144	697	695	696.5
	1.145	694	696	698.5
	1.146	695.5	693	694
	1.147	692.5	697	697.5
	1.148	694	695	694.5
	1.149	692	693	697.5
	1.15	693.5	694	694.5
	1.151	694.5	692	697.5
	1.152	694.5	695.5	697.5
	1.153	696.5	691	697
	1.154	695	695	697.5
	1.155	692.5	694	699.5
	1.156	694	692.5	695.5
	1.157	697.5	691	697.5
	1.158	699	691.5	698.5
	1.159	692.5	693.5	698.5
	1.16	696.5	695	697
	1.161	694	693.5	695
	1.162	690.5	695	695.5
	1.163	695.5	690.5	698.5
	1.164	693	695	696
	1.165	697	694	696
	1.166	693	696	696
	1.167	696	693	697.5
	1.168	696.5	695.5	697.5
	1.169	694	696	699
	1.17	695	692	697
	1.171	697	697.5	696
	1.172	694	695	696.5
	1.173	697.5	694	694
	1.174	696	695.5	694
	1.175	695	696	697.5
	1.176	695.5	691.5	696
	1.177	697.5	693	698.5
	1.178	696	697	696
	1.179	696	694	696
	1.18	698.5	693.5	699
	1.181	696.5	694.5	696
	1.182	700.5	696	697.5
	1.183	694	694	698
	1.184	697	695.5	697
	1.185	700	694.5	696
	1.186	695	696	699
	1.187	695	695	695.5
	1.188	699	696	694
	1.189	696.5	696	698
	1.19	701.5	695.5	698
	1.191	697.5	696	694
	1.192	699.5	696.5	698
	1.193	700	697.5	696.5
	1.194	699	698.5	695
	1.195	699	696	695
	1.196	699	698	699
	1.197	699	697	695
	1.198	697.5	693	700.5
	1.199	699	697.5	697.5
	1.2	699.5	697	696
	1.201	699	697.5	697.5
	1.202	700	697.5	697
	1.203	701.5	695	698
	1.204	701	697.5	698.5
	1.205	696	698.5	699
	1.206	698.5	695	696
	1.207	700.5	699	697
	1.208	700	696	699.5
	1.209	700.5	690.5	700.5
	1.21	701	697.5	696
	1.211	703.5	697.5	697.5
	1.212	701.5	700	694.5
	1.213	701.5	698	693.5
	1.214	699.5	695.5	697.5
	1.215	701.5	695.5	698.5
	1.216	701.5	694	697.5
	1.217	704	696.5	696
	1.218	701.5	691.5	697
	1.219	701.5	696.5	697.5
	1.22	700.5	693.5	696
	1.221	701.5	695	699
	1.222	701.5	697.5	694
	1.223	699.5	693.5	698
	1.224	704.5	694.5	697.5
	1.225	701.5	697	697.5
	1.226	701.5	697.5	698.5
	1.227	701	694.5	700.5
	1.228	701.5	697	695.5
	1.229	701.5	696.5	700.5
	1.23	700	692	700
	1.231	701.5	694.5	697.5
	1.232	700.5	697	696
	1.233	701.5	693.5	697
	1.234	699.5	695.5	699.5
	1.235	701.5	697	694.5
	1.236	700.5	699	697
	1.237	704.5	696	698
	1.238	701.5	696	698.5
	1.239	701	698.5	697.5
	1.24	701.5	694.5	696.5
	1.241	701	696	697.5
	1.242	699	694.5	699
	1.243	699	696.5	697
	1.244	700.5	695.5	701
	1.245	697.5	694.5	700
	1.246	701	692	701.5
	1.247	699.5	695	701.5
	1.248	697.5	696	699.5
	1.249	701.5	695	701.5
	1.25	698.5	695	699.5
	1.251	697	691	701.5
	1.252	701.5	697.5	701.5
	1.253	697.5	697.5	699.5
	1.254	700	696.5	700
	1.255	700.5	695.5	705.5
	1.256	698.5	699	701.5
	1.257	700.5	696.5	701.5
	1.258	699	693.5	701.5
	1.259	700.5	699.5	703.5
	1.26	697	697.5	701.5
	1.261	701.5	698	699
	1.262	699	696.5	701.5
	1.263	698	696.5	703
	1.264	697.5	697.5	701
	1.265	699	697.5	707
	1.266	698.5	697.5	701.5
	1.267	699	698.5	705.5
	1.268	697.5	698	704.5
	1.269	697.5	697.5	707
	1.27	696	697.5	704
	1.271	696.5	697	706.5
	1.272	698.5	698	704.5
	1.273	698	697.5	704.5
	1.274	698	697	703.5
	1.275	697.5	697.5	701.5
	1.276	698.5	697.5	704.5
	1.277	697.5	698.5	707.5
	1.278	701.5	698.5	707.5
	1.279	699	697.5	701.5
	1.28	701	697.5	708
	1.281	700	699.5	705
	1.282	697	696.5	708
	1.283	700	698	704.5
	1.284	700	698.5	705.5
	1.285	698.5	698.5	701.5
	1.286	697.5	701.5	705
	1.287	704.5	697.5	703
	1.288	698.5	699.5	701.5
	1.289	700.5	699	704
	1.29	696	700	706.5
	1.291	698.5	696	704
	1.292	701.5	696	700
	1.293	701.5	699	699.5
	1.294	698.5	700.5	701.5
	1.295	701.5	699.5	706.5
	1.296	696	697.5	699.5
	1.297	704.5	701.5	701
	1.298	701.5	698.5	704.5
	1.299	697.5	697.5	700.5
	1.3	698	697.5	701.5
	1.301	701.5	697.5	698.5
	1.302	701.5	695	697.5
	1.303	701.5	695.5	697.5
	1.304	696.5	698.5	699.5
	1.305	698.5	697.5	698
	1.306	701.5	697.5	695.5
	1.307	701	696	700
	1.308	701.5	696.5	698.5
	1.309	697.5	697.5	697
	1.31	699.5	698	695.5
	1.311	701	697.5	697
	1.312	700.5	696.5	694.5
	1.313	698	693	697
	1.314	699	699.5	695
	1.315	700	693.5	697.5
	1.316	700.5	695	697.5
	1.317	697.5	696.5	697.5
	1.318	697	693	696
	1.319	697.5	695	693
	1.32	698.5	695	694
	1.321	697	695	697.5
	1.322	697	697.5	696
	1.323	697	696.5	697
	1.324	692	698	690
	1.325	694	697.5	691
	1.326	693.5	691	692
	1.327	693.5	696	690
	1.328	695.5	692.5	690
	1.329	691	698	690.5
	1.33	689	696.5	689.5
	1.331	692	695.5	690
	1.332	688.5	692.5	688
	1.333	685.5	694	686.5
	1.334	688	693	684.5
	1.335	683	694	685.5
	1.336	688.5	695	684
	1.337	682	694	685
	1.338	681.5	691.5	681
	1.339	680.5	694	681
	1.34	681	697.5	679
	1.341	680.5	696	679
	1.342	677.5	694.5	676
	1.343	678	692	671.5
	1.344	671.5	696	674
	1.345	671	695.5	671
	1.346	667	696	671.5
	1.347	669	694	664
	1.348	667	695	665
	1.349	660.5	695.5	662.5
	1.35	655	696	663.5
	1.351	654	693.5	659.5
	1.352	653.5	696.5	656
	1.353	650	694	656.5
	1.354	649.5	691.5	655
	1.355	645	694.5	649.5
	1.356	644.5	692	642
	1.357	636	696	642
	1.358	634.5	694	640
	1.359	626.5	695.5	637
	1.36	623	695	637.5
	1.361	624.5	696	631
	1.362	612	690.5	629
	1.363	612	695	627
	1.364	608.5	692.5	622.5
	1.365	606	695	620
	1.366	600	693.5	616.5
	1.367	595	692.5	613
	1.368	591	695	609
	1.369	588	697.5	608
	1.37	584	696.5	602.5
	1.371	576.5	697	599
	1.372	571.5	697.5	595.5
	1.373	565	697.5	590
	1.374	563.5	696.5	589
	1.375	557.5	695	587
	1.376	554	695	579
	1.377	549	694	576.5
	1.378	538.5	697.5	571.5
	1.379	536.5	696	569
	1.38	534	697.5	565.5
	1.381	524.5	696.5	558.5
	1.382	522.5	697	552.5
	1.383	515	698.5	552.5
	1.384	512	695.5	547.5
	1.385	511	695	545
	1.386	503.5	697.5	541
	1.387	501	697.5	535.5
	1.388	488.5	697.5	532.5
	1.389	487	697	530
	1.39	484.5	697.5	522.5
	1.391	480.5	697.5	519.5
	1.392	475.5	697	514
	1.393	470	698	506.5
	1.394	462.5	693.5	506.5
	1.395	459	697	501
	1.396	452.5	696	493.5
	1.397	447.5	695	490.5
	1.398	439.5	698	488
	1.399	436.5	695.5	478.5
	1.4	429	697.5	475
	1.401	422	692	470
	1.402	417	698.5	465
	1.403	412.5	696	459
	1.404	404.5	698	451.5
	1.405	398.5	697.5	446.5
	1.406	391	694.5	442.5
	1.407	385	697.5	435
	1.408	378	694	430.5
	1.409	371	697.5	424
	1.41	365.5	696.5	416.5
	1.411	355	695.5	411
	1.412	348.5	697	400
	1.413	339	695.5	395.5
	1.414	332	699.5	386
	1.415	322	693.5	380
	1.416	317.5	697.5	370.5
	1.417	309	697.5	364
	1.418	299.5	695.5	354
	1.419	289	695.5	347
	1.42	282	696.5	338.5
	1.421	273.5	696	328.5
	1.422	264.5	699	318.5
	1.423	256.5	697	317
	1.424	248	696	306
	1.425	246	698	298.5
	1.426	234	696	293.5
	1.427	227	697	284
	1.428	221.5	697.5	273.5
	1.429	213	698	268.5
	1.43	204.5	697	262.5
	1.431	202.5	698	253
	1.432	194.5	696	244.5
	1.433	191	698	236
	1.434	182.5	698.5	229
	1.435	181	697.5	222
	1.436	171	696.5	216
	1.437	168	698.5	205.5
	1.438	164.5	701	201.5
	1.439	164	697.5	194.5
	1.44	157.5	701.5	189
	1.441	154.5	700.5	184
	1.442	151.5	698	177.5
	1.443	143.5	698	169.5
	1.444	143.5	697.5	163.5
	1.445	142	701.5	159.5
	1.446	138.5	701.5	156.5
	1.447	136.5	701.5	149
	1.448	133.5	701.5	149
	1.449	133	701	143.5
	1.45	129	701	136.5
	1.451	127	700.5	133
	1.452	124	704.5	129
	1.453	120.5	698.5	127.5
	1.454	119	704	124.5
	1.455	116	701.5	121.5
	1.456	121.5	700	118
	1.457	116	704.5	113.5
	1.458	114.5	697	109.5
	1.459	109	705.5	108
	1.46	113.5	701.5	107
	1.461	106.5	701.5	105.5
	1.462	110.5	701.5	100
	1.463	104	701.5	95.5
	1.464	103	701	100
	1.465	102	703.5	94.5
	1.466	102.5	703	89.5
	1.467	99	701	92
	1.468	96.5	704	87.5
	1.469	95.5	701.5	86
	1.47	96	701.5	84
	1.471	92	701.5	85
	1.472	96	701	84
	1.473	92.5	704.5	80.5
	1.474	93.5	701.5	76.5
	1.475	95.5	703.5	79.5
	1.476	90.5	705	74
	1.477	92.5	707.5	76
	1.478	88	705	75.5
	1.479	88.5	706	73
	1.48	85.5	706	71
	1.481	87.5	706	69.5
	1.482	85	709	72.5
	1.483	87	704.5	68
	1.484	89	703.5	67.5
	1.485	85	704.5	71.5
	1.486	82	704.5	67.5
	1.487	83.5	705	69
	1.488	82.5	704.5	64
	1.489	81.5	707.5	67
	1.49	83	703.5	65
	1.491	82	704.5	66
	1.492	82.5	704.5	66.5
	1.493	82	705	62.5
	1.494	83	706	63
	1.495	82	704	65
	1.496	81	707.5	62
	1.497	84	699	60.5
	1.498	82	698	61
	1.499	83.5	701.5	66
	1.5	81	699	62.5
	1.501	84.5	701	63.5
	1.502	82	698.5	64
	1.503	80.5	695	66
	1.504	82	694	66
	1.505	82	694	64.5
	1.506	83.5	693	65.5
	1.507	86	692.5	67.5
	1.508	84.5	689.5	62
	1.509	85	690.5	66
	1.51	85.5	690.5	66.5
	1.511	82.5	689.5	64.5
	1.512	83.5	686.5	64
	1.513	84	684.5	66
	1.514	84.5	685.5	66
	1.515	82.5	682	65
	1.516	86	683	68.5
	1.517	85.5	678.5	72
	1.518	84.5	682.5	69.5
	1.519	88.5	678	71
	1.52	87.5	675	70.5
	1.521	90	676.5	69.5
	1.522	87.5	673	73.5
	1.523	88	674	73.5
	1.524	89.5	670	80
	1.525	91.5	670	78.5
	1.526	88	667.5	82
	1.527	92.5	666	82
	1.528	91	664	89.5
	1.529	91.5	661.5	89.5
	1.53	87.5	659	89
	1.531	93.5	656.5	94.5
	1.532	93	654	94.5
	1.533	89.5	649	95
	1.534	92.5	641.5	98.5
	1.535	90.5	638	101
	1.536	91.5	638.5	107.5
	1.537	92.5	634	104.5
	1.538	88	632.5	113
	1.539	92	634	110.5
	1.54	90	625.5	113
	1.541	89	619.5	113.5
	1.542	90	615.5	116
	1.543	87	613.5	117.5
	1.544	89.5	609.5	120
	1.545	90.5	604.5	123
	1.546	93	597	124
	1.547	91	597	122.5
	1.548	89.5	594	126.5
	1.549	93	585	124
	1.55	92.5	582	127
	1.551	94.5	580.5	132
	1.552	91.5	572	131.5
	1.553	95.5	567	134.5
	1.554	97.5	562.5	133
	1.555	93.5	556.5	136.5
	1.556	95.5	554.5	136
	1.557	96	548.5	137.5
	1.558	98.5	543.5	140
	1.559	100	533.5	141
	1.56	98	531.5	143
	1.561	101	522.5	143
	1.562	101	518.5	143
	1.563	104	510	145
	1.564	103.5	505	144.5
	1.565	107	499	144.5
	1.566	107	487	150
	1.567	112.5	482.5	146
	1.568	113	475	150
	1.569	111.5	466	151
	1.57	112	463	152.5
	1.571	117	454	156.5
	1.572	118	444.5	155
	1.573	120	438.5	155
	1.574	124	431	157
	1.575	124	424.5	157
	1.576	127.5	414.5	156.5
	1.577	133	404.5	159
	1.578	134	396.5	161
	1.579	134.5	390	163.5
	1.58	141.5	382.5	167
	1.581	142	376	166
	1.582	146	367.5	169
	1.583	151	357.5	172
	1.584	153	349	172.5
	1.585	158	344.5	174
	1.586	166	337	175
	1.587	173.5	325.5	178
	1.588	185	317	175.5
	1.589	195.5	307	180.5
	1.59	209	301.5	182.5
	1.591	223	294	186.5
	1.592	234.5	287	187
	1.593	248	277.5	187.5
	1.594	259.5	269	195.5
	1.595	269	262	192
	1.596	278	252	194.5
	1.597	282	243	196.5
	1.598	288	238.5	198
	1.599	283.5	230.5	201.5
	1.6	289	222.5	202
	1.601	287	216	204
	1.602	286	208.5	205.5
	1.603	285	204	208
	1.604	290	198.5	210.5
	1.605	289.5	195.5	210.5
	1.606	294	189	215.5
	1.607	291.5	184.5	213
	1.608	293.5	172	215
	1.609	292.5	174	218.5
	1.61	295	167.5	221.5
	1.611	298	164.5	225
	1.612	296.5	161.5	225.5
	1.613	297	153	231
	1.614	296.5	154.5	231
	1.615	301.5	150.5	234
	1.616	306.5	150	239
	1.617	308.5	143.5	245
	1.618	310.5	141.5	244.5
	1.619	317.5	136.5	249
	1.62	320.5	135.5	250.5
	1.621	329.5	136	256
	1.622	334.5	129.5	266
	1.623	337.5	127	267.5
	1.624	343	124	270.5
	1.625	354.5	124.5	278.5
	1.626	362.5	121.5	286.5
	1.627	371.5	121.5	290
	1.628	376.5	115.5	297
	1.629	385	110	301.5
	1.63	398.5	109	306.5
	1.631	409	103	312.5
	1.632	417	102	321
	1.633	424	97.5	328
	1.634	435.5	96.5	334.5
	1.635	444.5	95.5	339.5
	1.636	457.5	91.5	346
	1.637	469	89.5	354
	1.638	479.5	91.5	357.5
	1.639	493	90	362.5
	1.64	500	91.5	371
	1.641	513.5	91.5	376
	1.642	529.5	92.5	383.5
	1.643	540	92.5	389
	1.644	552.5	91	397
	1.645	569	93	403.5
	1.646	581.5	92.5	407.5
	1.647	599.5	95	415.5
	1.648	617.5	95	425.5
	1.649	632.5	95.5	433
	1.65	644.5	94.5	442
	1.651	663.5	98.5	452
	1.652	681	98.5	463
	1.653	701.5	99	473.5
	1.654	719.5	102.5	486
	1.655	734.5	99	495.5
	1.656	757	97	512
	1.657	777.5	99.5	526
	1.658	793.5	96.5	540
	1.659	815.5	98.5	557
	1.66	840	98.5	573
	1.661	859	99.5	589.5
	1.662	879.5	95	603.5
	1.663	897.5	95.5	618.5
	1.664	918.5	94.5	633.5
	1.665	943.5	94	648.5
	1.666	962.5	95.5	664
	1.667	985	93.5	680.5
	1.668	1005.5	87.5	696
	1.669	1024.5	88.5	714
	1.67	1050.5	88.5	731
	1.671	1065	88	749.5
	1.672	1082.5	84.5	761
	1.673	1100	84.5	782
	1.674	1116	80.5	795.5
	1.675	1134	77	815
	1.676	1145.5	72.5	833
	1.677	1161.5	73	847
	1.678	1176.5	70	863
	1.679	1186	68	880.5
	1.68	1198.5	64.5	901.5
	1.681	1208.5	62.5	918.5
	1.682	1220.5	64	937
	1.683	1232.5	65	955
	1.684	1238	63	972.5
	1.685	1253	64.5	987.5
	1.686	1261.5	63.5	1010
	1.687	1268	60.5	1026
	1.688	1282	63.5	1048
	1.689	1291.5	65	1059.5
	1.69	1305.5	63	1082.5
	1.691	1309.5	63.5	1096.5
	1.692	1320	66	1115.5
	1.693	1332.5	65.5	1131.5
	1.694	1342	66	1148
	1.695	1353.5	69.5	1158.5
	1.696	1362.5	67.5	1178.5
	1.697	1372.5	68	1193.5
	1.698	1386	72.5	1211
	1.699	1395.5	72.5	1227
	1.7	1412.5	77.5	1238
	1.701	1427	73.5	1253
	1.702	1441	76.5	1268
	1.703	1453	82	1283
	1.704	1468	84.5	1298
	1.705	1485	82	1310.5
	1.706	1495.5	86.5	1325.5
	1.707	1512	89.5	1339
	1.708	1530	88.5	1354.5
	1.709	1545	89	1368
	1.71	1562.5	88.5	1381.5
	1.711	1581	91.5	1394
	1.712	1596	94.5	1407.5
	1.713	1616	93.5	1424
	1.714	1630.5	97	1440
	1.715	1648	95	1456
	1.716	1655.5	99	1470.5
	1.717	1676	100	1491
	1.718	1690	100.5	1504.5
	1.719	1704	100	1525.5
	1.72	1715.5	106.5	1536.5
	1.721	1730.5	106.5	1563.5
	1.722	1745	105.5	1581
	1.723	1753.5	109	1596
	1.724	1773	108.5	1614.5
	1.725	1785	112.5	1632
	1.726	1797	110.5	1651
	1.727	1805	110.5	1665.5
	1.728	1818.5	116	1685
	1.729	1828	117.5	1700.5
	1.73	1842	116.5	1715.5
	1.731	1855.5	119.5	1736
	1.732	1864.5	122.5	1745
	1.733	1879.5	123	1767
	1.734	1890.5	123	1784
	1.735	1903.5	126	1797.5
	1.736	1914	126.5	1818
	1.737	1924	131	1834
	1.738	1936	135.5	1848.5
	1.739	1946.5	136.5	1857
	1.74	1954	136.5	1874.5
	1.741	1968.5	144	1890
	1.742	1981.5	143.5	1894.5
	1.743	1996	144	1915.5
	1.744	1998.5	147.5	1929.5
	1.745	2011.5	151	1939
	1.746	2021	154.5	1953
	1.747	2028.5	157	1966
	1.748	2035	161	1980
	1.749	2043	164	1983.5
	1.75	2052	165.5	2003.5
	1.751	2056.5	166.5	2011.5
	1.752	2063	172	2027.5
	1.753	2070	179	2036
	1.754	2073	181	2043.5
	1.755	2073	186.5	2056.5
	1.756	2083.5	185	2065
	1.757	2088	193.5	2073
	1.758	2088	197.5	2082
	1.759	2096.5	198	2095
	1.76	2097.5	203	2103
	1.761	2100.5	204	2108.5
	1.762	2103	207.5	2113.5
	1.763	2103	213.5	2122.5
	1.764	2103	216.5	2131
	1.765	2111.5	221.5	2133
	1.766	2110.5	223.5	2143.5
	1.767	2110.5	226	2147.5
	1.768	2117.5	230	2155
	1.769	2117.5	235.5	2154
	1.77	2114	242.5	2162.5
	1.771	2115	246	2169.5
	1.772	2121.5	255	2173
	1.773	2125.5	258	2175
	1.774	2121.5	270	2177.5
	1.775	2125.5	277.5	2183
	1.776	2124.5	289	2186.5
	1.777	2121.5	294.5	2189
	1.778	2124	304	2192.5
	1.779	2125.5	314.5	2192.5
	1.78	2118	321.5	2192.5
	1.781	2122	331	2203.5
	1.782	2118	330.5	2204.5
	1.783	2118	342.5	2207.5
	1.784	2118	349	2207.5
	1.785	2118	358.5	2207.5
	1.786	2115.5	367	2212.5
	1.787	2115.5	374	2212.5
	1.788	2114	382.5	2216
	1.789	2110.5	386.5	2215
	1.79	2109.5	392.5	2217.5
	1.791	2103	394	2217
	1.792	2103	393	2216.5
	1.793	2100.5	399.5	2217.5
	1.794	2101.5	397	2216
	1.795	2099	404.5	2216.5
	1.796	2096.5	406	2213.5
	1.797	2088	410.5	2216.5
	1.798	2088	415.5	2216.5
	1.799	2087.5	417.5	2215
	1.8	2081.5	417	2207.5
	1.801	2073	422.5	2213
	1.802	2073	427	2213
	1.803	2073	434.5	2207.5
	1.804	2067.5	434	2207.5
	1.805	2064.5	437.5	2204
	1.806	2058.5	437.5	2206.5
	1.807	2056.5	443.5	2203.5
	1.808	2055	450.5	2203.5
	1.809	2047.5	455.5	2192.5
	1.81	2036.5	462	2192.5
	1.811	2035	465.5	2190
	1.812	2028.5	475	2188.5
	1.813	2023	483.5	2183
	1.814	2013.5	491	2177.5
	1.815	2009.5	499	2173.5
	1.816	2009	509	2167
	1.817	1998.5	514	2162.5
	1.818	1995	527	2159
	1.819	1983.5	536.5	2153
	1.82	1982	551	2147
	1.821	1978	563	2133
	1.822	1969	582	2133
	1.823	1963	589.5	2130
	1.824	1954	605.5	2123
	1.825	1954	619	2114
	1.826	1939	636.5	2110.5
	1.827	1939	656.5	2101
	1.828	1931	674.5	2095.5
	1.829	1924	690	2088
	1.83	1922	708	2073
	1.831	1909	724.5	2072.5
	1.832	1908.5	742	2067
	1.833	1894.5	759	2058.5
	1.834	1892.5	777.5	2048
	1.835	1888	794.5	2041
	1.836	1879.5	818	2028.5
	1.837	1875	834.5	2028.5
	1.838	1864.5	855	2013.5
	1.839	1864.5	869.5	2010
	1.84	1860	889	1998.5
	1.841	1847.5	906	1991.5
	1.842	1834.5	921.5	1983.5
	1.843	1834.5	940	1975.5
	1.844	1826	962.5	1967
	1.845	1818.5	979	1954
	1.846	1812.5	997.5	1951
	1.847	1805	1016	1942.5
	1.848	1800.5	1036	1932.5
	1.849	1788.5	1054.5	1928
	1.85	1782.5	1069.5	1914.5
	1.851	1775	1082.5	1905.5
	1.852	1770	1102	1894.5
	1.853	1760	1123	1888.5
	1.854	1755	1134	1879
	1.855	1745	1149	1870
	1.856	1743	1163.5	1864.5
	1.857	1730.5	1178.5	1854.5
	1.858	1727.5	1197	1846.5
	1.859	1715.5	1212	1834.5
	1.86	1713.5	1225.5	1828
	1.861	1708	1238	1823
	1.862	1700.5	1245	1816
	1.863	1693.5	1263.5	1802.5
	1.864	1685.5	1268	1790
	1.865	1680.5	1288.5	1785
	1.866	1675	1296.5	1783.5
	1.867	1669	1309.5	1775
	1.868	1664	1319.5	1760
	1.869	1655.5	1333	1757
	1.87	1652	1344.5	1745
	1.871	1644	1353	1741.5
	1.872	1641	1365	1730.5
	1.873	1636.5	1372.5	1725
	1.874	1633	1387.5	1715.5
	1.875	1630.5	1396.5	1707
	1.876	1626	1408	1700.5
	1.877	1622	1423.5	1694.5
	1.878	1621	1429.5	1688.5
	1.879	1617	1439.5	1681
	1.88	1616.5	1457	1670.5
	1.881	1611	1465.5	1666
	1.882	1614	1477	1655.5
	1.883	1608	1491.5	1652.5
	1.884	1602.5	1501.5	1641
	1.885	1596	1518.5	1638
	1.886	1596	1526	1632
	1.887	1593.5	1544	1626
	1.888	1589.5	1557	1622
	1.889	1581	1574.5	1611
	1.89	1587.5	1587.5	1609
	1.891	1579	1602	1603.5
	1.892	1578	1621	1596
	1.893	1571.5	1632.5	1590.5
	1.894	1566	1647	1587
	1.895	1564.5	1665	1581
	1.896	1559	1678	1577
	1.897	1551.5	1695	1575.5
	1.898	1549.5	1706	1572.5
	1.899	1549	1715.5	1572.5
	1.9	1548	1736	1566
	1.901	1545.5	1745	1560.5
	1.902	1536.5	1769	1556
	1.903	1544	1775	1557.5
	1.904	1536.5	1794	1551
	1.905	1536.5	1805	1548.5
	1.906	1533.5	1823.5	1536.5
	1.907	1533.5	1834.5	1536.5
	1.908	1532	1853	1532
	1.909	1530.5	1862.5	1530.5
	1.91	1531	1878.5	1527
	1.911	1528.5	1889	1521.5
	1.912	1531	1894.5	1519
	1.913	1530.5	1920.5	1514
	1.914	1527.5	1924	1506.5
	1.915	1530.5	1935	1506.5
	1.916	1527.5	1946.5	1502.5
	1.917	1532	1954	1500.5
	1.918	1530	1966	1497
	1.919	1530.5	1976.5	1497
	1.92	1531.5	1983.5	1491.5
	1.921	1534.5	1997	1490
	1.922	1536.5	1998.5	1489
	1.923	1535	2008.5	1489.5
	1.924	1532.5	2013.5	1484
	1.925	1535.5	2026	1477
	1.926	1536.5	2034	1477
	1.927	1535	2040.5	1477
	1.928	1534.5	2050.5	1477
	1.929	1534.5	2056	1475.5
	1.93	1535.5	2058.5	1472.5
	1.931	1535.5	2071	1470.5
	1.932	1536.5	2073	1470.5
	1.933	1536.5	2073	1472.5
	1.934	1536	2086	1468
	1.935	1535.5	2092.5	1467.5
	1.936	1536	2097.5	1470.5
	1.937	1536.5	2102	1473
	1.938	1531	2103	1477
	1.939	1535.5	2113.5	1477
	1.94	1534.5	2116	1477
	1.941	1534.5	2116.5	1476
	1.942	1534.5	2122	1477
	1.943	1536	2118	1477
	1.944	1535	2127	1477
	1.945	1535.5	2130	1483
	1.946	1536.5	2132.5	1484
	1.947	1536.5	2133	1477
	1.948	1536.5	2133	1484
	1.949	1536.5	2142	1483
	1.95	1536.5	2133	1490.5
	1.951	1536.5	2146	1490.5
	1.952	1536.5	2147.5	1491.5
	1.953	1536.5	2147.5	1491.5
	1.954	1536.5	2151.5	1491.5
	1.955	1536.5	2154.5	1496
	1.956	1536.5	2155	1491.5
	1.957	1531.5	2153	1491.5
	1.958	1533	2158	1497.5
	1.959	1535	2159.5	1495.5
	1.96	1533.5	2158	1491.5
	1.961	1532	2157	1500.5
	1.962	1534	2157.5	1500
	1.963	1531	2157	1502
	1.964	1531	2155	1500.5
	1.965	1532.5	2154.5	1501
	1.966	1532.5	2156	1499
	1.967	1529	2147.5	1504.5
	1.968	1527	2147.5	1500.5
	1.969	1526	2147.5	1504.5
	1.97	1531	2147	1506.5
	1.971	1525.5	2145	1505.5
	1.972	1528	2142.5	1504
	1.973	1526	2133	1506.5
	1.974	1521.5	2133	1506.5
	1.975	1521.5	2133	1505.5
	1.976	1524.5	2128	1505.5
	1.977	1521.5	2125.5	1505.5
	1.978	1524.5	2118	1506.5
	1.979	1521.5	2118	1505.5
	1.98	1521.5	2112.5	1506.5
	1.981	1519.5	2110.5	1505.5
	1.982	1521.5	2100	1506.5
	1.983	1518.5	2100	1506
	1.984	1520	2088	1503
	1.985	1519	2088	1503.5
	1.986	1519	2073	1506.5
	1.987	1517.5	2073	1505
	1.988	1515.5	2070	1506.5
	1.989	1518.5	2067	1505
	1.99	1515.5	2058.5	1506.5
	1.991	1513	2049	1504.5
	1.992	1506.5	2043.5	1506.5
	1.993	1506.5	2035.5	1505.5
[truncated: 13,006 more rows]

## Sheet: D
DataTypeVer2.0	Time	Fz	Fz	Fz
NumberOfData		8000	8000	8000
PreTriggerData		0	0	0
SamplingTime[ms]		1	1	1
DataLabel		L1:CMJ	L2:CMJ	L3:CMJ
DataUnit	sec	N	N	N
	0	628	625	632.5
	0.001	630	627	631.5
	0.002	628	626	632
	0.003	629	627.5	630
	0.004	629	626	632.5
	0.005	627.5	628.5	630
	0.006	630	628	629.5
	0.007	629	629	631.5
	0.008	630	629	633
	0.009	634.5	631.5	631.5
	0.01	629.5	627	632.5
	0.011	629	626.5	632.5
	0.012	629.5	627	633.5
	0.013	630	628	630.5
	0.014	631	628.5	632.5
	0.015	629	629.5	635
	0.016	632	625	632.5
	0.017	628	626	636
	0.018	630.5	625	632.5
	0.019	630.5	626.5	637.5
	0.02	629.5	630.5	633.5
	0.021	632.5	629.5	632.5
	0.022	632.5	628.5	629
	0.023	630.5	627	633
	0.024	629.5	629	631
	0.025	630.5	627.5	634
	0.026	632	631	629
	0.027	635	628.5	631
	0.028	632.5	627	632.5
	0.029	632	631.5	631.5
	0.03	630	630	633.5
	0.031	631	628	632
	0.032	632.5	627.5	632
	0.033	630	631	634
	0.034	633.5	631.5	632.5
	0.035	632.5	632.5	633
	0.036	630	630	632.5
	0.037	631.5	630	636
	0.038	634.5	631.5	635.5
	0.039	631	632.5	634.5
	0.04	630.5	629	632.5
	0.041	629	632.5	634.5
	0.042	636	632.5	632
	0.043	629	629	631.5
	0.044	631	632.5	636
	0.045	630	630	635
	0.046	631	631	634.5
	0.047	632	632	634
	0.048	630.5	626.5	635
	0.049	630.5	628	635
	0.05	632.5	631.5	634
	0.051	630.5	631	637
	0.052	628	631.5	632
	0.053	631.5	632.5	632.5
	0.054	630.5	631	632.5
	0.055	631.5	632.5	632
	0.056	630	631.5	632.5
	0.057	629	632	634.5
	0.058	632.5	629.5	630.5
	0.059	626.5	632.5	632
	0.06	630	631.5	632.5
	0.061	629	630	632
	0.062	632	631	632
	0.063	629	634	632.5
	0.064	630	629.5	632
	0.065	629	633.5	632.5
	0.066	629.5	631.5	634
	0.067	628.5	629	630.5
	0.068	629	632	631
	0.069	627.5	628	627
	0.07	628.5	632	630
	0.071	629.5	631	634.5
	0.072	629.5	629	630
	0.073	629	633.5	631
	0.074	627.5	631.5	630.5
	0.075	628.5	632.5	629
	0.076	629.5	629	633.5
	0.077	631	631.5	631
	0.078	627	632.5	632.5
	0.079	629	632.5	628.5
	0.08	629.5	628	628.5
	0.081	628	626.5	627
	0.082	630	632	630.5
	0.083	624.5	631.5	632.5
	0.084	628.5	630	631
	0.085	627.5	631.5	631
	0.086	625.5	631	632.5
	0.087	629	633.5	628.5
	0.088	630	630.5	629
	0.089	627	629	628.5
	0.09	626	635.5	630.5
	0.091	627.5	632	632
	0.092	629	631	631.5
	0.093	629	629.5	632
	0.094	627.5	629	631
	0.095	630.5	630	630.5
	0.096	629	632.5	629
	0.097	632	633	629
	0.098	629	631.5	630
	0.099	631.5	631	631.5
	0.1	628	632.5	629.5
	0.101	632.5	629	627.5
	0.102	632.5	630.5	632.5
	0.103	631	632	630.5
	0.104	629	631.5	629
	0.105	632.5	632.5	632.5
	0.106	634	630.5	631
	0.107	636	632.5	629
	0.108	632	632.5	631.5
	0.109	631	630.5	630.5
	0.11	631.5	635.5	626
	0.111	632	629	626
	0.112	633	630	629
	0.113	631	629.5	628
	0.114	632.5	631	628.5
	0.115	631	628	629
	0.116	632.5	629.5	629.5
	0.117	634.5	634	632
	0.118	631.5	632	629
	0.119	632.5	632.5	631
	0.12	629.5	628.5	628.5
	0.121	634.5	632.5	631.5
	0.122	634.5	630	630
	0.123	631.5	631	627
	0.124	636	631	625.5
	0.125	635	628.5	629.5
	0.126	631.5	630.5	629.5
	0.127	632.5	632.5	632
	0.128	635	630.5	629.5
	0.129	631	634.5	627.5
	0.13	636	635	628
	0.131	630.5	632	628.5
	0.132	634.5	631	628
	0.133	638.5	632	626
	0.134	636.5	632.5	629
	0.135	632.5	632	630.5
	0.136	636.5	632.5	629
	0.137	636	630	629.5
	0.138	636	629	628.5
	0.139	633	633.5	632
	0.14	635.5	631.5	630
	0.141	632	629	630.5
	0.142	635	632.5	629
	0.143	634.5	632.5	625.5
	0.144	633	632	628.5
	0.145	632.5	630.5	630.5
	0.146	630	634	629
	0.147	629.5	631	625
	0.148	634	632.5	627.5
	0.149	630.5	632.5	624.5
	0.15	632.5	632.5	627
	0.151	635	634	625
	0.152	629.5	632.5	627
	0.153	631	629	629
	0.154	636.5	632.5	631.5
	0.155	636.5	632.5	627
	0.156	632.5	632	626.5
	0.157	632	631.5	627.5
	0.158	628.5	633	629
	0.159	629	629	629
	0.16	632	631	630.5
	0.161	632.5	629	631
	0.162	632.5	632	629
	0.163	632.5	632.5	629
	0.164	631	633.5	627.5
	0.165	632	629	629
	0.166	630	629.5	627
	0.167	632	631	629.5
	0.168	634	630	628.5
	0.169	634	632	628
	0.17	632.5	630.5	631
	0.171	630	631	628.5
	0.172	632.5	629.5	628
	0.173	632.5	630	625
	0.174	631	629.5	629
	0.175	631	632	628.5
	0.176	630.5	630.5	630.5
	0.177	629	630	632
	0.178	629.5	631	629
	0.179	631.5	629	629.5
	0.18	630	631	632.5
	0.181	628	632	628
	0.182	627.5	626.5	630.5
	0.183	631	632	629.5
	0.184	630	631	631.5
	0.185	632.5	630	632
	0.186	632	630.5	629
	0.187	631	629	629.5
	0.188	631.5	628.5	631.5
	0.189	627.5	628.5	631
	0.19	629.5	630.5	629.5
	0.191	632	630.5	632.5
	0.192	631.5	626.5	632
	0.193	629.5	628	631.5
	0.194	631.5	628	632
	0.195	629	625	630
	0.196	630.5	626	632.5
	0.197	631.5	626.5	634
	0.198	630	627	630
	0.199	629	629	631
	0.2	629	630.5	629
	0.201	628.5	625.5	629
	0.202	630	627	633.5
	0.203	628	626.5	632.5
	0.204	630.5	626.5	629.5
	0.205	629.5	627	632.5
	0.206	629	626	631
	0.207	634	626	632.5
	0.208	629.5	629	630.5
	0.209	629	627.5	629
	0.21	631.5	627.5	635
	0.211	631	627	631
	0.212	627	627	629
	0.213	630.5	624	629.5
	0.214	629	625.5	629
	0.215	630.5	627	629
	0.216	627	628.5	632.5
	0.217	629.5	625	630
	0.218	629	629	631
	0.219	627.5	626	629
	0.22	630	623	632.5
	0.221	628.5	623.5	632.5
	0.222	629	627.5	636
	0.223	630.5	629	632.5
	0.224	630.5	629.5	629.5
	0.225	629	629	632.5
	0.226	625.5	628	632
	0.227	632.5	629.5	631.5
	0.228	630	627	632.5
	0.229	629.5	629.5	630
	0.23	630.5	628	634.5
	0.231	631.5	630	636
	0.232	630.5	629	634
	0.233	631	625.5	634
	0.234	629.5	626.5	629
	0.235	630	627.5	633
	0.236	630.5	629	632.5
	0.237	632.5	622	633.5
	0.238	634	629	632.5
	0.239	632	627.5	632.5
	0.24	629	625	630
	0.241	632	628.5	633.5
	0.242	631.5	628	635
	0.243	630.5	628.5	632.5
	0.244	629	629.5	634
	0.245	636.5	629	631.5
	0.246	632.5	628.5	632
	0.247	633	631	632.5
	0.248	631.5	626	633.5
	0.249	636	626.5	634.5
	0.25	632	630.5	635.5
	0.251	635	630	631
	0.252	633.5	629	635
	0.253	632.5	628	632
	0.254	630.5	628	632.5
	0.255	629	629	633.5
	0.256	632.5	628.5	637
	0.257	635	629.5	635
	0.258	631.5	630.5	632.5
	0.259	630.5	630	634.5
	0.26	632	632	631.5
	0.261	631.5	636	634.5
	0.262	634.5	631	634
	0.263	632.5	631	635
	0.264	628.5	629.5	634
	0.265	631.5	631	636.5
	0.266	629.5	630	632.5
	0.267	630.5	631	637.5
	0.268	636	628.5	634.5
	0.269	631.5	629.5	634.5
	0.27	632.5	631	635
	0.271	632.5	632	633.5
	0.272	634	632.5	632
	0.273	632	629.5	632.5
	0.274	634	630	628.5
	0.275	631.5	631.5	632.5
	0.276	631.5	629.5	635
	0.277	631.5	628	633.5
	0.278	634	632	631
	0.279	631	629.5	632.5
	0.28	635	628.5	633.5
	0.281	635	631.5	632.5
	0.282	636	630.5	632.5
	0.283	632.5	632.5	630.5
	0.284	630.5	634	632.5
	0.285	631	628.5	632
	0.286	631	630	637
	0.287	633.5	632	631
	0.288	632	630	634.5
	0.289	632.5	629.5	634.5
	0.29	631	633	630
	0.291	632.5	629.5	630.5
	0.292	634.5	631.5	631.5
	0.293	633	631	631.5
	0.294	632.5	632	632.5
	0.295	632.5	629	630
	0.296	632.5	630	630
	0.297	636	629	632.5
	0.298	633.5	630	629.5
	0.299	630.5	630	628
	0.3	632.5	630.5	631.5
	0.301	632.5	630.5	630.5
	0.302	632.5	632	632.5
	0.303	634.5	629	631.5
	0.304	630.5	631.5	629.5
	0.305	632.5	631.5	628
	0.306	632.5	628	629.5
	0.307	631.5	631	632.5
	0.308	636	631	629.5
	0.309	628	628.5	633.5
	0.31	630.5	628	629
	0.311	632	631	630
	0.312	632.5	632.5	632.5
	0.313	631.5	627.5	632.5
	0.314	631	632.5	630.5
	0.315	627.5	630	630
	0.316	633.5	632	629.5
	0.317	630.5	632.5	631.5
	0.318	628.5	630.5	631
	0.319	629	632.5	629
	0.32	629.5	632	629.5
	0.321	630.5	628	632
	0.322	627.5	630	631
	0.323	629	632.5	631.5
	0.324	629.5	632.5	630
	0.325	629.5	632.5	630
	0.326	630	632.5	629
	0.327	629	632.5	627.5
	0.328	631	631.5	629
	0.329	629	634	630
	0.33	629	630.5	629
	0.331	625	635.5	631
	0.332	630	632.5	629
	0.333	627	634	630
	0.334	627	635.5	628
	0.335	629.5	632.5	631
	0.336	627.5	631.5	630.5
	0.337	626	632.5	634
	0.338	628.5	634	631
	0.339	625	634.5	632.5
	0.34	628	632.5	629
	0.341	629.5	634	629
	0.342	627	629	631.5
	0.343	629	636	627.5
	0.344	629	632	631
	0.345	626.5	633.5	631
	0.346	625	634	629
	0.347	626	636	630
	0.348	627	635.5	631.5
	0.349	629.5	634.5	631
	0.35	627.5	632	628.5
	0.351	624.5	636	632
	0.352	630.5	635.5	629
	0.353	627.5	639	631
	0.354	625	634.5	633.5
	0.355	628.5	632	628
	0.356	629	632.5	630.5
	0.357	629	635.5	630.5
	0.358	627	636	631
	0.359	629	634	629
	0.36	629	631.5	628.5
	0.361	628.5	635.5	632
	0.362	629.5	632	630.5
	0.363	628.5	635	627
	0.364	626.5	636	631
	0.365	628.5	631	627.5
	0.366	627	632.5	629
	0.367	629	632.5	630.5
	0.368	627	632	631.5
	0.369	627.5	639	630
	0.37	627	630	631
	0.371	630.5	631.5	629.5
	0.372	632.5	635.5	633
	0.373	627.5	632.5	629.5
	0.374	630.5	632.5	630
	0.375	631	632	629.5
	0.376	629	629	630
	0.377	630	630	629.5
	0.378	630	630	632.5
	0.379	628.5	631.5	633.5
	0.38	628.5	632.5	630
	0.381	629	631.5	627.5
	0.382	630	630	632.5
	0.383	629	632.5	635.5
	0.384	629	631	630.5
	0.385	630.5	629	632.5
	0.386	630.5	632.5	630.5
	0.387	629	629	630.5
	0.388	632.5	627.5	627.5
	0.389	630	629.5	629
	0.39	631.5	630	632
	0.391	627	630	628
	0.392	631.5	630	630.5
	0.393	631.5	634.5	627.5
	0.394	631	631	631.5
	0.395	630.5	629	630.5
	0.396	630.5	629	635
	0.397	628.5	629	629.5
	0.398	632.5	632.5	629.5
	0.399	629	632.5	629
	0.4	634	629.5	632.5
	0.401	630	629	628
	0.402	631.5	633.5	628
	0.403	630.5	631.5	633.5
	0.404	629.5	630.5	632.5
	0.405	628.5	629.5	628
	0.406	629.5	630	631.5
	0.407	630	631	631
	0.408	632.5	630	630
	0.409	632.5	631	632.5
	0.41	632.5	629	633
	0.411	632.5	631.5	628.5
	0.412	634	628	630.5
	0.413	630.5	629	631.5
	0.414	631.5	629.5	632
	0.415	630	629.5	630
	0.416	631	627	629
	0.417	632	631.5	635.5
	0.418	633.5	629.5	631.5
	0.419	632	632.5	636
	0.42	633.5	632	632
	0.421	635.5	633.5	630
	0.422	632.5	629	632.5
	0.423	636.5	633.5	629.5
	0.424	631.5	626.5	632
	0.425	633	629	630
	0.426	634	629	630.5
	0.427	634.5	629	628.5
	0.428	633.5	628.5	630.5
	0.429	635.5	632.5	632
	0.43	631.5	631.5	630
	0.431	633	629	629
	0.432	632.5	630	631
	0.433	634.5	630.5	630.5
	0.434	631	629.5	634
	0.435	634	631.5	632
	0.436	634	625	634
	0.437	635	629.5	636
	0.438	634	631	636
	0.439	635	629	625
	0.44	634	627.5	631
	0.441	631	630.5	636
	0.442	632.5	630	633.5
	0.443	635.5	630	629
	0.444	634.5	628.5	632.5
	0.445	632.5	627.5	632.5
	0.446	632.5	630	630.5
	0.447	632.5	630	633.5
	0.448	633	630.5	631
	0.449	629.5	630.5	634.5
	0.45	635	628	630.5
	0.451	634.5	632	635
	0.452	632.5	629	636
	0.453	635	632	637
	0.454	631.5	630	632
	0.455	636	629.5	632.5
	0.456	632.5	630	632.5
	0.457	631	630	632.5
	0.458	630.5	634	635
	0.459	632	631	634
	0.46	634	629	630.5
	0.461	631	626.5	632.5
	0.462	632	630	634.5
	0.463	635.5	631.5	636.5
	0.464	632.5	629	634.5
	0.465	630.5	630	631.5
	0.466	632.5	631	634.5
	0.467	630.5	630	635
	0.468	630	628	635.5
	0.469	631.5	630	632.5
	0.47	632	630	635.5
	0.471	631	630	631.5
	0.472	631.5	630.5	631.5
	0.473	635	631	634
	0.474	633.5	631	634
	0.475	631	635	636
	0.476	631	629	636
	0.477	629	630	635
	0.478	631.5	631	636
	0.479	632.5	632.5	636
	0.48	634.5	630	636
	0.481	632	632	632.5
	0.482	630	634	632.5
	0.483	635.5	628	632.5
	0.484	630.5	636	632.5
	0.485	632.5	632.5	632.5
	0.486	634.5	631.5	632.5
	0.487	632.5	629.5	635
	0.488	630.5	631	631
	0.489	632.5	630	632.5
	0.49	632.5	631	632.5
	0.491	631	632	634.5
	0.492	628.5	627	631.5
	0.493	635	629	632.5
	0.494	631.5	632.5	631
	0.495	635	629	632
	0.496	630	627	631.5
	0.497	629.5	631.5	632.5
	0.498	631	627.5	632
	0.499	631.5	631	634.5
	0.5	632	630.5	632.5
	0.501	634	630	633.5
	0.502	631.5	630	636
	0.503	632.5	630	634.5
	0.504	630.5	629	633.5
	0.505	632	629	635.5
	0.506	627.5	628	631.5
	0.507	632.5	629.5	633.5
	0.508	630	631	634.5
	0.509	631.5	631	634
	0.51	631.5	628.5	632.5
	0.511	631.5	631	635
	0.512	631.5	629.5	631
	0.513	630.5	629.5	634.5
	0.514	629.5	627.5	634.5
	0.515	629	630	636.5
	0.516	629	629	634.5
	0.517	629	630	636.5
	0.518	632.5	629	632
	0.519	635.5	630	637
	0.52	630	629.5	635.5
	0.521	632	629.5	635.5
	0.522	634	629.5	632.5
	0.523	634.5	632.5	632
	0.524	629.5	632	634
	0.525	631	630	632.5
	0.526	629	629.5	636
	0.527	631.5	630	634.5
	0.528	631.5	629	633.5
	0.529	627	629.5	631
	0.53	626.5	631	632.5
	0.531	632.5	627	634
	0.532	632.5	633.5	633.5
	0.533	629.5	629.5	635
	0.534	630	629	632.5
	0.535	628.5	630	636
	0.536	633.5	626	632.5
	0.537	632	632	628
	0.538	630	628.5	634
	0.539	633.5	631	634.5
	0.54	631	628	631
	0.541	630	629.5	634.5
	0.542	626	629	636.5
	0.543	632.5	631.5	633.5
	0.544	630	631	635
	0.545	629	634	628
	0.546	631.5	632	636.5
	0.547	634.5	632.5	634.5
	0.548	629	631.5	636
	0.549	635.5	629.5	636.5
	0.55	631	630.5	632.5
	0.551	629	632.5	632.5
	0.552	629	632.5	629.5
	0.553	632.5	631	635
	0.554	633	629.5	635.5
	0.555	631	631.5	632.5
	0.556	630	629	633.5
	0.557	629.5	632.5	632
	0.558	630.5	631.5	632.5
	0.559	629	628.5	635.5
	0.56	630	629	631.5
	0.561	626.5	629	633.5
	0.562	630.5	629	629.5
	0.563	632	632	631.5
	0.564	630	634.5	633.5
	0.565	632.5	631.5	634
	0.566	627	636.5	632
	0.567	629	633.5	631.5
	0.568	632	632	635.5
	0.569	629.5	631	629
	0.57	630	633.5	629.5
	0.571	629	634	632.5
	0.572	629.5	634	632
	0.573	629.5	632.5	631.5
	0.574	629.5	632.5	630.5
	0.575	628.5	630	629
	0.576	627.5	630.5	629.5
	0.577	626	632	629
	0.578	629	634.5	629
	0.579	628.5	634.5	632.5
	0.58	624.5	632.5	630
	0.581	631	634.5	632
	0.582	628	631	632
	0.583	631	633.5	629.5
	0.584	630.5	636	630.5
	0.585	629.5	634	628
	0.586	629	635.5	629
	0.587	629.5	632	629
	0.588	629.5	631.5	629.5
	0.589	627	635	629.5
	0.59	634.5	631.5	631
	0.591	631.5	630.5	632
	0.592	630.5	630.5	630
	0.593	630	632	633.5
	0.594	631.5	629	630
	0.595	628.5	630.5	627
	0.596	627	634	626.5
	0.597	632.5	632	631.5
	0.598	630	635.5	630.5
	0.599	632	632.5	632.5
	0.6	631	633.5	629
	0.601	628	635	632.5
	0.602	630	633.5	629.5
	0.603	630	632.5	631
	0.604	631	632.5	632.5
	0.605	631	630.5	633.5
	0.606	629	632	635
	0.607	631	630.5	632.5
	0.608	631	630.5	634.5
	0.609	632.5	633.5	634
	0.61	627.5	631.5	632.5
	0.611	629	632	630.5
	0.612	632.5	634	631.5
	0.613	634	635.5	631
	0.614	632.5	631	632.5
	0.615	633.5	630.5	632.5
	0.616	630	627.5	633.5
	0.617	632.5	631.5	629
	0.618	630	629	634.5
	0.619	628.5	632.5	632
	0.62	632	631.5	631.5
	0.621	630	631	630
	0.622	631.5	632	631
	0.623	632	634.5	630.5
	0.624	632.5	630	629.5
	0.625	633.5	632.5	628.5
	0.626	631.5	629	631
	0.627	632	632.5	631.5
	0.628	630.5	631	632.5
	0.629	630.5	631	632.5
	0.63	632	630	631.5
	0.631	632.5	631.5	632.5
	0.632	631	629	632.5
	0.633	634	632.5	631
	0.634	631.5	632.5	629.5
	0.635	632.5	635	632.5
	0.636	631.5	632.5	631.5
	0.637	632.5	631	629.5
	0.638	634.5	631.5	630
	0.639	632.5	634	629.5
	0.64	634	629	629
	0.641	635.5	629	632.5
	0.642	633	630.5	630.5
	0.643	632.5	630	628
	0.644	629	631.5	629
	0.645	631.5	632.5	631
	0.646	631	631	631
	0.647	630.5	629.5	630
	0.648	635.5	630.5	628.5
	0.649	630.5	627	629
	0.65	634.5	628	625
	0.651	633.5	630.5	627.5
	0.652	635	632.5	628.5
	0.653	632.5	630.5	624
	0.654	629.5	630.5	624.5
	0.655	636	634	627
	0.656	629	626	624
	0.657	632.5	629	627
	0.658	631	629.5	625
	0.659	629.5	632	627
	0.66	634.5	629	626
	0.661	632.5	630	629
	0.662	634.5	629	629
	0.663	631.5	629	626.5
	0.664	629.5	630.5	628
	0.665	635	627	629.5
	0.666	629.5	631	626.5
	0.667	630.5	632.5	625
	0.668	629.5	629	627.5
	0.669	631	630	629
	0.67	632	629.5	624.5
	0.671	629.5	629.5	628
	0.672	629.5	631	628.5
	0.673	630.5	629.5	625
	0.674	629.5	632.5	627.5
	0.675	627.5	629	628.5
	0.676	628.5	628	623
	0.677	632.5	629	629
	0.678	627.5	630.5	626
	0.679	628	630.5	626
	0.68	629	628.5	626.5
	0.681	633.5	629	630
	0.682	628.5	629	626
	0.683	630.5	632	628
	0.684	630	630	626
	0.685	628	629.5	627
	0.686	632.5	628.5	628
	0.687	628	626.5	628
	0.688	632.5	629.5	627
	0.689	628.5	627	625.5
	0.69	625.5	626.5	628.5
	0.691	629	627.5	629.5
	0.692	633	630.5	628
	0.693	630	628.5	629
	0.694	630.5	627.5	627
	0.695	628.5	626	629
	0.696	626	626	630.5
	0.697	632.5	628.5	630
	0.698	630	629	631.5
	0.699	629.5	626.5	626.5
	0.7	631.5	625.5	629
	0.701	632.5	626.5	628.5
	0.702	632.5	623.5	629.5
	0.703	631	624.5	632.5
	0.704	629.5	622	631.5
	0.705	630.5	630.5	630
	0.706	630.5	623.5	629.5
	0.707	629	623.5	627.5
	0.708	632	628.5	630
	0.709	629	625	631.5
	0.71	629	627.5	630
	0.711	630	623.5	630.5
	0.712	632.5	623	630.5
	0.713	631.5	626.5	632
	0.714	632	626	632.5
	0.715	631	627.5	631
	0.716	629.5	628	633.5
	0.717	635	625.5	631
	0.718	632.5	629	628.5
	0.719	629	624	632.5
	0.72	632	626	632.5
	0.721	634	628	632.5
	0.722	631	626.5	631.5
	0.723	632.5	627.5	634
	0.724	630	627	632.5
	0.725	632.5	624.5	632.5
	0.726	627.5	629	630.5
	0.727	631.5	630	636
	0.728	632	625	632.5
	0.729	629	626	631.5
	0.73	631	632	632
	0.731	633.5	629	631.5
	0.732	633.5	629.5	633.5
	0.733	632	624	632.5
	0.734	628.5	628.5	636.5
	0.735	631.5	629.5	632.5
	0.736	631	630	633.5
	0.737	632	630.5	634
	0.738	629	627.5	634.5
	0.739	629.5	629.5	633.5
	0.74	632.5	631	635.5
	0.741	630	629	631.5
	0.742	630.5	629	637
	0.743	629	625	631.5
	0.744	630	632	632.5
	0.745	631.5	633.5	634.5
	0.746	631	629	631
	0.747	629	631	632.5
	0.748	629	629	634.5
	0.749	626.5	632	635
	0.75	629	631.5	632.5
	0.751	630	633.5	632.5
	0.752	628.5	632.5	634.5
	0.753	629	628.5	634.5
	0.754	629	629	634.5
	0.755	629	632.5	632
	0.756	630	634.5	634
	0.757	631	635	631.5
	0.758	630.5	629.5	634.5
	0.759	631	633.5	630
	0.76	628	632.5	635
	0.761	630.5	632.5	634.5
	0.762	629	630.5	632
	0.763	630.5	629	631
	0.764	625.5	631	627
	0.765	628.5	632.5	635.5
	0.766	627	632	632
	0.767	628	630	631
	0.768	632.5	627	632.5
	0.769	628.5	632	632.5
	0.77	630.5	631	634.5
	0.771	630	631.5	634.5
	0.772	630.5	632.5	632.5
	0.773	630.5	630.5	632.5
	0.774	631.5	630.5	636
	0.775	631.5	630	636
	0.776	629	628	632
	0.777	635	629	631
	0.778	628.5	631	633
	0.779	629.5	631	631
	0.78	629.5	629	632.5
	0.781	632.5	630	630
	0.782	635	632.5	634
	0.783	632.5	628.5	635.5
	0.784	634.5	626.5	635.5
	0.785	628	628.5	634
	0.786	628	629	631.5
	0.787	632.5	631	632
	0.788	632.5	629	634
	0.789	630.5	630.5	632.5
	0.79	629	630	631.5
	0.791	630.5	631	632
	0.792	634.5	629	633.5
	0.793	632	632.5	635.5
	0.794	630.5	628.5	630.5
	0.795	630.5	629.5	632.5
	0.796	628.5	629.5	632
	0.797	630	626	631
	0.798	632	627.5	633.5
	0.799	628	630.5	632.5
	0.8	630	627	632
	0.801	631.5	629.5	633.5
	0.802	629.5	631.5	629
	0.803	629	628	635.5
	0.804	634.5	628.5	632.5
	0.805	629	628.5	632
	0.806	634	630	634
	0.807	633.5	628	630.5
	0.808	635	626	632
	0.809	632	629	628
	0.81	635	629.5	631.5
	0.811	631.5	631.5	630
	0.812	631	631	630.5
	0.813	631	631.5	631.5
	0.814	631.5	633.5	630
	0.815	632	633.5	629
	0.816	635.5	633.5	632.5
	0.817	629.5	628.5	631
	0.818	630	631	628.5
	0.819	630	630.5	630.5
	0.82	631.5	630.5	632.5
	0.821	630	634.5	630
	0.822	631	631	632.5
	0.823	631.5	630.5	631
	0.824	634	634.5	629
	0.825	628	634.5	629
	0.826	630.5	629	629.5
	0.827	631	630	630
	0.828	630	630	629.5
	0.829	629	629	630.5
	0.83	631	632.5	630.5
	0.831	632	629	630
	0.832	630	634.5	630.5
	0.833	629	637	629
	0.834	629	634.5	627.5
	0.835	631.5	632.5	629
	0.836	631.5	629	630.5
	0.837	629.5	632.5	628
	0.838	630.5	635	628.5
	0.839	630.5	636	630
	0.84	632.5	633.5	628.5
	0.841	633.5	630.5	628
	0.842	631.5	632.5	628.5
	0.843	628	635	629
	0.844	631.5	632.5	627.5
	0.845	631	631	626
	0.846	629	634	628.5
	0.847	631.5	630	632
	0.848	629.5	632.5	628.5
	0.849	630.5	634	630
	0.85	632.5	631	628
	0.851	629.5	634	629
	0.852	628	632	628.5
	0.853	626.5	629.5	630
	0.854	632	631	629
	0.855	630.5	634	625
	0.856	630.5	631.5	628.5
	0.857	634.5	630.5	628
	0.858	633.5	632	629
	0.859	629.5	630.5	628.5
	0.86	632	629	629
	0.861	629	629	630
	0.862	630	629	634
	0.863	630.5	634	630
	0.864	630	634	628.5
	0.865	631	629	630.5
	0.866	632	630.5	632.5
	0.867	634.5	627.5	631.5
	0.868	629.5	632.5	631
	0.869	632.5	632	629.5
	0.87	632.5	628	627.5
	0.871	632	628	628.5
	0.872	630	627	632.5
	0.873	634.5	631.5	629.5
	0.874	630	630	627
	0.875	632	629	631
	0.876	634.5	630.5	629
	0.877	633.5	629	630.5
	0.878	634	626.5	627
	0.879	632.5	629	635
	0.88	629	630.5	630
	0.881	632.5	631.5	631
	0.882	630.5	629.5	630.5
	0.883	634.5	630.5	630
	0.884	634	631.5	628
	0.885	632.5	629.5	631.5
	0.886	632.5	629	634
	0.887	630.5	631.5	632.5
	0.888	633.5	629	634.5
	0.889	632.5	632	633.5
	0.89	630	631	635.5
	0.891	633.5	629	632.5
	0.892	635.5	629.5	629.5
	0.893	629	629.5	631.5
	0.894	633	632	632.5
	0.895	629.5	632.5	636
	0.896	634.5	629	632.5
	0.897	631.5	632	633.5
	0.898	631.5	629.5	631
	0.899	634.5	632.5	632
	0.9	632.5	635.5	634.5
	0.901	632.5	630	634
	0.902	629	633.5	632
	0.903	629.5	630	636
	0.904	635	632	632.5
	0.905	631	634	632.5
	0.906	631	632.5	632.5
	0.907	629	629	632
	0.908	631.5	632.5	634
	0.909	635	634.5	634
	0.91	629	632.5	632.5
	0.911	631.5	628.5	632
	0.912	630.5	632	636
	0.913	634.5	633.5	632
	0.914	632	633.5	633
	0.915	632	636	628
	0.916	632.5	632.5	630
	0.917	632.5	630	630.5
	0.918	632	632	634
	0.919	631	635	634
	0.92	632.5	630.5	632.5
	0.921	632.5	632.5	631
	0.922	629	631	631
	0.923	629	634	629
	0.924	632.5	630	635.5
	0.925	632	632.5	634
	0.926	634	633.5	632
	0.927	631.5	631.5	632
	0.928	628.5	634	634.5
	0.929	632.5	632.5	635.5
	0.93	632.5	632.5	631
	0.931	627.5	631	636
	0.932	631.5	631	632.5
	0.933	631	631.5	631
	0.934	635	632	634
	0.935	631	632	635.5
	0.936	632	629.5	629.5
	0.937	631	629	630
	0.938	630	634	631.5
	0.939	628.5	630	631.5
	0.94	632.5	629	631.5
	0.941	632	631	631
	0.942	632.5	628.5	632
	0.943	631	630	632
	0.944	630	632.5	629.5
	0.945	629	633.5	632
	0.946	632.5	629	633.5
	0.947	630.5	630.5	635.5
	0.948	632.5	632	632.5
	0.949	630	629.5	631
	0.95	632	632	632
	0.951	632	629	631.5
	0.952	630.5	627.5	631.5
	0.953	632.5	630.5	631
	0.954	632.5	627.5	632
	0.955	633.5	628.5	629.5
	0.956	629	626.5	628
	0.957	633.5	628	633
	0.958	631	629.5	632.5
	0.959	632.5	627	626.5
	0.96	631	629.5	630
	0.961	632	626.5	632.5
	0.962	631	628.5	630
	0.963	631.5	627.5	634.5
	0.964	630	629	633
	0.965	629.5	626.5	632.5
	0.966	632.5	620.5	633.5
	0.967	634	627	633
	0.968	631	629	629
	0.969	631	629	631
	0.97	632	627	633.5
	0.971	632.5	628	631.5
	0.972	638	626.5	635
	0.973	635.5	629	634
	0.974	633.5	626.5	629.5
	0.975	630.5	623.5	631.5
	0.976	635.5	625	631.5
	0.977	632.5	626	633.5
	0.978	630.5	626.5	631.5
	0.979	634	629	631.5
	0.98	632.5	627	632.5
	0.981	633	623	633.5
	0.982	634	627.5	630.5
	0.983	635	628	631.5
	0.984	633.5	627	634.5
	0.985	634.5	627	632.5
	0.986	631	629	633
	0.987	632.5	628.5	631.5
	0.988	632	625	630.5
	0.989	630.5	627	634
	0.99	632	627	632
	0.991	633.5	629	632.5
	0.992	631	630	632.5
	0.993	629.5	630	631
	0.994	631	629	631.5
	0.995	630.5	629.5	634
	0.996	630.5	629	632.5
	0.997	630.5	632.5	628.5
	0.998	629.5	630	634
	0.999	632.5	631	632
	1	629	631	629
	1.001	630	629	629.5
	1.002	629	633	629.5
	1.003	631.5	632	631.5
	1.004	627.5	633.5	632
	1.005	628	634	632.5
	1.006	632.5	632.5	629
	1.007	629.5	637	634
	1.008	626.5	634.5	629
	1.009	628	632.5	629
	1.01	628.5	632.5	629.5
	1.011	627	633.5	630
	1.012	628	638	634.5
	1.013	628.5	632.5	633.5
	1.014	625	633.5	634.5
	1.015	629	636	629.5
	1.016	630.5	636.5	627
	1.017	623	634.5	631.5
	1.018	628.5	636	630.5
	1.019	624	634.5	630
	1.02	625	632	632.5
	1.021	624	636.5	630
	1.022	626.5	634.5	630
	1.023	627	634.5	630.5
	1.024	626.5	634.5	630
	1.025	624.5	632.5	629.5
	1.026	624	630	630
	1.027	625	636	630.5
	1.028	629.5	632	629
	1.029	626.5	631	628.5
	1.03	625	632.5	627
	1.031	625	635.5	630
	1.032	629	634	629.5
	1.033	626.5	635.5	626.5
	1.034	626.5	629.5	629
	1.035	624.5	632.5	631
	1.036	627	631	631
	1.037	627.5	630.5	630.5
	1.038	630	634.5	630.5
	1.039	627	632.5	632
	1.04	628.5	632.5	630.5
	1.041	628	629	632.5
	1.042	625	631.5	628
	1.043	624.5	631	630
	1.044	627.5	630.5	628.5
	1.045	629.5	630	629
	1.046	628	630	628.5
	1.047	629	632	634
	1.048	631	630.5	628
	1.049	629	629.5	631
	1.05	627	627.5	629
	1.051	630	627.5	632.5
	1.052	630	627.5	632
	1.053	631.5	628.5	632.5
	1.054	629	628.5	632
	1.055	626.5	628.5	632
	1.056	628.5	630	630.5
	1.057	628.5	632.5	632.5
	1.058	629	632.5	634
	1.059	634	627.5	632
	1.06	629.5	629	629
	1.061	630	631.5	632
	1.062	629	628.5	636.5
	1.063	627	628	631
	1.064	634	628	629
	1.065	633.5	629	632
	1.066	635	631	632.5
	1.067	631	627.5	636
	1.068	635	630	635.5
	1.069	630.5	628	634.5
	1.07	634.5	632.5	638
	1.071	632	630.5	636
	1.072	632.5	630	637
	1.073	631	630.5	639.5
	1.074	632.5	628.5	635.5
	1.075	632	626.5	637.5
	1.076	630.5	630	638.5
	1.077	634.5	630	639.5
	1.078	634	634	641
	1.079	632.5	634.5	638.5
	1.08	634.5	629.5	638.5
	1.081	631	633.5	637.5
	1.082	633.5	630	643
	1.083	631	633	641
	1.084	632.5	631	641
	1.085	631.5	632.5	640
	1.086	634	632	640
	1.087	632	634	641
	1.088	631	633.5	642.5
	1.089	634	635	642.5
	1.09	632.5	635	642.5
	1.091	631.5	635	642
	1.092	634	631.5	644
	1.093	632.5	634	641
	1.094	635	637.5	642.5
	1.095	630	632.5	643.5
	1.096	636	636	643
	1.097	632.5	636.5	643.5
	1.098	633.5	634.5	646.5
	1.099	634	636	641
	1.1	632	636	644
	1.101	633.5	632.5	641.5
	1.102	632	632.5	644
	1.103	632.5	634.5	643
	1.104	629.5	634.5	643.5
	1.105	630.5	637	643
	1.106	632	637	641.5
	1.107	631.5	636	643.5
	1.108	632.5	631.5	643.5
	1.109	633.5	635.5	641.5
	1.11	631	634.5	641.5
	1.111	632.5	635.5	647
	1.112	632.5	632.5	643
	1.113	632.5	634	643.5
	1.114	632	637.5	640.5
	1.115	630	632	640
	1.116	633	632.5	645.5
	1.117	627.5	632.5	642.5
	1.118	630.5	630.5	642
	1.119	630.5	634.5	642.5
	1.12	632.5	632.5	644.5
	1.121	629	635.5	643
	1.122	630	632.5	642
	1.123	632	632.5	639
	1.124	630	630.5	641
	1.125	631.5	634.5	641
	1.126	626.5	631	644
	1.127	629	630.5	643
	1.128	628	630.5	646
	1.129	630.5	630.5	645
	1.13	627.5	629	645
	1.131	632.5	630.5	646.5
	1.132	629	629.5	643
	1.133	629.5	629	646.5
	1.134	631.5	627.5	643.5
	1.135	629	630	645.5
	1.136	629.5	629	643
	1.137	630.5	629	646
	1.138	629.5	629.5	646.5
	1.139	631	627.5	645.5
	1.14	632	630	647.5
	1.141	628	626.5	646
	1.142	629.5	629.5	646.5
	1.143	629.5	627	647
	1.144	628	630	647.5
	1.145	632.5	627	647.5
	1.146	627.5	629.5	647
	1.147	632.5	626.5	647.5
	1.148	633.5	632.5	647.5
	1.149	633.5	629.5	645.5
	1.15	632.5	631.5	647.5
	1.151	632.5	630.5	646.5
	1.152	632.5	630	647
	1.153	631.5	630.5	647.5
	1.154	632	624.5	645.5
	1.155	631	629.5	644
	1.156	634	629	652
	1.157	632	629	651
	1.158	634	633	654
	1.159	634.5	628	652
	1.16	631.5	629.5	654.5
	1.161	634.5	632.5	652.5
	1.162	630	630.5	655
	1.163	636	632	656.5
	1.164	632	629.5	658.5
	1.165	636	631	656.5
	1.166	632.5	628	655
	1.167	638.5	632.5	657.5
	1.168	635.5	630	656.5
	1.169	635	630.5	657
	1.17	636	634	656.5
	1.171	632.5	631	660.5
	1.172	634.5	629	659.5
	1.173	637.5	628	660.5
	1.174	636	629	662
	1.175	633.5	626.5	661.5
	1.176	632.5	630.5	659
	1.177	636	628.5	660.5
	1.178	635.5	629	662.5
	1.179	632.5	630	663.5
	1.18	632.5	629	659
	1.181	635.5	630	664
	1.182	632.5	632	662.5
	1.183	634.5	629	659
	1.184	631.5	630.5	661.5
	1.185	634.5	632.5	662
	1.186	631	631	665.5
	1.187	629.5	628	659.5
	1.188	632.5	633	664
	1.189	631	632	663.5
	1.19	634	630.5	662.5
	1.191	632.5	632.5	662.5
	1.192	632.5	632.5	665
	1.193	631.5	631.5	662.5
	1.194	635	632.5	665
	1.195	632	630.5	665
	1.196	630.5	632.5	662.5
	1.197	633.5	636	662
	1.198	630.5	637.5	660
	1.199	630.5	636	661
	1.2	631.5	636	661
	1.201	632.5	638	662
	1.202	632.5	638	660.5
	1.203	627	638.5	659.5
	1.204	630	639	659.5
	1.205	629	638	654.5
	1.206	629	636.5	655
	1.207	633.5	636	656.5
	1.208	631.5	641	654
	1.209	632.5	642	653
	1.21	632.5	641.5	656.5
	1.211	632.5	641	654.5
	1.212	632.5	643	652.5
	1.213	627.5	643.5	650
	1.214	629	647.5	647
	1.215	628	643.5	647.5
	1.216	630.5	644.5	647
	1.217	628	645	643
	1.218	631.5	647.5	644
	1.219	632.5	646.5	643.5
	1.22	632.5	647.5	643
	1.221	630.5	647.5	644.5
	1.222	632.5	647.5	640
	1.223	630.5	649.5	636.5
	1.224	630.5	647.5	640.5
	1.225	629	647.5	638.5
	1.226	631	653	635
	1.227	629	653	634.5
	1.228	630.5	653.5	631.5
	1.229	628	654	630
	1.23	629.5	653	629
	1.231	632.5	656.5	629
	1.232	632.5	655	629.5
	1.233	629.5	656	627
	1.234	630	655.5	623.5
	1.235	631.5	657	624.5
	1.236	631	659.5	621
	1.237	630	659	622.5
	1.238	630	662	619
	1.239	632	660.5	615.5
	1.24	632.5	666.5	617
	1.241	631	665.5	617.5
	1.242	629.5	666	611.5
	1.243	634.5	666.5	610.5
	1.244	632.5	668	608
	1.245	632.5	666	608.5
	1.246	631.5	667.5	607.5
	1.247	634.5	670	608
	1.248	635	664.5	602.5
	1.249	636.5	666	602.5
	1.25	632.5	667.5	602.5
	1.251	634	663.5	593.5
	1.252	634	665	598
	1.253	635.5	663.5	591.5
	1.254	635.5	661	588
	1.255	637	659.5	584.5
	1.256	636	660	583
	1.257	636	656.5	582
	1.258	636	660.5	582
	1.259	636.5	658.5	578
	1.26	635	655	572.5
	1.261	637	654.5	571.5
	1.262	637.5	654.5	566.5
	1.263	639.5	654	563
	1.264	638.5	647.5	558
	1.265	637.5	645.5	558
	1.266	637.5	647	553.5
	1.267	641	647.5	548.5
	1.268	639.5	644	543.5
	1.269	639	643	542.5
	1.27	642.5	639	540.5
	1.271	641.5	644.5	533.5
	1.272	640	641	532.5
	1.273	640.5	639	528
	1.274	640	636	523.5
	1.275	640	636	525
	1.276	640	634	518
	1.277	641.5	632.5	517
	1.278	640	634	513
	1.279	643	627	509
	1.28	643	627.5	507.5
	1.281	641	627	508
	1.282	641	624.5	506
	1.283	643	624	498.5
	1.284	642	622.5	497
	1.285	644.5	622	493.5
	1.286	641	621.5	495.5
	1.287	641.5	617.5	490.5
	1.288	643	622	487
	1.289	641.5	617	486.5
	1.29	643.5	617.5	481.5
	1.291	641.5	611.5	479.5
	1.292	645	609.5	473.5
	1.293	644.5	610	471
	1.294	645.5	608.5	471
	1.295	647.5	605	465
	1.296	647	606.5	461
	1.297	644	606.5	456
	1.298	647	604	452
	1.299	650	599	446.5
	1.3	645	600.5	444.5
	1.301	650	595.5	441.5
	1.302	647.5	599	437.5
	1.303	652	595	434
	1.304	647.5	593	428
	1.305	651.5	593.5	422
	1.306	650.5	588	418.5
	1.307	650	588	409
	1.308	651	584.5	407.5
	1.309	647.5	580.5	404.5
	1.31	652	580.5	396
	1.311	654.5	574.5	392
	1.312	651	575	386
	1.313	654	569	378.5
	1.314	653	569.5	373
	1.315	652.5	566.5	367
	1.316	655	564.5	361.5
	1.317	654	563.5	355.5
	1.318	656	560.5	348
	1.319	656.5	556.5	343.5
	1.32	656.5	554	341
	1.321	655.5	552.5	330
	1.322	657	548	323.5
	1.323	659.5	547	314.5
	1.324	655	542	309
	1.325	660	539.5	304.5
	1.326	654.5	535.5	297
	1.327	655	535.5	294
	1.328	657.5	533	287.5
	1.329	659	528	281.5
	1.33	653	524.5	276.5
	1.331	657	521	267
	1.332	656.5	519	259.5
	1.333	659.5	517.5	258.5
	1.334	657	513	251
	1.335	653.5	514.5	242
	1.336	653.5	509.5	240.5
	1.337	654.5	504.5	232
	1.338	651.5	504	228
	1.339	657	497	222.5
	1.34	655	493	219
	1.341	656	491	213.5
	1.342	654.5	485.5	205
	1.343	654.5	480.5	200
	1.344	650.5	476	197
	1.345	650	476.5	192.5
	1.346	650	468.5	191.5
	1.347	647.5	467	185
	1.348	646	462.5	184
	1.349	646.5	460	180
	1.35	645	455	177
	1.351	647	445	174
	1.352	639	443.5	171.5
	1.353	641.5	438.5	172
	1.354	638.5	430.5	169.5
	1.355	638.5	425.5	168.5
	1.356	638.5	420	168
	1.357	631.5	413.5	163.5
	1.358	633.5	410	162
	1.359	630	402	160
	1.36	628.5	396	157.5
	1.361	629	385	157
	1.362	627.5	385.5	155
	1.363	622	376	153.5
	1.364	619.5	368	150
	1.365	619.5	362	149.5
	1.366	616.5	352.5	148.5
	1.367	613	345	146
	1.368	612	335	144
	1.369	609	328	139.5
	1.37	612	317.5	142.5
	1.371	607.5	314.5	137
	1.372	602.5	301	134
	1.373	602.5	295	131
	1.374	601.5	284.5	133.5
	1.375	597.5	275.5	129
	1.376	598	267	130.5
	1.377	596.5	260.5	129
	1.378	596	250.5	123
	1.379	592	244	122.5
	1.38	588	233.5	118.5
	1.381	583.5	225.5	120.5
	1.382	581	218.5	119.5
	1.383	582	207.5	116
	1.384	576.5	204	116
	1.385	576	193	117.5
	1.386	574.5	186.5	112
	1.387	571.5	178.5	109
	1.388	568	170	109
	1.389	568	161.5	105.5
	1.39	561.5	160	104.5
	1.391	561	154	102.5
	1.392	562.5	144.5	101.5
	1.393	553	140	101.5
	1.394	553.5	137	102.5
	1.395	553.5	133	96.5
	1.396	552.5	126.5	96
	1.397	547	126	98
	1.398	547	114	91.5
	1.399	545.5	115.5	92.5
	1.4	541	113	92
	1.401	542	110.5	91.5
	1.402	540	109.5	89.5
	1.403	537.5	109.5	90
	1.404	536	104.5	87.5
	1.405	535.5	102.5	85.5
	1.406	533	103	86.5
	1.407	533.5	102.5	82.5
	1.408	528	104.5	83.5
	1.409	526.5	101	83.5
	1.41	526.5	99.5	85
	1.411	521	96	82
	1.412	520	97.5	80
	1.413	517.5	94.5	82.5
	1.414	517	92	81
	1.415	513	93.5	80
	1.416	512	91.5	73
	1.417	506.5	89	79
	1.418	505.5	88.5	78
	1.419	502	87	76
	1.42	494	85	73
	1.421	495	83.5	75
	1.422	489.5	80.5	72
	1.423	487	82.5	73
	1.424	482.5	83.5	75.5
	1.425	479	80.5	74
	1.426	471	79.5	72.5
	1.427	466	79.5	72.5
	1.428	463	77.5	75.5
	1.429	456.5	75.5	69
	1.43	450.5	73.5	69
	1.431	443	74	67.5
	1.432	438.5	73	68.5
	1.433	433	72	71
	1.434	428.5	70.5	67.5
	1.435	417.5	71	66
	1.436	414	67.5	67
	1.437	405.5	65.5	67.5
	1.438	396.5	65.5	70.5
	1.439	390.5	61.5	65.5
	1.44	379.5	64	64
	1.441	377	62	65.5
	1.442	368	60.5	65.5
	1.443	362	58.5	64
	1.444	352	57.5	68
	1.445	345.5	54.5	61.5
	1.446	337.5	58.5	63
	1.447	329	56	64
	1.448	319.5	54.5	63
	1.449	313	55.5	62.5
	1.45	304.5	55.5	68
	1.451	295	51.5	63
	1.452	290.5	51	62
	1.453	281.5	53.5	66
	1.454	270.5	49	68
	1.455	265	50.5	68
	1.456	259.5	51	66.5
	1.457	255	49.5	68
	1.458	244.5	47	67.5
	1.459	239	49.5	70.5
	1.46	232.5	48	65.5
	1.461	230	50.5	67.5
	1.462	224	51	68
	1.463	215.5	47.5	70
	1.464	210.5	49.5	73.5
	1.465	205.5	49.5	71.5
	1.466	204	56	72.5
	1.467	200	56	76
	1.468	198	52.5	78.5
	1.469	195	54.5	79
	1.47	191.5	51	78
	1.471	189	53.5	80.5
	1.472	186	51	80.5
	1.473	184.5	54.5	82.5
	1.474	184	54.5	87.5
	1.475	181.5	55.5	90
	1.476	178.5	57.5	92
	1.477	174.5	57	93
	1.478	173	57	95.5
	1.479	169	58	96.5
	1.48	166.5	61	98
	1.481	166.5	62	104.5
	1.482	165.5	62	106.5
	1.483	164	66.5	110
	1.484	160	62.5	114.5
	1.485	162.5	61	119.5
	1.486	156.5	66.5	119
	1.487	153.5	66	129.5
	1.488	154.5	70	135.5
	1.489	154	69	142
	1.49	149	70.5	145.5
	1.491	146.5	71.5	155.5
	1.492	147.5	72.5	158
	1.493	147.5	75	164.5
	1.494	142.5	75.5	173
	1.495	148	77	181
	1.496	140.5	75	190
	1.497	143.5	75.5	198
	1.498	136.5	77.5	208.5
	1.499	138.5	77	222.5
	1.5	140	82	229.5
	1.501	135	79	242
	1.502	130	82	257.5
	1.503	131	82.5	270.5
	1.504	127	88.5	284.5
	1.505	131.5	88	301.5
	1.506	123	88.5	312.5
	1.507	124	88.5	326.5
	1.508	125.5	93	341
	1.509	119	92.5	351
	1.51	118.5	96.5	364.5
	1.511	116	99	378.5
	1.512	116	104	389.5
	1.513	116	103.5	403.5
	1.514	112	106.5	412
	1.515	111.5	108.5	427
	1.516	110	115.5	440.5
	1.517	108	116	449
	1.518	109	118	461.5
	1.519	105.5	125.5	477
	1.52	104.5	127.5	494.5
	1.521	102.5	129.5	505.5
	1.522	104	136.5	518.5
	1.523	103.5	139.5	537
	1.524	101	144.5	547
	1.525	100.5	151.5	558
	1.526	101	155	574.5
	1.527	95.5	160	582.5
	1.528	95.5	167.5	588
	1.529	94	175.5	596.5
	1.53	96	181.5	602.5
	1.531	95	191.5	610
	1.532	95.5	200	611
	1.533	91	210.5	614.5
	1.534	93.5	222.5	616
	1.535	93	234	617.5
	1.536	92	246	621
	1.537	88.5	259	625
	1.538	88.5	273.5	621.5
	1.539	89	288.5	628
	1.54	89	301	631
	1.541	88	321.5	638
	1.542	84.5	340.5	643.5
	1.543	85	359.5	651
	1.544	84	378	661
	1.545	86	401.5	669
	1.546	83.5	429	679
	1.547	78.5	451.5	688.5
	1.548	82	472	697
	1.549	79	499	707
	1.55	83	518	722
	1.551	80	537	734.5
	1.552	80.5	554	745.5
	1.553	80.5	568.5	757.5
	1.554	77.5	587	772.5
	1.555	83	595.5	782.5
	1.556	82	606.5	796.5
	1.557	77	613.5	809.5
	1.558	78.5	617	826.5
	1.559	79.5	617.5	841
	1.56	77.5	617.5	860
	1.561	77.5	619.5	871
	1.562	77	622.5	886
	1.563	80.5	626	900.5
	1.564	81.5	624	916
	1.565	81	627	930.5
	1.566	83.5	634.5	944.5
	1.567	80.5	634.5	959.5
	1.568	81.5	639.5	980
	1.569	78	643	996.5
	1.57	81.5	647	1009.5
	1.571	81.5	657	1027
	1.572	82	660.5	1045
	1.573	85	673	1059.5
	1.574	84	674.5	1077.5
	1.575	85	688	1092.5
	1.576	90	695	1107
	1.577	88.5	707	1122
	1.578	88.5	716	1142.5
	1.579	91	723	1157.5
	1.58	95.5	737	1169.5
	1.581	93.5	749	1183
	1.582	94	761	1196
	1.583	100.5	777.5	1206
	1.584	98	793	1217.5
	1.585	101	807	1227.5
	1.586	99.5	826.5	1238
	1.587	103	841	1249
	1.588	106	861	1257
	1.589	108	881.5	1266
	1.59	106.5	895	1270.5
	1.591	109.5	912	1280.5
	1.592	113.5	930.5	1283
	1.593	118.5	945.5	1288.5
	1.594	121	962.5	1297
	1.595	125	980.5	1302.5
	1.596	123.5	999	1308.5
	1.597	129.5	1016	1312.5
	1.598	131	1031	1311.5
	1.599	136.5	1050	1323.5
	1.6	137.5	1065	1327
	1.601	142	1087.5	1331
	1.602	142	1102.5	1338.5
	1.603	150	1123	1338
	1.604	153	1145.5	1344.5
	1.605	153.5	1163	1353
	1.606	157	1184	1360.5
	1.607	163	1204	1363
	1.608	166.5	1221	1368.5
	1.609	171.5	1243.5	1373.5
	1.61	177	1264	1381
	1.611	187.5	1281	1384
	1.612	191	1293.5	1391.5
	1.613	200	1318.5	1393
	1.614	210	1334.5	1406
	1.615	225.5	1345.5	1408
	1.616	235	1361	1414.5
	1.617	252.5	1374.5	1418.5
	1.618	263.5	1388.5	1428.5
	1.619	277.5	1400.5	1429.5
	1.62	300.5	1414	1437.5
	1.621	315.5	1422.5	1445
	1.622	334.5	1436.5	1452.5
	1.623	344	1446.5	1461
	1.624	364	1452.5	1463.5
	1.625	376.5	1459	1475
	1.626	392	1467.5	1479
	1.627	403.5	1475	1489
	1.628	417	1482.5	1497.5
	1.629	429	1490	1509.5
	1.63	436	1496.5	1512
	1.631	443.5	1502.5	1524.5
	1.632	450	1511.5	1534
	1.633	452.5	1512	1542
	1.634	456	1521.5	1553
	1.635	457	1524	1562.5
	1.636	464	1531	1573.5
	1.637	466	1534.5	1585
	1.638	468.5	1541.5	1592
	1.639	468	1548	1601.5
	1.64	468.5	1547	1614
	1.641	471.5	1554	1620
	1.642	478.5	1557	1630.5
	1.643	479.5	1567	1641
	1.644	479	1564	1652
	1.645	490.5	1571	1660
	1.646	488.5	1572	1674.5
	1.647	492	1578.5	1679
	1.648	496	1580.5	1688.5
	1.649	497.5	1585.5	1696
	1.65	502.5	1586.5	1703
	1.651	506	1593.5	1706
	1.652	513	1599	1718
	1.653	517.5	1601.5	1721
	1.654	519.5	1609	1734
	1.655	524.5	1611	1738.5
	1.656	528	1612	1743
	1.657	534.5	1616.5	1745.5
	1.658	540	1622.5	1751
	1.659	550.5	1623	1758
	1.66	554.5	1628.5	1761
	1.661	562.5	1631.5	1762
	1.662	571	1635.5	1765.5
	1.663	577.5	1638	1772
	1.664	590.5	1641	1771
	1.665	599	1642.5	1773
	1.666	609	1644.5	1772.5
	1.667	616.5	1645	1775
	1.668	631	1654.5	1774
	1.669	642.5	1654	1776
	1.67	654	1656	1778.5
	1.671	668	1657.5	1777.5
	1.672	680.5	1660.5	1776.5
	1.673	694	1661.5	1778.5
	1.674	704.5	1669	1775.5
	1.675	721.5	1669	1774.5
	1.676	731.5	1672	1772
	1.677	749	1676	1778
	1.678	766.5	1684	1774.5
	1.679	781.5	1684	1777
	1.68	802	1690	1778.5
	1.681	815	1690.5	1773.5
	1.682	829	1700	1779
	1.683	847.5	1705	1780.5
	1.684	865	1706	1780.5
	1.685	882	1710	1780.5
	1.686	900.5	1715.5	1780.5
	1.687	916	1719	1780.5
	1.688	933.5	1720	1780.5
	1.689	955.5	1721	1780.5
	1.69	971	1730	1787
	1.691	990	1730.5	1786.5
	1.692	1005.5	1739	1780.5
	1.693	1028	1736	1780.5
	1.694	1042.5	1741	1780.5
	1.695	1060	1739.5	1778
	1.696	1078.5	1736	1780
	1.697	1092.5	1739.5	1774
	1.698	1107.5	1736	1773
	1.699	1121.5	1738.5	1768.5
	1.7	1136.5	1736	1764.5
	1.701	1152.5	1736	1763.5
	1.702	1165.5	1736	1762.5
	1.703	1175.5	1731	1758
	1.704	1184	1728.5	1751
	1.705	1199	1728.5	1745.5
	1.706	1209	1721	1744.5
	1.707	1218	1721	1739
	1.708	1229	1721	1735
	1.709	1237	1717	1735
	1.71	1244	1720	1721
	1.711	1258.5	1718.5	1721
	1.712	1263	1717.5	1721
	1.713	1272	1713	1714.5
	1.714	1280.5	1710.5	1706
	1.715	1288.5	1709	1703
	1.716	1296.5	1713	1697.5
	1.717	1299.5	1706	1691
	1.718	1308.5	1710.5	1684.5
	1.719	1313	1710	1682
	1.72	1318.5	1715	1671.5
	1.721	1327	1712.5	1668.5
	1.722	1330.5	1712.5	1661.5
	1.723	1333.5	1712	1657
	1.724	1335	1710.5	1648.5
	1.725	1337	1715	1643
	1.726	1344	1710	1643.5
	1.727	1347.5	1715	1636.5
	1.728	1351	1714	1628.5
	1.729	1358	1710.5	1623.5
	1.73	1360.5	1710.5	1616.5
	1.731	1362.5	1711.5	1614.5
	1.732	1363	1706	1609
	1.733	1377	1708.5	1601.5
	1.734	1382.5	1705.5	1598
	1.735	1391.5	1704	1591
	1.736	1393	1704.5	1586.5
	1.737	1404	1700	1579
	1.738	1410.5	1697	1570
	1.739	1416	1696	1567
	1.74	1422.5	1689.5	1562
	1.741	1422.5	1688.5	1557
	1.742	1436.5	1685.5	1554
	1.743	1449	1685.5	1542
	1.744	1450	1682.5	1542
	1.745	1464.5	1676	1538.5
	1.746	1471	1672.5	1536
	1.747	1480.5	1673.5	1527
	1.748	1482.5	1661.5	1525
	1.749	1492.5	1661.5	1521
	1.75	1501.5	1661.5	1512
	1.751	1512	1658	1511.5
	1.752	1512	1656	1504.5
	1.753	1522.5	1650	1497.5
	1.754	1536.5	1646.5	1495.5
	1.755	1539	1645	1490.5
	1.756	1542	1640	1490
	1.757	1554	1631.5	1480.5
	1.758	1562.5	1630	1474.5
	1.759	1570.5	1627	1471
	1.76	1579	1616.5	1467.5
	1.761	1586.5	1615	1466
	1.762	1595.5	1615	1462
	1.763	1601.5	1609	1458
	1.764	1611.5	1600	1456.5
	1.765	1620	1599.5	1452.5
	1.766	1622.5	1593.5	1452
	1.767	1636.5	1586.5	1448
	1.768	1644.5	1584.5	1446
	1.769	1649	1582.5	1447
	1.77	1660.5	1580.5	1442.5
	1.771	1660.5	1577.5	1446.5
	1.772	1661.5	1578	1442.5
	1.773	1676	1576	1442
	1.774	1676	1573.5	1437.5
	1.775	1682.5	1572	1436.5
	1.776	1690	1570	1436.5
	1.777	1690	1569	1436.5
	1.778	1695.5	1569	1434.5
	1.779	1699.5	1569.5	1435.5
	1.78	1703.5	1570.5	1431.5
	1.781	1706	1567.5	1431.5
	1.782	1709	1566	1429
	1.783	1706	1564.5	1429.5
	1.784	1713	1563.5	1429.5
	1.785	1713	1563.5	1422.5
	1.786	1716.5	1562.5	1429.5
	1.787	1716.5	1564	1432
	1.788	1713.5	1556.5	1422.5
	1.789	1715.5	1556	1431.5
	1.79	1715.5	1557	1422.5
	1.791	1716.5	1557	1429.5
	1.792	1717	1557	1435
	1.793	1716.5	1554.5	1432
	1.794	1719.5	1559.5	1433
	1.795	1717	1557	1435.5
	1.796	1721	1564.5	1435
	1.797	1721	1559.5	1436.5
	1.798	1721	1561	1437.5
	1.799	1727	1561.5	1442
	1.8	1721	1561	1440
	1.801	1727.5	1560.5	1441
	1.802	1727	1563	1445
	1.803	1728.5	1564.5	1445
	1.804	1734.5	1563.5	1445
	1.805	1734.5	1562.5	1447
	1.806	1734.5	1564	1448
	1.807	1734	1566	1449.5
	1.808	1736	1569	1454
	1.809	1732	1566	1450.5
	1.81	1730.5	1569	1459.5
	1.811	1728.5	1571.5	1458.5
	1.812	1721	1574	1461.5
	1.813	1721	1571	1466.5
	1.814	1718	1578	1467.5
	1.815	1714.5	1578	1470
	1.816	1711	1583.5	1467.5
	1.817	1711	1580	1476
	1.818	1706	1581.5	1481
	1.819	1705	1582	1482.5
	1.82	1703	1583.5	1482.5
	1.821	1699	1583	1482.5
	1.822	1696.5	1583	1492.5
	1.823	1692.5	1582	1490
	1.824	1691	1585.5	1496.5
	1.825	1688.5	1586.5	1501.5
	1.826	1689.5	1585	1497.5
	1.827	1687.5	1585.5	1504.5
	1.828	1683.5	1590.5	1503
	1.829	1680.5	1591.5	1508.5
	1.83	1678.5	1590.5	1510.5
	1.831	1676	1593.5	1512
	1.832	1675	1594.5	1519
	1.833	1673	1596.5	1512
	1.834	1669	1597.5	1519.5
	1.835	1661.5	1600	1522
	1.836	1658	1601.5	1527
	1.837	1653.5	1601.5	1532
	1.838	1653.5	1601.5	1534.5
	1.839	1648.5	1607.5	1538
	1.84	1643	1601.5	1536
	1.841	1639	1607.5	1542
	1.842	1634.5	1610.5	1542
	1.843	1631.5	1614	1542
	1.844	1626	1614.5	1547.5
	1.845	1623	1616.5	1557
	1.846	1619	1616.5	1557
	1.847	1615	1622	1557
	1.848	1609.5	1621	1562.5
	1.849	1601.5	1623.5	1564.5
	1.85	1601.5	1627	1567
	1.851	1601	1627	1567
	1.852	1600.5	1623.5	1569
	1.853	1594	1626.5	1573.5
	1.854	1593.5	1623	1570
	1.855	1588.5	1620.5	1572
	1.856	1586	1620	1574.5
	1.857	1585	1621.5	1570
	1.858	1580.5	1621	1570.5
	1.859	1573.5	1622.5	1572
	1.86	1571.5	1620.5	1571
	1.861	1566	1616.5	1571.5
	1.862	1564	1612.5	1568.5
	1.863	1560.5	1615	1568
	1.864	1553	1614	1568
	1.865	1551	1610.5	1564.5
	1.866	1542	1610.5	1562.5
	1.867	1542	1601.5	1562
	1.868	1542	1601.5	1557
	1.869	1536.5	1599.5	1554
	1.87	1534	1600	1551
	1.871	1531	1591.5	1548.5
	1.872	1524	1586.5	1542
	1.873	1519	1583	1541.5
	1.874	1518.5	1578	1533.5
	1.875	1512	1570.5	1526.5
	1.876	1512	1561.5	1522
	1.877	1507	1557	1518.5
	1.878	1506.5	1552.5	1511.5
	1.879	1504	1542	1503
	1.88	1500	1538	1495.5
	1.881	1497.5	1527	1482.5
	1.882	1496.5	1512	1480
	1.883	1492.5	1508.5	1471
	1.884	1493	1495	1461.5
	1.885	1492.5	1482.5	1447.5
	1.886	1489.5	1471	1436.5
	1.887	1482.5	1459.5	1422.5
	1.888	1482.5	1447	1413
	1.889	1489	1436	1400.5
	1.89	1482.5	1419	1386.5
	1.891	1481	1405.5	1371
	1.892	1478	1390.5	1354
	1.893	1476	1374.5	1339
	1.894	1473	1358	1326
	1.895	1477	1342.5	1309
	1.896	1475	1324.5	1292.5
	1.897	1472	1302	1271.5
	1.898	1467.5	1279	1251.5
	1.899	1471	1262	1226
	1.9	1467.5	1236.5	1204
	1.901	1467	1216.5	1184
	1.902	1467.5	1191	1157.5
	1.903	1467.5	1162.5	1133.5
	1.904	1466.5	1137	1106.5
	1.905	1467.5	1112.5	1079.5
	1.906	1472	1080	1050
	1.907	1471	1048	1022.5
	1.908	1471.5	1020	995
	1.909	1474.5	990	957.5
	1.91	1472.5	958	926
	1.911	1472	925	891.5
	1.912	1476.5	889.5	860.5
	1.913	1477	851.5	819
	1.914	1477.5	814	779.5
	1.915	1480	776.5	736.5
	1.916	1476.5	734	693
	1.917	1476.5	689.5	655.5
	1.918	1482.5	647.5	611
	1.919	1480	602	567
	1.92	1480	558	517
	1.921	1480	510	470.5
	1.922	1482.5	463.5	423
	1.923	1482.5	414	376
	1.924	1482.5	369	332
	1.925	1490	319.5	286
	1.926	1492.5	273.5	243.5
	1.927	1482.5	231.5	197.5
	1.928	1491	189.5	160.5
	1.929	1493	148	125
	1.93	1495.5	110	94.5
	1.931	1495	75	68
	1.932	1497.5	43	48
	1.933	1496	14	24
	1.934	1499.5	-4	12.5
	1.935	1502.5	-24	0.5
	1.936	1500.5	-34	-9.5
	1.937	1502	-43	-14
	1.938	1504.5	-51	-20
	1.939	1509	-48	-24
	1.94	1509.5	-44.5	-24.5
	1.941	1512	-39	-25
	1.942	1512	-35.5	-20
	1.943	1518	-26	-16
	1.944	1521	-12	-10.5
	1.945	1520.5	-7	-5.5
	1.946	1522.5	-1.5	-2
	1.947	1518.5	10.5	-2
	1.948	1521	10.5	0.5
	1.949	1521	11	1
	1.95	1522	10.5	2.5
	1.951	1526	12	1.5
	1.952	1526.5	6.5	-4.5
	1.953	1527	3.5	-3.5
	1.954	1527	-2	-5
	1.955	1529.5	-3	-3
	1.956	1532.5	-4.5	-6.5
	1.957	1535.5	-10	-3
	1.958	1540	-10	-3
	1.959	1540	-7	-5
	1.96	1540.5	-11	-4.5
	1.961	1542	-11.5	-5
	1.962	1549.5	-12.5	-5.5
	1.963	1550	-9.5	-6.5
	1.964	1550.5	-7	-4
	1.965	1550.5	-7.5	-4
	1.966	1556.5	-4.5	-4
	1.967	1557	-1.5	-7
	1.968	1557	-3.5	-7
	1.969	1557	-5	-6
	1.97	1559.5	-1	-3.5
	1.971	1557	0	-3.5
	1.972	1562	0	-2.5
	1.973	1564.5	0.5	-5
	1.974	1565.5	-2.5	-6.5
	1.975	1564	-2.5	-1
	1.976	1567	1.5	-1.5
	1.977	1562.5	-3	-1.5
	1.978	1562	-5.5	-4.5
	1.979	1560.5	-7	-4
	1.98	1559.5	-2.5	-4
	1.981	1553.5	-4.5	-5
	1.982	1555.5	-7.5	-1.5
	1.983	1554	-3	-5
	1.984	1550	-3	-6
	1.985	1542	-3.5	-5
	1.986	1542	-6	-3
	1.987	1539.5	-3.5	-4.5
	1.988	1539.5	0	-2.5
	1.989	1535.5	-5	-1.5
	1.99	1534.5	-5	-2.5
	1.991	1527	-2.5	-0.5
	1.992	1525	-5.5	-3.5
	1.993	1519.5	-4	-6.5
[truncated: 6,006 more rows]

## Sheet: E
DataTypeVer2.0	Time	Fz	Fz	Fz
NumberOfData		15000	15000	15000
PreTriggerData		0	0	0
SamplingTime[ms]		1	1	1
DataLabel		AF1:CMJ	AF2:CMJ	AF3:CMJ
DataUnit	sec	N	N	N
	0	692	691	693.5
	0.001	692.5	691.5	696
	0.002	689	691	690.5
	0.003	690.5	694	689
	0.004	692	693	694.5
	0.005	689.5	690.5	693.5
	0.006	697	696	695
	0.007	690.5	690.5	694
	0.008	688	690.5	689.5
	0.009	691.5	690	690.5
	0.01	690.5	690.5	694
	0.011	694	691.5	693
	0.012	692.5	689	691
	0.013	694	692	693.5
	0.014	697	691.5	692
	0.015	690.5	694	693.5
	0.016	692.5	692.5	693
	0.017	691.5	690	690.5
	0.018	695.5	692	690.5
	0.019	693	694.5	687.5
	0.02	691	691	693
	0.021	693	695.5	694.5
	0.022	693	695.5	694
	0.023	690	692.5	694
	0.024	691.5	694	694.5
	0.025	691.5	694.5	692.5
	0.026	690.5	691.5	691.5
	0.027	691	691	697
	0.028	694	692.5	697
	0.029	689.5	693.5	689
	0.03	690	693	692.5
	0.031	690	695.5	688.5
	0.032	691	695	693.5
	0.033	690.5	693.5	692.5
	0.034	689.5	692	694.5
	0.035	692.5	695	695
	0.036	692	694.5	693
	0.037	692	694.5	694.5
	0.038	692	691.5	694
	0.039	694.5	694	693.5
	0.04	693.5	693.5	694
	0.041	691.5	691.5	690.5
	0.042	694.5	690	695.5
	0.043	694	691.5	695
	0.044	691	693	695
	0.045	690.5	695	695
	0.046	689.5	693.5	695.5
	0.047	693	695.5	694
	0.048	691.5	691.5	695
	0.049	690.5	693.5	696
	0.05	694	691.5	696
	0.051	688.5	696	693
	0.052	690	693	691
	0.053	692	692.5	695
	0.054	692.5	694.5	696
	0.055	692.5	690.5	695.5
	0.056	690.5	692.5	696.5
	0.057	693.5	690.5	692.5
	0.058	693	695	697
	0.059	693.5	692.5	698
	0.06	694	692	695
	0.061	694	692.5	697
	0.062	693.5	696	693.5
	0.063	696	694.5	697.5
	0.064	694.5	693	697
	0.065	693.5	693	696.5
	0.066	695	694.5	695.5
	0.067	691.5	695.5	697.5
	0.068	695	693.5	698.5
	0.069	695	691	695
	0.07	692	691.5	697.5
	0.071	697.5	692.5	699
	0.072	697.5	693	699
	0.073	694.5	694	698
	0.074	698.5	692	701
	0.075	699	691	699
	0.076	697	695	701.5
	0.077	695	689	699.5
	0.078	697	692.5	700
	0.079	696.5	691	699
	0.08	698.5	690.5	699.5
	0.081	695.5	688.5	698
	0.082	695	692	699.5
	0.083	697.5	691	696.5
	0.084	696	691	697.5
	0.085	697.5	691	697
	0.086	697	690.5	698
	0.087	695	691.5	702.5
	0.088	693.5	693	695.5
	0.089	695.5	693	693
	0.09	698	695	700
	0.091	693	691.5	699
	0.092	696.5	691	697.5
	0.093	696	691	697.5
	0.094	694.5	689	697
	0.095	696	687	697.5
	0.096	697	692	695
	0.097	695	690.5	696
	0.098	698	689.5	700
	0.099	695.5	690	697
	0.1	696	689	692.5
	0.101	693.5	691.5	697
	0.102	693.5	691	693
	0.103	698.5	692	696
	0.104	692.5	688.5	694.5
	0.105	696.5	690.5	693.5
	0.106	692.5	691	693.5
	0.107	694.5	687.5	697.5
	0.108	693.5	689.5	696.5
	0.109	689	692	696.5
	0.11	692	688	692.5
	0.111	691.5	691	696.5
	0.112	693	689.5	694
	0.113	695	693	696.5
	0.114	695	691.5	696
	0.115	695.5	693	693
	0.116	697.5	690.5	694
	0.117	692.5	690.5	692
	0.118	695	690.5	694
	0.119	691	691	692
	0.12	692.5	687.5	695
	0.121	694	691.5	693.5
	0.122	693	689.5	694
	0.123	693.5	690.5	693
	0.124	692.5	693.5	693
	0.125	697	691	691.5
	0.126	691	693	695
	0.127	691.5	689.5	691
	0.128	692.5	690.5	693.5
	0.129	694	693	694.5
	0.13	693	691.5	691.5
	0.131	692.5	692	696
	0.132	693.5	692	690
	0.133	696	692	693.5
	0.134	694.5	693.5	689.5
	0.135	690.5	688	693.5
	0.136	693	690.5	695.5
	0.137	693.5	693	694
	0.138	694	693	693.5
	0.139	692.5	692	696
	0.14	691.5	693	693.5
	0.141	694	691	693
	0.142	689.5	692.5	692
	0.143	696.5	696	694
	0.144	695.5	689	691
	0.145	691	690.5	691
	0.146	693	693.5	692.5
	0.147	693	695	693
	0.148	692.5	695	689.5
	0.149	692	697	692
	0.15	693.5	692.5	695
	0.151	692	693	692
	0.152	693.5	694	696
	0.153	690.5	692	694
	0.154	694	694.5	694
	0.155	694.5	697	693
	0.156	694	697.5	693
	0.157	691	694	692.5
	0.158	691	692	694.5
	0.159	693	692.5	694
	0.16	694	694	692.5
	0.161	693	694.5	694.5
	0.162	693.5	691.5	696
	0.163	692.5	693	695
	0.164	696	693	694
	0.165	690.5	696	691.5
	0.166	692.5	694	692
	0.167	690.5	697	694
	0.168	691	694	694.5
	0.169	690	692.5	693
	0.17	690.5	695.5	695
	0.171	693	694.5	695
	0.172	695.5	692.5	693.5
	0.173	690	694.5	693
	0.174	690.5	695	697
	0.175	690.5	697.5	691.5
	0.176	694	695	693
	0.177	694.5	697.5	693.5
	0.178	689	695.5	690.5
	0.179	693	694.5	695.5
	0.18	694	690.5	694
	0.181	691	696	695.5
	0.182	693.5	696	693
	0.183	689.5	692	694
	0.184	690.5	697.5	694
	0.185	690.5	690.5	694
	0.186	690.5	695	695
	0.187	693	692.5	696
	0.188	690.5	694	695.5
	0.189	689.5	694.5	692.5
	0.19	690.5	694	691
	0.191	692.5	694.5	691
	0.192	690.5	695.5	693.5
	0.193	695	693	692.5
	0.194	689.5	693	693.5
	0.195	690	692.5	694
	0.196	689	694	694
	0.197	690.5	694	693
	0.198	691	690.5	692
	0.199	692	693	693
	0.2	691	691.5	691.5
	0.201	692	692	696
	0.202	693.5	692.5	694
	0.203	690.5	693	690.5
	0.204	689.5	691.5	696
	0.205	690	691.5	697
	0.206	691	690.5	691
	0.207	690.5	690.5	695
	0.208	691.5	692.5	690.5
	0.209	693	692.5	694
	0.21	688.5	692.5	690.5
	0.211	693.5	692.5	692.5
	0.212	691	689.5	691.5
	0.213	693	694	693
	0.214	695.5	693.5	689.5
	0.215	693.5	691	692.5
	0.216	690.5	696	689.5
	0.217	691	692.5	690.5
	0.218	692	694	688.5
	0.219	693.5	691.5	693
	0.22	696.5	690.5	690.5
	0.221	692	693	693
	0.222	693.5	693.5	693.5
	0.223	694	694.5	691.5
	0.224	690.5	693.5	689.5
	0.225	695.5	688.5	689
	0.226	692.5	691	690.5
	0.227	693.5	693	689.5
	0.228	690.5	695	691
	0.229	691.5	692.5	688.5
	0.23	692.5	689.5	691
	0.231	695	691	689
	0.232	695.5	694.5	689.5
	0.233	696.5	695.5	690.5
	0.234	694	693	689
	0.235	693	694	691
	0.236	693.5	691	692
	0.237	697	693	692
	0.238	691.5	692	688
	0.239	695	692	690.5
	0.24	695	692	694.5
	0.241	694	694.5	692
	0.242	694	694	691
	0.243	694	694.5	692
	0.244	695.5	692.5	690.5
	0.245	691	692.5	693.5
	0.246	693	691	691
	0.247	694	695.5	692
	0.248	695	693	692.5
	0.249	693.5	696	692
	0.25	692	692.5	690.5
	0.251	691	692	695
	0.252	692	693	689.5
	0.253	694	693	693.5
	0.254	693	692	693.5
	0.255	690.5	694	692
	0.256	693.5	691	693.5
	0.257	695	694	696
	0.258	696.5	695	695
	0.259	695	694.5	694
	0.26	692	693.5	694
	0.261	692.5	690	693
	0.262	694	695.5	695.5
	0.263	693	692.5	694
	0.264	693.5	691	694
	0.265	693.5	694	694
	0.266	694.5	694.5	697.5
	0.267	693	694	697.5
	0.268	696	693.5	697
	0.269	692	693.5	697.5
	0.27	694.5	691	695.5
	0.271	694	691.5	697
	0.272	693.5	691	696
	0.273	695.5	692	697.5
	0.274	692.5	694	698.5
	0.275	692	690.5	696
	0.276	696.5	696	692.5
	0.277	694	690.5	697.5
	0.278	694.5	692	697
	0.279	692.5	690.5	698.5
	0.28	694.5	696	700
	0.281	697.5	693.5	697.5
	0.282	693.5	690.5	697.5
	0.283	695.5	693	699
	0.284	692.5	691	698.5
	0.285	695.5	694	699
	0.286	697	695.5	698.5
	0.287	693.5	697	701
	0.288	692.5	695.5	698.5
	0.289	693	695	697
	0.29	694.5	696	700
	0.291	695	693.5	700
	0.292	697.5	691.5	696
	0.293	695.5	695	701
	0.294	694	691.5	702
	0.295	695.5	695	696.5
	0.296	696	692.5	698.5
	0.297	694	695	700
	0.298	694	697.5	699
	0.299	696	694	698
	0.3	694	692.5	698
	0.301	695.5	696	697.5
	0.302	695.5	695	701
	0.303	697.5	693	697
	0.304	697	695	697.5
	0.305	694.5	694	701.5
	0.306	698	695	698.5
	0.307	697.5	696	700.5
	0.308	695.5	696.5	697.5
	0.309	696	694.5	695
	0.31	695	693.5	696.5
	0.311	694.5	695.5	698.5
	0.312	696	697.5	697.5
	0.313	697.5	694.5	694
	0.314	697.5	697	695.5
	0.315	696	694.5	695.5
	0.316	697	696	696
	0.317	697	695	697
	0.318	696.5	698	694.5
	0.319	696.5	694.5	695
	0.32	693	693	698.5
	0.321	696.5	694	696
	0.322	693.5	694.5	697
	0.323	696	695	696.5
	0.324	697.5	695.5	695.5
	0.325	695.5	695	696
	0.326	694.5	695.5	695
	0.327	694.5	694	697.5
	0.328	692	698	695
	0.329	695	697	695.5
	0.33	694.5	694	695.5
	0.331	695.5	695.5	700.5
	0.332	695.5	696	694
	0.333	695.5	694.5	693.5
	0.334	694	696	694
	0.335	694.5	697	693
	0.336	694.5	695.5	695
	0.337	692.5	693.5	690.5
	0.338	694.5	694	692.5
	0.339	696	696.5	695
	0.34	691	694.5	691.5
	0.341	692.5	694	693.5
	0.342	692.5	696	694.5
	0.343	695.5	690	693
	0.344	692	692.5	695
	0.345	694	694.5	691.5
	0.346	692.5	694.5	693
	0.347	693	695	692.5
	0.348	694.5	692	694.5
	0.349	694	693	690.5
	0.35	692	695	693
	0.351	694.5	693	691.5
	0.352	693.5	692	691.5
	0.353	691	695.5	692.5
	0.354	693.5	693.5	689.5
	0.355	696	693.5	695
	0.356	689.5	692.5	690.5
	0.357	696	694	691.5
	0.358	694.5	693	691
	0.359	692.5	693.5	695
	0.36	693	690.5	690
	0.361	693	689.5	690.5
	0.362	691.5	691	693.5
	0.363	696	694.5	693.5
	0.364	689	695.5	691.5
	0.365	691.5	688.5	691.5
	0.366	692	692.5	691
	0.367	692	695	696
	0.368	693	693	690.5
	0.369	693.5	690.5	690.5
	0.37	689.5	693	692
	0.371	693.5	690.5	691
	0.372	693	692.5	690.5
	0.373	689.5	690.5	691
	0.374	696.5	693.5	693
	0.375	691	692	692
	0.376	692.5	691.5	691.5
	0.377	695	690	694
	0.378	696.5	691	692
	0.379	691	693.5	693.5
	0.38	694	690.5	696
	0.381	690.5	692	690.5
	0.382	695.5	693	692
	0.383	695.5	689.5	697
	0.384	691.5	690.5	690
	0.385	693	694	695
	0.386	690.5	691	691
	0.387	692	694	696
	0.388	689	691.5	693
	0.389	695.5	692.5	693
	0.39	693.5	690	695
	0.391	693.5	690	690.5
	0.392	693.5	693	691
	0.393	696.5	688.5	695
	0.394	695.5	692	691.5
	0.395	692	693	693
	0.396	695	690.5	693
	0.397	693.5	691.5	694
	0.398	694	693	691.5
	0.399	696	688	692
	0.4	693	691	692.5
	0.401	693	691	692.5
	0.402	692	693	693.5
	0.403	696.5	691	694
	0.404	695	692.5	692.5
	0.405	695	695	696
	0.406	693	687	693.5
	0.407	694	695	692.5
	0.408	696.5	689	695
	0.409	689.5	692	696.5
	0.41	694	691	695
	0.411	694.5	689.5	695
	0.412	693.5	687.5	695
	0.413	693	691	696
	0.414	694.5	688.5	694
	0.415	692.5	690.5	696
	0.416	695	689.5	695.5
	0.417	697.5	687	693.5
	0.418	695.5	693.5	692.5
	0.419	694.5	690.5	696.5
	0.42	695	689.5	695.5
	0.421	691	690.5	692
	0.422	696.5	690	692.5
	0.423	692.5	691.5	691.5
	0.424	693	692	693.5
	0.425	693.5	689.5	695
	0.426	693	689.5	694
	0.427	693.5	694.5	695.5
	0.428	690.5	689	692
	0.429	695.5	690.5	693
	0.43	694.5	690.5	694.5
	0.431	697	693	693
	0.432	696.5	692.5	692.5
	0.433	695	690	689.5
	0.434	695.5	689.5	696.5
	0.435	696.5	687.5	692.5
	0.436	691.5	688.5	693
	0.437	693.5	690.5	693
	0.438	699	693	692
	0.439	696.5	690	693
	0.44	697.5	691.5	692
	0.441	696	690.5	692
	0.442	694	690.5	691
	0.443	698	689	696
	0.444	695	693	694.5
	0.445	697	689.5	690.5
	0.446	699	690.5	693
	0.447	692	692.5	692.5
	0.448	693.5	689	696.5
	0.449	693	688.5	693.5
	0.45	694.5	695	692
	0.451	697	695	693
	0.452	697	689.5	693.5
	0.453	694.5	693.5	695
	0.454	697.5	690	690.5
	0.455	694.5	691	692.5
	0.456	697	690.5	693.5
	0.457	693.5	688	690.5
	0.458	697	690.5	691.5
	0.459	694.5	691	697.5
	0.46	697.5	691	693
	0.461	695.5	690.5	696
	0.462	694	693	693.5
	0.463	695	692.5	694.5
	0.464	695.5	690.5	696
	0.465	698.5	689.5	697.5
	0.466	693.5	692	696
	0.467	696	692	695
	0.468	694	691.5	696
	0.469	695	693.5	692.5
	0.47	694	689.5	693
	0.471	696	688.5	695.5
	0.472	697.5	691.5	693.5
	0.473	695.5	693	696.5
	0.474	695	692	695
	0.475	693.5	693	697
	0.476	696	690.5	696
	0.477	696.5	691.5	697
	0.478	696.5	694.5	693.5
	0.479	697.5	692	694.5
	0.48	695	693.5	694
	0.481	696.5	696.5	693
	0.482	698.5	692.5	697
	0.483	696	694.5	692
	0.484	698	697	694.5
	0.485	698	692.5	696
	0.486	697	693.5	697.5
	0.487	697	694	697.5
	0.488	697.5	694.5	694
	0.489	696.5	695	696.5
	0.49	698	697	695
	0.491	694	691	695
	0.492	697.5	696	694
	0.493	696	697	696
	0.494	696	692	697
	0.495	699	694	697
	0.496	694.5	691.5	696
	0.497	700	694.5	695
	0.498	698.5	694.5	695
	0.499	694.5	692.5	693.5
	0.5	696	695.5	695
	0.501	697.5	698	693.5
	0.502	700	694.5	697.5
	0.503	697.5	695.5	696.5
	0.504	700	697.5	694.5
	0.505	697.5	695	695
	0.506	698.5	696.5	694.5
	0.507	697	696	694
	0.508	695	696.5	694.5
	0.509	697.5	697	695
	0.51	699.5	699	695.5
	0.511	696	696.5	696
	0.512	697	697.5	697
	0.513	695	695.5	695.5
	0.514	692.5	696	695
	0.515	695.5	697.5	693
	0.516	696.5	697	694
	0.517	697.5	701	696.5
	0.518	697	695	691.5
	0.519	698	694.5	697.5
	0.52	696	695.5	697.5
	0.521	696	694.5	692
	0.522	697	696	697.5
	0.523	696.5	692.5	693
	0.524	693.5	695.5	696.5
	0.525	693	695	693.5
	0.526	695	695.5	692.5
	0.527	693	692.5	696.5
	0.528	696	693	691.5
	0.529	696	697	693
	0.53	693.5	696.5	689.5
	0.531	694	694	692.5
	0.532	690.5	696	695
	0.533	691	695	692
	0.534	693	695.5	694.5
	0.535	689.5	694	691.5
	0.536	692	696	695
	0.537	690.5	693.5	695.5
	0.538	693	693	697
	0.539	693	690.5	697.5
	0.54	691	693.5	695
	0.541	693	697	693
	0.542	689	695.5	695.5
	0.543	691	693.5	695.5
	0.544	687	695	693
	0.545	690.5	693	694
	0.546	689.5	697.5	695
	0.547	690	692.5	693
	0.548	689.5	691.5	696
	0.549	690.5	694.5	693.5
	0.55	689.5	695	692
	0.551	688	697	694.5
	0.552	689	697	697.5
	0.553	687	690	692
	0.554	688.5	693	693
	0.555	689.5	691	693.5
	0.556	689	696.5	691
	0.557	689.5	690.5	697.5
	0.558	688.5	692	694.5
	0.559	688.5	692	694.5
	0.56	687	694	694
	0.561	686.5	695.5	694
	0.562	684.5	695	695
	0.563	686.5	692.5	695
	0.564	688	690.5	697
	0.565	686.5	693.5	690.5
	0.566	686.5	695	694.5
	0.567	687.5	692.5	693
	0.568	686.5	691.5	694
	0.569	685	691.5	692
	0.57	686.5	689.5	692
	0.571	689	694.5	694
	0.572	690	693	696
	0.573	684	694	693
	0.574	689	690.5	692.5
	0.575	689	690	692
	0.576	688	693	694.5
	0.577	687.5	688	693
	0.578	689	694	692
	0.579	689	688.5	694.5
	0.58	688.5	689	695
	0.581	687	695	698
	0.582	687	691.5	695.5
	0.583	688	689.5	693
	0.584	688.5	693	696
	0.585	686.5	691	693.5
	0.586	690.5	688.5	696
	0.587	688	692	695
	0.588	689	693	695
	0.589	690.5	692.5	695
	0.59	685.5	695	695.5
	0.591	689	689.5	694
	0.592	689.5	693.5	695.5
	0.593	690	689.5	697
	0.594	689.5	690.5	695.5
	0.595	690.5	690.5	696.5
	0.596	691.5	692	694.5
	0.597	689.5	689.5	693.5
	0.598	690	694.5	698.5
	0.599	688.5	692	696
	0.6	690.5	690.5	694.5
	0.601	690.5	691	694
	0.602	691	694	697
	0.603	691	692.5	693.5
	0.604	691	691	695.5
	0.605	694	690.5	693.5
	0.606	692.5	691	696
	0.607	693.5	693.5	694.5
	0.608	692	692.5	693.5
	0.609	692	691	697.5
	0.61	693.5	690	693.5
	0.611	696	689.5	696
	0.612	691.5	694	696
	0.613	694.5	693.5	696
	0.614	692	692.5	696.5
	0.615	694	692.5	692.5
	0.616	696.5	688.5	691.5
	0.617	693.5	691	696.5
	0.618	690	689.5	695.5
	0.619	691	691.5	695
	0.62	691.5	691	691.5
	0.621	694	696.5	694
	0.622	693.5	691	693.5
	0.623	696	691	692
	0.624	693.5	691.5	697
	0.625	697.5	693.5	693
	0.626	694	689	689
	0.627	692.5	692	694.5
	0.628	689.5	690	694
	0.629	694.5	695.5	691
	0.63	695	695	695
	0.631	694.5	689.5	692.5
	0.632	697	692	696
	0.633	693	691.5	695
	0.634	694.5	692	692.5
	0.635	694	689.5	693
	0.636	696	689.5	693
	0.637	697.5	690.5	692
	0.638	697	692.5	691.5
	0.639	696	691.5	695.5
	0.64	696	693.5	691.5
	0.641	695.5	690	691
	0.642	697	697	692.5
	0.643	696.5	691	687.5
	0.644	696	692.5	692
	0.645	695	690	693
	0.646	696	694.5	690
	0.647	696	693	690.5
	0.648	697	692	688.5
	0.649	694.5	697.5	691.5
	0.65	697.5	694	691.5
	0.651	697	694	692
	0.652	695	695.5	694
	0.653	697	693	694
	0.654	696	690.5	696
	0.655	697.5	694.5	693.5
	0.656	697	695	690.5
	0.657	697.5	692.5	690.5
	0.658	695	693.5	688.5
	0.659	696	693.5	689.5
	0.66	697.5	693.5	690.5
	0.661	698.5	689.5	689
	0.662	701.5	696	691
	0.663	698.5	694.5	695
	0.664	697.5	693	692
	0.665	697	693.5	689
	0.666	697.5	694	693
	0.667	699	691	690.5
	0.668	697	693	691
	0.669	693.5	692	693
	0.67	698	694	690
	0.671	697.5	693	691
	0.672	695	694.5	693
	0.673	695.5	691.5	691.5
	0.674	696	691.5	691.5
	0.675	695.5	692.5	692
	0.676	696	690	693
	0.677	698.5	694	690.5
	0.678	697.5	692	691.5
	0.679	698.5	693.5	692.5
	0.68	694	692	691
	0.681	694	693.5	690.5
	0.682	699.5	693	691
	0.683	697	692	696.5
	0.684	692	693	691.5
	0.685	693	694.5	695
	0.686	699	694	696.5
	0.687	695.5	695	693
	0.688	697.5	694	691.5
	0.689	695	692.5	694
	0.69	694	691	694.5
	0.691	698	692.5	692
	0.692	693.5	692	693
	0.693	696	695	692
	0.694	694	692.5	692
	0.695	695	696.5	695.5
	0.696	699	693	690.5
	0.697	695.5	693.5	693
	0.698	695	692	692.5
	0.699	695.5	693	695
	0.7	694.5	692.5	698
	0.701	694	694	693
	0.702	697.5	693	693
	0.703	691.5	692	696
	0.704	693	695	696
	0.705	696.5	696	693
	0.706	695.5	693.5	697
	0.707	694	692	693
	0.708	693	693	694
	0.709	693	694	696
	0.71	693.5	692	694
	0.711	695	691.5	693
	0.712	695	697.5	697
	0.713	692	695	693.5
	0.714	693.5	693.5	695
	0.715	697	692.5	690.5
	0.716	696	692	690
	0.717	694.5	692.5	696
	0.718	692	692.5	692
	0.719	695.5	693	695.5
	0.72	694	693.5	692
	0.721	694.5	692.5	693
	0.722	692.5	691	697
	0.723	693	695	691.5
	0.724	695.5	692	692.5
	0.725	697.5	691	692.5
	0.726	693	696.5	696.5
	0.727	696	695.5	695.5
	0.728	697.5	695	690.5
	0.729	694	696	691
	0.73	694	692	694
	0.731	695	692	690.5
	0.732	696	691	692.5
	0.733	695.5	694	690.5
	0.734	694	694.5	691
	0.735	695.5	691	692.5
	0.736	692	692	693
	0.737	695.5	694	693
	0.738	692	692	693
	0.739	693	690.5	690.5
	0.74	690.5	695	691
	0.741	694.5	691	691.5
	0.742	695.5	695	694.5
	0.743	696.5	691.5	692.5
	0.744	692	694	694.5
	0.745	691.5	695	696
	0.746	689.5	692.5	694
	0.747	696	695	699.5
	0.748	693	693.5	694.5
	0.749	692	696	695
	0.75	694	694.5	692.5
	0.751	694	695.5	691.5
	0.752	694.5	694	693
	0.753	694.5	695	695.5
	0.754	695.5	693	690.5
	0.755	696	693.5	692
	0.756	693.5	693.5	694
	0.757	693	695	695.5
	0.758	693.5	693	695
	0.759	691	692.5	692.5
	0.76	693.5	691	696
	0.761	695	692	692.5
	0.762	694	691	692.5
	0.763	693	694	695.5
	0.764	692	691.5	693
	0.765	692.5	694.5	694
	0.766	691	693.5	694.5
	0.767	692.5	692.5	693.5
	0.768	693.5	695.5	695
	0.769	693.5	691.5	693.5
	0.77	692.5	689.5	697.5
	0.771	690.5	694.5	694.5
	0.772	690.5	690.5	695
	0.773	690.5	692.5	693
	0.774	692	690.5	691.5
	0.775	693.5	693.5	695.5
	0.776	689.5	687.5	697
	0.777	691	692	694
	0.778	693.5	694.5	691.5
	0.779	691	692.5	695.5
	0.78	691.5	691.5	698.5
	0.781	696.5	692	693
	0.782	691.5	690.5	694.5
	0.783	693.5	690.5	695
	0.784	690.5	692	695.5
	0.785	694.5	692	697
	0.786	695	693.5	696
	0.787	696	692.5	695.5
	0.788	693	693	698
	0.789	691.5	690.5	697.5
	0.79	693.5	691	694.5
	0.791	693.5	693	695.5
	0.792	693	689.5	699
	0.793	693.5	692	694.5
	0.794	690	693	697
	0.795	692.5	693	698.5
	0.796	693.5	690.5	693
	0.797	694.5	688	698
	0.798	695.5	694	694
	0.799	695.5	693.5	697
	0.8	690.5	693.5	695.5
	0.801	692.5	691	696
	0.802	692	693.5	696.5
	0.803	692.5	688	697.5
	0.804	690.5	691	697.5
	0.805	695.5	693	696
	0.806	692.5	692	695.5
	0.807	697	697.5	696
	0.808	696.5	690.5	697
	0.809	694.5	694.5	694
	0.81	696	691	694.5
	0.811	694.5	690.5	697
	0.812	694	692	696
	0.813	694	692	696
	0.814	694.5	692	694
	0.815	695.5	692.5	695
	0.816	692	690.5	696.5
	0.817	693.5	690.5	693
	0.818	692.5	692.5	693.5
	0.819	695.5	690	695.5
	0.82	693	691.5	695
	0.821	690.5	692.5	696
	0.822	694.5	690.5	694
	0.823	693	693.5	698
	0.824	695	691.5	693
	0.825	693	691.5	697.5
	0.826	696.5	692.5	695.5
	0.827	692	696.5	695.5
	0.828	693	694	693.5
	0.829	688.5	690.5	695
	0.83	694.5	691	694.5
	0.831	694	692	697
	0.832	694.5	695	694.5
	0.833	691	692.5	694.5
	0.834	692.5	697	696.5
	0.835	694	696.5	698
	0.836	693.5	691	695.5
	0.837	693.5	694.5	694.5
	0.838	690.5	689	695
	0.839	693.5	696	696
	0.84	695	693.5	696.5
	0.841	694.5	696	695
	0.842	693	693.5	696
	0.843	691.5	695.5	697
	0.844	693.5	692	694.5
	0.845	697	692.5	691.5
	0.846	693	695	697
	0.847	692.5	694.5	697
	0.848	691	698.5	692.5
	0.849	696	693.5	695.5
	0.85	692.5	693	696
	0.851	690.5	694.5	693
	0.852	691.5	694.5	699
	0.853	692.5	693	692
	0.854	693	697.5	694
	0.855	695.5	696.5	696
	0.856	689.5	694.5	693
	0.857	695	696	695
	0.858	694.5	699	694
	0.859	693.5	695	692
	0.86	693.5	697.5	696.5
	0.861	695.5	693.5	695
	0.862	692.5	696	696.5
	0.863	687.5	699	697
	0.864	690.5	697.5	694.5
	0.865	691.5	697.5	693
	0.866	691	698	693.5
	0.867	688.5	700	694
	0.868	690.5	696	696
	0.869	688	698.5	696.5
	0.87	688.5	700	697
	0.871	694	697.5	696
	0.872	687	699	693.5
	0.873	687.5	695.5	695.5
	0.874	684.5	694	692.5
	0.875	686.5	697.5	692
	0.876	687.5	695	694
	0.877	689.5	697	692
	0.878	688	695	692.5
	0.879	685.5	698.5	695.5
	0.88	686	697.5	694.5
	0.881	684	697	695
	0.882	685.5	693	693.5
	0.883	684	697	693
	0.884	685.5	692.5	692.5
	0.885	683.5	693	692
	0.886	686.5	694	694
	0.887	688.5	694.5	694.5
	0.888	685	693.5	695
	0.889	684	693	692
	0.89	689	691	695
	0.891	688.5	694	693
	0.892	690.5	694.5	695
	0.893	688	694	692
	0.894	688.5	695.5	692.5
	0.895	690.5	691.5	693.5
	0.896	692	690.5	693.5
	0.897	690.5	692	690.5
	0.898	688	694.5	692.5
	0.899	689	695	695
	0.9	690.5	692.5	695
	0.901	690.5	689.5	695
	0.902	695.5	690.5	691.5
	0.903	690.5	695	691.5
	0.904	689	693	696
	0.905	698.5	693	691
	0.906	693	689	693
	0.907	696	690.5	696
	0.908	696.5	691	691.5
	0.909	696.5	691.5	693.5
	0.91	693	692.5	693.5
	0.911	695	689.5	692.5
	0.912	696.5	690	690
	0.913	701.5	691	692.5
	0.914	697	692	692
	0.915	697.5	693.5	691.5
	0.916	698	691.5	690.5
	0.917	698	691.5	692
	0.918	697	686	690.5
	0.919	699	689	691
	0.92	698	688	692.5
	0.921	701.5	690.5	691
	0.922	701.5	689.5	694
	0.923	700.5	689	694
	0.924	699	689.5	693
	0.925	702	691	692
	0.926	704	690	694
	0.927	700.5	690	697
	0.928	702.5	690	691
	0.929	703.5	688.5	690.5
	0.93	704	690	691
	0.931	706.5	691	691
	0.932	702	688.5	695
	0.933	704	693.5	691.5
	0.934	704	687.5	692.5
	0.935	699	687.5	695.5
	0.936	708	689.5	693.5
	0.937	706.5	687.5	694
	0.938	700	689.5	694.5
	0.939	702	686	695
	0.94	703.5	690.5	694.5
	0.941	704.5	690.5	695.5
	0.942	706.5	690	697.5
	0.943	704.5	689	691.5
	0.944	706	686.5	695
	0.945	706	685.5	695
	0.946	705.5	688	693
	0.947	706.5	692	695
	0.948	704.5	688.5	697.5
	0.949	704.5	688.5	692
	0.95	704.5	687.5	695.5
	0.951	704.5	691.5	699
	0.952	705.5	688	695
	0.953	701.5	688.5	692.5
	0.954	704.5	690.5	696.5
	0.955	707	692.5	695
	0.956	704.5	687.5	694
	0.957	708	689	697
	0.958	707.5	690	696
	0.959	707	690	697.5
	0.96	703	690.5	691.5
	0.961	706	688	697
	0.962	708.5	689	694
	0.963	706	690.5	697
	0.964	704.5	689.5	697
	0.965	706.5	688.5	696.5
	0.966	711	693.5	695
	0.967	709	691.5	695
	0.968	707	691.5	696
	0.969	706	691	695.5
	0.97	706.5	690.5	696
	0.971	710.5	693.5	693
	0.972	704.5	693.5	695
	0.973	707.5	690.5	695
	0.974	705	691	694.5
	0.975	706.5	691	696.5
	0.976	704.5	690.5	693
	0.977	704.5	690.5	691
	0.978	705.5	691	694.5
	0.979	704.5	690.5	693.5
	0.98	700	693	697
	0.981	700	692.5	694.5
	0.982	704.5	692	693.5
	0.983	705.5	688.5	697.5
	0.984	704	691.5	694.5
	0.985	699.5	689.5	695
	0.986	701.5	690.5	694
	0.987	701	697.5	693.5
	0.988	701	688.5	695
	0.989	700.5	695	693
	0.99	702.5	692.5	694.5
	0.991	701	692.5	692.5
	0.992	697.5	691.5	695.5
	0.993	698.5	695	694
	0.994	698.5	694	693
	0.995	697	692.5	694.5
	0.996	698.5	694	696
	0.997	699.5	692.5	696.5
	0.998	700	690.5	691.5
	0.999	698	696.5	694.5
	1	699	691	695
	1.001	700	695	691.5
	1.002	700.5	690.5	691
	1.003	702	692	693.5
	1.004	698.5	695.5	694.5
	1.005	699	691	692.5
	1.006	700	694	692
	1.007	696	695.5	690.5
	1.008	701.5	694	691.5
	1.009	700	693	692.5
	1.01	699	692	691
	1.011	701.5	693.5	695
	1.012	700.5	696.5	689.5
	1.013	700.5	693.5	694.5
	1.014	702.5	696	693.5
	1.015	704	693	691.5
	1.016	703.5	693.5	695
	1.017	701.5	693	690.5
	1.018	702	695	690.5
	1.019	703.5	695.5	690
	1.02	699.5	693	692
	1.021	704.5	693.5	690.5
	1.022	705	693.5	693
	1.023	700	694	693
	1.024	708	690.5	694
	1.025	703	696.5	690.5
	1.026	704.5	696.5	692.5
	1.027	704.5	694.5	690.5
	1.028	704	695	691
	1.029	703.5	694.5	692
	1.03	708.5	694	690.5
	1.031	706	695	692
	1.032	705.5	690.5	691
	1.033	704.5	694	692.5
	1.034	704.5	696.5	692
	1.035	707	693.5	690.5
	1.036	701.5	697	694.5
	1.037	704	695	693
	1.038	701.5	696	691.5
	1.039	704.5	693	693
	1.04	702.5	692	693
	1.041	701.5	697	697.5
	1.042	701	696	697.5
	1.043	701	694.5	692.5
	1.044	699	694	691.5
	1.045	698	693.5	693
	1.046	699.5	696	692.5
	1.047	696	697.5	691.5
	1.048	696	697	697.5
	1.049	693	694	690.5
	1.05	696	694.5	696
	1.051	696.5	696	694
	1.052	693	693.5	697.5
	1.053	693.5	697.5	696
	1.054	694.5	695.5	697.5
	1.055	687.5	693	695.5
	1.056	689	693	696.5
	1.057	684.5	693	695.5
	1.058	686.5	693	693.5
	1.059	686.5	692	693.5
	1.06	683	695	697.5
	1.061	685	692.5	695
	1.062	681	693.5	696.5
	1.063	679.5	696.5	693
	1.064	681.5	696	696
	1.065	682.5	695	697.5
	1.066	680.5	696	694.5
	1.067	678	692	693.5
	1.068	677	695	697.5
	1.069	676.5	693	697
	1.07	674	694.5	694.5
	1.071	674	691	697.5
	1.072	669	694	693.5
	1.073	670.5	692.5	699.5
	1.074	669.5	694	693
	1.075	667	694.5	696
	1.076	670	693	694.5
	1.077	663.5	691.5	695.5
	1.078	661.5	694	696.5
	1.079	661	691.5	697
	1.08	661	690	697
	1.081	656.5	691	695
	1.082	660.5	693	698
	1.083	656	694	698.5
	1.084	653	692.5	696
	1.085	652	691.5	697.5
	1.086	650	692	693
	1.087	650.5	689	698
	1.088	649.5	692	697.5
	1.089	647.5	693.5	694.5
	1.09	642.5	691	697.5
	1.091	639	695	695
	1.092	640	694.5	698
	1.093	642	690.5	695
	1.094	635	692	698
	1.095	634.5	691	695.5
	1.096	636.5	690.5	697.5
	1.097	633	692	696
	1.098	630	694	697
	1.099	630	691	692.5
	1.1	628.5	689.5	696.5
	1.101	629	692	696
	1.102	624.5	694	697.5
	1.103	623.5	691.5	694
	1.104	620.5	694.5	693
	1.105	623	696	696.5
	1.106	616	692.5	695.5
	1.107	615.5	691	694
	1.108	614	691	695.5
	1.109	610.5	691	694.5
	1.11	611.5	692	696
	1.111	609.5	691.5	696
	1.112	607.5	693.5	694.5
	1.113	606	689	692
	1.114	605	693	693.5
	1.115	603.5	690.5	694.5
	1.116	600	694.5	694
	1.117	596	693	695
	1.118	592.5	690.5	693.5
	1.119	591.5	691	696
	1.12	591.5	691	691
	1.121	588	689	694.5
	1.122	585	695.5	698
	1.123	583.5	691	696
	1.124	579	693.5	693
	1.125	576	692.5	695.5
	1.126	574.5	691.5	693
	1.127	568	695.5	691
	1.128	567	693.5	693
	1.129	565.5	694	694.5
	1.13	562.5	693	694.5
	1.131	560.5	690.5	692.5
	1.132	554	689.5	692.5
	1.133	556.5	690.5	691.5
	1.134	554.5	691.5	694.5
	1.135	547	693	695
	1.136	546	697.5	696.5
	1.137	544	691.5	694
	1.138	535	691.5	690.5
	1.139	531.5	692.5	692
	1.14	532.5	690.5	695.5
	1.141	524.5	691	695.5
	1.142	520.5	690.5	693
	1.143	517	690.5	697.5
	1.144	513.5	693	693.5
	1.145	505.5	689	693
	1.146	506.5	690.5	694
	1.147	500.5	693	693
	1.148	495	687.5	690
	1.149	490	691	693
	1.15	480.5	689	693
	1.151	477	690.5	692
	1.152	472	692	694
	1.153	470.5	693.5	695
	1.154	465	693.5	694
	1.155	458	694.5	692
	1.156	455	691	695
	1.157	446	692	695
	1.158	443.5	690	694
	1.159	438.5	690.5	694
	1.16	431.5	690.5	693.5
	1.161	428	693	692.5
	1.162	421.5	692.5	696.5
	1.163	419.5	691	692.5
	1.164	413.5	693.5	694.5
	1.165	406	693	695
	1.166	402.5	691.5	696.5
	1.167	396.5	693.5	695
	1.168	391.5	692	696
	1.169	385.5	690	693.5
	1.17	381.5	692.5	691
	1.171	373.5	691.5	693
	1.172	370.5	694	694.5
	1.173	365.5	696.5	692
	1.174	358.5	692.5	693.5
	1.175	356.5	690.5	693
	1.176	350	690.5	695
	1.177	346	690.5	693.5
	1.178	340	691	695.5
	1.179	339.5	689.5	694
	1.18	334.5	691	693
	1.181	327	694	695
	1.182	327	691.5	695.5
	1.183	321	690.5	694
	1.184	317	694	693.5
	1.185	314.5	695	692.5
	1.186	311.5	693	692.5
	1.187	308	692	691
	1.188	310	689.5	694.5
	1.189	302	693	693.5
	1.19	300	691	691.5
	1.191	297	691	691
	1.192	294	696	693
	1.193	290	694.5	693.5
	1.194	289.5	692	695
	1.195	291	694.5	694
	1.196	284.5	692	694.5
	1.197	286	694.5	692.5
	1.198	286.5	693	690.5
	1.199	283	693.5	690
	1.2	280.5	696.5	694.5
	1.201	283	691	693
	1.202	278	690.5	689
	1.203	279.5	693	690.5
	1.204	277.5	694	686
	1.205	281.5	691	694.5
	1.206	281	695	693.5
	1.207	285	694	694
	1.208	285.5	693	689
	1.209	284.5	697.5	691.5
	1.21	282	692	692.5
	1.211	284	694	690.5
	1.212	282	695	692.5
	1.213	285.5	695	689
	1.214	285.5	693	689
	1.215	286.5	697.5	687.5
	1.216	287	690.5	687.5
	1.217	289	697.5	688.5
	1.218	291.5	690.5	689
	1.219	289.5	691.5	689.5
	1.22	289.5	697	690.5
	1.221	291	692	689.5
	1.222	292	695	691.5
	1.223	292.5	697.5	689.5
	1.224	294.5	693	689.5
	1.225	291	693.5	690.5
	1.226	291	693.5	690.5
	1.227	290.5	690.5	690.5
	1.228	291	694.5	687.5
	1.229	288.5	696.5	691
	1.23	292	694	689.5
	1.231	286.5	693	690
	1.232	288	692	694
	1.233	287.5	692.5	691.5
	1.234	285	691	693.5
	1.235	284	697	688.5
	1.236	284	694	690.5
	1.237	281.5	695.5	692
	1.238	277.5	693	690.5
	1.239	273.5	697.5	688
	1.24	273.5	697.5	691
	1.241	271.5	694	696
	1.242	269.5	693	692
	1.243	266.5	692.5	692.5
	1.244	263	698	692
	1.245	258	697	690.5
	1.246	256	694	694
	1.247	252.5	696	696.5
	1.248	253.5	695	693.5
	1.249	245.5	695	693
	1.25	242	693	696
	1.251	242	693	696.5
	1.252	237	694	694
	1.253	235	698	694.5
	1.254	231	696.5	695.5
	1.255	227.5	693	692.5
	1.256	226	696	697
	1.257	221	694.5	696.5
	1.258	218	692	696
	1.259	213.5	695	695.5
	1.26	214.5	691	697
	1.261	209	694	696.5
	1.262	207	691.5	698
	1.263	205.5	695.5	694.5
	1.264	204.5	691	701
	1.265	200.5	690.5	698
	1.266	199	695.5	699
	1.267	196	691.5	698.5
	1.268	195.5	693.5	698
	1.269	195.5	690.5	690.5
	1.27	188	693	697
	1.271	190.5	690	695.5
	1.272	190.5	689.5	696.5
	1.273	184.5	692	696.5
	1.274	188.5	692	697.5
	1.275	182.5	693	697
	1.276	183	695.5	695
	1.277	183.5	693.5	694.5
	1.278	184.5	690.5	697.5
	1.279	184.5	696	696
	1.28	182	694.5	697
	1.281	181.5	693	697
	1.282	182.5	687	697.5
	1.283	182	692.5	696.5
	1.284	182.5	692	697
	1.285	180	695	701
	1.286	178	691	696
	1.287	182.5	693.5	695.5
	1.288	182.5	691.5	696
	1.289	179.5	689	696
	1.29	182	695	694.5
	1.291	182.5	694.5	697
	1.292	184	694	696
	1.293	181	690.5	697.5
	1.294	186	692	697.5
	1.295	182	692.5	698
	1.296	186	694.5	696
	1.297	186.5	692	694.5
	1.298	188.5	695.5	696
	1.299	190	692	694.5
	1.3	191	693	697.5
	1.301	192.5	692.5	692
	1.302	191	696.5	697
	1.303	193.5	696	692.5
	1.304	196.5	692.5	693
	1.305	200.5	695.5	698.5
	1.306	200	693	694.5
	1.307	203	694	696.5
	1.308	203.5	697.5	695.5
	1.309	206	696	693.5
	1.31	209	693	689.5
	1.311	212.5	696	691.5
	1.312	211.5	694	691
	1.313	214	693	690.5
	1.314	216.5	694	692.5
	1.315	218.5	692.5	690.5
	1.316	222.5	693.5	694
	1.317	227	694.5	689
	1.318	227	693	688
	1.319	227.5	689.5	690
	1.32	231	694.5	687
	1.321	238	692	688.5
	1.322	237	696.5	689.5
	1.323	241.5	692.5	685.5
	1.324	239	696	685.5
	1.325	245	694	686
	1.326	247.5	696	687.5
	1.327	251	692.5	684
	1.328	252.5	692.5	685.5
	1.329	255.5	693.5	684
	1.33	259.5	696.5	684.5
	1.331	264	693	681
	1.332	266	692.5	687.5
	1.333	271.5	695	683.5
	1.334	273	695.5	684
	1.335	279	693.5	684.5
	1.336	283	691.5	686.5
	1.337	281.5	695.5	685
	1.338	287.5	693	684.5
	1.339	293.5	692	684
	1.34	296.5	697.5	688
	1.341	303	695	683
	1.342	303.5	695	689
	1.343	307.5	691.5	684.5
	1.344	310	693	684
	1.345	316	692	687
	1.346	318.5	694	685.5
	1.347	321.5	692.5	687
	1.348	321	693	689
	1.349	326.5	695.5	683
	1.35	330.5	692.5	686.5
	1.351	328	693	687
	1.352	339	692.5	690.5
	1.353	335	698	686
	1.354	342	694	689
	1.355	344	696	692
	1.356	350	697.5	690.5
	1.357	354	692.5	689
	1.358	357.5	694	690
	1.359	357	695.5	690.5
	1.36	364	695.5	692
	1.361	370	696	692.5
	1.362	376	697.5	690.5
	1.363	376.5	695	691.5
	1.364	383	692.5	690.5
	1.365	388.5	694	696
	1.366	392.5	694	692
	1.367	399.5	693.5	695
	1.368	403.5	697	697.5
	1.369	404	695	696
	1.37	417	695	698.5
	1.371	421.5	696	697
	1.372	430.5	693	702.5
	1.373	438	698	701.5
	1.374	445.5	694	701
	1.375	454	694	701.5
	1.376	457	695.5	702.5
	1.377	469	693.5	700
	1.378	479	698	703.5
	1.379	491	694	704.5
	1.38	500.5	694.5	703.5
	1.381	513	697.5	702.5
	1.382	524.5	696	705.5
	1.383	535.5	697.5	709.5
	1.384	547	694	704.5
	1.385	559.5	697	704
	1.386	574	695	704.5
	1.387	586.5	696.5	702.5
	1.388	602	695	705
	1.389	617.5	697.5	706
	1.39	631.5	698	704.5
	1.391	644.5	694.5	710
	1.392	660.5	696	708.5
	1.393	677.5	694	708.5
	1.394	697	694.5	709
	1.395	713	694	710.5
	1.396	729.5	696.5	707
	1.397	745	692.5	710.5
	1.398	767	697	705
	1.399	785.5	695	710
	1.4	806	694.5	704.5
	1.401	825	691.5	706.5
	1.402	845.5	696.5	705.5
	1.403	868.5	694	704
	1.404	887	691.5	704.5
	1.405	908.5	694.5	704.5
	1.406	928	694.5	704
	1.407	949.5	691	707
	1.408	972.5	697	705
	1.409	993	694	704.5
	1.41	1015.5	696	704.5
	1.411	1030	695	702
	1.412	1052	689	703
	1.413	1074	693	704.5
	1.414	1090	692	704.5
	1.415	1115	691	698
	1.416	1134.5	695.5	696.5
	1.417	1151.5	691	703
	1.418	1176.5	693	697.5
	1.419	1196.5	690.5	700.5
	1.42	1218.5	689.5	699
	1.421	1241	689	698.5
	1.422	1262.5	693	702
	1.423	1288	690	697.5
	1.424	1307	692.5	696
	1.425	1325	690.5	700.5
	1.426	1354	693	700
	1.427	1373.5	693	697
	1.428	1395	691	701
	1.429	1415	692	699
	1.43	1435	689	697
	1.431	1459	688.5	699.5
	1.432	1476	691	701.5
	1.433	1498	690	696.5
	1.434	1517.5	691.5	697.5
	1.435	1537	687.5	698.5
	1.436	1557	688.5	697.5
	1.437	1576	686.5	696
	1.438	1597.5	691	697.5
	1.439	1611.5	688.5	696.5
	1.44	1633.5	687	696
	1.441	1648.5	688.5	699
	1.442	1669	693	698.5
	1.443	1682.5	685.5	696
	1.444	1699.5	686.5	697.5
	1.445	1718	685	695.5
	1.446	1738	691	693
	1.447	1755.5	687.5	696
	1.448	1771.5	687	695
	1.449	1790.5	687.5	695
	1.45	1805.5	688	695
	1.451	1819	688.5	693.5
	1.452	1837.5	687	693
	1.453	1848.5	689.5	694
	1.454	1867	690.5	691.5
	1.455	1879.5	686.5	697
	1.456	1893.5	692.5	695
	1.457	1912	687.5	694
	1.458	1924.5	689	695
	1.459	1935.5	688.5	691
	1.46	1949.5	690.5	691.5
	1.461	1956.5	687	692
	1.462	1971.5	688	693
	1.463	1981.5	689.5	690
	1.464	1997.5	689.5	689
	1.465	2008	686	689.5
	1.466	2014.5	689	686.5
	1.467	2029.5	689.5	689.5
	1.468	2036	689.5	683.5
	1.469	2044.5	688.5	685.5
	1.47	2053	687.5	687.5
	1.471	2061	690	684
	1.472	2069.5	688	684.5
	1.473	2075.5	689.5	684
	1.474	2083.5	687.5	682
	1.475	2089.5	688.5	677.5
	1.476	2090.5	685	681.5
	1.477	2097.5	690.5	679.5
	1.478	2106	689.5	676
	1.479	2111	686	674.5
	1.48	2117	690.5	675
	1.481	2119	686.5	677
	1.482	2120.5	690.5	678
	1.483	2131	688	671
	1.484	2135	689.5	670
	1.485	2135.5	690.5	672
	1.486	2144.5	688	668.5
	1.487	2146	688.5	667
	1.488	2150.5	692.5	665.5
	1.489	2150.5	689.5	667
	1.49	2157	689.5	668.5
	1.491	2160	689.5	663.5
	1.492	2163.5	692	663.5
	1.493	2161	689.5	662
	1.494	2165.5	689.5	663
	1.495	2164.5	688.5	663.5
	1.496	2163.5	689.5	659
	1.497	2165.5	689.5	657
	1.498	2165.5	689.5	660.5
	1.499	2163.5	688.5	661
	1.5	2165.5	690.5	658.5
	1.501	2164	688	658
	1.502	2165.5	687.5	657.5
	1.503	2165.5	689	653
	1.504	2165	688.5	652.5
	1.505	2165.5	691.5	650.5
	1.506	2164.5	694.5	651.5
	1.507	2165	688	648.5
	1.508	2165.5	688	646.5
	1.509	2164.5	688.5	646
	1.51	2161	689	647.5
	1.511	2165.5	689	646.5
	1.512	2165.5	690.5	644.5
	1.513	2162	688	643
	1.514	2165	690.5	637
	1.515	2165.5	690.5	636
	1.516	2164	692.5	634.5
	1.517	2162.5	689.5	632.5
	1.518	2164.5	689.5	626
	1.519	2165.5	689.5	626.5
	1.52	2165.5	690.5	622.5
	1.521	2165.5	691.5	618
	1.522	2165.5	691.5	615.5
	1.523	2165.5	691	612
	1.524	2165.5	691	611.5
	1.525	2165.5	691.5	607.5
	1.526	2165.5	693	602
	1.527	2165.5	691	602.5
	1.528	2172.5	692.5	595
	1.529	2165.5	690.5	594.5
	1.53	2172	694.5	590.5
	1.531	2165.5	693	586
	1.532	2165.5	691	580
	1.533	2163	689	578
	1.534	2160.5	689.5	572
	1.535	2161	690.5	564
	1.536	2159.5	693.5	564.5
	1.537	2158	689	558
	1.538	2155	691	554.5
	1.539	2150.5	694	547.5
	1.54	2148.5	688.5	541.5
	1.541	2147	687.5	541.5
	1.542	2135.5	689.5	533
	1.543	2135.5	688	528
	1.544	2134	689	522.5
	1.545	2131	692	519
	1.546	2125.5	690.5	512.5
	1.547	2119	686	508
	1.548	2116.5	688	499
	1.549	2110	689.5	496.5
	1.55	2103.5	688.5	492.5
	1.551	2100	690.5	481.5
	1.552	2091	686.5	476
	1.553	2087.5	690.5	474
	1.554	2083	687.5	466.5
	1.555	2082.5	692	462.5
	1.556	2075	687.5	462.5
	1.557	2069.5	690.5	453
	1.558	2066.5	688.5	444.5
	1.559	2058.5	688	444.5
	1.56	2058.5	690	438.5
	1.561	2046	693	434
	1.562	2045	690.5	430
	1.563	2042.5	693	426
	1.564	2035	692	423
	1.565	2029.5	691	418
	1.566	2027	690	412.5
	1.567	2016.5	691	407
	1.568	2016.5	696	405.5
	1.569	2012.5	694	400.5
	1.57	2014.5	697	399
	1.571	2007	695	396.5
	1.572	2001.5	697	393
	1.573	1997	696.5	392
	1.574	1994	692.5	385.5
	1.575	1991.5	694	387
	1.576	1986.5	699	386
	1.577	1986.5	698	383.5
	1.578	1983	700	379
	1.579	1978.5	700	382.5
	1.58	1976.5	701.5	377.5
	1.581	1971	699.5	378.5
	1.582	1971	698.5	376
	1.583	1966.5	701	374
	1.584	1965.5	696	371
	1.585	1965	701.5	374.5
	1.586	1956.5	701	371.5
	1.587	1956.5	700	368
	1.588	1956	704	370.5
	1.589	1953.5	701	368.5
	1.59	1951	703.5	365
	1.591	1948.5	703	361.5
	1.592	1942	702.5	363
	1.593	1942	703	363
	1.594	1934.5	702.5	361
	1.595	1932.5	704	361
	1.596	1931	704.5	359
	1.597	1923	701.5	356
	1.598	1924.5	702.5	356
	1.599	1921.5	703	353
	1.6	1916	702.5	351.5
	1.601	1912	704.5	347.5
	1.602	1912	704.5	347
	1.603	1906.5	704.5	344
	1.604	1897	701.5	341.5
	1.605	1897	704.5	339.5
	1.606	1895	701	336
	1.607	1892.5	703.5	333.5
	1.608	1886	704	329.5
	1.609	1882	703	327.5
	1.61	1881	704.5	320.5
	1.611	1879	704.5	321
	1.612	1874.5	700	315.5
	1.613	1867	702.5	314
	1.614	1867	702.5	309.5
	1.615	1865	705	306
	1.616	1860.5	706	303.5
	1.617	1857	704.5	301
	1.618	1852.5	706.5	298
	1.619	1850.5	703	289.5
	1.62	1848	703	291.5
	1.621	1843.5	703.5	284.5
	1.622	1837.5	704	280
	1.623	1837.5	702	278
	1.624	1836	704.5	274
	1.625	1833	704.5	270.5
	1.626	1833.5	704.5	266.5
	1.627	1830	702	262.5
	1.628	1822.5	703	257.5
	1.629	1819.5	705.5	257
	1.63	1821	708	250.5
	1.631	1816	704.5	245.5
	1.632	1807.5	705	246
	1.633	1807.5	705.5	241.5
	1.634	1807.5	709	239
	1.635	1802	706	233.5
	1.636	1803	708	231
	1.637	1792.5	707.5	230.5
	1.638	1792.5	709	225
	1.639	1787	707	222
	1.64	1785	708.5	219.5
	1.641	1778	709	213
	1.642	1774	704.5	212
	1.643	1768.5	707.5	206.5
	1.644	1768.5	704.5	206
	1.645	1758.5	707	206.5
	1.646	1753	707	204
	1.647	1745	711	203.5
	1.648	1741.5	710	200
	1.649	1733	709	194
	1.65	1724	707.5	196.5
	1.651	1718	707.5	194
	1.652	1710.5	707	193
	1.653	1699.5	706	197
	1.654	1692.5	706.5	191.5
	1.655	1683.5	707.5	194
	1.656	1671.5	706	191.5
	1.657	1658.5	705.5	189.5
	1.658	1654.5	707.5	191
	1.659	1640.5	702.5	190.5
	1.66	1625	708	193.5
	1.661	1614	706	190
	1.662	1596.5	706	191
	1.663	1583.5	704.5	190.5
	1.664	1569	709.5	191
	1.665	1550.5	704.5	191.5
	1.666	1531	703.5	194.5
	1.667	1516	705	194.5
	1.668	1491	704	197
	1.669	1470.5	704.5	196.5
	1.67	1443.5	701	197.5
	1.671	1420	706	198
	1.672	1394	704.5	202
	1.673	1368	705.5	204.5
	1.674	1337	704.5	204
	1.675	1304.5	704.5	207
	1.676	1270	702.5	210
	1.677	1235	704.5	213
	1.678	1197.5	702.5	219
	1.679	1161	702	219.5
	1.68	1121.5	702.5	225.5
	1.681	1077	706	230.5
	1.682	1028	698.5	232
	1.683	981	704.5	236
	1.684	930	704.5	243
	1.685	882	698.5	242.5
	1.686	827.5	704.5	247.5
	1.687	768	703	248
	1.688	712.5	704.5	254
	1.689	655	705	253
	1.69	597.5	701.5	262
	1.691	548.5	704.5	266
	1.692	494	697.5	264.5
	1.693	444.5	702.5	267
	1.694	393.5	702.5	270.5
	1.695	344.5	699	271.5
	1.696	296	703	275
	1.697	248.5	699.5	276.5
	1.698	206	701.5	278.5
	1.699	160	701	278.5
	1.7	119.5	698.5	280
	1.701	83	701.5	282.5
	1.702	58	698.5	282
	1.703	35	698	284
	1.704	13.5	696.5	281.5
	1.705	0.5	696	282.5
	1.706	-5	697.5	285.5
	1.707	-13.5	700	282
	1.708	-14	700	281
	1.709	-15.5	697	283
	1.71	-11.5	698	286.5
	1.711	-6	698.5	283
	1.712	1	697.5	284
	1.713	3.5	694	282.5
	1.714	4.5	693.5	278
	1.715	8.5	694.5	277.5
	1.716	8.5	694.5	279
	1.717	7	694.5	275.5
	1.718	9.5	696	275
	1.719	7.5	691	271.5
	1.72	2	692.5	273.5
	1.721	2.5	696	274.5
	1.722	2.5	691	272
	1.723	-1.5	694	272
	1.724	2.5	692.5	273.5
	1.725	3	688.5	272.5
	1.726	5	689.5	271.5
	1.727	1	691	275.5
	1.728	5	688	274
	1.729	3	690.5	278
	1.73	7	690.5	281
	1.731	5	688.5	286
	1.732	4	687.5	282
	1.733	3	690.5	287
	1.734	3	690.5	289
	1.735	3.5	687.5	287.5
	1.736	2	686.5	294
	1.737	3	692.5	294
	1.738	3.5	690.5	297
	1.739	2	684.5	300.5
	1.74	4	687	302.5
	1.741	3	685.5	306.5
	1.742	6.5	683.5	309
	1.743	6	684	312
	1.744	0	684	314.5
	1.745	5	686	315
	1.746	3.5	681.5	319
	1.747	3	685.5	323.5
	1.748	4	681	328
	1.749	3.5	683	327
	1.75	2.5	682	329.5
	1.751	0.5	678	335
	1.752	6.5	680.5	338.5
	1.753	4.5	677	339.5
	1.754	5	676.5	341.5
	1.755	2.5	676.5	346
	1.756	6.5	677	352.5
	1.757	6	677.5	352.5
	1.758	3	672	359
	1.759	5	671.5	363.5
	1.76	4	672.5	363
	1.761	4.5	672.5	369
	1.762	6	672	374.5
	1.763	6.5	672	378
	1.764	4	669	383
	1.765	4.5	668	386.5
	1.766	4.5	670	396.5
	1.767	2	665	398.5
	1.768	6	663.5	403.5
	1.769	4.5	662	411.5
	1.77	5	665	417.5
	1.771	4.5	658.5	420
	1.772	3	657.5	430.5
	1.773	5	658.5	437
	1.774	6	655	444
	1.775	0	653.5	451
	1.776	5.5	652	459.5
	1.777	5.5	648.5	466
	1.778	3	649.5	472
	1.779	2	646	484.5
	1.78	5.5	648	491.5
	1.781	2.5	642	500
	1.782	6.5	643.5	512.5
	1.783	0.5	638	521.5
	1.784	2.5	639.5	529
	1.785	4.5	635.5	534.5
	1.786	4.5	633	547.5
	1.787	5	632	554.5
	1.788	4.5	628	567
	1.789	0	626	575
	1.79	3	623	584.5
	1.791	3.5	625.5	595
	1.792	4.5	623	602
	1.793	3	620.5	618
	1.794	1.5	617.5	622
	1.795	8	615	639
	1.796	5.5	614	644.5
	1.797	1.5	611	651
	1.798	0	607.5	665
	1.799	4	605.5	675
	1.8	6	604.5	685.5
	1.801	1	604	697.5
	1.802	3	600	709.5
	1.803	4.5	595	716.5
	1.804	5.5	593.5	725.5
	1.805	2.5	591	739.5
	1.806	4.5	592.5	748
	1.807	4.5	589	761
	1.808	5	589	774
	1.809	2.5	584.5	789
	1.81	1.5	581	804
	1.811	3	579	814.5
	1.812	4.5	574.5	831
	1.813	6	572	842
	1.814	3.5	572.5	860.5
	1.815	1	566.5	869
	1.816	4	562.5	879.5
	1.817	2.5	562	895
	1.818	3	557	906.5
	1.819	4.5	552.5	919
	1.82	6.5	553	936
	1.821	5.5	548.5	950
	1.822	3	545	960
	1.823	6	547	976.5
	1.824	2.5	540	987.5
	1.825	3.5	535.5	1005.5
	1.826	4	536.5	1017.5
	1.827	2	532.5	1035
	1.828	2	528.5	1047
	1.829	6	524.5	1062
	1.83	3	522	1080.5
	1.831	0.5	519.5	1097
	1.832	5	514.5	1109.5
	1.833	2	512.5	1126.5
	1.834	6.5	507.5	1147.5
	1.835	6	499	1156.5
	1.836	3.5	497.5	1174
	1.837	4	492	1190.5
	1.838	5	488.5	1204
	1.839	3	483	1224
	1.84	3.5	480	1238.5
	1.841	3.5	475	1255
	1.842	5	470	1273
	1.843	4.5	459.5	1286
	1.844	1	458	1305.5
	1.845	4	452.5	1320
	1.846	7.5	448	1335
	1.847	0.5	445.5	1353
	1.848	2.5	438.5	1372.5
	1.849	2.5	433.5	1392.5
	1.85	2	428	1407
	1.851	5	419	1423.5
	1.852	3	413.5	1446
	1.853	3	406	1464.5
	1.854	6.5	398.5	1485
	1.855	5	394	1500
	1.856	5	391	1518
	1.857	3.5	383	1535.5
	1.858	1.5	377	1554
	1.859	5.5	371.5	1569
	1.86	3.5	363	1590
	1.861	4	361	1607.5
	1.862	5.5	349	1625
	1.863	4	345	1637.5
	1.864	0	342	1653
	1.865	2.5	335	1673.5
	1.866	6	331	1688
	1.867	4	326	1700
	1.868	3	318.5	1718
	1.869	4.5	313	1733
	1.87	5	313	1747
	1.871	2	303	1763
	1.872	2	298.5	1775.5
	1.873	4.5	293	1792
	1.874	0.5	289	1803
	1.875	7.5	285	1818
	1.876	2.5	280	1832.5
	1.877	5.5	275.5	1837.5
	1.878	5	273	1852.5
	1.879	4	268.5	1865.5
	1.88	1.5	265	1877
	1.881	2.5	260.5	1889.5
	1.882	3.5	259.5	1897
	1.883	3.5	250	1912
	1.884	4.5	249	1923
	1.885	5	248.5	1927
	1.886	0.5	240.5	1937.5
	1.887	4.5	244.5	1942
	1.888	6.5	238	1955
	1.889	4.5	236.5	1956.5
	1.89	3.5	236.5	1966
	1.891	1.5	229	1970
	1.892	5	227.5	1976.5
	1.893	5	226.5	1982.5
	1.894	4	227	1986.5
	1.895	4.5	218.5	1992
	1.896	6	216	1998.5
	1.897	3	215	2001.5
	1.898	3	216	2009
	1.899	6.5	214.5	2001.5
	1.9	0	211.5	2008.5
	1.901	5	209	2010.5
	1.902	0	206.5	2016.5
	1.903	1.5	208	2016
	1.904	5	205	2016.5
	1.905	7	201.5	2016.5
	1.906	4.5	200	2027
	1.907	0	199	2024
	1.908	4	199	2026.5
	1.909	3.5	198.5	2027.5
	1.91	3	195.5	2026.5
	1.911	0.5	194.5	2026
	1.912	2	194.5	2030
	1.913	4	192.5	2027.5
	1.914	5	191.5	2025.5
	1.915	2	189.5	2028.5
	1.916	4.5	188	2027.5
	1.917	-0.5	190	2027.5
	1.918	5.5	191.5	2031.5
	1.919	6.5	188	2029.5
	1.92	3.5	186.5	2029.5
	1.921	4	184	2029.5
	1.922	1	183	2016.5
	1.923	6.5	184	2027
	1.924	3.5	179	2016.5
	1.925	1.5	179	2024
	1.926	4.5	182	2016.5
	1.927	3	177.5	2016.5
	1.928	6	177.5	2016.5
	1.929	2	179	2016.5
	1.93	0.5	175.5	2016.5
	1.931	-0.5	172.5	2016.5
	1.932	2.5	175.5	2016.5
	1.933	2.5	171	2014.5
	1.934	5	176	2010.5
	1.935	5	174.5	2015.5
	1.936	2	172.5	2013
	1.937	4.5	171.5	2010.5
	1.938	2	172	2013.5
	1.939	4	171.5	2012.5
	1.94	2	173	2012
	1.941	3.5	172	2013
	1.942	3	171.5	2010
	1.943	4	171.5	2010
	1.944	1.5	170	2011.5
	1.945	2	173.5	2010
	1.946	6	173.5	2014
	1.947	5	172	2010.5
	1.948	2.5	175	2005
	1.949	0.5	174.5	2007
	1.95	5	176	2007
	1.951	3.5	176.5	2001.5
	1.952	2.5	181	2007.5
	1.953	3	181	2006
	1.954	6	182	2001.5
	1.955	2.5	184	2001.5
	1.956	4.5	187.5	2001.5
	1.957	0	186	2001.5
	1.958	3	187.5	1999.5
	1.959	3.5	185	1997
	1.96	4.5	189.5	1996.5
	1.961	6.5	190.5	1993.5
	1.962	4	192.5	1990.5
	1.963	4.5	192.5	1990
	1.964	5	194.5	1984.5
	1.965	4	193.5	1986.5
	1.966	4	195	1982
	1.967	5.5	197	1976
	1.968	4	196.5	1971.5
	1.969	2	197	1970
	1.97	0	198	1965
	1.971	5.5	205	1964
	1.972	4	204.5	1956.5
	1.973	1.5	198	1954.5
	1.974	2.5	204.5	1952.5
	1.975	4.5	201.5	1954.5
	1.976	5	200	1942
	1.977	3	202.5	1946.5
	1.978	0	203.5	1940.5
	1.979	3	203	1937.5
	1.98	0.5	201.5	1934.5
	1.981	5.5	202.5	1935.5
	1.982	-0.5	200	1930.5
	1.983	2.5	204	1927
	1.984	3	199.5	1925.5
	1.985	5.5	201.5	1924
	1.986	5	205.5	1922.5
	1.987	1	205	1924
	1.988	4	203.5	1912
	1.989	2	208	1912
	1.99	1.5	206	1909.5
	1.991	2	210.5	1905
	1.992	1.5	209.5	1904
	1.993	2	212.5	1897
[truncated: 13,006 more rows]

## Sheet: F
DataTypeVer2.0	Time	Fz	Fz	Fz
NumberOfData		7000	7000	7000
PreTriggerData		0	0	0
SamplingTime[ms]		1	1	1
DataLabel		A1:CMJ	A2:CMJ	A3:CMJ
DataUnit	sec	N	N	N
	0	617	617.5	613.5
	0.001	615	613	613
	0.002	618.5	611	615
	0.003	616	615	613
	0.004	615.5	616	614.5
	0.005	617	616.5	615
	0.006	618	612	618
	0.007	618.5	614	618
	0.008	619.5	615	614
	0.009	616	615.5	614
	0.01	616	612.5	614
	0.011	616	612.5	613.5
	0.012	618.5	615.5	615.5
	0.013	618.5	616	614.5
	0.014	617	615	613.5
	0.015	614	613.5	614
	0.016	618.5	615.5	614
	0.017	615	615	617
	0.018	616.5	613.5	615
	0.019	617.5	614	613
	0.02	619	615	613.5
	0.021	617	615.5	615
	0.022	616	616.5	615.5
	0.023	617.5	612	614.5
	0.024	617.5	613	613
	0.025	619	615	616
	0.026	615.5	611	615.5
	0.027	615.5	617	616
	0.028	619.5	615.5	614.5
	0.029	615	616.5	615
	0.03	618	616	613
	0.031	617.5	612	615
	0.032	617	616.5	613.5
	0.033	616	612	615.5
	0.034	616	613	616
	0.035	619	616.5	619
	0.036	616.5	612	614
	0.037	618.5	612.5	615.5
	0.038	619.5	613	616
	0.039	617.5	614	614
	0.04	619	613	616.5
	0.041	617	615.5	616.5
	0.042	617	615.5	613
	0.043	617	613.5	615.5
	0.044	613.5	616.5	615.5
	0.045	612	614	615
	0.046	615.5	616	616
	0.047	615	617	617.5
	0.048	615.5	612	612
	0.049	616	615.5	613
	0.05	612	614.5	616.5
	0.051	617.5	615.5	615.5
	0.052	616	615.5	616.5
	0.053	616	614.5	614.5
	0.054	614.5	616	613
	0.055	615.5	615.5	616
	0.056	613	613.5	614
	0.057	614	616	614.5
	0.058	617	616.5	613.5
	0.059	615.5	617.5	614
	0.06	619	616.5	612
	0.061	616	612	616.5
	0.062	615.5	614	617
	0.063	615.5	616.5	613
	0.064	614.5	616.5	614.5
	0.065	613.5	613	615.5
	0.066	617	613	615
	0.067	610	615	613.5
	0.068	615.5	617	615
	0.069	615.5	615.5	613
	0.07	613.5	616	616
	0.071	614	615.5	615
	0.072	615	615.5	615.5
	0.073	617	615.5	616
	0.074	615.5	618	614.5
	0.075	613	614.5	615.5
	0.076	614	614	615
	0.077	615	615	615
	0.078	616	617	615.5
	0.079	615.5	618.5	612.5
	0.08	613	618.5	616.5
	0.081	613.5	614.5	614
	0.082	612.5	615.5	615
	0.083	614	615	616.5
	0.084	614.5	613.5	615
	0.085	615.5	615.5	615
	0.086	615.5	618.5	613.5
	0.087	616.5	615.5	617.5
	0.088	617.5	613	616.5
	0.089	615.5	617.5	615.5
	0.09	615.5	616.5	615
	0.091	613	615.5	616
	0.092	616	615.5	615
	0.093	614	615.5	615.5
	0.094	615	616	615
	0.095	615	616.5	614.5
	0.096	614.5	615	617
	0.097	616	613	615.5
	0.098	616.5	615.5	620
	0.099	615	613.5	612
	0.1	616.5	616	614
	0.101	614	615.5	611.5
	0.102	616	614	616
	0.103	615.5	614.5	615.5
	0.104	614.5	615	614
	0.105	615.5	611.5	616.5
	0.106	611.5	615.5	615
	0.107	613	615	616.5
	0.108	612.5	616	615.5
	0.109	614.5	612	617
	0.11	616	615.5	616
	0.111	613	614	615
	0.112	615.5	615	614.5
	0.113	616	615.5	617
	0.114	615	615.5	617
	0.115	614	614	613.5
	0.116	616	615	615.5
	0.117	616.5	612.5	617.5
	0.118	611.5	615.5	614.5
	0.119	616.5	612	617.5
	0.12	615	615.5	617.5
	0.121	612	618	613.5
	0.122	618	614	615
	0.123	613	615	615.5
	0.124	613.5	613.5	615
	0.125	611.5	613.5	615.5
	0.126	616.5	616.5	613
	0.127	616	617	615.5
	0.128	614.5	614	617.5
	0.129	614	615	618
	0.13	612	611.5	616
	0.131	614	610.5	615.5
	0.132	612.5	615.5	617
	0.133	614	615.5	615.5
	0.134	614.5	615	614
	0.135	613.5	617.5	620
	0.136	615	614	619
	0.137	613.5	612.5	613.5
	0.138	614	616.5	619.5
	0.139	613.5	616.5	617.5
	0.14	616.5	614.5	617
	0.141	614	614	617.5
	0.142	612	613.5	616
	0.143	615	611	615
	0.144	613	612	613.5
	0.145	616	613	616
	0.146	612	615.5	615
	0.147	614.5	615.5	614.5
	0.148	615.5	614.5	617
	0.149	614.5	613	613.5
	0.15	615	613	618
	0.151	615	615.5	618.5
	0.152	615.5	614.5	616
	0.153	616	612.5	613.5
	0.154	616.5	612	617
	0.155	613.5	614	614
	0.156	611.5	613	615
	0.157	617.5	608.5	616.5
	0.158	613	613.5	617.5
	0.159	618.5	614	616.5
	0.16	615.5	611	614
	0.161	612	612.5	616.5
	0.162	617.5	612	620
	0.163	616.5	615.5	615
	0.164	616.5	613	615
	0.165	616	613.5	613.5
	0.166	616.5	613.5	613
	0.167	616	612	616.5
	0.168	616.5	613.5	616.5
	0.169	615.5	612	618.5
	0.17	612.5	612.5	616.5
	0.171	616.5	613	615
	0.172	617	613.5	615.5
	0.173	614.5	608.5	613
	0.174	615.5	612	614.5
	0.175	615.5	614.5	617.5
	0.176	614.5	612.5	619
	0.177	616.5	617	616
	0.178	618.5	612.5	618.5
	0.179	615.5	612	615.5
	0.18	615.5	615	617
	0.181	615.5	617	616
	0.182	620.5	614	614
	0.183	614.5	613.5	616
	0.184	615.5	612	617.5
	0.185	614	615.5	615.5
	0.186	618	612	616.5
	0.187	615.5	614.5	616
	0.188	617	613	617
	0.189	615	615	617.5
	0.19	618.5	615	617.5
	0.191	615	615.5	617
	0.192	614.5	615.5	616
	0.193	616	615.5	616
	0.194	616.5	615.5	614
	0.195	616	617	618
	0.196	616.5	616	618
	0.197	614	615	618
	0.198	616	615	618
	0.199	614.5	615	615.5
	0.2	614	616.5	618.5
	0.201	615.5	619.5	618
	0.202	614.5	619.5	615.5
	0.203	617.5	615.5	616
	0.204	615	618.5	621
	0.205	615	618.5	615.5
	0.206	613.5	617	619
	0.207	616	616	616.5
	0.208	616	617	617.5
	0.209	615.5	618	613.5
	0.21	614.5	615	615.5
	0.211	616.5	615.5	617
	0.212	613.5	618	615.5
	0.213	615	614.5	617
	0.214	615.5	616	616
	0.215	616.5	617.5	615.5
	0.216	612	617	614
	0.217	613.5	622	618.5
	0.218	613	621	619.5
	0.219	612	618.5	615
	0.22	614	617	616
	0.221	613.5	617.5	616.5
	0.222	613.5	618	616
	0.223	614	615	618
	0.224	611	617	619.5
	0.225	615.5	618	615.5
	0.226	613.5	616.5	615.5
	0.227	615	616	617.5
	0.228	614	618	614.5
	0.229	611.5	616.5	617
	0.23	612.5	616	614
	0.231	615.5	618.5	619
	0.232	612	616.5	617
	0.233	615	616.5	619
	0.234	613.5	615.5	615.5
	0.235	610	613	619
	0.236	610.5	618	618.5
	0.237	612.5	615	618.5
	0.238	615	615.5	617.5
	0.239	610	615	614.5
	0.24	611.5	615	620
	0.241	614	611	618
	0.242	613.5	612.5	619.5
	0.243	611.5	616	615.5
	0.244	610	613.5	616.5
	0.245	614	616.5	615.5
	0.246	613	610	616
	0.247	614.5	613	616.5
	0.248	614.5	614	616
	0.249	612	615.5	616
	0.25	615	612.5	613
	0.251	613	615	621.5
	0.252	612	614	620.5
	0.253	615	615	617.5
	0.254	613	615	614
	0.255	617.5	615	619
	0.256	614	615	617
	0.257	611	612.5	616.5
	0.258	611.5	613.5	616
	0.259	612.5	611	616.5
	0.26	614	612	616
	0.261	614.5	614	617.5
	0.262	612	611.5	617.5
	0.263	616	613.5	618
	0.264	614.5	609.5	617.5
	0.265	612	610	615.5
	0.266	611.5	615.5	615.5
	0.267	614	616	615.5
	0.268	616	616	614
	0.269	612	613.5	620
	0.27	616	613.5	614
	0.271	615	609	615.5
	0.272	615	610.5	615.5
	0.273	613.5	611	615.5
	0.274	616	615.5	612.5
	0.275	615.5	610	613
	0.276	618	608.5	612.5
	0.277	613.5	615	611
	0.278	611.5	614.5	614
	0.279	615.5	615.5	613
	0.28	612	614	615.5
	0.281	613.5	612.5	614
	0.282	616.5	615.5	611
	0.283	614	613.5	617
	0.284	612	615	613.5
	0.285	615.5	614.5	612
	0.286	612.5	610.5	614
	0.287	614.5	618.5	615
	0.288	615	618	612
	0.289	615.5	615	613
	0.29	619	615.5	612.5
	0.291	620.5	615	612
	0.292	615.5	615.5	613.5
	0.293	614.5	615.5	614
	0.294	616	614	612
	0.295	617.5	615	613.5
	0.296	616	619.5	608
	0.297	616.5	615.5	611
	0.298	615.5	616.5	608.5
	0.299	618	614	612
	0.3	615	615.5	610
	0.301	615.5	616	614.5
	0.302	620	615.5	613.5
	0.303	617.5	616	610.5
	0.304	621	615.5	613.5
	0.305	615.5	616	613.5
	0.306	616.5	616.5	613
	0.307	617	615	613.5
	0.308	619.5	615	611.5
	0.309	618	615	610.5
	0.31	618.5	614.5	612.5
	0.311	616.5	617	610.5
	0.312	616	616	611
	0.313	619.5	613.5	608.5
	0.314	617	616	613.5
	0.315	616	616.5	613.5
	0.316	614.5	615.5	612
	0.317	619.5	614	613.5
	0.318	617.5	619	611
	0.319	615	615	611.5
	0.32	619	613.5	613.5
	0.321	619	613	608
	0.322	613.5	616.5	610.5
	0.323	615.5	616.5	610.5
	0.324	616	613.5	615.5
	0.325	613.5	614.5	610.5
	0.326	616	617.5	610
	0.327	614.5	614.5	612
	0.328	615.5	614	614
	0.329	615	614.5	616
	0.33	616.5	613.5	614
	0.331	615.5	613.5	611.5
	0.332	612	611.5	612.5
	0.333	617.5	613	613.5
	0.334	615.5	616.5	614
	0.335	616.5	614.5	615.5
	0.336	619	612	615
	0.337	615	610.5	612
	0.338	615.5	613.5	612.5
	0.339	613.5	613	617
	0.34	617	613.5	616
	0.341	616.5	610	614.5
	0.342	616	611	615.5
	0.343	615.5	610	615
	0.344	614.5	608.5	617.5
	0.345	613	615.5	614
	0.346	616.5	611	614
	0.347	615.5	615	617.5
	0.348	614	613.5	613.5
	0.349	616	610.5	617
	0.35	617.5	614	614
	0.351	616	609	614.5
	0.352	615	612.5	615.5
	0.353	616	610.5	615.5
	0.354	615	608.5	611.5
	0.355	618.5	611.5	612
	0.356	617.5	611	615.5
	0.357	615.5	613	611.5
	0.358	615.5	611.5	613.5
	0.359	612	610	614.5
	0.36	615.5	611.5	613.5
	0.361	619	615.5	615
	0.362	618.5	613.5	611.5
	0.363	614	613.5	617.5
	0.364	616	615	613.5
	0.365	616	614	614
	0.366	619.5	613	615.5
	0.367	615.5	614	615.5
	0.368	615.5	612	614
	0.369	616	613	616
	0.37	615	614.5	615.5
	0.371	616	615	612.5
	0.372	615	614	617.5
	0.373	617	615.5	613.5
	0.374	613.5	615	615
	0.375	617.5	614.5	613.5
	0.376	619.5	617	615.5
	0.377	614	613.5	620
	0.378	614.5	615.5	617
	0.379	615.5	612.5	615
	0.38	614	615	615.5
	0.381	616	614	616
	0.382	615	616	615.5
	0.383	615.5	615	616
	0.384	616	616	615
	0.385	616	613.5	617.5
	0.386	618	617.5	615
	0.387	613	615.5	617.5
	0.388	615	618.5	617.5
	0.389	618.5	614.5	616.5
	0.39	612	613.5	619
	0.391	618.5	615.5	616
	0.392	615	615.5	615.5
	0.393	615.5	612	617.5
	0.394	612	615.5	613
	0.395	614	616.5	615.5
	0.396	613.5	614	615.5
	0.397	615.5	615.5	617.5
	0.398	614	614	619
	0.399	614.5	614	614
	0.4	614	614	617.5
	0.401	615	612.5	615.5
	0.402	611	613.5	617.5
	0.403	614	614	615.5
	0.404	610	615.5	616.5
	0.405	613.5	619	620
	0.406	615	614	616
	0.407	614.5	614.5	616
	0.408	611.5	615.5	617
	0.409	612	617.5	616
	0.41	614.5	612.5	615
	0.411	614	615.5	615
	0.412	610	618	614
	0.413	613	613	615.5
	0.414	610	615.5	616
	0.415	613	610.5	615
	0.416	608	616.5	617.5
	0.417	613	615	614
	0.418	611	612	615
	0.419	613	613	618
	0.42	614	616.5	615.5
	0.421	615	615.5	614.5
	0.422	610.5	615	614.5
	0.423	610.5	614	617.5
	0.424	609.5	612.5	615.5
	0.425	611.5	618.5	616
	0.426	611	615	616.5
	0.427	609	614.5	617.5
	0.428	613	614	619
	0.429	614.5	616.5	617.5
	0.43	613.5	615.5	620.5
	0.431	612	615.5	617.5
	0.432	612	611.5	617.5
	0.433	611.5	615.5	617
	0.434	610.5	614.5	616.5
	0.435	613.5	612.5	617.5
	0.436	614	612	618
	0.437	611.5	615	619
	0.438	611.5	613	621
	0.439	611.5	615.5	619
	0.44	613.5	614	617.5
	0.441	609.5	614.5	615
	0.442	613	616.5	617
	0.443	612	615	616
	0.444	614	618.5	621
	0.445	614.5	615.5	616
	0.446	613.5	613.5	619
	0.447	611.5	616.5	620.5
	0.448	615.5	615	619
	0.449	612.5	612	618
	0.45	611	615.5	618.5
	0.451	611	615.5	617.5
	0.452	610.5	618	617.5
	0.453	616	618	615.5
	0.454	614	616	617.5
	0.455	615	614	622.5
	0.456	613.5	616.5	616.5
	0.457	611	615	616
	0.458	609.5	616.5	620
	0.459	616	617	617
	0.46	615.5	615.5	616
	0.461	617.5	616.5	620
	0.462	613	618	620.5
	0.463	608.5	618.5	615.5
	0.464	609.5	619.5	616.5
	0.465	611	618	616
	0.466	611	617.5	615.5
	0.467	614.5	615	615.5
	0.468	613	615.5	617.5
	0.469	614	619	614
	0.47	615	617	614
	0.471	613.5	616.5	610.5
	0.472	613.5	619	617
	0.473	614	618	616
	0.474	611	617.5	612
	0.475	613.5	617.5	614.5
	0.476	614	616.5	615.5
	0.477	607.5	618	617.5
	0.478	616	616	619
	0.479	615	616.5	614.5
	0.48	614	616	616
	0.481	612	613.5	614
	0.482	615	618	615.5
	0.483	612	617.5	617
	0.484	615.5	613	611
	0.485	614	617	613
	0.486	615.5	615	612.5
	0.487	615.5	617	613.5
	0.488	615	617	616
	0.489	615.5	617	618.5
	0.49	617.5	615.5	612.5
	0.491	615.5	615	613
	0.492	615.5	617	616
	0.493	614	614.5	615.5
	0.494	615.5	616	611.5
	0.495	615	614.5	615.5
	0.496	614.5	614	612
	0.497	615.5	616.5	614
	0.498	617	616	615
	0.499	615.5	619	617.5
	0.5	616	614	615.5
	0.501	615.5	615	615.5
	0.502	617.5	616	616.5
	0.503	612.5	613.5	612
	0.504	615	617	615.5
	0.505	615	614	612.5
	0.506	616.5	614.5	611.5
	0.507	617	612	612.5
	0.508	616	618.5	617.5
	0.509	615	615.5	615
	0.51	615	616	613
	0.511	615	616.5	613.5
	0.512	618	615.5	614.5
	0.513	620	616.5	618
	0.514	617	617	616
	0.515	616	613.5	613.5
	0.516	617	614.5	613.5
	0.517	618	616	613.5
	0.518	614.5	612	615
	0.519	617.5	615	613
	0.52	617.5	616.5	614.5
	0.521	617	614	614
	0.522	615.5	613.5	618.5
	0.523	619.5	614	613.5
	0.524	615.5	614.5	615
	0.525	617	615	613
	0.526	617.5	615	617
	0.527	615	615	612
	0.528	618	612	615.5
	0.529	620.5	612	612
	0.53	616.5	614.5	613.5
	0.531	617.5	613.5	612
	0.532	616	613.5	617
	0.533	619	613	615
	0.534	619.5	613.5	615.5
	0.535	615	615.5	614
	0.536	617.5	611	615
	0.537	617.5	616.5	618.5
	0.538	618	615	617
	0.539	617.5	614.5	613
	0.54	619.5	614	615.5
	0.541	617.5	616	614.5
	0.542	614.5	612	615.5
	0.543	614.5	614.5	613
	0.544	616	612	614.5
	0.545	615.5	614.5	618.5
	0.546	616	615.5	617.5
	0.547	618	614.5	614
	0.548	616	616	616.5
	0.549	617.5	614.5	615.5
	0.55	615.5	610	615
	0.551	615	613.5	616.5
	0.552	614	612	615.5
	0.553	614	614.5	615.5
	0.554	618.5	613.5	619
	0.555	615.5	614.5	615.5
	0.556	617	614	617.5
	0.557	614	615.5	615.5
	0.558	616.5	615	617.5
	0.559	619	611	618
	0.56	617.5	613.5	616
	0.561	615.5	611	617.5
	0.562	617.5	614.5	620
	0.563	617.5	615	614
	0.564	615.5	614	614.5
	0.565	616.5	613.5	614.5
	0.566	617	613.5	617
	0.567	617.5	613.5	615
	0.568	612	618	617.5
	0.569	618	617	615.5
	0.57	616	611	615.5
	0.571	615	614	617.5
	0.572	616	614.5	616.5
	0.573	615.5	615.5	614.5
	0.574	614	616	618
	0.575	618.5	611.5	617
	0.576	611.5	612	614
	0.577	612.5	614	618
	0.578	615	615	619
	0.579	613.5	613	616
	0.58	615.5	616	616.5
	0.581	613	613.5	614.5
	0.582	615.5	614.5	615.5
	0.583	614	613	615.5
	0.584	615.5	615.5	615.5
	0.585	612	617	614
	0.586	613.5	616.5	616.5
	0.587	614	618.5	617
	0.588	616.5	612.5	617
	0.589	615.5	616	615.5
	0.59	614	616	616
	0.591	614.5	615.5	614.5
	0.592	614.5	617.5	617.5
	0.593	613	615	615.5
	0.594	614	612	614
	0.595	612	616.5	613
	0.596	615	616.5	614
	0.597	617.5	614.5	613.5
	0.598	617.5	612.5	613
	0.599	615	614	612.5
	0.6	613.5	613.5	617
	0.601	610	615.5	615.5
	0.602	615	614	613
	0.603	611.5	614.5	615.5
	0.604	616	614.5	613
	0.605	615.5	616	615.5
	0.606	616.5	615.5	616.5
	0.607	615	615	612.5
	0.608	618	617.5	614
	0.609	614.5	612.5	612
	0.61	615	614.5	617.5
	0.611	615	616	617
	0.612	617	613	615
	0.613	614.5	616	613.5
	0.614	615.5	612.5	615
	0.615	617	613.5	616
	0.616	614	616.5	616
	0.617	618	615.5	613.5
	0.618	613.5	615	616
	0.619	618	613	615
	0.62	612	616	613.5
	0.621	615.5	618	612.5
	0.622	616.5	614.5	615.5
	0.623	621	614.5	614.5
	0.624	616	616.5	618
	0.625	612	617.5	616
	0.626	619	616	611.5
	0.627	615	612	613
	0.628	615.5	616	612.5
	0.629	615	613	616
	0.63	615.5	615.5	616
	0.631	615.5	614	613
	0.632	611.5	615	614
	0.633	615.5	616	615.5
	0.634	615.5	614.5	615.5
	0.635	615	614	612.5
	0.636	616	616.5	617.5
	0.637	613	614	615.5
	0.638	614.5	613	613
	0.639	616	616	614.5
	0.64	613.5	613	617.5
	0.641	615	616	619.5
	0.642	620	616.5	615.5
	0.643	614.5	616	615
	0.644	612	616	616
	0.645	614.5	615.5	615.5
	0.646	613.5	618	616
	0.647	611	618.5	614
	0.648	615	615.5	617.5
	0.649	613	615.5	614.5
	0.65	614	615	617.5
	0.651	617	613.5	614
	0.652	613	615.5	616
	0.653	612	612.5	615.5
	0.654	614	616	615.5
	0.655	610.5	618.5	616.5
	0.656	611	617.5	616
	0.657	611.5	615	617.5
	0.658	608.5	617	620
	0.659	614	613	616
	0.66	615	615	615.5
	0.661	612	617	616
	0.662	614	615.5	616
	0.663	612	618.5	618
	0.664	613	617.5	616
	0.665	614.5	616	617.5
	0.666	612	617	617.5
	0.667	611.5	615.5	618
	0.668	611.5	617	619
	0.669	615.5	615.5	615
	0.67	612	617.5	617
	0.671	611.5	612	615.5
	0.672	613.5	618.5	616.5
	0.673	614.5	611	616
	0.674	613	615	619
	0.675	611.5	617.5	617.5
	0.676	615.5	617.5	614
	0.677	614.5	615.5	615.5
	0.678	617	613	615.5
	0.679	610	615	615.5
	0.68	616	615.5	615.5
	0.681	609.5	616	619.5
	0.682	613.5	616.5	615.5
	0.683	613	615.5	618.5
	0.684	615	616.5	611.5
	0.685	615	616	618.5
	0.686	615	613.5	619.5
	0.687	615.5	618	615.5
	0.688	615.5	617.5	616
	0.689	614.5	617	618.5
	0.69	616.5	614	615.5
	0.691	619	615	616
	0.692	619	619	616.5
	0.693	616	616	615.5
	0.694	614.5	618	616
	0.695	616	615.5	618.5
	0.696	616	613	617.5
	0.697	616.5	611	616.5
	0.698	615	613	614
	0.699	617	615	616.5
	0.7	617.5	620.5	615
	0.701	619.5	614	614.5
	0.702	617.5	614.5	615.5
	0.703	615	614	620
	0.704	617.5	613.5	616
	0.705	619	615	615.5
	0.706	618.5	616.5	617
	0.707	621	612.5	615
	0.708	614	615.5	617.5
	0.709	616.5	612.5	619
	0.71	619	611.5	616
	0.711	616	613	615
	0.712	615.5	616.5	615.5
	0.713	616	613.5	615
	0.714	612.5	612	613.5
	0.715	617.5	614	621
	0.716	614	610.5	615
	0.717	614	615	615.5
	0.718	614.5	615.5	616.5
	0.719	620	615	617
	0.72	615.5	615.5	615.5
	0.721	614.5	613	618.5
	0.722	615.5	614.5	615.5
	0.723	617	615	616.5
	0.724	615.5	614.5	616
	0.725	617	612	621
	0.726	613.5	614	619
	0.727	617.5	612	619
	0.728	614.5	616.5	617
	0.729	618	615.5	621
	0.73	617.5	618.5	620
	0.731	615.5	615	615
	0.732	613	615.5	615.5
	0.733	615.5	618.5	618
	0.734	615.5	615	620
	0.735	614	614	621.5
	0.736	614.5	617	619.5
	0.737	615	618.5	619.5
	0.738	615.5	616	618
	0.739	616.5	614.5	615.5
	0.74	612.5	615.5	618
	0.741	613.5	616	615.5
	0.742	611.5	615.5	618.5
	0.743	613.5	615.5	618.5
	0.744	611	615.5	617.5
	0.745	615	617	618
	0.746	615.5	615.5	618
	0.747	612.5	618	620
	0.748	613.5	616	617.5
	0.749	612	618	616
	0.75	614.5	616.5	617
	0.751	612.5	616	617
	0.752	615.5	619.5	615.5
	0.753	613	613.5	619
	0.754	615	617.5	616
	0.755	614.5	620	615.5
	0.756	613	616.5	616
	0.757	613	613.5	616.5
	0.758	612.5	618.5	616
	0.759	614.5	616	615.5
	0.76	616	615.5	618.5
	0.761	609	617	615.5
	0.762	611.5	616	613
	0.763	614.5	618	614.5
	0.764	612	616.5	615.5
	0.765	613.5	617.5	612.5
	0.766	614.5	615.5	613
	0.767	610.5	616.5	618
	0.768	613.5	616	613.5
	0.769	612	617	615
	0.77	610.5	621	612
	0.771	615	615	613.5
	0.772	612	618	616
	0.773	614	615.5	614
	0.774	612	618	613
	0.775	614	616.5	613
	0.776	615.5	616.5	613
	0.777	616.5	615.5	613
	0.778	612	617	615.5
	0.779	614	615	612
	0.78	614.5	615.5	613
	0.781	613.5	617	610.5
	0.782	616	615.5	612.5
	0.783	617.5	615	612
	0.784	612	613.5	614.5
	0.785	614.5	615.5	612.5
	0.786	614.5	615.5	609
	0.787	614	615.5	610.5
	0.788	611.5	614.5	615.5
	0.789	612	614	612.5
	0.79	615.5	613	612
	0.791	615.5	614.5	612.5
	0.792	613.5	616	615
	0.793	618.5	615.5	613.5
	0.794	614	611	612
	0.795	617.5	613	612.5
	0.796	615.5	614	609.5
	0.797	612	614	612.5
	0.798	616.5	614.5	608.5
	0.799	615.5	615.5	613.5
	0.8	616.5	611.5	613
	0.801	614	614.5	611.5
	0.802	617	612.5	615.5
	0.803	615.5	609	613
	0.804	614.5	609.5	611.5
	0.805	620	611.5	611.5
	0.806	616	613.5	613.5
	0.807	621.5	611	613
	0.808	617	612.5	616.5
	0.809	616.5	608.5	611.5
	0.81	617.5	609	615
	0.811	617	609	615.5
	0.812	619.5	609.5	613.5
	0.813	615.5	610.5	613
	0.814	618	611.5	616
	0.815	617.5	612.5	613
	0.816	619.5	609.5	617
	0.817	619.5	610	615
	0.818	616	612	615.5
	0.819	615.5	609.5	613.5
	0.82	616.5	611	616
	0.821	613	612	615
	0.822	616	610.5	613.5
	0.823	615	611	612.5
	0.824	619	608	614
	0.825	618	609.5	615.5
	0.826	617.5	609.5	614.5
	0.827	615.5	613.5	612.5
	0.828	617	610.5	611.5
	0.829	616	611	615
	0.83	617.5	614.5	614.5
	0.831	616	613.5	614.5
	0.832	617.5	611	616
	0.833	616	611	614.5
	0.834	615	611	615.5
	0.835	616	610.5	616
	0.836	615.5	614	613
	0.837	613	613	612
	0.838	616	610.5	615.5
	0.839	619	609.5	613
	0.84	612	614	614.5
	0.841	613.5	613.5	612
	0.842	612	614	616.5
	0.843	615.5	613.5	614
	0.844	619.5	615.5	616.5
	0.845	617.5	615.5	614
	0.846	616.5	615	614
	0.847	618.5	614.5	615.5
	0.848	614	614.5	615
	0.849	617.5	613	615
	0.85	613.5	615	613.5
	0.851	616	612	615.5
	0.852	616	615.5	612
	0.853	617.5	612	617.5
	0.854	618.5	614	615
	0.855	615.5	611	616
	0.856	614.5	615.5	613
	0.857	619	615	613.5
	0.858	615	614.5	613.5
	0.859	615.5	615.5	616
	0.86	616	613	614.5
	0.861	617.5	615.5	619
	0.862	616.5	615	614.5
	0.863	615.5	615	616
	0.864	617	613.5	615
	0.865	616.5	615	616
	0.866	619	614.5	616
	0.867	617	615	615.5
	0.868	612.5	616	614
	0.869	616	612.5	615.5
	0.87	616.5	618.5	616
	0.871	615.5	613.5	612.5
	0.872	613	613	614
	0.873	615.5	616.5	617.5
	0.874	613	613.5	620
	0.875	618.5	619	617.5
	0.876	612.5	614	615.5
	0.877	614	610.5	614
	0.878	613.5	616	616
	0.879	614	615.5	617.5
	0.88	613.5	612.5	618
	0.881	616.5	615.5	616.5
	0.882	620.5	613	615.5
	0.883	614	614.5	615.5
	0.884	617	621	615
	0.885	615	620	618.5
	0.886	617	616.5	613.5
	0.887	613.5	615.5	616.5
	0.888	612.5	616	618.5
	0.889	615.5	614.5	615.5
	0.89	615.5	612	615
	0.891	616	615.5	616.5
	0.892	616	613	616.5
	0.893	619.5	613.5	619
	0.894	612	614.5	619
	0.895	612	614	616
	0.896	611.5	617	617
	0.897	614	614	617.5
	0.898	615.5	614	617.5
	0.899	615	612.5	618.5
	0.9	613	615	616
	0.901	613	613.5	620
	0.902	610.5	615	620
	0.903	615.5	617	616.5
	0.904	615	616	617.5
	0.905	614.5	615.5	619
	0.906	613.5	617	618
	0.907	614	613.5	619.5
	0.908	613.5	615	621
	0.909	617	614.5	616.5
	0.91	612.5	614.5	614.5
	0.911	614.5	615	619.5
	0.912	615.5	612	619
	0.913	611	613	620
	0.914	612.5	615	617
	0.915	615	616.5	617
	0.916	612	617	617
	0.917	610.5	616	617
	0.918	616	616	618.5
	0.919	615.5	617	617.5
	0.92	611.5	616.5	615.5
	0.921	611.5	611	618.5
	0.922	613	613	620
	0.923	614	615	617.5
	0.924	611.5	617.5	620
	0.925	613	613.5	615.5
	0.926	616	613	618.5
	0.927	613.5	616	618.5
	0.928	611.5	615.5	616.5
	0.929	612	614.5	615.5
	0.93	613.5	614	615.5
	0.931	613.5	612	615.5
	0.932	614	615	615.5
	0.933	611.5	612	619.5
	0.934	612	615	615.5
	0.935	614	613.5	614.5
	0.936	615.5	612.5	616.5
	0.937	611.5	616.5	615.5
	0.938	612	614.5	614.5
	0.939	611.5	615.5	613.5
	0.94	614	614	614
	0.941	616.5	615.5	618
	0.942	612.5	616	613.5
	0.943	610	615.5	613.5
	0.944	611	612	609.5
	0.945	612	615.5	614
	0.946	614	615	614
	0.947	615	615.5	611.5
	0.948	610.5	617	614.5
	0.949	615	616.5	611.5
	0.95	614.5	616	610
	0.951	610.5	613	617
	0.952	614	615	615.5
	0.953	612	617	610.5
	0.954	613	616.5	611.5
	0.955	615.5	615	612.5
	0.956	611.5	616.5	616
	0.957	612	615.5	616.5
	0.958	614.5	618.5	614.5
	0.959	614.5	618	615.5
	0.96	610.5	617	613.5
	0.961	612	615.5	613.5
	0.962	611	615	610.5
	0.963	608	615	610
	0.964	613.5	615.5	612
	0.965	611.5	619	612.5
	0.966	611	619.5	615.5
	0.967	612	615.5	611.5
	0.968	612.5	613.5	613
	0.969	610	618.5	613.5
	0.97	612.5	615	612.5
	0.971	611.5	615.5	610
	0.972	614	613.5	608.5
	0.973	613.5	615	610
	0.974	611	613	615
	0.975	612	614.5	611.5
	0.976	611	615.5	614
	0.977	613	617.5	613.5
	0.978	611	614.5	611.5
	0.979	615.5	615.5	611
	0.98	612	615.5	612.5
	0.981	614.5	611	611.5
	0.982	614.5	615	612.5
	0.983	613	616	612.5
	0.984	614.5	617.5	612.5
	0.985	615	615.5	611.5
	0.986	615.5	616	613
	0.987	612.5	615	612.5
	0.988	612.5	615.5	613.5
	0.989	614	616.5	611.5
	0.99	614.5	617	615
	0.991	615	612.5	615.5
	0.992	617	615	610
	0.993	612	615.5	613.5
	0.994	611.5	617.5	610
	0.995	615	613.5	615.5
	0.996	617	613.5	615
	0.997	616	612.5	615
	0.998	617	616	613.5
	0.999	614	616.5	614
	1	615	615	614
	1.001	615.5	616	615
	1.002	614	615	613.5
	1.003	615	613.5	615.5
	1.004	615.5	617	614.5
	1.005	617	614	616
	1.006	616.5	616.5	615
	1.007	618.5	615.5	615
	1.008	619.5	614	615.5
	1.009	615.5	615.5	617.5
	1.01	619	613.5	617
	1.011	618.5	617	615
	1.012	617	612.5	613
	1.013	619	614	614.5
	1.014	619.5	614	614.5
	1.015	618.5	615	617.5
	1.016	617.5	614	616
	1.017	617.5	616	613.5
	1.018	617	614.5	617.5
	1.019	615	615.5	617.5
	1.02	620	611	618
	1.021	617.5	614	616.5
	1.022	615	617	617.5
	1.023	619	615.5	617.5
	1.024	615	615	616
	1.025	613.5	615.5	617.5
	1.026	619.5	614.5	615
	1.027	617.5	610.5	615
	1.028	622	610.5	615
	1.029	614.5	613.5	617
	1.03	613.5	615.5	615.5
	1.031	615.5	615	617.5
	1.032	616.5	616	615.5
	1.033	616	613	619
	1.034	615	613.5	618
	1.035	618	615.5	616
	1.036	616.5	616.5	617
	1.037	619	614	614
	1.038	617	613.5	615
	1.039	617	615	613
	1.04	615.5	613.5	616.5
	1.041	617	614.5	617.5
	1.042	617	614	617.5
	1.043	615	615.5	618
	1.044	616.5	615.5	618
	1.045	617	615	616
	1.046	616	613.5	619
	1.047	616	611	616
	1.048	614.5	615.5	617.5
	1.049	619	617	621
	1.05	616.5	614.5	616.5
	1.051	619	615	616
	1.052	621	616.5	616.5
	1.053	616	616	618
	1.054	619	615.5	620.5
	1.055	617.5	611	617.5
	1.056	616	616.5	619.5
	1.057	613.5	610.5	615.5
	1.058	615.5	614.5	619
	1.059	617	615.5	617.5
	1.06	616	616.5	619
	1.061	613.5	618	617
	1.062	616	615.5	618
	1.063	617	614	617
	1.064	616	615.5	618.5
	1.065	614.5	618.5	618
	1.066	613.5	616.5	619.5
	1.067	614	615.5	617.5
	1.068	616	613	621.5
	1.069	615.5	615	617.5
	1.07	614.5	615	617
	1.071	616	618.5	617.5
	1.072	615	618	616
	1.073	615.5	612.5	619.5
	1.074	616.5	616.5	617
	1.075	618.5	615	615.5
	1.076	619	615	617.5
	1.077	615	617	616.5
	1.078	615	616.5	619
	1.079	615.5	616.5	619.5
	1.08	615.5	614.5	615
	1.081	616	616.5	614.5
	1.082	615.5	616.5	615
	1.083	617.5	616	617.5
	1.084	615	617	613.5
	1.085	614	613.5	619
	1.086	615	615	615
	1.087	615	618	619.5
	1.088	611	615.5	614.5
	1.089	615.5	615.5	613
	1.09	611.5	613	616.5
	1.091	616	615	613.5
	1.092	616	618.5	616
	1.093	617.5	615.5	618
	1.094	615.5	620	614
	1.095	616.5	615.5	615.5
	1.096	613.5	615	616
	1.097	616	616.5	613.5
	1.098	614.5	614.5	618
	1.099	615.5	615.5	615.5
	1.1	617	615	613.5
	1.101	615.5	615	613.5
	1.102	615	615	617.5
	1.103	612	616.5	616.5
	1.104	617	619	615.5
	1.105	616	610	615.5
	1.106	616	615.5	616
	1.107	615	615.5	616.5
	1.108	611	615.5	615.5
	1.109	616	615	615.5
	1.11	618	615.5	615.5
	1.111	613.5	616	616
	1.112	615.5	616.5	615.5
	1.113	613.5	616	613
	1.114	616	615	613
	1.115	618.5	616	615.5
	1.116	617	615	619
	1.117	614.5	613	614.5
	1.118	615	614	613.5
	1.119	618.5	617.5	616
	1.12	615	615.5	617.5
	1.121	617.5	616	614.5
	1.122	613.5	614.5	613.5
	1.123	615	616	612
	1.124	615	613.5	618.5
	1.125	614.5	615.5	615.5
	1.126	616.5	612.5	617.5
	1.127	614.5	614	615.5
	1.128	612.5	615.5	611
	1.129	612	617	611.5
	1.13	614.5	613.5	616
	1.131	613.5	613	615
	1.132	611.5	614.5	615.5
	1.133	616.5	613	618.5
	1.134	615.5	613.5	616
	1.135	616.5	614	617
	1.136	614	615.5	618.5
	1.137	619	611.5	616
	1.138	615	614	619.5
	1.139	615.5	613	616
	1.14	612	617.5	616.5
	1.141	610.5	615	619.5
	1.142	615	610	617
	1.143	611.5	609.5	617.5
	1.144	614	610.5	619.5
	1.145	615	615.5	618
	1.146	615	612	616
	1.147	613.5	612.5	614
	1.148	617	612	615
	1.149	614	615.5	616
	1.15	615	614.5	618.5
	1.151	612	614	618.5
	1.152	617	612	619
	1.153	615.5	613	615
	1.154	613.5	615.5	618
	1.155	613	613.5	617
	1.156	614.5	614.5	617
	1.157	614.5	612	616.5
	1.158	617	609	616
	1.159	614.5	611	615
	1.16	615.5	612.5	619
	1.161	618.5	615	620
	1.162	615	614.5	618
	1.163	617	612.5	615.5
	1.164	615	615.5	616.5
	1.165	616	616.5	617.5
	1.166	614.5	611	618.5
	1.167	617	615.5	618
	1.168	614	615.5	619
	1.169	615	618	616
	1.17	616	615	616.5
	1.171	614.5	616.5	620.5
	1.172	615.5	613.5	615
	1.173	615	615	618
	1.174	617	616	615.5
	1.175	615.5	615	615.5
	1.176	617.5	615	617
	1.177	617.5	611	620
	1.178	615	611.5	615.5
	1.179	615	616.5	618.5
	1.18	616	618	618
	1.181	615.5	614	616
	1.182	618	613.5	617
	1.183	616	615	617.5
	1.184	616	616.5	616
	1.185	615.5	617	615.5
	1.186	614	615.5	617.5
	1.187	614.5	617	617
	1.188	621.5	617.5	614.5
	1.189	617.5	616.5	619.5
	1.19	618	615.5	614
	1.191	618.5	616.5	617.5
	1.192	615	616.5	611
	1.193	616	615.5	617
	1.194	614.5	618	615.5
	1.195	619.5	618.5	615.5
	1.196	617.5	616.5	615.5
	1.197	617.5	618.5	613.5
	1.198	616	622.5	616.5
	1.199	617.5	617.5	614.5
	1.2	616	616.5	615.5
	1.201	616	618	616
	1.202	616	616	616
	1.203	618.5	618.5	616
	1.204	616	617.5	620
	1.205	616	617	615
	1.206	613.5	615	613.5
	1.207	614.5	617	618
	1.208	617.5	620	615.5
	1.209	615.5	617.5	615
	1.21	614.5	617	611.5
	1.211	615.5	617.5	617.5
	1.212	613.5	616	616
	1.213	617.5	621	616
	1.214	614	621.5	615.5
	1.215	614	618.5	615
	1.216	614.5	618.5	615
	1.217	617	619.5	615.5
	1.218	616	616.5	615
	1.219	613.5	615	615.5
	1.22	615.5	619.5	616
	1.221	615	617.5	616
	1.222	615	616	616.5
	1.223	613.5	616	619.5
	1.224	614.5	612	616
	1.225	615.5	618	615.5
	1.226	611	615	616.5
	1.227	612.5	615	616
	1.228	616.5	616	616
	1.229	613.5	615.5	619
	1.23	612.5	616.5	615.5
	1.231	614	618	616
	1.232	614.5	619.5	613
	1.233	613.5	616.5	619
	1.234	614	617	620.5
	1.235	617	613.5	615
	1.236	613.5	614.5	616.5
	1.237	615.5	617.5	618
	1.238	611.5	616	617
	1.239	613.5	614.5	612.5
	1.24	615.5	615.5	614.5
	1.241	618	617.5	618.5
	1.242	615.5	613.5	619.5
	1.243	612.5	616.5	615
	1.244	616	615	620.5
	1.245	613.5	611.5	613
	1.246	612.5	614	615
	1.247	614	616	618
	1.248	614	613.5	616
	1.249	614.5	615	615
	1.25	615	615	616.5
	1.251	611.5	616.5	616
	1.252	615	614	613.5
	1.253	615	615.5	615
	1.254	615	615.5	618
	1.255	613	612	616
	1.256	615.5	616	615
	1.257	615.5	615.5	613.5
	1.258	614.5	615	615.5
	1.259	615	615.5	615.5
	1.26	609.5	613	614
	1.261	611.5	614	614
	1.262	618	613.5	614.5
	1.263	614	614.5	614
	1.264	612	611.5	613.5
	1.265	610.5	613	610.5
	1.266	612	615	615
	1.267	613	612.5	616
	1.268	614.5	616	615
	1.269	613	614	615.5
	1.27	618	616.5	615
	1.271	610	615.5	611
	1.272	612	613	611.5
	1.273	613	616	615
	1.274	614	614	611.5
	1.275	612	618	612
	1.276	612.5	616.5	612
	1.277	614	612	609
	1.278	616	616	610
	1.279	613.5	615.5	610.5
	1.28	612	615.5	609.5
	1.281	615	615.5	612.5
	1.282	612	616.5	609.5
	1.283	615.5	614	611
	1.284	612.5	614.5	613.5
	1.285	609.5	614	611.5
	1.286	614.5	611	612.5
	1.287	614	611.5	609.5
	1.288	617.5	615	611
	1.289	615.5	613.5	611.5
	1.29	613.5	617	611
	1.291	611	613	609
	1.292	610.5	612	615.5
	1.293	612.5	612	613.5
	1.294	612	613.5	613.5
	1.295	616	616.5	615
	1.296	611.5	616.5	613.5
	1.297	613	615.5	615.5
	1.298	613	616.5	615
	1.299	614	615	614
	1.3	615	615.5	616
	1.301	615.5	613.5	612
	1.302	615	613	616.5
	1.303	611.5	611	616
	1.304	613	613	617.5
	1.305	615	613.5	613
	1.306	616	613	616
	1.307	615.5	613.5	619
	1.308	615	611.5	614.5
	1.309	615.5	615	612.5
	1.31	616.5	616.5	617.5
	1.311	616.5	612	615.5
	1.312	617	614	618.5
	1.313	618	612.5	616
	1.314	616	615.5	615.5
	1.315	619.5	612	617.5
	1.316	616.5	613	618
	1.317	616	615	613.5
	1.318	615.5	615	616
	1.319	620.5	611.5	615.5
	1.32	621	611.5	619
	1.321	617	613	616
	1.322	617	615	619
	1.323	620	614.5	618
	1.324	615.5	614.5	619.5
	1.325	615.5	614.5	618
	1.326	618	610.5	615.5
	1.327	621.5	612.5	615
	1.328	621.5	613	616
	1.329	619	612.5	619.5
	1.33	619.5	613.5	613.5
	1.331	620	611.5	617.5
	1.332	621.5	610.5	615.5
	1.333	619	615.5	615.5
	1.334	617	611.5	619
	1.335	621.5	612	615.5
	1.336	617.5	611	613.5
	1.337	618	612.5	618.5
	1.338	619.5	612	616.5
	1.339	617	613.5	616
	1.34	615.5	613	615
	1.341	615.5	611.5	618.5
	1.342	620	615	616.5
	1.343	621	614.5	619.5
	1.344	619.5	611.5	615.5
	1.345	616.5	611.5	616.5
	1.346	620	611.5	617
	1.347	619.5	615.5	613
	1.348	619.5	610.5	616
	1.349	619	615	615.5
	1.35	616.5	615	614.5
	1.351	621.5	615.5	620.5
	1.352	619	613.5	618.5
	1.353	619	613	617.5
	1.354	617	610.5	614
	1.355	619.5	613.5	615.5
	1.356	617.5	615	615.5
	1.357	617	614	620
	1.358	620	615	612.5
	1.359	616	615.5	618
	1.36	620	614	614
	1.361	620	612	617
	1.362	619.5	612	615.5
	1.363	619.5	613.5	616
	1.364	621.5	616	618.5
	1.365	615	611.5	613.5
	1.366	615.5	611.5	617
	1.367	619.5	614	617
	1.368	615.5	614.5	617
	1.369	617	616	617.5
	1.37	618	612.5	613.5
	1.371	617.5	615.5	618
	1.372	617.5	615	616
	1.373	616	614	616.5
	1.374	618	615.5	615.5
	1.375	617	616	617.5
	1.376	615	615	620
	1.377	614	613.5	619.5
	1.378	619	615.5	620.5
	1.379	615.5	616	615
	1.38	618.5	618.5	616.5
	1.381	619	613.5	615
	1.382	616.5	616.5	616
	1.383	616	615	615.5
	1.384	617.5	613.5	616
	1.385	618	615	615.5
	1.386	617	615	616
	1.387	617.5	614.5	615
	1.388	617	615.5	618
	1.389	617.5	615.5	615.5
	1.39	616	610.5	613.5
	1.391	620	615.5	613.5
	1.392	621	616	615.5
	1.393	620	617	618.5
	1.394	620	615	616.5
	1.395	618	612	617.5
	1.396	618	615	615
	1.397	618	616.5	613.5
	1.398	622	613.5	615.5
	1.399	621.5	614.5	617
	1.4	619	615	615.5
	1.401	618.5	617	617
	1.402	619.5	615.5	618.5
	1.403	619	616	611
	1.404	619.5	618	619
	1.405	619.5	616.5	613
	1.406	618	614.5	614
	1.407	618	615	618
	1.408	621.5	615.5	615
	1.409	619	616.5	614
	1.41	621.5	615	615.5
	1.411	617.5	617.5	619.5
	1.412	621.5	615.5	618
	1.413	618	613.5	613.5
	1.414	619.5	617	615
	1.415	618.5	615	616.5
	1.416	619.5	616.5	614
	1.417	615	614.5	615
	1.418	617.5	614	613.5
	1.419	619	610.5	615
	1.42	617	615.5	614.5
	1.421	619	614	615.5
	1.422	618.5	613	615.5
	1.423	615.5	612	615.5
	1.424	619	612.5	613.5
	1.425	617.5	612.5	615
	1.426	616.5	614	615
	1.427	616	615	614
	1.428	615	616	616.5
	1.429	615.5	612	614
	1.43	614	613	615.5
	1.431	616	618.5	611
	1.432	615.5	613.5	611.5
	1.433	615	615.5	616
	1.434	612	613.5	616.5
	1.435	618.5	613.5	613.5
	1.436	615	615	614
	1.437	615	615.5	611.5
	1.438	615.5	616.5	615
	1.439	614.5	616	615.5
	1.44	610.5	613.5	613
	1.441	612	613.5	611.5
	1.442	613.5	612.5	611
	1.443	615	614.5	614.5
	1.444	609	615	614.5
	1.445	610	614	611
	1.446	609	612.5	615.5
	1.447	612	615.5	613
	1.448	612	613.5	612.5
	1.449	610	612	614
	1.45	607.5	613	612.5
	1.451	610	609.5	611.5
	1.452	609	615	613.5
	1.453	609.5	613.5	613.5
	1.454	606.5	615.5	613.5
	1.455	609.5	615	612
	1.456	609	618	615.5
	1.457	610	615.5	612
	1.458	612	613.5	614
	1.459	609	613.5	614.5
	1.46	610.5	613.5	616.5
	1.461	610	618.5	619.5
	1.462	609.5	614.5	611.5
	1.463	605.5	614.5	618
	1.464	611	614.5	616
	1.465	608	615.5	615
	1.466	609.5	615	615.5
	1.467	612	617	613
	1.468	610.5	617	612
	1.469	610.5	614	613
	1.47	608.5	615.5	616
	1.471	611.5	618	617
	1.472	612	615.5	615.5
	1.473	613	616	613
	1.474	611	616	615
	1.475	608	614	615.5
	1.476	609.5	618.5	614.5
	1.477	609.5	615	616
	1.478	610.5	616	613
	1.479	614	616.5	616
	1.48	610.5	615.5	611.5
	1.481	609.5	617	615.5
	1.482	608.5	618.5	613
	1.483	610.5	617	615.5
	1.484	611.5	615	615.5
	1.485	612.5	618	614
	1.486	614	618	613
	1.487	611	620	618
	1.488	612	615	615.5
	1.489	610.5	616	615.5
	1.49	614.5	618.5	613.5
	1.491	612.5	616.5	614.5
	1.492	612.5	619.5	614
	1.493	614	617	615
	1.494	614	616.5	617
	1.495	611.5	619.5	615.5
	1.496	610.5	617.5	614
	1.497	613.5	616	617.5
	1.498	610	615.5	610.5
	1.499	614.5	616.5	612.5
	1.5	609.5	619	614.5
	1.501	610.5	617.5	615
	1.502	610.5	618	615.5
	1.503	611	615	613
	1.504	612	615	615.5
	1.505	612	619	615.5
	1.506	614	616.5	614
	1.507	614	616.5	613.5
	1.508	610	621	615.5
	1.509	612.5	615.5	617.5
	1.51	613.5	615.5	613
	1.511	612.5	616.5	614
	1.512	614	617.5	615
	1.513	615	614.5	615.5
	1.514	615.5	615	615.5
	1.515	615	617.5	612
	1.516	614	615.5	614.5
	1.517	614.5	617	616
	1.518	609	613	615
	1.519	614	616.5	615
	1.52	614	615	613.5
	1.521	613	614	613.5
	1.522	616	614.5	616.5
	1.523	615.5	612	615
	1.524	612.5	618.5	615
	1.525	614.5	616	615.5
	1.526	616	611.5	615.5
	1.527	612	612.5	615
	1.528	613	616	618
	1.529	616	614.5	613
	1.53	615	612.5	617
	1.531	618	611	611.5
	1.532	615	609.5	613
	1.533	614	615.5	616
	1.534	615.5	615	613.5
	1.535	616.5	616	611.5
	1.536	619.5	612	615
	1.537	618.5	612.5	615
	1.538	616	616.5	614.5
	1.539	618.5	612.5	613
	1.54	617.5	615	614
	1.541	614.5	615.5	617.5
	1.542	615	611.5	612
	1.543	615.5	611.5	613
	1.544	614.5	614	615
	1.545	617.5	614	615
	1.546	618.5	611	614.5
	1.547	619	615.5	612
	1.548	619.5	615.5	615
	1.549	616	615.5	615
	1.55	619	616	612.5
	1.551	616	612.5	615
	1.552	619	613.5	615
	1.553	621	613.5	610
	1.554	616.5	615.5	613.5
	1.555	619.5	615	614
	1.556	620.5	615.5	611.5
	1.557	616	614.5	615
	1.558	619.5	614	613.5
	1.559	622	614	614.5
	1.56	616	616.5	617.5
	1.561	621.5	615	611
	1.562	621.5	614.5	613.5
	1.563	617.5	617	618
	1.564	618	615.5	616
	1.565	619.5	614.5	615
	1.566	619.5	615	612.5
	1.567	616.5	618	615
	1.568	618	617.5	616
	1.569	619	615.5	617.5
	1.57	615.5	619	615.5
	1.571	619.5	616	612.5
	1.572	621.5	618.5	613.5
	1.573	616	616.5	615.5
	1.574	619.5	618.5	615
	1.575	618.5	616.5	615
	1.576	618.5	618.5	617.5
	1.577	618.5	616.5	616
	1.578	614	615.5	619.5
	1.579	616.5	616	620
	1.58	620.5	610	621.5
	1.581	617.5	618	616.5
	1.582	619	615.5	617.5
	1.583	616	613.5	616.5
	1.584	618.5	615.5	617.5
	1.585	621	617	619.5
	1.586	619.5	615	617.5
	1.587	617.5	617	621.5
	1.588	617.5	617	621
	1.589	618.5	616	622
	1.59	616.5	617	623
	1.591	616.5	616	621.5
	1.592	615.5	615.5	619.5
	1.593	617	616	621
	1.594	620	617	620.5
	1.595	620	615.5	617.5
	1.596	617	615	622.5
	1.597	617.5	618.5	620.5
	1.598	616.5	616.5	623.5
	1.599	616	617	622
	1.6	616.5	614.5	621.5
	1.601	616.5	615.5	623
	1.602	617.5	618	622.5
	1.603	619	616.5	626.5
	1.604	620	614.5	621.5
	1.605	619.5	622	619
	1.606	619.5	614.5	624.5
	1.607	619	614	621.5
	1.608	616.5	618.5	620
	1.609	618	612	622
	1.61	619	613.5	624
	1.611	615.5	614	622
	1.612	617.5	615	621.5
	1.613	616	613	624.5
	1.614	614.5	616.5	622.5
	1.615	615.5	614.5	622
	1.616	618.5	615	621
	1.617	618	615	621.5
	1.618	614.5	615.5	620.5
	1.619	618	615	622
	1.62	618	615	622.5
	1.621	614	614	622
	1.622	615	613	620.5
	1.623	615	615	618
	1.624	616	615	621
	1.625	616	615	619
	1.626	615.5	618.5	615.5
	1.627	616	615.5	617
	1.628	615.5	615.5	617.5
	1.629	616	613	616.5
	1.63	615.5	616	618.5
	1.631	612	615	618.5
	1.632	615.5	616	620
	1.633	617	618	616.5
	1.634	614.5	617	620.5
	1.635	614.5	615.5	618
	1.636	614	616	615
	1.637	615.5	615.5	617.5
	1.638	615.5	615.5	616.5
	1.639	615.5	612	618.5
	1.64	614.5	615.5	618.5
	1.641	613.5	618	617.5
	1.642	617	614	618.5
	1.643	615	617	618
	1.644	616	614.5	616
	1.645	615.5	618	616.5
	1.646	615.5	617	620.5
	1.647	608.5	611	617.5
	1.648	614	615	618.5
	1.649	609	615	615
	1.65	612.5	615	617
	1.651	612.5	615.5	618.5
	1.652	611.5	614	620
	1.653	611	615	619
	1.654	614.5	613.5	619
	1.655	613.5	616.5	616.5
	1.656	615	615.5	614
	1.657	615	614	617
	1.658	612	615.5	616
	1.659	613	616.5	619
	1.66	613.5	617	621
	1.661	615.5	619.5	616.5
	1.662	615.5	615.5	620.5
	1.663	613.5	614	620.5
	1.664	613	616	621
	1.665	613	615.5	614.5
	1.666	613	618	620.5
	1.667	613	615.5	620
	1.668	613	616	620.5
	1.669	610	618	620
	1.67	614.5	615	621
	1.671	612	616.5	622
	1.672	613	616	620
	1.673	609.5	616.5	620
	1.674	617	615	620.5
	1.675	615	617.5	622.5
	1.676	615.5	614	622
	1.677	614.5	616	621.5
	1.678	612	618.5	624.5
	1.679	610.5	618.5	620.5
	1.68	615	616	621.5
	1.681	613.5	614	621.5
	1.682	611.5	615.5	622
	1.683	617.5	615	623.5
	1.684	616	615.5	621.5
	1.685	619	616	625
	1.686	615.5	616.5	620.5
	1.687	616.5	616.5	622.5
	1.688	616.5	615.5	622
	1.689	617.5	616	622.5
	1.69	616	616	623.5
	1.691	614	616	625.5
	1.692	614	616.5	625.5
	1.693	615.5	615.5	623
	1.694	615.5	614.5	628.5
	1.695	617	615	624
	1.696	617	614	625.5
	1.697	618	614.5	627
	1.698	617.5	610.5	625
	1.699	612	614	626.5
	1.7	611.5	614	627.5
	1.701	617	615.5	627.5
	1.702	619.5	616	625.5
	1.703	615.5	617	626.5
	1.704	617.5	616.5	627
	1.705	618	615	628.5
	1.706	615	616.5	625.5
	1.707	612	615	628
	1.708	618	614.5	628
	1.709	614	616	628.5
	1.71	616	614.5	630
	1.711	617.5	618	627.5
	1.712	617.5	618.5	624.5
	1.713	616	616	628
	1.714	617	615.5	628.5
	1.715	619.5	612	625.5
	1.716	615.5	615	626.5
	1.717	613.5	615.5	629
	1.718	616	618.5	627
	1.719	615.5	619	624
	1.72	616.5	619	626.5
	1.721	615.5	616.5	625.5
	1.722	616.5	615.5	626.5
	1.723	612	618	627.5
	1.724	615.5	617	623
	1.725	619	622	628.5
	1.726	617.5	618	623
	1.727	614.5	615	625
	1.728	615	614	623.5
	1.729	619.5	616.5	624.5
	1.73	620	618.5	625
	1.731	614	615	623
	1.732	617	618	622
	1.733	616.5	618.5	624
	1.734	618	618	622
	1.735	616	616.5	622.5
	1.736	613.5	619	624
	1.737	620	618.5	622.5
	1.738	614	618.5	621.5
	1.739	618.5	617	622
	1.74	616.5	619.5	622
	1.741	615	618.5	624.5
	1.742	616.5	617.5	621.5
	1.743	619.5	616.5	619.5
	1.744	612.5	619.5	617.5
	1.745	615	620.5	620
	1.746	618	617	622
	1.747	617	617	619
	1.748	616.5	616	620.5
	1.749	615	617	621
	1.75	619	615.5	618
	1.751	618	620.5	621
	1.752	615.5	617.5	621
	1.753	616.5	612	620.5
	1.754	617.5	618.5	620
	1.755	618	616.5	619.5
	1.756	617.5	617.5	620
	1.757	615	619	619.5
	1.758	621.5	617	622
	1.759	615.5	619	619
	1.76	617.5	615.5	619
	1.761	616	619	623
	1.762	621	616.5	622
	1.763	616	621.5	621.5
	1.764	621	616.5	619.5
	1.765	616	617.5	620.5
	1.766	619	618.5	621
	1.767	620.5	618	620.5
	1.768	615.5	617.5	623
	1.769	615.5	616	621
	1.77	618.5	617.5	622.5
	1.771	618	619.5	620
	1.772	616	621.5	623
	1.773	622	619.5	622
	1.774	619	616.5	623.5
	1.775	619.5	618	622
	1.776	619	620.5	622
	1.777	620	615.5	623.5
	1.778	616.5	620	623
	1.779	616	619.5	621
	1.78	619	620.5	625
	1.781	622	618	624.5
	1.782	616	622	624.5
	1.783	618.5	619.5	625
	1.784	621	619	622.5
	1.785	615.5	622.5	623.5
	1.786	620	622	625
	1.787	618.5	622	623
	1.788	617.5	621	625
	1.789	617.5	619	624.5
	1.79	617.5	619.5	626
	1.791	618.5	615.5	626.5
	1.792	618.5	620.5	625
	1.793	618.5	617	626
	1.794	620	618.5	628.5
	1.795	618	621	628.5
	1.796	618	617.5	630
	1.797	621	620.5	630
	1.798	619.5	618	627.5
	1.799	621	621	629
	1.8	621	621.5	628.5
	1.801	618	619.5	628.5
	1.802	618.5	618	626.5
	1.803	619.5	620.5	633.5
	1.804	621	618	630.5
	1.805	618	621	628.5
	1.806	619.5	619.5	631
	1.807	619.5	618	630
	1.808	617.5	620.5	632.5
	1.809	620.5	619.5	629
	1.81	619	621.5	630.5
	1.811	619.5	618	631
	1.812	621	618.5	631
	1.813	617.5	618.5	629.5
	1.814	614.5	618	634.5
	1.815	618.5	615.5	633.5
	1.816	621	619.5	632.5
	1.817	618	618.5	634.5
	1.818	618.5	619	632.5
	1.819	616	617	631
	1.82	618.5	616.5	633.5
	1.821	619.5	615.5	631
	1.822	618.5	618	631
	1.823	615.5	616	631
	1.824	620	619.5	632.5
	1.825	621	618.5	628
	1.826	618.5	616.5	631
	1.827	616.5	621.5	630.5
	1.828	620.5	617	632.5
	1.829	621.5	614.5	628.5
	1.83	620.5	617	630
	1.831	621.5	616.5	630
	1.832	618	616	629
	1.833	618	617.5	632.5
	1.834	619.5	617.5	631
	1.835	619	620.5	629.5
	1.836	619	617.5	631
	1.837	621	618.5	627.5
	1.838	620	618	630
	1.839	621.5	618	624.5
	1.84	619	623	629
	1.841	621	616.5	627
	1.842	621.5	622	626.5
	1.843	621.5	620.5	626.5
	1.844	622	621	627
	1.845	623	619.5	624.5
	1.846	620.5	620.5	628.5
	1.847	622	621.5	627
	1.848	621	622	627.5
	1.849	622.5	626	628.5
	1.85	622	623	623.5
	1.851	621	620	626.5
	1.852	621.5	626.5	624
	1.853	619.5	624	625.5
	1.854	620	626	626.5
	1.855	619.5	626	624.5
	1.856	622	629.5	628
	1.857	622	624	625.5
	1.858	621	626.5	624.5
	1.859	621.5	629	627.5
	1.86	618	625	624.5
	1.861	621	629	624.5
	1.862	619.5	627.5	624.5
	1.863	620	625.5	622.5
	1.864	620	630.5	622.5
	1.865	619	630	622.5
	1.866	619	629	624
	1.867	619.5	628.5	623.5
	1.868	615.5	628.5	623
	1.869	619.5	625.5	621.5
	1.87	621	628.5	621.5
	1.871	622	630.5	617.5
	1.872	619.5	631.5	622.5
	1.873	617.5	628	620.5
	1.874	618.5	632.5	619.5
	1.875	618.5	632.5	621.5
	1.876	617	629	617
	1.877	613.5	631	619
	1.878	620.5	630.5	615.5
	1.879	621	629.5	616.5
	1.88	620	631	617.5
	1.881	615.5	632.5	619
	1.882	621	630.5	615.5
	1.883	620	631	615.5
	1.884	618	628.5	616
	1.885	618.5	628	614.5
	1.886	619	631.5	615
	1.887	618.5	631	613.5
	1.888	616	630	612
	1.889	617	632.5	609.5
	1.89	617.5	628.5	616
	1.891	620	630.5	608.5
	1.892	621.5	629.5	612
	1.893	620.5	631	604.5
	1.894	621.5	627.5	610
	1.895	622	629	607.5
	1.896	621	629.5	608.5
	1.897	621	628.5	606
	1.898	622	628.5	606.5
	1.899	624.5	627	603.5
	1.9	619.5	628	607.5
	1.901	623.5	629	604
	1.902	622.5	625	602.5
	1.903	623.5	627	603
	1.904	624	626.5	605.5
	1.905	622	628	602.5
	1.906	625	627	602.5
	1.907	625.5	625	600.5
	1.908	622	625	598.5
	1.909	625.5	623.5	597.5
	1.91	620	624	598
	1.911	623	622	598
	1.912	626	621	596
	1.913	625.5	625.5	597
	1.914	624	624	595
	1.915	622	622	594
	1.916	622.5	621	594.5
	1.917	622	623	595
	1.918	623	620	590
	1.919	625.5	622	591
	1.92	624	620	589.5
	1.921	622	621	591
	1.922	621	621	589.5
	1.923	621.5	617	588
	1.924	619.5	621	585
	1.925	617	618.5	586.5
	1.926	621	617	588
	1.927	620.5	619.5	586.5
	1.928	618.5	619	582.5
	1.929	620	618.5	583.5
	1.93	621.5	616.5	581
	1.931	618.5	616	578.5
	1.932	615.5	617	580
	1.933	616	616.5	577
	1.934	615	617	577
	1.935	618	615.5	579
	1.936	615.5	613.5	577.5
	1.937	613.5	616.5	575
	1.938	614.5	615.5	575
	1.939	612	613.5	573.5
	1.94	611.5	615.5	574.5
	1.941	608.5	615.5	573.5
	1.942	613.5	612.5	571.5
	1.943	610.5	614.5	569
	1.944	605	615	569
	1.945	608.5	615.5	565.5
	1.946	607	616.5	566.5
	1.947	606	613	565.5
	1.948	602.5	614.5	563.5
	1.949	606.5	614	560
	1.95	602.5	612	559.5
	1.951	603	612	558
	1.952	602	615.5	559.5
	1.953	604	613	560.5
	1.954	598.5	610.5	555
	1.955	598.5	614.5	554
	1.956	599	614.5	554.5
	1.957	597	614.5	553.5
	1.958	599	616.5	549.5
	1.959	600	616	551.5
	1.96	595.5	614	550.5
	1.961	599	616	547
	1.962	596.5	615.5	547
	1.963	597	615.5	544
	1.964	594	617.5	544
	1.965	593.5	617.5	541.5
	1.966	596.5	616.5	540
	1.967	597	617.5	538
	1.968	594	616	539
	1.969	592.5	616	535
	1.97	592.5	618	534
	1.971	589.5	611	531.5
	1.972	588	615.5	532
	1.973	588	618	531
	1.974	587.5	614.5	523.5
	1.975	588.5	615.5	526
	1.976	585	611	522
	1.977	585.5	614	522
	1.978	582.5	615	518.5
	1.979	583	610.5	515.5
	1.98	580	616	512
	1.981	581	613.5	513
	1.982	584.5	613.5	513
	1.983	581	607.5	510.5
	1.984	579	613.5	503
	1.985	579.5	612	503
	1.986	575	611.5	500
	1.987	575	610.5	498
	1.988	575.5	610	499
	1.989	574.5	607	493
	1.99	575	608.5	489.5
	1.991	567.5	608.5	486.5
	1.992	568.5	606	483.5
	1.993	569.5	603.5	480
[truncated: 5,006 more rows]

## Sheet: G
DataTypeVer2.0	Time	Fz	Fz	Fz
NumberOfData		15000	15000	15000
PreTriggerData		0	0	0
SamplingTime[ms]		1	1	1
DataLabel		X1:CMJ	X2:CMJ	X3:CMJ
DataUnit	sec	N	N	N
	0	671	674.5	675
	0.001	675	672.5	671.5
	0.002	672	676	674
	0.003	673.5	672.5	674
	0.004	674	676.5	674
	0.005	671.5	675	675
	0.006	672	674	672
	0.007	672.5	672.5	672
	0.008	672.5	671.5	676
	0.009	673.5	675	672
	0.01	675.5	674.5	671
	0.011	672.5	675	673
	0.012	673.5	669.5	671
	0.013	670.5	670	669.5
	0.014	672	671	673
	0.015	674.5	672.5	671
	0.016	670	672.5	673.5
	0.017	672.5	673.5	673
	0.018	669	675.5	674.5
	0.019	673.5	674.5	672.5
	0.02	669.5	672.5	671
	0.021	672	669.5	671.5
	0.022	674	673	670.5
	0.023	673	670	670
	0.024	669.5	674	669.5
	0.025	675	675	672.5
	0.026	671.5	674	675
	0.027	674	675.5	670
	0.028	670.5	673.5	672
	0.029	672	674.5	669.5
	0.03	674.5	675.5	673
	0.031	672.5	674	674.5
	0.032	674	669	669.5
	0.033	669.5	669.5	673
	0.034	670	668.5	672.5
	0.035	672	669	671
	0.036	673	676	676
	0.037	675	673	673.5
	0.038	670.5	672	674.5
	0.039	672	672.5	670
	0.04	671	670.5	672.5
	0.041	671	673.5	671.5
	0.042	673	673.5	671
	0.043	674	670.5	674.5
	0.044	673.5	670.5	675
	0.045	671	672.5	669.5
	0.046	671	673.5	673
	0.047	669.5	669.5	672
	0.048	674	670.5	671.5
	0.049	673	668.5	672
	0.05	674.5	672.5	674.5
	0.051	670.5	674	677
	0.052	670	669.5	674
	0.053	673.5	672	676
	0.054	670	669.5	672
	0.055	671	668.5	672.5
	0.056	669.5	671	671.5
	0.057	672.5	671	671
	0.058	671	670	673
	0.059	670	667.5	671
	0.06	671	669.5	672
	0.061	672	668.5	671.5
	0.062	671.5	666.5	675
	0.063	672	671.5	674
	0.064	674	670.5	671.5
	0.065	675	669.5	671
	0.066	672	669	675
	0.067	671	669.5	669.5
	0.068	672	669	673.5
	0.069	672	669.5	671.5
	0.07	673.5	668.5	671.5
	0.071	673	672	674.5
	0.072	670.5	672	672.5
	0.073	674	671	670.5
	0.074	673	669.5	675
	0.075	669	669.5	675
	0.076	672	671.5	670.5
	0.077	671.5	672	675.5
	0.078	673.5	668.5	673.5
	0.079	670.5	670.5	673.5
	0.08	669.5	667.5	674.5
	0.081	671	670.5	674.5
	0.082	673.5	669.5	672.5
	0.083	671.5	673	671.5
	0.084	672	669.5	674.5
	0.085	675	665.5	672.5
	0.086	673	671	677
	0.087	676.5	673.5	673.5
	0.088	673.5	670.5	676
	0.089	671.5	668.5	672
	0.09	673.5	670.5	670.5
	0.091	671.5	669	671.5
	0.092	676	669.5	671
	0.093	676	667	673.5
	0.094	674.5	671.5	675
	0.095	676	669	676
	0.096	675	672.5	672.5
	0.097	674.5	670.5	671
	0.098	672	668	672.5
	0.099	675	666	672
	0.1	676	670	671
	0.101	677	671.5	673
	0.102	670.5	670	673.5
	0.103	673	670.5	673
	0.104	673	669.5	674
	0.105	671	671.5	674
	0.106	670	669.5	675
	0.107	673.5	668	676.5
	0.108	677	668.5	673
	0.109	672.5	669.5	672.5
	0.11	670	669	671.5
	0.111	670.5	670	676
	0.112	675.5	670.5	672.5
	0.113	679	669	669.5
	0.114	675	672.5	668.5
	0.115	675	669	674
	0.116	676.5	667	672
	0.117	674.5	672	673.5
	0.118	676	671	675.5
	0.119	671	667.5	671
	0.12	675	671	672
	0.121	676	671.5	671.5
	0.122	677	668.5	674
	0.123	671	670.5	672
	0.124	676.5	669.5	672.5
	0.125	673	674	673.5
	0.126	677.5	669.5	674.5
	0.127	674.5	672.5	673
	0.128	677.5	669.5	674
	0.129	675	668.5	673
	0.13	670.5	669.5	673.5
	0.131	672	673	673
	0.132	673	668	673
	0.133	673.5	665.5	670.5
	0.134	671	670.5	672
	0.135	674.5	672.5	673.5
	0.136	673.5	668	675
	0.137	677	669	672
	0.138	672.5	672	672.5
	0.139	672	672.5	672
	0.14	673.5	668	672
	0.141	673	675	674.5
	0.142	674	674.5	671
	0.143	672.5	669.5	669.5
	0.144	675	670.5	672
	0.145	670	671	671
	0.146	672	669.5	669.5
	0.147	675	669	669.5
	0.148	673.5	675	671.5
	0.149	674	671	670.5
	0.15	668.5	675	669.5
	0.151	672	670.5	670.5
	0.152	672.5	671.5	673
	0.153	673	669.5	671.5
	0.154	674.5	668.5	672
	0.155	671.5	670.5	672
	0.156	670	674	671
	0.157	669.5	670	669.5
	0.158	670.5	671.5	673.5
	0.159	672.5	671	667.5
	0.16	669	672.5	672
	0.161	674	672.5	671.5
	0.162	673.5	672.5	668
	0.163	670	671	670.5
	0.164	671	669.5	671
	0.165	671	674	673.5
	0.166	673.5	673	671
	0.167	674.5	673.5	670.5
	0.168	668.5	669.5	670
	0.169	671	675	669.5
	0.17	668.5	673.5	672
	0.171	668.5	676.5	671
	0.172	673.5	676	669.5
	0.173	670.5	675	668.5
	0.174	672	674	669.5
	0.175	669.5	677	670.5
	0.176	669.5	671.5	671.5
	0.177	669.5	671.5	669.5
	0.178	675.5	671	669.5
	0.179	671.5	676	672.5
	0.18	669.5	678	669
	0.181	672	677	676.5
	0.182	669.5	672.5	671
	0.183	671	673.5	673.5
	0.184	669.5	675	670.5
	0.185	669	674	672.5
	0.186	672.5	673	671
	0.187	672.5	673	671.5
	0.188	671.5	674	670.5
	0.189	672.5	672	670.5
	0.19	672	675.5	674
	0.191	672	672.5	670.5
	0.192	670.5	676	668.5
	0.193	673	674	673
	0.194	668.5	677	672.5
	0.195	671	673.5	671.5
	0.196	671	676	668.5
	0.197	670	675	673
	0.198	672.5	676.5	671
	0.199	671.5	674.5	672.5
	0.2	670.5	674.5	669
	0.201	669	674.5	671
	0.202	669.5	673.5	673.5
	0.203	666.5	674	670
	0.204	670	674.5	672
	0.205	674	676	670
	0.206	670.5	674.5	673
	0.207	672	674.5	672
	0.208	667.5	673.5	673
	0.209	674.5	673	671
	0.21	669	672.5	669.5
	0.211	673	676	669.5
	0.212	669.5	672.5	667.5
	0.213	669	672.5	671
	0.214	669.5	674	668
	0.215	672	676.5	675
	0.216	669.5	677	670
	0.217	669.5	671.5	669.5
	0.218	668	674.5	669
	0.219	669	674	669.5
	0.22	673	674.5	669.5
	0.221	666.5	675	670.5
	0.222	668.5	671	672
	0.223	665.5	674.5	670.5
	0.224	670.5	671.5	674
	0.225	668.5	670.5	672
	0.226	668	673.5	669.5
	0.227	667.5	672	672
	0.228	671	675	673
	0.229	668.5	677	669
	0.23	668.5	674	672
	0.231	669.5	674	670
	0.232	669	670.5	672.5
	0.233	667	673.5	667.5
	0.234	666.5	673.5	672.5
	0.235	667	672.5	673
	0.236	667	671.5	671
	0.237	669	669.5	669.5
	0.238	667	672.5	673.5
	0.239	668	672.5	669.5
	0.24	668	668.5	669.5
	0.241	666.5	672	669.5
	0.242	669	673.5	669.5
	0.243	665	675	671.5
	0.244	673	672.5	672
	0.245	669.5	667.5	667.5
	0.246	670.5	671	672
	0.247	667	670	669.5
	0.248	667.5	671.5	671.5
	0.249	666.5	671.5	669
	0.25	667	675	672
	0.251	666.5	672.5	669.5
	0.252	668	666.5	671.5
	0.253	671	672	674.5
	0.254	669	670	674
	0.255	667.5	669.5	670.5
	0.256	668	671	675.5
	0.257	669	670	674
	0.258	668.5	673	674
	0.259	668	669.5	676.5
	0.26	672.5	670.5	674
	0.261	668.5	669.5	675.5
	0.262	669.5	672.5	677.5
	0.263	671	670.5	675.5
	0.264	669.5	669	674.5
	0.265	670.5	671.5	675
	0.266	668.5	669	672.5
	0.267	671	669	672
	0.268	669.5	670	677.5
	0.269	670	672	675
	0.27	667	675	675.5
	0.271	667.5	670	669.5
	0.272	668.5	671.5	675
	0.273	669.5	671	675
	0.274	669.5	669.5	673.5
	0.275	670.5	672.5	677.5
	0.276	672	669.5	676
	0.277	671	669.5	677.5
	0.278	671	670.5	677.5
	0.279	671.5	669.5	677.5
	0.28	669.5	669	676
	0.281	671.5	670	678.5
	0.282	672	669.5	678.5
	0.283	669.5	669.5	674.5
	0.284	671	675.5	677
	0.285	672	667.5	676
	0.286	670.5	669.5	677
	0.287	674	669.5	673.5
	0.288	674	669.5	677.5
	0.289	670	672	678.5
	0.29	674	667.5	678
	0.291	674.5	669	676
	0.292	675	672.5	676.5
	0.293	673	669.5	677
	0.294	673.5	671.5	677.5
	0.295	673	669.5	677
	0.296	674	669.5	675.5
	0.297	674	671	673.5
	0.298	674	670.5	678
	0.299	675.5	671	678
	0.3	670.5	669	680.5
	0.301	671.5	670.5	677
	0.302	675	669	677
	0.303	677	672.5	677.5
	0.304	675	669	677
	0.305	673	673.5	679
	0.306	676.5	669.5	675.5
	0.307	674	670.5	675.5
	0.308	672.5	672	674
	0.309	673	673	678
	0.31	674	668	675.5
	0.311	675.5	669.5	672.5
	0.312	677	671.5	675.5
	0.313	676	676	675
	0.314	676	669.5	678
	0.315	676.5	668.5	678.5
	0.316	678	672.5	671.5
	0.317	676.5	671	672.5
	0.318	675	673.5	673.5
	0.319	676.5	672	672.5
	0.32	677.5	672	679
	0.321	676.5	673	676.5
	0.322	673	673.5	673.5
	0.323	677	669.5	674
	0.324	676	674	673
	0.325	677	671.5	672.5
	0.326	675.5	672	675
	0.327	678.5	667.5	677
	0.328	678.5	672.5	672
	0.329	679.5	670.5	674
	0.33	676.5	672	672
	0.331	675	671	675.5
	0.332	678.5	673	671
	0.333	674.5	670	671
	0.334	675	675	672
	0.335	673.5	672	675
	0.336	679	672	673.5
	0.337	675.5	673	669.5
	0.338	675.5	670.5	675
	0.339	677.5	672.5	674.5
	0.34	676	671.5	671.5
	0.341	677	674	672
	0.342	674.5	669.5	669.5
	0.343	673	671.5	669.5
	0.344	675.5	672.5	675
	0.345	670.5	669.5	675
	0.346	672.5	669.5	671.5
	0.347	675	671.5	672.5
	0.348	674	670.5	670
	0.349	674	673.5	673
	0.35	672	670.5	671.5
	0.351	674.5	672.5	673
	0.352	674	673	669.5
	0.353	672	671.5	669.5
	0.354	673.5	671.5	671
	0.355	674	670.5	671
	0.356	675.5	671	670.5
	0.357	675	669.5	672.5
	0.358	671.5	674	671.5
	0.359	673.5	672.5	671
	0.36	669.5	673	672
	0.361	672.5	675.5	672.5
	0.362	673	668	672
	0.363	671.5	672.5	671.5
	0.364	671.5	671	670
	0.365	671	675.5	672.5
	0.366	666.5	671	675.5
	0.367	673	673.5	671
	0.368	670.5	669.5	672
	0.369	671	672.5	670.5
	0.37	670	672	671
	0.371	670.5	671	669
	0.372	668.5	669.5	669
	0.373	669	674.5	671.5
	0.374	669.5	675	669
	0.375	673	671	669.5
	0.376	667.5	670.5	672
	0.377	671	672	673.5
	0.378	668.5	669.5	670
	0.379	669.5	675.5	670
	0.38	669.5	675.5	673.5
	0.381	672	670	669.5
	0.382	669.5	669.5	674
	0.383	669.5	675	671
	0.384	673	671.5	670
	0.385	670	672.5	672
	0.386	670	673	673.5
	0.387	669	674.5	671.5
	0.388	668.5	674.5	675
	0.389	669	671.5	672.5
	0.39	666.5	673.5	669
	0.391	671.5	675	674
	0.392	668	674	668.5
	0.393	670	671.5	672.5
	0.394	669	671	672
	0.395	668.5	671	671
	0.396	669	671	669.5
	0.397	669.5	671.5	669.5
	0.398	671	673.5	672.5
	0.399	669.5	672	669.5
	0.4	673	672	673
	0.401	669.5	671	671
	0.402	669.5	671.5	675
	0.403	671.5	670.5	674
	0.404	671.5	675.5	671.5
	0.405	672.5	673	672.5
	0.406	669.5	674.5	670
	0.407	669.5	672.5	670.5
	0.408	672	673.5	676.5
	0.409	669.5	673	669.5
	0.41	671	671.5	675
	0.411	668.5	670.5	673.5
	0.412	669.5	674.5	671.5
	0.413	674	672	673.5
	0.414	669	674.5	672
	0.415	671	671.5	671.5
	0.416	671.5	674	671
	0.417	669.5	673.5	674.5
	0.418	672	676.5	672
	0.419	668	676	670
	0.42	673	673	671
	0.421	668.5	673.5	671
	0.422	673.5	673.5	669.5
	0.423	672	676	672
	0.424	674	671	672.5
	0.425	672.5	679.5	670.5
	0.426	670	673	673
	0.427	671	675.5	672.5
	0.428	673	674.5	669.5
	0.429	674	672.5	672.5
	0.43	670.5	673	673.5
	0.431	672.5	671.5	672.5
	0.432	672	675	670
	0.433	673	675	671
	0.434	671	672	676.5
	0.435	674	671.5	673.5
	0.436	671	673.5	668.5
	0.437	673	672.5	670.5
	0.438	669.5	671.5	672
	0.439	670.5	673	672.5
	0.44	672	671.5	671.5
	0.441	671	674.5	669
	0.442	672	675	669.5
	0.443	670	674	672.5
	0.444	672	672.5	670.5
	0.445	671	674.5	671.5
	0.446	673.5	674	671.5
	0.447	675	674.5	669
	0.448	671.5	673	674.5
	0.449	672	672.5	671
	0.45	670.5	672	674.5
	0.451	670.5	674.5	670.5
	0.452	672.5	671.5	674
	0.453	669.5	672.5	674
	0.454	669.5	673	674.5
	0.455	669.5	671.5	673
	0.456	670	670.5	669.5
	0.457	670.5	673.5	673.5
	0.458	671	671.5	672.5
	0.459	669	674	672
	0.46	668	675	672
	0.461	667	671.5	674.5
	0.462	669.5	675	673.5
	0.463	671.5	674	675
	0.464	669	673.5	674
	0.465	672.5	673	670.5
	0.466	668.5	674	668.5
	0.467	671	674	673.5
	0.468	669.5	670.5	676.5
	0.469	672.5	677.5	675
	0.47	669	672	675.5
	0.471	670	673.5	674
	0.472	672	675	676.5
	0.473	674	672	674
	0.474	672	671.5	672
	0.475	671.5	672	674.5
	0.476	674.5	669	671.5
	0.477	670.5	675	671.5
	0.478	669.5	672.5	672.5
	0.479	673	674.5	676
	0.48	669	676	672.5
	0.481	669	673	670
	0.482	673.5	673.5	671
	0.483	668	673.5	674
	0.484	673.5	676	672
	0.485	671.5	669.5	673
	0.486	670.5	671	671.5
	0.487	669	674	671.5
	0.488	669.5	675	673
	0.489	668.5	672.5	672
	0.49	668	673	674.5
	0.491	672.5	671	677.5
	0.492	670	670	676
	0.493	671.5	672.5	674
	0.494	673.5	672	673
	0.495	671	673.5	671.5
	0.496	671	671.5	674
	0.497	670.5	674	671
	0.498	669.5	673	671
	0.499	671.5	669.5	672.5
	0.5	670.5	673	671.5
	0.501	673	670	672
	0.502	670	671	672.5
	0.503	672.5	672.5	670.5
	0.504	671	671	674.5
	0.505	671.5	671	676.5
	0.506	669.5	675	674
	0.507	670	671	673
	0.508	671	670.5	677
	0.509	669.5	671	675
	0.51	669.5	675	672.5
	0.511	673	674	673.5
	0.512	669.5	675.5	675
	0.513	675	672	677
	0.514	669.5	672.5	670
	0.515	671	672.5	672.5
	0.516	668.5	671.5	675
	0.517	673	669	672.5
	0.518	670	671	677
	0.519	673	669.5	675
	0.52	671.5	669.5	676.5
	0.521	670.5	670.5	673
	0.522	667.5	674.5	676.5
	0.523	670.5	671	675.5
	0.524	674.5	670	676.5
	0.525	671	669	674.5
	0.526	672.5	672	673.5
	0.527	669.5	673.5	677
	0.528	673.5	673.5	676
	0.529	669.5	669.5	673.5
	0.53	671	671	678.5
	0.531	675.5	668.5	672
	0.532	671.5	669.5	674.5
	0.533	669.5	669.5	675
	0.534	669.5	667	676
	0.535	672.5	669.5	676
	0.536	671	671.5	677
	0.537	669.5	671.5	669.5
	0.538	669.5	671	675
	0.539	669.5	672	676
	0.54	672.5	668	676.5
	0.541	672	669	676.5
	0.542	670.5	672	677
	0.543	672.5	669.5	672
	0.544	672	668	675.5
	0.545	672	671.5	678
	0.546	670	670	678
	0.547	672.5	672	675
	0.548	669.5	670.5	677
	0.549	676.5	668.5	675
	0.55	672	672.5	675.5
	0.551	674	668.5	675
	0.552	669.5	669.5	674.5
	0.553	673.5	667.5	674
	0.554	674.5	670	677
	0.555	673.5	669.5	673.5
	0.556	673	668	679.5
	0.557	673.5	669.5	676
	0.558	674	670	671
	0.559	673	671	674
	0.56	673	672.5	671
	0.561	669.5	672.5	677
	0.562	672	665.5	676
	0.563	671.5	670	674.5
	0.564	672.5	669.5	676.5
	0.565	670.5	673	674
	0.566	674.5	669	675
	0.567	675.5	667.5	673.5
	0.568	671.5	669.5	678.5
	0.569	671.5	671.5	676
	0.57	677	671	674
	0.571	673.5	669.5	674
	0.572	670	672.5	675.5
	0.573	671.5	669.5	673.5
	0.574	670	669.5	673.5
	0.575	674	672.5	680
	0.576	673	669.5	675.5
	0.577	674.5	672	676
	0.578	670.5	672.5	677
	0.579	669.5	671.5	674
	0.58	674.5	672	675
	0.581	673	669.5	673.5
	0.582	672.5	669.5	675
	0.583	675.5	670.5	675.5
	0.584	675	674	673
	0.585	673.5	669.5	672.5
	0.586	674	668	676.5
	0.587	671	670	674
	0.588	671	674.5	671
	0.589	669.5	673	677
	0.59	670	670	674
	0.591	671	673	675.5
	0.592	672.5	669.5	675
	0.593	669.5	667	672
	0.594	674.5	672	675
	0.595	671.5	673	677
	0.596	675	669.5	676.5
	0.597	671.5	669	674.5
	0.598	672	671	677
	0.599	674.5	670.5	671
	0.6	673	670	672
	0.601	675	672	674
	0.602	671.5	673	673.5
	0.603	676.5	668.5	674.5
	0.604	674	671	676
	0.605	674.5	672	673
	0.606	674.5	670.5	671
	0.607	671	673	672.5
	0.608	673.5	673.5	675
	0.609	672	673.5	672.5
	0.61	671	671	671.5
	0.611	671	670	675
	0.612	674	670.5	674
	0.613	672	670.5	672
	0.614	671	672.5	677
	0.615	674.5	674	673
	0.616	676	672	674
	0.617	674	673	673
	0.618	673.5	671	674.5
	0.619	671	674.5	676
	0.62	672.5	672.5	672.5
	0.621	673.5	671	675.5
	0.622	674	676	669.5
	0.623	669.5	672.5	673.5
	0.624	672	674	675
	0.625	673	674.5	675
	0.626	674.5	674	673
	0.627	672	676.5	676.5
	0.628	672.5	676.5	672.5
	0.629	671	673.5	668.5
	0.63	673.5	676	671.5
	0.631	672	674	674
	0.632	672.5	671	674.5
	0.633	672	672.5	671
	0.634	674.5	673.5	673
	0.635	671	677	670.5
	0.636	675	673.5	673
	0.637	670.5	675	671
	0.638	673	673	672
	0.639	673	673	674.5
	0.64	670.5	672.5	669.5
	0.641	674	674.5	671
	0.642	671.5	678	673
	0.643	673	673	670.5
	0.644	672.5	674.5	672
	0.645	674	676.5	671
	0.646	671	674	672
	0.647	672	674	672.5
	0.648	671.5	677	669.5
	0.649	672	673.5	671.5
	0.65	671	674.5	669.5
	0.651	672.5	673	669.5
	0.652	672	676	672
	0.653	669.5	677	669
	0.654	672	673.5	671
	0.655	671	671	670
	0.656	671.5	673	668.5
	0.657	669.5	674.5	671.5
	0.658	673	673.5	668
	0.659	669	676	668
	0.66	668.5	672	670.5
	0.661	673.5	674	670
	0.662	669.5	676.5	671.5
	0.663	670.5	673.5	669
	0.664	669.5	670	671
	0.665	669	674	666.5
	0.666	670.5	676	671.5
	0.667	672	674	668
	0.668	671	672	669
	0.669	669.5	675.5	670.5
	0.67	668	673	667.5
	0.671	667.5	672.5	671
	0.672	667.5	673.5	668.5
	0.673	668	673	671
	0.674	670	674	672
	0.675	669.5	673	668
	0.676	671	675.5	669.5
	0.677	665.5	677	667.5
	0.678	669	674.5	669.5
	0.679	672	673	668.5
	0.68	668.5	672	670.5
	0.681	666.5	674	674
	0.682	666.5	673	672
	0.683	666.5	672	670.5
	0.684	669.5	676	670.5
	0.685	667	672.5	670
	0.686	666	671	671
	0.687	665.5	672	671
	0.688	669	674.5	668.5
	0.689	668.5	675.5	673
	0.69	672	672.5	674.5
	0.691	666.5	672	670.5
	0.692	670	672.5	671
	0.693	668	673	671
	0.694	669.5	671.5	672
	0.695	668.5	672.5	674
	0.696	667	673	670.5
	0.697	671	669.5	669.5
	0.698	669.5	673	671
	0.699	669.5	673.5	671.5
	0.7	670	672.5	671.5
	0.701	670.5	676	671.5
	0.702	666.5	673.5	671.5
	0.703	669.5	671.5	672
	0.704	669.5	672.5	673
	0.705	671	672	668.5
	0.706	671	671.5	672
	0.707	666.5	671.5	669.5
	0.708	669.5	671	669.5
	0.709	668.5	672.5	669
	0.71	671	673	670.5
	0.711	668.5	672.5	672
	0.712	665.5	672	671
	0.713	668.5	671	672.5
	0.714	668.5	673	669.5
	0.715	668	673	670.5
	0.716	669.5	673	675
	0.717	671	674.5	672
	0.718	670.5	673	669.5
	0.719	669.5	673	673
	0.72	673	669.5	669.5
	0.721	669	670.5	671.5
	0.722	670	671.5	673.5
	0.723	671.5	669.5	671.5
	0.724	669.5	672	669
	0.725	668.5	673.5	671
	0.726	669.5	669	671.5
	0.727	672.5	675	667.5
	0.728	671	670.5	672.5
	0.729	670.5	673	674
	0.73	672	670	671.5
	0.731	668.5	674	671
	0.732	671	668.5	671
	0.733	672	672	672
	0.734	669.5	671.5	675.5
	0.735	671.5	672	672.5
	0.736	671	672.5	671
	0.737	665.5	671	673
	0.738	673	672	674
	0.739	671	672	672.5
	0.74	669.5	672.5	672
	0.741	669.5	672	672
	0.742	671	669.5	671.5
	0.743	668.5	670.5	673
	0.744	672	671	672
	0.745	670.5	671.5	674
	0.746	670.5	673.5	676.5
	0.747	672	669.5	672.5
	0.748	670.5	672	675
	0.749	670	671	676
	0.75	674	670.5	675.5
	0.751	673	672	671
	0.752	671.5	669.5	672
	0.753	669.5	669.5	673.5
	0.754	671	673	674
	0.755	667.5	671.5	677.5
	0.756	671	672	673
	0.757	671	672.5	676
	0.758	669.5	669.5	675.5
	0.759	667.5	673	677.5
	0.76	670	670.5	677
	0.761	672	671	672.5
	0.762	669.5	672	676
	0.763	671	671	674
	0.764	669.5	672	675
	0.765	668	667.5	675
	0.766	668	669	675.5
	0.767	669.5	670	678
	0.768	672	673.5	679.5
	0.769	672.5	671.5	675.5
	0.77	674	670.5	677
	0.771	671.5	674	676
	0.772	669	671	677
	0.773	669.5	669.5	680
	0.774	671	674.5	675
	0.775	669.5	669.5	677.5
	0.776	673	673.5	672
	0.777	670.5	669.5	675.5
	0.778	673.5	670	677
	0.779	673.5	669	676.5
	0.78	672	669	675
	0.781	673.5	669	678
	0.782	669.5	672.5	678
	0.783	671.5	673.5	677
	0.784	673.5	669.5	676
	0.785	676	674	677
	0.786	676	669.5	676.5
	0.787	676.5	672.5	677
	0.788	671	673	672.5
	0.789	674	669.5	677
	0.79	671	670	675.5
	0.791	676.5	669.5	674.5
	0.792	674	673	677
	0.793	677	669.5	674.5
	0.794	673	671.5	676.5
	0.795	673	672	674
	0.796	674.5	669.5	675.5
	0.797	676	672	677
	0.798	675	671	677.5
	0.799	678.5	670.5	672.5
	0.8	676	672.5	674
	0.801	674	669.5	670.5
	0.802	675	672	675
	0.803	674	669	674.5
	0.804	674.5	671.5	673
	0.805	673.5	669.5	676.5
	0.806	673	671.5	673.5
	0.807	676.5	669.5	672.5
	0.808	674.5	671.5	673
	0.809	677	669.5	673.5
	0.81	675.5	673.5	672
	0.811	675	672	672.5
	0.812	675.5	669.5	671.5
	0.813	674	673	675.5
	0.814	678	673	676
	0.815	672	671	670.5
	0.816	677	671.5	673
	0.817	673.5	671	672
	0.818	676.5	670.5	674.5
	0.819	676	671	670
	0.82	672.5	675	669.5
	0.821	671	672	674.5
	0.822	676	674	675
	0.823	671.5	673.5	671.5
	0.824	672.5	675	671.5
	0.825	673.5	669.5	670.5
	0.826	672	674.5	671.5
	0.827	672	674.5	675
	0.828	676	677	673
	0.829	678.5	671	669.5
	0.83	674.5	677	673
	0.831	673	672.5	671
	0.832	672.5	672	672.5
	0.833	670.5	673	668.5
	0.834	670.5	672	674
	0.835	676	674	667.5
	0.836	676.5	670	669.5
	0.837	675	669.5	672.5
	0.838	671	669.5	669.5
	0.839	675	671	669.5
	0.84	672.5	670	672
	0.841	676	669.5	671
	0.842	674	671.5	675
	0.843	672.5	673.5	670.5
	0.844	673	671.5	670.5
	0.845	671.5	671.5	675
	0.846	674	673.5	671
	0.847	670	668.5	672.5
	0.848	672.5	670.5	670
	0.849	674.5	674.5	669
	0.85	671	669.5	669.5
	0.851	672.5	672.5	672.5
	0.852	673.5	671.5	673
	0.853	675	673	671.5
	0.854	672.5	671	673
	0.855	672	673	673.5
	0.856	669.5	674	670.5
	0.857	668.5	671	676
	0.858	672.5	671	674.5
	0.859	674	675	671.5
	0.86	672.5	672.5	671
	0.861	672.5	670	672
	0.862	673.5	676	672.5
	0.863	671	675	669.5
	0.864	672	673	672.5
	0.865	674.5	669.5	671.5
	0.866	671.5	670	670
	0.867	672.5	669.5	672.5
	0.868	669.5	671	673
	0.869	673	671	672
	0.87	671.5	673	666.5
	0.871	669.5	671.5	672.5
	0.872	669.5	669	668.5
	0.873	672	670	671
	0.874	672.5	672	671.5
	0.875	671	676	675
	0.876	674	676.5	673
	0.877	669.5	669	670.5
	0.878	671	675	673.5
	0.879	669.5	672.5	669.5
	0.88	671	671.5	669.5
	0.881	668.5	674	672.5
	0.882	670.5	671.5	673
	0.883	671.5	675	675.5
	0.884	670	676	670.5
	0.885	668	673	673
	0.886	669	673.5	671
	0.887	668	674.5	674.5
	0.888	665.5	669.5	672.5
	0.889	669.5	674.5	675
	0.89	669.5	675.5	675
	0.891	671	673	671
	0.892	670	674.5	672.5
	0.893	669.5	674.5	673
	0.894	672	672	670.5
	0.895	671	673	676
	0.896	669.5	675	674.5
	0.897	670.5	676.5	672.5
	0.898	669.5	673.5	671.5
	0.899	668	670.5	672
	0.9	669.5	673.5	672.5
	0.901	671	676	671
	0.902	670.5	671	670
	0.903	673	673.5	671
	0.904	671	669.5	670.5
	0.905	668.5	675	672.5
	0.906	670.5	672.5	675.5
	0.907	666.5	673	672
	0.908	669.5	673.5	674
	0.909	670.5	674	673
	0.91	673	672.5	675
	0.911	671	674	673
	0.912	671.5	674	671.5
	0.913	674	669.5	672
	0.914	672.5	673	674.5
	0.915	672	672	672.5
	0.916	671	673.5	671
	0.917	672.5	673	675
	0.918	673	674	670
	0.919	671.5	676.5	671
	0.92	670.5	674.5	674
	0.921	673.5	675.5	675
	0.922	670	674	673
	0.923	672.5	672	674
	0.924	669.5	672	671.5
	0.925	669.5	672.5	673.5
	0.926	671.5	675	672.5
	0.927	670.5	672.5	675
	0.928	674.5	677	673
	0.929	674	673.5	673.5
	0.93	671	674	674
	0.931	674	672	677
	0.932	673	675.5	676
	0.933	669.5	674	677.5
	0.934	672.5	670	672.5
	0.935	673	670	669.5
	0.936	672	673.5	673
	0.937	674	674.5	676.5
	0.938	673	673	674.5
	0.939	672.5	671	676.5
	0.94	673.5	675	677
	0.941	673.5	675	669.5
	0.942	674	675.5	673.5
	0.943	672.5	673.5	677
	0.944	676.5	673	673.5
	0.945	671.5	671	675.5
	0.946	672	671.5	676.5
	0.947	671	673	670
	0.948	673.5	670.5	675
	0.949	676	673.5	675.5
	0.95	676	671.5	669.5
	0.951	675.5	671	673
	0.952	673.5	673.5	674
	0.953	675	671.5	676
	0.954	672	672.5	674
	0.955	675.5	672.5	677
	0.956	674.5	671.5	673
	0.957	674	672.5	671.5
	0.958	673	673.5	673
	0.959	669.5	674	675
	0.96	673	671	673
	0.961	669.5	673.5	675.5
	0.962	673.5	671	672
	0.963	674.5	673	673.5
	0.964	674	668.5	675
	0.965	675.5	673.5	672
	0.966	673.5	671	674
	0.967	675	670.5	675
	0.968	672	673	677.5
	0.969	673	671	674
	0.97	673.5	674	674
	0.971	672	669.5	677
	0.972	673	669.5	671.5
	0.973	673	671	674.5
	0.974	671.5	667.5	672.5
	0.975	671	673	670
	0.976	672	674	673
	0.977	676.5	669.5	672
	0.978	674	671.5	673
	0.979	673	673	673.5
	0.98	676	669	674
	0.981	674	670	671.5
	0.982	671.5	670	673.5
	0.983	675	669.5	678
	0.984	674	669.5	670
	0.985	673	672	673.5
	0.986	672.5	669.5	672.5
	0.987	673	670.5	672.5
	0.988	676.5	669	673
	0.989	677	668.5	677
	0.99	672	669	675
	0.991	675	670.5	672.5
	0.992	678	669	675.5
	0.993	674	670.5	669.5
	0.994	674	669	671.5
	0.995	676.5	669	669.5
	0.996	673	670.5	673
	0.997	669.5	670.5	672
	0.998	673.5	666	676
	0.999	676	665.5	670.5
	1	669.5	670.5	674
	1.001	676	669	672
	1.002	672	671	672.5
	1.003	675.5	667.5	677.5
	1.004	672	672	671
	1.005	674	664.5	671
	1.006	674	669.5	675
	1.007	676	668.5	675
	1.008	673	669.5	674.5
	1.009	672	669.5	674
	1.01	672	670.5	673
	1.011	674.5	672	675
	1.012	673.5	671.5	669.5
	1.013	672.5	669	673.5
	1.014	674	672.5	674.5
	1.015	672	670	672
	1.016	671.5	668	671.5
	1.017	673	671.5	673.5
	1.018	673	669	673.5
	1.019	676	671.5	670.5
	1.02	672	671.5	674
	1.021	673	671	675
	1.022	673	668.5	671.5
	1.023	674	671.5	672
	1.024	674.5	670.5	673
	1.025	674	674	673
	1.026	672	672	673
	1.027	671.5	669.5	675
	1.028	674	671	677
	1.029	668.5	674	673.5
	1.03	676	673.5	673
	1.031	669.5	669.5	675.5
	1.032	675	672	671
	1.033	673	670	675
	1.034	672.5	672	672
	1.035	673	669.5	674
	1.036	674.5	672	674.5
	1.037	672.5	669.5	672.5
	1.038	673.5	675	673
	1.039	673.5	669.5	675
	1.04	672	672	672
	1.041	672.5	671.5	673
	1.042	675.5	672.5	673.5
	1.043	671	674	673.5
	1.044	672	668	670.5
	1.045	673.5	669	670.5
	1.046	672	672	669.5
	1.047	676.5	669.5	675
	1.048	673	670	672
	1.049	674.5	670	672
	1.05	669.5	672	671.5
	1.051	671.5	672	670.5
	1.052	674.5	671	675
	1.053	672	669.5	670
	1.054	669.5	671.5	671.5
	1.055	672	672	671
	1.056	672.5	670	676.5
	1.057	672	671	674
	1.058	673	668.5	671.5
	1.059	673.5	672	674
	1.06	670.5	675.5	672
	1.061	674.5	669.5	675
	1.062	673	670	672
	1.063	670.5	670.5	675.5
	1.064	678	670.5	669.5
	1.065	670	672.5	672.5
	1.066	673.5	671	673
	1.067	675.5	674.5	672
	1.068	674.5	673	674
	1.069	673.5	671	672
	1.07	675.5	671	676.5
	1.071	677	669.5	676
	1.072	669.5	672.5	672.5
	1.073	673	671	671
	1.074	673	673.5	673
	1.075	674	671	671
	1.076	672.5	674.5	673
	1.077	674.5	672.5	671.5
	1.078	676	669.5	676
	1.079	676	671.5	675.5
	1.08	673	673	674.5
	1.081	676	671.5	673
	1.082	673	674	669
	1.083	674	677	674
	1.084	672	675.5	672.5
	1.085	671	676	674.5
	1.086	676	675.5	670
	1.087	673	674.5	674
	1.088	669.5	674	672.5
	1.089	675	673	672
	1.09	671	672.5	675.5
	1.091	674	672	669.5
	1.092	674	674	675.5
	1.093	672.5	676.5	677
	1.094	675.5	676.5	673.5
	1.095	676.5	672.5	674
	1.096	669.5	677	672
	1.097	671.5	677	677
	1.098	673	673	675
	1.099	675	675	673
	1.1	669.5	672.5	671.5
	1.101	675	676	671.5
	1.102	675.5	677	677
	1.103	676	677	673.5
	1.104	673	675.5	672
	1.105	675.5	676	674
	1.106	673	673.5	674.5
	1.107	669.5	674.5	673.5
	1.108	675	677	674.5
	1.109	674	670.5	673
	1.11	673	674.5	676
	1.111	670.5	676	672.5
	1.112	674	676.5	675
	1.113	674	673.5	673
	1.114	676	677	674.5
	1.115	676	675.5	673
	1.116	672	675.5	672
	1.117	673	669.5	676.5
	1.118	672	674.5	671
	1.119	672	670	673
	1.12	676	677	673
	1.121	673	675.5	675.5
	1.122	672	676.5	671
	1.123	674	672.5	672.5
	1.124	672	674.5	667.5
	1.125	674	673.5	670.5
	1.126	674.5	676	672
	1.127	673	672	670.5
	1.128	674	676	671.5
	1.129	678	676.5	671
	1.13	677	674.5	673
	1.131	670.5	674.5	671.5
	1.132	673.5	673	670
	1.133	669.5	677.5	669.5
	1.134	674	676.5	667.5
	1.135	674.5	673	670
	1.136	674.5	677	670
	1.137	674	671	671
	1.138	677	675	672.5
	1.139	677	672	669.5
	1.14	670.5	672	669.5
	1.141	673	675.5	671
	1.142	672.5	675	671.5
	1.143	676	674.5	669.5
	1.144	674.5	673	670.5
	1.145	672.5	673	669.5
	1.146	673.5	672	671
	1.147	676	673	669.5
	1.148	675	673.5	666
	1.149	674.5	672.5	669.5
	1.15	675	673	669.5
	1.151	673.5	673.5	671.5
	1.152	672.5	676.5	670.5
	1.153	673	674.5	669.5
	1.154	674.5	674.5	672
	1.155	671	671	667.5
	1.156	671	671	668.5
	1.157	672.5	675	670.5
	1.158	673	674	673
	1.159	673	670	670
	1.16	672	675	669.5
	1.161	672.5	674	669.5
	1.162	672.5	671	671.5
	1.163	671.5	670.5	669
	1.164	669.5	669.5	670
	1.165	669	672.5	672
	1.166	671	672	670
	1.167	673.5	670.5	669.5
	1.168	672	671.5	669.5
	1.169	671	669.5	666.5
	1.17	671.5	672	671.5
	1.171	670	677	671.5
	1.172	671	669	671
	1.173	670.5	668.5	668.5
	1.174	671	672	670.5
	1.175	672.5	673	674.5
	1.176	671	671.5	671
	1.177	671	671.5	669
	1.178	671.5	669.5	669.5
	1.179	672	671	668.5
	1.18	669.5	671	669.5
	1.181	673	669.5	672.5
	1.182	669.5	669.5	671.5
	1.183	667	671	669.5
	1.184	669.5	669.5	670.5
	1.185	669.5	672	671
	1.186	669.5	673	669
	1.187	669.5	669.5	670.5
	1.188	671	671	674
	1.189	670.5	675	667.5
	1.19	668.5	670.5	671
	1.191	669.5	668.5	673.5
	1.192	672.5	669	668
	1.193	672.5	670	669
	1.194	673	671	670
	1.195	669	671	671.5
	1.196	670.5	667	671
	1.197	670.5	669.5	670.5
	1.198	668.5	669.5	669.5
	1.199	670	670.5	672.5
	1.2	669.5	667.5	671.5
	1.201	669.5	670.5	670.5
	1.202	669	672	668
	1.203	673	669.5	671.5
	1.204	672	669	673
	1.205	670	670.5	670
	1.206	669.5	673.5	669.5
	1.207	670	672	668.5
	1.208	673	672.5	671
	1.209	669	672.5	669.5
	1.21	668	671	667.5
	1.211	671.5	669.5	672.5
	1.212	669.5	671	670
	1.213	669.5	673.5	669.5
	1.214	669.5	670.5	670.5
	1.215	667	671.5	672.5
	1.216	671	669.5	669.5
	1.217	669.5	673.5	670
	1.218	667.5	673.5	672
	1.219	670.5	672	670.5
	1.22	671.5	674	670.5
	1.221	670.5	671.5	667.5
	1.222	673.5	672	672.5
	1.223	671	668.5	669
	1.224	668.5	673	671.5
	1.225	672	669.5	673.5
	1.226	669	672.5	669
	1.227	673	676	671
	1.228	668.5	672	675
	1.229	666	671.5	674.5
	1.23	672.5	673	672.5
	1.231	670	669.5	674.5
	1.232	671.5	672.5	670.5
	1.233	671	669.5	671
	1.234	672	670.5	671
	1.235	667	674	671.5
	1.236	671.5	675	672.5
	1.237	672	674.5	673
	1.238	669	676	671
	1.239	671	673	672.5
	1.24	673	677	670.5
	1.241	669	676	673.5
	1.242	669.5	671	672
	1.243	670	670	673
	1.244	667	675.5	676
	1.245	668	670.5	676
	1.246	669.5	673	673
	1.247	671.5	675.5	674
	1.248	671	675	675.5
	1.249	670.5	672.5	675.5
	1.25	671	678	674
	1.251	669.5	674	671.5
	1.252	669	672.5	675
	1.253	667.5	674.5	673.5
	1.254	670.5	675	676.5
	1.255	671	673	675
	1.256	669	675	676.5
	1.257	669.5	672	671
	1.258	672.5	675	677
	1.259	669.5	672.5	675
	1.26	670.5	671.5	675
	1.261	673.5	671.5	677
	1.262	672	672.5	676.5
	1.263	669.5	674	677
	1.264	671.5	676.5	673.5
	1.265	669	672	675
	1.266	673.5	674.5	677
	1.267	672.5	677	675
	1.268	671.5	675.5	675
	1.269	669	672	674.5
	1.27	668.5	673.5	674
	1.271	669.5	671.5	677
	1.272	672	672	674.5
	1.273	672.5	673.5	676
	1.274	672	673.5	671
	1.275	669	675	673
	1.276	674	676	677
	1.277	672	674	674
	1.278	673.5	673.5	676
	1.279	671	673.5	675
	1.28	675.5	674.5	674.5
	1.281	675	674	675
	1.282	671.5	674	675
	1.283	675	672	675
	1.284	673	676.5	675.5
	1.285	674	672	674
	1.286	676	670.5	675.5
	1.287	674.5	672.5	673
	1.288	674	674	673.5
	1.289	675	673	671
	1.29	674	673	673
	1.291	676.5	677	677
	1.292	675.5	674	674
	1.293	676	675.5	673
	1.294	677	676.5	671
	1.295	673	672	670.5
	1.296	675.5	669.5	675.5
	1.297	675	673.5	670.5
	1.298	674.5	674	672.5
	1.299	676.5	674.5	673.5
	1.3	676	671.5	674.5
	1.301	674.5	671	672
	1.302	676.5	675.5	670.5
	1.303	675.5	676	673
	1.304	677	676	676.5
	1.305	673.5	676	674.5
	1.306	676	671.5	672
	1.307	678	673	672.5
	1.308	674	673.5	669.5
	1.309	676	676	671
	1.31	673.5	672	673
	1.311	674.5	672.5	670.5
	1.312	675	675.5	672
	1.313	679.5	673.5	672
	1.314	675	669.5	671
	1.315	676.5	673	671.5
	1.316	676.5	671.5	671.5
	1.317	675	671.5	672
	1.318	674.5	677	670.5
	1.319	676.5	676.5	669
	1.32	673	671	671
	1.321	671.5	672.5	671.5
	1.322	672	671.5	674
	1.323	673	675.5	668.5
	1.324	676.5	673	674
	1.325	675.5	675.5	673
	1.326	673	675	670.5
	1.327	675.5	673.5	671.5
	1.328	672.5	675	670
	1.329	672.5	671.5	672
	1.33	671.5	675	672
	1.331	673	673.5	672.5
	1.332	675	674	670.5
	1.333	674	674	666.5
	1.334	674	674.5	669.5
	1.335	670	672	674.5
	1.336	671.5	675	673
	1.337	674	676	670.5
	1.338	674.5	674.5	670
	1.339	672.5	676	674
	1.34	671.5	675	669.5
	1.341	673.5	671.5	668.5
	1.342	672	676	675
	1.343	671	672.5	674.5
	1.344	674	675.5	673
	1.345	674.5	674.5	673.5
	1.346	675	673.5	673.5
	1.347	674	673	673
	1.348	673.5	672	676
	1.349	673	672.5	675
	1.35	670	674.5	670.5
	1.351	671	669.5	673.5
	1.352	674	672	669.5
	1.353	672	674.5	668.5
	1.354	672.5	674.5	670
	1.355	674	672	672
	1.356	666.5	673	672
	1.357	672	675.5	671
	1.358	669.5	675	669.5
	1.359	670.5	677	672.5
	1.36	667	673.5	668.5
	1.361	672.5	676	670.5
	1.362	668.5	674.5	670.5
	1.363	671	672	671.5
	1.364	672	670.5	671.5
	1.365	669.5	673.5	672
	1.366	671	672	674
	1.367	670.5	672.5	670.5
	1.368	670.5	673.5	672.5
	1.369	674	672.5	672.5
	1.37	670.5	671	669.5
	1.371	673.5	672	671.5
	1.372	669.5	673.5	669
	1.373	671.5	671.5	673
	1.374	669	674	674
	1.375	671.5	672.5	677
	1.376	669.5	672.5	676
	1.377	671.5	676.5	672
	1.378	672	669.5	672
	1.379	670	669.5	673.5
	1.38	674.5	671	670.5
	1.381	672	672.5	670.5
	1.382	675	669.5	674
	1.383	674.5	675	674
	1.384	670	669.5	671.5
	1.385	672	676	672
	1.386	672	673	671
	1.387	672.5	673.5	669.5
	1.388	675.5	676	672.5
	1.389	674	672	675.5
	1.39	674	674	673
	1.391	669	671	674.5
	1.392	674.5	671	674.5
	1.393	674.5	672	670.5
	1.394	673.5	675.5	671.5
	1.395	674.5	674	672
	1.396	676.5	674.5	676
	1.397	675	673.5	672
	1.398	674	676	675
	1.399	675.5	673	670.5
	1.4	674.5	671.5	672
	1.401	675	673	673.5
	1.402	673.5	675.5	675.5
	1.403	675	674	672
	1.404	673.5	674	675.5
	1.405	674.5	672	671
	1.406	677	673.5	672
	1.407	674.5	672.5	675
	1.408	673.5	673.5	669.5
	1.409	674.5	674.5	675.5
	1.41	674	673	675
	1.411	675	674	673.5
	1.412	676.5	674	674.5
	1.413	676	673	673
	1.414	674.5	674	671
	1.415	675	676	676.5
	1.416	677	672	673.5
	1.417	677	671.5	676
	1.418	675	674.5	674
	1.419	674.5	672	673
	1.42	677	676	675
	1.421	677	678.5	671
	1.422	676	676	672.5
	1.423	676.5	676	672.5
	1.424	678	677.5	674.5
	1.425	677.5	673	679
	1.426	672.5	673	676
	1.427	675	677	677
	1.428	674.5	677	674
	1.429	675	673	677
	1.43	677	676.5	677
	1.431	676	673	672.5
	1.432	677.5	673.5	676
	1.433	675	674	673.5
	1.434	677.5	671.5	673
	1.435	677.5	674.5	676
	1.436	677	672.5	676
	1.437	677	670.5	677.5
	1.438	676	672.5	674.5
	1.439	676.5	670.5	677.5
	1.44	677	673	674.5
	1.441	674	671.5	676
	1.442	677	674.5	675
	1.443	674.5	668	675
	1.444	674.5	672	674.5
	1.445	674.5	671.5	674.5
	1.446	675	669.5	677.5
	1.447	673	673	675.5
	1.448	673.5	671	673
	1.449	674	672.5	675.5
	1.45	673	669.5	675.5
	1.451	671.5	671.5	675.5
	1.452	674	669	680
	1.453	676	670.5	676.5
	1.454	674	669.5	677
	1.455	675	671.5	676
	1.456	675.5	671	676
	1.457	675.5	672.5	676.5
	1.458	672	670.5	675.5
	1.459	674.5	674	677
	1.46	673	672	676
	1.461	675.5	673.5	674.5
	1.462	672.5	672	677.5
	1.463	671.5	671.5	679
	1.464	674.5	671.5	678.5
	1.465	671	670.5	677.5
	1.466	674	667.5	680.5
	1.467	671.5	672	678.5
	1.468	671	669.5	675
	1.469	671.5	672	673.5
	1.47	675	674.5	676
	1.471	672	673.5	672
	1.472	675	672	674.5
	1.473	673	669.5	676.5
	1.474	676.5	671.5	675.5
	1.475	674	671.5	674
	1.476	672	671	674
	1.477	677	672	676
	1.478	677	674	674.5
	1.479	674	671	677
	1.48	673	669.5	675
	1.481	670.5	669.5	675.5
	1.482	675	670	677
	1.483	675	669.5	675.5
	1.484	679	670.5	675.5
	1.485	675.5	672	675
	1.486	676	673	678
	1.487	676	671	674.5
	1.488	679	672	677
	1.489	677	672.5	675
	1.49	677	669.5	672.5
	1.491	674.5	669.5	673.5
	1.492	675.5	671.5	673
	1.493	677	672.5	674
	1.494	677	671	678.5
	1.495	680	673	675.5
	1.496	676	672	673.5
	1.497	679.5	669.5	674.5
	1.498	678	671.5	676
	1.499	679	669.5	676
	1.5	679.5	670.5	676
	1.501	677	672.5	676.5
	1.502	678	671	675
	1.503	677.5	673	677
	1.504	679.5	668.5	675.5
	1.505	682	671	676.5
	1.506	681	668	677.5
	1.507	680.5	670	677
	1.508	680.5	669.5	674
	1.509	680.5	669.5	672.5
	1.51	680	673	674
	1.511	678.5	676	675.5
	1.512	682.5	666.5	677
	1.513	684	670	679.5
	1.514	680.5	669.5	678
	1.515	683	669.5	675.5
	1.516	678	671.5	673.5
	1.517	684	672.5	673.5
	1.518	682	670.5	672
	1.519	684	672.5	674.5
	1.52	682.5	671.5	674
	1.521	683	673	676.5
	1.522	684	670	673.5
	1.523	681	668.5	675.5
	1.524	684	674	673
	1.525	680.5	672	676.5
	1.526	683.5	668.5	673
	1.527	681.5	670.5	675.5
	1.528	681.5	672	672.5
	1.529	682.5	672	674.5
	1.53	680.5	671.5	675
	1.531	682.5	671	677
	1.532	678	670.5	676
	1.533	682	668	675
	1.534	684	672.5	677
	1.535	680	674.5	677.5
	1.536	681.5	676	677
	1.537	684	672.5	680.5
	1.538	678	669.5	677
	1.539	682.5	672	677
	1.54	680.5	670.5	677
	1.541	681.5	669.5	677
	1.542	682	672	679
	1.543	679.5	671	677
	1.544	678	672.5	676.5
	1.545	680.5	672.5	677.5
	1.546	678	674	677
	1.547	678.5	674.5	677
	1.548	682	669.5	678.5
	1.549	680.5	674.5	674
	1.55	678.5	673	676.5
	1.551	678.5	674.5	678
	1.552	678.5	671	675
	1.553	680	672	677
	1.554	679	671.5	680.5
	1.555	677	672	677
	1.556	677	669.5	677
	1.557	677	671	677.5
	1.558	679.5	673	677.5
	1.559	676	675	676
	1.56	678	672.5	676.5
	1.561	678	670.5	679
	1.562	679	671.5	680
	1.563	680	673	677
	1.564	678	673.5	676
	1.565	679	672	676.5
	1.566	678	676.5	678.5
	1.567	679.5	670.5	675.5
	1.568	679.5	674	677
	1.569	676	673.5	676
	1.57	675.5	675	677
	1.571	678.5	676	674
	1.572	676	675.5	677.5
	1.573	677	678	676
	1.574	676.5	676.5	673
	1.575	675.5	677	675.5
	1.576	677.5	677	677.5
	1.577	674.5	676	677
	1.578	676.5	673.5	675.5
	1.579	676	677	680.5
	1.58	677	678.5	674.5
	1.581	673.5	677	678.5
	1.582	673	675	678
	1.583	675.5	676	677.5
	1.584	676	678.5	676.5
	1.585	676	677.5	675
	1.586	673.5	681.5	677.5
	1.587	673	676	677
	1.588	674.5	675.5	681.5
	1.589	676	676	678
	1.59	677	677.5	681.5
	1.591	675	680	681.5
	1.592	676	678	678
	1.593	674.5	677.5	677
	1.594	676.5	675.5	679.5
	1.595	676	676.5	681.5
	1.596	677	677.5	678.5
	1.597	675	674.5	682.5
	1.598	675	679.5	682
	1.599	677	679.5	679.5
	1.6	677	678	678.5
	1.601	673.5	677	680
	1.602	676.5	682	682
	1.603	678	677	679
	1.604	676	679	680.5
	1.605	677	679	680
	1.606	675	678	681.5
	1.607	675.5	679	678.5
	1.608	672.5	679	679.5
	1.609	675.5	678	675.5
	1.61	674.5	677.5	679
	1.611	676	679	679.5
	1.612	677.5	677.5	677
	1.613	675	679.5	680.5
	1.614	674	677.5	677
	1.615	675	677.5	681
	1.616	677	675.5	677
	1.617	675	677.5	679
	1.618	675	677	677
	1.619	674	672.5	681
	1.62	672	677.5	680.5
	1.621	677	675.5	682
	1.622	678	675.5	679
	1.623	677	677	679
	1.624	675.5	676	679
	1.625	673.5	675	682.5
	1.626	674.5	677	679.5
	1.627	676	677	680
	1.628	673	677	680.5
	1.629	674	678	681.5
	1.63	675	680	681
	1.631	678	678	683
	1.632	675.5	676	678
	1.633	676.5	677	680.5
	1.634	679.5	675.5	679
	1.635	675	677	682
	1.636	677	676.5	678.5
	1.637	677	676	683
	1.638	677	676.5	680
	1.639	675.5	679	682
	1.64	673	675	680
	1.641	673.5	674	678.5
	1.642	675.5	674	680.5
	1.643	672.5	677.5	681.5
	1.644	674.5	674.5	678
	1.645	677	676	681
	1.646	673.5	678	679
	1.647	674	674	677
	1.648	671	676	681
	1.649	674	676	678
	1.65	672	676	679
	1.651	672	678	683
	1.652	671.5	677	677.5
	1.653	672.5	675	679
	1.654	674.5	672	681.5
	1.655	674	676	681.5
	1.656	672	676.5	677.5
	1.657	670.5	675	680.5
	1.658	672	674	676.5
	1.659	669.5	677.5	676
	1.66	669.5	676	675
	1.661	670	675.5	676
	1.662	670.5	674	676
	1.663	671	675	675
	1.664	671.5	676	673.5
	1.665	669.5	677	674.5
	1.666	669.5	675.5	673.5
	1.667	669.5	676	674.5
	1.668	669.5	675.5	675.5
	1.669	673	677	675
	1.67	672.5	676	673.5
	1.671	670.5	677	674
	1.672	672.5	677	675
	1.673	669.5	678	674
	1.674	670.5	673	670.5
	1.675	669	676	671.5
	1.676	671	678.5	672
	1.677	671.5	678	673
	1.678	671.5	674.5	669
	1.679	674.5	676	673
	1.68	669.5	680.5	676
	1.681	671	678	673.5
	1.682	673.5	677	671.5
	1.683	673.5	675.5	674.5
	1.684	669	678	671.5
	1.685	672.5	680	673.5
	1.686	673	681.5	677
	1.687	673	678.5	675
	1.688	669	677	674
	1.689	673	677.5	674
	1.69	671.5	680.5	674
	1.691	671.5	680.5	672.5
	1.692	671	680	672
	1.693	674	681	669.5
	1.694	677.5	678.5	672
	1.695	674	678	669.5
	1.696	676.5	678.5	672.5
	1.697	673	680	670.5
	1.698	677	678.5	671.5
	1.699	677.5	681.5	673.5
	1.7	671	684	672
	1.701	674.5	683.5	671.5
	1.702	674	683	673.5
	1.703	674	683	674.5
	1.704	676	681.5	673
	1.705	672	681.5	675
	1.706	675	679	672.5
	1.707	677	682	673
	1.708	675.5	682.5	675
	1.709	677	681.5	673
	1.71	675.5	684	675.5
	1.711	676	683	675.5
	1.712	674	684	675
	1.713	675	685	676
	1.714	676.5	684	674
	1.715	675	684	677
	1.716	674	680.5	677
	1.717	677	684	675
	1.718	672	683.5	676.5
	1.719	673	683.5	677
	1.72	673.5	684	680.5
	1.721	677	682.5	677
	1.722	673.5	684	678.5
	1.723	673	683.5	678.5
	1.724	674.5	684	680
	1.725	674.5	684	677
	1.726	676.5	684	678
	1.727	676	684	678
	1.728	673	684	681.5
	1.729	669.5	683	682.5
	1.73	674.5	684	677.5
	1.731	671.5	684	677.5
	1.732	671	682.5	679.5
	1.733	676	684	683
	1.734	674.5	685.5	684
	1.735	673	683.5	684
	1.736	671	687	679.5
	1.737	673.5	684	681
	1.738	672	687	684
	1.739	674	684	680
	1.74	671	684	683.5
	1.741	673.5	684	684
	1.742	671.5	688.5	684
	1.743	669.5	684	684
	1.744	671	685.5	682
	1.745	671.5	686	681
	1.746	670.5	686	684
	1.747	669.5	686	683
	1.748	673.5	684	684
	1.749	671.5	687.5	684
	1.75	673	687	684
	1.751	672.5	684	684
	1.752	675.5	683.5	685.5
	1.753	671	683	688
	1.754	675	682	687
	1.755	673	684	689.5
	1.756	674	683.5	687.5
	1.757	674	684	688.5
	1.758	673.5	684	688
	1.759	673.5	687.5	690
	1.76	673.5	688.5	686
	1.761	673	686	688.5
	1.762	676.5	689	688
	1.763	675	685.5	688.5
	1.764	671.5	687.5	684
	1.765	674	684	691
	1.766	674	684	690
	1.767	672.5	686	688
	1.768	675.5	684	690
	1.769	673.5	684	686
	1.77	676.5	688	689
	1.771	677	688	690.5
	1.772	677	684	684
	1.773	673.5	684	684
	1.774	674.5	687.5	690.5
	1.775	679	684	690.5
	1.776	677	688	689.5
	1.777	676.5	685.5	684
	1.778	677	686.5	689
	1.779	678	684	688.5
	1.78	676.5	684	691.5
	1.781	675	688	688
	1.782	675.5	686	693.5
	1.783	675.5	687	689.5
	1.784	677.5	683	690.5
	1.785	675	690	690
	1.786	679	684	688.5
	1.787	677	684	690
	1.788	677	689	694.5
	1.789	679	690	690.5
	1.79	673	684	689
	1.791	678.5	687.5	689
	1.792	676	687.5	689.5
	1.793	677	687	686
	1.794	678.5	687	689
	1.795	676	688.5	688
	1.796	674.5	690.5	687.5
	1.797	678	690.5	688.5
	1.798	676.5	687	690.5
	1.799	676.5	692	688
	1.8	674	684	689
	1.801	676	688.5	689.5
	1.802	674.5	687.5	692.5
	1.803	677	688.5	689.5
	1.804	679	689	688
	1.805	677	686.5	689
	1.806	675	687.5	690
	1.807	675.5	687	687.5
	1.808	677	684	687
	1.809	671	684	689
	1.81	678.5	687.5	690
	1.811	676	687	686.5
	1.812	676.5	682	689
	1.813	676	688	690.5
	1.814	675.5	683.5	686
	1.815	676.5	686	686.5
	1.816	677	683	688
	1.817	674.5	687.5	688.5
	1.818	672.5	682.5	688
	1.819	673.5	684	690
	1.82	673.5	686.5	691.5
	1.821	669.5	683	689
	1.822	674	684	690
	1.823	675.5	684	688.5
	1.824	672.5	684	688.5
	1.825	672.5	686	690.5
	1.826	674	685.5	689.5
	1.827	672	682.5	690
	1.828	673	686	690.5
	1.829	673	689	693
	1.83	673	682.5	684
	1.831	673	685.5	688.5
	1.832	675	684	689
	1.833	672	688.5	684
	1.834	674	684	689.5
	1.835	673.5	684	690.5
	1.836	673	686.5	684
	1.837	669.5	688.5	687
	1.838	670.5	688.5	689
	1.839	671.5	688	690.5
	1.84	667.5	688	689
	1.841	668.5	685.5	688.5
	1.842	673	688.5	689.5
	1.843	671	687.5	690
	1.844	668.5	687	688.5
	1.845	670.5	690	692
	1.846	669.5	687	690
	1.847	667.5	686	688
	1.848	668	687.5	691.5
	1.849	669	687	690.5
	1.85	665	687	690
	1.851	670.5	686.5	687.5
	1.852	669.5	687	684
	1.853	673.5	689.5	688.5
	1.854	668.5	685.5	687
	1.855	667	684	686.5
	1.856	667	690.5	687
	1.857	668	690	689.5
	1.858	665.5	684	686.5
	1.859	665.5	687	686
	1.86	664.5	688.5	684
	1.861	664.5	683.5	685.5
	1.862	669.5	684	683.5
	1.863	667	684	685.5
	1.864	667	689	683
	1.865	667.5	684	684
	1.866	668	687	682.5
	1.867	667.5	684	684
	1.868	663.5	687	684
	1.869	663.5	687.5	683.5
	1.87	664	684	684
	1.871	663	684	684
	1.872	668.5	684	682
	1.873	664.5	682.5	682.5
	1.874	663	684	682
	1.875	665	684	680.5
	1.876	663.5	682.5	684
	1.877	665	684	681
	1.878	663.5	683.5	681.5
	1.879	663.5	679	684
	1.88	663.5	679.5	678
	1.881	663.5	679	680.5
	1.882	663.5	678.5	683
	1.883	663	682	681.5
	1.884	663.5	678	678.5
	1.885	663.5	680.5	677
	1.886	658	678.5	677
	1.887	658.5	677.5	680.5
	1.888	662.5	679.5	680
	1.889	661	673.5	675.5
	1.89	657	669.5	679.5
	1.891	662.5	674	677.5
	1.892	662	674	675
	1.893	663.5	675.5	679.5
	1.894	658.5	675.5	677
	1.895	659	672.5	676.5
	1.896	660	674.5	673
	1.897	658.5	671	675.5
	1.898	654.5	672	675
	1.899	659.5	670.5	678.5
	1.9	654.5	670.5	673
	1.901	657	669	676
	1.902	656.5	672	673
	1.903	653.5	669.5	677
	1.904	654.5	665	673
	1.905	657.5	667.5	673.5
	1.906	652	668	675.5
	1.907	654.5	669.5	672.5
	1.908	653	669	670.5
	1.909	651.5	668	672.5
	1.91	651.5	666.5	672.5
	1.911	649.5	666.5	670.5
	1.912	649.5	667	672.5
	1.913	651	665.5	669.5
	1.914	647	665	672
	1.915	649	661	668
	1.916	649.5	666.5	671
	1.917	646.5	663	667
	1.918	647	666.5	666.5
	1.919	646	657.5	669
	1.92	646	662	667
	1.921	643	661.5	669.5
	1.922	642.5	659.5	667
	1.923	644	660	668.5
	1.924	643	660.5	664.5
	1.925	643	659	668
	1.926	639.5	654.5	665.5
	1.927	638	654.5	664.5
	1.928	641	657	668.5
	1.929	638.5	654.5	664.5
	1.93	639.5	654	669.5
	1.931	638	654.5	665
	1.932	634.5	654.5	665.5
	1.933	636.5	653.5	664.5
	1.934	633.5	652.5	663.5
	1.935	636	651.5	661.5
	1.936	635	651.5	663.5
	1.937	635.5	653	660.5
	1.938	631.5	649.5	659
	1.939	637.5	649.5	662
	1.94	635	650.5	661
	1.941	631	648	662
	1.942	630.5	643.5	659
	1.943	630	644.5	659.5
	1.944	632	643	659
	1.945	631	647.5	656.5
	1.946	632	642.5	657
	1.947	632	644.5	658
	1.948	629	643.5	656.5
	1.949	634	643.5	658
	1.95	629.5	639.5	654.5
	1.951	626.5	643	658
	1.952	632	637.5	659
	1.953	624.5	643	657
	1.954	627.5	639.5	653.5
	1.955	624.5	639.5	653.5
	1.956	628.5	639.5	658
	1.957	624	636.5	654.5
	1.958	627.5	636.5	657
	1.959	623	638	654.5
	1.96	619.5	638	658.5
	1.961	624.5	636	651
	1.962	619.5	633	654.5
	1.963	618.5	635	654.5
	1.964	619	634.5	654.5
	1.965	619	629.5	657.5
	1.966	618	635	654
	1.967	614.5	635	654.5
	1.968	609.5	633	647
	1.969	609.5	629.5	651
	1.97	609	630.5	649.5
	1.971	609.5	631.5	647
	1.972	607	629	651
	1.973	603.5	629	650.5
	1.974	602.5	629	650.5
	1.975	606.5	628.5	650
	1.976	602	626.5	647.5
	1.977	603.5	624.5	650.5
	1.978	600	630.5	647.5
	1.979	601.5	626.5	650.5
	1.98	594.5	622	647.5
	1.981	596	620.5	648
	1.982	595	622	645.5
	1.983	591	621.5	649.5
	1.984	591.5	623	646
	1.985	587	620.5	646
	1.986	590	617	643
	1.987	586.5	621	645
	1.988	585.5	622	646.5
	1.989	584	622.5	647
	1.99	580	617	642.5
	1.991	579	619	644.5
	1.992	577	615	642.5
	1.993	575.5	616.5	638
[truncated: 13,006 more rows]

## Sheet: H
DataTypeVer2.0	Time	Fz	Fz	Fz
NumberOfData		8000	8000	8000
PreTriggerData		0	0	0
SamplingTime[ms]		1	1	1
DataLabel		T1:CMJ	T2:CMJ	T3:CMJ
DataUnit	sec	N	N	N
	0	595.5	599	585
	0.001	595.5	597	588.5
	0.002	598	595	585
	0.003	598	596.5	589
	0.004	597.5	595	588.5
	0.005	597	594	588
	0.006	599	595.5	586
	0.007	596	599	585
	0.008	600	598.5	590
	0.009	595	599	584.5
	0.01	595.5	598.5	583
	0.011	595.5	594.5	584.5
	0.012	600.5	598.5	586.5
	0.013	598	595.5	588
	0.014	597	602.5	586
	0.015	596.5	596	588
	0.016	595	597.5	588
	0.017	595	598	587
	0.018	601	597.5	588.5
	0.019	596.5	596.5	587
	0.02	597	595	586.5
	0.021	601.5	596.5	584
	0.022	598.5	594.5	584
	0.023	595	598	586.5
	0.024	599.5	599	588
	0.025	595.5	597	586.5
	0.026	600	596.5	588.5
	0.027	597.5	595.5	586.5
	0.028	602	592.5	587.5
	0.029	596.5	595	589.5
	0.03	599	592.5	589.5
	0.031	597	595	588
	0.032	595.5	597	588
	0.033	596	595.5	587
	0.034	600	592.5	586
	0.035	599	594.5	590
	0.036	597.5	598	589
	0.037	598.5	595.5	590.5
	0.038	598	594.5	592
	0.039	601.5	595	589.5
	0.04	601.5	593.5	593
	0.041	602	591.5	590
	0.042	599	593	589.5
	0.043	600	595.5	588.5
	0.044	601.5	590	589.5
	0.045	600.5	595.5	590.5
	0.046	597.5	592.5	589.5
	0.047	600	593.5	588
	0.048	597	592.5	594.5
	0.049	599	592	591.5
	0.05	598.5	590.5	590
	0.051	597	590	588
	0.052	601	596.5	589.5
	0.053	597	590.5	592
	0.054	596	590.5	590.5
	0.055	600.5	594	590.5
	0.056	598	590.5	588
	0.057	601.5	589.5	592.5
	0.058	598	592.5	590.5
	0.059	599.5	588	590
	0.06	600.5	591.5	589.5
	0.061	600.5	588	590.5
	0.062	596.5	590	594
	0.063	596	592	588.5
	0.064	598	591.5	592
	0.065	599	588	588.5
	0.066	599	589	590.5
	0.067	604	588	589.5
	0.068	596.5	590.5	590
	0.069	602	585	589.5
	0.07	596	588.5	590.5
	0.071	599.5	588.5	588
	0.072	599	590.5	588
	0.073	600.5	590.5	589
	0.074	599	591.5	588
	0.075	600	590.5	585
	0.076	599.5	588	588
	0.077	601	590	589
	0.078	601.5	592	590.5
	0.079	600	590	590
	0.08	601	592.5	582.5
	0.081	597.5	589	585
	0.082	598.5	590	589.5
	0.083	598	593.5	585.5
	0.084	599.5	589	586.5
	0.085	600	590	585.5
	0.086	600.5	590.5	587
	0.087	599.5	594	586
	0.088	598.5	592.5	587
	0.089	599	589.5	587
	0.09	601.5	590.5	590.5
	0.091	597	590.5	587
	0.092	595.5	592	584.5
	0.093	597.5	592.5	587
	0.094	598.5	597	589.5
	0.095	599	592.5	587.5
	0.096	597	590	585
	0.097	599	595	585.5
	0.098	597.5	595.5	589
	0.099	597.5	592.5	586.5
	0.1	599.5	597.5	587
	0.101	594.5	595	588
	0.102	596.5	594.5	584.5
	0.103	595	596.5	587
	0.104	597.5	595	588
	0.105	598	594	588
	0.106	599	595	588
	0.107	598.5	595	585.5
	0.108	596.5	596	587.5
	0.109	599	597.5	585.5
	0.11	596	598	587.5
	0.111	597	594	590
	0.112	597	595	587
	0.113	599.5	596.5	588
	0.114	595	596	588
	0.115	593	594	588
	0.116	594	595	587
	0.117	594	594.5	589
	0.118	595.5	596.5	588
	0.119	594.5	594.5	589
	0.12	592.5	594	588.5
	0.121	596.5	596.5	589
	0.122	596.5	593.5	587
	0.123	595.5	595	591.5
	0.124	594.5	595	589.5
	0.125	595.5	593.5	588
	0.126	592	595	590.5
	0.127	596	597	590
	0.128	595	594.5	589.5
	0.129	592.5	594.5	590.5
	0.13	593.5	593	591.5
	0.131	595	594	590.5
	0.132	598	592.5	595
	0.133	597	594	590.5
	0.134	595	590.5	589.5
	0.135	597	595.5	593.5
	0.136	595	590	592.5
	0.137	594	595	595
	0.138	594.5	593	591.5
	0.139	598.5	590.5	590.5
	0.14	596	592.5	593
	0.141	596	594	593
	0.142	594.5	595	593.5
	0.143	594	592.5	590.5
	0.144	596	595	594.5
	0.145	590.5	591	596.5
	0.146	597	591.5	594.5
	0.147	598	593	594.5
	0.148	597	592	594.5
	0.149	596	594.5	591
	0.15	597.5	590.5	594
	0.151	595	594	597.5
	0.152	595	588.5	592.5
	0.153	594	593	595
	0.154	594.5	588.5	593.5
	0.155	594.5	595	595.5
	0.156	597	593	594
	0.157	600	595	596.5
	0.158	598	591	592.5
	0.159	593	593	595
	0.16	596.5	592	596.5
	0.161	595	594.5	594
	0.162	592	593.5	595
	0.163	598	589.5	594.5
	0.164	596	592.5	593
	0.165	600	595	594.5
	0.166	595.5	592.5	595.5
	0.167	597	595	596.5
	0.168	596	593.5	596.5
	0.169	597	593.5	595
	0.17	594	593	595
	0.171	595.5	593.5	590.5
	0.172	598	596	594.5
	0.173	597.5	591.5	594
	0.174	597.5	593	593
	0.175	597	595	595
	0.176	597.5	596	594.5
	0.177	595.5	597	594
	0.178	598	594	595.5
	0.179	601.5	594.5	590.5
	0.18	596	596	593
	0.181	595	595	595
	0.182	597	595	592
	0.183	598.5	596	593.5
	0.184	599	597	594
	0.185	595	599	594
	0.186	596	592.5	593
	0.187	599	594	592.5
	0.188	596.5	595	593.5
	0.189	601.5	595	590.5
	0.19	596	598	590.5
	0.191	598	593	590.5
	0.192	594.5	597	591.5
	0.193	597	596	593.5
	0.194	599.5	596	591
	0.195	596.5	596	592.5
	0.196	592.5	593.5	592
	0.197	595.5	598	592.5
	0.198	596.5	597	590.5
	0.199	595	596	588
	0.2	596	596	588.5
	0.201	595.5	593.5	592.5
	0.202	597	595	592
	0.203	599	597.5	590
	0.204	594.5	598	590.5
	0.205	594.5	596.5	592.5
	0.206	598.5	594.5	588
	0.207	593.5	595	588
	0.208	595	594.5	590
	0.209	595.5	596	592
	0.21	595.5	594	588.5
	0.211	595	597	588.5
	0.212	595	594.5	584
	0.213	592.5	594	588
	0.214	592.5	595.5	591.5
	0.215	596.5	596	589
	0.216	593.5	595	587
	0.217	602.5	593	587.5
	0.218	592.5	593.5	589.5
	0.219	595	592.5	590
	0.22	595	594.5	586.5
	0.221	594	598.5	589
	0.222	593	593.5	592.5
	0.223	595	590.5	589
	0.224	596.5	595	590.5
	0.225	595	593	589.5
	0.226	596	595	593
	0.227	591.5	593.5	590.5
	0.228	595	593	590.5
	0.229	594.5	591.5	591.5
	0.23	595	593.5	590.5
	0.231	592.5	595.5	592
	0.232	595	595	588
	0.233	594.5	593.5	587
	0.234	595.5	594.5	590.5
	0.235	596.5	592	589
	0.236	597.5	594.5	590
	0.237	594.5	593	590.5
	0.238	592.5	592	588
	0.239	594.5	594	588.5
	0.24	597	592.5	593
	0.241	594	594.5	588.5
	0.242	597	589.5	590
	0.243	595	594	591.5
	0.244	595.5	589.5	589
	0.245	597	592.5	588
	0.246	597	592.5	590
	0.247	596	592.5	590.5
	0.248	596.5	589.5	592.5
	0.249	595	594	588.5
	0.25	597.5	590.5	592.5
	0.251	597	590.5	594.5
	0.252	596.5	594.5	590.5
	0.253	599	592	592.5
	0.254	597.5	594.5	588
	0.255	599.5	591	589
	0.256	598	594	592.5
	0.257	598	591.5	595
	0.258	595.5	593.5	590.5
	0.259	598.5	593.5	593.5
	0.26	598.5	593	591.5
	0.261	595	596.5	592
	0.262	600	595	593.5
	0.263	600	593	591.5
	0.264	597.5	594.5	589
	0.265	596	592.5	594
	0.266	598.5	593	592
	0.267	601.5	596	593.5
	0.268	598.5	595	593.5
	0.269	599	591.5	594
	0.27	599	595	592
	0.271	598.5	595	593
	0.272	601.5	595	590.5
	0.273	599.5	594.5	590.5
	0.274	600.5	590.5	591.5
	0.275	600.5	589	593.5
	0.276	601	595	594
	0.277	601	594	592.5
	0.278	602	593.5	592
	0.279	600.5	595	594.5
	0.28	604	594	594
	0.281	600.5	596.5	590.5
	0.282	600	594	592.5
	0.283	601.5	599	594
	0.284	599	595	592
	0.285	600	597.5	593
	0.286	605.5	596.5	588
	0.287	601	596.5	592.5
	0.288	600	598.5	594
	0.289	601	594.5	588
	0.29	597.5	600	590.5
	0.291	599.5	596	588.5
	0.292	600.5	598	588.5
	0.293	602	594.5	591.5
	0.294	599	599	588.5
	0.295	601	597	588.5
	0.296	598.5	596	592
	0.297	600.5	599	595
	0.298	599.5	595	592.5
	0.299	600.5	597.5	594.5
	0.3	598	599	592
	0.301	600.5	597	594
	0.302	596.5	596.5	594
	0.303	598.5	599.5	595
	0.304	601.5	598	591.5
	0.305	598	594.5	592.5
	0.306	597	598	590.5
	0.307	600	596	593.5
	0.308	597	598	591
	0.309	601	596.5	590
	0.31	596.5	600	595
	0.311	599	599.5	593.5
	0.312	599.5	599.5	590.5
	0.313	596.5	595.5	590
	0.314	599	597	592
	0.315	596	597	588
	0.316	599	596.5	591.5
	0.317	598	595.5	590.5
	0.318	596	597.5	592.5
	0.319	599	596	591.5
	0.32	595	601	595.5
	0.321	597	599	591.5
	0.322	596.5	599.5	589
	0.323	592.5	597	593.5
	0.324	598.5	597.5	595
	0.325	595	598	590.5
	0.326	598	599.5	593
	0.327	596	599.5	590
	0.328	594.5	597.5	594
	0.329	595.5	594.5	593.5
	0.33	599	598	593.5
	0.331	595.5	595	593.5
	0.332	594	596	590.5
	0.333	595	598	595
	0.334	594	594.5	593.5
	0.335	594	596	595
	0.336	598	595.5	592.5
	0.337	595	595.5	594.5
	0.338	596	594	590.5
	0.339	593	597.5	592.5
	0.34	594	597	588.5
	0.341	597	599	593
	0.342	594.5	594	593.5
	0.343	595	595	593.5
	0.344	597.5	595.5	594
	0.345	594	598	594.5
	0.346	595	594	593.5
	0.347	593.5	594	590.5
	0.348	594	595	593.5
	0.349	595	594	595
	0.35	596.5	594	593
	0.351	596.5	595	588.5
	0.352	595.5	594	593
	0.353	597.5	592.5	592.5
	0.354	596	594.5	590.5
	0.355	595.5	597.5	590.5
	0.356	595.5	592	591.5
	0.357	595.5	591.5	590
	0.358	600	594	591.5
	0.359	597.5	596.5	593.5
	0.36	598.5	592	593.5
	0.361	595.5	591.5	588
	0.362	596	591.5	589
	0.363	600	592.5	588.5
	0.364	597.5	594	593.5
	0.365	597	595	590.5
	0.366	598	592	589.5
	0.367	597	592	588.5
	0.368	597.5	592	590.5
	0.369	598.5	594	586.5
	0.37	600.5	595	587
	0.371	595.5	590.5	588.5
	0.372	598	594	588
	0.373	595	592.5	585
	0.374	596	594.5	588
	0.375	599	593	589.5
	0.376	600	593	584
	0.377	596	592.5	589.5
	0.378	597	595	588
	0.379	599.5	588.5	588
	0.38	599	594	588
	0.381	597	591.5	585
	0.382	600	591.5	584.5
	0.383	595.5	590	587.5
	0.384	599.5	593.5	589
	0.385	596.5	592	581
	0.386	595	590.5	585
	0.387	600	589	586.5
	0.388	597	595	581.5
	0.389	599.5	588.5	587
	0.39	596	589.5	584.5
	0.391	597.5	590	586
	0.392	598	591.5	583
	0.393	597.5	589.5	582
	0.394	596.5	592	586
	0.395	598	590.5	583
	0.396	595	590	585.5
	0.397	599	588	582
	0.398	596	590	582.5
	0.399	595	588	583
	0.4	600	593	581
	0.401	597.5	590	584
	0.402	598	592.5	582.5
	0.403	596.5	591	585
	0.404	597	590.5	586.5
	0.405	598	589	584
	0.406	596.5	593	582.5
	0.407	598	592.5	584.5
	0.408	599	593.5	585.5
	0.409	595.5	593.5	583
	0.41	595	592.5	584
	0.411	597.5	595	585.5
	0.412	597	588.5	584.5
	0.413	594	594.5	584.5
	0.414	598	594.5	581.5
	0.415	595.5	588	583
	0.416	597.5	588	584
	0.417	596.5	594	583.5
	0.418	594	592	585
	0.419	596.5	592.5	586.5
	0.42	599.5	593.5	585.5
	0.421	596	595.5	585.5
	0.422	594.5	593.5	584
	0.423	594	592	586.5
	0.424	597	591.5	585
	0.425	594	593	589.5
	0.426	599.5	592.5	588.5
	0.427	595	592.5	586.5
	0.428	598	595.5	585
	0.429	596	595	590.5
	0.43	597	595	588
	0.431	595.5	593.5	588.5
	0.432	596	595	587.5
	0.433	597.5	595	588
	0.434	597	596	585.5
	0.435	597	594	590
	0.436	595	595.5	588.5
	0.437	595	591.5	588.5
	0.438	597	595	590.5
	0.439	596	596	590
	0.44	598	593.5	590
	0.441	594.5	593	589.5
	0.442	596.5	593.5	588
	0.443	595.5	593	589
	0.444	597	593.5	592
	0.445	596	595	593
	0.446	599.5	595	590
	0.447	597.5	598	595
	0.448	598	596	588
	0.449	598	598	592
	0.45	599	594	590.5
	0.451	596.5	593	592.5
	0.452	597.5	595.5	591
	0.453	595.5	597	594
	0.454	599	596	594
	0.455	596.5	596	595
	0.456	599	593.5	592.5
	0.457	602.5	595.5	597.5
	0.458	599.5	596.5	596
	0.459	601	593	590.5
	0.46	600	591	595
	0.461	601.5	594.5	597.5
	0.462	601.5	590	592.5
	0.463	601	594.5	594.5
	0.464	600.5	594.5	595.5
	0.465	602.5	594	597
	0.466	601.5	591.5	594
	0.467	599.5	594	595.5
	0.468	600	595	597
	0.469	600	592	596.5
	0.47	598	591.5	595
	0.471	600	592	595
	0.472	599	590.5	594.5
	0.473	601	595	599.5
	0.474	602.5	591.5	595
	0.475	602	590.5	598
	0.476	602.5	594	596
	0.477	600	590.5	598.5
	0.478	601	592.5	595.5
	0.479	600.5	590.5	595
	0.48	601	593	596
	0.481	602	594.5	595
	0.482	603.5	590.5	596
	0.483	597	591.5	595
	0.484	598.5	594	597
	0.485	600	592	593
	0.486	599.5	590.5	594.5
	0.487	600	590	596
	0.488	597	590.5	597.5
	0.489	599	590	593
	0.49	599	590	597
	0.491	601.5	588.5	600.5
	0.492	601	593	598
	0.493	599	588.5	596
	0.494	599	588	594.5
	0.495	603	588.5	592
	0.496	601.5	588	594.5
	0.497	597	592	594.5
	0.498	597	590.5	594.5
	0.499	601.5	590.5	595.5
	0.5	596	589.5	595
	0.501	600.5	592	598
	0.502	597	589	595.5
	0.503	599.5	590.5	592
	0.504	599	589.5	595.5
	0.505	600.5	591.5	594.5
	0.506	599	587	595
	0.507	599	592.5	593
	0.508	597.5	591	592
	0.509	602	593.5	593
	0.51	593.5	590	592.5
	0.511	598	588	591.5
	0.512	595.5	590.5	590
	0.513	595	587.5	590
	0.514	601	590.5	590.5
	0.515	598	589	589
	0.516	594.5	589	588
	0.517	598.5	589	592
	0.518	598	592	589
	0.519	595	591.5	587
	0.52	592.5	588.5	592
	0.521	591.5	592.5	589
	0.522	598.5	593.5	589.5
	0.523	592	592	588.5
	0.524	595.5	592	587
	0.525	596.5	593.5	589.5
	0.526	597.5	590.5	590.5
	0.527	595	597	591.5
	0.528	593.5	594	587
	0.529	596.5	592	590.5
	0.53	593.5	593.5	588
	0.531	594	595.5	588
	0.532	592.5	596	586.5
	0.533	593.5	593.5	589.5
	0.534	596.5	595.5	588.5
	0.535	593	595	584.5
	0.536	592	597	587.5
	0.537	592	597	588
	0.538	595	595	588
	0.539	595	595.5	586.5
	0.54	596.5	597.5	588.5
	0.541	595	597.5	588.5
	0.542	591.5	597	587.5
	0.543	591.5	597.5	586.5
	0.544	594	595	585.5
	0.545	597	595.5	583
	0.546	595	597	589.5
	0.547	598.5	595.5	589
	0.548	595	596	584
	0.549	593.5	594.5	586
	0.55	596.5	601	585
	0.551	594	601.5	587
	0.552	595.5	599	587.5
	0.553	597	598.5	587
	0.554	595.5	598	587
	0.555	593	594	588
	0.556	594.5	597.5	588
	0.557	598	597	586
	0.558	597	595.5	585
	0.559	595	598	587.5
	0.56	598	597.5	588
	0.561	596.5	596	588
	0.562	594.5	600.5	588
	0.563	599.5	598	586
	0.564	597.5	599.5	589.5
	0.565	596.5	597	588
	0.566	594.5	597	590.5
	0.567	596	596.5	588
	0.568	597.5	599.5	589
	0.569	593.5	596	589
	0.57	596	597	589
	0.571	596.5	596	590.5
	0.572	595	594	589
	0.573	596.5	595	590.5
	0.574	594.5	595	591.5
	0.575	595.5	595	593
	0.576	599	594.5	588
	0.577	597	597	589.5
	0.578	596.5	594.5	590.5
	0.579	596.5	596.5	592
	0.58	595.5	595	591.5
	0.581	596	595	592
	0.582	595	592	592
	0.583	599	594	592.5
	0.584	600.5	597.5	588
	0.585	596	592.5	589.5
	0.586	595	594	588.5
	0.587	595.5	590	590
	0.588	596.5	591.5	590.5
	0.589	596	593	593.5
	0.59	596.5	594.5	590
	0.591	597	592	594
	0.592	600.5	595.5	590.5
	0.593	596.5	589.5	592.5
	0.594	598	588.5	592
	0.595	598.5	590.5	590.5
	0.596	598.5	594.5	594.5
	0.597	598	595	593
	0.598	598	594.5	596
	0.599	599	592	592.5
	0.6	597.5	590.5	591
	0.601	598.5	592.5	592
	0.602	597	593	590.5
	0.603	600.5	590	588.5
	0.604	598	594	589.5
	0.605	597.5	588.5	589.5
	0.606	599	592	588.5
	0.607	599	589.5	593
	0.608	600.5	592	593.5
	0.609	600	594	591.5
	0.61	598.5	590.5	593.5
	0.611	598	586.5	590.5
	0.612	600.5	590.5	590.5
	0.613	597.5	591	590
	0.614	602.5	591.5	588.5
	0.615	597	590.5	592
	0.616	599.5	595	590.5
	0.617	596	590.5	591.5
	0.618	601.5	592.5	589.5
	0.619	600	592.5	590.5
	0.62	598	592.5	588
	0.621	596.5	594	589.5
	0.622	600.5	592.5	588
	0.623	602	590.5	590
	0.624	594.5	595.5	590.5
	0.625	601.5	595.5	587
	0.626	597	592.5	590
	0.627	599.5	592.5	588
	0.628	600	590.5	587
	0.629	600	593.5	592
	0.63	603	594.5	589
	0.631	601.5	594.5	590.5
	0.632	599	595	592
	0.633	600	592	586
	0.634	597	594	588.5
	0.635	596	597	588
	0.636	597.5	591.5	586.5
	0.637	598	594.5	589.5
	0.638	596.5	596	588.5
	0.639	600	595.5	594
	0.64	595.5	598	591.5
	0.641	598.5	594	588
	0.642	597	595	589.5
	0.643	596.5	592.5	592
	0.644	597	592.5	594
	0.645	595	593.5	587
	0.646	597.5	595	588.5
	0.647	595	597	588
	0.648	597.5	598	590
	0.649	599	592.5	590.5
	0.65	595	594.5	589.5
	0.651	597	593.5	590.5
	0.652	598.5	595.5	590.5
	0.653	599.5	598.5	590
	0.654	598.5	590	590
	0.655	594.5	597.5	587.5
	0.656	597	595	593
	0.657	600.5	595.5	592
	0.658	596	598	588.5
	0.659	598	596	592.5
	0.66	596	597.5	592.5
	0.661	598	595	590.5
	0.662	596	597	594
	0.663	597.5	595	594
	0.664	599	596	595
	0.665	595	593.5	592.5
	0.666	596	597.5	592.5
	0.667	597	594.5	595
	0.668	599	594.5	590.5
	0.669	600	593.5	592
	0.67	595.5	595.5	594
	0.671	598.5	596	595.5
	0.672	596	597	593.5
	0.673	599	593	595
	0.674	597	594	596.5
	0.675	599	597	597
	0.676	598	595	594.5
	0.677	595	590	598.5
	0.678	598	591	594
	0.679	595	594	595
	0.68	597	595	598
	0.681	595.5	591.5	597
	0.682	596	595	595
	0.683	602	593	597
	0.684	596.5	592.5	594.5
	0.685	599	592	595
	0.686	596.5	596	595.5
	0.687	596.5	598	599
	0.688	598	594.5	597.5
	0.689	596	591	593.5
	0.69	597	595	597
	0.691	600.5	595	597.5
	0.692	596.5	592.5	598
	0.693	598	594.5	596
	0.694	597.5	592.5	594.5
	0.695	595	593.5	595
	0.696	596	594	599
	0.697	595.5	594	595
	0.698	595.5	593.5	597.5
	0.699	594.5	592	594.5
	0.7	597.5	591.5	595
	0.701	595.5	593.5	596.5
	0.702	595	595	595
	0.703	594.5	595	594.5
	0.704	594.5	592.5	592.5
	0.705	595.5	594.5	596.5
	0.706	599.5	590	594
	0.707	597	595	595
	0.708	596	590.5	594
	0.709	601.5	595	594
	0.71	595	594.5	588.5
	0.711	597	590.5	595.5
	0.712	595	594	595
	0.713	595	595	592
	0.714	595	593.5	593.5
	0.715	596	592	593
	0.716	593.5	593	594.5
	0.717	597	595	590.5
	0.718	600	594	594.5
	0.719	596	595.5	590.5
	0.72	593.5	592.5	588
	0.721	599	596	592
	0.722	598.5	590.5	592.5
	0.723	597	592.5	592.5
	0.724	595	593	589
	0.725	592	595.5	588.5
	0.726	596.5	595	588.5
	0.727	598	594	589
	0.728	595	597.5	586
	0.729	598	597	587.5
	0.73	595.5	595	588
	0.731	592.5	595.5	584.5
	0.732	595	593	588
	0.733	599	593.5	586
	0.734	594.5	594.5	587
	0.735	596	594.5	587
	0.736	592.5	597	588.5
	0.737	595.5	592.5	587.5
	0.738	595	592	586
	0.739	596.5	595	583.5
	0.74	595	597	586
	0.741	595	594.5	582
	0.742	594	596	581
	0.743	596	598	584.5
	0.744	596.5	594.5	584.5
	0.745	596.5	597.5	584.5
	0.746	595	597.5	586
	0.747	595	593	587.5
	0.748	598	594	581
	0.749	595	597.5	583
	0.75	595	597.5	588
	0.751	597	596	587
	0.752	595	596	582
	0.753	596.5	597.5	585
	0.754	595.5	598	581.5
	0.755	594.5	595	584.5
	0.756	592	594.5	579
	0.757	597.5	597	586.5
	0.758	595.5	597.5	585
	0.759	595.5	598.5	584.5
	0.76	596.5	595	587.5
	0.761	596	594.5	585.5
	0.762	593.5	594.5	584
	0.763	593.5	595	582
	0.764	597.5	595	584
	0.765	598.5	597.5	587.5
	0.766	595	592	587
	0.767	597	598.5	584.5
	0.768	593	594	587
	0.769	600	594.5	583
	0.77	595	599.5	583.5
	0.771	594.5	593.5	587
	0.772	595	594.5	585.5
	0.773	598	594.5	588.5
	0.774	592	595.5	587
	0.775	597	591.5	586
	0.776	596	595	588
	0.777	596.5	595	586
	0.778	597	595	589
	0.779	597.5	595.5	590.5
	0.78	596	594	584.5
	0.781	596	594.5	587
	0.782	595.5	592	588.5
	0.783	596.5	596	588
	0.784	597.5	595	588
	0.785	593.5	592.5	590
	0.786	595.5	590.5	590.5
	0.787	598	594	589.5
	0.788	596	595	585.5
	0.789	595.5	595	589.5
	0.79	598	593.5	592
	0.791	595	595	589.5
	0.792	601	593	586.5
	0.793	601.5	589.5	588
	0.794	599.5	590	592
	0.795	597	593.5	588
	0.796	599	590.5	589
	0.797	597.5	593	587.5
	0.798	602	591.5	588
	0.799	601	593	587.5
	0.8	599	589.5	590
	0.801	598.5	592	588.5
	0.802	600	592.5	589
	0.803	598	592	585.5
	0.804	595.5	588	590
	0.805	597	593.5	588.5
	0.806	600	592.5	587.5
	0.807	599	594.5	584.5
	0.808	596	592.5	588
	0.809	599	590	586
	0.81	595	592.5	588.5
	0.811	601.5	589	588
	0.812	599.5	590.5	593
	0.813	596	588	588.5
	0.814	604	592	585
	0.815	597.5	588	590.5
	0.816	597	590.5	590.5
	0.817	599.5	589	590.5
	0.818	597.5	595	592
	0.819	601	589	586
	0.82	598.5	590.5	588.5
	0.821	597.5	588	588
	0.822	600	588.5	590
	0.823	598	588.5	588
	0.824	595	590	587.5
	0.825	599	588.5	589
	0.826	600	591.5	588.5
	0.827	600	590.5	588.5
	0.828	597.5	590.5	590
	0.829	599.5	593	590.5
	0.83	599.5	593.5	589
	0.831	596	590	588
	0.832	595	593	592.5
	0.833	601.5	593.5	589.5
	0.834	595.5	591.5	586.5
	0.835	595	594.5	588
	0.836	599.5	594	587
	0.837	597.5	594	590.5
	0.838	596	590.5	590.5
	0.839	599	595	592.5
	0.84	596	592.5	592
	0.841	596	588.5	594.5
	0.842	598.5	592.5	588.5
	0.843	595	592	595
	0.844	594.5	595	587
	0.845	596.5	592.5	593.5
	0.846	598.5	595	593.5
	0.847	596.5	592	592
	0.848	596.5	595	594.5
	0.849	596.5	598	590.5
	0.85	596	594	594
	0.851	596.5	592.5	590.5
	0.852	596	595	590
	0.853	593.5	597	594.5
	0.854	596	595.5	593.5
	0.855	595.5	595	590
	0.856	598	595	593
	0.857	596	594.5	594
	0.858	597	595.5	590.5
	0.859	597	592.5	596
	0.86	597	594	594
	0.861	596	596	595
	0.862	594	596	594
	0.863	598	595.5	590.5
	0.864	595.5	594	595
	0.865	594.5	593	592
	0.866	595	592.5	590.5
	0.867	595	594.5	592.5
	0.868	597	595	592.5
	0.869	597	594.5	591.5
	0.87	595	595	595
	0.871	596.5	592.5	597.5
	0.872	596	595.5	593
	0.873	594.5	595	593.5
	0.874	598.5	590.5	594
	0.875	595.5	593.5	595
	0.876	596	597.5	595.5
	0.877	599.5	588.5	595
	0.878	596.5	594	596.5
	0.879	596	595	594.5
	0.88	598	590.5	591.5
	0.881	595	594.5	594.5
	0.882	597.5	593	595.5
	0.883	597	593.5	595.5
	0.884	597.5	592.5	595
	0.885	596.5	590.5	594
	0.886	596	590.5	595
	0.887	598	591.5	594
	0.888	600	596.5	595
	0.889	599.5	595.5	595
	0.89	597	593	596
	0.891	601.5	592.5	590
	0.892	597.5	592.5	592
	0.893	598.5	593.5	596
	0.894	597.5	592	593.5
	0.895	602	592.5	590.5
	0.896	596.5	595.5	592.5
	0.897	597.5	592.5	590.5
	0.898	599.5	590.5	592.5
	0.899	601	595	593.5
	0.9	599.5	593	595
	0.901	596.5	593.5	593
	0.902	601	595.5	594
	0.903	601	595	592.5
	0.904	597.5	594.5	593.5
	0.905	598	593.5	590
	0.906	602	595.5	594.5
	0.907	599.5	593	589
	0.908	597.5	595	591
	0.909	597.5	593	593
	0.91	597	596	589
	0.911	599.5	594.5	596
	0.912	598.5	594.5	593
	0.913	597	597.5	591.5
	0.914	594.5	595	590.5
	0.915	599	592.5	593.5
	0.916	600.5	595	589
	0.917	594	592.5	586
	0.918	599.5	592.5	588.5
	0.919	596.5	594	592.5
	0.92	596.5	592.5	588.5
	0.921	595.5	592.5	594.5
	0.922	595.5	590.5	590.5
	0.923	599.5	595	589
	0.924	593	595	588.5
	0.925	598	596	590
	0.926	594	596	590
	0.927	597	594.5	593
	0.928	596.5	592	594.5
	0.929	596.5	596	586
	0.93	597.5	594	589.5
	0.931	595	595	588
	0.932	590.5	597	589.5
	0.933	594.5	593.5	587.5
	0.934	596	600	588.5
	0.935	595	595	589
	0.936	596	595	587
	0.937	596	595.5	588
	0.938	595.5	596.5	588.5
	0.939	595	597	590
	0.94	595	598.5	586.5
	0.941	592	596	585.5
	0.942	595	598	586
	0.943	591.5	596.5	586.5
	0.944	595	591.5	586
	0.945	595	595	586
	0.946	590.5	596.5	586.5
	0.947	594	595.5	586
	0.948	594	594.5	586
	0.949	592	597.5	589
	0.95	594.5	595	587.5
	0.951	595.5	593.5	587.5
	0.952	594.5	595.5	590
	0.953	596.5	598.5	588
	0.954	596	598	588
	0.955	596.5	597	586.5
	0.956	595	597.5	590.5
	0.957	594.5	596	586
	0.958	595	596	586.5
	0.959	593	597	587
	0.96	595.5	601.5	587
	0.961	596	599	589
	0.962	596.5	599	588
	0.963	595.5	594.5	590.5
	0.964	596.5	597.5	588.5
	0.965	599.5	597	587.5
	0.966	592.5	596	588
	0.967	598	598	587
	0.968	595.5	596.5	590
	0.969	595	599.5	589
	0.97	598	594.5	587.5
	0.971	597.5	595.5	587.5
	0.972	597.5	596.5	587
	0.973	593	593.5	586.5
	0.974	598	595	589
	0.975	600	594	588
	0.976	600	596.5	585.5
	0.977	597	598.5	585.5
	0.978	597.5	596	590.5
	0.979	599.5	596	586.5
	0.98	600	593	589
	0.981	600	595	588
	0.982	599.5	595	589
	0.983	597.5	596	590.5
	0.984	600.5	599	587.5
	0.985	599.5	594.5	587
	0.986	598.5	592.5	588.5
	0.987	600	595	588.5
	0.988	599.5	596	590
	0.989	598	593	589
	0.99	598	593	590
	0.991	601.5	593	588
	0.992	599.5	594.5	588
	0.993	597.5	593	590
	0.994	597.5	594.5	588.5
	0.995	602	594.5	590.5
	0.996	600.5	596	590.5
	0.997	600	592.5	588.5
	0.998	598	593.5	589
	0.999	601.5	597	590.5
	1	600	596.5	590.5
	1.001	600	595	590.5
	1.002	600.5	592.5	589
	1.003	601	595	593.5
	1.004	601.5	591.5	590
	1.005	601.5	592	589.5
	1.006	605	590	588.5
	1.007	597	594.5	588.5
	1.008	602	593	590.5
	1.009	599.5	592.5	589.5
	1.01	599.5	595	590.5
	1.011	601.5	595	589.5
	1.012	598	591.5	593
	1.013	601	592.5	590.5
	1.014	601.5	593	593.5
	1.015	603.5	595	589
	1.016	602.5	590.5	587.5
	1.017	602	593	588
	1.018	600.5	593	590
	1.019	600	590.5	588
	1.02	598	593	592.5
	1.021	602	590.5	589.5
	1.022	603.5	592	590.5
	1.023	601	593	594
	1.024	601.5	592.5	592.5
	1.025	602	595.5	592.5
	1.026	598	596	592.5
	1.027	598	590	594.5
	1.028	599	594.5	592
	1.029	600	594.5	593
	1.03	596.5	593	594
	1.031	598	591.5	594.5
	1.032	597.5	592	588
	1.033	598	590.5	590.5
	1.034	596	591.5	593.5
	1.035	596.5	596	592.5
	1.036	598.5	590.5	594.5
	1.037	598.5	590	588.5
	1.038	597	594	591
	1.039	599.5	592.5	592
	1.04	596.5	592.5	586.5
	1.041	596	592.5	590.5
	1.042	596.5	594.5	593
	1.043	593.5	596	590
	1.044	596.5	590	589
	1.045	593	594	591.5
	1.046	597.5	590	590.5
	1.047	597	591	592.5
	1.048	596	593	588
	1.049	599	595.5	588
	1.05	590	591.5	590.5
	1.051	591.5	594	588.5
	1.052	595	594.5	597
	1.053	592.5	597	588
	1.054	597.5	593.5	590
	1.055	594.5	595.5	590.5
	1.056	594	596	589.5
	1.057	589	596.5	591.5
	1.058	593.5	595	592.5
	1.059	594.5	592	590.5
	1.06	591.5	597.5	594
	1.061	593.5	596	590.5
	1.062	593.5	596	594
	1.063	593.5	594.5	594.5
	1.064	594	595	590.5
	1.065	595.5	593	590
	1.066	594	597	592.5
	1.067	589	597.5	592
	1.068	590	594.5	591.5
	1.069	590.5	595	591.5
	1.07	592.5	595	594.5
	1.071	592	594.5	594
	1.072	592	596	593
	1.073	590.5	595	590.5
	1.074	593	594.5	595.5
	1.075	591.5	597	590.5
	1.076	594	596.5	591.5
	1.077	592	598	592
	1.078	595	597.5	592.5
	1.079	597	596.5	592.5
	1.08	595	595	590.5
	1.081	594	598	592
	1.082	593.5	592.5	592.5
	1.083	590	597	588
	1.084	593.5	594	590
	1.085	594.5	600	590
	1.086	592.5	597	595
	1.087	594.5	595.5	593
	1.088	591.5	598.5	588
	1.089	594	596	592
	1.09	590.5	594.5	590.5
	1.091	597	595	591
	1.092	592	594	587.5
	1.093	593	594	588.5
	1.094	596	594.5	589
	1.095	595	594.5	588.5
	1.096	594	597	588
	1.097	596	595	588.5
	1.098	595	595.5	590
	1.099	592	596	590
	1.1	595	593	590.5
	1.101	596	594.5	587
	1.102	596.5	595	590.5
	1.103	597.5	592.5	592
	1.104	595	595	588.5
	1.105	593	595	588
	1.106	598.5	594	585.5
	1.107	598	594.5	588
	1.108	593.5	591	586.5
	1.109	595	591.5	584.5
	1.11	595.5	594	585.5
	1.111	595.5	594.5	588
	1.112	600	592	584
	1.113	600.5	593	584.5
	1.114	598	590.5	585
	1.115	597.5	592.5	584.5
	1.116	599	590.5	582
	1.117	596.5	592	582
	1.118	599	592.5	586.5
	1.119	601.5	592.5	584
	1.12	597.5	587	584
	1.121	595	590.5	587.5
	1.122	594.5	592.5	575.5
	1.123	594.5	590.5	583
	1.124	596.5	590.5	582
	1.125	596.5	595	585.5
	1.126	597	595.5	582.5
	1.127	600	590	583
	1.128	598.5	590	585
	1.129	596.5	590.5	585
	1.13	597	592.5	585
	1.131	599	592	583.5
	1.132	599.5	592.5	584
	1.133	595	592.5	580
	1.134	597.5	589	582.5
	1.135	598	594	584
	1.136	597	588.5	584.5
	1.137	599	593.5	584
	1.138	598	593.5	586
	1.139	593.5	589.5	587.5
	1.14	597	593	584
	1.141	596.5	590.5	586.5
	1.142	592.5	594	588
	1.143	598.5	590	584.5
	1.144	595	593	585.5
	1.145	595	593.5	588.5
	1.146	597.5	592.5	586
	1.147	599	592	588
	1.148	597	590	587
	1.149	598	596	585
	1.15	593.5	592	585.5
	1.151	595.5	591.5	586
	1.152	595.5	590.5	587.5
	1.153	596	594.5	586.5
	1.154	600.5	597.5	586.5
	1.155	599.5	599	587.5
	1.156	595.5	596	588
	1.157	597.5	598.5	587
	1.158	595	595	588
	1.159	595	595	587.5
	1.16	595	593.5	590
	1.161	594	595.5	588.5
	1.162	595.5	596.5	589.5
	1.163	597.5	594.5	588.5
	1.164	598	592.5	588
	1.165	596.5	594.5	588
	1.166	597	598	588.5
	1.167	599.5	596.5	590
	1.168	598.5	596	587.5
	1.169	597	596.5	588
	1.17	598	599	590.5
	1.171	598	598.5	589
	1.172	597.5	599	588
	1.173	601.5	595	588
	1.174	595.5	598	590.5
	1.175	596	600	590
	1.176	599.5	596	590.5
	1.177	601	593.5	590
	1.178	602.5	597	590.5
	1.179	597.5	594.5	590.5
	1.18	599	600	590.5
	1.181	601	595	590
	1.182	597.5	597	590.5
	1.183	599	596	591.5
	1.184	600	596	590
	1.185	598	593	592
	1.186	600.5	595	593
	1.187	595	595	589.5
	1.188	599.5	595	595
	1.189	600.5	596.5	590
	1.19	596.5	595	594.5
	1.191	601	595	593
	1.192	599.5	594	589.5
	1.193	598	593	593
	1.194	599	593	594.5
	1.195	602	594	589.5
	1.196	601.5	594.5	590.5
	1.197	599.5	592	592.5
	1.198	600.5	598	593
	1.199	598.5	595.5	592.5
	1.2	603.5	595	590.5
	1.201	601.5	594	590
	1.202	601	593.5	592
	1.203	597.5	596.5	592.5
	1.204	601.5	594	592
	1.205	597	594	590
	1.206	607	590.5	589
	1.207	597	590.5	588.5
	1.208	601.5	593.5	593
	1.209	602.5	596.5	593.5
	1.21	600	590.5	587
	1.211	598	595.5	590.5
	1.212	596	593.5	590.5
	1.213	600	592.5	593
	1.214	597.5	590	592.5
	1.215	599.5	592	587
	1.216	597	594	594
	1.217	599.5	587.5	588
	1.218	603	592	589
	1.219	599	593.5	592.5
	1.22	599	590.5	595
	1.221	602.5	588.5	592.5
	1.222	596.5	588.5	590.5
	1.223	597.5	590.5	594
	1.224	601.5	592.5	592.5
	1.225	598	589.5	589.5
	1.226	602	591	593.5
	1.227	596.5	590.5	589.5
	1.228	599.5	590	593
	1.229	600.5	589.5	592.5
	1.23	594.5	592	590
	1.231	597.5	589	587
	1.232	596.5	593.5	592.5
	1.233	598	589	592
	1.234	598.5	589	588.5
	1.235	595.5	590.5	593
	1.236	601	593	593.5
	1.237	596	588	591
	1.238	597	593	593
	1.239	596	590.5	590
	1.24	594.5	593	592
	1.241	594	593	594
	1.242	598	590.5	595
	1.243	595	589.5	595
	1.244	598	590.5	592.5
	1.245	598	591.5	593
	1.246	595	592.5	590.5
	1.247	596.5	590.5	591.5
	1.248	597	589.5	595
	1.249	595	596.5	591
	1.25	594	590.5	591.5
	1.251	595	596	590.5
	1.252	598	595.5	591.5
	1.253	593	590	590.5
	1.254	597	592	590
	1.255	596	595	590.5
	1.256	595	594	594.5
	1.257	600	593.5	591.5
	1.258	598	596	594
	1.259	598	594.5	591.5
	1.26	598	594	593.5
	1.261	595	593.5	592
	1.262	599	596	592.5
	1.263	597	595.5	593
	1.264	598	595	592
	1.265	596	595	594
	1.266	597	591.5	590.5
	1.267	597.5	592	593
	1.268	599	595	595
	1.269	600.5	595.5	594.5
	1.27	597.5	597	592
	1.271	599.5	597	593
	1.272	599	593.5	593.5
	1.273	597.5	594.5	592.5
	1.274	599	593.5	592
	1.275	600	592	596.5
	1.276	600.5	594.5	593
	1.277	596	593.5	593
	1.278	597.5	594.5	594
	1.279	601.5	596.5	593.5
	1.28	594.5	600	595
	1.281	598.5	598.5	593
	1.282	600	599.5	595
	1.283	601	598	596
	1.284	599.5	594.5	593.5
	1.285	597.5	594.5	593.5
	1.286	597	595	591
	1.287	596.5	596.5	595
	1.288	600	595	589.5
	1.289	600	597.5	592
	1.29	599	598	592.5
	1.291	599.5	596.5	592.5
	1.292	599.5	597	593.5
	1.293	595.5	597	590.5
	1.294	596	599.5	592
	1.295	596	595.5	590
	1.296	597.5	598.5	590.5
	1.297	595.5	597	589.5
	1.298	599	597.5	590.5
	1.299	595.5	597	588
	1.3	597.5	596.5	590.5
	1.301	594	600	588
	1.302	595.5	599	590.5
	1.303	598.5	596	590.5
	1.304	596	598	590.5
	1.305	595	597.5	590.5
	1.306	595	595.5	590.5
	1.307	595.5	593.5	590.5
	1.308	595.5	599	590.5
	1.309	595	595.5	590.5
	1.31	595	595.5	588.5
	1.311	591.5	597	588
	1.312	592	596.5	586.5
	1.313	597.5	596	590
	1.314	595	598	590.5
	1.315	596	596	590.5
	1.316	592.5	597	590
	1.317	595	595	593.5
	1.318	593	595	590.5
	1.319	592.5	595	589
	1.32	593	595	590
	1.321	594.5	597.5	589.5
	1.322	594	596.5	589
	1.323	592	594	591.5
	1.324	592.5	592.5	590.5
	1.325	592	595	588
	1.326	591.5	595	590
	1.327	591.5	597.5	589
	1.328	596	592.5	590
	1.329	594.5	595.5	592.5
	1.33	592	598	590.5
	1.331	593	595.5	592.5
	1.332	593	597	593
	1.333	590.5	595	592.5
	1.334	591.5	594	594.5
	1.335	594.5	594.5	591.5
	1.336	594.5	590.5	592.5
	1.337	594.5	596	590.5
	1.338	592.5	593.5	593
	1.339	595	593	594.5
	1.34	590.5	592.5	590.5
	1.341	593.5	595.5	592.5
	1.342	591.5	590.5	591.5
	1.343	592.5	596.5	590.5
	1.344	595	593.5	592
	1.345	592	594.5	590
	1.346	594	594.5	595
	1.347	592.5	592.5	590.5
	1.348	592.5	594	597
	1.349	590	595	594.5
	1.35	593	593	593
	1.351	592.5	594	592
	1.352	595	593.5	590
	1.353	593.5	594.5	589.5
	1.354	592	593	592.5
	1.355	593	595	595
	1.356	594	595.5	589
	1.357	590.5	594	591.5
	1.358	595	594.5	594.5
	1.359	590.5	592.5	592
	1.36	597	594.5	588.5
	1.361	593.5	590.5	592
	1.362	594	593	595
	1.363	592.5	589.5	589.5
	1.364	590.5	596	590.5
	1.365	594.5	595	590.5
	1.366	596	590	594.5
	1.367	592	595.5	592.5
	1.368	594	593.5	591.5
	1.369	593	592.5	588
	1.37	592.5	594	595.5
	1.371	597	593.5	592.5
	1.372	595.5	589	591.5
	1.373	595.5	590	593.5
	1.374	595	594.5	595
	1.375	595	594.5	591.5
	1.376	592.5	590	592.5
	1.377	595	591.5	593.5
	1.378	594	595	594
	1.379	593	592.5	591.5
	1.38	599	594	597
	1.381	595	590.5	595
	1.382	597	594.5	594
	1.383	599	593.5	593.5
	1.384	594.5	597	595.5
	1.385	597.5	590	593
	1.386	599.5	597	593.5
	1.387	599	590.5	595
	1.388	596	595	593
	1.389	598	593	589
	1.39	601	594.5	595
	1.391	600	590	591.5
	1.392	605	592	592
	1.393	605.5	592.5	593
	1.394	604.5	595.5	595.5
	1.395	601.5	596.5	593
	1.396	605.5	598.5	594.5
	1.397	604.5	595	592.5
	1.398	609	595.5	598
	1.399	607	600.5	593
	1.4	607	597.5	596
	1.401	609.5	595	594
	1.402	608.5	597.5	595
	1.403	612	599	592.5
	1.404	614.5	598	597
	1.405	612.5	595.5	595
	1.406	613.5	596.5	591.5
	1.407	614.5	599	595.5
	1.408	612	597	594.5
	1.409	614	599.5	598
	1.41	617	598	595.5
	1.411	622	596	592.5
	1.412	615.5	600	592.5
	1.413	617	596.5	595
	1.414	618.5	597	596.5
	1.415	617.5	600	599
	1.416	620	595	592.5
	1.417	620	595	596
	1.418	620.5	595.5	593
	1.419	622.5	596	595.5
	1.42	620.5	596	596.5
	1.421	620.5	596.5	594
	1.422	620.5	598	597
	1.423	623.5	594	600
	1.424	622.5	595	596.5
	1.425	623	597.5	597.5
	1.426	619.5	595.5	600.5
	1.427	624	595.5	598
	1.428	624	595	597.5
	1.429	620.5	598	596.5
	1.43	626	598	599.5
	1.431	622	596	594
	1.432	624	595.5	599.5
	1.433	622	595	599
	1.434	622.5	595.5	598
	1.435	620.5	596	598.5
	1.436	627	596.5	599.5
	1.437	622	596	601.5
	1.438	623.5	597	602.5
	1.439	621.5	595	601.5
	1.44	622.5	600	601.5
	1.441	624.5	598	602.5
	1.442	620.5	599	601.5
	1.443	622	596.5	601
	1.444	623.5	593.5	603.5
	1.445	622	596.5	605.5
	1.446	626	599	606
	1.447	620.5	598.5	604
	1.448	619.5	596	608.5
	1.449	619	598	602.5
	1.45	620	592	606.5
	1.451	617.5	595.5	601
	1.452	620.5	600	607
	1.453	620.5	596	608
	1.454	620	597.5	608.5
	1.455	613.5	595.5	606.5
	1.456	618.5	596	609
	1.457	618	595	610.5
	1.458	616	595	610.5
	1.459	614.5	596.5	612
	1.46	615.5	595	608.5
	1.461	615.5	598	608
	1.462	614.5	597.5	609.5
	1.463	616	598	611
	1.464	615.5	598	606.5
	1.465	614	597	612
	1.466	613	598	612
	1.467	612.5	595.5	610
	1.468	612	599.5	612.5
	1.469	613	599	609
	1.47	610	596	610
	1.471	611	598	610
	1.472	614	598	611
	1.473	609	599.5	610.5
	1.474	606.5	598	609.5
	1.475	608.5	599	608.5
	1.476	608.5	598	612
	1.477	606.5	603.5	608.5
	1.478	605.5	600.5	609.5
	1.479	605.5	603.5	609
	1.48	605.5	596	607.5
	1.481	608.5	600.5	609.5
	1.482	605.5	602.5	609
	1.483	604	600.5	608
	1.484	602.5	601.5	607
	1.485	600.5	603	604
	1.486	600.5	601.5	605
	1.487	602.5	602	603.5
	1.488	601.5	604	603
	1.489	595	607	600.5
	1.49	598.5	605.5	599.5
	1.491	596	605.5	599
	1.492	596	604.5	600
	1.493	598	610	598.5
	1.494	598	607.5	593.5
	1.495	597	609.5	596.5
	1.496	594	605.5	590.5
	1.497	596.5	611	591.5
	1.498	591.5	607	590.5
	1.499	594.5	608.5	587
	1.5	590.5	608	585.5
	1.501	590	610	583
	1.502	586.5	611	582.5
	1.503	587.5	613	581.5
	1.504	587.5	606.5	582
	1.505	583	608	581.5
	1.506	582.5	610.5	575.5
	1.507	581	610.5	575
	1.508	579.5	611	575.5
	1.509	575.5	611.5	569.5
	1.51	575.5	608.5	567.5
	1.511	573	611	567.5
	1.512	573	610	562
	1.513	569	612.5	562.5
	1.514	569.5	609.5	559
	1.515	568	609	556
	1.516	564.5	612.5	553.5
	1.517	560.5	615.5	554.5
	1.518	560.5	612.5	547.5
	1.519	556	611	546
	1.52	557	610.5	543
	1.521	557.5	610.5	542
	1.522	553.5	608.5	537
	1.523	548.5	610.5	535.5
	1.524	548	610.5	529
	1.525	547	611.5	529.5
	1.526	546	615	525
	1.527	542	612	523
	1.528	545.5	611.5	519.5
	1.529	543.5	608.5	518
	1.53	542	612	516
	1.531	540.5	612	511
	1.532	537.5	608	508.5
	1.533	535.5	611	507
	1.534	537	612	502.5
	1.535	531.5	612.5	501.5
	1.536	533	607	498.5
	1.537	533	610.5	492.5
	1.538	532	610	492
	1.539	532	608	487
	1.54	524.5	610.5	487
	1.541	525.5	608.5	480
	1.542	526	611	479.5
	1.543	523.5	608.5	475
	1.544	523.5	604.5	472
	1.545	522.5	606.5	466
	1.546	525.5	608.5	467.5
	1.547	520.5	606	464
	1.548	523	601.5	465
	1.549	520.5	602.5	458.5
	1.55	518.5	604.5	456.5
	1.551	519.5	603.5	456.5
	1.552	516	602	452
	1.553	520	604	453
	1.554	516	600	448.5
	1.555	518	603.5	449.5
	1.556	516	599	446.5
	1.557	515.5	599.5	444.5
	1.558	513	602	441.5
	1.559	515	596	441.5
	1.56	513	596.5	442.5
	1.561	518	599	438.5
	1.562	513.5	596.5	440
	1.563	514	595	437
	1.564	512.5	597.5	436
	1.565	513	595	428.5
	1.566	510.5	595.5	433.5
	1.567	507.5	593	428.5
	1.568	505	592.5	432
	1.569	505	592.5	428.5
	1.57	501	589.5	430.5
	1.571	498.5	595.5	428.5
	1.572	494	594.5	429
	1.573	490	593.5	426.5
	1.574	488.5	592.5	425.5
	1.575	483	592.5	424.5
	1.576	481.5	591.5	423
	1.577	477.5	589	425.5
	1.578	471.5	590.5	423
	1.579	468	590.5	419
	1.58	465	590.5	417
	1.581	458	589	416.5
	1.582	452.5	586.5	414.5
	1.583	449	585.5	412
	1.584	444	582.5	413
	1.585	440.5	584.5	410
	1.586	436	583.5	405.5
	1.587	428.5	583.5	402.5
	1.588	417.5	581.5	401.5
	1.589	410	581.5	401.5
	1.59	403.5	578	397.5
	1.591	398.5	575.5	391.5
	1.592	390.5	573	386
	1.593	383.5	575.5	382
	1.594	374	570	382
	1.595	367.5	569.5	373
	1.596	362.5	568.5	372
	1.597	353.5	567.5	369
	1.598	344.5	566	360
	1.599	339	562.5	353
	1.6	331.5	559.5	350.5
	1.601	324.5	561	347.5
	1.602	314.5	556.5	341.5
	1.603	307.5	548.5	333
	1.604	303.5	549.5	328
	1.605	293	549	322
	1.606	287.5	541.5	312.5
	1.607	283	544	308.5
	1.608	270	540	301.5
	1.609	263	538	292
	1.61	259	535	284.5
	1.611	255	529.5	281.5
	1.612	248	530.5	277
	1.613	240.5	531	266.5
	1.614	237	527.5	257.5
	1.615	232.5	521	249.5
	1.616	226	524.5	245
	1.617	223	523.5	236.5
	1.618	218.5	522.5	225.5
	1.619	212	518	219.5
	1.62	208.5	516	214
	1.621	205	512.5	208.5
	1.622	200	510	196.5
	1.623	197.5	510.5	191.5
	1.624	193	509	180.5
	1.625	187	507.5	177
	1.626	185.5	505.5	167
	1.627	177.5	507.5	161
	1.628	179	504	155.5
	1.629	170.5	504.5	149
	1.63	168	500	142.5
	1.631	164	499	135
	1.632	161.5	496	129.5
	1.633	158	497	127
	1.634	152.5	499	123
	1.635	157	493.5	116.5
	1.636	149	495.5	115.5
	1.637	147	490.5	110.5
	1.638	141.5	491.5	109
	1.639	140	489.5	106
	1.64	136	492	104
	1.641	136.5	486	101
	1.642	133.5	487	98
	1.643	126.5	485	99.5
	1.644	130.5	483.5	95
	1.645	127	480	90.5
	1.646	126	482	92
	1.647	121.5	480	91.5
	1.648	121	478	87.5
	1.649	119.5	475.5	87.5
	1.65	116.5	472.5	88.5
	1.651	118	472.5	89
	1.652	113	473.5	91
	1.653	114.5	469	89.5
	1.654	113	471.5	88.5
	1.655	110.5	465.5	87.5
	1.656	111	464	89.5
	1.657	107.5	463.5	90.5
	1.658	106.5	462.5	88
	1.659	107	458	93.5
	1.66	103.5	454	93.5
	1.661	103.5	455	99
	1.662	99.5	449.5	98.5
	1.663	100.5	443.5	95.5
	1.664	100.5	440.5	98
	1.665	101.5	438.5	102
	1.666	96	437	105.5
	1.667	96.5	434.5	107
	1.668	97.5	430.5	109.5
	1.669	99	422.5	110
	1.67	95.5	417	112
	1.671	95.5	414	114.5
	1.672	96	412.5	115.5
	1.673	92	409.5	121
	1.674	94.5	403.5	123
	1.675	92	396.5	122.5
	1.676	93.5	396	125.5
	1.677	89	385.5	123
	1.678	93	380.5	124.5
	1.679	91	373	125
	1.68	92.5	372	127
	1.681	90.5	359.5	129.5
	1.682	92.5	352	129
	1.683	88.5	347.5	125.5
	1.684	92	342.5	126
	1.685	89	334.5	124.5
	1.686	90.5	325.5	126.5
	1.687	87.5	320.5	122
	1.688	90.5	310	121.5
	1.689	87	301	118.5
	1.69	88.5	296	120
	1.691	86.5	288	119.5
	1.692	87	279	120
	1.693	88.5	274	117.5
	1.694	88	266.5	116.5
	1.695	88.5	257.5	118
	1.696	88	251.5	117
	1.697	85.5	242.5	116
	1.698	83	237	118
	1.699	88.5	230.5	115
	1.7	85	223	116
	1.701	87	218.5	116
	1.702	87	208.5	116
	1.703	84.5	207	118
	1.704	84.5	200	116.5
	1.705	85.5	194	120
	1.706	86	187.5	119
	1.707	85.5	183.5	118
	1.708	85	178	118
	1.709	84	175	112.5
	1.71	83.5	167	120.5
	1.711	86	166.5	111.5
	1.712	86.5	157	114.5
	1.713	87	153.5	112
	1.714	88	151	115
	1.715	84	144.5	113.5
	1.716	84	142.5	113
	1.717	86.5	138.5	114
	1.718	89	136.5	114
	1.719	80.5	131.5	113
	1.72	85.5	131.5	113.5
	1.721	85.5	128	112.5
	1.722	82	126.5	112
	1.723	82	125	110.5
	1.724	80.5	123	107.5
	1.725	83	122	108
	1.726	82.5	124	109
	1.727	84.5	122	108.5
	1.728	82.5	121.5	110.5
	1.729	83.5	120	105.5
	1.73	81	120	108.5
	1.731	81	121.5	109
	1.732	82	122.5	110
	1.733	82	121	111
	1.734	82	117.5	110.5
	1.735	81.5	118	108.5
	1.736	81	118	109
	1.737	80.5	119.5	108
	1.738	86	117	109.5
	1.739	84	118	112.5
	1.74	82	118.5	112
	1.741	84.5	116.5	113.5
	1.742	84	115.5	113.5
	1.743	87	116	112
	1.744	86	118	112
	1.745	87	116.5	115
	1.746	86.5	111.5	115.5
	1.747	90	113.5	117
	1.748	91.5	112.5	119.5
	1.749	92	112	123.5
	1.75	91	111.5	120
	1.751	94	112.5	121.5
	1.752	101	111	123.5
	1.753	98.5	114.5	126
	1.754	101	110.5	129
	1.755	100.5	111.5	129.5
	1.756	103	111.5	131
	1.757	107	110	133.5
	1.758	106	112.5	135.5
	1.759	109	114.5	137.5
	1.76	112.5	111.5	138
	1.761	116.5	115.5	141
	1.762	114.5	113	146.5
	1.763	122	115	148.5
	1.764	122	114.5	153
	1.765	125	114.5	160.5
	1.766	127.5	116	160.5
	1.767	131	115.5	164.5
	1.768	134.5	114	170
	1.769	136	116	171
	1.77	141	113.5	176.5
	1.771	144.5	114.5	181.5
	1.772	148	111	184.5
	1.773	153	114	189.5
	1.774	155	114	195.5
	1.775	157	113.5	201
	1.776	163.5	111	204.5
	1.777	164.5	110.5	209.5
	1.778	166	106.5	214
	1.779	172.5	109.5	223.5
	1.78	176.5	104.5	226.5
	1.781	180.5	107	232
	1.782	183.5	107	236
	1.783	186.5	109	241
	1.784	193.5	108	248
	1.785	196	105	251.5
	1.786	202.5	108	259.5
	1.787	205	103.5	260.5
	1.788	206.5	102.5	270
	1.789	211	103	269
	1.79	219	102	273
	1.791	220	100	274.5
	1.792	227	100	282
	1.793	231	99	286
	1.794	236.5	99.5	285
	1.795	240	98	290.5
	1.796	246	97	293.5
	1.797	249	96	298.5
	1.798	253	95.5	301
	1.799	257	95	306
	1.8	262.5	91.5	312
	1.801	267	92	313
	1.802	276.5	94	320.5
	1.803	280	89	325
	1.804	288.5	87.5	330
	1.805	292.5	90.5	332.5
	1.806	302	86.5	339
	1.807	311	88.5	343.5
	1.808	315	82	349
	1.809	321	89	358
	1.81	329.5	83.5	363.5
	1.811	333	87	365
	1.812	339.5	84.5	372
	1.813	344.5	86	383
	1.814	353.5	86.5	390
	1.815	357.5	85.5	400
	1.816	361	88.5	402.5
	1.817	367	85.5	413
	1.818	375	90.5	422.5
	1.819	383	86	435
	1.82	387.5	91	439.5
	1.821	394.5	90	446
	1.822	400.5	87	456.5
	1.823	407.5	91	471
	1.824	411.5	91	481.5
	1.825	420.5	91	493
	1.826	425.5	88.5	506.5
	1.827	432.5	89	519
	1.828	441.5	93.5	529
	1.829	448	92	544.5
	1.83	455	95.5	554
	1.831	468.5	95.5	570
	1.832	475	97	580.5
	1.833	484.5	101	595
	1.834	494.5	102.5	608
	1.835	503.5	99.5	619.5
	1.836	514	99.5	632.5
	1.837	526	103	649
	1.838	537.5	106	660.5
	1.839	552.5	108.5	674
	1.84	563.5	107	684.5
	1.841	579	109	700.5
	1.842	592	112	710
	1.843	609	117	724.5
	1.844	627.5	117.5	734.5
	1.845	642	116	748.5
	1.846	654	119	754.5
	1.847	672	122	769
	1.848	691.5	126	776.5
	1.849	708.5	128	790.5
	1.85	724.5	129	801
	1.851	746	134	812.5
	1.852	764	132.5	822.5
	1.853	783	142	831
	1.854	804	138.5	837.5
	1.855	819	142.5	848
	1.856	845.5	143.5	861
	1.857	857	147.5	867.5
	1.858	874	153.5	874
	1.859	893	157	882
	1.86	911.5	156.5	890.5
	1.861	925	156.5	898
	1.862	941	163	903
	1.863	957	164	913
	1.864	973	168.5	916.5
	1.865	984	171.5	923
	1.866	999.5	176	933.5
	1.867	1011.5	178.5	938.5
	1.868	1028.5	186.5	951.5
	1.869	1038	189	957.5
	1.87	1051.5	191	965.5
	1.871	1067	198	972
	1.872	1077.5	201.5	978
	1.873	1086.5	207.5	989.5
	1.874	1097.5	207.5	999.5
	1.875	1110	212	1008
	1.876	1119.5	217	1023
	1.877	1130	222.5	1029.5
	1.878	1142	226.5	1038
	1.879	1154	225.5	1049.5
	1.88	1165.5	232	1057
	1.881	1171	237	1067.5
	1.882	1181.5	243	1079
	1.883	1193.5	246	1090.5
	1.884	1205.5	250.5	1100.5
	1.885	1210	258	1110
	1.886	1219.5	259.5	1121
	1.887	1229	263.5	1129.5
	1.888	1237.5	266.5	1139
	1.889	1245.5	271.5	1148.5
	1.89	1253	277.5	1160
	1.891	1265	278.5	1172
	1.892	1270.5	286	1181
	1.893	1281.5	289	1185
	1.894	1291.5	292.5	1199.5
	1.895	1300.5	298	1208.5
	1.896	1306.5	303.5	1215
	1.897	1319	306	1222
	1.898	1328	311.5	1231.5
	1.899	1340.5	315.5	1239
	1.9	1350	321.5	1250.5
	1.901	1357.5	324	1256.5
	1.902	1366	326.5	1264.5
	1.903	1376	335	1273.5
	1.904	1381	342	1279
	1.905	1395.5	348.5	1284
	1.906	1402	353	1291.5
	1.907	1410.5	357.5	1301
	1.908	1417	367	1306.5
	1.909	1425.5	370.5	1316.5
	1.91	1436.5	377	1324.5
	1.911	1444	383.5	1333.5
	1.912	1455.5	391.5	1336
	1.913	1460.5	400	1345
	1.914	1468.5	406.5	1351
	1.915	1476.5	419	1358.5
	1.916	1484.5	428.5	1362.5
	1.917	1490.5	435.5	1370.5
	1.918	1498	444.5	1375.5
	1.919	1505.5	456.5	1381
	1.92	1515	466.5	1391
	1.921	1522	474	1392
	1.922	1525.5	489	1395.5
	1.923	1530	501	1406.5
	1.924	1539.5	513	1408.5
	1.925	1544.5	526.5	1416
	1.926	1548.5	539.5	1416.5
	1.927	1554	552.5	1429.5
	1.928	1559.5	569	1433
	1.929	1561.5	579.5	1440.5
	1.93	1567	598	1450
	1.931	1568.5	615	1459.5
	1.932	1572	635.5	1465
	1.933	1572	650	1470.5
	1.934	1578	670.5	1479.5
	1.935	1579	688.5	1483.5
	1.936	1586	705.5	1496
	1.937	1587	726.5	1503.5
	1.938	1589.5	739.5	1511.5
	1.939	1589.5	759	1521
	1.94	1589.5	776	1529.5
	1.941	1598	793	1536
	1.942	1604	808.5	1541.5
	1.943	1604.5	825	1544.5
	1.944	1607.5	840.5	1558
	1.945	1611	859	1562
	1.946	1604.5	874	1567.5
	1.947	1611	887.5	1571.5
	1.948	1614	902.5	1580
	1.949	1616.5	918.5	1582
	1.95	1616.5	933.5	1586
	1.951	1617.5	946	1589
	1.952	1618.5	961.5	1589.5
	1.953	1619.5	978	1596.5
	1.954	1619.5	987	1600.5
	1.955	1619.5	1000.5	1600.5
	1.956	1619.5	1017.5	1602.5
	1.957	1619.5	1030.5	1604.5
	1.958	1626	1043	1604.5
	1.959	1619.5	1052	1611.5
	1.96	1619.5	1065.5	1613.5
	1.961	1619.5	1073.5	1611
	1.962	1618	1086.5	1618.5
	1.963	1619.5	1101.5	1619.5
	1.964	1616.5	1112.5	1619.5
	1.965	1614	1123.5	1630
	1.966	1619.5	1132	1634.5
	1.967	1618	1142	1641
	1.968	1619.5	1157	1641.5
	1.969	1619.5	1166	1645.5
	1.97	1617.5	1172	1649
	1.971	1615	1183.5	1656.5
	1.972	1616.5	1192.5	1661.5
	1.973	1617.5	1205.5	1664
	1.974	1618	1214.5	1664
	1.975	1619.5	1223.5	1664
	1.976	1619.5	1231.5	1671
	1.977	1618.5	1239	1673.5
	1.978	1619.5	1252.5	1677.5
	1.979	1619.5	1260.5	1679
	1.98	1619.5	1274	1681
	1.981	1626	1280	1679
	1.982	1628	1291.5	1683
	1.983	1626	1311	1685
	1.984	1626.5	1318	1682.5
	1.985	1628.5	1328.5	1682
	1.986	1626.5	1336	1683
	1.987	1631.5	1350.5	1682.5
	1.988	1627	1365	1679
	1.989	1629.5	1376.5	1682
	1.99	1630.5	1390.5	1682.5
	1.991	1628.5	1402	1679
	1.992	1633	1418	1682.5
	1.993	1629.5	1425.5	1678.5
[truncated: 6,006 more rows]

## Sheet: I
DataTypeVer2.0	Time	Fz	Fz	Fz
NumberOfData		15000	15000	15000
PreTriggerData		0	0	0
SamplingTime[ms]		1	1	1
DataLabel		AJ1:CMJ	AJ2:CMJ	AJ3:CMJ
DataUnit	sec	N	N	N
	0	613	608.5	615.5
	0.001	615.5	606.5	614.5
	0.002	613	612	614.5
	0.003	611	609.5	616.5
	0.004	610.5	608.5	616
	0.005	613.5	609.5	617
	0.006	613	608.5	614.5
	0.007	613	611	617
	0.008	615	610.5	615.5
	0.009	611	609	617.5
	0.01	611.5	609.5	621
	0.011	611.5	612.5	618.5
	0.012	610.5	610	618.5
	0.013	610	612	618.5
	0.014	610	607.5	618.5
	0.015	611	608.5	617.5
	0.016	612.5	609.5	621.5
	0.017	610	609	616.5
	0.018	609	608.5	617
	0.019	611	611	618.5
	0.02	610.5	611	618.5
	0.021	607.5	613	621.5
	0.022	613	614.5	616
	0.023	612	613.5	621
	0.024	610.5	613.5	621.5
	0.025	608.5	610.5	618
	0.026	608.5	615	618.5
	0.027	612	611	617
	0.028	611.5	613.5	618.5
	0.029	609.5	610.5	615.5
	0.03	610	613.5	615.5
	0.031	611	615.5	615.5
	0.032	607	611.5	615.5
	0.033	610	615	618.5
	0.034	612	612.5	615.5
	0.035	610	613	618.5
	0.036	608.5	610.5	616.5
	0.037	610.5	612.5	615.5
	0.038	612	616	615.5
	0.039	608.5	617	618.5
	0.04	610	613.5	613
	0.041	609.5	611	618
	0.042	608.5	614.5	614
	0.043	608.5	613	615.5
	0.044	607	615.5	613
	0.045	610.5	614	612.5
	0.046	608.5	615	610.5
	0.047	610	616.5	612.5
	0.048	606.5	613	613
	0.049	608	612	613.5
	0.05	609	610.5	613.5
	0.051	607	613	613
	0.052	606.5	609.5	612
	0.053	603.5	613	611.5
	0.054	607	612.5	609.5
	0.055	610.5	613.5	609.5
	0.056	606.5	611	609
	0.057	603.5	615.5	610
	0.058	607.5	612	613.5
	0.059	608.5	611	608.5
	0.06	606.5	611	610
	0.061	608.5	612	608.5
	0.062	603.5	613	606.5
	0.063	607.5	611	608
	0.064	608.5	609.5	608
	0.065	606.5	608.5	608.5
	0.066	606	610.5	609.5
	0.067	608	609	610
	0.068	605.5	613	607.5
	0.069	603.5	610.5	607
	0.07	603.5	611	606.5
	0.071	608.5	613	607.5
	0.072	606.5	610.5	603.5
	0.073	605	609	609.5
	0.074	606.5	608.5	606
	0.075	606.5	610	603.5
	0.076	603.5	607.5	603.5
	0.077	605	608.5	605.5
	0.078	605	608.5	603.5
	0.079	603.5	608.5	608.5
	0.08	605.5	608.5	606
	0.081	605.5	609	603
	0.082	607	605.5	603.5
	0.083	606.5	608	607
	0.084	603.5	608	606.5
	0.085	606.5	609	603
	0.086	603.5	605.5	606.5
	0.087	603.5	605.5	603.5
	0.088	607	609	607.5
	0.089	605	606.5	607
	0.09	605.5	609.5	603.5
	0.091	603	608	603.5
	0.092	605	608.5	606.5
	0.093	603.5	606	603.5
	0.094	607.5	607.5	603.5
	0.095	606	608.5	606.5
	0.096	609	609.5	607
	0.097	607.5	606.5	610
	0.098	603.5	609	608.5
	0.099	609	607.5	608.5
	0.1	605.5	606	608.5
	0.101	607	607.5	603.5
	0.102	608.5	607.5	607.5
	0.103	607	607	610
	0.104	608.5	608.5	609
	0.105	608.5	606.5	609
	0.106	608.5	603.5	609
	0.107	607.5	603.5	607.5
	0.108	611	606.5	609
	0.109	608.5	607.5	610
	0.11	613	608.5	608.5
	0.111	611	607	608.5
	0.112	610	607.5	614
	0.113	610.5	610	608.5
	0.114	612	609	610.5
	0.115	610.5	608.5	610
	0.116	610.5	607.5	610
	0.117	614	610	611.5
	0.118	613.5	609	608.5
	0.119	614	607	609.5
	0.12	612.5	611.5	614.5
	0.121	612.5	609	610.5
	0.122	612.5	610	613
	0.123	614	610	612.5
	0.124	608.5	610.5	609.5
	0.125	612	612.5	609.5
	0.126	612	611	612
	0.127	613	609.5	613.5
	0.128	613.5	611	613.5
	0.129	611	613	610
	0.13	615	613.5	608.5
	0.131	610	610	608
	0.132	610.5	608.5	613.5
	0.133	611.5	610	610
	0.134	612.5	614	609.5
	0.135	611.5	611	611
	0.136	610.5	610	608
	0.137	610	612	611
	0.138	610	614.5	610.5
	0.139	614.5	615	610
	0.14	611.5	611	611
	0.141	612	611	606.5
	0.142	609.5	615.5	608.5
	0.143	610	613.5	609
	0.144	608.5	613	608.5
	0.145	610	615	611
	0.146	608.5	612	610
	0.147	609.5	611	608
	0.148	610.5	612	611.5
	0.149	614	611.5	607
	0.15	611.5	612	608.5
	0.151	609.5	612.5	607.5
	0.152	610	612	605.5
	0.153	610.5	611	607
	0.154	606.5	612	606.5
	0.155	610	611	607
	0.156	608.5	610.5	606.5
	0.157	607.5	608.5	610.5
	0.158	610.5	610.5	603.5
	0.159	610	609	604.5
	0.16	610.5	610.5	603.5
	0.161	611.5	609	606.5
	0.162	612.5	609	607
	0.163	610	610.5	606
	0.164	610	608.5	603.5
	0.165	611	605.5	603.5
	0.166	607.5	612.5	603.5
	0.167	609.5	612.5	606.5
	0.168	610.5	603.5	603.5
	0.169	610	609	603
	0.17	609	611	607.5
	0.171	612	607.5	603.5
	0.172	609	608.5	603.5
	0.173	611	608.5	603
	0.174	611	608.5	603.5
	0.175	610	607.5	603.5
	0.176	617	607.5	608
	0.177	609	607	605.5
	0.178	611	608.5	603.5
	0.179	614.5	603.5	605
	0.18	611	605	607
	0.181	614.5	603.5	603.5
	0.182	615.5	603.5	609.5
	0.183	608.5	603.5	607.5
	0.184	615.5	605	608
	0.185	615.5	606.5	610
	0.186	613	605	607
	0.187	613.5	603	608.5
	0.188	614	606.5	606.5
	0.189	614	606	607.5
	0.19	614.5	603.5	607.5
	0.191	611	603.5	609
	0.192	615	606.5	608.5
	0.193	612	610	611
	0.194	615.5	605.5	612
	0.195	612.5	603.5	610.5
	0.196	613.5	603.5	613
	0.197	615.5	605	609.5
	0.198	614.5	608.5	611
	0.199	615.5	603.5	615
	0.2	615	605.5	613
	0.201	613.5	606.5	616
	0.202	611.5	610.5	613.5
	0.203	610.5	603.5	614
	0.204	613	610	618
	0.205	615	608	615.5
	0.206	611.5	608.5	615.5
	0.207	614	607.5	614
	0.208	616	608.5	617.5
	0.209	613.5	607	618
	0.21	611	608.5	616.5
	0.211	613	603.5	615.5
	0.212	611	607.5	617.5
	0.213	615.5	607.5	616
	0.214	612	603.5	616
	0.215	610.5	607.5	615.5
	0.216	612	609	616.5
	0.217	609	610	622
	0.218	611	608.5	614.5
	0.219	613	609.5	614.5
	0.22	613.5	607	615.5
	0.221	612	608.5	618.5
	0.222	615.5	607.5	615.5
	0.223	611	608.5	614.5
	0.224	610	607.5	614.5
	0.225	611.5	608.5	615
	0.226	612	610	615
	0.227	608.5	610.5	615.5
	0.228	608	610.5	614.5
	0.229	610	610	613.5
	0.23	609.5	609	612.5
	0.231	610.5	613	613
	0.232	609	610.5	616
	0.233	613	609.5	611
	0.234	607.5	610	611.5
	0.235	607.5	610.5	615
	0.236	607.5	611	613.5
	0.237	609.5	611	613
	0.238	610	608.5	611
	0.239	609	615	611
	0.24	603.5	610	613
	0.241	609	607.5	611
	0.242	608.5	610	609.5
	0.243	612.5	612	612
	0.244	608	611	609
	0.245	606	609	609
	0.246	608.5	612.5	612.5
	0.247	608	612	613.5
	0.248	608	612	611
	0.249	606.5	611.5	609.5
	0.25	607.5	615	610.5
	0.251	608.5	611.5	608
	0.252	608.5	613	603.5
	0.253	607.5	613.5	609.5
	0.254	606.5	614	608.5
	0.255	606.5	611	608.5
	0.256	610.5	609.5	608
	0.257	607	613	608.5
	0.258	606	611	603.5
	0.259	609	610	607.5
	0.26	606	611	608.5
	0.261	607.5	612.5	606.5
	0.262	608	612	606.5
	0.263	611	608.5	607
	0.264	611.5	610.5	611
	0.265	609	613	607.5
	0.266	608.5	611	605.5
	0.267	610	612	607.5
	0.268	609	612.5	606.5
	0.269	606.5	610.5	607.5
	0.27	609.5	610.5	608
	0.271	610.5	610	610.5
	0.272	603	611	610.5
	0.273	609.5	611	608.5
	0.274	610	609.5	608.5
	0.275	605.5	610.5	607.5
	0.276	608	612.5	610.5
	0.277	606	613	609.5
	0.278	608.5	611	609.5
	0.279	609.5	612.5	611
	0.28	607.5	609	608.5
	0.281	608.5	613	606.5
	0.282	609.5	608.5	609
	0.283	609.5	612.5	611
	0.284	609	611	610
	0.285	611	614	609
	0.286	608.5	612.5	608
	0.287	614	610	610.5
	0.288	610.5	610.5	611
	0.289	610.5	609	609.5
	0.29	612	611.5	610
	0.291	606.5	611.5	607.5
	0.292	611	611	609
	0.293	609	612.5	611.5
	0.294	611	610.5	608
	0.295	610	608.5	611
	0.296	612.5	606.5	610.5
	0.297	610.5	610	612
	0.298	613.5	610	614
	0.299	607.5	610	612
	0.3	611.5	613	611.5
	0.301	612.5	609	609.5
	0.302	610.5	612.5	611
	0.303	608.5	613.5	612
	0.304	609.5	609	612
	0.305	611.5	611	611
	0.306	609	612.5	612.5
	0.307	610	609.5	608.5
	0.308	610.5	608.5	607.5
	0.309	610.5	607	612
	0.31	608.5	609	609.5
	0.311	612.5	607.5	605.5
	0.312	613	610.5	609
	0.313	606.5	608.5	610.5
	0.314	613	609	607.5
	0.315	610.5	608.5	608
	0.316	612	611.5	608.5
	0.317	608.5	611	605
	0.318	611	608.5	607
	0.319	613	611	609
	0.32	611	614	606.5
	0.321	612	611	610
	0.322	608.5	609	607
	0.323	610.5	610	609
	0.324	610.5	611	603.5
	0.325	611	610	603.5
	0.326	607.5	610	606.5
	0.327	611	608.5	603.5
	0.328	609	611	606
	0.329	609	611	603.5
	0.33	609	607	606.5
	0.331	609.5	612.5	608.5
	0.332	608.5	609	603
	0.333	615	609	603.5
	0.334	613	608.5	602
	0.335	612	608	603
	0.336	610.5	607.5	603.5
	0.337	614	607	603.5
	0.338	610	611	603.5
	0.339	612.5	610	603.5
	0.34	611	609	601
	0.341	610.5	608.5	600.5
	0.342	613.5	608.5	603.5
	0.343	608.5	606.5	601.5
	0.344	611.5	610.5	599.5
	0.345	612	612	603.5
	0.346	610	608.5	605.5
	0.347	612.5	608.5	603.5
	0.348	610	608.5	607.5
	0.349	611	608.5	603.5
	0.35	613.5	608.5	601.5
	0.351	613	607	606.5
	0.352	610.5	609	603.5
	0.353	610	608.5	603.5
	0.354	610	607.5	603
	0.355	613	606.5	608
	0.356	611	608.5	605.5
	0.357	609	609	601.5
	0.358	610	609	605.5
	0.359	612.5	606.5	605.5
	0.36	611.5	606	603.5
	0.361	607	607	605.5
	0.362	611	609	603.5
	0.363	610	606	607
	0.364	612.5	606	607.5
	0.365	613	603.5	609
	0.366	608	608.5	609.5
	0.367	614.5	606.5	608
	0.368	610	603.5	607.5
	0.369	612	606.5	606
	0.37	613.5	606.5	610
	0.371	610	610	608
	0.372	614	607.5	608.5
	0.373	611.5	605.5	610
	0.374	611	607.5	608.5
	0.375	610	608.5	610
	0.376	609	609	611.5
	0.377	613.5	608.5	608.5
	0.378	611	603.5	609.5
	0.379	614.5	606.5	610
	0.38	613	607	609
	0.381	613	603.5	610
	0.382	610.5	606	610.5
	0.383	612	605.5	612.5
	0.384	613.5	607	610.5
	0.385	611.5	602.5	613.5
	0.386	613.5	606	611
	0.387	616	609	614
	0.388	614	603.5	614.5
	0.389	614.5	608	611
	0.39	612.5	605.5	611
	0.391	614.5	605.5	613
	0.392	614	603.5	611
	0.393	613	605	611.5
	0.394	614	607	613
	0.395	612.5	603.5	611
	0.396	612	603	612
	0.397	613	603.5	611
	0.398	609	608.5	611
	0.399	612.5	605.5	615
	0.4	615	603.5	608.5
	0.401	612.5	603.5	610
	0.402	615	606	615.5
	0.403	615	605	608.5
	0.404	613	603.5	609.5
	0.405	610.5	605.5	611.5
	0.406	613.5	603.5	613.5
	0.407	611.5	603.5	610.5
	0.408	610	609	610
	0.409	612.5	603.5	612
	0.41	613	607	610.5
	0.411	610	607	611.5
	0.412	613.5	603.5	612.5
	0.413	610.5	607	614
	0.414	609.5	608.5	612.5
	0.415	611	609	610
	0.416	608.5	603.5	612.5
	0.417	614	606.5	608
	0.418	613	608.5	613
	0.419	613	607.5	615.5
	0.42	612	608.5	608.5
	0.421	613	606.5	609.5
	0.422	613.5	607	611.5
	0.423	616	606.5	610
	0.424	613	608.5	607
	0.425	613	609.5	611.5
	0.426	609	611	611
	0.427	609	607.5	610
	0.428	611	611	608.5
	0.429	610	614	612
	0.43	609	610	612.5
	0.431	609.5	608.5	610
	0.432	610	613	608.5
	0.433	609	612.5	608.5
	0.434	612.5	615	608.5
	0.435	610	611	612
	0.436	610	609	610
	0.437	607.5	609	606
	0.438	610.5	609	612.5
	0.439	607	615	607.5
	0.44	607.5	615.5	612.5
	0.441	611	613.5	608.5
	0.442	610	612	607.5
	0.443	611	612.5	608
	0.444	608.5	614.5	609
	0.445	609	612	610
	0.446	609	615.5	607
	0.447	612	614	608.5
	0.448	608.5	613	611
	0.449	608.5	616	609.5
	0.45	610	615	609.5
	0.451	610.5	616.5	610.5
	0.452	608	612.5	611
	0.453	610	614.5	609.5
	0.454	607.5	617	612
	0.455	604.5	615.5	614
	0.456	606.5	615.5	610
	0.457	609	614.5	613
	0.458	603.5	614.5	609
	0.459	610.5	615	612.5
	0.46	610.5	615.5	609.5
	0.461	606	613	614
	0.462	611	618	610.5
	0.463	606.5	614	611
	0.464	609.5	615	610.5
	0.465	608.5	614.5	610.5
	0.466	608	615.5	607
	0.467	607.5	614	611
	0.468	606.5	614	614
	0.469	607.5	611	611.5
	0.47	609.5	614	608.5
	0.471	607.5	610.5	612.5
	0.472	608.5	615.5	612
	0.473	603.5	611	607.5
	0.474	608.5	613	613
	0.475	611	612	612
	0.476	610	611.5	611
	0.477	607.5	612.5	612.5
	0.478	610.5	613	608.5
	0.479	608.5	611	609.5
	0.48	610	610.5	613
	0.481	611	611	612
	0.482	610	614.5	611.5
	0.483	608	609	608.5
	0.484	608	610	612
	0.485	603.5	613.5	607.5
	0.486	608.5	611	608.5
	0.487	610	608.5	609.5
	0.488	610.5	611	609.5
	0.489	611	608.5	610
	0.49	608.5	609.5	610.5
	0.491	613	611	612
	0.492	608.5	607.5	612
	0.493	607	612	609
	0.494	610	610	608
	0.495	614	609.5	608
	0.496	610	607	609.5
	0.497	610.5	609	608.5
	0.498	611.5	609	607
	0.499	609	607.5	607
	0.5	612.5	606.5	608.5
	0.501	610	606	608.5
	0.502	610.5	608.5	606.5
	0.503	609	609.5	613.5
	0.504	609	607.5	605.5
	0.505	609.5	612	605.5
	0.506	606	608	606
	0.507	609.5	606	607.5
	0.508	610.5	608.5	608.5
	0.509	609	608.5	607.5
	0.51	609	609	609
	0.511	608.5	609	609
	0.512	613.5	607.5	605.5
	0.513	612	609	609
	0.514	611	607.5	608.5
	0.515	609.5	609	606
	0.516	609.5	607.5	603.5
	0.517	609.5	609	608.5
	0.518	607.5	608.5	605.5
	0.519	608.5	608.5	606.5
	0.52	611.5	610	605.5
	0.521	607	607.5	603.5
	0.522	611	606	606.5
	0.523	610	612	606
	0.524	612	607.5	606.5
	0.525	608.5	610.5	608.5
	0.526	609.5	607.5	607.5
	0.527	609.5	613	603.5
	0.528	610.5	609	608.5
	0.529	610	608.5	606
	0.53	608.5	610	605.5
	0.531	610.5	610.5	608
	0.532	608.5	610	607.5
	0.533	605.5	609	610
	0.534	606.5	612.5	607
	0.535	608.5	610.5	608.5
	0.536	603.5	613.5	608
	0.537	608.5	609.5	603.5
	0.538	605	608.5	610
	0.539	603.5	610	608.5
	0.54	610.5	612	610
	0.541	606.5	610.5	610
	0.542	607.5	607.5	614
	0.543	606.5	615	609.5
	0.544	607	613	614.5
	0.545	603.5	608.5	610
	0.546	605.5	612	612
	0.547	606.5	610.5	610
	0.548	603.5	610	613.5
	0.549	608	611	609
	0.55	603.5	612	611.5
	0.551	605.5	611.5	614.5
	0.552	603.5	616.5	617
	0.553	607.5	612.5	613
	0.554	605	614.5	615.5
	0.555	607.5	612.5	615
	0.556	607.5	614.5	615
	0.557	606.5	611	611
	0.558	605.5	608.5	614.5
	0.559	605.5	611.5	615
	0.56	603.5	611	613.5
	0.561	606.5	611.5	614
	0.562	607.5	611	616.5
	0.563	610.5	615.5	612.5
	0.564	608.5	611	614.5
	0.565	611	610.5	614
	0.566	608.5	612	615.5
	0.567	607	610.5	618.5
	0.568	610.5	610.5	612.5
	0.569	606	608.5	615.5
	0.57	610	610.5	616.5
	0.571	614.5	612.5	613.5
	0.572	611	613	615
	0.573	610	613.5	612
	0.574	612	611	617.5
	0.575	612.5	609	613
	0.576	609.5	606	614.5
	0.577	614.5	609.5	614
	0.578	613.5	609	612.5
	0.579	614	611	610
	0.58	611	613	611.5
	0.581	610.5	609	614
	0.582	612.5	611.5	611
	0.583	614	608.5	610
	0.584	612.5	611.5	614
	0.585	612	608.5	610.5
	0.586	614.5	608.5	610.5
	0.587	613.5	609.5	609.5
	0.588	615.5	609.5	609
	0.589	612.5	606.5	609.5
	0.59	615.5	610.5	610
	0.591	615.5	608.5	608
	0.592	612	609	608.5
	0.593	614	609	607.5
	0.594	614	607.5	607.5
	0.595	613	607.5	607.5
	0.596	612.5	603.5	606.5
	0.597	614.5	606	603.5
	0.598	614.5	603.5	605.5
	0.599	614	606.5	609.5
	0.6	618.5	609.5	605.5
	0.601	614	605.5	608.5
	0.602	614.5	607.5	606.5
	0.603	614	606	608.5
	0.604	614.5	605.5	610.5
	0.605	616	607.5	608.5
	0.606	615.5	608.5	603.5
	0.607	614	603.5	607.5
	0.608	614.5	603.5	607
	0.609	615.5	606.5	608.5
	0.61	614	605.5	603.5
	0.611	613.5	609	607.5
	0.612	612.5	608	606
	0.613	614	607	608.5
	0.614	614.5	607.5	607
	0.615	614	608.5	609.5
	0.616	616.5	606.5	610
	0.617	614	610	608.5
	0.618	613.5	609	612.5
	0.619	610	608.5	608.5
	0.62	610	610.5	608
	0.621	613	610	606
	0.622	609.5	607	611
	0.623	612	608.5	610
	0.624	611	607.5	607
	0.625	615.5	610.5	614
	0.626	615	608.5	610.5
	0.627	607.5	606.5	610.5
	0.628	612	608.5	610.5
	0.629	610.5	610	611
	0.63	612	610	611.5
	0.631	609.5	609	611
	0.632	614	613	612
	0.633	610	611	610.5
	0.634	611	611.5	615
	0.635	608	613.5	615.5
	0.636	609	609.5	611.5
	0.637	608	609	614
	0.638	607	614.5	618.5
	0.639	612	612	613.5
	0.64	607.5	612.5	615
	0.641	608	614	612
	0.642	607.5	612	614.5
	0.643	608.5	611	613
	0.644	609	612	618.5
	0.645	607.5	613	614.5
	0.646	603.5	610	614
	0.647	607	613	616
	0.648	605.5	612.5	615.5
	0.649	606.5	609.5	616
	0.65	605.5	614	616
	0.651	603.5	613	615.5
	0.652	605.5	611.5	614
	0.653	609.5	613.5	616
	0.654	605.5	613.5	616.5
	0.655	607	611.5	618
	0.656	602.5	613	615
	0.657	602.5	611	615
	0.658	606.5	615.5	618
	0.659	608.5	616.5	617
	0.66	607.5	612.5	614.5
	0.661	606	614.5	614
	0.662	606	613	614
	0.663	608.5	612	615.5
	0.664	606.5	614.5	616
	0.665	607.5	613	614
	0.666	602	614	615.5
	0.667	611	614.5	613.5
	0.668	610	615	615.5
	0.669	603.5	612.5	615.5
	0.67	603.5	612.5	615
	0.671	603.5	611.5	613.5
	0.672	612.5	610	612.5
	0.673	603.5	612	614
	0.674	603.5	613	615
	0.675	609	609.5	610
	0.676	606.5	614	612
	0.677	609	611	609.5
	0.678	608.5	610	610
	0.679	608	612	608.5
	0.68	608.5	609	612.5
	0.681	610.5	609.5	608.5
	0.682	608	609.5	609
	0.683	609	611	609
	0.684	611	609	610
	0.685	608.5	611	608
	0.686	611.5	609	608.5
	0.687	612	609	607
	0.688	609.5	611	607.5
	0.689	612	611	603.5
	0.69	610.5	606.5	610
	0.691	612	611	605.5
	0.692	610	607	608.5
	0.693	611.5	603.5	606
	0.694	613	608.5	608.5
	0.695	612	609.5	606.5
	0.696	611	607.5	603.5
	0.697	612.5	608.5	608
	0.698	613	609	607.5
	0.699	610	608.5	606
	0.7	612.5	607.5	606.5
	0.701	612.5	609	608.5
	0.702	610	607.5	603.5
	0.703	611	609.5	605.5
	0.704	607.5	609.5	606
	0.705	614	609.5	608
	0.706	608.5	607.5	605.5
	0.707	609	606	601.5
	0.708	612.5	609	603.5
	0.709	610	609	606
	0.71	610	610	605.5
	0.711	611	611	601.5
	0.712	613.5	609	603.5
	0.713	611	612	603
	0.714	609.5	608.5	608.5
	0.715	610.5	610.5	603.5
	0.716	608	608.5	607
	0.717	610	609	603
	0.718	612.5	610.5	605.5
	0.719	614	611.5	607
	0.72	611	609.5	603.5
	0.721	608.5	611.5	608.5
	0.722	615	609	608
	0.723	609.5	610.5	603.5
	0.724	611	610.5	605.5
	0.725	609.5	613.5	608
	0.726	611	613	607.5
	0.727	609.5	613.5	603.5
	0.728	613	614.5	606.5
	0.729	614	612	605.5
	0.73	609.5	611	603.5
	0.731	614	612	607.5
	0.732	610.5	611.5	601.5
	0.733	610	613.5	608.5
	0.734	615	614	607.5
	0.735	611	616.5	607
	0.736	607.5	616	606
	0.737	614	614.5	606.5
	0.738	611	614.5	603.5
	0.739	611	613.5	605
	0.74	608.5	611.5	608.5
	0.741	608	610.5	608.5
	0.742	612	614	609.5
	0.743	611.5	612	608.5
	0.744	611	617	611
	0.745	613	615	609
	0.746	611	613.5	608
	0.747	609.5	615.5	609
	0.748	606	613.5	609.5
	0.749	607.5	615.5	609
	0.75	610	614.5	605
	0.751	610	615	610.5
	0.752	612	614	609
	0.753	610	613.5	607
	0.754	607.5	614	609.5
	0.755	611	611	608.5
	0.756	610.5	615.5	606.5
	0.757	613	614	610
	0.758	608.5	616.5	609
	0.759	609	613	609.5
	0.76	611.5	612	612
	0.761	612.5	611	612
	0.762	612.5	612.5	611
	0.763	612	612.5	612.5
	0.764	612	609.5	611
	0.765	611	614.5	608
	0.766	614.5	612.5	610
	0.767	610	614.5	608.5
	0.768	613.5	612	611
	0.769	613.5	611.5	611.5
	0.77	609.5	612	611
	0.771	612	609	608.5
	0.772	612.5	612	608.5
	0.773	611	607	609
	0.774	611.5	610	611
	0.775	609	610.5	610
	0.776	614	609.5	611
	0.777	613	607	612
	0.778	615	611	609.5
	0.779	614	608.5	609
	0.78	615	609	608.5
	0.781	615	609	607.5
	0.782	613.5	608	612.5
	0.783	613	606.5	609.5
	0.784	613	608.5	610
	0.785	612	606	612
	0.786	618.5	603.5	608
	0.787	618.5	611	613
	0.788	614	603.5	610
	0.789	613	607.5	614.5
	0.79	609	603.5	611
	0.791	614.5	605.5	608.5
	0.792	615	608	610.5
	0.793	614	605.5	611
	0.794	612.5	608.5	610
	0.795	613.5	603.5	608.5
	0.796	616	603.5	611
	0.797	612.5	610	610
	0.798	613	603.5	610
	0.799	609	607	611
	0.8	612	603.5	611.5
	0.801	612.5	608	612.5
	0.802	611.5	607.5	607.5
	0.803	613.5	603	608.5
	0.804	611	606	609.5
	0.805	610.5	606.5	609.5
	0.806	611	605	609
	0.807	609	607.5	611
	0.808	611.5	606	603.5
	0.809	611	605	609.5
	0.81	611.5	605.5	611.5
	0.811	610	603.5	608.5
	0.812	612.5	608.5	609
	0.813	610	611	611.5
	0.814	608.5	607.5	608.5
	0.815	611	608.5	608.5
	0.816	607	603	609
	0.817	616.5	609	610
	0.818	611	606	610
	0.819	608.5	608	611
	0.82	610.5	603.5	606.5
	0.821	608.5	606.5	609.5
	0.822	610	610.5	608
	0.823	608.5	609.5	611
	0.824	609	607.5	608.5
	0.825	607	607	608.5
	0.826	612.5	608.5	612
	0.827	608	608.5	612
	0.828	608.5	609.5	614.5
	0.829	609	608	612
	0.83	608.5	611.5	615.5
	0.831	605.5	607.5	613
	0.832	609.5	613.5	611
	0.833	610.5	610	610.5
	0.834	606	610	615.5
	0.835	605.5	611	612
	0.836	607	613	609.5
	0.837	608.5	608	612
	0.838	609	611	610.5
	0.839	609	608.5	613
	0.84	606.5	610.5	612.5
	0.841	608.5	613.5	614.5
	0.842	607	610.5	613.5
	0.843	603.5	610.5	615
	0.844	608.5	613.5	614.5
	0.845	608	608.5	614.5
	0.846	608.5	609.5	613.5
	0.847	608.5	608.5	614.5
	0.848	611	610	612.5
	0.849	609	610	613
	0.85	607.5	610	618.5
	0.851	608.5	612.5	614.5
	0.852	611	608.5	617.5
	0.853	606.5	611	615.5
	0.854	609.5	612.5	616.5
	0.855	609	608	616
	0.856	608	611	617.5
	0.857	611	609.5	615.5
	0.858	611	609.5	618.5
	0.859	608.5	610	617.5
	0.86	610.5	610.5	616.5
	0.861	609	608.5	618.5
	0.862	612.5	609.5	617
	0.863	609	609.5	615
	0.864	611.5	611	615.5
	0.865	611	607	615.5
	0.866	612.5	609	615
	0.867	611.5	606.5	615
	0.868	611.5	610.5	615.5
	0.869	613	608.5	614.5
	0.87	614.5	608.5	614
	0.871	614	603.5	618.5
	0.872	615	608.5	614.5
	0.873	615	608.5	613.5
	0.874	611	606.5	614
	0.875	615.5	608.5	613.5
	0.876	615.5	606.5	610
	0.877	613.5	612.5	611
	0.878	615.5	609	615
	0.879	614	609.5	617.5
	0.88	614	608.5	611
	0.881	617.5	607	613
	0.882	611	607.5	613
	0.883	617	607	610
	0.884	615.5	609	613
	0.885	612	608.5	611.5
	0.886	613	603.5	611.5
	0.887	615.5	610.5	613
	0.888	615.5	610	608.5
	0.889	615	609	611
	0.89	615	608.5	611.5
	0.891	613.5	608.5	610
	0.892	613.5	606	608.5
	0.893	615.5	606.5	608.5
	0.894	613.5	609	609
	0.895	614	611	608
	0.896	614	610.5	603.5
	0.897	614	607	609.5
	0.898	614.5	610	606.5
	0.899	614	611	608.5
	0.9	615	608.5	610
	0.901	613	611.5	603.5
	0.902	615.5	614	608.5
	0.903	613	611	606
	0.904	613.5	610	605.5
	0.905	613	614.5	603
	0.906	609	612	606
	0.907	613	610	607.5
	0.908	609.5	611.5	603.5
	0.909	611.5	612	603.5
	0.91	612.5	610	601.5
	0.911	610	612	603.5
	0.912	608.5	614.5	605.5
	0.913	612.5	613	603.5
	0.914	607.5	615.5	603
	0.915	610.5	616	605.5
	0.916	610.5	614.5	602.5
	0.917	609	612	603.5
	0.918	607	611	607.5
	0.919	610	613	607.5
	0.92	603.5	614	600
	0.921	610	618	606.5
	0.922	608.5	614	605.5
	0.923	608	615	603.5
	0.924	608.5	613.5	605.5
	0.925	607.5	615	603
	0.926	607	611	603
	0.927	605	615.5	603.5
	0.928	606.5	614.5	608
	0.929	608.5	612.5	603
	0.93	603.5	614	607.5
	0.931	609	617	609.5
	0.932	603.5	616	606
	0.933	603.5	616	610.5
	0.934	605	617	603.5
	0.935	606	613.5	610.5
	0.936	607.5	609.5	612.5
	0.937	603.5	612.5	612
	0.938	607.5	616	608
	0.939	606.5	612	609
	0.94	603.5	613	610
	0.941	605	611	611.5
	0.942	605.5	613	610
	0.943	603.5	611.5	611
	0.944	605.5	610	614.5
	0.945	603.5	610.5	614.5
	0.946	606	612	611
	0.947	603.5	614.5	612.5
	0.948	603.5	611	610.5
	0.949	603	610	614
	0.95	602.5	614	615.5
	0.951	603.5	608	610.5
	0.952	603.5	612.5	615
	0.953	606.5	610.5	617
	0.954	608	609.5	612
	0.955	605.5	607.5	616
	0.956	603.5	608.5	615.5
	0.957	603.5	611	618.5
	0.958	606.5	608.5	616.5
	0.959	605	609.5	613
	0.96	606	606.5	616
	0.961	605.5	608.5	614.5
	0.962	606	607.5	615.5
	0.963	607.5	608.5	616
	0.964	605.5	608.5	616.5
	0.965	607.5	612	612
	0.966	608	612	613.5
	0.967	605.5	610.5	615.5
	0.968	608	608.5	614
	0.969	607.5	610.5	615.5
	0.97	608	603.5	612
	0.971	607	608.5	616.5
	0.972	607.5	603.5	615
	0.973	609.5	607.5	614
	0.974	608	611	612
	0.975	608.5	608.5	612.5
	0.976	607.5	608.5	612
	0.977	608.5	605	615.5
	0.978	609.5	608.5	613
	0.979	610.5	603.5	611.5
	0.98	608.5	608	610
	0.981	607.5	603.5	615
	0.982	606.5	605.5	607.5
	0.983	610	607.5	609
	0.984	608.5	606.5	610.5
	0.985	610.5	606.5	613.5
	0.986	611	607.5	611
	0.987	609.5	608.5	607.5
	0.988	609	610	610
	0.989	611	608.5	608.5
	0.99	612	609	609
	0.991	608	609	603.5
	0.992	611	608.5	608.5
	0.993	610.5	608.5	610
	0.994	611.5	605.5	607.5
	0.995	612	608.5	611
	0.996	611.5	610.5	607.5
	0.997	611	608.5	607.5
	0.998	612.5	611	607.5
	0.999	610.5	613	605
	1	610.5	610.5	607
	1.001	606	607.5	607.5
	1.002	607.5	613.5	607.5
	1.003	613	611	607
	1.004	611	611	603.5
	1.005	611.5	610.5	606.5
	1.006	610	610	607
	1.007	612	609	609
	1.008	609	614	603.5
	1.009	609.5	611.5	605.5
	1.01	612	612.5	608
	1.011	613.5	611	609
	1.012	609	609.5	608.5
	1.013	609	609	606.5
	1.014	610	609.5	608.5
	1.015	612.5	615.5	603.5
	1.016	611.5	607.5	608.5
	1.017	609.5	614	608.5
	1.018	612	611	608.5
	1.019	609	611	608.5
	1.02	613.5	614.5	606.5
	1.021	609	611	609
	1.022	610.5	610.5	608.5
	1.023	610.5	614.5	609
	1.024	610	613	609
	1.025	610.5	614.5	608.5
	1.026	611.5	615.5	607.5
	1.027	610.5	616	608.5
	1.028	613.5	613.5	611.5
	1.029	609.5	611	609
	1.03	610.5	613.5	609.5
	1.031	612.5	610	603.5
	1.032	610.5	615	609
	1.033	610	610.5	611
	1.034	611	610.5	613
	1.035	609.5	613	612.5
	1.036	610.5	611	610.5
	1.037	612	613.5	609
	1.038	610.5	610.5	611
	1.039	612.5	612	612
	1.04	612	613.5	613.5
	1.041	614.5	610	613
	1.042	610.5	611	616
	1.043	610	610	612.5
	1.044	614	610	611
	1.045	615.5	608	612
	1.046	611	611	615.5
	1.047	611	612.5	613.5
	1.048	614	612	616
	1.049	609	612	612.5
	1.05	614	609	613
	1.051	612	610	615
	1.052	614.5	607.5	613.5
	1.053	613.5	611	616
	1.054	612.5	610	615
	1.055	616	610	615.5
	1.056	615.5	609.5	614
	1.057	612	610.5	615.5
	1.058	612	606	614.5
	1.059	614.5	610	613
	1.06	611	609.5	612.5
	1.061	613	607.5	615
	1.062	615	609.5	610
	1.063	614	608.5	614.5
	1.064	615	611	615
	1.065	615.5	603.5	612.5
	1.066	614.5	603.5	613.5
	1.067	615	608.5	611.5
	1.068	613	608.5	614
	1.069	613	607.5	613
	1.07	615	607.5	612
	1.071	614.5	607.5	610.5
	1.072	614.5	607.5	613
	1.073	612.5	610	614
	1.074	614	611	610.5
	1.075	614	606	609
	1.076	613.5	606	610.5
	1.077	613.5	607.5	614.5
	1.078	611	608.5	611.5
	1.079	611	607	611
	1.08	615.5	608	612
	1.081	615	608.5	613.5
	1.082	611.5	609	613.5
	1.083	612	609	610
	1.084	611.5	608	609.5
	1.085	615.5	608	614
	1.086	613	611	612.5
	1.087	613	609	610.5
	1.088	612	607	609.5
	1.089	615.5	608.5	609.5
	1.09	614	609.5	609
	1.091	613	606	614.5
	1.092	613	608.5	609.5
	1.093	614.5	610	612
	1.094	609.5	609	610.5
	1.095	613	611	609
	1.096	612	608.5	608.5
	1.097	610	612.5	611
	1.098	611	607.5	611.5
	1.099	610	608.5	610
	1.1	609.5	612	607
	1.101	611.5	608.5	609.5
	1.102	610.5	607.5	611
	1.103	608.5	612.5	608.5
	1.104	607	609	609
	1.105	610.5	611.5	611
	1.106	608.5	609.5	603.5
	1.107	609	610.5	608.5
	1.108	610	608.5	607.5
	1.109	610	612	610
	1.11	611	612.5	609.5
	1.111	609.5	603.5	611
	1.112	611	611	606.5
	1.113	607.5	610	609.5
	1.114	609.5	608.5	607.5
	1.115	611.5	611	612
	1.116	612	610.5	606.5
	1.117	612	610	608.5
	1.118	609.5	611	607
	1.119	612.5	611	608.5
	1.12	608.5	610	610
	1.121	610.5	609	614
	1.122	608.5	609.5	610
	1.123	609.5	610	608.5
	1.124	608.5	608	612
	1.125	610	610	610.5
	1.126	603.5	612	607.5
	1.127	608.5	608.5	609.5
	1.128	611	612.5	610
	1.129	605	612.5	611
	1.13	609	609.5	611
	1.131	605.5	610	612
	1.132	606.5	608.5	612
	1.133	608.5	610	612
	1.134	609	615.5	614.5
	1.135	609	614	612.5
	1.136	608.5	609	613
	1.137	612	612	610.5
	1.138	608	612	614
	1.139	607.5	610.5	615.5
	1.14	611	611	614
	1.141	608.5	612.5	614.5
	1.142	607	613.5	612
	1.143	611	613	614.5
	1.144	607.5	608.5	615
	1.145	607	612	614.5
	1.146	603.5	611.5	614
	1.147	603.5	610	614.5
	1.148	610.5	611	613
	1.149	605.5	612	611
	1.15	603.5	609.5	613
	1.151	608.5	612	614
	1.152	606	614	614
	1.153	603.5	614.5	612.5
	1.154	607.5	612	614.5
	1.155	608.5	610.5	611
	1.156	609	611.5	614.5
	1.157	610	610.5	618.5
	1.158	612.5	612	614
	1.159	609	610.5	610
	1.16	610.5	611.5	610.5
	1.161	610	611	613.5
	1.162	609.5	615.5	613
	1.163	609	609	615
	1.164	608.5	612	612
	1.165	610	612	614
	1.166	608.5	610	613
	1.167	611.5	615	615
	1.168	606.5	613.5	609.5
	1.169	611	614.5	614
	1.17	612	610	613.5
	1.171	611	610.5	611.5
	1.172	611	613	611.5
	1.173	608	609.5	612
	1.174	609	615.5	612.5
	1.175	611	616	610.5
	1.176	612	612	612
	1.177	608.5	614	615.5
	1.178	613	611.5	614.5
	1.179	610.5	612.5	611.5
	1.18	609	613	612
	1.181	609	606.5	612
	1.182	609	613	612.5
	1.183	612.5	612	612.5
	1.184	608.5	614	610.5
	1.185	609.5	612	613.5
	1.186	611	614	613.5
	1.187	610.5	612	609
	1.188	611	615.5	612
	1.189	610.5	612.5	612
	1.19	612.5	611	612.5
	1.191	610.5	614	611
	1.192	612.5	611	608.5
	1.193	614	612	611
	1.194	611.5	613	610.5
	1.195	607.5	613	613.5
	1.196	611	613	610.5
	1.197	611	616.5	609
	1.198	612	611	610
	1.199	606.5	611	608.5
	1.2	611.5	611.5	609
	1.201	613	611	610.5
	1.202	613	609.5	607.5
	1.203	611	614.5	608.5
	1.204	609	614	607.5
	1.205	611.5	613.5	607.5
	1.206	609	614	606
	1.207	609.5	613.5	607.5
	1.208	610	611.5	608.5
	1.209	615.5	613.5	605.5
	1.21	614	611	606.5
	1.211	613.5	612.5	606.5
	1.212	613	609	612
	1.213	611	613	605
	1.214	611	614.5	603.5
	1.215	610.5	608.5	606
	1.216	610	610	603.5
	1.217	611	613	608.5
	1.218	611.5	611	607.5
	1.219	612.5	610	605.5
	1.22	610.5	611	603.5
	1.221	611	613	608.5
	1.222	610.5	611.5	607
	1.223	612.5	614	605.5
	1.224	610	614	608.5
	1.225	614.5	612	608.5
	1.226	617	610	608.5
	1.227	613	608.5	612
	1.228	615.5	612	605.5
	1.229	615	610.5	607.5
	1.23	613.5	612	609
	1.231	614.5	611	610.5
	1.232	617.5	610	606.5
	1.233	613.5	603.5	606
	1.234	615.5	612	608
	1.235	616	605.5	607.5
	1.236	614	610.5	608.5
	1.237	614.5	611.5	610
	1.238	614	609.5	609
	1.239	615	610.5	609.5
	1.24	612	608.5	603.5
	1.241	613	610	606.5
	1.242	615.5	609	609.5
	1.243	615.5	610	611.5
	1.244	612	608	609
	1.245	614.5	606	610.5
	1.246	614.5	608.5	606
	1.247	616	607	610
	1.248	609.5	603.5	610
	1.249	614	607.5	610.5
	1.25	614.5	603.5	610.5
	1.251	611	606.5	608
	1.252	614.5	609	610
	1.253	612.5	603.5	611.5
	1.254	612	603.5	607.5
	1.255	609	605.5	611
	1.256	611	609	610
	1.257	610.5	605.5	609
	1.258	610	609	612.5
	1.259	613.5	606.5	609
	1.26	611	606	611
	1.261	612.5	607	612.5
	1.262	615	605.5	612
	1.263	608.5	610	612.5
	1.264	609.5	607.5	613.5
	1.265	610	607	610.5
	1.266	608.5	606.5	611
	1.267	607.5	607.5	615.5
	1.268	610.5	603.5	611.5
	1.269	609	609.5	610.5
	1.27	611	607	611
	1.271	610	605.5	612
	1.272	609	606	609
	1.273	614	607.5	611.5
	1.274	611	607.5	612
	1.275	609	603.5	613.5
	1.276	611	603.5	608.5
	1.277	610	607.5	614
	1.278	607.5	606	610
	1.279	610	606	610
	1.28	610.5	605	610.5
	1.281	613	601.5	613.5
	1.282	615.5	608.5	608.5
	1.283	612	607	615.5
	1.284	614.5	603.5	609
	1.285	609.5	607.5	610
	1.286	610	602	613.5
	1.287	608.5	605.5	610.5
	1.288	606.5	608.5	613
	1.289	608.5	606	612
	1.29	609.5	607.5	611
	1.291	610.5	609.5	611.5
	1.292	612.5	603.5	606
	1.293	609.5	602.5	609.5
	1.294	609.5	607.5	612
	1.295	608.5	605.5	610
	1.296	608.5	603.5	608.5
	1.297	606	609.5	612
	1.298	609.5	610	610.5
	1.299	611.5	608.5	612
	1.3	612	608	609
	1.301	612.5	605.5	612.5
	1.302	610.5	605.5	609
	1.303	612.5	608.5	610
	1.304	613	608.5	610.5
	1.305	612	608	609
	1.306	613.5	607.5	610.5
	1.307	614.5	608.5	611.5
	1.308	611	606.5	610
	1.309	610.5	605.5	610
	1.31	614	606	613
	1.311	613	606.5	607
	1.312	613.5	605.5	608.5
	1.313	615.5	605.5	615
	1.314	615.5	611	611
	1.315	613	609	611
	1.316	614	609.5	614
	1.317	614.5	608	610.5
	1.318	615.5	608.5	612
	1.319	616	608.5	610.5
	1.32	615	606	610
	1.321	614	605.5	614
	1.322	617.5	608	613
	1.323	614	610.5	611
	1.324	618.5	607	613.5
	1.325	616.5	607	611.5
	1.326	618	607.5	611
	1.327	620	608.5	616
	1.328	616.5	609	612.5
	1.329	618.5	608.5	616.5
	1.33	621	609	612.5
	1.331	621	607	613.5
	1.332	615.5	609	615
	1.333	621	607.5	613
	1.334	615.5	610.5	613.5
	1.335	618.5	608	613.5
	1.336	618.5	606.5	613
	1.337	618.5	611	613
	1.338	617	608	615
	1.339	618	607.5	615
	1.34	614.5	609.5	606
	1.341	618.5	610	611.5
	1.342	616.5	611	612
	1.343	618.5	614	609
	1.344	615	609	609.5
	1.345	614.5	610	609
	1.346	616.5	611	611
	1.347	615.5	609	613
	1.348	614	611	615.5
	1.349	615.5	614	613
	1.35	613	613.5	610.5
	1.351	614.5	608.5	611.5
	1.352	613	612	609
	1.353	613	612	612.5
	1.354	614.5	609.5	612.5
	1.355	612	613	614
	1.356	613.5	608.5	611.5
	1.357	612	614	613
	1.358	616	610	611
	1.359	613	611	611.5
	1.36	615	612	613.5
	1.361	612.5	613	614
	1.362	609.5	615	609
	1.363	611.5	612.5	609
	1.364	612	612.5	611
	1.365	612	614	612.5
	1.366	615	614	613
	1.367	613.5	610.5	613
	1.368	614.5	613	611
	1.369	608.5	615	615.5
	1.37	606.5	615	614
	1.371	610.5	615.5	613
	1.372	612	613	610.5
	1.373	610	617.5	614.5
	1.374	608.5	614	613
	1.375	610.5	615.5	610.5
	1.376	611.5	614.5	616
	1.377	607	617	615
	1.378	608	614	614
	1.379	608.5	612.5	613.5
	1.38	607	615	611
	1.381	611	613	612
	1.382	605.5	613	610.5
	1.383	606.5	615.5	613
	1.384	605.5	613	615
	1.385	603.5	617	613.5
	1.386	603.5	614	612
	1.387	608	614	613.5
	1.388	603.5	615	612.5
	1.389	603	613.5	612
	1.39	602	613.5	610
	1.391	603.5	615	615.5
	1.392	603.5	615.5	617
	1.393	602.5	612.5	614
	1.394	605	615	611.5
	1.395	601.5	610.5	610.5
	1.396	603.5	611	614
	1.397	605.5	615	609.5
	1.398	602.5	614	615
	1.399	602	612	609
	1.4	603.5	610	612.5
	1.401	608	612	610
	1.402	607.5	610	609
	1.403	603.5	608.5	612.5
	1.404	603.5	610	609
	1.405	606.5	613	608
	1.406	607.5	614.5	609
	1.407	607.5	612.5	610.5
	1.408	610.5	612	608.5
	1.409	609	609.5	614
	1.41	606.5	609.5	608.5
	1.411	607.5	608.5	609.5
	1.412	611.5	611	608.5
	1.413	609.5	611	609.5
	1.414	610.5	608.5	609
	1.415	609	609.5	607
	1.416	610	608.5	608.5
	1.417	612	608.5	609.5
	1.418	614	611.5	610
	1.419	613	611.5	609
	1.42	615	607	606
	1.421	614.5	609.5	608
	1.422	614	609	609.5
	1.423	617.5	610.5	605.5
	1.424	615	609.5	608.5
	1.425	616.5	608.5	607
	1.426	618.5	609	607
	1.427	617.5	610	603.5
	1.428	618.5	608.5	603.5
	1.429	615.5	603.5	608
	1.43	618.5	607.5	603.5
	1.431	617	608	607.5
	1.432	622	601.5	605
	1.433	620	607	609
	1.434	618.5	607.5	607
	1.435	618.5	607.5	605.5
	1.436	620.5	611.5	605.5
	1.437	622	608.5	607
	1.438	621.5	612	607.5
	1.439	618.5	606	610.5
	1.44	618.5	606.5	606.5
	1.441	622	607	605.5
	1.442	617	609	602.5
	1.443	622	609.5	607.5
	1.444	622.5	609.5	607.5
	1.445	618.5	605.5	603.5
	1.446	622	603.5	605.5
	1.447	621.5	610.5	603.5
	1.448	618.5	609.5	603.5
	1.449	621.5	612	605.5
	1.45	618.5	609	603.5
	1.451	618.5	611	603.5
	1.452	614.5	609	606
	1.453	618.5	609.5	608.5
	1.454	618.5	609	605.5
	1.455	615.5	607.5	609
	1.456	617.5	611	605
	1.457	617	613	606
	1.458	616.5	611	605.5
	1.459	615	610	603.5
	1.46	615.5	612.5	603.5
	1.461	615.5	612	606.5
	1.462	615	613	609
	1.463	613	612.5	607.5
	1.464	614	614	609
	1.465	615	608.5	608.5
	1.466	614	610.5	607.5
	1.467	612	614	606
	1.468	614.5	611	607.5
	1.469	613	614	605.5
	1.47	610.5	615	609
	1.471	611.5	612	608.5
	1.472	610	613	607.5
	1.473	609	615.5	613
	1.474	608	615	612
	1.475	612	615.5	610
	1.476	610.5	616	610
	1.477	608.5	613.5	609.5
	1.478	608.5	611	611.5
	1.479	610	611.5	608.5
	1.48	608.5	615	613
	1.481	606	611.5	608.5
	1.482	610.5	613	612
	1.483	607.5	614	614.5
	1.484	603.5	616.5	611
	1.485	608	615	611
	1.486	603.5	615.5	614
	1.487	603.5	614	614.5
	1.488	608.5	615	613
	1.489	603	615.5	615.5
	1.49	606	616	618.5
	1.491	603.5	612.5	616.5
	1.492	601.5	613	617.5
	1.493	602.5	617.5	618.5
	1.494	601.5	614.5	618
	1.495	603	614	617
	1.496	602.5	613	615
	1.497	606	614.5	618.5
	1.498	605.5	613.5	617.5
	1.499	603.5	614	615.5
	1.5	607	612	618.5
	1.501	605.5	615	613.5
	1.502	603.5	611	618.5
	1.503	607	618.5	615
	1.504	610	615.5	618.5
	1.505	614	613	614
	1.506	608.5	616	616.5
	1.507	609	611	618.5
	1.508	612	613	617
	1.509	613.5	614.5	614.5
	1.51	614	614	616
	1.511	610.5	617.5	615.5
	1.512	613.5	615	616.5
	1.513	612	616.5	616.5
	1.514	615.5	615.5	615
	1.515	615.5	615.5	614
	1.516	613	614.5	615
	1.517	615.5	615.5	613
	1.518	614	615	617
	1.519	617	614	615.5
	1.52	623	614.5	612.5
	1.521	621	614.5	613
	1.522	623	611.5	615
	1.523	625.5	617.5	612.5
	1.524	625.5	613	611
	1.525	625.5	615.5	611.5
	1.526	626.5	614.5	611
	1.527	629	614.5	614.5
	1.528	629.5	614.5	610.5
	1.529	630	614	610
	1.53	632.5	615	609.5
	1.531	631.5	618.5	612
	1.532	630	618	612
	1.533	633	615	607.5
	1.534	636	616.5	607.5
	1.535	635.5	615.5	612.5
	1.536	633.5	617.5	610.5
	1.537	636	618.5	608.5
	1.538	638	618.5	610
	1.539	635	618.5	610.5
	1.54	635	618.5	607.5
	1.541	633	617	608
	1.542	636	620.5	606
	1.543	633.5	621.5	606
	1.544	641	622	606
	1.545	634.5	622	607
	1.546	638.5	622	607.5
	1.547	638.5	618.5	603.5
	1.548	635	624	605.5
	1.549	638	621	603.5
	1.55	633	622.5	603.5
	1.551	639.5	627.5	608.5
	1.552	637.5	625.5	603.5
	1.553	635	624.5	603.5
	1.554	638	622	607.5
	1.555	636	625.5	606.5
	1.556	635	626.5	605.5
	1.557	636	625	603.5
	1.558	635.5	624	603.5
	1.559	636.5	627	607
	1.56	635	627.5	603.5
	1.561	633	628	603.5
	1.562	633.5	628	603
	1.563	633.5	624.5	603.5
	1.564	635	627.5	602.5
	1.565	632	630.5	606
	1.566	630.5	626	607.5
	1.567	630.5	629	602
	1.568	630	628.5	608.5
	1.569	625.5	633.5	603.5
	1.57	625.5	630.5	603.5
	1.571	628	629	607
	1.572	629	634.5	608
	1.573	625.5	632.5	605.5
	1.574	625	631.5	603.5
	1.575	628	627	606
	1.576	625	630	608.5
	1.577	628	630	606
	1.578	629	631	609
	1.579	625	629.5	609.5
	1.58	623	630.5	607.5
	1.581	623.5	631.5	608
	1.582	622.5	629.5	609
	1.583	622.5	630.5	612.5
	1.584	618.5	628.5	611
	1.585	621	629.5	611
	1.586	617	631.5	611.5
	1.587	622	631	613
	1.588	620	631.5	616.5
	1.589	617.5	629	611
	1.59	616.5	630.5	615.5
	1.591	614	628.5	613.5
	1.592	614	628.5	616.5
	1.593	615.5	629	617
	1.594	617	631	616.5
	1.595	613.5	629	615
	1.596	616.5	626	620.5
	1.597	616	627.5	617
	1.598	614	628.5	616.5
	1.599	613.5	629.5	618.5
	1.6	610.5	629	621
	1.601	611	629.5	618
	1.602	613	630.5	618.5
	1.603	610.5	628	618.5
	1.604	612.5	629	621.5
	1.605	610.5	630	622.5
	1.606	609.5	629	618.5
	1.607	610	628	622.5
	1.608	609.5	625	620
	1.609	609.5	628.5	618.5
	1.61	607.5	629	618.5
	1.611	608.5	625	618.5
	1.612	611	628.5	621.5
	1.613	613	629	623
	1.614	609	630.5	618.5
	1.615	609.5	631.5	622
	1.616	606.5	633.5	618
	1.617	608	631.5	618.5
	1.618	609.5	630.5	622
	1.619	609.5	628.5	621
	1.62	611.5	630.5	618.5
	1.621	610	635.5	621
	1.622	611	632.5	618.5
	1.623	607.5	629	617
	1.624	610.5	631.5	618.5
	1.625	613	630	618.5
	1.626	609.5	630	622
	1.627	612.5	629.5	617.5
	1.628	613	632.5	617
	1.629	613.5	632	618.5
	1.63	613	634.5	620.5
	1.631	612.5	629	621
	1.632	611.5	633.5	618
	1.633	616	635.5	618.5
	1.634	612.5	633.5	614
	1.635	617.5	634.5	615
	1.636	612.5	636	616
	1.637	618	637.5	617
	1.638	616.5	633.5	618.5
	1.639	621	633.5	616
	1.64	617.5	632	617
	1.641	616.5	635.5	618.5
	1.642	618.5	635.5	615
	1.643	615.5	637	615.5
	1.644	617	636	615.5
	1.645	618	636.5	616
	1.646	617.5	638	618
	1.647	615	636	616.5
	1.648	618.5	636.5	618
	1.649	615	639.5	613
	1.65	617.5	640.5	618
	1.651	615.5	633.5	617
	1.652	618	636	614.5
	1.653	617	636	615.5
	1.654	615	637	615.5
	1.655	614.5	633.5	620.5
	1.656	616	640	616.5
	1.657	615.5	635.5	616.5
	1.658	615	635	616.5
	1.659	615.5	632	618.5
	1.66	615	637	618
	1.661	613.5	633.5	616
	1.662	614	633	616
	1.663	610.5	632.5	615
	1.664	612.5	633.5	618.5
	1.665	610.5	634.5	617.5
	1.666	611.5	632.5	617
	1.667	612	632	621
	1.668	606.5	630	617
	1.669	606	626.5	615.5
	1.67	607	627.5	618.5
	1.671	605.5	627.5	615.5
	1.672	603.5	628	618.5
	1.673	603.5	627	618.5
	1.674	603.5	624.5	618.5
	1.675	602	622.5	618
	1.676	599.5	625	620.5
	1.677	598	623.5	617.5
	1.678	598	623	621.5
	1.679	598.5	622.5	622
	1.68	599	620	618.5
	1.681	595	615.5	621
	1.682	593	617	618.5
	1.683	594	616	618.5
	1.684	593.5	615.5	618
	1.685	590	611	621
	1.686	588.5	614	618
	1.687	588.5	610	622.5
	1.688	587	609	624
	1.689	586.5	607.5	623
	1.69	583.5	603.5	624
	1.691	586.5	605	622.5
	1.692	582.5	601.5	624
	1.693	578	600	625.5
	1.694	581	598.5	622.5
	1.695	580	598	625.5
	1.696	577.5	597	628
	1.697	574	590.5	625
	1.698	577	591.5	628.5
	1.699	573.5	588.5	625.5
	1.7	568	588	624
	1.701	571.5	585.5	628
	1.702	566.5	587.5	625.5
	1.703	565.5	584	627
	1.704	563.5	581.5	628
	1.705	561.5	579	629.5
	1.706	562.5	579	624
	1.707	562	576.5	627
	1.708	559	575.5	629
	1.709	556	574	624.5
	1.71	557	570	628
	1.711	553.5	570	630.5
	1.712	554	569	627.5
	1.713	551.5	565.5	625
	1.714	550	562.5	626
	1.715	547	562.5	631
	1.716	543.5	559	629
	1.717	541.5	558.5	628.5
	1.718	539	556	631
	1.719	540.5	553	630
	1.72	535.5	551.5	629
	1.721	534	549.5	632.5
	1.722	532	547	632
	1.723	529	549	630.5
	1.724	526.5	542	629.5
	1.725	524.5	542.5	629.5
	1.726	525	535.5	629
	1.727	520.5	537	630
	1.728	521.5	533.5	631
	1.729	517.5	528.5	630.5
	1.73	515.5	526.5	633
	1.731	515.5	526.5	632.5
	1.732	512.5	524.5	635
	1.733	507.5	521	629.5
	1.734	510.5	519.5	628.5
	1.735	503.5	515.5	631
	1.736	504	511.5	631.5
	1.737	502.5	508	634.5
	1.738	495.5	508	633
	1.739	501	503	630.5
	1.74	495.5	500.5	634.5
	1.741	493.5	496	633
	1.742	494.5	495	629
	1.743	491.5	490.5	630
	1.744	490.5	488	630.5
	1.745	487	486	630.5
	1.746	484.5	481.5	633.5
	1.747	486.5	476.5	631
	1.748	481	478.5	629
	1.749	478.5	473	630
	1.75	479.5	470.5	630.5
	1.751	478.5	467.5	629.5
	1.752	474.5	466	630
	1.753	471.5	465	628.5
	1.754	474	462	626.5
	1.755	471.5	457	629
	1.756	467.5	457.5	627.5
	1.757	465.5	454.5	632.5
	1.758	462	454.5	629
	1.759	465	451.5	627.5
	1.76	460.5	451	628
	1.761	454.5	449	632.5
	1.762	452.5	451	628.5
	1.763	454	447.5	629.5
	1.764	449	444.5	630
	1.765	447.5	449	632.5
	1.766	443.5	441	626
	1.767	442	444.5	628.5
	1.768	434.5	441	630.5
	1.769	432.5	439.5	629
	1.77	433	441	625.5
	1.771	429.5	440	630
	1.772	430	437.5	628.5
	1.773	422	438	627.5
	1.774	419	437.5	625
	1.775	420.5	433.5	626
	1.776	415	430	626
	1.777	413.5	429.5	626
	1.778	407	432	622
	1.779	408.5	427.5	623.5
	1.78	402	424.5	623
	1.781	400	429	622
	1.782	393	423	625
	1.783	393	421.5	622
	1.784	386.5	417.5	622.5
	1.785	381	418.5	618.5
	1.786	380	416.5	617.5
	1.787	377	413	618.5
	1.788	372.5	411.5	618
	1.789	369.5	408.5	616.5
	1.79	365.5	405	616.5
	1.791	362	403	614
	1.792	360.5	399.5	614.5
	1.793	351	395.5	616
	1.794	350.5	393.5	614
	1.795	346	387.5	613.5
	1.796	343	385	613
	1.797	337	383	611.5
	1.798	334	379.5	610.5
	1.799	329	369.5	610.5
	1.8	328	369	608
	1.801	322.5	363.5	612
	1.802	316.5	361.5	607.5
	1.803	315	353.5	608.5
	1.804	311	351.5	607
	1.805	306.5	342.5	603.5
	1.806	304.5	340	603.5
	1.807	298.5	332	600
	1.808	298	328.5	603
	1.809	292.5	322	600.5
	1.81	287	318	599.5
	1.811	285	314.5	599.5
	1.812	285	305.5	596
	1.813	273.5	300.5	599
	1.814	273.5	295.5	598.5
	1.815	272.5	287.5	595.5
	1.816	268	283.5	597
	1.817	265	276	594
	1.818	263.5	273	592
	1.819	259	269.5	588.5
	1.82	259.5	258	592.5
	1.821	249.5	255.5	588.5
	1.822	251	249	583.5
	1.823	252.5	242.5	586.5
	1.824	245.5	233.5	585.5
	1.825	241.5	234	584
	1.826	240	225.5	578.5
	1.827	240.5	223.5	578
	1.828	235.5	218.5	578
	1.829	235	214	579
	1.83	233	209.5	574
	1.831	232.5	205.5	574
	1.832	227	202.5	571
	1.833	229.5	193.5	569.5
	1.834	226.5	193.5	569
	1.835	224	188	564.5
	1.836	224	183.5	564.5
	1.837	222.5	181.5	559
	1.838	221.5	177	556.5
	1.839	219.5	171.5	555.5
	1.84	219	170	554
	1.841	221.5	169.5	550
	1.842	219	164	544
	1.843	216.5	162	542.5
	1.844	215	158	539
	1.845	218.5	157	536.5
	1.846	215	153.5	535
	1.847	216	150	528.5
	1.848	216	147	525.5
	1.849	215	149.5	521.5
	1.85	211.5	149	521
	1.851	213	145	512.5
	1.852	212	143.5	511
	1.853	211.5	142.5	501.5
	1.854	212.5	138.5	501
	1.855	212	142	493.5
	1.856	213	141.5	489
	1.857	207.5	139	484.5
	1.858	209.5	140	479.5
	1.859	212.5	140.5	476.5
	1.86	212	139.5	465.5
	1.861	214	138.5	459.5
	1.862	212.5	137.5	454
	1.863	212.5	144.5	449
	1.864	211.5	142	441.5
	1.865	210	146.5	434
	1.866	209	144.5	426.5
	1.867	209.5	145.5	419
	1.868	212	147.5	415
	1.869	214.5	150	411.5
	1.87	212.5	148	402
	1.871	211	151	394.5
	1.872	211	156.5	388
	1.873	213.5	155	380
	1.874	214	157	377
	1.875	214.5	162	369
	1.876	212.5	163	360
	1.877	215.5	166.5	360.5
	1.878	214.5	167.5	350.5
	1.879	216	168.5	344.5
	1.88	217	173.5	342
	1.881	218.5	175	334.5
	1.882	214.5	178.5	324.5
	1.883	220.5	179	326
	1.884	222	185	323.5
	1.885	221	187	317.5
	1.886	222.5	187	313.5
	1.887	222	187.5	308.5
	1.888	227.5	192	307.5
	1.889	227.5	193.5	302.5
	1.89	231	197	299.5
	1.891	227.5	200	293.5
	1.892	233.5	198	288
	1.893	236	196.5	287
	1.894	237	202	283
	1.895	234.5	204.5	282
	1.896	236	203	278.5
	1.897	239	204.5	274
	1.898	242	208.5	275
	1.899	240	212.5	273
	1.9	240	208	266.5
	1.901	248.5	211.5	268
	1.902	246	214	260
	1.903	246	211.5	263.5
	1.904	247	218.5	260.5
	1.905	249	216	257.5
	1.906	250	216.5	257.5
	1.907	253	220.5	252
	1.908	258	223.5	255
	1.909	256.5	226	254
	1.91	259	227.5	257
	1.911	260.5	233.5	253.5
	1.912	264	237.5	254
	1.913	261	239.5	255
	1.914	263	244	253
	1.915	265	248	247
	1.916	269	247.5	246
	1.917	271	250.5	246
	1.918	275	254.5	243.5
	1.919	271.5	257.5	239.5
	1.92	277	266.5	239
	1.921	280	267	236
	1.922	283	278.5	234.5
	1.923	285	281.5	233.5
	1.924	288	289.5	236
	1.925	286	294.5	234
	1.926	288	301.5	226.5
	1.927	287	306.5	225.5
	1.928	293.5	310	225
	1.929	296.5	315	221.5
	1.93	302.5	317	217
	1.931	304.5	323	217
	1.932	308	329.5	214
	1.933	314	335.5	212.5
	1.934	320.5	339.5	209
	1.935	321.5	344.5	207.5
	1.936	323.5	349.5	204
	1.937	327.5	354	201.5
	1.938	332	358	200
	1.939	336.5	358	200.5
	1.94	341	364	195
	1.941	342	368.5	191
	1.942	348	372.5	192
	1.943	353.5	373.5	186.5
	1.944	355.5	376.5	185
	1.945	356.5	382.5	185
	1.946	360.5	386.5	182
	1.947	361.5	390	179
	1.948	369	395.5	180.5
	1.949	368	399	173
	1.95	370.5	399	176
	1.951	375.5	405.5	173.5
[truncated: 13,048 more rows]

## Sheet: J
DataTypeVer2.0	Time	Fz	Fz	Fz
[truncated: 15,005 more rows]
