# Supplementary material for: Effects of high-intensity sprint exercise on neuromuscular function in sprinters: the countermovement jump as a fatigue assessment tool
Source: PeerJ. 2024 May 29;12:e17443. doi: 10.7717/peerj.17443 (PMC11143976; doi:10.7717/peerj.17443)
Supplement: Supplemental Information 2 — The data for each trial for each participant (A–J). [file peerj-12-17443-s002.xlsx]

## Sheet: A
DataTypeVer2.0	Time	Fz	Fz	Fz
NumberOfData		8000	8000	8000
PreTriggerData		0	0	0
SamplingTime[ms]		1	1	1
DataLabel		H1:CMJ	H2:CMJ	H3:CMJ
DataUnit	sec	N	N	N
	0	553.5	574.5	550
	0.001	551	574	549.5
	0.002	554	575.5	546
	0.003	550	575.5	548
	0.004	557.5	574.5	551
	0.005	554	574	551
	0.006	552.5	572.5	547.5
	0.007	552.5	569.5	549
	0.008	553	571	548.5
	0.009	554	572.5	552.5
	0.01	552.5	573	550.5
	0.011	552	571.5	554
	0.012	552	569	549.5
	0.013	553	569	557.5
	0.014	554	572.5	554
	0.015	554	571	550
	0.016	553.5	569	550
	0.017	552.5	571.5	554
	0.018	557.5	569	554
	0.019	552	562.5	552.5
	0.02	559.5	566.5	551.5
	0.021	559	569	554
	0.022	561	568	554
	0.023	554	561.5	554
	0.024	554	565.5	551.5
	0.025	554	567.5	553
	0.026	553.5	561	553.5
	0.027	556	566.5	552.5
	0.028	554	562.5	554
	0.029	554	564	554
	0.03	554	560	554
	0.031	554	567.5	554
	0.032	554	563.5	550
	0.033	557	562	554
	0.034	561	560.5	551.5
	0.035	559	560.5	554
	0.036	558	561	552.5
	0.037	558	559	554
	0.038	560	561.5	554
	0.039	556	562.5	554
	0.04	560	560.5	557
	0.041	559.5	559.5	554
	0.042	556.5	556.5	553
	0.043	559.5	558.5	554
	0.044	554	559.5	554
	0.045	561	558	558.5
	0.046	560	554	557
	0.047	554	554	554
	0.048	560	558	554
	0.049	559.5	558.5	554
	0.05	559	553	554
	0.051	558	554	554
	0.052	554	554	554
	0.053	557.5	554	558
	0.054	554	553	558.5
	0.055	557.5	551	557
	0.056	554	553	554
	0.057	554	552	558.5
	0.058	558	549.5	559.5
	0.059	557	546.5	557
	0.06	558.5	550	561
	0.061	554	551	557
	0.062	554	547.5	554
	0.063	557.5	550	559.5
	0.064	553	549	558
	0.065	554	545.5	557.5
	0.066	554	547	563
	0.067	554	544.5	557.5
	0.068	552.5	547	561
	0.069	551.5	548	558.5
	0.07	554	546.5	554
	0.071	554	548.5	557
	0.072	552.5	548	558.5
	0.073	550.5	545	560.5
	0.074	549	544.5	560.5
	0.075	554	542	561.5
	0.076	553	545	563
	0.077	548.5	542	563
	0.078	548	542.5	560.5
	0.079	547	543	561.5
	0.08	549	541	566
	0.081	547	545	564
	0.082	547.5	543	561.5
	0.083	547.5	541.5	562.5
	0.084	548	542	565.5
	0.085	546.5	544	562.5
	0.086	547	541.5	563.5
	0.087	543.5	544	563.5
	0.088	546	544	563.5
	0.089	548.5	544	567
	0.09	544.5	542.5	564.5
	0.091	544.5	545	567.5
	0.092	539	544	563.5
	0.093	543	545.5	564.5
	0.094	542	540	563.5
	0.095	542.5	542	567.5
	0.096	543	543.5	565.5
	0.097	544	546	564.5
	0.098	541	543.5	569
	0.099	541	543	564.5
	0.1	541	544	567.5
	0.101	540.5	545	564
	0.102	539.5	547	566.5
	0.103	542	546.5	567.5
	0.104	542	545.5	568.5
	0.105	543	544.5	568.5
	0.106	541.5	549.5	567.5
	0.107	537	549.5	569
	0.108	539.5	548.5	566.5
	0.109	539.5	547.5	567
	0.11	539	549	564.5
	0.111	540	547.5	564
	0.112	543.5	547	564
	0.113	540	545.5	567.5
	0.114	538.5	548	566
	0.115	534.5	548.5	567.5
	0.116	538	554	565.5
	0.117	537	548	568
	0.118	539.5	552.5	564.5
	0.119	537.5	553	563
	0.12	540.5	548	562
	0.121	540.5	553	563.5
	0.122	539.5	554	564
	0.123	540	554	565.5
	0.124	535.5	554	563
	0.125	539.5	552	564
	0.126	539.5	551.5	564
	0.127	540	553	564.5
	0.128	539	551	566
	0.129	541	553	563.5
	0.13	544	554	560.5
	0.131	540	554	562
	0.132	541.5	554	560.5
	0.133	542	554	560.5
	0.134	540	554	559
	0.135	545	558.5	562.5
	0.136	549.5	557	559
	0.137	543.5	554	559.5
	0.138	545	554	557.5
	0.139	545	554	556.5
	0.14	545	560	561.5
	0.141	547	554	554
	0.142	548	561.5	558
	0.143	546.5	558.5	554
	0.144	547.5	561.5	554
	0.145	549.5	558.5	554
	0.146	549	559	554
	0.147	549.5	562	557
	0.148	552	560.5	554
	0.149	552	558.5	554
	0.15	553	560.5	553
	0.151	552.5	561.5	557.5
	0.152	553.5	561.5	553.5
	0.153	554	557	554
	0.154	552.5	560.5	554
	0.155	554	563.5	552
	0.156	557.5	559	549
	0.157	557.5	560	553
	0.158	554	564.5	550.5
	0.159	554	564	554
	0.16	554	562.5	554
	0.161	558.5	564.5	552.5
	0.162	558	561	551.5
	0.163	563	560.5	551.5
	0.164	563.5	558.5	552.5
	0.165	560	560	551
	0.166	559.5	556.5	550
	0.167	562	560.5	550
	0.168	563.5	560.5	552
	0.169	563	557.5	547
	0.17	562	560.5	551.5
	0.171	562.5	560.5	549
	0.172	563	554	553
	0.173	565	558	552.5
	0.174	567	557	550
	0.175	567	554	547
	0.176	567.5	554	550.5
	0.177	568.5	554	551.5
	0.178	569	554	549.5
	0.179	571	557	553.5
	0.18	570.5	554	549.5
	0.181	567.5	553	552.5
	0.182	568	557	553
	0.183	571	554	551.5
	0.184	569	551	548.5
	0.185	565.5	551.5	550.5
	0.186	569	552.5	547
	0.187	571	554	549
	0.188	568.5	552.5	547.5
	0.189	568.5	554	546
	0.19	567.5	554	548.5
	0.191	569	549.5	548
	0.192	571	554	549.5
	0.193	570	553	549
	0.194	571.5	551.5	546.5
	0.195	571.5	551.5	550
	0.196	572.5	553	549
	0.197	568	552.5	550.5
	0.198	571	554	550.5
	0.199	571.5	549	551
	0.2	570.5	553	550.5
	0.201	569	552.5	552.5
	0.202	568.5	551	552
	0.203	573.5	557	550
	0.204	571	554	551.5
	0.205	569	554	550
	0.206	567	553.5	551.5
	0.207	570.5	553.5	546
	0.208	572	551.5	549
	0.209	572	553	546.5
	0.21	569	554	550
	0.211	565	552	550.5
	0.212	569	554	549.5
	0.213	568	554	546.5
	0.214	566.5	553	551
	0.215	567.5	553	548.5
	0.216	568	550	546.5
	0.217	569	554	548.5
	0.218	568	553	549.5
	0.219	566	554	544
	0.22	567.5	551.5	549
	0.221	566.5	553	549
	0.222	567	554	552.5
	0.223	569	558	550
	0.224	565.5	558.5	549
	0.225	566.5	554	549.5
	0.226	564	554	549.5
	0.227	565	554	549
	0.228	562	554	549
	0.229	565.5	557	547
	0.23	568	553.5	549.5
	0.231	566	553.5	549
	0.232	566	556.5	550.5
	0.233	560	559	547
	0.234	565.5	553.5	549
	0.235	565.5	557	549.5
	0.236	561.5	554	547
	0.237	564	552.5	547
	0.238	561	554	547.5
	0.239	560.5	557.5	550.5
	0.24	564.5	558	553
	0.241	565	554	547
	0.242	561	554	550
	0.243	561.5	554	548
	0.244	561.5	560	550.5
	0.245	560.5	554	549
	0.246	561.5	560	548.5
	0.247	561	554	551
	0.248	560	554	551
	0.249	559	554	550.5
	0.25	560.5	554	554
	0.251	558	554	552.5
	0.252	563	554	548.5
	0.253	560.5	558	550.5
	0.254	557.5	553.5	549.5
	0.255	554	559.5	557
	0.256	560	554	552.5
	0.257	557	554	554
	0.258	554	552.5	554
	0.259	554	554	553
	0.26	553	554	552
	0.261	558.5	557.5	553
	0.262	554	554	554
	0.263	553.5	554	553
	0.264	554	554	554
	0.265	552.5	552.5	554
	0.266	554	554	554
	0.267	552.5	554	554
	0.268	549	554	553.5
	0.269	551.5	549.5	554
	0.27	547.5	554	557
	0.271	553	559	554
	0.272	550	550	559
	0.273	551	554	557
	0.274	551.5	554	558
	0.275	550	554	554
	0.276	547	554	557
	0.277	545.5	554	558
	0.278	549	553.5	554
	0.279	548	553.5	554
	0.28	547	554	560
	0.281	545.5	552.5	558
	0.282	547	554	558.5
	0.283	545.5	554	557.5
	0.284	548	554	554
	0.285	548	554	554
	0.286	547	551	559
	0.287	545.5	554	556.5
	0.288	549	554	558
	0.289	550	552	554
	0.29	547	554	561
	0.291	546.5	554	559
	0.292	546.5	551.5	560.5
	0.293	547.5	553.5	557
	0.294	545	560.5	554
	0.295	547	553.5	554
	0.296	546	554	561
	0.297	542.5	554	554
	0.298	545.5	552.5	554
	0.299	546.5	552	554
	0.3	543	554	560
	0.301	546.5	554	557
	0.302	542	554	560.5
	0.303	543.5	554	560.5
	0.304	546.5	558	558.5
	0.305	543.5	552	557.5
	0.306	545	558	557.5
	0.307	545	554	554
	0.308	544.5	554	554
	0.309	546	558	557.5
	0.31	545	554	556.5
	0.311	546	559	556.5
	0.312	550.5	559.5	558
	0.313	544.5	554	559
	0.314	545.5	554	557
	0.315	545.5	559.5	560
	0.316	545	559	554
	0.317	546	559.5	559
	0.318	547	560.5	559
	0.319	545	554	554
	0.32	543.5	554	560
	0.321	544.5	554	556.5
	0.322	549.5	558	558.5
	0.323	547.5	554	558
	0.324	547	553.5	561
	0.325	547.5	560	554
	0.326	544.5	554	560
	0.327	547	554	559
	0.328	548	557	554
	0.329	547.5	559.5	554
	0.33	550.5	554	554
	0.331	547	558.5	558.5
	0.332	545	560	554
	0.333	546	557	553.5
	0.334	550.5	554	554
	0.335	543	556.5	554
	0.336	547	559	552
	0.337	548.5	554	554
	0.338	550.5	553.5	554
	0.339	549.5	554	553.5
	0.34	548.5	558	554
	0.341	551	554	554
	0.342	548.5	554	549.5
	0.343	551.5	554	553.5
	0.344	550.5	554	554
	0.345	547	553	552.5
	0.346	550	554	552.5
	0.347	549	554	554
	0.348	547	554	550
	0.349	550.5	554	552
	0.35	550	554	554
	0.351	557.5	553	553
	0.352	549.5	554	553
	0.353	554	553	548.5
	0.354	551.5	552.5	553.5
	0.355	551	554	552.5
	0.356	551.5	552	552.5
	0.357	552.5	554	553.5
	0.358	554	553.5	552
	0.359	554	554	553.5
	0.36	554	552	547
	0.361	554	552	551
	0.362	554	554	550
	0.363	556	551.5	550.5
	0.364	554	553	549.5
	0.365	556.5	553.5	549.5
	0.366	559.5	554	553
	0.367	560.5	553.5	548.5
	0.368	557.5	550.5	550
	0.369	557	553.5	551.5
	0.37	554	554	551
	0.371	558.5	554	550.5
	0.372	558	548.5	549.5
	0.373	558.5	551	548.5
	0.374	558	553.5	547.5
	0.375	558.5	553.5	548
	0.376	561	549.5	551.5
	0.377	560.5	553	550
	0.378	563	554	549
	0.379	558	550	547
	0.38	562.5	550	547
	0.381	558.5	551.5	546.5
	0.382	562.5	554	550
	0.383	558	553.5	549
	0.384	560	549	549
	0.385	559.5	553.5	550
	0.386	557	554	548
	0.387	558	554	546.5
	0.388	561.5	550.5	546.5
	0.389	560.5	554	549
	0.39	560.5	554	554
	0.391	560	554	549
	0.392	564	554	545.5
	0.393	560.5	557.5	545.5
	0.394	563.5	554	545.5
	0.395	561	551	546.5
	0.396	561.5	552	541
	0.397	561.5	558	550.5
	0.398	561.5	560	544.5
	0.399	560.5	553	545
	0.4	561	557.5	546.5
	0.401	562.5	554	548.5
	0.402	562.5	558.5	549
	0.403	561	559.5	546.5
	0.404	560.5	557.5	547
	0.405	561	554	544
	0.406	563	559.5	546.5
	0.407	563	558.5	545
	0.408	560.5	557.5	547
	0.409	561.5	558.5	545
	0.41	562	559	547.5
	0.411	560.5	557.5	545.5
	0.412	558.5	558	547
	0.413	560.5	559	546
	0.414	560	561.5	545
	0.415	561	557.5	549
	0.416	559	561.5	544
	0.417	558.5	558	549.5
	0.418	561	558.5	547
	0.419	558	554	547
	0.42	560.5	554	549.5
	0.421	564	560	550.5
	0.422	554	558.5	549
	0.423	558	560.5	550.5
	0.424	557	558.5	550
	0.425	560.5	563.5	547.5
	0.426	556.5	561.5	553.5
	0.427	560.5	559	552
	0.428	554	557	547
	0.429	559	558	547
	0.43	554	557	552
	0.431	554	562	549
	0.432	560	558	551.5
	0.433	554	563	551.5
	0.434	554	559	552.5
	0.435	554	561.5	550
	0.436	558	560.5	551.5
	0.437	554	561	551.5
	0.438	554	554	550.5
	0.439	554	559	554
	0.44	557	558.5	551.5
	0.441	554	558.5	551.5
	0.442	551	561.5	554
	0.443	554	558	552.5
	0.444	551	561	551.5
	0.445	554	560.5	554
	0.446	553.5	563	551.5
	0.447	554	560	551.5
	0.448	553	557	552.5
	0.449	553	561	554
	0.45	551.5	560.5	556.5
	0.451	554	562.5	557.5
	0.452	550.5	563	552.5
	0.453	549	556.5	551.5
	0.454	553	557	556.5
	0.455	547.5	563	558.5
	0.456	550	561	558
	0.457	551	561.5	554
	0.458	551	561	560.5
	0.459	551	561.5	554
	0.46	547	563	554
	0.461	552	560.5	554
	0.462	548.5	556.5	558
	0.463	550	559.5	554
	0.464	546	560.5	557.5
	0.465	549.5	560	556.5
	0.466	547	561.5	558
	0.467	547.5	562	557.5
	0.468	552	560.5	554
	0.469	549.5	564	554
	0.47	547.5	561	557.5
	0.471	548	560.5	557.5
	0.472	548	560.5	559
	0.473	548	557.5	559
	0.474	545.5	560.5	558.5
	0.475	547	561.5	557.5
	0.476	552	560.5	560.5
	0.477	552.5	562.5	554
	0.478	551	561	557
	0.479	547.5	562	554
	0.48	547	560.5	558
	0.481	547	561.5	554
	0.482	546	564	554
	0.483	546.5	558.5	561.5
	0.484	548.5	561.5	560.5
	0.485	551	561.5	559
	0.486	548.5	561	557
	0.487	545	561.5	554
	0.488	552	563	559
	0.489	550	564.5	559
	0.49	549.5	563.5	560
	0.491	550	563.5	556.5
	0.492	549	565.5	557.5
	0.493	552	561	554
	0.494	548.5	560.5	558.5
	0.495	552	562	559
	0.496	550	554	557.5
	0.497	552	560	557.5
	0.498	551	560.5	560
	0.499	553	560.5	560
	0.5	551	558	557.5
	0.501	550	560.5	558.5
	0.502	549.5	561.5	558
	0.503	554	558	561
	0.504	552.5	559	558
	0.505	554	558	554
	0.506	552.5	558.5	554
	0.507	554	554	560
	0.508	554	562	554
	0.509	554	557.5	554
	0.51	554	560.5	554
	0.511	556	558	554
	0.512	552	561	554
	0.513	553.5	554	554
	0.514	553.5	560	554
	0.515	554	560	554
	0.516	554	554	554
	0.517	556.5	557.5	554
	0.518	554	554	554
	0.519	554	554	554
	0.52	557.5	554	554
	0.521	554	554	558
	0.522	554	560.5	554
	0.523	557	554	554
	0.524	557.5	554	552.5
	0.525	554	559	553.5
	0.526	554	554	554
	0.527	554	558	554
	0.528	557	554	554
	0.529	558.5	554	551.5
	0.53	557	554	554
	0.531	554	554	552
	0.532	554	554	552
	0.533	554	554	554
	0.534	553	558	553
	0.535	556.5	554	549.5
	0.536	554	552.5	553
	0.537	554	554	551.5
	0.538	554	551	550.5
	0.539	552	552.5	554
	0.54	554	553	554
	0.541	554	557.5	554
	0.542	554	554	548.5
	0.543	551.5	553.5	554
	0.544	553.5	550.5	553.5
	0.545	553	551.5	552.5
	0.546	552	552.5	554
	0.547	554	552.5	550
	0.548	554	552	550
	0.549	554	553.5	550.5
	0.55	552	554	554
	0.551	553.5	551	552.5
	0.552	552.5	553.5	549
	0.553	549.5	549	554
	0.554	557.5	547.5	554
	0.555	550	553	554
	0.556	549.5	547	552.5
	0.557	554	550.5	552
	0.558	552.5	550	549
	0.559	552	549	552.5
	0.56	554	548	551
	0.561	548.5	548.5	553.5
	0.562	551	548.5	553
	0.563	548	548	553.5
	0.564	550	550	554
	0.565	551	551	553.5
	0.566	550.5	550	551.5
	0.567	548.5	544.5	551.5
	0.568	550.5	548	551.5
	0.569	547.5	549	553
	0.57	552	544	553
	0.571	550.5	548.5	553
	0.572	549.5	552	551.5
	0.573	554	546.5	552
	0.574	552.5	546	549
	0.575	551	545	552
	0.576	549	547.5	554
	0.577	550	548	554
	0.578	550	545	549.5
	0.579	550.5	548	549
	0.58	551	544	550.5
	0.581	549	546.5	548.5
	0.582	549.5	546	553
	0.583	551.5	546	551.5
	0.584	552	546	551.5
	0.585	550	548	553.5
	0.586	551	547	554
	0.587	554	549	547.5
	0.588	552	548	552.5
	0.589	552	548	552.5
	0.59	551	544	554
	0.591	550	543.5	550.5
	0.592	553.5	544.5	551.5
	0.593	554	545.5	551
	0.594	552.5	546	553.5
	0.595	552	543.5	551.5
	0.596	556.5	546	550.5
	0.597	552.5	546.5	552
	0.598	553.5	544.5	551
	0.599	552.5	543	554
	0.6	552.5	545	554
	0.601	554	543	553.5
	0.602	557.5	543	554
	0.603	553.5	543	549.5
	0.604	557	543.5	552.5
	0.605	554	542	554
	0.606	558	543	554
	0.607	556.5	544.5	552.5
	0.608	560	542	554
	0.609	559.5	541.5	554
	0.61	561	542	552.5
	0.611	560	546	554
	0.612	561.5	542	552
	0.613	560	547	551.5
	0.614	561	544.5	554
	0.615	560	543	556
	0.616	560.5	544	556.5
	0.617	562	540	551.5
	0.618	561	544	552.5
	0.619	561.5	543	557.5
	0.62	562	544	554
	0.621	559.5	546	554
	0.622	559	547	554
	0.623	560.5	545.5	551.5
	0.624	562.5	544	553.5
	0.625	561.5	542.5	554
	0.626	562.5	540	553
	0.627	560	540	554
	0.628	559.5	544.5	554
	0.629	561	543	554
	0.63	563	544.5	552.5
	0.631	560.5	546	554
	0.632	560.5	545	553
	0.633	565.5	546	553
	0.634	561	543	550.5
	0.635	565	542.5	554
	0.636	563	546.5	554
	0.637	564.5	542.5	554
	0.638	564	544	551.5
	0.639	563.5	545.5	552
	0.64	561.5	545	552
	0.641	562	546	550
	0.642	563.5	544	549.5
	0.643	563.5	546.5	551.5
	0.644	563.5	545	552.5
	0.645	564	543.5	549
	0.646	561.5	545	552.5
	0.647	559	545.5	551
	0.648	562	543.5	554
	0.649	560.5	547.5	551
	0.65	560	542.5	551.5
	0.651	562	548	553
	0.652	563	545	554
	0.653	559.5	546.5	552.5
	0.654	566.5	547	550
	0.655	561	546.5	553.5
	0.656	564.5	545	550
	0.657	557.5	550	554
	0.658	558.5	547.5	548.5
	0.659	557	542.5	552.5
	0.66	561	545	552
	0.661	562	544.5	553.5
	0.662	559.5	548.5	552.5
	0.663	558.5	544.5	552
	0.664	556.5	544.5	551
	0.665	559	547	549.5
	0.666	560.5	546.5	554
	0.667	557.5	547	554
	0.668	559	546.5	554
	0.669	559	547	552.5
	0.67	559.5	546.5	552.5
	0.671	559	545.5	553
	0.672	559	547	550.5
	0.673	558.5	548.5	553.5
	0.674	554	546.5	554
	0.675	554	544.5	552.5
	0.676	560.5	548.5	560
	0.677	554	548.5	554
	0.678	553.5	547	557
	0.679	551	548.5	554
	0.68	557	549.5	554
	0.681	554	546.5	554
	0.682	554	547.5	559
	0.683	558.5	547.5	554
	0.684	556.5	549	554
	0.685	558	547	558
	0.686	558	545.5	554
	0.687	554	546.5	554
	0.688	554	547.5	560
	0.689	558.5	549.5	554
	0.69	559	550	559.5
	0.691	560.5	550.5	558.5
	0.692	557.5	549	559.5
	0.693	558	549.5	554
	0.694	560	549.5	554
	0.695	554	552	554
	0.696	557	549	560.5
	0.697	558	550	554
	0.698	554	551.5	560.5
	0.699	554	550	559
	0.7	557	549	554
	0.701	560	550.5	557
	0.702	557.5	549	554
	0.703	558	552	558
	0.704	561.5	549.5	554
	0.705	559.5	551	560
	0.706	558.5	554	554
	0.707	561	550	559
	0.708	560	551	557.5
	0.709	559.5	552.5	554
	0.71	560.5	552	561.5
	0.711	558	552.5	554
	0.712	557.5	552.5	557
	0.713	554	550	554
	0.714	560.5	549.5	554
	0.715	561	549	554
	0.716	559	551	554
	0.717	558	550.5	554
	0.718	557.5	552	558
	0.719	554	549.5	559
	0.72	558	550.5	554
	0.721	557.5	548.5	554
	0.722	559	552	554
	0.723	560.5	550.5	551.5
	0.724	561	549	557.5
	0.725	561	551.5	552
	0.726	557.5	552	554
	0.727	560	550	554
	0.728	561	554	554
	0.729	561	554	553
	0.73	557	552	554
	0.731	558	549	554
	0.732	559	550	553
	0.733	558	549.5	550
	0.734	560.5	552.5	554
	0.735	554	549	553.5
	0.736	561.5	554	554
	0.737	559	547	552.5
	0.738	561	547	548.5
	0.739	554	550.5	553
	0.74	560	552.5	554
	0.741	560.5	553	551
	0.742	557	553.5	554
	0.743	559	554	551.5
	0.744	557	554	554
	0.745	558	551	554
	0.746	554	554	554
	0.747	558.5	550.5	551.5
	0.748	558	553.5	553.5
	0.749	558	553.5	550
	0.75	557	551	550
	0.751	554	548	552.5
	0.752	557.5	554	551
	0.753	554	551.5	553
	0.754	554	551.5	550.5
	0.755	554	552	552.5
	0.756	554	554	552
	0.757	554	553.5	553
	0.758	554	554	554
	0.759	551	552	551
	0.76	554	551	551
	0.761	554	557	548.5
	0.762	552.5	551.5	552
	0.763	554	550.5	552.5
	0.764	554	554	554
	0.765	551.5	550	550
	0.766	551	553	552
	0.767	554	551.5	550.5
	0.768	550	554	550.5
	0.769	550.5	553	553.5
	0.77	548.5	554	550.5
	0.771	548.5	554	552.5
	0.772	547	549	553.5
	0.773	549	554	549
	0.774	551	552.5	552.5
	0.775	547	552	550.5
	0.776	548.5	557.5	554
	0.777	554	551.5	551.5
	0.778	553	554	552
	0.779	549.5	553	553.5
	0.78	549.5	554	551.5
	0.781	547	554	552
	0.782	548.5	554	552.5
	0.783	549	554	554
	0.784	548.5	554	552.5
	0.785	551	554	551.5
	0.786	549	554	554
	0.787	549	554	551.5
	0.788	551.5	554	552.5
	0.789	549	554	551
	0.79	552	554	554
	0.791	544	558	547.5
	0.792	547.5	557.5	551.5
	0.793	548.5	554	551.5
	0.794	550	553.5	548
	0.795	547.5	558.5	550
	0.796	548	553.5	554
	0.797	547	556.5	551.5
	0.798	550.5	554	550
	0.799	550.5	554	552.5
	0.8	546.5	557.5	553.5
	0.801	550	554	552.5
	0.802	549.5	558	553
	0.803	551	559	553.5
	0.804	549.5	554	551.5
	0.805	547.5	554	549
	0.806	550.5	554	554
	0.807	547.5	558.5	552
	0.808	551	557.5	550.5
	0.809	551.5	554	554
	0.81	553.5	559	553
	0.811	550	560	553
	0.812	551	559.5	550.5
	0.813	551	557	553
	0.814	550.5	561	554
	0.815	550	562.5	551.5
	0.816	550	559	552.5
	0.817	549	562	553
	0.818	548	556	553.5
	0.819	549	562	552.5
	0.82	549	562.5	554
	0.821	553	561.5	554
	0.822	548.5	559.5	554
	0.823	551.5	563.5	554
	0.824	550.5	562	553
	0.825	548	567.5	553
	0.826	550	561	553.5
	0.827	549.5	567	553
	0.828	546.5	560.5	554
	0.829	551	560.5	551
	0.83	548.5	564	553.5
	0.831	550.5	562.5	552.5
	0.832	551.5	566	553.5
	0.833	549.5	565.5	554
	0.834	549.5	568.5	556
	0.835	551	562.5	553.5
	0.836	550.5	564.5	553.5
	0.837	549	565	551
	0.838	550.5	567.5	550
	0.839	551	568.5	552
	0.84	549	566.5	551.5
	0.841	550.5	570	553.5
	0.842	551.5	565	551.5
	0.843	551	566	550.5
	0.844	550.5	567	553
	0.845	550	563	553
	0.846	550.5	565.5	549
	0.847	551	566.5	549.5
	0.848	552.5	569	549.5
	0.849	549.5	569	553
	0.85	550	567.5	549.5
	0.851	551	565.5	554
	0.852	552.5	567.5	552
	0.853	553	569	553.5
	0.854	554	567.5	551
	0.855	552.5	568	551.5
	0.856	552.5	567	554
	0.857	553.5	565.5	551.5
	0.858	554	567.5	551.5
	0.859	552.5	567.5	548.5
	0.86	557	565.5	548
	0.861	554	564.5	548
	0.862	552.5	570.5	551.5
	0.863	554	570.5	547
	0.864	554	568.5	552.5
	0.865	554	567.5	553
	0.866	557	569	550.5
	0.867	554	569	548.5
	0.868	554	564	549.5
	0.869	552.5	571	547
	0.87	556.5	567.5	546.5
	0.871	554	568	549.5
	0.872	554	565.5	551.5
	0.873	556.5	565	548.5
	0.874	554	568.5	550
	0.875	558	567.5	551.5
	0.876	554	567.5	549.5
	0.877	557.5	566.5	550.5
	0.878	554	566	551
	0.879	559.5	567.5	548
	0.88	556	565.5	550
	0.881	557	566	553.5
	0.882	554	564	552
	0.883	557	565	551.5
	0.884	559.5	564	553
	0.885	558.5	561	548.5
	0.886	559	561	549.5
	0.887	554	562.5	550.5
	0.888	559.5	563.5	550.5
	0.889	560	565.5	548.5
	0.89	559.5	560.5	552
	0.891	554	561	550
	0.892	557.5	560	553.5
	0.893	556	558.5	549
	0.894	557.5	560.5	553.5
	0.895	554	559.5	551
	0.896	554	561.5	549
	0.897	554	558.5	552.5
	0.898	557.5	554	550.5
	0.899	554	559.5	549
	0.9	557	558	549.5
	0.901	554	554	551
	0.902	559	558	553.5
	0.903	554	559	552
	0.904	554	554	553.5
	0.905	554	554	552
	0.906	557	554	552
	0.907	554	556.5	549
	0.908	554	554	547.5
	0.909	553	554	552
	0.91	557.5	551	550.5
	0.911	556.5	554	551
	0.912	556.5	554	551.5
	0.913	557	554	548.5
	0.914	557	556.5	550.5
	0.915	554	551	551.5
	0.916	554	550.5	551
	0.917	553	553	549
	0.918	550.5	552.5	549
	0.919	551	552	552
	0.92	558	554	543
	0.921	551.5	548	547
	0.922	550	549.5	547
	0.923	554	549.5	547
	0.924	551	548.5	549
	0.925	551.5	552.5	547
	0.926	554	547	547
	0.927	553	550	545
	0.928	549.5	550.5	547
	0.929	552	553.5	547
	0.93	554	547.5	545.5
	0.931	554	550.5	547
	0.932	551.5	547.5	546
	0.933	549	549.5	548.5
	0.934	554	546.5	547
	0.935	554	550.5	546.5
	0.936	550.5	548	547
	0.937	549.5	548	547
	0.938	554	545.5	549
	0.939	554	547	545
	0.94	552.5	548.5	543.5
	0.941	551.5	549	546.5
	0.942	548.5	548.5	545.5
	0.943	549.5	546	544.5
	0.944	549	547.5	542
	0.945	552.5	545	545.5
	0.946	551	545.5	545.5
	0.947	552	547	543
	0.948	553	545.5	543
	0.949	554	545	547.5
	0.95	548.5	543	544
	0.951	550.5	547.5	545
	0.952	554	543.5	542.5
	0.953	554	547.5	543
	0.954	549	550	543
	0.955	552	547	545.5
	0.956	553	547	547.5
	0.957	550.5	546	541.5
	0.958	552	547	546.5
	0.959	549	549	546.5
	0.96	553	544.5	543.5
	0.961	551	545.5	547
	0.962	550	546.5	543
	0.963	554	549	547
	0.964	553.5	549.5	541.5
	0.965	553	545.5	541.5
	0.966	552	544	541
	0.967	553	545.5	543
	0.968	554	548	542.5
	0.969	553.5	545.5	544.5
	0.97	553.5	548.5	544
	0.971	552.5	547.5	544.5
	0.972	551	548	546.5
	0.973	553	551.5	542
	0.974	553.5	552	541.5
	0.975	552.5	549.5	546
	0.976	554	549.5	540.5
	0.977	552	549.5	541
	0.978	553	546	543.5
	0.979	550.5	551	545
	0.98	551	547	545
	0.981	554	548.5	546.5
	0.982	554	550	545
	0.983	554	552	542.5
	0.984	549.5	548	542
	0.985	553	552.5	545
	0.986	551	550.5	543
	0.987	549.5	552	543
	0.988	554	550.5	545.5
	0.989	552.5	551.5	541.5
	0.99	554	550	544.5
	0.991	552.5	550.5	541.5
	0.992	552	553.5	545
	0.993	551.5	553	542
	0.994	553	553	540.5
	0.995	549.5	554	544.5
	0.996	550.5	554	544.5
	0.997	552.5	553.5	543.5
	0.998	553.5	552	547.5
	0.999	549.5	554	545
	1	552.5	556.5	545.5
	1.001	549.5	554	541
	1.002	548	553	544.5
	1.003	552.5	552.5	544.5
	1.004	550	554	542
	1.005	547	558.5	548.5
	1.006	547	554	547
	1.007	546.5	552	548
	1.008	547	558.5	544.5
	1.009	545	557	547
	1.01	548	554	548
	1.011	546	552.5	545
	1.012	544	559	547
	1.013	548	554	547.5
	1.014	547	553.5	547.5
	1.015	546	554	549
	1.016	543	554	547
	1.017	543.5	554	548
	1.018	546.5	554	546.5
	1.019	545	556.5	548
	1.02	546	554	548.5
	1.021	547.5	554	550
	1.022	546.5	554	551.5
	1.023	543	557	550.5
	1.024	546	554	550
	1.025	542	554	547.5
	1.026	540	554	549
	1.027	541.5	553	552.5
	1.028	540.5	559.5	554
	1.029	545	557.5	551
	1.03	544.5	558	552.5
	1.031	542	554	553
	1.032	541	554	552
	1.033	542	558.5	554
	1.034	544	558	554
	1.035	540.5	554	554
	1.036	543	558	553.5
	1.037	542.5	557.5	554
	1.038	543	557.5	554
	1.039	542	559	554
	1.04	543	561.5	554
	1.041	547	559	554
	1.042	546	560	554
	1.043	547	554	559
	1.044	548.5	554	554
	1.045	543	557.5	559
	1.046	546	554	557.5
	1.047	549	560.5	554
	1.048	546	559	557
	1.049	543.5	560.5	558
	1.05	547	557	557.5
	1.051	547	559.5	554
	1.052	551	559	557
	1.053	546.5	558.5	557
	1.054	552	560.5	557.5
	1.055	549.5	556	557
	1.056	550.5	560	557
	1.057	549	561	557.5
	1.058	550.5	558.5	556.5
	1.059	551.5	554	560
	1.06	552.5	561	557
	1.061	554	554	563.5
	1.062	552.5	560.5	558.5
	1.063	550	560	560.5
	1.064	553	559	560.5
	1.065	553.5	557.5	559
	1.066	553	557.5	563.5
	1.067	557	558	562
	1.068	557.5	554	561
	1.069	554	558.5	563
	1.07	554	561.5	561.5
	1.071	554	560	562
	1.072	554	559.5	567.5
	1.073	556.5	558	565
	1.074	560	557.5	565.5
	1.075	554	558.5	561.5
	1.076	553.5	554	565.5
	1.077	554	557	569
	1.078	560.5	554	565
	1.079	556	558	567.5
	1.08	554	558.5	566.5
	1.081	559.5	554	563
	1.082	560	559.5	564
	1.083	554	554	567
	1.084	556	554	561.5
	1.085	558.5	559	568.5
	1.086	559.5	558	571
	1.087	560.5	554	568
	1.088	557.5	560	566.5
	1.089	560	554	571.5
	1.09	560.5	557	568
	1.091	560	557.5	570
	1.092	561	557	569
	1.093	560.5	554	566
	1.094	561	557.5	569
	1.095	559.5	554	570
	1.096	563.5	554	571
	1.097	562	554	573
	1.098	565.5	554	573
	1.099	561.5	554	572
	1.1	565	556.5	569
	1.101	560.5	557	568.5
	1.102	563.5	553.5	572
	1.103	564	554	573.5
	1.104	565.5	556	570
	1.105	562.5	553.5	572.5
	1.106	563.5	554	569
	1.107	564.5	554	568.5
	1.108	563.5	553	572
	1.109	567	553.5	574
	1.11	564	556.5	569
	1.111	566	553.5	572.5
	1.112	566.5	558	570.5
	1.113	560	557.5	570
	1.114	561.5	554	570.5
	1.115	564.5	553.5	568
	1.116	561.5	553.5	569
	1.117	561.5	553	569
	1.118	561.5	553.5	568
	1.119	560.5	554	570
	1.12	561	554	570.5
	1.121	560.5	554	567.5
	1.122	561	558	572.5
	1.123	561.5	554	567
	1.124	560	558	567.5
	1.125	561	558	566.5
	1.126	561.5	558	566.5
	1.127	561.5	552.5	566.5
	1.128	561	554	567.5
	1.129	560.5	554	567
	1.13	560.5	551.5	570
	1.131	560.5	551	568
	1.132	562.5	552.5	571
	1.133	559.5	557	567.5
	1.134	560.5	554	567
	1.135	558.5	551.5	567
	1.136	562.5	554	564
	1.137	561	553.5	568.5
	1.138	556	554	566
	1.139	559	553.5	566
	1.14	562	552.5	564.5
	1.141	560	554	563.5
	1.142	560.5	554	561.5
	1.143	560	554	563
	1.144	558	554	562
	1.145	558.5	554	565
	1.146	554	552	565.5
	1.147	558.5	551	565.5
	1.148	562	554	562.5
	1.149	558	552.5	564.5
	1.15	557.5	554	565
	1.151	559.5	553.5	567.5
	1.152	558	549	564.5
	1.153	558.5	549.5	561.5
	1.154	559.5	554	564
	1.155	557.5	553.5	562
	1.156	560.5	553.5	562.5
	1.157	560	554	559
	1.158	567	558	561.5
	1.159	559	554	565
	1.16	560	554	563.5
	1.161	556.5	554	561
	1.162	556.5	554	556.5
	1.163	554	554	557.5
	1.164	557.5	554	560.5
	1.165	558	553.5	559
	1.166	558.5	554	557
	1.167	559	554	562
	1.168	554	558	559.5
	1.169	559.5	554	559.5
	1.17	557.5	554	554
	1.171	554	554	556.5
	1.172	554	554	561.5
	1.173	557.5	557.5	557
	1.174	559	554	561
	1.175	558.5	552.5	560.5
	1.176	557	554	557
	1.177	554	554	554
	1.178	554	554	559.5
	1.179	557.5	554	554
	1.18	554	554	554
	1.181	557.5	558	554
	1.182	557.5	554	558.5
	1.183	554	558.5	558
	1.184	554	552.5	560.5
	1.185	553	557	554
	1.186	554	554	554
	1.187	559.5	554	552.5
	1.188	554	554	554
	1.189	554	554	552.5
	1.19	554	554	554
	1.191	554	558	554
	1.192	554	554	554
	1.193	552.5	554	554
	1.194	554	559	551
	1.195	554	557.5	553
	1.196	554	553	550.5
	1.197	554	558	550.5
	1.198	551.5	554	551.5
	1.199	554	554	551.5
	1.2	553.5	554	554
	1.201	552.5	554	551.5
	1.202	554	557.5	549
	1.203	553	554	549.5
	1.204	554	553.5	554
	1.205	548	554	554
	1.206	551.5	554	551
	1.207	550	552	550
	1.208	553.5	554	547.5
	1.209	551.5	554	551.5
	1.21	551.5	557	548
	1.211	549	551	546.5
	1.212	551.5	553	549
	1.213	553.5	554	550.5
	1.214	552	554	549
	1.215	550.5	553.5	550
	1.216	552.5	553	547.5
	1.217	548	553	547
	1.218	554	552	547
	1.219	549	554	548
	1.22	549	554	548.5
	1.221	550.5	554	550
	1.222	550.5	552.5	547
	1.223	550.5	554	547
	1.224	549.5	554	549.5
	1.225	548.5	554	547
	1.226	547	552	549
	1.227	550	553.5	549.5
	1.228	549.5	552	552.5
	1.229	549	553	547.5
	1.23	549.5	553.5	550.5
	1.231	548	552.5	549
	1.232	550.5	553.5	548.5
	1.233	548.5	554	541
	1.234	549	551.5	548.5
	1.235	552	554	547.5
	1.236	550	554	545
	1.237	551	552	549.5
	1.238	554	551	551
	1.239	550.5	549	548
	1.24	548	552	553
	1.241	552	553	544.5
	1.242	551	551	547.5
	1.243	550	553.5	547
	1.244	553.5	554	547
	1.245	552.5	554	547
	1.246	553	554	548
	1.247	554	554	545.5
	1.248	552	554	550.5
	1.249	552	554	548.5
	1.25	547.5	550	546.5
	1.251	551.5	556	544.5
	1.252	554	554	549
	1.253	549	554	544.5
	1.254	548.5	554	546.5
	1.255	551	554	545.5
	1.256	553	553	546.5
	1.257	554	554	546.5
	1.258	552	554	547
	1.259	553.5	556	546.5
	1.26	553.5	554	547
	1.261	553	553	548.5
	1.262	554	552	549.5
	1.263	554	554	544
	1.264	553.5	554	547
	1.265	558	554	547
	1.266	552	553.5	547
	1.267	554	554	548.5
	1.268	554	554	547
	1.269	554	554	543
	1.27	559	554	544
	1.271	556.5	551.5	545.5
	1.272	554	557	549
	1.273	554	554	548
	1.274	554	553	545.5
	1.275	558	554	544
	1.276	557	554	545.5
	1.277	554	553.5	540.5
	1.278	554	554	544.5
	1.279	554	554	543.5
	1.28	554	556.5	544
	1.281	553	554	546.5
	1.282	557.5	554	542
	1.283	556.5	554	543.5
	1.284	554	554	546
	1.285	557	557.5	546.5
	1.286	558	557.5	547
	1.287	559.5	558	545.5
	1.288	554	554	544.5
	1.289	554	554	543
	1.29	554	554	541.5
	1.291	560	559.5	541.5
	1.292	554	554	540
	1.293	560	558	544
	1.294	554	557	545.5
	1.295	557	554	543
	1.296	554	554	540
	1.297	554	554	541.5
	1.298	558	553	541.5
	1.299	554	554	544
	1.3	557.5	554	544.5
	1.301	554	559	544.5
	1.302	557	559.5	542.5
	1.303	554	554	541
	1.304	554	554	544
	1.305	554	557.5	545.5
	1.306	554	554	545
	1.307	554	560.5	545.5
	1.308	554	554	544
	1.309	559	558	546.5
	1.31	554	554	544
	1.311	554	559.5	545
	1.312	554	558	544.5
	1.313	561	559	546.5
	1.314	554	559	545
	1.315	554	559.5	544
	1.316	557.5	557	544
	1.317	557.5	554	546.5
	1.318	554	558.5	547
	1.319	554	562	546
	1.32	554	557.5	545.5
	1.321	554	554	549.5
	1.322	554	554	545
	1.323	554	557	551
	1.324	554	558	546.5
	1.325	554	560	550.5
	1.326	558.5	558	547
	1.327	553.5	558	547
	1.328	557.5	554	547
	1.329	558.5	559	549
	1.33	554	559	546.5
	1.331	559.5	554	547
	1.332	558.5	558	551
	1.333	554	558	550
	1.334	559.5	559	545
	1.335	556.5	558	548.5
	1.336	557.5	560.5	546.5
	1.337	557.5	559	547.5
	1.338	557.5	556.5	549
	1.339	554	557	548.5
	1.34	554	557.5	547.5
	1.341	554	558	547
	1.342	554	559	548.5
	1.343	554	559	551
	1.344	554	554	548.5
	1.345	554	554	550.5
	1.346	561	558.5	552
	1.347	554	558.5	554
	1.348	557	559.5	551.5
	1.349	557	559.5	544
	1.35	558	557.5	547
	1.351	560.5	554	547
	1.352	559.5	560	546.5
	1.353	558.5	560	549
	1.354	558	554	547
	1.355	558	554	549
	1.356	559	556.5	547
	1.357	559	558.5	548
	1.358	558	553.5	547.5
	1.359	557.5	559	546.5
	1.36	554	562	546
	1.361	554	554	550.5
	1.362	557	557.5	546
	1.363	561.5	558	547.5
	1.364	554	556.5	547
	1.365	554	558	548.5
	1.366	557	560	546
	1.367	558	557.5	550.5
	1.368	554	558.5	547
	1.369	558	557.5	548
	1.37	558	554	546.5
	1.371	560.5	558	547.5
	1.372	557.5	552.5	545
	1.373	556	554	546
	1.374	558.5	560.5	545
	1.375	553.5	554	547
	1.376	554	554	552
	1.377	554	554	547
	1.378	554	554	546
	1.379	559	554	552.5
	1.38	557	554	545.5
	1.381	554	557	548
	1.382	554	553	550
	1.383	554	554	549
	1.384	554	554	553.5
	1.385	554	553	553.5
	1.386	557.5	554	551
	1.387	559.5	554	551
	1.388	558	552	550.5
	1.389	557	554	551
	1.39	554	554	548.5
	1.391	554	552	551
	1.392	557	554	551
	1.393	558.5	551	554
	1.394	554	554	549.5
	1.395	554	554	549.5
	1.396	554	553	549
	1.397	554	553.5	548.5
	1.398	554	548.5	549
	1.399	554	553	554
	1.4	554	551	551.5
	1.401	552	554	552.5
	1.402	554	552.5	552.5
	1.403	552.5	554	554
	1.404	554	554	553
	1.405	554	548	554
	1.406	549	551	552
	1.407	554	553	551.5
	1.408	554	551.5	554
	1.409	554	550.5	554
	1.41	554	553.5	551.5
	1.411	551.5	554	549
	1.412	554	552.5	549
	1.413	551.5	552.5	554
	1.414	554	551.5	552
	1.415	552.5	550.5	553.5
	1.416	552.5	553	550
	1.417	552.5	554	554
	1.418	553	548	552.5
	1.419	554	552.5	547.5
	1.42	554	549	554
	1.421	553.5	554	554
	1.422	553	552.5	553.5
	1.423	551.5	551.5	554
	1.424	553	552.5	553.5
	1.425	551	551.5	554
	1.426	552.5	552	552.5
	1.427	557	552.5	552
	1.428	552.5	552	552
	1.429	554	554	553.5
	1.43	554	551	549
	1.431	550	552	553
	1.432	551.5	552	551.5
	1.433	553.5	554	548
	1.434	554	552.5	554
	1.435	556.5	551.5	548.5
	1.436	552.5	553	549.5
	1.437	554	550	550
	1.438	554	552.5	547
	1.439	554	554	550.5
	1.44	554	551	551.5
	1.441	558.5	554	551.5
	1.442	554	554	550.5
	1.443	553.5	554	548
	1.444	554	553	550.5
	1.445	554	551.5	545.5
	1.446	553.5	550.5	548
	1.447	553	554	547
	1.448	553.5	551.5	551
	1.449	553.5	549.5	549
	1.45	554	551.5	547.5
	1.451	554	553	546
	1.452	554	553.5	544
	1.453	553.5	554	547
	1.454	554	554	550.5
	1.455	554	552.5	547
	1.456	554	552	549
	1.457	554	549	550.5
	1.458	557.5	549	548.5
	1.459	547.5	551.5	552.5
	1.46	553.5	550.5	549.5
	1.461	552.5	548.5	546.5
	1.462	552.5	554	551.5
	1.463	551.5	554	547.5
	1.464	551	552.5	546.5
	1.465	554	548.5	548.5
	1.466	550	548.5	548.5
	1.467	550.5	550	543.5
	1.468	551.5	549	549.5
	1.469	550	551.5	552
	1.47	552.5	549	550.5
	1.471	554	553.5	550
	1.472	554	546.5	548.5
	1.473	554	549.5	554
	1.474	547	548.5	553
	1.475	552	549.5	547.5
	1.476	549.5	546.5	548
	1.477	551.5	550.5	551.5
	1.478	548	546	550
	1.479	552.5	550.5	547
	1.48	547	550.5	548
	1.481	548	546.5	548
	1.482	549.5	549	552
	1.483	549.5	547	547
	1.484	551	547	554
	1.485	548.5	546.5	549.5
	1.486	547	549.5	547
	1.487	549.5	548	551.5
	1.488	549	546.5	551
	1.489	546	542	553
	1.49	546	544.5	553
	1.491	548	545	549
	1.492	549.5	541	551
	1.493	547	545	548
	1.494	549	546	551.5
	1.495	547	544	553
	1.496	550	548.5	554
	1.497	545.5	545	552.5
	1.498	544.5	548.5	549
	1.499	549	546.5	551.5
	1.5	550	546	552
	1.501	547	545	552.5
	1.502	549	546	550
	1.503	548.5	543	550.5
	1.504	548	543	552
	1.505	546.5	542.5	547
	1.506	549	544	551
	1.507	548	546	547.5
	1.508	549.5	544	549
	1.509	548	546	547.5
	1.51	546	544.5	549
	1.511	551.5	548.5	548
	1.512	551.5	547.5	547
	1.513	554	545.5	550
	1.514	549	549	550
	1.515	550.5	548.5	547
	1.516	552.5	547	549
	1.517	551.5	546	549.5
	1.518	551	546.5	547.5
	1.519	551	544.5	549
	1.52	552.5	544	546
	1.521	553	547.5	549.5
	1.522	554	544.5	546.5
	1.523	556.5	547	544.5
	1.524	553	546.5	544.5
	1.525	554	547.5	547
	1.526	551.5	548	547
	1.527	554	547.5	544
	1.528	554	546.5	547
	1.529	553.5	547.5	546
	1.53	557	546	545
	1.531	558	547.5	542.5
	1.532	554	546	544.5
	1.533	559.5	547.5	545
	1.534	559.5	549	542
	1.535	560	549	545.5
	1.536	560.5	545.5	541
	1.537	558.5	547	541.5
	1.538	559.5	546	541
	1.539	559	544.5	535.5
	1.54	560	546.5	538.5
	1.541	563	546.5	537.5
	1.542	560.5	540.5	536.5
	1.543	562.5	546.5	542
	1.544	561	545.5	538.5
	1.545	562	545.5	534
	1.546	561	546	532
	1.547	561	546.5	536
	1.548	562	546.5	539
	1.549	560	544	535.5
	1.55	566.5	543	536.5
	1.551	566	547.5	538.5
	1.552	563	543.5	539
	1.553	558	545.5	539.5
	1.554	567.5	543	535.5
	1.555	562.5	546	538
	1.556	562.5	548.5	537
	1.557	560	544.5	538.5
	1.558	564	545.5	539
	1.559	565	546	539.5
	1.56	563	545	541
	1.561	564	544	541
	1.562	563.5	545.5	542.5
	1.563	565	545.5	545.5
	1.564	565	542.5	547.5
	1.565	568	545.5	548
	1.566	567	548	543.5
	1.567	563.5	545.5	548
	1.568	562.5	546	552.5
	1.569	564	544.5	548.5
	1.57	562.5	549	551.5
	1.571	565.5	544.5	553
	1.572	563.5	547.5	552.5
	1.573	561	547	554
	1.574	561.5	542.5	554
	1.575	564.5	545.5	554
	1.576	564.5	547	554
	1.577	564	547	560
	1.578	561.5	546.5	562
	1.579	562	548.5	560
	1.58	560.5	547	562
	1.581	563.5	550	565
	1.582	563.5	549	564.5
	1.583	561	547.5	567.5
	1.584	565.5	553	565
	1.585	561	547	568
	1.586	560	552.5	569
	1.587	563.5	552.5	569
	1.588	559	549.5	565
	1.589	564	553.5	565
	1.59	561.5	552	569
	1.591	560.5	554	569
	1.592	560	554	571.5
	1.593	559.5	554	573
	1.594	559.5	554	570
	1.595	559.5	554	572.5
	1.596	561.5	552.5	569.5
	1.597	560	554	571
	1.598	562	554	572.5
	1.599	562	559	576
	1.6	561	554	574.5
	1.601	561	558.5	577.5
	1.602	559	560.5	578
	1.603	561	559	574.5
	1.604	561.5	560.5	580
	1.605	559.5	562.5	574.5
	1.606	558	562	578
	1.607	560	560.5	579.5
	1.608	560	560	576.5
	1.609	560	561	580.5
	1.61	558	565	579.5
	1.611	561.5	563.5	575
	1.612	563.5	564.5	581
	1.613	560	565.5	578
	1.614	558.5	567.5	577.5
	1.615	559	567.5	579.5
	1.616	559.5	567.5	579
	1.617	558	565	578
	1.618	561	568	579
	1.619	561	564.5	578.5
	1.62	557	568	580
	1.621	560.5	568.5	581
	1.622	554	565.5	577
	1.623	559	568	581
	1.624	558.5	571	575
	1.625	558.5	570	578
	1.626	559	572	576
	1.627	556	570	576
	1.628	559.5	571	576.5
	1.629	554	569	572.5
	1.63	559	572.5	577
	1.631	560	570	574.5
	1.632	558.5	573	571.5
	1.633	557.5	574.5	576
	1.634	559.5	576	573
	1.635	558	571	577
	1.636	559	574	574
	1.637	558	570	573.5
	1.638	554	574	574
	1.639	557.5	574	572
	1.64	558	573.5	575
	1.641	557	574.5	573.5
	1.642	560.5	572.5	572.5
	1.643	557.5	572.5	572
	1.644	559	573	574.5
	1.645	560.5	571	568.5
	1.646	554	571	568.5
	1.647	557	574	576
	1.648	558.5	572.5	568
	1.649	559	571	568
	1.65	554	574	574.5
	1.651	554	574.5	569.5
	1.652	559.5	571.5	568
	1.653	557.5	573.5	567.5
	1.654	554	570	569
	1.655	560	570.5	568
	1.656	557.5	574	569.5
	1.657	558.5	572.5	570.5
	1.658	554	571.5	567
	1.659	558.5	571.5	565.5
	1.66	557.5	572	566.5
	1.661	558.5	568	568.5
	1.662	560	565.5	567.5
	1.663	558	567	569.5
	1.664	557.5	568	569
	1.665	559.5	567.5	565
	1.666	558.5	568	565
	1.667	554	569.5	566
	1.668	557	572	567
	1.669	560	568	565.5
	1.67	554	570.5	569
	1.671	554	565.5	567.5
	1.672	554	568	567.5
	1.673	554	565	567.5
	1.674	556.5	567	567
	1.675	556.5	560.5	563
	1.676	554	566.5	563.5
	1.677	557.5	561	567.5
	1.678	557	563	563
	1.679	553	560	563
	1.68	554	563.5	565.5
	1.681	553	565.5	565
	1.682	553	562.5	563.5
	1.683	554	562	565.5
	1.684	554	560.5	567
	1.685	554	560.5	564
	1.686	552.5	560.5	564
	1.687	554	556.5	561.5
	1.688	554	559	559.5
	1.689	554	558.5	560
	1.69	558.5	558	562
	1.691	554	560.5	566
	1.692	553	556.5	564
	1.693	554	559.5	563.5
	1.694	552.5	554	560
	1.695	554	554	563.5
	1.696	558	554	561
	1.697	552.5	557.5	564
	1.698	552.5	557	564
	1.699	552	557	562
	1.7	559	554	554
	1.701	554	554	560.5
	1.702	553.5	553	560.5
	1.703	552.5	552	559.5
	1.704	554	550.5	554
	1.705	554	554	554
	1.706	553.5	554	554
	1.707	552.5	553	554
	1.708	553.5	550	556.5
	1.709	554	551.5	554
	1.71	559	554	552
	1.711	554	549.5	550.5
	1.712	554	552.5	549.5
	1.713	557.5	553	550
	1.714	553.5	549.5	550.5
	1.715	553.5	549.5	553.5
	1.716	553.5	551	552.5
	1.717	554	549.5	547.5
	1.718	557	548	552
	1.719	553	548.5	550.5
	1.72	553.5	551	547
	1.721	553.5	549	546
	1.722	554	547.5	551
	1.723	552.5	549	548
	1.724	554	549	546
	1.725	554	547	546
	1.726	554	548.5	547
	1.727	554	551	545
	1.728	554	546	545
	1.729	554	552.5	545.5
	1.73	553.5	547.5	542.5
	1.731	554	547	542
	1.732	552.5	549.5	546
	1.733	551.5	549.5	543.5
	1.734	557	549.5	544
	1.735	554	551	543
	1.736	552.5	549.5	545
	1.737	554	550.5	543
	1.738	554	547	539.5
	1.739	556.5	546	541
	1.74	553	547	541
	1.741	554	546	543.5
	1.742	554	547.5	542.5
	1.743	554	547.5	542
	1.744	554	545.5	541.5
	1.745	558	551	539.5
	1.746	552.5	548.5	541
	1.747	556.5	550.5	541
	1.748	554	547.5	539.5
	1.749	554	546.5	536
	1.75	557.5	551.5	539
	1.751	554	548	539.5
	1.752	554	547	538
	1.753	554	547	536.5
	1.754	552.5	546	538.5
	1.755	554	547.5	539
	1.756	550.5	548	540.5
	1.757	554	549	534.5
	1.758	552.5	547	538
	1.759	554	547	540
	1.76	552.5	547	537.5
	1.761	556.5	549	536
	1.762	557	552	539
	1.763	550.5	548	537
	1.764	551.5	547	536
	1.765	553.5	548.5	537.5
	1.766	552.5	548	537.5
	1.767	552	550	541
	1.768	553	554	537
	1.769	554	550	536
	1.77	554	551.5	533.5
	1.771	551.5	548.5	539.5
	1.772	554	547	535
	1.773	552	551	538
	1.774	552	550.5	537.5
	1.775	553.5	547.5	536.5
	1.776	547	547.5	536.5
	1.777	550.5	547.5	537
	1.778	550	552	538
	1.779	551	550.5	537
	1.78	550	553.5	536
	1.781	548	548.5	536.5
	1.782	551	552.5	534
	1.783	550	553	535.5
	1.784	547	551	538
	1.785	548.5	553.5	533
	1.786	548.5	551	539
	1.787	546	552	534
	1.788	552	551.5	539
	1.789	547.5	554	534
	1.79	549.5	551	537
	1.791	551.5	552.5	535.5
	1.792	547.5	551.5	532
	1.793	548.5	550.5	534.5
	1.794	548.5	551	535.5
	1.795	548.5	554	532.5
	1.796	551	553.5	536
	1.797	552	549	530.5
	1.798	551	558.5	534
	1.799	547	554	531.5
	1.8	546.5	554	529.5
	1.801	549	557.5	530
	1.802	548.5	554	531.5
	1.803	548.5	553.5	531.5
	1.804	547	554	529
	1.805	549	553	529.5
	1.806	550.5	557.5	530
	1.807	547.5	554	529.5
	1.808	550	554	530
	1.809	550	556.5	530.5
	1.81	548.5	559	526
	1.811	549	558.5	527
	1.812	549	554	525
	1.813	549	558.5	528
	1.814	550	554	527
	1.815	548.5	558.5	526
	1.816	550.5	557.5	524.5
	1.817	548.5	553.5	524.5
	1.818	549.5	554	527
	1.819	549.5	557.5	525
	1.82	554	554	523.5
	1.821	548	557	524.5
	1.822	551.5	557.5	522
	1.823	548.5	558	524.5
	1.824	551.5	561	518
	1.825	550.5	559.5	521
	1.826	547.5	554	522.5
	1.827	551	561	519.5
	1.828	550.5	560.5	521
	1.829	546	560	520
	1.83	549.5	560	519
	1.831	547	558	519
	1.832	549	557.5	519.5
	1.833	552	559.5	522.5
	1.834	551.5	559.5	521.5
	1.835	551	556.5	519.5
	1.836	547	554	517
	1.837	547.5	559	520
	1.838	547	560	520.5
	1.839	545	558.5	523.5
	1.84	547.5	560.5	518.5
	1.841	551.5	558.5	520.5
	1.842	549.5	559	521
	1.843	546	560	520.5
	1.844	546.5	560.5	520
	1.845	547.5	560.5	520
	1.846	546	554	521
	1.847	550.5	559.5	519.5
	1.848	547	560.5	520.5
	1.849	546.5	560.5	520
	1.85	546.5	561	523.5
	1.851	546.5	560.5	523
	1.852	547	557.5	519
	1.853	544	559	522.5
	1.854	546.5	562	524.5
	1.855	546	560	522.5
	1.856	543.5	560.5	522.5
	1.857	547	560	521.5
	1.858	546.5	562	523
	1.859	548	560.5	524
	1.86	544	560	522.5
	1.861	544	563	522
	1.862	546	560.5	521.5
	1.863	543	566.5	522.5
	1.864	544	564	524.5
	1.865	547	560.5	524.5
	1.866	539.5	562.5	526.5
	1.867	545.5	562.5	527.5
	1.868	542.5	563.5	524
	1.869	543	566	526.5
	1.87	543	565	529
	1.871	544	565	526
	1.872	544	564	525.5
	1.873	543.5	563	527
	1.874	539.5	564	525.5
	1.875	540.5	564.5	527.5
	1.876	539.5	559.5	528
	1.877	537	563	528
	1.878	535.5	561	524.5
	1.879	539.5	561.5	524.5
	1.88	540	560.5	528
	1.881	540.5	564.5	527.5
	1.882	537.5	563	526.5
	1.883	536.5	557.5	525
	1.884	537.5	559.5	525
	1.885	542.5	561.5	524
	1.886	538	558	524
	1.887	533.5	559.5	523.5
	1.888	537	560.5	525.5
	1.889	533	561	521
	1.89	536	560	526.5
	1.891	537	564	522.5
	1.892	531	560	526
	1.893	535	560	523.5
	1.894	533.5	558.5	522
	1.895	529.5	560	523
	1.896	530	560	523
	1.897	533.5	559.5	523.5
	1.898	531.5	561	520
	1.899	530.5	560.5	520.5
	1.9	533	558	518
	1.901	528	554	519.5
	1.902	532	558.5	523.5
	1.903	533.5	558	517
	1.904	533.5	558	519
	1.905	532	559.5	518
	1.906	532.5	557.5	518
	1.907	530	554	513
	1.908	528.5	554	515
	1.909	532.5	559	513
	1.91	532.5	554	513
	1.911	532	556.5	513
	1.912	528	553	514.5
	1.913	533	553.5	510
	1.914	530.5	553	513.5
	1.915	529	554	506
	1.916	531.5	551.5	507.5
	1.917	530	552.5	505.5
	1.918	528.5	551.5	507.5
	1.919	533.5	549	504
	1.92	533	549	506
	1.921	532	549.5	503
	1.922	533.5	550.5	502
	1.923	531	550.5	497.5
	1.924	531.5	547	494.5
	1.925	531.5	545.5	498
	1.926	533.5	545	494.5
	1.927	535	545.5	494.5
	1.928	533.5	547	494.5
	1.929	529	546.5	485.5
	1.93	530.5	543	487.5
	1.931	533.5	542.5	487.5
	1.932	531	542	484.5
	1.933	535.5	542.5	480.5
	1.934	534	541	478.5
	1.935	529	543.5	479.5
	1.936	532.5	541.5	478
	1.937	533.5	543	476
	1.938	536.5	542.5	475
	1.939	535	539.5	473
	1.94	534.5	545	471.5
	1.941	536	539	464.5
	1.942	530	541.5	465
	1.943	530.5	540	465
	1.944	528	540.5	463.5
	1.945	533.5	537	460.5
	1.946	533	539	458
	1.947	533	536.5	457.5
	1.948	532.5	542	455
	1.949	535.5	540	454.5
	1.95	534	539.5	453
	1.951	536.5	536.5	457
	1.952	533	536.5	449
	1.953	533.5	535	450
	1.954	535	539	451
	1.955	533	536.5	445.5
	1.956	529	537	446
	1.957	532	537	449.5
	1.958	534.5	535.5	445
	1.959	528.5	539	442.5
	1.96	529.5	533	444
	1.961	528	534.5	442.5
	1.962	532.5	536.5	440
	1.963	530	540	441.5
	1.964	528.5	535.5	439.5
	1.965	530	541	440.5
	1.966	530.5	535	434
	1.967	530.5	537	439.5
	1.968	530	539.5	435
	1.969	528	533.5	437.5
	1.97	526.5	536.5	440
	1.971	528	536	439
	1.972	526	535.5	441.5
	1.973	523.5	536.5	437.5
	1.974	526.5	535.5	439.5
	1.975	525	536	437
	1.976	526.5	538.5	437
	1.977	526	541.5	435
	1.978	522	534	437.5
	1.979	520	537.5	435
	1.98	522	539.5	435
	1.981	517	536.5	435
	1.982	521.5	535.5	430.5
	1.983	516.5	535.5	432.5
	1.984	516	536	433.5
	1.985	518	539	434.5
	1.986	518	536.5	433.5
	1.987	517.5	539.5	434.5
	1.988	513.5	539.5	432.5
	1.989	511	538.5	430.5
	1.99	514	539.5	433
	1.991	513	536	431
	1.992	510.5	535	430.5
	1.993	509	535	430.5
[truncated: 6,006 more rows]

## Sheet: B
DataTypeVer2.0	Time	Fz	Fz	Fz
NumberOfData		8000	8000	8000
PreTriggerData		0	0	0
SamplingTime[ms]		1	1	1
DataLabel		Q1:CMJ	Q2:CMJ	Q3:CMJ
DataUnit	sec	N	N	N
	0	733.5	745.5	782.5
	0.001	737	745.5	778.5
	0.002	738	743	778
	0.003	733	744	775
	0.004	736	743	775.5
	0.005	737	745.5	776.5
	0.006	733.5	745.5	776
	0.007	732.5	745	773.5
	0.008	733.5	744	774.5
	0.009	733.5	745.5	774
	0.01	736	741	772.5
	0.011	736.5	748.5	771.5
	0.012	731.5	747.5	772.5
	0.013	737	744	766
	0.014	733.5	744.5	766.5
	0.015	735	745	762.5
	0.016	733	746.5	765.5
	0.017	738.5	746	763.5
	0.018	731.5	743.5	763.5
	0.019	732.5	744	765.5
	0.02	733	745.5	759.5
	0.021	731.5	745.5	762
	0.022	732.5	745.5	763.5
	0.023	729.5	748	761.5
	0.024	730	747	760.5
	0.025	731.5	745.5	752.5
	0.026	733.5	743.5	754.5
	0.027	727.5	744.5	753.5
	0.028	729.5	745	754.5
	0.029	725.5	746	750
	0.03	726	746	749.5
	0.031	731	746.5	747
	0.032	727	745.5	750
	0.033	724.5	748	749.5
	0.034	722.5	744	748.5
	0.035	723	745.5	746
	0.036	725.5	745	745
	0.037	722.5	745	745.5
	0.038	727.5	745	747
	0.039	722	742.5	745
	0.04	724.5	741	740
	0.041	718.5	742.5	743
	0.042	718	743	740
	0.043	718.5	741.5	741
	0.044	716.5	745.5	738.5
	0.045	718.5	743.5	739
	0.046	717	740.5	738.5
	0.047	716.5	741.5	733.5
	0.048	717.5	744	731
	0.049	718.5	742.5	736.5
	0.05	713	748.5	733
	0.051	713.5	743.5	731.5
	0.052	715	743	732.5
	0.053	715	742.5	731.5
	0.054	711	741	731.5
	0.055	712	741.5	731.5
	0.056	712	739	728.5
	0.057	712	742	729.5
	0.058	714	741	731.5
	0.059	711	740	725.5
	0.06	710.5	738.5	727.5
	0.061	711.5	741	729
	0.062	711	740	726
	0.063	710	738.5	728
	0.064	713	738.5	727
	0.065	710	738.5	726
	0.066	711	742.5	726
	0.067	710	740.5	727
	0.068	711	742	726
	0.069	712	738	725
	0.07	711	738	724
	0.071	716.5	738.5	722.5
	0.072	714	733.5	722.5
	0.073	713	740.5	726
	0.074	715	737.5	725
	0.075	714	737	726
	0.076	714	736	725
	0.077	713	735.5	725
	0.078	715.5	737	726
	0.079	717	738	721.5
	0.08	712.5	737	722
	0.081	717.5	737.5	724.5
	0.082	718.5	733.5	723.5
	0.083	716	737.5	723
	0.084	718	739.5	724.5
	0.085	720.5	733.5	723
	0.086	718.5	733	722.5
	0.087	717	736	724.5
	0.088	717	732.5	718.5
	0.089	721.5	733.5	725.5
	0.09	721	733	723.5
	0.091	718.5	733.5	723.5
	0.092	722.5	730.5	722
	0.093	724	732.5	722.5
	0.094	723	732.5	722
	0.095	718.5	731.5	718.5
	0.096	725	731.5	722.5
	0.097	724	731.5	726
	0.098	718.5	731	722
	0.099	727	730	725
	0.1	725	728	725
	0.101	728	729.5	725
	0.102	726.5	733	723
	0.103	729	731.5	721.5
	0.104	729.5	732.5	725
	0.105	731.5	731	724.5
	0.106	727.5	729	722.5
	0.107	724	733	725
	0.108	729.5	732	727.5
	0.109	731	733	725
	0.11	731.5	732	726
	0.111	730	732.5	722.5
	0.112	732	733.5	725.5
	0.113	729	731.5	725
	0.114	731	731.5	727
	0.115	733.5	731.5	726
	0.116	733.5	732.5	727
	0.117	733	737	727.5
	0.118	732.5	735.5	725
	0.119	732.5	736.5	727.5
	0.12	731.5	739	727
	0.121	733.5	733.5	725
	0.122	736	733.5	726
	0.123	733.5	738	727
	0.124	733.5	733.5	729.5
	0.125	735	737.5	728.5
	0.126	733.5	739.5	728.5
	0.127	733.5	740.5	730
	0.128	733.5	740.5	730
	0.129	735	740	730.5
	0.13	738	740	731
	0.131	733.5	741.5	730.5
	0.132	739	742	731
	0.133	737.5	742.5	729
	0.134	736	743.5	733.5
	0.135	735.5	741.5	733
	0.136	733.5	741	728.5
	0.137	737.5	745.5	730
	0.138	737.5	742	731.5
	0.139	737	746	731.5
	0.14	738.5	744.5	732.5
	0.141	739.5	744.5	731
	0.142	738.5	744	732.5
	0.143	742.5	747	733.5
	0.144	738.5	746	731.5
	0.145	740	746	731
	0.146	740.5	748.5	733
	0.147	738.5	745.5	733.5
	0.148	740.5	747	733.5
	0.149	741	748	732.5
	0.15	740	744.5	735
	0.151	737	749.5	732
	0.152	739	746.5	731.5
	0.153	741	748	733.5
	0.154	739.5	747.5	736
	0.155	741	746.5	738
	0.156	741.5	746	733.5
	0.157	745	747.5	732.5
	0.158	741	749.5	735
	0.159	743	744.5	733.5
	0.16	742.5	747.5	738.5
	0.161	741	746	735.5
	0.162	741	746.5	733.5
	0.163	741	746	733.5
	0.164	743	746.5	737.5
	0.165	742.5	746.5	733.5
	0.166	741.5	750	737
	0.167	742.5	751.5	733.5
	0.168	743.5	748	736.5
	0.169	744	747.5	736
	0.17	744.5	746	738
	0.171	745.5	746.5	737.5
	0.172	747	746	736
	0.173	745.5	746.5	737.5
	0.174	746.5	747	737
	0.175	748.5	748	733.5
	0.176	745.5	745.5	739
	0.177	748.5	747	738.5
	0.178	745.5	746	733.5
	0.179	743	747.5	737.5
	0.18	742.5	744.5	736.5
	0.181	746.5	746.5	736
	0.182	745.5	747	737.5
	0.183	748	745.5	736.5
	0.184	747.5	746	738
	0.185	746.5	745.5	737
	0.186	744.5	744	737.5
	0.187	748	745.5	738.5
	0.188	745	745.5	735.5
	0.189	746.5	744.5	739
	0.19	747.5	746.5	737.5
	0.191	744	745.5	739
	0.192	742.5	745.5	737
	0.193	745.5	745.5	738.5
	0.194	747	744.5	739
	0.195	744	749.5	736
	0.196	744	744.5	739
	0.197	743.5	746.5	738
	0.198	744	746	742
	0.199	743.5	742	740.5
	0.2	744	745.5	739
	0.201	741.5	747	739.5
	0.202	741	746.5	745.5
	0.203	742	745.5	738
	0.204	742	746	745
	0.205	743.5	746	740
	0.206	742	746.5	742
	0.207	739	743.5	743
	0.208	739	742	740
	0.209	737.5	744.5	742
	0.21	738.5	743	743
	0.211	738.5	742.5	742.5
	0.212	739.5	742.5	741
	0.213	738	744.5	743.5
	0.214	733.5	743	747
	0.215	735.5	747	744
	0.216	735.5	741.5	745.5
	0.217	736.5	741	745.5
	0.218	733.5	742.5	743
	0.219	737	745	743
	0.22	737	744	746.5
	0.221	733.5	744	746.5
	0.222	735	748	745.5
	0.223	736.5	741.5	750.5
	0.224	731.5	742	746.5
	0.225	733.5	743	748
	0.226	733	739.5	745.5
	0.227	736	745	748.5
	0.228	733.5	745	751
	0.229	732.5	745.5	750.5
	0.23	733.5	743	750
	0.231	731.5	744.5	748
	0.232	730	746	748.5
	0.233	733.5	747	752
	0.234	731.5	743.5	747
	0.235	732	743.5	748.5
	0.236	733.5	743.5	750
	0.237	733	750.5	748
	0.238	733.5	745.5	750
	0.239	735.5	748	751
	0.24	733.5	744.5	750.5
	0.241	733.5	746.5	751
	0.242	735	746.5	752
	0.243	731.5	752	754
	0.244	733	747	752
	0.245	737.5	746.5	751.5
	0.246	732	747.5	750.5
	0.247	737.5	750	752
	0.248	737.5	748	751.5
	0.249	733.5	750.5	752
	0.25	736.5	750.5	751.5
	0.251	733.5	751	753.5
	0.252	733.5	756	758
	0.253	735.5	750	753
	0.254	733.5	754.5	751.5
	0.255	740	753	754.5
	0.256	738	754	748.5
	0.257	738.5	753.5	751.5
	0.258	735.5	752	752
	0.259	738.5	752	752
	0.26	739	752.5	752
	0.261	740	753	748.5
	0.262	733.5	758	752
	0.263	739	754	750
	0.264	740	752	752.5
	0.265	737.5	757.5	748
	0.266	738.5	754	750
	0.267	740	756	748.5
	0.268	738.5	753.5	748.5
	0.269	737.5	753	750.5
	0.27	738	758	750
	0.271	740	755	748.5
	0.272	740	752	751.5
	0.273	742	755.5	748.5
	0.274	738.5	755	751
	0.275	742	755.5	749.5
	0.276	739	755.5	750.5
	0.277	738	753.5	747.5
	0.278	743.5	750	744.5
	0.279	740	750	746.5
	0.28	741	754.5	746.5
	0.281	739.5	753.5	745.5
	0.282	740.5	751.5	747.5
	0.283	742	752	750
	0.284	743	750.5	745.5
	0.285	741	753.5	742.5
	0.286	741	750.5	742.5
	0.287	746	752	741.5
	0.288	738	748	744.5
	0.289	739	748.5	743.5
	0.29	745	748.5	743
	0.291	740.5	747	746
	0.292	736.5	747	744
	0.293	738.5	746	742.5
	0.294	742	745	743
	0.295	745	746	739
	0.296	741	745	743.5
	0.297	740	746	744
	0.298	742.5	744	744.5
	0.299	742.5	743.5	741.5
	0.3	739	740.5	741.5
	0.301	741	739	742.5
	0.302	739	739.5	742.5
	0.303	744	739.5	744
	0.304	742	733.5	738.5
	0.305	742	738	741
	0.306	744	735.5	746
	0.307	741	735.5	738.5
	0.308	739.5	738.5	743.5
	0.309	742.5	733.5	740
	0.31	746.5	738	739.5
	0.311	741	733.5	741.5
	0.312	743	732.5	741
	0.313	742	731	743
	0.314	743	731	737
	0.315	745.5	733.5	743
	0.316	744.5	730	742.5
	0.317	741	728.5	738.5
	0.318	741.5	729.5	741.5
	0.319	740.5	731.5	739.5
	0.32	743	729	743
	0.321	741.5	728	738.5
	0.322	743.5	725	741
	0.323	742	725	742
	0.324	740.5	727.5	742.5
	0.325	743.5	726	742
	0.326	744	726	741
	0.327	742.5	724	742
	0.328	742.5	723.5	742.5
	0.329	742	722	741.5
	0.33	743	726	741.5
	0.331	744	722.5	747
	0.332	742.5	725	742.5
	0.333	743	718.5	742
	0.334	744.5	722.5	741
	0.335	739	722	746
	0.336	745.5	718.5	746
	0.337	745	723	742.5
	0.338	744.5	720.5	742.5
	0.339	743	718.5	741.5
	0.34	744	718.5	745
	0.341	744	717	744.5
	0.342	742.5	725	743.5
	0.343	741	718.5	743.5
	0.344	739.5	721.5	745
	0.345	745	717.5	747.5
	0.346	740	718	742.5
	0.347	742	718	748
	0.348	745	716.5	746
	0.349	740	718	744.5
	0.35	743	718	748
	0.351	740	718.5	747.5
	0.352	739	716.5	742
	0.353	743	718.5	743
	0.354	738.5	716.5	742
	0.355	740	717	744
	0.356	740	715	745
	0.357	744.5	715	742.5
	0.358	742.5	717.5	745.5
	0.359	744	716.5	745.5
	0.36	742.5	717	744
	0.361	739	718.5	747
	0.362	742	717	745.5
	0.363	744.5	718	744.5
	0.364	740.5	717.5	740.5
	0.365	744	717.5	747
	0.366	742.5	718	747
	0.367	742.5	713.5	745.5
	0.368	738.5	718	744.5
	0.369	741.5	715.5	750
	0.37	742.5	717	746.5
	0.371	739	716	746
	0.372	741.5	715.5	745
	0.373	740.5	714	741.5
	0.374	743	715.5	744.5
	0.375	741.5	718	746.5
	0.376	741	715	749.5
	0.377	741	715.5	748
	0.378	739.5	717.5	744.5
	0.379	742	714	748
	0.38	739	715.5	747.5
	0.381	744	713	744
	0.382	742.5	715.5	746.5
	0.383	736.5	714	748.5
	0.384	739	714	745.5
	0.385	740.5	714	748
	0.386	738.5	717.5	745.5
	0.387	741.5	715.5	745.5
	0.388	739	716	745
	0.389	741	716.5	748.5
	0.39	744	712	745.5
	0.391	736.5	712.5	747.5
	0.392	739.5	714	747.5
	0.393	740.5	712.5	746.5
	0.394	736	713	748
	0.395	741.5	717.5	744
	0.396	740	714.5	748.5
	0.397	736	714.5	747
	0.398	738	715	748
	0.399	736.5	716.5	749.5
	0.4	737.5	717.5	747.5
	0.401	739	717	748.5
	0.402	736	718	747
	0.403	736.5	713.5	748
	0.404	737	718	749
	0.405	737	715	747.5
	0.406	733.5	718.5	750.5
	0.407	740	717	750.5
	0.408	734.5	717	750.5
	0.409	738.5	718	750.5
	0.41	738	718.5	748.5
	0.411	736.5	718	750.5
	0.412	738	718.5	745.5
	0.413	737.5	721.5	747.5
	0.414	733.5	718.5	747.5
	0.415	735.5	718.5	748.5
	0.416	738	718	746.5
	0.417	738	718	748
	0.418	736.5	718.5	749
	0.419	738	718	746
	0.42	737.5	718.5	747
	0.421	733.5	721	746.5
	0.422	736.5	721	746.5
	0.423	739.5	721.5	748
	0.424	738.5	720.5	748.5
	0.425	737.5	721.5	747.5
	0.426	737	722	754
	0.427	738.5	724.5	748
	0.428	736.5	723	745.5
	0.429	740	721.5	745.5
	0.43	738.5	724.5	746.5
	0.431	733.5	725	745.5
	0.432	738.5	724.5	745
	0.433	735.5	724	747.5
	0.434	738.5	726	746.5
	0.435	741	725	746
	0.436	740	725.5	747
	0.437	741.5	725	744
	0.438	742.5	723.5	745.5
	0.439	739.5	728	744
	0.44	741	726	745
	0.441	743.5	723	745
	0.442	743.5	727	744.5
	0.443	742	730	745.5
	0.444	741	732	745.5
	0.445	742	729.5	742
	0.446	746	730	741.5
	0.447	745.5	730	741
	0.448	741.5	732	744
	0.449	742.5	731.5	740
	0.45	745	732.5	739.5
	0.451	742	730	739.5
	0.452	742	732.5	741
	0.453	739.5	731.5	740
	0.454	742	736.5	740.5
	0.455	741.5	737.5	739
	0.456	741	733.5	738.5
	0.457	743	738.5	742
	0.458	743	741	737.5
	0.459	742.5	738	738.5
	0.46	744.5	738.5	740
	0.461	742	738.5	735.5
	0.462	743	737.5	733.5
	0.463	740.5	738.5	733.5
	0.464	745	745.5	736.5
	0.465	745.5	739	737
	0.466	741.5	745.5	733.5
	0.467	743	743	733.5
	0.468	743	741	733.5
	0.469	740	743	735.5
	0.47	741	744.5	733
	0.471	741	745	733.5
	0.472	742	742.5	733.5
	0.473	741	744.5	731.5
	0.474	741.5	747	729
	0.475	737.5	748	731.5
	0.476	743	746	732
	0.477	743	743.5	732
	0.478	738.5	746	728.5
	0.479	737.5	745.5	730
	0.48	739	746	730.5
	0.481	738	743.5	727
	0.482	738.5	746	727
	0.483	742	750	731.5
	0.484	739.5	745.5	727.5
	0.485	738	747.5	729.5
	0.486	741	745	726
	0.487	739	746.5	729
	0.488	736.5	748.5	731
	0.489	738.5	748.5	726
	0.49	738.5	750	726
	0.491	739	752	725.5
	0.492	733.5	745.5	727.5
	0.493	738	746.5	725
	0.494	737.5	747.5	724
	0.495	736	748.5	720.5
	0.496	739	748.5	723.5
	0.497	736	744.5	726
	0.498	740	746.5	725
	0.499	738	751.5	721.5
	0.5	736	747.5	725.5
	0.501	738.5	748.5	726
	0.502	738.5	746.5	726.5
	0.503	736	746	721
	0.504	732	745.5	727.5
	0.505	738.5	745.5	724.5
	0.506	737.5	748	729.5
	0.507	739	750	723
	0.508	735	746	721.5
	0.509	733.5	746.5	723
	0.51	738.5	747.5	722
	0.511	736.5	748	725
	0.512	733.5	751	723
	0.513	741.5	747.5	722.5
	0.514	738.5	748	718.5
	0.515	741	750.5	722
	0.516	738.5	750.5	722.5
	0.517	736	748.5	722.5
	0.518	739.5	748.5	722.5
	0.519	733.5	752	723.5
	0.52	738.5	750.5	723.5
	0.521	738	748.5	724.5
	0.522	733.5	751.5	722
	0.523	738.5	751	722
	0.524	735.5	752	724.5
	0.525	738	751.5	722
	0.526	737.5	749.5	724.5
	0.527	735.5	753	726
	0.528	738.5	750.5	725
	0.529	738.5	752	718.5
	0.53	739	751	718.5
	0.531	741	751	724
	0.532	740.5	750	725
	0.533	740.5	747.5	718.5
	0.534	740	751	724.5
	0.535	735.5	750.5	728
	0.536	738.5	749	723.5
	0.537	738.5	747	727.5
	0.538	737.5	752	725
	0.539	739.5	748.5	725
	0.54	740	752	727
	0.541	742	750	725
	0.542	743	750.5	726
	0.543	740.5	746.5	727.5
	0.544	739.5	750.5	725
	0.545	738.5	748.5	728.5
	0.546	743	750.5	726.5
	0.547	739.5	748.5	727
	0.548	739	751.5	730.5
	0.549	738.5	750.5	728
	0.55	742.5	750.5	727.5
	0.551	739.5	750	728.5
	0.552	742	747	731.5
	0.553	740	747.5	725
	0.554	742.5	748	730.5
	0.555	738.5	747.5	726
	0.556	737.5	746.5	733.5
	0.557	739.5	744.5	730.5
	0.558	737.5	745.5	727.5
	0.559	736	743	732.5
	0.56	744	746	731
	0.561	737	746.5	733.5
	0.562	737	746	728
	0.563	742.5	744.5	731.5
	0.564	733.5	746.5	731.5
	0.565	738.5	744	732.5
	0.566	738.5	743	735
	0.567	741.5	745.5	733.5
	0.568	737	743	735
	0.569	737	745	731.5
	0.57	739	743	733.5
	0.571	735.5	739	733.5
	0.572	735	740.5	733
	0.573	736	744	733.5
	0.574	737	740	733.5
	0.575	736.5	739.5	733.5
	0.576	738	738	737
	0.577	740	738.5	733.5
	0.578	737.5	741	731
	0.579	733	736.5	738
	0.58	737	738	733.5
	0.581	738.5	737.5	735.5
	0.582	738.5	738.5	738.5
	0.583	738.5	737.5	732.5
	0.584	733.5	733.5	736
	0.585	733	733.5	738.5
	0.586	733.5	735.5	737.5
	0.587	735.5	737	738.5
	0.588	737.5	733.5	739.5
	0.589	733.5	733.5	738.5
	0.59	732.5	730	740.5
	0.591	738	733.5	738.5
	0.592	733.5	733	740
	0.593	736.5	735.5	738.5
	0.594	733	733.5	737.5
	0.595	736	733.5	739
	0.596	736.5	732.5	738.5
	0.597	736.5	733.5	742.5
	0.598	736	733	739.5
	0.599	736	729.5	741.5
	0.6	735.5	731.5	740
	0.601	733	726.5	740
	0.602	737	730	742.5
	0.603	733	731	743
	0.604	732.5	731.5	744
	0.605	732	729.5	743.5
	0.606	736	731.5	743.5
	0.607	733.5	730.5	739
	0.608	731.5	727.5	739
	0.609	733.5	727	743
	0.61	733.5	726	742.5
	0.611	733.5	724	747.5
	0.612	735.5	730	744
	0.613	731	728	743.5
	0.614	733.5	731	745.5
	0.615	732	728.5	744.5
	0.616	733.5	728	744
	0.617	733.5	728	744.5
	0.618	737	727	745.5
	0.619	733.5	723	743
	0.62	733.5	725	747
	0.621	735	726	745.5
	0.622	731.5	725	743
	0.623	738.5	724.5	745
	0.624	735	725.5	745.5
	0.625	732	728.5	746.5
	0.626	736.5	727	745.5
	0.627	733.5	725	741
	0.628	736.5	726	748
	0.629	735.5	727	745.5
	0.63	739	727	746
	0.631	737.5	729	748.5
	0.632	733.5	726.5	747
	0.633	736.5	724	746.5
	0.634	736.5	728	745
	0.635	733.5	725	746
	0.636	737.5	725	748.5
	0.637	736.5	727	745.5
	0.638	736	725	746.5
	0.639	733.5	726	748.5
	0.64	738	725.5	745.5
	0.641	739	725	742.5
	0.642	737	726	742
	0.643	737.5	726	745.5
	0.644	735	725	745.5
	0.645	732.5	726	745
	0.646	735.5	726	747
	0.647	737	724	745.5
	0.648	738	725.5	745
	0.649	737	727	744
	0.65	741	724.5	742.5
	0.651	733.5	726	745
	0.652	735.5	723.5	745
	0.653	737	725.5	748
	0.654	738	727	747
	0.655	737	727.5	744
	0.656	738	725	745.5
	0.657	738	722	746.5
	0.658	738	721.5	742.5
	0.659	737.5	724	744
	0.66	738.5	723	743.5
	0.661	736	724.5	746.5
	0.662	732.5	723.5	745.5
	0.663	737	722	742
	0.664	736	723	744.5
	0.665	736	721	746
	0.666	740	723	745
	0.667	737	718	745.5
	0.668	733.5	722.5	745
	0.669	733.5	724.5	743
	0.67	735	718.5	743.5
	0.671	738	726.5	742.5
	0.672	738.5	722	741.5
	0.673	733.5	721.5	745
	0.674	738.5	718.5	744.5
	0.675	735	718.5	738.5
	0.676	736.5	721.5	738.5
	0.677	737	718.5	744
	0.678	735	722.5	741.5
	0.679	733.5	718.5	742
	0.68	736	718.5	740
	0.681	738	718.5	741.5
	0.682	733.5	718.5	742
	0.683	738.5	717	742
	0.684	733	722	739
	0.685	740.5	717	741.5
	0.686	736.5	722.5	739
	0.687	737	717	743
	0.688	733.5	716	736.5
	0.689	736.5	716	741
	0.69	733.5	715	737.5
	0.691	737.5	718	739
	0.692	739.5	718.5	740.5
	0.693	738	714.5	742.5
	0.694	737	715.5	739.5
	0.695	739	712.5	737.5
	0.696	736.5	715	737.5
	0.697	738	715	740
	0.698	737	713.5	739.5
	0.699	738.5	715	738.5
	0.7	737.5	715	736
	0.701	739.5	711	737.5
	0.702	736.5	711.5	733
	0.703	733.5	706.5	737.5
	0.704	740	711	738.5
	0.705	739.5	711	738
	0.706	738	707.5	733
	0.707	738.5	709	737.5
	0.708	738.5	711	737
	0.709	738.5	708.5	738.5
	0.71	736	706	737.5
	0.711	736.5	705.5	733.5
	0.712	740	704	731.5
	0.713	737.5	707.5	729.5
	0.714	736.5	704.5	736.5
	0.715	740	705.5	733
	0.716	738.5	704	733.5
	0.717	737	700	736
	0.718	738.5	701.5	731
	0.719	739.5	700	733
	0.72	741	701	731.5
	0.721	737.5	700.5	733.5
	0.722	738.5	702.5	733
	0.723	738.5	699	732.5
	0.724	733.5	695.5	731.5
	0.725	740	700	733.5
	0.726	743.5	697	733.5
	0.727	738.5	696.5	732
	0.728	739.5	699.5	731.5
	0.729	739	694	729.5
	0.73	738.5	696	729
	0.731	740.5	699.5	730
	0.732	742	696	729.5
	0.733	738.5	694.5	731.5
	0.734	741.5	695	731
	0.735	741.5	693.5	731.5
	0.736	737.5	694.5	731
	0.737	741	693.5	731.5
	0.738	742	695.5	728.5
	0.739	740	695	731.5
	0.74	738	694.5	727
	0.741	738.5	696.5	726
	0.742	741.5	694.5	726.5
	0.743	740.5	693	729
	0.744	739	689	727.5
	0.745	740.5	693.5	725.5
	0.746	743.5	692	728
	0.747	741.5	694.5	724
	0.748	740	693	727.5
	0.749	739.5	696.5	723.5
	0.75	743	698	725
	0.751	738.5	693.5	727
	0.752	738	695	726
	0.753	740	698	726
	0.754	742	697.5	724.5
	0.755	739.5	697.5	725.5
	0.756	742	699.5	721
	0.757	739	698.5	725
	0.758	740.5	701	724
	0.759	744	701.5	725.5
	0.76	741.5	700.5	718.5
	0.761	740.5	704	724.5
	0.762	739.5	704	724
	0.763	743.5	704.5	724
	0.764	742	704.5	724
	0.765	741	706.5	724.5
	0.766	740.5	707.5	724
	0.767	742.5	708	725
	0.768	743	708	725
	0.769	742.5	708.5	727
	0.77	742	711	729
	0.771	739.5	711.5	724.5
	0.772	745	715	725.5
	0.773	742	713	724
	0.774	742	715	725.5
	0.775	742	718	718.5
	0.776	741.5	718	723
	0.777	741.5	718.5	724
	0.778	745	722.5	725
	0.779	745	718.5	723.5
	0.78	743	718.5	725
	0.781	741	724	724.5
	0.782	743.5	724	725
	0.783	742.5	725.5	726
	0.784	745	729	726
	0.785	743	729.5	723.5
	0.786	744	731	728
	0.787	745	728	724.5
	0.788	746.5	731.5	725
	0.789	744.5	732	725
	0.79	743	735.5	727.5
	0.791	742.5	736.5	726
	0.792	743.5	736.5	724
	0.793	743.5	737.5	724
	0.794	744	738	722.5
	0.795	743	738	723
	0.796	739.5	742	722
	0.797	743	740.5	724.5
	0.798	741.5	745	725.5
	0.799	743	739	725.5
	0.8	738.5	744	727.5
	0.801	745	743.5	722.5
	0.802	739.5	745	725
	0.803	740	744.5	723.5
	0.804	740	752	723
	0.805	741.5	748.5	728
	0.806	742	751	725
	0.807	738.5	746.5	726
	0.808	744	751.5	724.5
	0.809	738.5	752.5	724.5
	0.81	739	753.5	722.5
	0.811	737	752	728
	0.812	741	753.5	727
	0.813	738.5	754	723.5
	0.814	738	757	725
	0.815	740	754	725.5
	0.816	740	756.5	729
	0.817	739	760.5	724.5
	0.818	738.5	759	726
	0.819	736	762.5	723.5
	0.82	738.5	759	725.5
	0.821	737.5	761	725.5
	0.822	737.5	760.5	724.5
	0.823	737.5	767	725
	0.824	738.5	765.5	727.5
	0.825	739.5	767.5	721.5
	0.826	738.5	765	726
	0.827	738.5	765	728.5
	0.828	740	767	727.5
	0.829	733.5	769.5	727.5
	0.83	737.5	768	726.5
	0.831	736.5	769	724
	0.832	733.5	769.5	725.5
	0.833	741	772.5	727.5
	0.834	737	773.5	726
	0.835	739	772.5	726.5
	0.836	736	772.5	728.5
	0.837	737	777.5	726
	0.838	737	773.5	722.5
	0.839	739	778	725
	0.84	736.5	778	725.5
	0.841	735.5	778.5	725
	0.842	741	775	726.5
	0.843	737.5	777.5	727
	0.844	739.5	778.5	727
	0.845	741	777.5	726
	0.846	738.5	782	726
	0.847	738.5	778.5	725
	0.848	736.5	778.5	724.5
	0.849	736.5	778.5	724.5
	0.85	738.5	785	725
	0.851	735.5	783.5	725
	0.852	736	781	728
	0.853	735.5	778.5	724
	0.854	736	784	725
	0.855	735.5	783.5	723.5
	0.856	736	782.5	726
	0.857	740	781	726
	0.858	736	786.5	725
	0.859	738.5	784.5	724
	0.86	735.5	786	728
	0.861	736.5	786.5	725.5
	0.862	733.5	784.5	727.5
	0.863	732.5	787	727.5
	0.864	737	786.5	727
	0.865	738	784	727
	0.866	736.5	782	728
	0.867	737	787	725.5
	0.868	733.5	781.5	728
	0.869	739	787	726
	0.87	738.5	786.5	728.5
	0.871	735	782	725
	0.872	736	782	725
	0.873	732.5	784	732
	0.874	736	784	730
	0.875	735	783.5	729
	0.876	732.5	784	729
	0.877	733	782.5	731.5
	0.878	733	778.5	730.5
	0.879	735.5	784	728.5
	0.88	733	784.5	730.5
	0.881	733.5	784	733.5
	0.882	733.5	781.5	731.5
	0.883	733.5	778	732
	0.884	733.5	778.5	729
	0.885	733.5	778.5	731.5
	0.886	733	778.5	735.5
	0.887	733	778.5	735
	0.888	733	773.5	733.5
	0.889	735.5	778	736
	0.89	735	777.5	733.5
	0.891	732	777.5	737.5
	0.892	732	772.5	733
	0.893	731.5	774	736
	0.894	733.5	772	737.5
	0.895	733.5	777	738.5
	0.896	731.5	776.5	740.5
	0.897	732.5	775	737
	0.898	729.5	772	737
	0.899	733.5	774.5	738.5
	0.9	730	771.5	742
	0.901	733.5	769.5	740
	0.902	732	771	741
	0.903	733.5	769	741.5
	0.904	730	771	745
	0.905	733.5	769.5	741.5
	0.906	735	765	746
	0.907	733.5	766	743.5
	0.908	733.5	765.5	741
	0.909	733.5	768	745.5
	0.91	731	764.5	744
	0.911	731	765	741
	0.912	732	760.5	744.5
	0.913	732	760	747
	0.914	731.5	761	748.5
	0.915	730	761.5	746
	0.916	729	761.5	745
	0.917	731.5	759	748.5
	0.918	729.5	757.5	745.5
	0.919	733	755.5	745.5
	0.92	729	756	748.5
	0.921	733.5	754.5	748.5
	0.922	732.5	754	751.5
	0.923	729	753.5	749
	0.924	737.5	751.5	748
	0.925	731	751	751.5
	0.926	733.5	750	748.5
	0.927	731.5	746.5	750
	0.928	731	746.5	748
	0.929	732	749.5	751
	0.93	729.5	748	751.5
	0.931	736.5	743.5	750.5
	0.932	732	742.5	752
	0.933	733.5	741	751.5
	0.934	733.5	746.5	751
	0.935	731.5	741.5	752.5
	0.936	736	741	753.5
	0.937	736.5	738.5	751.5
	0.938	736	737.5	752.5
	0.939	733	739	756
	0.94	732.5	737.5	753.5
	0.941	731.5	737	754
	0.942	738.5	737	755
	0.943	738.5	733.5	753
	0.944	737	733.5	755.5
	0.945	738.5	733.5	755.5
	0.946	737.5	736	756
	0.947	736.5	731	756.5
	0.948	738	731.5	756.5
	0.949	735	729.5	755.5
	0.95	738.5	733.5	756
	0.951	742	729.5	758
	0.952	736.5	730.5	759.5
	0.953	739	727	759.5
	0.954	738	728	761
	0.955	738.5	729	758
	0.956	739	726	760
	0.957	737.5	727.5	759
	0.958	737.5	728.5	762
	0.959	737.5	724	760
	0.96	739	724	763
	0.961	737.5	724.5	759
	0.962	740	722	759.5
	0.963	738.5	723.5	762.5
	0.964	741	724	759.5
	0.965	739.5	722	760
	0.966	743	718.5	762
	0.967	739.5	722	760.5
	0.968	742.5	722	763.5
	0.969	740	718.5	762
	0.97	740	725	760.5
	0.971	741.5	718.5	763.5
	0.972	741	716	765.5
	0.973	743.5	721.5	762.5
	0.974	742.5	718.5	761.5
	0.975	743	723	760
	0.976	742.5	721	760
	0.977	743.5	718.5	761.5
	0.978	742	718.5	761.5
	0.979	744	721.5	762
	0.98	745	718	757.5
	0.981	743.5	718.5	759
	0.982	745.5	714	759
	0.983	743	718.5	759
	0.984	742	717.5	757
	0.985	741	718	757
	0.986	738.5	718	756
	0.987	743	718.5	759.5
	0.988	742	718.5	756
	0.989	742	718.5	758
	0.99	739	715	758
	0.991	742.5	717	754.5
	0.992	745.5	718.5	755.5
	0.993	742	718.5	752
	0.994	743	718	753.5
	0.995	742	718.5	753.5
	0.996	744	717.5	749.5
	0.997	743.5	718.5	750.5
	0.998	741.5	718.5	751.5
	0.999	745	716.5	755
	1	746.5	718.5	751
	1.001	741	717.5	750.5
	1.002	744	718.5	748.5
	1.003	740.5	718.5	750
	1.004	742	718.5	747
	1.005	738.5	722	747
	1.006	739	721	746.5
	1.007	742	721.5	748
	1.008	740	718.5	745
	1.009	740.5	721.5	744
	1.01	739.5	718	744
	1.011	743	722.5	743
	1.012	742.5	725	745.5
	1.013	741	723	743
	1.014	745	718.5	743
	1.015	742.5	718.5	744.5
	1.016	742	718.5	741
	1.017	744	726	744
	1.018	742.5	724.5	742
	1.019	738.5	727	745
	1.02	741	725.5	745
	1.021	738.5	725	740
	1.022	739.5	725	738.5
	1.023	740	725	740.5
	1.024	739	725.5	742.5
	1.025	739.5	727	737.5
	1.026	739.5	728.5	736.5
	1.027	739	728.5	738.5
	1.028	740	725	736
	1.029	738.5	728	737.5
	1.03	741	728	740
	1.031	738.5	731	740.5
	1.032	741	732	735
	1.033	740.5	732	738
	1.034	741	730.5	738.5
	1.035	738.5	736	740
	1.036	738.5	733.5	738.5
	1.037	738.5	733.5	735.5
	1.038	738.5	732	738.5
	1.039	740.5	732.5	737.5
	1.04	738	733.5	737
	1.041	741.5	731.5	741
	1.042	740	732	737.5
	1.043	736.5	733.5	739
	1.044	738.5	735	741
	1.045	738.5	735.5	737
	1.046	739	736	736
	1.047	738	737.5	737.5
	1.048	738.5	737	742
	1.049	735.5	736.5	736
	1.05	736.5	735.5	741
	1.051	733.5	738	736
	1.052	738	738.5	737
	1.053	736	733.5	737
	1.054	736	739.5	739
	1.055	736	740	737.5
	1.056	736	739	735.5
	1.057	735.5	737.5	735.5
	1.058	733.5	739.5	737.5
	1.059	733	740.5	738.5
	1.06	736.5	739.5	740
	1.061	736.5	740.5	741
	1.062	737.5	743.5	738
	1.063	736.5	741	738
	1.064	731.5	742.5	736
	1.065	733.5	742	744.5
	1.066	733	741.5	739
	1.067	737	741	740
	1.068	733	742.5	737
	1.069	733.5	743.5	739.5
	1.07	730.5	744	737.5
	1.071	731.5	743	739.5
	1.072	731.5	742	737
	1.073	731	741	738
	1.074	731	745	736
	1.075	731.5	745.5	739.5
	1.076	731.5	744.5	741
	1.077	726	743.5	740
	1.078	733.5	744.5	738.5
	1.079	729	745	737
	1.08	732	746.5	738.5
	1.081	728.5	745	738.5
	1.082	732.5	746	736.5
	1.083	727.5	744	739.5
	1.084	729.5	743	738.5
	1.085	731	744.5	739
	1.086	727.5	742.5	742
	1.087	729	743.5	738
	1.088	730.5	742.5	741
	1.089	729.5	743.5	738.5
	1.09	725	745.5	740.5
	1.091	726	745.5	741.5
	1.092	728.5	744.5	741.5
	1.093	727.5	745	737.5
	1.094	727	743	740
	1.095	727	743	738.5
	1.096	727.5	746	740
	1.097	730.5	743	737.5
	1.098	728	743	742
	1.099	730.5	744.5	739
	1.1	726	741.5	740.5
	1.101	729.5	743	739
	1.102	726.5	741.5	739
	1.103	726.5	741	744
	1.104	724.5	738.5	744.5
	1.105	724	742.5	740.5
	1.106	722.5	741	738.5
	1.107	726.5	742	741.5
	1.108	722.5	742	745
	1.109	723.5	739	743
	1.11	726	741.5	740
	1.111	722.5	743.5	742
	1.112	725	741	745
	1.113	726	742	740.5
	1.114	723	739	739.5
	1.115	723.5	741	741.5
	1.116	722	737.5	739.5
	1.117	723.5	740	742
	1.118	718.5	738.5	744.5
	1.119	724.5	741	744
	1.12	718.5	741	742
	1.121	722.5	738	741.5
	1.122	723	742	743
	1.123	722	740	740.5
	1.124	718.5	737.5	735.5
	1.125	721.5	740.5	742
	1.126	718.5	739	741
	1.127	723.5	738	738.5
	1.128	718.5	737	742.5
	1.129	718.5	740.5	737
	1.13	721.5	737.5	737
	1.131	718.5	740.5	739.5
	1.132	718.5	740.5	740
	1.133	721	741	739
	1.134	718.5	741	739
	1.135	718.5	738.5	740.5
	1.136	718.5	740	738.5
	1.137	717	738.5	740
	1.138	718	739.5	738.5
	1.139	717.5	738	739
	1.14	722	740.5	737.5
	1.141	718	738.5	738.5
	1.142	717	738.5	733.5
	1.143	716	737	738.5
	1.144	713	736.5	737.5
	1.145	714.5	739	738.5
	1.146	718	738.5	736.5
	1.147	717.5	737	733.5
	1.148	713	742.5	737
	1.149	717	737.5	736
	1.15	716.5	737.5	736.5
	1.151	716.5	738.5	735
	1.152	714	740	733.5
	1.153	715	737	740
	1.154	715	737.5	732.5
	1.155	716	739	733.5
	1.156	714	738	733
	1.157	714.5	740.5	735
	1.158	713	738.5	731.5
	1.159	717.5	738.5	732
	1.16	714.5	738.5	735
	1.161	718	737	733.5
	1.162	711	742	733.5
	1.163	714	740	733
	1.164	716.5	738.5	733.5
	1.165	715	738	733.5
	1.166	709.5	738.5	730
	1.167	716	733.5	733.5
	1.168	711.5	739.5	733
	1.169	715	737	733.5
	1.17	711.5	738.5	732.5
	1.171	712.5	738	732
	1.172	715	738.5	732
	1.173	713	736.5	733.5
	1.174	715	736	733.5
	1.175	713.5	739	731.5
	1.176	714	738	733.5
	1.177	711.5	733.5	733.5
	1.178	713.5	736	733.5
	1.179	713	737.5	733
	1.18	712.5	738.5	730
	1.181	711	735.5	732.5
	1.182	709.5	739	730.5
	1.183	712.5	738	733.5
	1.184	714.5	738	729.5
	1.185	714.5	736	730.5
	1.186	714	736	736.5
	1.187	712	733.5	733.5
	1.188	714	740	732
	1.189	714	737.5	735
	1.19	713.5	733.5	733
	1.191	713	736.5	733.5
	1.192	712	735.5	738
	1.193	714.5	738.5	735.5
	1.194	711	739.5	733.5
	1.195	716	737.5	740
	1.196	715.5	737.5	736.5
	1.197	714	739	738.5
	1.198	718	739	738.5
	1.199	713.5	738	738.5
	1.2	713.5	737.5	741.5
	1.201	717	735.5	738.5
	1.202	713	735.5	736.5
	1.203	718.5	740.5	739.5
	1.204	713	740	743.5
	1.205	718.5	739	740.5
	1.206	715	739	744.5
	1.207	718.5	738.5	743.5
	1.208	718.5	737	742.5
	1.209	716.5	733.5	743.5
	1.21	718.5	740.5	741.5
	1.211	718	740	741
	1.212	722.5	739	743
	1.213	722.5	740.5	745
	1.214	717.5	738.5	742
	1.215	718.5	739.5	745
	1.216	722	741	746
	1.217	718.5	737.5	745.5
	1.218	723	740.5	745
	1.219	722	739	743
	1.22	724	738.5	745
	1.221	724.5	738.5	740
	1.222	722.5	739	745.5
	1.223	724	740	748.5
	1.224	724.5	738.5	742.5
	1.225	727.5	744.5	744.5
	1.226	727	742	747
	1.227	727	741	741.5
	1.228	727	740.5	746.5
	1.229	731.5	740.5	744
	1.23	729	742	742
	1.231	730	740	745.5
	1.232	733.5	741.5	746
	1.233	733.5	745.5	745.5
	1.234	733.5	740.5	742.5
	1.235	733.5	741.5	744.5
	1.236	737	746.5	741
	1.237	738.5	748.5	743
	1.238	740	745.5	743.5
	1.239	745	748	743
	1.24	740.5	748.5	742
	1.241	743	748.5	742
	1.242	745.5	746	743
	1.243	745	748.5	740
	1.244	746	747	743.5
	1.245	749	744	739
	1.246	749.5	751.5	742
	1.247	750	747	740.5
	1.248	747	748.5	738.5
	1.249	751.5	746.5	738.5
	1.25	751	746.5	740.5
	1.251	754	745.5	737.5
	1.252	755	750	742
	1.253	753.5	751.5	737
	1.254	757	746	738.5
	1.255	754.5	747.5	740.5
	1.256	757	743.5	741
	1.257	758.5	748	738
	1.258	759	745.5	741.5
	1.259	760.5	748.5	739.5
	1.26	760.5	746	740
	1.261	759	746.5	740
	1.262	765	748	741.5
	1.263	767.5	746.5	737.5
	1.264	764.5	745.5	738
	1.265	768	743	741
	1.266	766	744.5	737.5
	1.267	766.5	747	738.5
	1.268	772	744	738.5
	1.269	770.5	743	740
	1.27	769	742.5	736.5
	1.271	768.5	742	738.5
	1.272	773	740.5	739.5
	1.273	768.5	740.5	738.5
	1.274	776	744.5	739
	1.275	772	740	738.5
	1.276	773	742	737
	1.277	774	740.5	737
	1.278	774	740	739.5
	1.279	773.5	742.5	739
	1.28	775.5	740.5	743
	1.281	773.5	743	739.5
	1.282	774	740.5	744
	1.283	773	737.5	742
	1.284	773	739	741
	1.285	776	738.5	743
	1.286	775	737	742.5
	1.287	776	736	743.5
	1.288	776.5	738.5	742
	1.289	778.5	737.5	741.5
	1.29	775.5	738.5	742.5
	1.291	776	736.5	744
	1.292	778	736.5	744
	1.293	775.5	734.5	746
	1.294	777	738.5	744.5
	1.295	774	736.5	743
	1.296	775.5	737	748
	1.297	778.5	731.5	746
	1.298	773	733.5	748.5
	1.299	776	736.5	746
	1.3	775.5	733.5	748.5
	1.301	776.5	733.5	746
	1.302	771	732	750
	1.303	772.5	732	751.5
	1.304	775.5	733.5	752
	1.305	771.5	731.5	750.5
	1.306	773	733	750
	1.307	771.5	735	752
	1.308	767	735.5	752
	1.309	774	733	752.5
	1.31	770	732.5	752
	1.311	772	733	753.5
	1.312	768.5	736	754.5
	1.313	770.5	733	753
	1.314	769.5	737	750
	1.315	770.5	732.5	754.5
	1.316	770.5	732.5	750
	1.317	769	733	755
	1.318	765.5	733.5	752
	1.319	770.5	738	752
	1.32	763.5	736	755
	1.321	766	737	751
	1.322	763.5	733.5	752
	1.323	765	733.5	751
	1.324	765	737.5	749.5
	1.325	764.5	736.5	752
	1.326	765.5	733.5	751.5
	1.327	760.5	737	751
	1.328	762	735.5	753.5
	1.329	760	733.5	752
	1.33	759.5	737.5	750.5
	1.331	762.5	736.5	748.5
	1.332	762.5	739.5	747
	1.333	758.5	738.5	750.5
	1.334	756.5	736.5	752
	1.335	759.5	742	750.5
	1.336	757.5	740.5	750.5
	1.337	757	738.5	747.5
	1.338	760	741.5	748.5
	1.339	756	739	750
	1.34	756	742	746.5
	1.341	757	738.5	747.5
	1.342	753.5	743	748
	1.343	752.5	743	746.5
	1.344	752	742	747
	1.345	757	741.5	745
	1.346	752	742.5	747
	1.347	750	744.5	747
	1.348	754	745	745.5
	1.349	752	744	745
	1.35	752.5	740.5	746
	1.351	749.5	744.5	745.5
	1.352	751.5	745.5	741.5
	1.353	752	746.5	744
	1.354	747.5	742	742.5
	1.355	748.5	745.5	742
	1.356	750	743.5	745
	1.357	745.5	746.5	744
	1.358	747	743.5	742
	1.359	747	745	743.5
	1.36	746.5	743.5	743.5
	1.361	748.5	745	740.5
	1.362	744	745.5	745.5
	1.363	745	748	738.5
	1.364	741.5	743	740.5
	1.365	744	745.5	742
	1.366	741	742	743
	1.367	745	745.5	741.5
	1.368	742	742.5	739.5
	1.369	743.5	740.5	742.5
	1.37	739.5	742	741
	1.371	743.5	740.5	741.5
	1.372	741	737.5	740
	1.373	739	744.5	740.5
	1.374	739	740	739
	1.375	739	741	738.5
	1.376	739	744	741
	1.377	740.5	743	741.5
	1.378	738.5	743.5	742.5
	1.379	735.5	741	738.5
	1.38	738.5	739	741
	1.381	733.5	743	741.5
	1.382	735.5	742	738.5
	1.383	731.5	739	738.5
	1.384	733.5	738.5	741
	1.385	732.5	739.5	740.5
	1.386	731.5	739	741
	1.387	728.5	741	740.5
	1.388	733.5	741.5	741
	1.389	731	742.5	742.5
	1.39	730	741	740.5
	1.391	728	744.5	742.5
	1.392	730	742	742.5
	1.393	730	738.5	741
	1.394	729	741.5	744
	1.395	730.5	744	740
	1.396	729.5	740	740.5
	1.397	729	739	743.5
	1.398	731.5	742	745
	1.399	728.5	741	743
	1.4	728.5	741.5	746.5
	1.401	729.5	739.5	739.5
	1.402	728	743.5	745.5
	1.403	727.5	740	743.5
	1.404	729.5	744.5	746
	1.405	727.5	742	744.5
	1.406	727.5	741	744
	1.407	724.5	745	743
	1.408	729	743.5	744.5
	1.409	725	741.5	743
	1.41	724.5	745	746
	1.411	724.5	742	745
	1.412	725.5	742	744
	1.413	726	744.5	744
	1.414	728.5	745.5	745.5
	1.415	724.5	743	747
	1.416	724	744	746
	1.417	718.5	744.5	745
	1.418	725	744.5	745.5
	1.419	728.5	745	745.5
	1.42	727.5	746	744
	1.421	722	740	739.5
	1.422	722.5	743	741.5
	1.423	723	744	743.5
	1.424	725	746	745.5
	1.425	723	745.5	745.5
	1.426	724.5	745.5	741.5
	1.427	722	741	744
	1.428	723.5	743.5	744
	1.429	725.5	745.5	745.5
	1.43	724.5	744	745.5
	1.431	725.5	741	739.5
	1.432	725	742.5	742
	1.433	728	742.5	742
	1.434	727.5	744	741.5
	1.435	728.5	744.5	745
	1.436	727	741	741.5
	1.437	728	744.5	743
	1.438	722.5	745	738.5
	1.439	725	739	740
	1.44	729.5	744	741.5
	1.441	728	739.5	738.5
	1.442	728	739	739.5
	1.443	724.5	742	738.5
	1.444	728	741.5	741
	1.445	723	740	737
	1.446	727.5	741	736.5
	1.447	725.5	739	738
	1.448	726.5	738.5	736
	1.449	728	744	736.5
	1.45	727.5	738.5	737.5
	1.451	727.5	741	738.5
	1.452	725	740.5	738.5
	1.453	723.5	738.5	737
	1.454	724	739	737
	1.455	727	740.5	737
	1.456	730	741	736
	1.457	727	743	735
	1.458	728	739.5	736
	1.459	730	741.5	733.5
	1.46	726.5	738.5	733.5
	1.461	727.5	739	734.5
	1.462	727	742	736
	1.463	726	739	737
	1.464	727	740.5	736
	1.465	728	740.5	732.5
	1.466	730	738.5	733.5
	1.467	730.5	737	733.5
	1.468	728.5	738.5	733
	1.469	726.5	738	733.5
	1.47	731	740	733.5
	1.471	727	733	735.5
	1.472	730.5	735.5	738.5
	1.473	728.5	737.5	735.5
	1.474	731.5	739	735.5
	1.475	728.5	736.5	733.5
	1.476	735	736.5	735
	1.477	732.5	738.5	733
	1.478	732	738.5	733.5
	1.479	733	738.5	737
	1.48	732.5	738.5	735.5
	1.481	733.5	738	737.5
	1.482	731.5	732	737
	1.483	732.5	736.5	736
	1.484	731.5	737	738
	1.485	732	737.5	736
	1.486	731.5	736.5	736
	1.487	733.5	738.5	733.5
	1.488	733.5	735.5	738.5
	1.489	733.5	738.5	733.5
	1.49	733.5	738	733.5
	1.491	733.5	733.5	733.5
	1.492	735	732.5	738.5
	1.493	738.5	735.5	738.5
	1.494	733	737.5	738.5
	1.495	733.5	737	733.5
	1.496	737	736.5	736
	1.497	736	735.5	737
	1.498	740	737	737
	1.499	736	736	737.5
	1.5	742.5	733.5	737.5
	1.501	740	737	737.5
	1.502	740	737.5	735.5
	1.503	738.5	733.5	741.5
	1.504	742.5	737.5	737
	1.505	738.5	733.5	737
	1.506	741	736.5	739.5
	1.507	742	738.5	733.5
	1.508	742.5	736.5	740.5
	1.509	742.5	737	738.5
	1.51	740.5	741	739
	1.511	742.5	737.5	735.5
	1.512	745.5	738	739.5
	1.513	746	738.5	738.5
	1.514	743.5	734.5	737
	1.515	744	737	736
	1.516	742.5	737.5	737.5
	1.517	744.5	738.5	742
	1.518	747.5	739	738.5
	1.519	747.5	739	736.5
	1.52	746	737	742
	1.521	748.5	733.5	739.5
	1.522	745	737	738.5
	1.523	747	739.5	737.5
	1.524	744	738.5	738
	1.525	747	737	736.5
	1.526	747.5	738.5	738.5
	1.527	744.5	733.5	737
	1.528	747	733.5	738.5
	1.529	747	739	737
	1.53	747.5	736.5	737.5
	1.531	745.5	738.5	738.5
	1.532	746.5	736	740
	1.533	748	738.5	735.5
	1.534	745.5	740	739
	1.535	750.5	737	741
	1.536	748	739	739.5
	1.537	747.5	737.5	738
	1.538	747.5	736	737.5
	1.539	748.5	736.5	738.5
	1.54	749.5	737.5	738
	1.541	748	735.5	738.5
	1.542	746	736	740.5
	1.543	748.5	736.5	736
	1.544	745.5	736	740
	1.545	748.5	735.5	739
	1.546	751.5	737.5	738.5
	1.547	745.5	737.5	738
	1.548	748	741	738
	1.549	746.5	736.5	739
	1.55	744.5	737.5	736
	1.551	745.5	739	737
	1.552	748	738.5	736.5
	1.553	748.5	737.5	738.5
	1.554	746.5	736.5	736.5
	1.555	748	737.5	735.5
	1.556	750.5	736.5	733.5
	1.557	748.5	738.5	737
	1.558	746.5	737.5	733.5
	1.559	746.5	740.5	735
	1.56	749	737	737
	1.561	751	738.5	735.5
	1.562	747.5	739	736.5
	1.563	746.5	742	733.5
	1.564	748	738.5	736
	1.565	750	739.5	735.5
	1.566	748.5	741	735.5
	1.567	747	739.5	735
	1.568	748	742.5	739
	1.569	746.5	742.5	737
	1.57	746.5	741	736.5
	1.571	748	741	737
	1.572	747	738.5	737.5
	1.573	745.5	740	736.5
	1.574	745.5	742	733.5
	1.575	745	743	737.5
	1.576	747.5	739.5	737.5
	1.577	746	736.5	735.5
	1.578	746	740.5	733
	1.579	744.5	743.5	739.5
	1.58	745	738.5	735.5
	1.581	748.5	738	741
	1.582	746.5	740.5	736
	1.583	748.5	741.5	733.5
	1.584	746	739	739.5
	1.585	745	742	737.5
	1.586	743.5	739	736.5
	1.587	746	740	740.5
	1.588	747.5	740.5	739.5
	1.589	745	740	738.5
	1.59	745.5	739	738.5
	1.591	747	736.5	739.5
	1.592	749.5	740.5	738
	1.593	747.5	737	738.5
	1.594	748	738.5	738.5
	1.595	746.5	736	736
	1.596	747.5	738.5	733.5
	1.597	746.5	739.5	736
	1.598	745.5	733.5	733.5
	1.599	747	737	737.5
	1.6	748	738	737
	1.601	747.5	738.5	738
	1.602	747	739	736
	1.603	746.5	741	736
	1.604	745.5	736.5	736
	1.605	748	740	733.5
	1.606	744.5	740.5	738
	1.607	746.5	739.5	733.5
	1.608	745.5	742.5	736
	1.609	745.5	738.5	740.5
	1.61	745	738	733.5
	1.611	744.5	736	733
	1.612	747.5	740	733.5
	1.613	748.5	738	732
	1.614	747	741	733.5
	1.615	745.5	740.5	733.5
	1.616	745	738.5	731
	1.617	746.5	737.5	733.5
	1.618	746	738.5	731.5
	1.619	746.5	733.5	732.5
	1.62	745	737.5	733.5
	1.621	746	738.5	731.5
	1.622	746.5	738	730.5
	1.623	746.5	738.5	728.5
	1.624	744	738.5	725
	1.625	744	739	728
	1.626	745.5	739.5	726
	1.627	744	739.5	729
	1.628	747.5	740	729.5
	1.629	742	739.5	725
	1.63	746	737.5	725.5
	1.631	747.5	737	725
	1.632	746.5	740	729
	1.633	742	739.5	724
	1.634	744.5	738.5	725
	1.635	741	737	725
	1.636	740	737.5	718.5
	1.637	743.5	740	727
	1.638	741	739.5	723
	1.639	740	739	725.5
	1.64	744.5	740	721.5
	1.641	742.5	741	724.5
	1.642	741	739	722.5
	1.643	742	740.5	718
	1.644	744	744.5	718.5
	1.645	745	740.5	725.5
	1.646	741	744	722.5
	1.647	740	742.5	718.5
	1.648	741	737.5	721
	1.649	741	740	718.5
	1.65	740	741.5	722
	1.651	741	742.5	724.5
	1.652	739	741	721
	1.653	740.5	742	718.5
	1.654	737.5	740	718.5
	1.655	738.5	738	718.5
	1.656	739	741	718.5
	1.657	737.5	740	724
	1.658	741.5	742	718.5
	1.659	737.5	742	721.5
	1.66	742.5	739	718.5
	1.661	743.5	739	718.5
	1.662	740	738.5	718.5
	1.663	741.5	738.5	718.5
	1.664	740	737.5	724.5
	1.665	741	740	718.5
	1.666	740	737.5	718.5
	1.667	740.5	739	718.5
	1.668	741	740	722
	1.669	741.5	738.5	718.5
	1.67	741	737.5	724.5
	1.671	740.5	736.5	718.5
	1.672	740	738.5	727.5
	1.673	745.5	738	722.5
	1.674	743.5	735	721.5
	1.675	742	737.5	722.5
	1.676	741.5	739	727
	1.677	741.5	739	721.5
	1.678	745	735.5	718.5
	1.679	740	733.5	726
	1.68	745	736	724.5
	1.681	741	738	726
	1.682	742	737.5	724.5
	1.683	741	738.5	727.5
	1.684	741.5	736.5	725
	1.685	744	735.5	728.5
	1.686	743	735.5	726
	1.687	740	733.5	728.5
	1.688	744.5	732	727.5
	1.689	743	737	725.5
	1.69	738.5	733.5	728.5
	1.691	745.5	736	729.5
	1.692	745	733	725.5
	1.693	748.5	732.5	727.5
	1.694	745.5	732.5	728
	1.695	745.5	731	731
	1.696	746.5	731.5	728.5
	1.697	747.5	733.5	725
	1.698	745.5	731.5	728
	1.699	744.5	733	730
	1.7	745.5	731.5	730
	1.701	746.5	733.5	731.5
	1.702	745	736.5	733.5
	1.703	746	733.5	727.5
	1.704	748.5	733.5	730
	1.705	748	733.5	731.5
	1.706	745	733.5	730.5
	1.707	746.5	735	732
	1.708	747	735.5	733.5
	1.709	747.5	736.5	731.5
	1.71	747.5	736.5	733.5
	1.711	748.5	733.5	732
	1.712	748	732	733.5
	1.713	748.5	734.5	731.5
	1.714	746	735	733
	1.715	752	730.5	732.5
	1.716	748.5	731	734.5
	1.717	747	733.5	732.5
	1.718	748	733.5	735.5
	1.719	752.5	733.5	737
	1.72	747.5	735.5	738.5
	1.721	746	733.5	733.5
	1.722	751	737	733.5
	1.723	753.5	736	736
	1.724	751.5	737.5	735.5
	1.725	750	738.5	741
	1.726	751.5	737	738
	1.727	749.5	737	735.5
	1.728	752	735	738
	1.729	749	737.5	735.5
	1.73	751.5	736.5	737.5
	1.731	750	740.5	738.5
	1.732	748.5	738	740.5
	1.733	748.5	740.5	738
	1.734	748.5	736.5	739
	1.735	752	738.5	740
	1.736	747	741	742
	1.737	747	739	742
	1.738	747	741.5	742
	1.739	748.5	738.5	741.5
	1.74	745.5	739	743.5
	1.741	748	738.5	743.5
	1.742	752	739.5	744
	1.743	750	739	743
	1.744	750	740	748
	1.745	747.5	740	747.5
	1.746	745.5	741	747
	1.747	750	743.5	747.5
	1.748	747	739	746.5
	1.749	746	744	747
	1.75	751	742	750.5
	1.751	745.5	743	749.5
	1.752	746.5	740	746.5
	1.753	746.5	739	747.5
	1.754	747.5	745.5	752
	1.755	744.5	742.5	750
	1.756	747.5	743	752.5
	1.757	744.5	742	755.5
	1.758	746	744	754
	1.759	745.5	743	753
	1.76	745	745	752
	1.761	745	744	755.5
	1.762	745	748	754
	1.763	745.5	746.5	757
	1.764	744	747.5	755.5
	1.765	745	750	754
	1.766	744	745.5	754
	1.767	746	745.5	760
	1.768	744.5	746.5	757.5
	1.769	746.5	741.5	758
	1.77	747	746	754.5
	1.771	747.5	746.5	758
	1.772	744	746.5	762
	1.773	743.5	747	759.5
	1.774	745.5	747	760.5
	1.775	743	746	759
	1.776	747	750	760.5
	1.777	745	745.5	759
	1.778	746	745.5	761
	1.779	743	747.5	759.5
	1.78	745.5	748.5	760.5
	1.781	746.5	746.5	759.5
	1.782	744	744.5	759
	1.783	747	745.5	761.5
	1.784	744	746.5	761
	1.785	745.5	744	759
	1.786	744.5	743.5	760.5
	1.787	747	745	759
	1.788	745.5	748	761.5
	1.789	745	743	759
	1.79	744.5	748.5	760
	1.791	745	746.5	757
	1.792	744.5	744.5	755.5
	1.793	746.5	745.5	760
	1.794	746	745.5	758.5
	1.795	743	744.5	759
	1.796	741.5	746	761
	1.797	742.5	743	759.5
	1.798	743.5	744	760
	1.799	743.5	744.5	758.5
	1.8	745.5	744.5	754.5
	1.801	743.5	745.5	754.5
	1.802	744.5	745.5	754
	1.803	747	744.5	756.5
	1.804	741	745	755.5
	1.805	740	745.5	757
	1.806	745	742.5	757
	1.807	744.5	744	754.5
	1.808	741.5	744	758
	1.809	743	742	754.5
	1.81	741	742	754.5
	1.811	743.5	742	756
	1.812	742.5	741	756
	1.813	744	740	758.5
	1.814	742.5	742.5	753
	1.815	740	739	752
	1.816	744.5	739	755.5
	1.817	745	738	750.5
	1.818	741	739.5	754.5
	1.819	738.5	738.5	749
	1.82	744	733.5	752
	1.821	742.5	740.5	753
	1.822	738.5	736	752
	1.823	743	738.5	750
	1.824	740.5	736	750.5
	1.825	742	737	748.5
	1.826	741	735	746
	1.827	740	738	746
	1.828	741	736	747.5
	1.829	738.5	736	745.5
	1.83	738.5	733.5	746.5
	1.831	738.5	733.5	749
	1.832	738.5	733.5	745
	1.833	739.5	736	747.5
	1.834	735.5	733.5	746.5
	1.835	737.5	733.5	747.5
	1.836	739	735.5	744.5
	1.837	739.5	732.5	745.5
	1.838	737.5	730	745
	1.839	737.5	733.5	745.5
	1.84	737.5	733.5	743.5
	1.841	738.5	736.5	740.5
	1.842	738.5	737	743.5
	1.843	736	736	745.5
	1.844	736.5	736	745.5
	1.845	737	735	740
	1.846	739	731.5	739.5
	1.847	735	731.5	739.5
	1.848	735.5	736.5	741.5
	1.849	737.5	733.5	740.5
	1.85	737	730	741
	1.851	737.5	731.5	743
	1.852	735.5	731.5	738.5
	1.853	733.5	733.5	739.5
	1.854	738.5	731.5	741
	1.855	735	733.5	738.5
	1.856	735	733.5	739
	1.857	737	733.5	740.5
	1.858	732	730.5	740.5
	1.859	736.5	730.5	738.5
	1.86	735.5	731.5	739
	1.861	737.5	733	739.5
	1.862	737	730.5	741
	1.863	738	730.5	742
	1.864	736	729	739
	1.865	737	729.5	740.5
	1.866	733.5	730	743
	1.867	738.5	730.5	740.5
	1.868	736	728	741
	1.869	737	728	740
	1.87	740	730	738.5
	1.871	738.5	729	739.5
	1.872	741	730.5	737.5
	1.873	740.5	727	743
	1.874	739.5	724.5	740
	1.875	737.5	724.5	738.5
	1.876	742.5	725.5	738.5
	1.877	740	725	737
	1.878	739	722	738
	1.879	737.5	724.5	737.5
	1.88	737.5	721	740
	1.881	737	723.5	738.5
	1.882	739	722.5	737.5
	1.883	740	721.5	736.5
	1.884	739	722.5	739
	1.885	738	718.5	737.5
	1.886	742	718.5	738.5
	1.887	738.5	718.5	738.5
	1.888	739.5	718	739
	1.889	740.5	714.5	735
	1.89	739	713	736
	1.891	737.5	713	739.5
	1.892	740	712.5	733.5
	1.893	739	715	735.5
	1.894	736.5	713.5	736
	1.895	740.5	715	739
	1.896	739.5	714.5	738.5
	1.897	741	713.5	735.5
	1.898	738.5	711	736
	1.899	739	705	735
	1.9	738	709.5	736
	1.901	739	709	737.5
	1.902	739	709.5	737
	1.903	737.5	704	733.5
	1.904	738.5	705.5	737
	1.905	738.5	708	735
	1.906	738	705.5	736
	1.907	739	704	733.5
	1.908	735.5	704	733
	1.909	736.5	703.5	732.5
	1.91	733	704	733.5
	1.911	733.5	701.5	730.5
	1.912	736.5	704	732
	1.913	737	703	732
	1.914	738	704.5	733
	1.915	739.5	698	733
	1.916	733.5	704	733.5
	1.917	735.5	700	733.5
	1.918	732.5	704	732
	1.919	738.5	700	733.5
	1.92	733.5	701.5	735.5
	1.921	736	699	735.5
	1.922	735.5	704	733
	1.923	735.5	704	733.5
	1.924	737	703.5	735
	1.925	733.5	704	733.5
	1.926	733.5	702	731.5
	1.927	736.5	701.5	738.5
	1.928	735.5	704	733
	1.929	735.5	703	737
	1.93	736.5	700	741
	1.931	738	703.5	733.5
	1.932	733.5	703	733.5
	1.933	737	705.5	738.5
	1.934	735.5	702	736
	1.935	733.5	706	736
	1.936	736	706	735.5
	1.937	733.5	706.5	740.5
	1.938	733.5	706.5	740.5
	1.939	731.5	707.5	738
	1.94	733.5	709	737
	1.941	731.5	708.5	743
	1.942	730.5	707.5	742
	1.943	735	709	744
	1.944	731.5	711	741
	1.945	732	709.5	741
	1.946	733.5	706.5	740
	1.947	729.5	711	741
	1.948	730	710	745
	1.949	729.5	717	743.5
	1.95	730	711.5	746
	1.951	731	710.5	745.5
	1.952	727.5	713.5	744
	1.953	729.5	713.5	743.5
	1.954	725	713	744
	1.955	726	714.5	744
	1.956	724.5	713	745.5
	1.957	727.5	717.5	745
	1.958	723.5	716	745.5
	1.959	725	717	745.5
	1.96	730	715.5	745.5
	1.961	722	716.5	745.5
	1.962	726	718.5	748
	1.963	722.5	718.5	749
	1.964	722.5	718.5	747.5
	1.965	722.5	718	745.5
	1.966	718.5	716	745.5
	1.967	718	718.5	747
	1.968	721.5	721.5	748
	1.969	721.5	718.5	751
	1.97	718.5	721.5	746.5
	1.971	718	723.5	752
	1.972	718	724.5	752
	1.973	718	725.5	747
	1.974	718.5	725	746.5
	1.975	717.5	724.5	750
	1.976	715	725	747
	1.977	718.5	725	745
	1.978	715.5	725.5	751
	1.979	718.5	730.5	750.5
	1.98	711	726.5	749.5
	1.981	714.5	731	753
	1.982	716	726	750
	1.983	718	728	749.5
	1.984	714.5	729	745
	1.985	712.5	731	750
	1.986	712.5	730.5	750
	1.987	714.5	731	750
	1.988	713.5	733.5	753
	1.989	710	733.5	748.5
	1.99	712	735.5	750.5
	1.991	715.5	733.5	748.5
	1.992	712.5	738	746.5
	1.993	708	739.5	748.5
[truncated: 6,006 more rows]

## Sheet: C
DataTypeVer2.0	Time	Fz	Fz	Fz
NumberOfData		15000	15000	15000
PreTriggerData		0	0	0
SamplingTime[ms]		1	1	1
DataLabel		AC1:CMJ	AC2:CMJ	AC3:CMJ
DataUnit	sec	N	N	N
	0	690.5	688.5	699.5
	0.001	691.5	693	701.5
	0.002	696.5	695	701.5
	0.003	690.5	690.5	702
	0.004	695.5	693.5	701
	0.005	690.5	690.5	701
	0.006	697	690	700
	0.007	699	690.5	700.5
	0.008	695.5	690.5	698.5
	0.009	699.5	692.5	699
	0.01	697.5	693	700
	0.011	697.5	690.5	697.5
	0.012	697.5	689	699
	0.013	702.5	687.5	699
	0.014	699	687	697.5
	0.015	700	687	699.5
	0.016	703.5	690.5	698
	0.017	700	688.5	698
	0.018	701.5	688.5	700.5
	0.019	700.5	686.5	697.5
	0.02	700.5	683.5	696.5
	0.021	700.5	685	700
	0.022	704	687	697.5
	0.023	703.5	684.5	696
	0.024	705.5	687.5	700
	0.025	705.5	683	696.5
	0.026	708	684	697.5
	0.027	705.5	683	697
	0.028	705.5	684	698
	0.029	708	684	696
	0.03	704.5	683.5	697
	0.031	705.5	687.5	697
	0.032	708.5	683.5	693.5
	0.033	710.5	682.5	698
	0.034	708.5	682	696
	0.035	710.5	682.5	696
	0.036	708.5	682	694.5
	0.037	707.5	681	695.5
	0.038	704.5	681	696
	0.039	705.5	684	693.5
	0.04	705.5	679	694.5
	0.041	709	680.5	697.5
	0.042	711	678.5	694.5
	0.043	709	676	695.5
	0.044	708	680.5	695
	0.045	711	676	693.5
	0.046	707.5	675.5	694.5
	0.047	709	677.5	691.5
	0.048	711	676	696
	0.049	709.5	675.5	694.5
	0.05	708.5	676	694
	0.051	707.5	674.5	693.5
	0.052	705.5	674	694
	0.053	708	675	690.5
	0.054	705.5	677.5	692
	0.055	705.5	676	694.5
	0.056	710	673	693.5
	0.057	708.5	672	693.5
	0.058	705.5	670	696.5
	0.059	710.5	672	692.5
	0.06	710	671.5	692.5
	0.061	707.5	670	693
	0.062	704.5	669	694
	0.063	704.5	674	693.5
	0.064	710.5	672	693.5
	0.065	704	669	692.5
	0.066	707	673.5	693
	0.067	705.5	670	693.5
	0.068	705.5	669	688.5
	0.069	704.5	668.5	696
	0.07	707.5	670	690.5
	0.071	704	671.5	692.5
	0.072	704	669	695.5
	0.073	705.5	669	690.5
	0.074	704	667.5	696.5
	0.075	704.5	669	694
	0.076	705	669	691.5
	0.077	703.5	664.5	690.5
	0.078	705.5	670	692.5
	0.079	707	669	692.5
	0.08	703.5	670	690.5
	0.081	704.5	668.5	691.5
	0.082	700.5	669.5	692.5
	0.083	701	669.5	692
	0.084	703	670	692.5
	0.085	703.5	666	694
	0.086	700	670.5	690
	0.087	702	670	688.5
	0.088	703.5	667	693
	0.089	702.5	668.5	691.5
	0.09	699.5	670	690.5
	0.091	703.5	673	690.5
	0.092	699.5	671	690.5
	0.093	698	673.5	694.5
	0.094	698	674.5	692
	0.095	696	672	693.5
	0.096	700.5	673	690.5
	0.097	701	676	689.5
	0.098	697.5	675	690.5
	0.099	699	674	695.5
	0.1	698	676	693.5
	0.101	698	675.5	694.5
	0.102	695.5	676	694
	0.103	698	674	692
	0.104	696.5	676	694.5
	0.105	699.5	676	694
	0.106	699	676	696
	0.107	695.5	677.5	693
	0.108	696.5	680.5	694.5
	0.109	697.5	682	695
	0.11	697.5	677.5	697.5
	0.111	697	683	695.5
	0.112	697	680	696.5
	0.113	694.5	682.5	696.5
	0.114	693	686	695
	0.115	695.5	686	696
	0.116	693.5	684	695
	0.117	693	687	697
	0.118	695.5	683.5	694.5
	0.119	695.5	689	696.5
	0.12	694	686	697
	0.121	694.5	690	698
	0.122	692	687	698.5
	0.123	694.5	689	699
	0.124	693.5	692	698
	0.125	690.5	690.5	699
	0.126	693.5	690.5	697.5
	0.127	690.5	691.5	698.5
	0.128	693	694.5	700.5
	0.129	696.5	695	698.5
	0.13	696	695.5	699
	0.131	693.5	696.5	701
	0.132	693.5	697.5	702.5
	0.133	694	700	703
	0.134	690.5	698	701
	0.135	690.5	698.5	703.5
	0.136	692	700	701
	0.137	690.5	699.5	699.5
	0.138	693.5	700.5	701.5
	0.139	690.5	700	702
	0.14	696	702	701.5
	0.141	695	702	704.5
	0.142	693.5	701.5	701.5
	0.143	690.5	703	700
	0.144	693.5	705.5	700
	0.145	693	705.5	703
	0.146	690.5	704.5	705
	0.147	692	705	701.5
	0.148	693.5	708	696
	0.149	689.5	705.5	703
	0.15	694	705.5	703
	0.151	690.5	708.5	702.5
	0.152	690	711	702.5
	0.153	692	709.5	702
	0.154	689	713.5	704.5
	0.155	695.5	712	701.5
	0.156	690.5	709.5	701.5
	0.157	695.5	712.5	702
	0.158	692.5	711.5	702
	0.159	692	714	704.5
	0.16	690.5	712.5	700
	0.161	689.5	711	701.5
	0.162	692	717	700.5
	0.163	692	713.5	704
	0.164	696.5	719	701
	0.165	690	712.5	700
	0.166	692.5	713	700.5
	0.167	689.5	712	701
	0.168	693.5	714	697.5
	0.169	693	713.5	697.5
	0.17	693.5	714.5	699
	0.171	693	717	697
	0.172	696	717	696
	0.173	690.5	713	698.5
	0.174	694	717.5	698
	0.175	691.5	720.5	696.5
	0.176	688	714.5	695.5
	0.177	695.5	716	696.5
	0.178	691.5	719	694
	0.179	694	715	691.5
	0.18	692.5	718	694
	0.181	694.5	714.5	690.5
	0.182	698	716	692.5
	0.183	695.5	714.5	690.5
	0.184	690.5	713	694
	0.185	690.5	717	690.5
	0.186	694.5	715.5	693
	0.187	692.5	716.5	690.5
	0.188	694	718.5	690.5
	0.189	695.5	715.5	689.5
	0.19	698.5	714.5	688
	0.191	698	714	687
	0.192	695.5	716	688
	0.193	693	718	688.5
	0.194	697.5	718	684.5
	0.195	696	716.5	689
	0.196	694	714	685
	0.197	692.5	715	685
	0.198	695.5	717	684
	0.199	696.5	718	684.5
	0.2	697	715	683
	0.201	694	713.5	686
	0.202	695.5	713	684
	0.203	697	712.5	681.5
	0.204	696.5	709.5	684.5
	0.205	695	715	682
	0.206	694.5	716	684
	0.207	699.5	715	682.5
	0.208	696.5	712.5	683
	0.209	696.5	712.5	681.5
	0.21	696	714	682
	0.211	690.5	710	686.5
	0.212	697.5	713	682
	0.213	697.5	711	680
	0.214	695.5	711.5	684.5
	0.215	699	712	681.5
	0.216	697	705.5	684.5
	0.217	697.5	711.5	682
	0.218	695.5	709.5	682.5
	0.219	697.5	711	680
	0.22	696.5	711.5	680
	0.221	695.5	705.5	681.5
	0.222	697.5	710	680.5
	0.223	696	708.5	682.5
	0.224	697.5	709	684
	0.225	696	709.5	681.5
	0.226	695.5	708.5	682
	0.227	695.5	709	683.5
	0.228	701.5	704.5	682
	0.229	698.5	711.5	683.5
	0.23	698.5	709.5	684.5
	0.231	699.5	708.5	685
	0.232	697.5	708.5	686.5
	0.233	696	705	688
	0.234	699.5	705.5	687.5
	0.235	698	705.5	686
	0.236	700	705.5	689
	0.237	697.5	704	689.5
	0.238	697.5	705	690
	0.239	696.5	703.5	687
	0.24	697	702	687
	0.241	696	704.5	689.5
	0.242	698	702	686.5
	0.243	696.5	703	689
	0.244	697	701	687.5
	0.245	700.5	704.5	688.5
	0.246	697	702	690.5
	0.247	697.5	700	690
	0.248	697.5	701	696.5
	0.249	696	703	690.5
	0.25	698	697	692.5
	0.251	697.5	699	690.5
	0.252	697.5	697.5	691.5
	0.253	696.5	698	690.5
	0.254	700	696.5	696.5
	0.255	696	699	690.5
	0.256	702.5	696	693.5
	0.257	697	698	694
	0.258	697.5	694	692.5
	0.259	697.5	696.5	694
	0.26	698.5	694.5	690.5
	0.261	700	694	693.5
	0.262	696.5	696	695.5
	0.263	697	695	693
	0.264	700	696	695.5
	0.265	696	690	697.5
	0.266	696	693	696
	0.267	699.5	690	697
	0.268	697.5	692	700.5
	0.269	700	693.5	698
	0.27	697.5	690.5	697
	0.271	700.5	692	696.5
	0.272	698	690.5	697.5
	0.273	698.5	689.5	696.5
	0.274	699.5	685.5	695.5
	0.275	701.5	689	698
	0.276	699	686.5	696.5
	0.277	700.5	690	701
	0.278	698.5	689.5	698
	0.279	699.5	686	696
	0.28	697	685.5	698
	0.281	697.5	687	700
	0.282	698.5	688	701
	0.283	695.5	684	696
	0.284	694	686	698
	0.285	695	688	700.5
	0.286	698.5	685	701.5
	0.287	698.5	687.5	700
	0.288	694	683.5	699.5
	0.289	699	687	697.5
	0.29	697.5	685.5	698
	0.291	695.5	683	700.5
	0.292	694	681.5	697.5
	0.293	692.5	686.5	699.5
	0.294	696	685.5	699.5
	0.295	692.5	682.5	699.5
	0.296	695.5	683.5	700
	0.297	693.5	687	698.5
	0.298	693.5	684	699
	0.299	694.5	685.5	703.5
	0.3	692.5	682	698.5
	0.301	693	683	700.5
	0.302	695	682.5	697.5
	0.303	695	683	699
	0.304	693.5	680.5	698
	0.305	693	681.5	700
	0.306	690.5	682.5	700.5
	0.307	690.5	682.5	699.5
	0.308	693	686	701.5
	0.309	693	685	702.5
	0.31	688	685	698
	0.311	693	687	700
	0.312	690.5	689	700.5
	0.313	688.5	683.5	699.5
	0.314	692.5	685.5	699
	0.315	689.5	685.5	699.5
	0.316	689.5	685	700
	0.317	687.5	682.5	702.5
	0.318	687	685.5	699
	0.319	690	689	697.5
	0.32	688.5	690	699
	0.321	690.5	690	699.5
	0.322	690.5	688.5	699.5
	0.323	690	686.5	701
	0.324	689	686.5	697.5
	0.325	692.5	688.5	696.5
	0.326	690.5	688.5	697.5
	0.327	686	689.5	698
	0.328	689.5	688	698.5
	0.329	689	691.5	700.5
	0.33	687	690.5	695.5
	0.331	685.5	689.5	697.5
	0.332	690	687	696
	0.333	690	689	697.5
	0.334	687	690.5	695
	0.335	689	690.5	697
	0.336	688	688	693
	0.337	684.5	690	695
	0.338	690.5	694	696.5
	0.339	690	692.5	693.5
	0.34	691	690.5	692
	0.341	686	690.5	696
	0.342	688	690.5	697
	0.343	689.5	689	694.5
	0.344	689	692	694.5
	0.345	688	696	692
	0.346	686.5	690.5	694.5
	0.347	687	692.5	694
	0.348	687.5	690.5	692
	0.349	688.5	693.5	695
	0.35	688	695.5	692.5
	0.351	687	690.5	690.5
	0.352	690.5	694	690
	0.353	688	695	693.5
	0.354	686.5	692.5	690.5
	0.355	686.5	695	690
	0.356	686.5	695	692.5
	0.357	686	696	686
	0.358	687	693	690
	0.359	685.5	692.5	690.5
	0.36	685.5	695	690.5
	0.361	689.5	694.5	687.5
	0.362	690.5	690.5	688.5
	0.363	685	697.5	690.5
	0.364	688	698	689
	0.365	687	694.5	690
	0.366	688.5	692	690.5
	0.367	690	696	690.5
	0.368	688	699	688.5
	0.369	690	695	690
	0.37	686	697.5	690
	0.371	683.5	697	689
	0.372	687	696.5	690
	0.373	687.5	699	690.5
	0.374	690.5	698	690.5
	0.375	690.5	695	688.5
	0.376	689	697.5	686
	0.377	688	701	689
	0.378	686	699	689
	0.379	689	700.5	685
	0.38	687.5	699	692
	0.381	688.5	697.5	687
	0.382	687.5	697.5	690
	0.383	687	703.5	687
	0.384	683.5	699.5	693
	0.385	687	696	687
	0.386	685.5	700	690.5
	0.387	690.5	700	690
	0.388	686	699	688.5
	0.389	692	701.5	690.5
	0.39	687.5	697.5	690
	0.391	689	698	686.5
	0.392	688	698.5	690.5
	0.393	688	700	693.5
	0.394	688	702.5	690.5
	0.395	688	699.5	694.5
	0.396	688	700.5	695
	0.397	690.5	699.5	694
	0.398	689	703	690.5
	0.399	686	701	692.5
	0.4	693	696.5	694.5
	0.401	690.5	700.5	692.5
	0.402	687.5	701.5	693.5
	0.403	688.5	700.5	692
	0.404	684	699.5	696
	0.405	689	702	692.5
	0.406	686	702	695
	0.407	686	701	695.5
	0.408	692	701.5	693
	0.409	692	702	697.5
	0.41	689.5	700	695.5
	0.411	686	702	694.5
	0.412	688	699.5	695.5
	0.413	688.5	700.5	696.5
	0.414	689.5	699.5	697
	0.415	689.5	701	695.5
	0.416	690	699.5	698
	0.417	688	700	696.5
	0.418	685.5	700	698
	0.419	690.5	699.5	697.5
	0.42	691.5	701.5	697.5
	0.421	688.5	703.5	697
	0.422	688.5	700.5	695
	0.423	690.5	702	698
	0.424	690.5	703.5	698.5
	0.425	689	699.5	700.5
	0.426	687	702.5	697.5
	0.427	689	699.5	703
	0.428	689.5	700	699
	0.429	687	699.5	699
	0.43	688	702	697
	0.431	685.5	701.5	697.5
	0.432	686	704	699
	0.433	686.5	700.5	700
	0.434	690	699.5	694.5
	0.435	689	703	695.5
	0.436	688	700	695
	0.437	687	698.5	697
	0.438	684.5	700.5	697.5
	0.439	687.5	700.5	699
	0.44	688	696.5	698
	0.441	686	701	697.5
	0.442	688	699.5	695
	0.443	684	700	694.5
	0.444	684	697.5	698
	0.445	686	698	696.5
	0.446	681	700	697.5
	0.447	685.5	697.5	695
	0.448	687.5	698	696
	0.449	682.5	702.5	693.5
	0.45	684	699.5	694.5
	0.451	684.5	698.5	697
	0.452	682.5	698.5	696
	0.453	682.5	699	693
	0.454	684	702.5	696.5
	0.455	685	698	697.5
	0.456	681.5	698	694.5
	0.457	678	699	699.5
	0.458	681.5	701	695
	0.459	683	699.5	693
	0.46	685	699.5	690.5
	0.461	682.5	700.5	692.5
	0.462	683	701.5	694
	0.463	681.5	697.5	694.5
	0.464	682.5	697	696.5
	0.465	682.5	696.5	694
	0.466	680.5	699	695
	0.467	682	699.5	697
	0.468	683	698	693.5
	0.469	680.5	696	694
	0.47	681.5	700.5	696
	0.471	679	699	696
	0.472	681.5	699.5	693.5
	0.473	683	697	692
	0.474	683.5	698	695
	0.475	680.5	702	694.5
	0.476	683.5	697.5	693
	0.477	683	698	694
	0.478	683	695.5	693
	0.479	681.5	696	693.5
	0.48	684	698	693
	0.481	683.5	697.5	690.5
	0.482	683	701.5	693.5
	0.483	684	701	692
	0.484	684	701.5	690.5
	0.485	683.5	699.5	694.5
	0.486	684	698	692
	0.487	687	697	695
	0.488	685.5	697	694
	0.489	683.5	697.5	694.5
	0.49	683	702.5	694.5
	0.491	684	697	694.5
	0.492	688	697.5	695
	0.493	685	699.5	690.5
	0.494	687	701	691.5
	0.495	690.5	702.5	693
	0.496	683	697.5	693
	0.497	686.5	696.5	694
	0.498	689	694.5	693
	0.499	686	698	690.5
	0.5	685.5	698	693.5
	0.501	686.5	698	697
	0.502	692.5	693.5	692
	0.503	686	697.5	693
	0.504	690.5	697.5	696
	0.505	690.5	697	694
	0.506	690.5	697.5	697
	0.507	688	697	693
	0.508	689.5	694	693.5
	0.509	692	694.5	697
	0.51	691.5	695	697
	0.511	693.5	693.5	695.5
	0.512	692	693.5	690.5
	0.513	692	693.5	693.5
	0.514	693.5	696.5	693.5
	0.515	694	695.5	694.5
	0.516	695.5	694	695.5
	0.517	700	695.5	694.5
	0.518	699	691.5	690.5
	0.519	697	693.5	696.5
	0.52	698.5	694.5	694
	0.521	699	695.5	695
	0.522	699	695.5	698.5
	0.523	702	695.5	692
	0.524	701.5	692.5	699
	0.525	699.5	695	698.5
	0.526	699.5	693.5	699
	0.527	702.5	695	697.5
	0.528	700	690	693.5
	0.529	703	693	698.5
	0.53	704	695.5	698
	0.531	704.5	693.5	698.5
	0.532	703	690.5	697.5
	0.533	704.5	692	696
	0.534	704.5	694.5	698.5
	0.535	704.5	690	699.5
	0.536	705.5	696	696.5
	0.537	705	693	697
	0.538	704.5	690.5	700
	0.539	705	691.5	701.5
	0.54	708.5	693.5	697.5
	0.541	705.5	693	701
	0.542	705.5	693	701
	0.543	710	689	699.5
	0.544	708.5	693.5	697
	0.545	714.5	690	701.5
	0.546	712	690.5	700.5
	0.547	712.5	690.5	699
	0.548	709.5	693.5	699
	0.549	709	691.5	698
	0.55	714	695.5	701
	0.551	712	690	702
	0.552	714	692.5	700.5
	0.553	711.5	693	699.5
	0.554	710	692	701
	0.555	712.5	696	704
	0.556	711	694.5	701.5
	0.557	713	694	697.5
	0.558	717	692	700.5
	0.559	713	690.5	697.5
	0.56	711	692.5	698
	0.561	713.5	694.5	700.5
	0.562	711	692.5	698
	0.563	716	691.5	699.5
	0.564	714.5	697.5	699
	0.565	714	694	702
	0.566	715.5	692.5	696
	0.567	716.5	693.5	700
	0.568	713	690.5	699.5
	0.569	711	689	696
	0.57	713.5	694.5	696.5
	0.571	711	693.5	697
	0.572	710	692	697.5
	0.573	718	693.5	699.5
	0.574	715	695.5	696.5
	0.575	712.5	692.5	695
	0.576	711	696.5	693.5
	0.577	715	692.5	698
	0.578	708.5	694.5	693.5
	0.579	712.5	694	696
	0.58	714	695	696.5
	0.581	713.5	699	695
	0.582	711	694.5	697
	0.583	711	695.5	697.5
	0.584	711.5	694.5	694
	0.585	709.5	692.5	690.5
	0.586	711.5	690.5	696.5
	0.587	710.5	695	694.5
	0.588	708.5	696.5	694
	0.589	708	694.5	694.5
	0.59	710	694	694
	0.591	711.5	694	693.5
	0.592	709.5	692.5	694.5
	0.593	707.5	690.5	696
	0.594	709.5	695.5	697.5
	0.595	708	693.5	697.5
	0.596	710	692.5	690.5
	0.597	705.5	692.5	690.5
	0.598	710.5	694.5	693.5
	0.599	709.5	692.5	692.5
	0.6	705.5	693.5	695.5
	0.601	705.5	692.5	690
	0.602	709.5	695.5	690.5
	0.603	705.5	693.5	690.5
	0.604	704.5	694	693.5
	0.605	705.5	695.5	692
	0.606	703.5	694.5	690.5
	0.607	705.5	690.5	689.5
	0.608	704.5	692	689
	0.609	703.5	691.5	694.5
	0.61	705.5	690.5	690.5
	0.611	703	693	690.5
	0.612	702.5	697	692
	0.613	702	693.5	690.5
	0.614	705	693.5	689
	0.615	703.5	691.5	692
	0.616	704.5	693	690.5
	0.617	701.5	693.5	690.5
	0.618	705.5	690.5	692
	0.619	704	692	689
	0.62	700.5	691.5	690.5
	0.621	701	695	688.5
	0.622	701.5	695.5	690.5
	0.623	699.5	694.5	690.5
	0.624	702	688	690.5
	0.625	702	695.5	690
	0.626	701	698	692.5
	0.627	698	693	687.5
	0.628	700	690.5	690.5
	0.629	699.5	696.5	689
	0.63	699	698	687
	0.631	702	694	690.5
	0.632	702	696	690.5
	0.633	697.5	694	690.5
	0.634	700.5	693.5	689.5
	0.635	700	696.5	690.5
	0.636	697.5	696	692.5
	0.637	698	698	686
	0.638	698.5	699	690
	0.639	698	696	688
	0.64	699.5	698	689.5
	0.641	697.5	696.5	690.5
	0.642	701.5	699.5	690
	0.643	700	697.5	688.5
	0.644	697	695	687.5
	0.645	699	697.5	692
	0.646	700	699.5	689.5
	0.647	698.5	699	686
	0.648	699.5	699	690.5
	0.649	701	699	688
	0.65	694	699.5	688
	0.651	698	701	690.5
	0.652	699.5	700.5	690
	0.653	698	700	690
	0.654	701	702	689
	0.655	696.5	704.5	689.5
	0.656	699	704	689.5
	0.657	697	702	690.5
	0.658	699	700	690.5
	0.659	699.5	703	692.5
	0.66	700	703.5	690.5
	0.661	697.5	703	690.5
	0.662	698	702.5	692.5
	0.663	700	705.5	690.5
	0.664	698.5	705.5	690.5
	0.665	697	705.5	694
	0.666	697	701.5	690.5
	0.667	699.5	705	690
	0.668	697.5	703.5	693.5
	0.669	697.5	704.5	696.5
	0.67	697	704.5	694
	0.671	698	705.5	692
	0.672	697.5	708	694.5
	0.673	694.5	704.5	690.5
	0.674	697	704.5	690.5
	0.675	696	705	693.5
	0.676	696	705.5	693.5
	0.677	696.5	705.5	693.5
	0.678	697	703	693.5
	0.679	695.5	708	694
	0.68	696.5	705	692.5
	0.681	698.5	704.5	696
	0.682	697.5	704	695.5
	0.683	695.5	702	692.5
	0.684	694.5	703.5	696.5
	0.685	697.5	702.5	692.5
	0.686	696.5	704.5	696.5
	0.687	696	701	694.5
	0.688	695.5	704.5	696.5
	0.689	694.5	704.5	694.5
	0.69	694	703	691.5
	0.691	693.5	699	697
	0.692	695	703	699
	0.693	694	704.5	690.5
	0.694	696.5	702	694
	0.695	697	705	696
	0.696	696.5	703	697
	0.697	695	704.5	689
	0.698	697	700	696
	0.699	692.5	700	694
	0.7	694	704	692.5
	0.701	694.5	700.5	693.5
	0.702	699	700	695.5
	0.703	694	699.5	696.5
	0.704	693.5	700	694
	0.705	694.5	699	692.5
	0.706	690.5	702.5	696
	0.707	691.5	698	694.5
	0.708	695.5	698.5	695.5
	0.709	690.5	700	694.5
	0.71	695.5	701	693.5
	0.711	690.5	697	693.5
	0.712	695	698	694.5
	0.713	692.5	697	693
	0.714	694.5	698	690.5
	0.715	689.5	696.5	692
	0.716	690	697	690.5
	0.717	695.5	697	694
	0.718	695.5	701.5	694
	0.719	693	697.5	692.5
	0.72	693	699	693.5
	0.721	694	699	694
	0.722	696.5	698.5	693.5
	0.723	692	698.5	690.5
	0.724	693.5	698.5	692.5
	0.725	694	698	693
	0.726	690.5	699	690.5
	0.727	692.5	697.5	690.5
	0.728	693.5	697.5	690.5
	0.729	690.5	697.5	690.5
	0.73	692	700	690
	0.731	690.5	697	688
	0.732	691	697.5	692.5
	0.733	693	701	690.5
	0.734	692.5	697.5	692.5
	0.735	693	696	690
	0.736	693	697	690
	0.737	692.5	696	689
	0.738	690.5	699	691.5
	0.739	690.5	700.5	689.5
	0.74	692.5	702	689.5
	0.741	690.5	697.5	694
	0.742	689	697	689
	0.743	690	703.5	689.5
	0.744	688.5	696.5	690.5
	0.745	691.5	698.5	689
	0.746	690	695.5	693.5
	0.747	690	701	689
	0.748	690	698.5	689
	0.749	689.5	697.5	690.5
	0.75	690.5	701.5	689.5
	0.751	692.5	698	687
	0.752	691.5	698	690.5
	0.753	690.5	700.5	690
	0.754	690.5	698	690.5
	0.755	689	698	688.5
	0.756	687.5	697.5	689.5
	0.757	691.5	700.5	690
	0.758	693.5	701.5	687.5
	0.759	690.5	699.5	690.5
	0.76	689.5	701.5	687
	0.761	690	699	690.5
	0.762	691.5	700.5	690.5
	0.763	692	699.5	692.5
	0.764	691.5	700.5	691.5
	0.765	689	698	690.5
	0.766	694	703	689
	0.767	693	700	689
	0.768	695	699.5	694.5
	0.769	690.5	702.5	690.5
	0.77	690.5	699.5	688
	0.771	690.5	701	690.5
	0.772	689.5	703	690
	0.773	690.5	703	690.5
	0.774	693.5	704	690.5
	0.775	693.5	700	690
	0.776	690	701	690.5
	0.777	690.5	698.5	690.5
	0.778	692.5	703	689.5
	0.779	694.5	701.5	689.5
	0.78	690.5	700.5	690
	0.781	696	702.5	690.5
	0.782	695.5	702.5	690.5
	0.783	696	699	692
	0.784	692.5	701	692
	0.785	694.5	699	691.5
	0.786	692.5	700	688.5
	0.787	696	698	689.5
	0.788	692	699.5	690
	0.789	696.5	700	690.5
	0.79	697.5	700.5	692
	0.791	696.5	700	687
	0.792	693.5	699.5	690.5
	0.793	697.5	698	690.5
	0.794	695.5	698.5	693
	0.795	696.5	700	686.5
	0.796	697.5	699	690.5
	0.797	692.5	698	692
	0.798	695.5	697.5	690.5
	0.799	697.5	699	690.5
	0.8	700	697.5	686
	0.801	697.5	698	687.5
	0.802	695	698.5	688
	0.803	698	701.5	685.5
	0.804	695.5	698	688
	0.805	699	697.5	688
	0.806	696	697.5	685
	0.807	699.5	696	685.5
	0.808	698	695.5	685
	0.809	699.5	696.5	688
	0.81	697.5	699.5	685.5
	0.811	702	698	685.5
	0.812	701	694	683
	0.813	697.5	696	686.5
	0.814	698	697	683
	0.815	697.5	697.5	681.5
	0.816	698	696	683.5
	0.817	704.5	697.5	684.5
	0.818	699	695	684
	0.819	699	696	681
	0.82	699.5	694.5	681
	0.821	697.5	694.5	680.5
	0.822	699	697.5	682.5
	0.823	700	695	681
	0.824	699.5	692.5	681.5
	0.825	701.5	696	680.5
	0.826	699	696.5	679
	0.827	703	694.5	681
	0.828	701	695.5	681.5
	0.829	702.5	694.5	676
	0.83	697.5	695.5	681.5
	0.831	701.5	695.5	679.5
	0.832	702.5	694.5	683.5
	0.833	697.5	692	676
	0.834	695.5	690.5	680
	0.835	699	691.5	679
	0.836	697.5	696	678.5
	0.837	700	692	678
	0.838	697.5	695.5	679
	0.839	702	693	679
	0.84	703.5	692.5	682.5
	0.841	698	695.5	682
	0.842	699	690	680.5
	0.843	701	690.5	681
	0.844	701	694	681.5
	0.845	702	690.5	679
	0.846	699.5	690.5	682.5
	0.847	700.5	690.5	682
	0.848	699	692	686
	0.849	699.5	690	681.5
	0.85	699.5	690.5	681
	0.851	698.5	689	682.5
	0.852	702	694.5	683.5
	0.853	704	690.5	684
	0.854	700.5	693	683
	0.855	700.5	690.5	681.5
	0.856	699.5	690.5	682
	0.857	700	693	682.5
	0.858	699.5	690.5	681.5
	0.859	705.5	690.5	688
	0.86	700	695.5	685
	0.861	701	692.5	682.5
	0.862	701.5	690.5	687.5
	0.863	699	692.5	690
	0.864	700.5	692	689.5
	0.865	704	689	688.5
	0.866	697.5	692.5	690.5
	0.867	702.5	690	691.5
	0.868	699	690.5	690
	0.869	701.5	691.5	690.5
	0.87	697.5	690.5	689.5
	0.871	700	692	692.5
	0.872	697	691.5	692.5
	0.873	696.5	690.5	693
	0.874	697.5	693.5	695
	0.875	698	690.5	693.5
	0.876	698	693	694
	0.877	700.5	692.5	695.5
	0.878	699	694	695
	0.879	700	695.5	696.5
	0.88	704	694.5	701
	0.881	698	691.5	697.5
	0.882	697	699.5	694.5
	0.883	696.5	694	699.5
	0.884	699.5	692.5	698
	0.885	698.5	696	702
	0.886	697.5	693.5	701
	0.887	697	696	699
	0.888	701.5	697	699
	0.889	700.5	696.5	701.5
	0.89	694.5	696.5	702.5
	0.891	696	695.5	699
	0.892	695.5	696.5	703.5
	0.893	696.5	699	704.5
	0.894	697	695.5	704.5
	0.895	693.5	695.5	705.5
	0.896	697	697.5	705.5
	0.897	697	695.5	705.5
	0.898	695.5	694	704
	0.899	695.5	696	705.5
	0.9	690.5	696	703.5
	0.901	695.5	695.5	704.5
	0.902	694	695.5	705.5
	0.903	697	697.5	708
	0.904	695.5	698	703.5
	0.905	692.5	695	705.5
	0.906	692.5	697	708
	0.907	696.5	697	707.5
	0.908	693.5	694.5	711
	0.909	690.5	696.5	707
	0.91	690.5	697.5	705.5
	0.911	695	697	708.5
	0.912	693	692.5	710.5
	0.913	696	694.5	711.5
	0.914	690.5	695.5	705.5
	0.915	692	693.5	707
	0.916	690.5	693.5	711
	0.917	692	689.5	705.5
	0.918	692.5	696.5	705.5
	0.919	690	695.5	709.5
	0.92	692	693	710
	0.921	690.5	693.5	705.5
	0.922	691.5	693.5	709
	0.923	690.5	696	710
	0.924	690.5	691	709
	0.925	690.5	689.5	704.5
	0.926	689.5	693	709
	0.927	690.5	692.5	709
	0.928	690.5	690.5	705.5
	0.929	689.5	694.5	708
	0.93	689.5	690	704.5
	0.931	692	689.5	705.5
	0.932	689	692	705.5
	0.933	694	691.5	709.5
	0.934	689	692.5	705.5
	0.935	689	690.5	709
	0.936	688	690.5	705.5
	0.937	690	693.5	704.5
	0.938	689	694	704.5
	0.939	690.5	692.5	705.5
	0.94	690	690.5	705.5
	0.941	691.5	690.5	705
	0.942	687	688	701.5
	0.943	690	692	701.5
	0.944	695	690.5	700.5
	0.945	690.5	690.5	705.5
	0.946	689	691.5	703
	0.947	695	690.5	699
	0.948	691.5	691.5	703.5
	0.949	693.5	688	699.5
	0.95	692	686.5	703.5
	0.951	694	690.5	704
	0.952	692	690	701
	0.953	690.5	688.5	702
	0.954	692.5	690.5	704
	0.955	696.5	689.5	701
	0.956	693	687	699
	0.957	690.5	690.5	700
	0.958	696	688	701.5
	0.959	694.5	692.5	700.5
	0.96	696	689.5	698.5
	0.961	696	690.5	696.5
	0.962	696.5	692.5	703.5
	0.963	694	690.5	697.5
	0.964	696	689.5	701
	0.965	699.5	690.5	702
	0.966	696.5	689	700
	0.967	694.5	693	697.5
	0.968	696.5	687	699.5
	0.969	696.5	690.5	700.5
	0.97	699	688.5	698
	0.971	698	690.5	701
	0.972	698	693.5	702
	0.973	700	690.5	699
	0.974	696.5	689.5	701
	0.975	699.5	692	697.5
	0.976	702	690.5	701
	0.977	698.5	693	698
	0.978	704	694.5	699
	0.979	697.5	693.5	695.5
	0.98	701	692	698
	0.981	700.5	692	698.5
	0.982	699.5	692.5	698.5
	0.983	705.5	690.5	697.5
	0.984	700.5	695	697
	0.985	703	694	698
	0.986	700	691	700.5
	0.987	702	692.5	697
	0.988	701.5	692	700
	0.989	699.5	693	697
	0.99	703	695.5	697.5
	0.991	703	694	699
	0.992	704.5	694	696
	0.993	704.5	695.5	696.5
	0.994	700.5	694	695.5
	0.995	703	693	697.5
	0.996	702.5	691	698
	0.997	699.5	695.5	695
	0.998	703	690.5	695.5
	0.999	704	693	697.5
	1	702	692	698
	1.001	704.5	690.5	694.5
	1.002	702	689.5	692.5
	1.003	705.5	693.5	697
	1.004	705.5	692	698
	1.005	705.5	692	690.5
	1.006	704	690.5	690.5
	1.007	704.5	690.5	693.5
	1.008	701	689.5	695
	1.009	702	689	693.5
	1.01	705.5	690	690.5
	1.011	705.5	693	693.5
	1.012	705.5	687.5	690
	1.013	703.5	690.5	693
	1.014	704.5	684	692.5
	1.015	700.5	687.5	690.5
	1.016	702.5	690	690.5
	1.017	702	684.5	690.5
	1.018	703	687	693.5
	1.019	705.5	686.5	690
	1.02	705.5	688.5	693
	1.021	705	687.5	689
	1.022	703	685.5	689
	1.023	705.5	684.5	690.5
	1.024	704.5	690.5	684
	1.025	704.5	686	690
	1.026	708.5	683.5	692
	1.027	704.5	685.5	690.5
	1.028	701.5	686	689
	1.029	701.5	684.5	689
	1.03	704	685.5	688.5
	1.031	704.5	685.5	689
	1.032	704.5	690.5	689
	1.033	703.5	684	686.5
	1.034	705.5	688	689
	1.035	703	684	688.5
	1.036	704.5	687.5	688.5
	1.037	703	683.5	685
	1.038	705.5	689	686
	1.039	705.5	684	689.5
	1.04	704.5	685	687.5
	1.041	705.5	683	684
	1.042	705	684.5	684.5
	1.043	704.5	684.5	682.5
	1.044	705.5	686	688
	1.045	703.5	684	683
	1.046	704.5	683.5	684.5
	1.047	700.5	686	685
	1.048	701	684	681
	1.049	703	688	682.5
	1.05	699.5	683	683.5
	1.051	705	688	683.5
	1.052	704.5	684	684.5
	1.053	703.5	685	683
	1.054	704.5	684	681
	1.055	699	684	682
	1.056	703.5	686	683
	1.057	704.5	688.5	683
	1.058	701.5	684.5	682.5
	1.059	703.5	686	683
	1.06	696.5	687	681.5
	1.061	701	689.5	683.5
	1.062	698	686	681.5
	1.063	701	687	678.5
	1.064	698	689.5	682
	1.065	697.5	688.5	684
	1.066	697.5	685.5	683
	1.067	698	688	682.5
	1.068	698	685	680.5
	1.069	697.5	687.5	682
	1.07	697	684.5	682
	1.071	697.5	685	680.5
	1.072	696.5	686.5	681
	1.073	699	684.5	680
	1.074	695.5	685.5	683.5
	1.075	694.5	685.5	684
	1.076	692.5	684.5	683.5
	1.077	698	688	683
	1.078	695.5	684.5	681.5
	1.079	693.5	684.5	685.5
	1.08	692.5	686.5	679
	1.081	695	685.5	683
	1.082	690.5	687	684
	1.083	690.5	686	683
	1.084	692	684.5	683.5
	1.085	690	684.5	683
	1.086	690.5	685.5	688
	1.087	690.5	685.5	683
	1.088	690.5	683.5	684
	1.089	691	684	685.5
	1.09	690.5	686	684
	1.091	690.5	685.5	684.5
	1.092	690	686.5	684
	1.093	690	684.5	685
	1.094	686.5	680	686
	1.095	690.5	681	687
	1.096	690.5	685	687.5
	1.097	688	684.5	685.5
	1.098	690.5	684	688
	1.099	690.5	682.5	687.5
	1.1	687	682.5	690
	1.101	689	683	688.5
	1.102	688	680	690
	1.103	690	684	690.5
	1.104	690	681	689.5
	1.105	685	682.5	690.5
	1.106	688.5	682	689.5
	1.107	688	679.5	692
	1.108	690.5	680.5	692
	1.109	685.5	682	692
	1.11	687	682	692
	1.111	688.5	681	693
	1.112	688	681	694.5
	1.113	690.5	682.5	696
	1.114	690.5	675.5	697
	1.115	688.5	678.5	697
	1.116	690.5	676	700.5
	1.117	690.5	679.5	697
	1.118	689.5	675.5	698
	1.119	688	677.5	697.5
	1.12	687.5	680	696.5
	1.121	687.5	674	700
	1.122	689	673.5	699
	1.123	690.5	678	700
	1.124	688.5	678.5	700.5
	1.125	690.5	676	700
	1.126	691.5	676	700
	1.127	692.5	674	700
	1.128	690	674.5	698
	1.129	691.5	676	704.5
	1.13	692	674.5	704.5
	1.131	692	675	704.5
	1.132	692	669.5	703.5
	1.133	694.5	674	703
	1.134	690.5	674.5	703.5
	1.135	692.5	675	704.5
	1.136	695.5	676	703
	1.137	690.5	673	702.5
	1.138	690.5	671.5	703
	1.139	692	674.5	705
	1.14	690.5	675	705.5
	1.141	693.5	676	704
	1.142	694	676	702
	1.143	694.5	676	703.5
	1.144	690.5	675.5	705.5
	1.145	699.5	676	705.5
	1.146	693.5	676	704.5
	1.147	698	677	703
	1.148	694	675	707.5
	1.149	693	676	705.5
	1.15	693	676	704.5
	1.151	690.5	676	704.5
	1.152	695.5	676	709.5
	1.153	693	676	705
	1.154	694.5	679	704.5
	1.155	690.5	677.5	705.5
	1.156	695.5	679.5	702.5
	1.157	695.5	678.5	705.5
	1.158	697	676	704
	1.159	695	677.5	700
	1.16	695	681.5	702
	1.161	694.5	680.5	702.5
	1.162	695.5	682	705
	1.163	693.5	679.5	700.5
	1.164	696	684	702.5
	1.165	694.5	683.5	705.5
	1.166	693	684	705.5
	1.167	695.5	683.5	704
	1.168	694.5	684	704
	1.169	696.5	685	703
	1.17	695.5	686	704
	1.171	697	687	704.5
	1.172	696.5	686	701.5
	1.173	695.5	686	701
	1.174	693	689	704.5
	1.175	693	690	704
	1.176	697.5	690.5	700.5
	1.177	696.5	692.5	704
	1.178	695.5	694.5	699.5
	1.179	696	690	704
	1.18	697	693	703
	1.181	695	691.5	701
	1.182	696	696.5	697.5
	1.183	696.5	697.5	700
	1.184	696	698	703.5
	1.185	699.5	700	702.5
	1.186	696.5	697.5	697
	1.187	696.5	698.5	700.5
	1.188	697.5	698	701
	1.189	700	700	700
	1.19	697	699.5	695
	1.191	698	705	698.5
	1.192	697.5	702	700.5
	1.193	696	703.5	698
	1.194	693.5	705.5	697.5
	1.195	696	704	695.5
	1.196	698.5	708	697.5
	1.197	697.5	705.5	697
	1.198	695.5	709.5	694
	1.199	696.5	710.5	693
	1.2	699.5	705.5	695
	1.201	696	711	694
	1.202	700	712.5	697.5
	1.203	697.5	705.5	697
	1.204	697.5	713.5	695
	1.205	700	713	693
	1.206	700.5	715	696
	1.207	700	716.5	696.5
	1.208	700.5	716.5	693
	1.209	699.5	713.5	695
	1.21	698.5	717	696
	1.211	698	715.5	695
	1.212	696.5	718.5	697
	1.213	699.5	714.5	692.5
	1.214	703	719.5	692.5
	1.215	698.5	716.5	692.5
	1.216	700	718	697
	1.217	700	718	693.5
	1.218	700	722	692.5
	1.219	701.5	720.5	695.5
	1.22	700	718.5	693
	1.221	699.5	719	695.5
	1.222	701	720	689.5
	1.223	698.5	718	693
	1.224	698	720.5	694.5
	1.225	700.5	722.5	690.5
	1.226	700.5	720.5	693.5
	1.227	698	720.5	695
	1.228	698	720.5	692
	1.229	698	718	690.5
	1.23	698	720.5	690.5
	1.231	701	720.5	695
	1.232	702	726	693
	1.233	701	724	694
	1.234	701.5	723.5	695.5
	1.235	703.5	724	690.5
	1.236	698	720.5	690.5
	1.237	699.5	720	692.5
	1.238	700.5	723.5	693
	1.239	701	725	693
	1.24	700.5	723.5	694.5
	1.241	698	726	690.5
	1.242	700	727	693
	1.243	697.5	725.5	694
	1.244	697.5	725	693
	1.245	698	724.5	690.5
	1.246	698.5	727	690.5
	1.247	697	725	690.5
	1.248	699.5	725	693.5
	1.249	700	724.5	690.5
	1.25	698.5	722.5	693.5
	1.251	697.5	723.5	692.5
	1.252	698	724.5	692.5
	1.253	695.5	722	690.5
	1.254	701	725	692.5
	1.255	695.5	722.5	694
	1.256	695	724	692
	1.257	696	725	690.5
	1.258	697	724.5	692
	1.259	698	720.5	692.5
	1.26	694	722.5	689.5
	1.261	698.5	720.5	696.5
	1.262	698.5	720	692
	1.263	696	718.5	690.5
	1.264	695	718.5	692.5
	1.265	697.5	718	692
	1.266	697.5	718.5	694
	1.267	692.5	715.5	697.5
	1.268	693.5	717.5	690.5
	1.269	695.5	716.5	695
	1.27	695.5	716.5	694.5
	1.271	694.5	715.5	695
	1.272	696	716	691
	1.273	693.5	716	696
	1.274	695.5	715	694
	1.275	693.5	712	693
	1.276	697.5	711	691.5
	1.277	697	713	691.5
	1.278	701	711	692.5
	1.279	693.5	705.5	696
	1.28	694.5	707.5	695.5
	1.281	696	711	691.5
	1.282	693.5	709.5	690.5
	1.283	693	709.5	695.5
	1.284	700	709	693.5
	1.285	693	705.5	695
	1.286	694	703.5	694.5
	1.287	692.5	705.5	696
	1.288	695.5	702.5	696
	1.289	694	705	694
	1.29	690.5	702	692.5
	1.291	695	702	695.5
	1.292	694.5	703	690.5
	1.293	696	699.5	694.5
	1.294	696.5	698.5	693
	1.295	694	700	697
	1.296	693.5	697.5	697
	1.297	695	694	690.5
	1.298	690.5	698	696
	1.299	694.5	697	696
	1.3	694	695.5	694
	1.301	694	694.5	695.5
	1.302	693	691	693
	1.303	695.5	694	692
	1.304	695.5	693	694.5
	1.305	695	694.5	696.5
	1.306	690.5	690.5	692.5
	1.307	698.5	690.5	694.5
	1.308	696	690.5	692.5
	1.309	694.5	690.5	693
	1.31	693.5	689	694.5
	1.311	694.5	690.5	694.5
	1.312	694.5	688	693.5
	1.313	696.5	688	692
	1.314	694.5	690	692
	1.315	693.5	689	692.5
	1.316	693.5	688	692
	1.317	692.5	687	689.5
	1.318	693.5	690	692
	1.319	697.5	689	689.5
	1.32	696	684	692
	1.321	696	682.5	693.5
	1.322	697	686.5	692
	1.323	697.5	684.5	690.5
	1.324	697.5	683.5	690.5
	1.325	695.5	689	690
	1.326	696	686	692
	1.327	695	684.5	689.5
	1.328	695	685	690.5
	1.329	697	684	690.5
	1.33	697	685	688.5
	1.331	695.5	682	687
	1.332	698	685	690
	1.333	694.5	683.5	688
	1.334	695.5	685.5	689.5
	1.335	694	683.5	687.5
	1.336	692.5	683.5	687.5
	1.337	692.5	684.5	686.5
	1.338	695.5	683	687.5
	1.339	693	681.5	687.5
	1.34	694	683.5	682
	1.341	697	683	685
	1.342	693	686	684.5
	1.343	696	682.5	685.5
	1.344	698	684	684.5
	1.345	693	680	682
	1.346	693.5	684	684
	1.347	692	682.5	686.5
	1.348	690.5	681.5	681
	1.349	695	681.5	679
	1.35	690.5	684	682.5
	1.351	692.5	685	679.5
	1.352	690	684	683.5
	1.353	692.5	684.5	682.5
	1.354	690.5	682.5	676
	1.355	692	684	676
	1.356	693	685	677.5
	1.357	693	685	679
	1.358	693	686.5	674
	1.359	690.5	686	671
	1.36	693.5	686	673
	1.361	691	684.5	670.5
	1.362	690.5	686.5	670
	1.363	694.5	685.5	668
	1.364	690.5	684	663.5
	1.365	693	686.5	664
	1.366	691.5	683.5	660
	1.367	693	687	659.5
	1.368	695	687	655
	1.369	692	686.5	653
	1.37	693	688.5	652.5
	1.371	695.5	688	650
	1.372	695.5	687	650.5
	1.373	692	685	646
	1.374	690.5	686	646
	1.375	690.5	690	640.5
	1.376	693.5	687.5	639.5
	1.377	692	686	636
	1.378	693	690.5	634.5
	1.379	694.5	692	628
	1.38	690.5	690.5	625.5
	1.381	694	689	622.5
	1.382	694	690.5	616
	1.383	693	690.5	610.5
	1.384	694	690.5	606.5
	1.385	694.5	694	603.5
	1.386	695.5	690	601
	1.387	692	693.5	595.5
	1.388	696	690.5	589
	1.389	696.5	690.5	585.5
	1.39	697.5	690.5	579.5
	1.391	696.5	694	571.5
	1.392	693.5	694	568.5
	1.393	696.5	693.5	556.5
	1.394	694	692.5	551
	1.395	695	690.5	548
	1.396	699	696	536.5
	1.397	697.5	695.5	530.5
	1.398	698.5	693.5	522
	1.399	697.5	696.5	513
	1.4	699.5	695	505.5
	1.401	694	690.5	499
	1.402	699.5	698	488.5
	1.403	699.5	695	478
	1.404	696.5	697.5	471.5
	1.405	696.5	692.5	462
	1.406	697.5	695.5	448.5
	1.407	698	693.5	441.5
	1.408	698	695.5	428
	1.409	699	694	417
	1.41	697.5	696	407.5
	1.411	697	693.5	396.5
	1.412	696	694	389.5
	1.413	701.5	698.5	379
	1.414	700	698.5	366
	1.415	700	697	358.5
	1.416	697	693	348.5
	1.417	704	693.5	334.5
	1.418	701.5	697.5	325.5
	1.419	700	694.5	316.5
	1.42	703.5	696.5	307
	1.421	700	695.5	297.5
	1.422	702.5	697	287
	1.423	702	690.5	279
	1.424	698	696	266.5
	1.425	702.5	695.5	259
	1.426	704	694.5	253.5
	1.427	702	696.5	243
	1.428	700	694	236.5
	1.429	704.5	695	230
	1.43	704	697.5	219.5
	1.431	703	692	213.5
	1.432	700.5	694	209
	1.433	700.5	693.5	201
	1.434	705.5	693	198.5
	1.435	703.5	697.5	190.5
	1.436	703.5	694.5	185.5
	1.437	703	692.5	179.5
	1.438	702.5	697	176
	1.439	702.5	694.5	171
	1.44	702.5	696	163.5
	1.441	699.5	698	159.5
	1.442	701.5	694.5	154.5
	1.443	701.5	693.5	151.5
	1.444	704	694	144
	1.445	701.5	696.5	138
	1.446	701.5	697	137
	1.447	700	695	134.5
	1.448	701.5	696	129
	1.449	701.5	696.5	124.5
	1.45	700	693.5	123
	1.451	699.5	692.5	116.5
	1.452	697.5	696.5	115.5
	1.453	699.5	697.5	113.5
	1.454	700.5	695.5	109
	1.455	703.5	693.5	106.5
	1.456	704.5	695	105
	1.457	697.5	696	104
	1.458	700.5	696	97
	1.459	699	693.5	96
	1.46	698.5	693	93.5
	1.461	700	697	90.5
	1.462	699	695.5	88.5
	1.463	698	693.5	85
	1.464	698.5	698	85
	1.465	695.5	693.5	83
	1.466	699	692	81
	1.467	698	692.5	79
	1.468	697.5	692	80
	1.469	698	695	77
	1.47	698.5	692	73
	1.471	696	690.5	70
	1.472	697.5	695	71
	1.473	696.5	695.5	66.5
	1.474	696	690.5	67
	1.475	699	693.5	69.5
	1.476	699.5	693.5	68.5
	1.477	697.5	690.5	66.5
	1.478	697.5	689.5	62
	1.479	699	693	64
	1.48	696	695	62.5
	1.481	697	693.5	58.5
	1.482	699.5	692	56
	1.483	698.5	690.5	55.5
	1.484	697.5	694	57
	1.485	695.5	693	51
	1.486	696	692.5	54
	1.487	696	692	51.5
	1.488	695.5	692.5	52.5
	1.489	696.5	692	51.5
	1.49	697	693.5	49.5
	1.491	696	690.5	46.5
	1.492	692	688.5	47
	1.493	693.5	690.5	43
	1.494	696.5	693.5	43.5
	1.495	695.5	692.5	41
	1.496	690.5	693	43.5
	1.497	695.5	689	42.5
	1.498	692.5	690.5	40
	1.499	691.5	691.5	37.5
	1.5	694	693.5	39.5
	1.501	692.5	690.5	39.5
	1.502	691.5	693	34.5
	1.503	692	692.5	37.5
	1.504	690.5	690.5	40.5
	1.505	694	690.5	35
	1.506	692.5	690.5	35
	1.507	693.5	690.5	31
	1.508	695.5	690.5	34
	1.509	689.5	692.5	34
	1.51	690.5	689.5	34
	1.511	692	690	34.5
	1.512	696	690	30.5
	1.513	693.5	693.5	34.5
	1.514	690.5	690.5	29.5
	1.515	690.5	690.5	30.5
	1.516	693	691.5	28
	1.517	692	690.5	30
	1.518	693.5	689	30.5
	1.519	689.5	689	29.5
	1.52	690.5	689	26
	1.521	690.5	690.5	27.5
	1.522	693	692.5	26
	1.523	690	690.5	26.5
	1.524	689	691.5	23.5
	1.525	690	690.5	24
	1.526	689	692	23
	1.527	691.5	690.5	24.5
	1.528	692	690.5	22
	1.529	690.5	690.5	27.5
	1.53	693.5	690	24.5
	1.531	689	693	25
	1.532	693.5	692.5	24.5
	1.533	687	693.5	22
	1.534	690.5	692	24.5
	1.535	693.5	689	22
	1.536	692	695	23
	1.537	689	690.5	25
	1.538	693.5	692.5	27.5
	1.539	694	691.5	25
	1.54	693	691.5	27
	1.541	690.5	692	25
	1.542	695.5	693	27.5
	1.543	690	690	28
	1.544	693.5	695	25.5
	1.545	695.5	693.5	27
	1.546	692	690.5	30.5
	1.547	690	694.5	30.5
	1.548	695.5	693	32
	1.549	692.5	690.5	33
	1.55	693.5	693	35.5
	1.551	693.5	692.5	37
	1.552	690.5	694.5	40
	1.553	697.5	692.5	37
	1.554	694	695	38.5
	1.555	695.5	693.5	40.5
	1.556	696	695	39.5
	1.557	692	692	44.5
	1.558	697.5	696	44
	1.559	696	693.5	47
	1.56	695.5	693	47.5
	1.561	698	697.5	53.5
	1.562	698	696	50
	1.563	696.5	697	55.5
	1.564	697	692.5	54.5
	1.565	699.5	692	60.5
	1.566	697.5	697	59
	1.567	698	697	61.5
	1.568	701	693.5	62.5
	1.569	701	696.5	68.5
	1.57	699.5	694.5	68
	1.571	700.5	690.5	69
	1.572	700.5	693.5	73.5
	1.573	700	692	75
	1.574	699	690	75.5
	1.575	702	696.5	80
	1.576	699	691.5	82
	1.577	703	690.5	87
	1.578	697.5	694.5	87
	1.579	701.5	690.5	88.5
	1.58	702	692.5	92.5
	1.581	703.5	692.5	95
	1.582	700.5	694	102.5
	1.583	700.5	692.5	104
	1.584	702.5	692.5	109
	1.585	697.5	690.5	116
	1.586	700	695	118.5
	1.587	699.5	693.5	124.5
	1.588	702	692	131.5
	1.589	701.5	690.5	139
	1.59	700	690.5	143.5
	1.591	700.5	689	146
	1.592	703	690.5	152.5
	1.593	701.5	692	158
	1.594	699	692.5	163.5
	1.595	700	690.5	170.5
	1.596	699	690.5	171
	1.597	698.5	690	180
	1.598	695.5	691.5	187.5
	1.599	694.5	689	191.5
	1.6	693.5	689.5	200
	1.601	695.5	690.5	204
	1.602	696.5	691.5	217
	1.603	691.5	692	224
	1.604	695	690.5	239
	1.605	693.5	690.5	254
	1.606	692.5	693.5	273.5
	1.607	694	690	286.5
	1.608	690.5	689	306
	1.609	690	690	317
	1.61	690.5	688.5	327
	1.611	690.5	688	340.5
	1.612	688.5	693.5	346.5
	1.613	686	689	351.5
	1.614	685	692	357
	1.615	689	687.5	352.5
	1.616	684	693.5	354.5
	1.617	682	693	351.5
	1.618	681	693.5	350
	1.619	683	693.5	345.5
	1.62	680.5	689	346
	1.621	678.5	692	341.5
	1.622	680	692.5	337
	1.623	681	692.5	331.5
	1.624	678	695.5	333
	1.625	676	692	330.5
	1.626	676	694.5	328
	1.627	674.5	693	329.5
	1.628	676	696.5	322
	1.629	672.5	695	327
	1.63	675	693	327
	1.631	670	697	328
	1.632	668.5	693	337
	1.633	667	693	336
	1.634	670	697	334
	1.635	666	693	344
	1.636	669.5	696.5	347
	1.637	666	695.5	353.5
	1.638	668	693.5	364
	1.639	663.5	695.5	369
	1.64	665.5	697	377.5
	1.641	667	693	384
	1.642	662.5	693	396
	1.643	663.5	695	409
	1.644	662	695	417
	1.645	661	694.5	430
	1.646	663	699	449
	1.647	658	695.5	460.5
	1.648	658	695.5	473.5
	1.649	656	693.5	493.5
	1.65	656.5	699	510
	1.651	655	700	522.5
	1.652	656.5	697.5	541
	1.653	652.5	697.5	558.5
	1.654	656	693.5	580.5
	1.655	652	697.5	597.5
	1.656	651	697	618.5
	1.657	655.5	698	635
	1.658	649.5	698	658
	1.659	646	700.5	678.5
	1.66	650.5	699.5	702
	1.661	648.5	703.5	726
	1.662	646	699	753
	1.663	646	697	781.5
	1.664	639.5	698	807
	1.665	639	700	837
	1.666	636.5	698	868.5
	1.667	635.5	701	896.5
	1.668	632	700.5	929.5
	1.669	634.5	697.5	958.5
	1.67	629	702	989
	1.671	629.5	699.5	1024
	1.672	629.5	697	1056
	1.673	622	696.5	1084
	1.674	618	698.5	1117.5
	1.675	613	695.5	1143
	1.676	614.5	698	1173
	1.677	607.5	698.5	1197
	1.678	606.5	698	1220.5
	1.679	601.5	701.5	1247.5
	1.68	596.5	700	1267
	1.681	594.5	699.5	1296.5
	1.682	589	695.5	1313
	1.683	588	696	1335.5
	1.684	583	698.5	1356
	1.685	576	700.5	1374
	1.686	574.5	699	1391.5
	1.687	565.5	698.5	1406.5
	1.688	563.5	697.5	1421.5
	1.689	561.5	697.5	1436.5
	1.69	551	696	1450
	1.691	548.5	696	1457
	1.692	546.5	698.5	1466
	1.693	540.5	697.5	1476.5
	1.694	533.5	701.5	1481
	1.695	524	697.5	1496
	1.696	526.5	697.5	1505.5
	1.697	514.5	699	1511
	1.698	514	696.5	1522.5
	1.699	504.5	696.5	1531.5
	1.7	499	696.5	1540.5
	1.701	493	697	1547.5
	1.702	491	695.5	1555.5
	1.703	481	697.5	1570.5
	1.704	478.5	697.5	1581.5
	1.705	473.5	696	1593.5
	1.706	465	700.5	1600.5
	1.707	457	696.5	1620
	1.708	450.5	695	1630
	1.709	444	696.5	1645
	1.71	441	698.5	1658.5
	1.711	434	694	1670.5
	1.712	428	697	1681
	1.713	418.5	697.5	1689.5
	1.714	413	700	1709
	1.715	405	696.5	1719.5
	1.716	402	697	1734.5
	1.717	394.5	694	1749.5
	1.718	386.5	697	1763
	1.719	378	698	1777
	1.72	369	695	1787
	1.721	363	696	1801.5
	1.722	356.5	699.5	1812.5
	1.723	348.5	696	1824
	1.724	345.5	696.5	1834
	1.725	336	697.5	1839
	1.726	328	697.5	1853.5
	1.727	322	696.5	1862
	1.728	317.5	695.5	1868.5
	1.729	308	699.5	1878.5
	1.73	299	696	1883.5
	1.731	294.5	699	1891
	1.732	288	696	1894.5
	1.733	280	695	1898.5
	1.734	273.5	699	1898.5
	1.735	267.5	695	1913
	1.736	266.5	696	1918
	1.737	257.5	696.5	1921
	1.738	250.5	697	1928.5
	1.739	246.5	694.5	1933.5
	1.74	239	699	1943
	1.741	233.5	697.5	1942.5
	1.742	228.5	698	1949.5
	1.743	226	697.5	1955
	1.744	218	696.5	1958
	1.745	216	701	1967.5
	1.746	208.5	696	1967.5
	1.747	205	699.5	1973
	1.748	201.5	698.5	1981.5
	1.749	198	698	1985
	1.75	194.5	699.5	1987
	1.751	190.5	700	1988
	1.752	190.5	695.5	2001.5
	1.753	182	697.5	2003
	1.754	182	697.5	2009
	1.755	181.5	701	2011.5
	1.756	179.5	696.5	2017.5
	1.757	174	700.5	2017.5
	1.758	172	696	2017.5
	1.759	169.5	698.5	2029.5
	1.76	170	696.5	2031.5
	1.761	168	701.5	2038
	1.762	170	695.5	2041.5
	1.763	166.5	700	2040
	1.764	165.5	698.5	2045.5
	1.765	168	701.5	2044
	1.766	163.5	697.5	2053
	1.767	162.5	695.5	2052
	1.768	162.5	694	2056
	1.769	161.5	696.5	2059.5
	1.77	160.5	696	2062.5
	1.771	160	695.5	2062
	1.772	158.5	697	2062.5
	1.773	155.5	700	2062.5
	1.774	157	695.5	2072.5
	1.775	159	697.5	2072
	1.776	155.5	698	2077.5
	1.777	150	694	2077.5
	1.778	155	698.5	2077.5
	1.779	152	696.5	2087
	1.78	150.5	697	2077.5
	1.781	149.5	699	2077.5
	1.782	151.5	698.5	2087
	1.783	150	697.5	2088.5
	1.784	150	696.5	2090.5
	1.785	151.5	696	2091
	1.786	149	700.5	2089.5
	1.787	150	696.5	2077.5
	1.788	152	695.5	2077.5
	1.789	151.5	699	2077.5
	1.79	147.5	698.5	2077.5
	1.791	148.5	699.5	2077.5
	1.792	151	696.5	2076
	1.793	145	695	2077.5
	1.794	149	697.5	2077.5
	1.795	150.5	696.5	2072.5
	1.796	150	696	2072.5
	1.797	146.5	700	2069
	1.798	148.5	699	2069
	1.799	150	698.5	2062.5
	1.8	154	699	2057.5
	1.801	149.5	697.5	2055
	1.802	149	698	2051.5
	1.803	150	700	2047.5
	1.804	150	698.5	2042
	1.805	150.5	700	2042.5
	1.806	151.5	697	2032.5
	1.807	151	698	2030
	1.808	149	700	2027
	1.809	149	702	2017.5
	1.81	150.5	701	2015.5
	1.811	150	705	2003
	1.812	151	699	2003
	1.813	147.5	698.5	1999
	1.814	144	702	1986
	1.815	145	701	1983
	1.816	147.5	697.5	1973
	1.817	146.5	700	1969.5
	1.818	143.5	702.5	1958
	1.819	142.5	700	1949.5
	1.82	139	699	1948
	1.821	142.5	699.5	1939.5
	1.822	136.5	699	1928.5
	1.823	136	699.5	1919.5
	1.824	137.5	701	1913.5
	1.825	137	700	1898.5
	1.826	132.5	698.5	1898.5
	1.827	130.5	700	1890
	1.828	131	697.5	1882
	1.829	132.5	700.5	1878
	1.83	131	699	1868.5
	1.831	124.5	700.5	1864.5
	1.832	124	695.5	1858
	1.833	123	697.5	1848
	1.834	125.5	698	1839
	1.835	120.5	699.5	1833.5
	1.836	119	701	1824
	1.837	116.5	696	1819
	1.838	116	696.5	1809
	1.839	114.5	695.5	1806
	1.84	114.5	694.5	1800
	1.841	111.5	692.5	1790.5
	1.842	112.5	697	1778.5
	1.843	112	690.5	1772.5
	1.844	109	695.5	1764
	1.845	111	695.5	1757
	1.846	108.5	692.5	1746.5
	1.847	107.5	692.5	1739.5
	1.848	107.5	692	1731.5
	1.849	108.5	690.5	1719.5
	1.85	105	693.5	1718.5
	1.851	105	692.5	1704.5
	1.852	107.5	690.5	1698.5
	1.853	105.5	693.5	1689.5
	1.854	102.5	690.5	1685
	1.855	102	690.5	1675
	1.856	102.5	690.5	1672.5
	1.857	108	687	1660
	1.858	107.5	690.5	1655.5
	1.859	108.5	694	1645
	1.86	104.5	690	1640
	1.861	109	692	1630
	1.862	106.5	692.5	1628.5
	1.863	109.5	690.5	1619
	1.864	109	690.5	1610.5
	1.865	110.5	688.5	1606.5
	1.866	111	692.5	1598
	1.867	112.5	690	1593.5
	1.868	112	686.5	1585.5
	1.869	116	687.5	1580.5
	1.87	113.5	689	1578
	1.871	111.5	686	1568
	1.872	115.5	689	1563
	1.873	114.5	689.5	1555.5
	1.874	116.5	689.5	1552.5
	1.875	120	688	1547
	1.876	117.5	687	1540.5
	1.877	120.5	688	1536.5
	1.878	119	686.5	1529.5
	1.879	120	686.5	1525.5
	1.88	124	688	1521.5
	1.881	124	687	1511
	1.882	122	683.5	1511
	1.883	127.5	688	1504.5
	1.884	126.5	686	1503.5
	1.885	126.5	685	1496
	1.886	130.5	687	1493
	1.887	134	685	1491
	1.888	133.5	689	1481
	1.889	130	685.5	1481
	1.89	136.5	686.5	1481
	1.891	137	686.5	1478.5
	1.892	143.5	684.5	1474.5
	1.893	143	687.5	1470
	1.894	142.5	688.5	1466
	1.895	150	683	1466
	1.896	151	688	1460
	1.897	151	686	1457.5
	1.898	152	685.5	1451
	1.899	154.5	688.5	1451
	1.9	158.5	686.5	1451
	1.901	164.5	690	1449.5
	1.902	169	684	1448.5
	1.903	167.5	686	1445
	1.904	171.5	687	1443
	1.905	176	689	1443
	1.906	181.5	689	1443
	1.907	181.5	689	1441.5
	1.908	185.5	690.5	1445.5
	1.909	192.5	685.5	1443
	1.91	195	687.5	1442.5
	1.911	203	693	1440
	1.912	205	690.5	1441.5
	1.913	208.5	690	1436.5
	1.914	216	691.5	1439.5
	1.915	219.5	690.5	1436.5
	1.916	223	690.5	1436.5
	1.917	228	690.5	1436
	1.918	232.5	692	1433
	1.919	236.5	691.5	1433
	1.92	241	690.5	1428
	1.921	249.5	696.5	1428
	1.922	254	690	1421.5
	1.923	261	690.5	1427.5
	1.924	267.5	693	1421.5
	1.925	274.5	695.5	1421.5
	1.926	279	696.5	1421.5
	1.927	287	692.5	1421.5
	1.928	295.5	692.5	1421.5
	1.929	301.5	694.5	1421.5
	1.93	310.5	694	1420.5
	1.931	320.5	692.5	1421.5
	1.932	327.5	696.5	1421.5
	1.933	335	694.5	1430.5
	1.934	342	696	1432
	1.935	348.5	697	1432.5
	1.936	356	690.5	1431
	1.937	366.5	692.5	1434.5
	1.938	377.5	694	1435.5
	1.939	383	696	1436
	1.94	393.5	696.5	1436.5
	1.941	405	699	1436.5
	1.942	411.5	697.5	1441
	1.943	421.5	695	1436.5
	1.944	432.5	700.5	1443.5
	1.945	443	699	1448.5
	1.946	451	696.5	1450.5
	1.947	462.5	699.5	1459.5
	1.948	475.5	699	1460
	1.949	488.5	694.5	1466
	1.95	494.5	699	1466
	1.951	507.5	701	1466
	1.952	521.5	694.5	1471
	1.953	535.5	699.5	1470
	1.954	545	697.5	1472
	1.955	556.5	701	1474.5
	1.956	573	699	1473.5
	1.957	584.5	701	1476
	1.958	601.5	695	1477.5
	1.959	614.5	698.5	1477
	1.96	629	697.5	1481
	1.961	646	697.5	1489.5
	1.962	663.5	699.5	1481
	1.963	683	696	1481
	1.964	697.5	697.5	1490
	1.965	716.5	697.5	1491
	1.966	733	693	1492
	1.967	758.5	695.5	1493.5
	1.968	777	698.5	1491.5
	1.969	795	696.5	1496
	1.97	820	698	1495
	1.971	842.5	697.5	1495.5
	1.972	868.5	699	1500.5
	1.973	894.5	697.5	1503
	1.974	914.5	690.5	1502
	1.975	940	697	1496
	1.976	968.5	696.5	1501
	1.977	989	695.5	1505.5
	1.978	1014.5	696.5	1502.5
	1.979	1037.5	695	1505
	1.98	1062.5	694.5	1508.5
	1.981	1082	697	1506.5
	1.982	1111	694.5	1508
	1.983	1129.5	695.5	1505
	1.984	1153	694	1508.5
	1.985	1176	696.5	1506.5
	1.986	1191.5	694.5	1508.5
	1.987	1211	694.5	1507
	1.988	1227.5	690.5	1506.5
	1.989	1242.5	694.5	1507
	1.99	1260.5	693	1503
	1.991	1282	696.5	1508
	1.992	1293	690.5	1507
	1.993	1306.5	694.5	1508
[truncated: 13,006 more rows]

## Sheet: D
DataTypeVer2.0	Time	Fz	Fz	Fz
NumberOfData		8000	8000	8000
PreTriggerData		0	0	0
SamplingTime[ms]		1	1	1
DataLabel		M1:CMJ	M2:CMJ	M3:CMJ
DataUnit	sec	N	N	N
	0	629	617.5	626
	0.001	624.5	618	623
	0.002	625.5	618.5	623.5
	0.003	627	622	627
	0.004	626.5	618.5	626.5
	0.005	625.5	618.5	622.5
	0.006	624.5	619	624
	0.007	625	618.5	624
	0.008	628.5	619.5	623.5
	0.009	628.5	615.5	621.5
	0.01	624.5	617.5	620.5
	0.011	629	617.5	620
	0.012	625.5	617.5	622.5
	0.013	625	616	621.5
	0.014	623.5	620.5	622.5
	0.015	627	615.5	625
	0.016	626.5	616	622
	0.017	622	616	618.5
	0.018	622.5	612	622.5
	0.019	624	617.5	623
	0.02	625.5	615.5	621
	0.021	629	615.5	619.5
	0.022	625.5	619	623.5
	0.023	625.5	615.5	622.5
	0.024	626	618.5	619.5
	0.025	623.5	615.5	619
	0.026	627	616	619
	0.027	624.5	617	622.5
	0.028	627	616.5	622
	0.029	627	620.5	621.5
	0.03	624	617.5	623
	0.031	624.5	619.5	621
	0.032	622	618.5	621.5
	0.033	624	617	620
	0.034	626	618	621.5
	0.035	623.5	621	621.5
	0.036	627	618.5	619.5
	0.037	623	622.5	621.5
	0.038	627	619.5	622
	0.039	625.5	622	619.5
	0.04	626	622	618
	0.041	625.5	623	622.5
	0.042	623	622.5	623
	0.043	626.5	622	618
	0.044	625.5	624.5	619.5
	0.045	626	623.5	622.5
	0.046	625	625	619.5
	0.047	623.5	627	621
	0.048	625.5	624	623
	0.049	627	625	620
	0.05	625.5	623.5	619
	0.051	627	627	623
	0.052	626.5	629	620.5
	0.053	629.5	627	621.5
	0.054	627	627	616
	0.055	627	630.5	617.5
	0.056	627	629	619
	0.057	627	629	616.5
	0.058	629.5	627	616.5
	0.059	625.5	628.5	621
	0.06	628	632.5	617.5
	0.061	625	634	616
	0.062	625	635	615.5
	0.063	626	633	616
	0.064	627	631.5	612
	0.065	629	633	617.5
	0.066	629	632	615.5
	0.067	624.5	633.5	615.5
	0.068	627	633.5	616.5
	0.069	630	632.5	615.5
	0.07	629	633	612
	0.071	629.5	633.5	616.5
	0.072	630.5	630.5	614.5
	0.073	627	633	612
	0.074	627	635.5	612
	0.075	626.5	633.5	615
	0.076	632.5	632.5	612
	0.077	629	632	612
	0.078	626	635.5	612
	0.079	630.5	635.5	612
	0.08	627	632	612
	0.081	629	634.5	612
	0.082	628.5	634.5	611
	0.083	629.5	632	612
	0.084	629.5	632	610.5
	0.085	629.5	636	610.5
	0.086	628.5	632	612
	0.087	629.5	636	614.5
	0.088	629	630	610.5
	0.089	629	631	609
	0.09	629	635.5	611
	0.091	630.5	630	612
	0.092	632	636	610
	0.093	631	630.5	612
	0.094	631	629	608.5
	0.095	625.5	625.5	615
	0.096	629	629	609
	0.097	629	630	615.5
	0.098	629	630.5	607.5
	0.099	631.5	627	606.5
	0.1	631	627	608.5
	0.101	633	627	608.5
	0.102	630.5	624	608.5
	0.103	630	626	609
	0.104	632.5	626.5	607
	0.105	628.5	626	608.5
	0.106	629.5	624.5	611
	0.107	630.5	622.5	609.5
	0.108	630.5	623.5	608.5
	0.109	629.5	621.5	608.5
	0.11	633	620.5	608.5
	0.111	629	618	610.5
	0.112	629.5	617	607.5
	0.113	628.5	614	608.5
	0.114	629	615	609.5
	0.115	635.5	612	611
	0.116	629	616	611
	0.117	629.5	615	610
	0.118	630	614.5	611.5
	0.119	632	612	611
	0.12	627	611.5	610
	0.121	626	612	612
	0.122	628.5	611	615
	0.123	627	607	612
	0.124	630	604.5	612
	0.125	626.5	604.5	614.5
	0.126	627	605	611.5
	0.127	626.5	602.5	614
	0.128	629	602.5	612
	0.129	627	602	611.5
	0.13	627	597	615.5
	0.131	627	598	615
	0.132	624	597	612
	0.133	626	598.5	612
	0.134	624	597	615.5
	0.135	622.5	596	615.5
	0.136	626	595.5	615.5
	0.137	626.5	594	615.5
	0.138	627	592	619
	0.139	627	593	619.5
	0.14	627	591	622
	0.141	626.5	588	618
	0.142	625.5	590	620.5
	0.143	624	586.5	619
	0.144	624.5	589	619
	0.145	623	589	625
	0.146	621	588	621
	0.147	623	590	623.5
	0.148	624.5	588	621.5
	0.149	624.5	586	623.5
	0.15	628.5	587	623
	0.151	624.5	588	622
	0.152	626.5	587.5	625.5
	0.153	627	588	623
	0.154	625.5	587	626.5
	0.155	624.5	582	628.5
	0.156	625.5	587.5	622
	0.157	626	590.5	625
	0.158	624	588	624
	0.159	626	590	627
	0.16	629.5	586	627
	0.161	629.5	588.5	625
	0.162	628.5	589.5	626
	0.163	624	588.5	629
	0.164	628	589.5	631
	0.165	626.5	590.5	630
	0.166	627	593	635
	0.167	626	593.5	630
	0.168	623.5	595	627
	0.169	626	595.5	632
	0.17	627	598.5	630.5
	0.171	624.5	594.5	629.5
	0.172	629.5	596	631.5
	0.173	629	596.5	630
	0.174	625	598	630
	0.175	627	599	633
	0.176	626	600.5	632
	0.177	625.5	602	633.5
	0.178	628	604.5	636
	0.179	629	604	640
	0.18	632	606	633.5
	0.181	626.5	606	638.5
	0.182	626	606.5	635
	0.183	630	608	638.5
	0.184	628.5	611.5	635.5
	0.185	625.5	609.5	638.5
	0.186	629.5	611	639.5
	0.187	630.5	610.5	637
	0.188	627	612	639
	0.189	627	616.5	640
	0.19	630	616	640.5
	0.191	631.5	617.5	638
	0.192	625	621.5	638
	0.193	631	622	640.5
	0.194	631	619	641
	0.195	631	622	639.5
	0.196	626.5	624	640
	0.197	629	623	640.5
	0.198	631.5	626	639
	0.199	627	625	639
	0.2	629.5	629.5	639.5
	0.201	630.5	633	637.5
	0.202	632.5	631	641
	0.203	630.5	633.5	639
	0.204	626.5	633	644
	0.205	631.5	636.5	641.5
	0.206	629	636	639.5
	0.207	629	636.5	639.5
	0.208	631.5	636	638
	0.209	631.5	637	640.5
	0.21	631.5	643	637.5
	0.211	632.5	637.5	642
	0.212	629	639	641.5
	0.213	630.5	640	639
	0.214	633	643.5	638
	0.215	631	644.5	638
	0.216	628.5	645	640
	0.217	630	648	639.5
	0.218	630	647	638
	0.219	630.5	642	637.5
	0.22	630.5	644.5	639.5
	0.221	633.5	646.5	634.5
	0.222	629.5	648.5	639
	0.223	634.5	647	637.5
	0.224	628.5	649	635.5
	0.225	626	647	635
	0.226	628.5	653.5	639
	0.227	632.5	650	636
	0.228	635.5	650.5	635
	0.229	627	647.5	636
	0.23	634.5	649	631
	0.231	631.5	649.5	636
	0.232	630.5	649.5	633
	0.233	632.5	646	634.5
	0.234	630.5	651.5	631
	0.235	634.5	649.5	634.5
	0.236	629.5	650.5	634
	0.237	633.5	651.5	634.5
	0.238	628.5	654	631
	0.239	633	654.5	631
	0.24	626	651.5	632
	0.241	629	650	630.5
	0.242	629.5	651.5	634.5
	0.243	629	652.5	630.5
	0.244	631	649.5	631.5
	0.245	631.5	649	630.5
	0.246	629	651	630
	0.247	631	653.5	630.5
	0.248	632.5	649.5	630.5
	0.249	633.5	649.5	631.5
	0.25	633	652	632.5
	0.251	630	652.5	630
	0.252	629	654	630
	0.253	631.5	649	631.5
	0.254	632.5	651	631.5
	0.255	631	650.5	629.5
	0.256	629	649.5	630
	0.257	632.5	651	629
	0.258	632.5	650.5	630.5
	0.259	631	649.5	630.5
	0.26	632	652.5	633
	0.261	634	648.5	629.5
	0.262	630.5	648	630.5
	0.263	629.5	650	629
	0.264	632.5	651	630
	0.265	632	653	633
	0.266	629	650	629.5
	0.267	628	649	630.5
	0.268	632	650	629
	0.269	631.5	650	631.5
	0.27	634	647.5	629
	0.271	635	649	629.5
	0.272	630	649.5	631.5
	0.273	629.5	650.5	631.5
	0.274	632.5	648.5	630.5
	0.275	634.5	648.5	627
	0.276	629	646.5	628.5
	0.277	631	648	632
	0.278	633.5	649.5	629.5
	0.279	631	645	629
	0.28	629.5	647	634.5
	0.281	629.5	645.5	631.5
	0.282	627	645.5	633
	0.283	628.5	645.5	631
	0.284	629.5	642	632
	0.285	631	645.5	629.5
	0.286	629	640.5	633
	0.287	632.5	642.5	635.5
	0.288	627	646	632.5
	0.289	627	641	627
	0.29	632.5	643	630.5
	0.291	629	645	631.5
	0.292	632	643	631.5
	0.293	626	645.5	632.5
	0.294	630	641	633.5
	0.295	629.5	643	634
	0.296	622	642	633.5
	0.297	629	641	634.5
	0.298	626.5	640	636
	0.299	625.5	640.5	636.5
	0.3	628	636.5	630.5
	0.301	629.5	636	631.5
	0.302	627	640.5	633.5
	0.303	627	640.5	634
	0.304	624.5	634.5	637
	0.305	625	637	636.5
	0.306	628.5	638.5	635.5
	0.307	622.5	632.5	635.5
	0.308	623.5	637	632.5
	0.309	624	632	635.5
	0.31	626.5	636	634.5
	0.311	625	632	633.5
	0.312	626	632	635
	0.313	624.5	632.5	635
	0.314	623.5	631	634.5
	0.315	622	629.5	636
	0.316	624	631.5	639.5
	0.317	626	634.5	635.5
	0.318	623	634	634.5
	0.319	621.5	631.5	634.5
	0.32	623	631.5	633
	0.321	623.5	630.5	635
	0.322	620	630	636
	0.323	623	632	634.5
	0.324	620.5	629	631
	0.325	621	629	635
	0.326	624	629.5	633
	0.327	624	627	634.5
	0.328	623.5	629.5	632.5
	0.329	619.5	626.5	632
	0.33	622.5	629	631.5
	0.331	622	628.5	634
	0.332	619	627	631
	0.333	625	629.5	629
	0.334	623	623.5	631.5
	0.335	620.5	626.5	632.5
	0.336	622	625	633.5
	0.337	622	624	629.5
	0.338	620.5	623	631.5
	0.339	617.5	624.5	631
	0.34	618.5	625	629.5
	0.341	622.5	626.5	632
	0.342	620.5	621.5	626.5
	0.343	621.5	623	629
	0.344	617	624	626.5
	0.345	621	623.5	629
	0.346	620.5	620	631
	0.347	621	621.5	629.5
	0.348	619	622.5	629.5
	0.349	621.5	619.5	626.5
	0.35	622	616	630
	0.351	620	622	630.5
	0.352	619	621	628.5
	0.353	622	620.5	627
	0.354	622	622	629
	0.355	618	620.5	626.5
	0.356	620	619	626
	0.357	619.5	621.5	624.5
	0.358	617.5	620	626
	0.359	618	620	627
	0.36	619	622	627
	0.361	617	617	626.5
	0.362	618	621.5	624.5
	0.363	619.5	621.5	627
	0.364	617.5	622	624
	0.365	624	622	623
	0.366	620	619.5	625
	0.367	621.5	623.5	625.5
	0.368	622	620.5	625
	0.369	619.5	621	628.5
	0.37	616.5	619	626.5
	0.371	615.5	623	625
	0.372	618	622	623.5
	0.373	621	622	619.5
	0.374	620.5	620.5	624
	0.375	617.5	620	626.5
	0.376	618.5	624	621
	0.377	619.5	621.5	622.5
	0.378	618.5	624.5	622.5
	0.379	619.5	623.5	622.5
	0.38	622	627	623.5
	0.381	618.5	619.5	618.5
	0.382	622	625	626.5
	0.383	619.5	624.5	622.5
	0.384	619.5	626	625.5
	0.385	620.5	623	625.5
	0.386	622	626	625
	0.387	623.5	621	623
	0.388	621.5	625	623.5
	0.389	621.5	625.5	622
	0.39	621	622	622
	0.391	621.5	625	623.5
	0.392	621	627	621.5
	0.393	622	624	621
	0.394	622	623	624
	0.395	621.5	623	621.5
	0.396	619	622	623
	0.397	621	622	623.5
	0.398	621	625	619.5
	0.399	622.5	623	623.5
	0.4	621	623	622.5
	0.401	624.5	625	624.5
	0.402	622	624	625
	0.403	623	625	623
	0.404	623	621	624.5
	0.405	624.5	621	624.5
	0.406	627	625.5	622
	0.407	621.5	625.5	623.5
	0.408	622	622.5	619.5
	0.409	625	624	619
	0.41	622.5	622	623.5
	0.411	620.5	627	627
	0.412	622	621.5	625
	0.413	624.5	623.5	620.5
	0.414	621	621	623.5
	0.415	623	623.5	621.5
	0.416	623	618	622
	0.417	621.5	623.5	624.5
	0.418	620	622	622
	0.419	620	622	623.5
	0.42	620	617	625.5
	0.421	623	618	622
	0.422	621	622.5	621.5
	0.423	619.5	618.5	622.5
	0.424	622	617	623
	0.425	617.5	619	620.5
	0.426	617.5	620.5	624.5
	0.427	621	617.5	624.5
	0.428	619.5	617	621
	0.429	616.5	617.5	621.5
	0.43	617.5	620	625
	0.431	618	617.5	622.5
	0.432	619	618.5	620
	0.433	616.5	619.5	624.5
	0.434	612	618.5	623
	0.435	612	617.5	624.5
	0.436	614.5	621	622
	0.437	611.5	622	622
	0.438	615.5	621.5	623
	0.439	612	620.5	619.5
	0.44	614.5	619	624.5
	0.441	612	620.5	622
	0.442	612	619.5	620.5
	0.443	612	619.5	621.5
	0.444	607.5	619	620
	0.445	607	621	617.5
	0.446	612	618.5	621
	0.447	612	620.5	622
	0.448	609.5	620.5	622
	0.449	609	626.5	621.5
	0.45	608.5	616.5	621.5
	0.451	608	623	624
	0.452	610	619.5	619.5
	0.453	608.5	625	622
	0.454	606.5	624.5	621.5
	0.455	607.5	621.5	622
	0.456	609	625	620.5
	0.457	605.5	624.5	622
	0.458	606.5	621.5	622
	0.459	605.5	625	625.5
	0.46	601	627	622
	0.461	599.5	625	621
	0.462	602	627	622.5
	0.463	603.5	623	622
	0.464	602	625	622.5
	0.465	602	629	619
	0.466	602	625.5	622
	0.467	603.5	627	620
	0.468	603.5	627	621.5
	0.469	602	630.5	622
	0.47	606.5	627	622
	0.471	599.5	629	624.5
	0.472	600.5	631.5	621
	0.473	601.5	631	624
	0.474	598.5	629.5	623.5
	0.475	604	627	622
	0.476	601.5	631	622.5
	0.477	601	627	623.5
	0.478	601.5	631	627
	0.479	601	629	622.5
	0.48	602.5	626	624
	0.481	601.5	629.5	624
	0.482	603	630.5	622
	0.483	601.5	633.5	624.5
	0.484	604	635	625.5
	0.485	601	635	621
	0.486	601	630.5	623
	0.487	601	631	620
	0.488	603	630.5	621
	0.489	603.5	633	624.5
	0.49	601	634.5	624
	0.491	603.5	631.5	621
	0.492	605.5	631.5	623
	0.493	608.5	631.5	624
	0.494	606	633	621
	0.495	605.5	629.5	623
	0.496	605.5	629	624
	0.497	605	634.5	621
	0.498	605	630.5	620.5
	0.499	608.5	633.5	621
	0.5	608	627	621
	0.501	604.5	630	621
	0.502	609.5	626.5	621
	0.503	609.5	629	618
	0.504	612	630	622
	0.505	612	631.5	617.5
	0.506	611	631.5	618.5
	0.507	610	632.5	618
	0.508	612	630.5	618.5
	0.509	612	630	621
	0.51	615.5	629	620
	0.511	614	631.5	616.5
	0.512	614	625	620
	0.513	616.5	629	615.5
	0.514	615.5	630	618.5
	0.515	615	627	619.5
	0.516	618.5	627	617.5
	0.517	615.5	626.5	615.5
	0.518	619	629	621
	0.519	619.5	620.5	619.5
	0.52	621	629	619.5
	0.521	622	626.5	616.5
	0.522	624	623	616.5
	0.523	622	622	619
	0.524	622	622	618
	0.525	622.5	625.5	614.5
	0.526	626	625	618.5
	0.527	622	625.5	614.5
	0.528	626.5	623.5	616
	0.529	622.5	625	616
	0.53	626	622.5	617.5
	0.531	627	622.5	616.5
	0.532	627	624	615.5
	0.533	626	622.5	612
	0.534	626	621	615.5
	0.535	631.5	627	617.5
	0.536	629.5	623	615
	0.537	631	622.5	612
	0.538	631.5	623	617
	0.539	632	626	619
	0.54	630.5	626.5	616.5
	0.541	631	624.5	614.5
	0.542	636	624.5	617
	0.543	633.5	626.5	614.5
	0.544	633.5	625.5	612
	0.545	636	624	612
	0.546	637	627	615
	0.547	633	626	615
	0.548	637	629	615.5
	0.549	636.5	626	610
	0.55	636	624.5	614
	0.551	641	629	611
	0.552	638	628.5	615.5
	0.553	640	630	615
	0.554	640	629	612
	0.555	638	631	612
	0.556	639	630.5	615.5
	0.557	641	630	609.5
	0.558	641	629.5	612
	0.559	640	634.5	615
	0.56	641.5	631	612
	0.561	641	634	612
	0.562	641.5	631	614.5
	0.563	640	636	617.5
	0.564	641	632	615.5
	0.565	638.5	634.5	617
	0.566	642.5	630.5	616
	0.567	640.5	633.5	612
	0.568	646	634.5	615.5
	0.569	638.5	635	618.5
	0.57	640.5	634	614.5
	0.571	639	635	612
	0.572	640.5	636	617.5
	0.573	642.5	636.5	617.5
	0.574	643	638	617
	0.575	642	635.5	615.5
	0.576	640	637	615.5
	0.577	639.5	636	619.5
	0.578	640	638.5	615
	0.579	641	633	622
	0.58	639	637.5	617.5
	0.581	641	636.5	620.5
	0.582	643	636.5	621
	0.583	640.5	636	618.5
	0.584	638	636.5	619
	0.585	641	635	621
	0.586	642	636.5	623
	0.587	640	639	620
	0.588	640.5	638	622
	0.589	639	638.5	620.5
	0.59	640	639.5	618
	0.591	640.5	640	621
	0.592	642	636.5	622
	0.593	638	638	622
	0.594	641	639.5	624.5
	0.595	638.5	639.5	619
	0.596	639.5	636.5	624
	0.597	638	637	625
	0.598	636.5	641	625
	0.599	639	636.5	627
	0.6	639	635.5	624
	0.601	638.5	638.5	628.5
	0.602	639	636	627
	0.603	636.5	635	627
	0.604	637.5	638	626
	0.605	636	632.5	626.5
	0.606	637	637.5	626.5
	0.607	632	635.5	627
	0.608	637.5	632.5	625
	0.609	636	633.5	629
	0.61	636	635.5	627
	0.611	634.5	633	628.5
	0.612	636	629.5	629
	0.613	635	629.5	629
	0.614	634.5	630	627
	0.615	636.5	624.5	629
	0.616	636	629	629.5
	0.617	633.5	629	627
	0.618	635.5	626	630
	0.619	635	626.5	627
	0.62	635.5	627	628.5
	0.621	634.5	625.5	631.5
	0.622	631	622.5	631
	0.623	635	625	631.5
	0.624	632.5	625	631.5
	0.625	634	622	633.5
	0.626	637.5	619.5	633.5
	0.627	632.5	626.5	632.5
	0.628	633.5	624.5	634.5
	0.629	635.5	619	634.5
	0.63	633	618	633
	0.631	634	622.5	632.5
	0.632	630.5	621	633.5
	0.633	635	618.5	636.5
	0.634	635.5	619.5	635.5
	0.635	633	619.5	635.5
	0.636	632	621	634
	0.637	633	617	637.5
	0.638	632.5	617	636
	0.639	631	618.5	637
	0.64	636.5	617.5	637.5
	0.641	637	616.5	637
	0.642	633	621.5	633
	0.643	630.5	617	637.5
	0.644	634	616	638
	0.645	633	617.5	636
	0.646	630	619	636
	0.647	633.5	617.5	638.5
	0.648	632	619.5	641
	0.649	635.5	617	636
	0.65	634	621	635
	0.651	631.5	617.5	639.5
	0.652	629.5	618	639
	0.653	632	619.5	640
	0.654	629.5	619.5	641.5
	0.655	632	619	637.5
	0.656	630	618.5	641
	0.657	629.5	618	637
	0.658	632.5	620.5	637
	0.659	630	617.5	640.5
	0.66	629	618	641.5
	0.661	630.5	618	637.5
	0.662	630	621.5	641
	0.663	628.5	618	641.5
	0.664	628	621	637.5
	0.665	630.5	619	641
	0.666	627	620.5	637.5
	0.667	630	620	643
	0.668	627	618.5	640.5
	0.669	626	619	640.5
	0.67	627	618.5	636.5
	0.671	629	618.5	637
	0.672	629	620	637.5
	0.673	627	619	640.5
	0.674	624	619	636.5
	0.675	629	619	637.5
	0.676	628	619	639
	0.677	629	622	638
	0.678	623	623.5	640
	0.679	625.5	623	641
	0.68	626	621	636
	0.681	625	622	640
	0.682	626	619	642
	0.683	622.5	621	640
	0.684	623	624	640
	0.685	621	624.5	634.5
	0.686	624	627	639
	0.687	624	626	638
	0.688	622.5	622	639.5
	0.689	623.5	626	640.5
	0.69	623	624.5	636
	0.691	623	623.5	638.5
	0.692	622.5	623	636
	0.693	619.5	626	637
	0.694	622.5	624	638.5
	0.695	622	624	637
	0.696	621	622.5	635.5
	0.697	619.5	627	636.5
	0.698	620.5	627	634.5
	0.699	616	623	636
	0.7	624.5	627	635
	0.701	622	625	635.5
	0.702	617	627	633.5
	0.703	621.5	628.5	634.5
	0.704	619.5	629.5	633
	0.705	621	624	630.5
	0.706	619.5	627	637.5
	0.707	623	626.5	632.5
	0.708	617	625	632
	0.709	621.5	625	633
	0.71	621.5	624	632.5
	0.711	624.5	623.5	633.5
	0.712	620.5	626.5	630.5
	0.713	619.5	625.5	634
	0.714	620.5	623	631.5
	0.715	621	629.5	631.5
	0.716	623.5	623	629
	0.717	620.5	624.5	630
	0.718	621	626.5	632.5
	0.719	622.5	622	629.5
	0.72	618.5	623	629.5
	0.721	621	622.5	629
	0.722	622.5	622.5	631.5
	0.723	625	623	632
	0.724	621	624.5	629.5
	0.725	625	623	625
	0.726	623	622.5	627
	0.727	622	625	629
	0.728	622.5	622	629
	0.729	623.5	619	630
	0.73	625.5	621	627
	0.731	622	622	627
	0.732	623.5	620	627
	0.733	629	620.5	625.5
	0.734	624	621	626.5
	0.735	626	619.5	624.5
	0.736	623	620.5	628.5
	0.737	623	621	622.5
	0.738	626.5	620.5	625
	0.739	626.5	619.5	622.5
	0.74	629	621	625.5
	0.741	625.5	624	627
	0.742	625.5	622	625
	0.743	625	621	625
	0.744	627	620.5	625
	0.745	629	619.5	624
	0.746	628	618.5	625
	0.747	625.5	620.5	623
	0.748	626	621	622.5
	0.749	628	622.5	626
	0.75	625.5	622	622
	0.751	630.5	621	622.5
	0.752	632.5	622	620.5
	0.753	629	622	623.5
	0.754	627	622	622.5
	0.755	629.5	626	621.5
	0.756	629	624.5	622
	0.757	629	621	623
	0.758	624	621.5	621
	0.759	627	622.5	622
	0.76	628.5	622	622.5
	0.761	626.5	621.5	619.5
	0.762	629	621	622.5
	0.763	624	621.5	619
	0.764	629	621.5	625.5
	0.765	629	622	622
	0.766	627	621.5	622
	0.767	624.5	621	620.5
	0.768	627	621.5	619.5
	0.769	629.5	621	623
	0.77	626	621.5	621.5
	0.771	627	622	622
	0.772	624.5	620.5	622
	0.773	627	621	621
	0.774	626	621.5	620
	0.775	624	625	625.5
	0.776	623.5	620.5	622.5
	0.777	625.5	622	626.5
	0.778	622	619.5	625
	0.779	624	619.5	624
	0.78	622	621.5	621
	0.781	625	624	622.5
	0.782	624.5	621.5	625
	0.783	624	621	623
	0.784	622.5	625	624.5
	0.785	624.5	626	620.5
	0.786	622	621	625
	0.787	619.5	622	623
	0.788	624	621.5	619.5
	0.789	625	623	618.5
	0.79	625	624.5	626
	0.791	623.5	624	626
	0.792	622.5	624.5	626
	0.793	625.5	623	629
	0.794	622	629	625
	0.795	623.5	623	624
	0.796	625	629	622.5
	0.797	624	628	630.5
	0.798	623.5	627	624
	0.799	623.5	626.5	626
	0.8	622	627	626.5
	0.801	626	629	628
	0.802	625.5	627	625
	0.803	624.5	628.5	628
	0.804	624	627	623
	0.805	626.5	624.5	628.5
	0.806	622.5	624	625.5
	0.807	618	625.5	626.5
	0.808	626.5	629	627
	0.809	625.5	629.5	625
	0.81	624.5	627	625.5
	0.811	624	630.5	625
	0.812	623	630.5	627
	0.813	624	629	627
	0.814	625	630.5	624.5
	0.815	625.5	627	622
	0.816	624.5	629	626.5
	0.817	624.5	630	627
	0.818	623	629.5	623.5
	0.819	622	629.5	626.5
	0.82	624	633	629
	0.821	622	627	626.5
	0.822	623	629	626
	0.823	626	627	627
	0.824	623.5	632.5	631
	0.825	622	630.5	626.5
	0.826	626	630	627
	0.827	623	627	627
	0.828	627	627	627
	0.829	626.5	629	626
	0.83	625.5	629.5	627
	0.831	623	627	630
	0.832	622	629.5	624.5
	0.833	623.5	628.5	627
	0.834	623	627	627
	0.835	622	629	625.5
	0.836	620.5	625	629.5
	0.837	622.5	628.5	625
	0.838	623.5	629	627
	0.839	624	626	625
	0.84	624	626	625
	0.841	625	627	624.5
	0.842	619.5	629	624
	0.843	626	629.5	627
	0.844	627	630.5	627
	0.845	624	627	627
	0.846	625	627	625
	0.847	627	626	627
	0.848	625.5	627	626
	0.849	624	627	627
	0.85	626.5	629	627
	0.851	627	627	620
	0.852	629	629.5	625
	0.853	632	626.5	627
	0.854	627	627	628.5
	0.855	627	627	624
	0.856	629	628.5	622
	0.857	627	627	626
	0.858	631	627	625.5
	0.859	628.5	628.5	623.5
	0.86	629	629	627
	0.861	633	627	624
	0.862	631.5	627	623.5
	0.863	629	629	624
	0.864	634.5	625.5	624.5
	0.865	633	629	627
	0.866	631	629	625.5
	0.867	635.5	631	629
	0.868	632	628	625.5
	0.869	633	627	625.5
	0.87	633.5	632.5	629.5
	0.871	635	629.5	627
	0.872	632.5	629	626.5
	0.873	630.5	632	627
	0.874	632.5	630	625.5
	0.875	633.5	627	627
	0.876	633.5	630	627
	0.877	632	629.5	627
	0.878	635.5	628.5	625.5
	0.879	634.5	626.5	627
	0.88	632	627	628.5
	0.881	631.5	630	630
	0.882	635.5	636	626.5
	0.883	636	634.5	624.5
	0.884	632.5	631	626.5
	0.885	632	630.5	626.5
	0.886	633	632.5	625
	0.887	632.5	632	625.5
	0.888	633.5	632.5	624.5
	0.889	631	631.5	625.5
	0.89	631.5	631	625.5
	0.891	630.5	632.5	627
	0.892	633.5	629.5	627
	0.893	629.5	631	624
	0.894	632	631.5	626
	0.895	631.5	633	623.5
	0.896	631	633.5	622.5
	0.897	629.5	631.5	625
	0.898	627	633	627
	0.899	628.5	629	624
	0.9	627	629.5	623
	0.901	628.5	630.5	623
	0.902	630	629.5	624
	0.903	627	629.5	621.5
	0.904	626.5	630.5	622.5
	0.905	627	632.5	622.5
	0.906	627	631	623
	0.907	627	632	620.5
	0.908	625	629	618.5
	0.909	627	629.5	620.5
	0.91	627	632	622
	0.911	626.5	631	623.5
	0.912	625.5	632.5	623
	0.913	627	632	619.5
	0.914	625	629.5	618.5
	0.915	623	630.5	621.5
	0.916	626	629	617
	0.917	627	633	620
	0.918	626	628.5	619
	0.919	625	629	623
	0.92	626.5	630	617.5
	0.921	625	634.5	619.5
	0.922	629	633	618.5
	0.923	624	633	618.5
	0.924	625.5	632.5	621.5
	0.925	623.5	632	620.5
	0.926	627	632	618.5
	0.927	627	633	618.5
	0.928	627	634	622
	0.929	627	634.5	619.5
	0.93	625.5	633	617
	0.931	623	632	620.5
	0.932	625.5	632.5	620.5
	0.933	626.5	633.5	621
	0.934	625	635.5	620.5
	0.935	624.5	633.5	622.5
	0.936	625.5	637	617.5
	0.937	627	635	621.5
	0.938	621.5	633	622
	0.939	625	632	621.5
	0.94	627	637.5	619.5
	0.941	625	635.5	618.5
	0.942	624	631.5	621.5
	0.943	625	633	622
	0.944	623	634.5	621.5
	0.945	624.5	634.5	619
	0.946	625	634	620.5
	0.947	623.5	634.5	617
	0.948	624	638	619.5
	0.949	622	636	619.5
	0.95	625	633.5	617.5
	0.951	623	633	618
	0.952	626	632.5	621.5
	0.953	621.5	634.5	621
	0.954	624.5	637	620.5
	0.955	625.5	635	620.5
	0.956	623.5	636	618
	0.957	625	637	620.5
	0.958	625.5	633	619.5
	0.959	622	634	622
	0.96	621.5	634.5	616.5
	0.961	626	631	621
	0.962	622	632.5	623.5
	0.963	624.5	634	623.5
	0.964	626	631.5	619
	0.965	624	635	617.5
	0.966	624.5	635.5	621
	0.967	623	634.5	621
	0.968	623	634	621.5
	0.969	623	638	620
	0.97	624.5	634	621
	0.971	623	635.5	619.5
	0.972	627	637.5	621
	0.973	625.5	638.5	619
	0.974	622.5	632.5	621.5
	0.975	624	635	623
	0.976	624	637	622.5
	0.977	621	636.5	621
	0.978	625	639.5	621.5
	0.979	622	642	621.5
	0.98	623	636	622
	0.981	622	638	619.5
	0.982	621.5	636.5	623
	0.983	620	637	618
	0.984	621	636	619
	0.985	621.5	636	621.5
	0.986	622.5	636.5	622
	0.987	624	638	622
	0.988	620	634	621.5
	0.989	621.5	637.5	620.5
	0.99	621.5	636.5	620.5
	0.991	621.5	637.5	623.5
	0.992	621.5	637.5	621.5
	0.993	618	637	621.5
	0.994	618	638.5	622.5
	0.995	621.5	637	621.5
	0.996	618.5	638	621.5
	0.997	618.5	638.5	620
	0.998	620	640	622
	0.999	622	636.5	617
	1	621	639.5	622
	1.001	619.5	637	620.5
	1.002	619.5	638	619.5
	1.003	619.5	639.5	620
	1.004	617	640.5	615.5
	1.005	617	637	617.5
	1.006	617.5	640.5	619.5
	1.007	619.5	639.5	617.5
	1.008	617	641.5	614.5
	1.009	619	640	615.5
	1.01	616.5	638.5	615.5
	1.011	617	638	617.5
	1.012	620	637.5	616.5
	1.013	619	640	614.5
	1.014	618.5	639	619
	1.015	617.5	641	615.5
	1.016	620.5	638.5	618
	1.017	617	635.5	617.5
	1.018	620.5	637.5	619
	1.019	619.5	634.5	617
	1.02	620	638.5	615
	1.021	620.5	634.5	612
	1.022	615.5	637	612
	1.023	621.5	638	615
	1.024	621	636	612
	1.025	619	639	616.5
	1.026	622	638.5	620
	1.027	619.5	639	617.5
	1.028	620	637	616
	1.029	621	640	617.5
	1.03	618	640.5	615
	1.031	620.5	637.5	619.5
	1.032	619.5	637	619.5
	1.033	621.5	636.5	619.5
	1.034	620.5	637	617
	1.035	617.5	635	620
	1.036	618	635.5	621
	1.037	622.5	636	617.5
	1.038	619.5	642	615.5
	1.039	622.5	636	617.5
	1.04	621.5	635	617
	1.041	622	637.5	621
	1.042	625	634.5	620
	1.043	622	638	618
	1.044	624	636	619.5
	1.045	624.5	637.5	621
	1.046	623	640.5	622.5
	1.047	624.5	636	618.5
	1.048	625	638	617
	1.049	623.5	636.5	619
	1.05	626	633	618
	1.051	623.5	639.5	619.5
	1.052	627	633.5	621.5
	1.053	628	637	621
	1.054	627	634	623.5
	1.055	627	637	621
	1.056	632.5	634.5	623
	1.057	630	633.5	625
	1.058	627	637	621
	1.059	629	633.5	625.5
	1.06	633.5	634	624.5
	1.061	629	636.5	627
	1.062	632.5	636.5	626.5
	1.063	633	634	624
	1.064	632	633.5	629
	1.065	633.5	635	627
	1.066	634.5	634.5	626
	1.067	636	633.5	629.5
	1.068	636	633	629
	1.069	636	633	629.5
	1.07	636	631.5	631
	1.071	637	629.5	629
	1.072	634.5	631.5	634.5
	1.073	639.5	630	629.5
	1.074	639.5	629.5	634
	1.075	634	627	633.5
	1.076	637.5	630	630
	1.077	637.5	628.5	635
	1.078	639.5	629.5	635.5
	1.079	636.5	624.5	631.5
	1.08	640	627	635.5
	1.081	643	626.5	634
	1.082	636	624	636
	1.083	639.5	627	633
	1.084	638	625.5	634
	1.085	640	623	636
	1.086	643	628.5	636
	1.087	641	623	640
	1.088	642.5	625.5	636.5
	1.089	640	623.5	635.5
	1.09	638	622.5	637
	1.091	641	626	636.5
	1.092	639	622	639.5
	1.093	638	621.5	639.5
	1.094	641	622	640
	1.095	637	622	641
	1.096	640	622	637.5
	1.097	642	624	641
	1.098	642.5	622	636
	1.099	639.5	624	636
	1.1	640	622	637.5
	1.101	637	623	639
	1.102	638.5	618	637
	1.103	640.5	622.5	635.5
	1.104	640.5	624	637
	1.105	638	627	638.5
	1.106	640	622.5	636
	1.107	640.5	624.5	634
	1.108	639.5	622	639.5
	1.109	637.5	622	638.5
	1.11	638.5	622.5	637
	1.111	638.5	625.5	636.5
	1.112	638.5	627	635.5
	1.113	639	625	635
	1.114	639.5	627	633
	1.115	639.5	625.5	634
	1.116	638	627	632.5
	1.117	637	627	636
	1.118	640	629.5	631.5
	1.119	638	628.5	634
	1.12	642	630.5	631.5
	1.121	638	632	633.5
	1.122	639.5	629	639.5
	1.123	642	630	634
	1.124	640	630	634
	1.125	640.5	630.5	631.5
	1.126	640.5	634	634.5
	1.127	638	635	634
	1.128	640	633.5	631
	1.129	642	637	632
	1.13	641.5	636	637.5
	1.131	643	638	631
	1.132	641.5	639	633.5
	1.133	639.5	639	635
	1.134	641	636.5	631.5
	1.135	641	640.5	636
	1.136	641	638.5	633.5
	1.137	643	636	634
	1.138	642.5	638.5	631
	1.139	643.5	637.5	629
	1.14	641.5	636.5	632.5
	1.141	638.5	637	632
	1.142	642	637.5	630
	1.143	643	635.5	629.5
	1.144	642.5	633.5	636
	1.145	642	636	636
	1.146	645	633	633.5
	1.147	642	633	633.5
	1.148	643	635.5	633.5
	1.149	639.5	629.5	629
	1.15	642	629	631.5
	1.151	645.5	630.5	629
	1.152	642	629	630.5
	1.153	644	623.5	629
	1.154	642	623	627
	1.155	643	622	629
	1.156	642	622.5	629.5
	1.157	642.5	619.5	630.5
	1.158	640.5	621	629
	1.159	641	616.5	627
	1.16	642	616.5	629
	1.161	643	612	627
	1.162	643.5	612	627
	1.163	641.5	611	628.5
	1.164	642	606.5	630.5
	1.165	643.5	608	624.5
	1.166	643	607.5	625.5
	1.167	643	604	629
	1.168	642.5	600.5	627
	1.169	640.5	598	628.5
	1.17	643	596	625.5
	1.171	640	594.5	623.5
	1.172	640	589	623.5
	1.173	641.5	582	626
	1.174	640	582	626.5
	1.175	646.5	578.5	627
	1.176	639	581.5	624.5
	1.177	641	574.5	623
	1.178	640.5	571	622.5
	1.179	640	569	622
	1.18	642	566.5	624
	1.181	639.5	561.5	621
	1.182	641.5	563	622
	1.183	639.5	556	624
	1.184	642	557.5	622.5
	1.185	637	551	622
	1.186	645.5	547	620.5
	1.187	638	543	621
	1.188	640	537.5	622
	1.189	642	533.5	622
	1.19	640	533.5	622
	1.191	639	525.5	625
	1.192	639.5	522.5	622
	1.193	641.5	518	624
	1.194	640	514.5	621
	1.195	641	509	624
	1.196	639	504	623
	1.197	640	503.5	621
	1.198	640	492.5	624
	1.199	637.5	491	623.5
	1.2	641.5	487	622
	1.201	641	479.5	623
	1.202	641	478.5	624.5
	1.203	641.5	471.5	622
	1.204	639.5	468	620.5
	1.205	644	461.5	623.5
	1.206	640	453.5	621
	1.207	643	451	624
	1.208	643	445.5	621.5
	1.209	644.5	439.5	621.5
	1.21	643	431.5	621.5
	1.211	641	429	623.5
	1.212	641	420	621.5
	1.213	641	416	620
	1.214	642	410	622
	1.215	643	409	621
	1.216	646	401	622.5
	1.217	642	396.5	621.5
	1.218	641	388.5	622.5
	1.219	643	384	623
	1.22	647.5	381.5	622
	1.221	644	373.5	622.5
	1.222	646	370.5	623
	1.223	645.5	367.5	621.5
	1.224	643	363	625
	1.225	645.5	356	625.5
	1.226	647.5	356	625
	1.227	649.5	349.5	627
	1.228	644	344.5	625.5
	1.229	648	339.5	622
	1.23	648	339	624
	1.231	648.5	333	626
	1.232	647	328	625.5
	1.233	644	329	627
	1.234	647.5	324	627
	1.235	648.5	321	629
	1.236	648.5	317.5	623
	1.237	650.5	316.5	624.5
	1.238	650	311	626.5
	1.239	647	308	629
	1.24	650	306	629
	1.241	651	302	627
	1.242	651	299	628
	1.243	648.5	296	626
	1.244	652	294	627
	1.245	650.5	292	625
	1.246	649.5	291.5	623.5
	1.247	649	286	624
	1.248	649.5	284	623.5
	1.249	652	282.5	625
	1.25	649	285.5	624.5
	1.251	651	280.5	627
	1.252	651	280	624.5
	1.253	647.5	273.5	624
	1.254	650	273.5	621.5
	1.255	653	266.5	625.5
	1.256	650	269	622
	1.257	650	267.5	623
	1.258	649.5	267.5	625.5
	1.259	648.5	265.5	625
	1.26	647.5	259	626
	1.261	648	260	627
	1.262	648.5	258	623
	1.263	649	256	622.5
	1.264	650.5	249	627
	1.265	648.5	253	624.5
	1.266	646	246	627
	1.267	645	245	623.5
	1.268	647	243.5	623
	1.269	648.5	240.5	626
	1.27	647	233.5	623.5
	1.271	647	233	624
	1.272	646.5	230	623.5
	1.273	644	229.5	624.5
	1.274	649	227	624
	1.275	646.5	220.5	621.5
	1.276	644	220	625
	1.277	646.5	218	624.5
	1.278	648	210.5	624.5
	1.279	644.5	208	627
	1.28	643.5	206.5	627
	1.281	647.5	198	622
	1.282	643	197	624
	1.283	643.5	193.5	626.5
	1.284	642.5	191.5	627
	1.285	643	186	627
	1.286	644	183	627
	1.287	639.5	183.5	623.5
	1.288	640	177.5	625
	1.289	638.5	175.5	625
	1.29	639	170.5	625.5
	1.291	641	168.5	627
	1.292	640	160	625
	1.293	634	159.5	627
	1.294	636	157.5	629.5
	1.295	634	148.5	627
	1.296	634.5	152.5	627
	1.297	636	146	627
	1.298	634.5	144.5	630
	1.299	635	140.5	627
	1.3	633.5	141.5	632.5
	1.301	630.5	140	627
	1.302	632.5	134.5	627
	1.303	632.5	133	624.5
	1.304	633.5	129.5	629
	1.305	631	127.5	624.5
	1.306	630	125.5	632.5
	1.307	630	125.5	629.5
	1.308	631.5	123.5	628.5
	1.309	626	120.5	630.5
	1.31	629	119.5	630
	1.311	624	119.5	631.5
	1.312	624	115	632.5
	1.313	624	115.5	631
	1.314	623.5	116	632
	1.315	622	114.5	631
	1.316	621	115.5	626.5
	1.317	616	115.5	625.5
	1.318	620	114	629.5
	1.319	618	116	631
	1.32	619	115	629.5
	1.321	616.5	117.5	629.5
	1.322	616.5	116	630
	1.323	612	117	628.5
	1.324	612	116	627
	1.325	610	121.5	628.5
	1.326	611	123.5	630
	1.327	611.5	123.5	629.5
	1.328	606	129.5	630
	1.329	603.5	123.5	627
	1.33	607	132	630
	1.331	605.5	136.5	631.5
	1.332	608	134.5	629
	1.333	601.5	137.5	630
	1.334	601	147	632
	1.335	599	145.5	633
	1.336	599	155	632.5
	1.337	595.5	158.5	632
	1.338	597	161.5	630.5
	1.339	594.5	166	632.5
	1.34	590	170.5	630
	1.341	595	175	630.5
	1.342	589	180	632.5
	1.343	587	181.5	629.5
	1.344	588.5	186.5	631
	1.345	590	193	630
	1.346	588	195.5	633
	1.347	585	202	633
	1.348	588	205.5	635
	1.349	585	209	633
	1.35	581.5	212	632
	1.351	581	217.5	633
	1.352	577	221	632
	1.353	578.5	224.5	631.5
	1.354	576.5	230	632.5
	1.355	575.5	232.5	631.5
	1.356	577.5	239	636.5
	1.357	575	237.5	632.5
	1.358	571	240	634.5
	1.359	574.5	244.5	632
	1.36	572	246	637.5
	1.361	571.5	249	636.5
	1.362	573	249.5	634.5
	1.363	567.5	256	633
	1.364	568	256.5	635
	1.365	568.5	260.5	633
	1.366	567.5	264	636
	1.367	567.5	264	634.5
	1.368	560.5	264	630.5
	1.369	562.5	268.5	633
	1.37	562	268.5	634
	1.371	557.5	272	636
	1.372	559	277	638
	1.373	559	279	632.5
	1.374	555.5	276.5	636
	1.375	557	282.5	634.5
	1.376	554	283.5	635.5
	1.377	550.5	287	636
	1.378	551	289	638
	1.379	548	294.5	638
	1.38	545.5	292.5	632
	1.381	544	302.5	634.5
	1.382	541	308.5	638.5
	1.383	542.5	308	637
	1.384	539.5	315	642
	1.385	538.5	315.5	637
	1.386	534	321.5	636
	1.387	530.5	322.5	636.5
	1.388	530.5	330	637.5
	1.389	528	335.5	638
	1.39	526.5	342	640
	1.391	522.5	345.5	634
	1.392	516.5	347.5	638.5
	1.393	517	353	638
	1.394	515	360	636.5
	1.395	509	363.5	638.5
	1.396	511.5	369	636.5
	1.397	503.5	379	637
	1.398	503.5	382	633.5
	1.399	499	390	636.5
	1.4	499	396	633
	1.401	497	399.5	634.5
	1.402	491	404	634.5
	1.403	489.5	412.5	636.5
	1.404	486.5	417.5	639
	1.405	481.5	421.5	636.5
	1.406	477.5	428.5	634.5
	1.407	475.5	433	634.5
	1.408	469.5	442.5	630.5
	1.409	465.5	443.5	633
	1.41	463	451.5	633
	1.411	460.5	458	633.5
	1.412	456	463	629.5
	1.413	454	467.5	629.5
	1.414	449	475.5	633
	1.415	449	480	632.5
	1.416	444.5	488.5	633.5
	1.417	437.5	492.5	633
	1.418	433	499	631
	1.419	431.5	508	628.5
	1.42	430	512.5	630.5
	1.421	424	525.5	629
	1.422	419.5	527	630.5
	1.423	416	535	628.5
	1.424	416.5	540.5	627
	1.425	409.5	551.5	625
	1.426	408.5	559	627
	1.427	404	563.5	629
	1.428	401.5	572.5	629.5
	1.429	400	582	625
	1.43	394	589.5	628
	1.431	388	598	627
	1.432	387.5	605.5	626.5
	1.433	385.5	615.5	630
	1.434	380.5	623.5	624
	1.435	372.5	635	629
	1.436	376	640.5	627
	1.437	372	650.5	626
	1.438	366	662	627
	1.439	362	670	630
	1.44	360	677	629
	1.441	355.5	685	627
	1.442	347	695	626.5
	1.443	344.5	704.5	628.5
	1.444	340	711	627
	1.445	336	719.5	626.5
	1.446	335	727	626.5
	1.447	330	737.5	629
	1.448	328	744.5	627
	1.449	324	752	625.5
	1.45	318	755.5	629
	1.451	314	766.5	626.5
	1.452	309.5	776	625
	1.453	304.5	783	627
	1.454	297	791	626.5
	1.455	294.5	801	624.5
	1.456	290.5	808.5	622
	1.457	285	819.5	621.5
	1.458	280	827.5	626
	1.459	273.5	839.5	624
	1.46	271	847	624.5
	1.461	263.5	859	622
	1.462	263	873	624.5
	1.463	258	880.5	622
	1.464	249.5	887	625
	1.465	246	899	626
	1.466	239	905	625
	1.467	231	916.5	626
	1.468	227	925	624.5
	1.469	222.5	934.5	623
	1.47	220.5	940	627
	1.471	216.5	947	624
	1.472	205	955	625.5
	1.473	203	961.5	629
	1.474	200.5	968.5	629
	1.475	196.5	970	629
	1.476	191	979	626.5
	1.477	187	984	629.5
	1.478	180.5	987.5	630
	1.479	177.5	995	631
	1.48	171.5	999.5	627
	1.481	167	1006.5	631
	1.482	167	1007	631.5
	1.483	158	1014	629
	1.484	155	1020.5	631
	1.485	151.5	1022	632.5
	1.486	150	1026	630
	1.487	145	1026	633
	1.488	139.5	1029.5	634
	1.489	139.5	1029	635.5
	1.49	140	1034.5	636
	1.491	134	1035	636
	1.492	126.5	1035.5	638
	1.493	126	1037	637
	1.494	123	1042	642
	1.495	120.5	1044	638
	1.496	119	1043	641.5
	1.497	115.5	1044.5	642
	1.498	111.5	1044.5	642
	1.499	104.5	1046.5	645.5
	1.5	108.5	1047.5	643.5
	1.501	110	1053	646
	1.502	104	1053.5	650
	1.503	101	1054.5	647.5
	1.504	101	1056.5	647
	1.505	101	1059.5	645.5
	1.506	96.5	1059.5	647.5
	1.507	96.5	1064.5	649
	1.508	94.5	1068	649.5
	1.509	90	1072	648
	1.51	91.5	1073.5	652.5
	1.511	91.5	1076	649.5
	1.512	87	1082	654.5
	1.513	86	1087.5	651.5
	1.514	84	1087.5	651
	1.515	82	1089	656.5
	1.516	85	1095.5	656.5
	1.517	84	1102.5	656.5
	1.518	80.5	1103.5	651.5
	1.519	81	1108	653
	1.52	83.5	1113	654.5
	1.521	78	1116	655
	1.522	81	1120.5	654
	1.523	82.5	1122.5	652.5
	1.524	82	1127.5	654
	1.525	76.5	1131.5	656.5
	1.526	78.5	1131	655
	1.527	79	1136	656.5
	1.528	78.5	1143	655
	1.529	80	1147.5	655.5
	1.53	80	1149	654
	1.531	77	1149	653
	1.532	75.5	1149	655
	1.533	76.5	1155	655.5
	1.534	79	1158.5	651.5
	1.535	82	1154.5	654
	1.536	81	1159.5	653
	1.537	78.5	1159	655.5
	1.538	84.5	1159	656
	1.539	83	1163.5	658
	1.54	82.5	1165	650.5
	1.541	82	1163.5	650.5
	1.542	83	1163.5	651
	1.543	83.5	1163.5	652
	1.544	84	1168.5	655
	1.545	86.5	1169	649.5
	1.546	87.5	1167.5	650
	1.547	87.5	1167.5	650
	1.548	90	1170	649
	1.549	92	1174.5	646.5
	1.55	94.5	1172.5	651.5
	1.551	95	1173.5	645
	1.552	98.5	1176.5	645
	1.553	96.5	1178	646.5
	1.554	105.5	1181.5	645.5
	1.555	106	1182.5	649
	1.556	104.5	1181.5	645.5
	1.557	112.5	1186	644
	1.558	112.5	1187.5	642
	1.559	116.5	1188.5	642
	1.56	123	1186.5	642
	1.561	126	1191	643.5
	1.562	133	1191.5	640
	1.563	135	1192.5	637.5
	1.564	140	1193.5	637
	1.565	149.5	1195.5	639
	1.566	150	1193.5	638.5
	1.567	155.5	1199.5	638
	1.568	161	1200.5	636.5
	1.569	164.5	1203	635.5
	1.57	172	1204	634.5
	1.571	176.5	1205.5	634
	1.572	180.5	1208	636
	1.573	184	1208.5	629
	1.574	194.5	1207	634
	1.575	197.5	1208.5	631.5
	1.576	204.5	1208.5	629
	1.577	212.5	1216	629.5
	1.578	214.5	1208.5	629.5
	1.579	218	1217.5	627
	1.58	224.5	1220.5	627
	1.581	232	1217.5	624
	1.582	236.5	1223.5	624
	1.583	237.5	1225.5	627
	1.584	240	1227	622
	1.585	246	1229.5	624
	1.586	246.5	1229	624
	1.587	251	1233.5	621
	1.588	255.5	1238	619
	1.589	255.5	1240	616.5
	1.59	256.5	1244	617.5
	1.591	261.5	1246.5	615.5
	1.592	267	1246	618.5
	1.593	269.5	1247	612
	1.594	271.5	1249.5	615.5
	1.595	270.5	1248.5	616
	1.596	274	1252	614.5
	1.597	280.5	1252.5	612
	1.598	283	1257.5	612
	1.599	286	1259.5	610.5
	1.6	289	1256	611.5
	1.601	290	1262	612
	1.602	295	1260	609.5
	1.603	300	1266.5	607
	1.604	303.5	1264.5	605.5
	1.605	303.5	1263.5	608.5
	1.606	309.5	1263.5	607
	1.607	311	1267.5	606.5
	1.608	315	1266	604.5
	1.609	320	1267	603
	1.61	321.5	1268	600.5
	1.611	323.5	1268	603.5
	1.612	328.5	1266.5	604.5
	1.613	335.5	1266.5	602.5
	1.614	340.5	1268	602.5
	1.615	342	1268	600.5
	1.616	348	1268	601
	1.617	352.5	1267	602.5
	1.618	357.5	1266.5	599.5
	1.619	359.5	1265.5	599
	1.62	365	1267.5	596.5
	1.621	369.5	1268	599
	1.622	372	1266	599.5
	1.623	378.5	1265.5	600
	1.624	385	1265	598
	1.625	390	1263	596
	1.626	391	1263.5	598
	1.627	401	1261.5	595.5
	1.628	401.5	1259	597
	1.629	410	1258.5	596
	1.63	414	1256.5	596
	1.631	416.5	1256	595
	1.632	424	1257.5	597
	1.633	431	1253	599
	1.634	434.5	1257	595.5
	1.635	440.5	1251.5	595.5
	1.636	445.5	1249.5	591.5
	1.637	454.5	1245	594
	1.638	462	1248	594.5
	1.639	467	1246.5	595.5
	1.64	472.5	1244.5	597
	1.641	477.5	1248	597
	1.642	486	1241	594.5
	1.643	489	1238	592.5
	1.644	498.5	1242	593.5
	1.645	508.5	1236.5	592.5
	1.646	513	1233	595
	1.647	520	1234.5	592.5
	1.648	528	1229	589
	1.649	540	1228	591
	1.65	547	1225.5	594.5
	1.651	557.5	1221	594.5
	1.652	565.5	1218	593
	1.653	572	1208.5	597
	1.654	582	1213.5	595
	1.655	594	1208.5	595.5
	1.656	600.5	1205.5	595
	1.657	615	1205	593
	1.658	629.5	1198.5	592.5
	1.659	638	1196	592.5
	1.66	651.5	1193	594
	1.661	663.5	1191	593
	1.662	680.5	1189	593
	1.663	691.5	1182.5	588
	1.664	708.5	1182	589.5
	1.665	724	1175.5	588.5
	1.666	743.5	1176	589
	1.667	755.5	1172.5	588
	1.668	770.5	1165.5	587
	1.669	791	1161.5	587
	1.67	806	1161.5	582
	1.671	826.5	1154.5	584.5
	1.672	841	1157.5	582
	1.673	858	1153.5	580.5
	1.674	874	1149	578
	1.675	894.5	1149	581
	1.676	909.5	1142	581.5
	1.677	927	1143	578
	1.678	945.5	1141.5	573
	1.679	962.5	1136.5	578
	1.68	981	1132.5	572
	1.681	998.5	1129	575.5
	1.682	1014.5	1126	571
	1.683	1035.5	1123.5	572
	1.684	1049.5	1121	569
	1.685	1059.5	1120.5	565.5
	1.686	1084.5	1117	565
	1.687	1099.5	1116	563
	1.688	1113.5	1112	560.5
	1.689	1131.5	1111	562.5
	1.69	1141.5	1108	554.5
	1.691	1153.5	1108	555.5
	1.692	1169.5	1102.5	558.5
	1.693	1178.5	1105.5	552.5
	1.694	1189.5	1104	550
	1.695	1204	1099	546.5
	1.696	1208.5	1101.5	547.5
	1.697	1218.5	1097	541.5
	1.698	1227	1101	539.5
	1.699	1235	1096.5	537.5
	1.7	1243	1096.5	534
	1.701	1247.5	1096.5	533
	1.702	1253	1094.5	526.5
	1.703	1253	1094	526.5
	1.704	1262.5	1094.5	522
	1.705	1266.5	1093	518
	1.706	1268	1097.5	513.5
	1.707	1273	1095.5	513
	1.708	1277.5	1098.5	506.5
	1.709	1279	1095.5	504
	1.71	1283	1102	499.5
	1.711	1286.5	1102	497
	1.712	1285	1101	491.5
	1.713	1294	1100.5	485
	1.714	1295	1104	480
	1.715	1298	1104	474.5
	1.716	1303	1107	475.5
	1.717	1306.5	1108	466.5
	1.718	1311.5	1112	464.5
	1.719	1316	1117	459
	1.72	1325.5	1116	455.5
	1.721	1327	1118.5	448
	1.722	1327.5	1123	448.5
	1.723	1336	1126.5	439.5
	1.724	1340	1129.5	432
	1.725	1349.5	1133.5	428
	1.726	1355	1142	424.5
	1.727	1363.5	1145	413.5
	1.728	1367	1149	412
	1.729	1372.5	1154.5	405
	1.73	1381	1158.5	403.5
	1.731	1382	1165	396
	1.732	1393	1173	392
	1.733	1396.5	1178.5	389.5
	1.734	1404.5	1183.5	381
	1.735	1408	1189.5	377
	1.736	1415	1197	373.5
	1.737	1421	1202.5	367
	1.738	1429	1208.5	363
	1.739	1432	1214.5	357
	1.74	1438.5	1223.5	354
	1.741	1443	1229.5	347.5
	1.742	1447	1235	347
	1.743	1453	1238	341
	1.744	1456	1248.5	335
	1.745	1464.5	1253	328.5
	1.746	1471	1260	321.5
	1.747	1473	1268	320
	1.748	1480	1275.5	313
	1.749	1484	1280.5	313
	1.75	1487	1287.5	307.5
	1.751	1486.5	1293	299
	1.752	1488.5	1297.5	301
	1.753	1494	1298	295
	1.754	1491.5	1310.5	294
	1.755	1500.5	1318.5	286.5
	1.756	1500.5	1323.5	282.5
	1.757	1505.5	1327.5	276.5
	1.758	1504	1335	274
	1.759	1503	1339.5	273.5
	1.76	1506.5	1345.5	271
	1.761	1504	1350	265
	1.762	1503.5	1359.5	261.5
	1.763	1505	1363.5	260
	1.764	1496	1366	258
	1.765	1501.5	1372	257
	1.766	1498	1377	251
	1.767	1500	1383	249.5
	1.768	1498.5	1384	247
	1.769	1497	1387.5	242
	1.77	1496	1395	238.5
	1.771	1497.5	1398.5	237.5
	1.772	1497	1402	234
	1.773	1496	1402	229.5
	1.774	1489.5	1407.5	233
	1.775	1491.5	1413.5	227.5
	1.776	1490	1416.5	225.5
	1.777	1489.5	1417	224.5
	1.778	1491.5	1424	219
	1.779	1487	1427	219.5
	1.78	1488.5	1429	217
	1.781	1488	1430	212
	1.782	1485.5	1438	214
	1.783	1484	1438.5	212
	1.784	1485.5	1443.5	209
	1.785	1484	1444.5	206
	1.786	1484	1446	205
	1.787	1482.5	1447	205
	1.788	1484	1447	206.5
	1.789	1479.5	1447	204.5
	1.79	1484	1456.5	201
	1.791	1481.5	1457	201.5
	1.792	1480.5	1457.5	201
	1.793	1483	1460	193.5
	1.794	1483.5	1462	198
	1.795	1484	1465.5	194.5
	1.796	1480.5	1464.5	192.5
	1.797	1480	1467	194.5
	1.798	1481.5	1469.5	190
	1.799	1484	1472	191.5
	1.8	1482.5	1473	189
	1.801	1479.5	1471.5	191.5
	1.802	1481	1471.5	188.5
	1.803	1480.5	1469.5	189.5
	1.804	1479	1469.5	188.5
	1.805	1480	1468.5	188
	1.806	1479.5	1468	190
	1.807	1475.5	1462	185
	1.808	1473	1462	184.5
	1.809	1470.5	1461.5	187
	1.81	1467.5	1462	186
	1.811	1467	1454.5	185
	1.812	1462	1458	185.5
	1.813	1460.5	1456	185
	1.814	1458	1447	183
	1.815	1456	1447	188
	1.816	1447	1445.5	187
	1.817	1447	1441	187
	1.818	1442.5	1435	187
	1.819	1441.5	1429.5	184.5
	1.82	1437	1422.5	189
	1.821	1432	1413.5	188
	1.822	1430.5	1408.5	188
	1.823	1429	1399	191
	1.824	1423	1387.5	189.5
	1.825	1417	1381	191
	1.826	1413.5	1372.5	192.5
	1.827	1414.5	1364	190.5
	1.828	1411.5	1357	193.5
	1.829	1408	1342.5	196.5
	1.83	1402	1327.5	192
	1.831	1398	1319	198
	1.832	1395	1305	201.5
	1.833	1387.5	1293	198
	1.834	1387.5	1279	202.5
	1.835	1382.5	1264	208
	1.836	1378.5	1247.5	206
	1.837	1372.5	1232.5	207
	1.838	1369.5	1213.5	207
	1.839	1365	1196.5	211.5
	1.84	1362	1178.5	212.5
	1.841	1357	1161	215
	1.842	1353	1139.5	217
	1.843	1346	1120.5	219.5
	1.844	1347.5	1097.5	220.5
	1.845	1341	1077	224.5
	1.846	1337.5	1056.5	226.5
	1.847	1327.5	1029.5	227.5
	1.848	1327.5	1009	230.5
	1.849	1326.5	983	234.5
	1.85	1321	955	236.5
	1.851	1315.5	936	236
	1.852	1315.5	908	243
	1.853	1309.5	881.5	245
	1.854	1298	850.5	249.5
	1.855	1298	827.5	247
	1.856	1293	795.5	252
	1.857	1289	767.5	257.5
	1.858	1282	738	254
	1.859	1276.5	710.5	257.5
	1.86	1274	680	258
	1.861	1263.5	649.5	263.5
	1.862	1262.5	618.5	263.5
	1.863	1257	585	267.5
	1.864	1250	552.5	266
	1.865	1244.5	523	269.5
	1.866	1242.5	488.5	270.5
	1.867	1234.5	457.5	273.5
	1.868	1231	423.5	273.5
	1.869	1223.5	391.5	274.5
	1.87	1219.5	361.5	277.5
	1.871	1208.5	332	280
	1.872	1208.5	299.5	279
	1.873	1203.5	269	279
	1.874	1202	241.5	280.5
	1.875	1199.5	213	281.5
	1.876	1191.5	188.5	279.5
	1.877	1188.5	159	283.5
	1.878	1178.5	134.5	284
	1.879	1183	111	290
	1.88	1176.5	92	286
	1.881	1172.5	76	285
	1.882	1169.5	61.5	289
	1.883	1163.5	47.5	291.5
	1.884	1162.5	35	295
	1.885	1162	23.5	293
	1.886	1157	14	293.5
	1.887	1155	9	297.5
	1.888	1149	5.5	296.5
	1.889	1146	-1.5	301.5
	1.89	1143	-4	301
	1.891	1140.5	-8.5	302
	1.892	1140.5	-10	301.5
	1.893	1138.5	-7	303
	1.894	1134	-11	306
	1.895	1132.5	-11	309
	1.896	1131.5	-14	313
	1.897	1128.5	-10.5	309
	1.898	1126.5	-10	313.5
	1.899	1124.5	-5.5	320
	1.9	1124	-3.5	321.5
	1.901	1121.5	-3	324.5
	1.902	1121.5	-1.5	327
	1.903	1120.5	-2.5	329
	1.904	1120.5	-2	331
	1.905	1119	-2	334
	1.906	1117	-3	340
	1.907	1114.5	-3.5	341
	1.908	1115	-3	345.5
	1.909	1117	-3.5	349
	1.91	1116	-1.5	353.5
	1.911	1119	-8	353
	1.912	1119	-5	358
	1.913	1119	-5.5	362.5
	1.914	1118	-6	367.5
	1.915	1126	-7	372
	1.916	1122.5	-8	377
	1.917	1129.5	-4	380.5
	1.918	1130	-7.5	388.5
	1.919	1133.5	-3.5	392
	1.92	1137.5	-2.5	395.5
	1.921	1140	-4	397.5
	1.922	1148.5	-5.5	402.5
	1.923	1149	-6	410
	1.924	1158	-2.5	410
	1.925	1161.5	-3	420.5
	1.926	1168.5	-2	420.5
	1.927	1167.5	-5	426
	1.928	1171.5	-2.5	432.5
	1.929	1178.5	-6.5	441
	1.93	1178.5	1	442.5
	1.931	1189	-4.5	453
	1.932	1192.5	-3.5	459
	1.933	1199	-4.5	464.5
	1.934	1204	-1	472.5
	1.935	1214.5	-4	480
	1.936	1222.5	-4.5	490
	1.937	1228.5	-3.5	499
	1.938	1232.5	-3.5	505.5
	1.939	1245.5	-3.5	518.5
	1.94	1251.5	-2.5	526.5
	1.941	1260	-2	535.5
	1.942	1265	-2.5	545
	1.943	1273.5	-1.5	556.5
	1.944	1280	-3.5	567.5
	1.945	1286.5	-2.5	582
	1.946	1295	-3	589.5
	1.947	1298	-1	603
	1.948	1305.5	-6.5	612
	1.949	1313	-4.5	624
	1.95	1313	-4	636
	1.951	1321	-5.5	649
	1.952	1327.5	-3	660.5
	1.953	1327.5	-4.5	671.5
	1.954	1337.5	-5	681
	1.955	1342	-2.5	695.5
	1.956	1342.5	-5.5	708
	1.957	1342.5	-2.5	718.5
	1.958	1351	-3.5	729.5
	1.959	1356	-6	744
	1.96	1357.5	-5	753
	1.961	1360	-7.5	763.5
	1.962	1359.5	-7	773.5
	1.963	1368	-0.5	781
	1.964	1367	-5	794.5
	1.965	1369.5	-6.5	805
	1.966	1370	-2.5	813.5
	1.967	1372.5	-3.5	819
	1.968	1371.5	-5	827.5
	1.969	1376.5	-2.5	837
	1.97	1381.5	-3	846.5
	1.971	1381	-3.5	850.5
	1.972	1384	-2	858
	1.973	1387.5	-3	863.5
	1.974	1393	0	865.5
	1.975	1398.5	-5.5	869
	1.976	1400	-3	876.5
	1.977	1402	-4	880.5
	1.978	1405.5	-2.5	885.5
	1.979	1410	-3	885.5
	1.98	1409.5	-5	888.5
	1.981	1414.5	-3	889
	1.982	1416	-1	891.5
	1.983	1416.5	-3	893
	1.984	1417	-2.5	893
	1.985	1422.5	-2	895.5
	1.986	1426	-3	895.5
	1.987	1427.5	-4.5	895.5
	1.988	1427	-4	901
	1.989	1428	-4	903.5
	1.99	1423	-2	903
	1.991	1431.5	-6	908
	1.992	1427	-3	909
	1.993	1428	-2	910
[truncated: 6,006 more rows]

## Sheet: E
DataTypeVer2.0	Time	Fz	Fz	Fz
NumberOfData		15000	15000	15000
PreTriggerData		0	0	0
SamplingTime[ms]		1	1	1
DataLabel		AG1:CMJ	AG2:CMJ	AG3:CMJ
DataUnit	sec	N	N	N
	0	697	685.5	692
	0.001	695	690.5	690.5
	0.002	693	691	691.5
	0.003	696	690.5	693
	0.004	694	689	693
	0.005	694	690.5	693
	0.006	697.5	692	692
	0.007	693	690.5	692.5
	0.008	696.5	688.5	693
	0.009	697	693	691
	0.01	695	689.5	692
	0.011	694.5	691	696.5
	0.012	693	694.5	695.5
	0.013	697	690.5	694.5
	0.014	695.5	688.5	696.5
	0.015	694.5	693	695
	0.016	698	691.5	693
	0.017	695.5	691	693
	0.018	695.5	687	695.5
	0.019	698.5	688.5	691
	0.02	696.5	693	692
	0.021	697	694.5	694
	0.022	700	690.5	692.5
	0.023	696	692	692
	0.024	695.5	691	697.5
	0.025	696	691.5	691
	0.026	697	690.5	693
	0.027	696.5	692	695
	0.028	697.5	689.5	694
	0.029	693	693	692
	0.03	697	689.5	692.5
	0.031	693	691	692
	0.032	698.5	692	695
	0.033	696.5	695	689
	0.034	696	692	693
	0.035	698	690.5	690.5
	0.036	692.5	691	689.5
	0.037	698	692.5	692.5
	0.038	694	690.5	692.5
	0.039	697.5	693	693
	0.04	693	691	691
	0.041	690.5	693	691
	0.042	691	689	690.5
	0.043	695	692	691
	0.044	689.5	690.5	690
	0.045	695.5	692	693
	0.046	690.5	692	689.5
	0.047	694.5	695	685.5
	0.048	693	688.5	686.5
	0.049	693	690.5	690
	0.05	692	688.5	688.5
	0.051	692	690.5	689
	0.052	690	692.5	685.5
	0.053	691.5	689.5	688
	0.054	694	695	683.5
	0.055	690.5	691	686.5
	0.056	693	691	688.5
	0.057	693	692	685.5
	0.058	688	695.5	684
	0.059	692.5	692.5	684
	0.06	690.5	689.5	681.5
	0.061	691	693	685
	0.062	691	691	682
	0.063	691	693	688.5
	0.064	688.5	693	684
	0.065	691.5	690.5	682.5
	0.066	690.5	693	684
	0.067	690	691.5	681.5
	0.068	691	691	682
	0.069	688.5	695	684
	0.07	690	692.5	681
	0.071	690.5	696.5	684.5
	0.072	687.5	693	682.5
	0.073	692	691.5	683.5
	0.074	693	697	682.5
	0.075	689.5	692.5	683.5
	0.076	691	697.5	684.5
	0.077	689	697.5	680.5
	0.078	693	696.5	683
	0.079	691.5	696	686.5
	0.08	693	697.5	685.5
	0.081	691.5	699.5	683
	0.082	692	696	686
	0.083	687	699.5	682.5
	0.084	691.5	697	683
	0.085	690	701.5	683.5
	0.086	692	697	682.5
	0.087	688	696.5	681
	0.088	689	693	683.5
	0.089	691	697	686.5
	0.09	692.5	697.5	684.5
	0.091	689.5	699.5	684
	0.092	687	699.5	684.5
	0.093	690.5	699	684
	0.094	689.5	696.5	686.5
	0.095	689	698.5	686.5
	0.096	692	698	688
	0.097	690.5	698	685.5
	0.098	692	697	686.5
	0.099	692.5	699.5	685
	0.1	689.5	696	686
	0.101	691	697	690
	0.102	690.5	699	690.5
	0.103	691	697.5	688
	0.104	693	695	690.5
	0.105	689.5	696.5	691
	0.106	690	694.5	688.5
	0.107	693	696.5	690.5
	0.108	687.5	694	690.5
	0.109	691.5	695.5	692
	0.11	692.5	695	690
	0.111	690.5	690.5	692
	0.112	693	697	693
	0.113	692	693	691
	0.114	690.5	694.5	690.5
	0.115	690	695	691
	0.116	691.5	688.5	693
	0.117	691	693	692
	0.118	692.5	695	688
	0.119	695	693	697
	0.12	691	694.5	691
	0.121	689.5	692	691.5
	0.122	693	692	694
	0.123	692	692	692
	0.124	691	691.5	695
	0.125	691	689.5	693
	0.126	691.5	691.5	698
	0.127	692	689	693
	0.128	693	692.5	692
	0.129	692	690	693
	0.13	692.5	688	693
	0.131	694.5	691	695
	0.132	690.5	693	694
	0.133	694.5	693	695
	0.134	691	691.5	694
	0.135	694	689	691.5
	0.136	694.5	689	692.5
	0.137	696	689	692
	0.138	694.5	690	692
	0.139	693	687	695
	0.14	693	691	691
	0.141	689.5	692.5	691
	0.142	691	688	691.5
	0.143	695.5	690	690.5
	0.144	692	687.5	693
	0.145	693	689.5	692.5
	0.146	697.5	689	690
	0.147	691	691	692
	0.148	693	689.5	694.5
	0.149	693	689.5	690
	0.15	695	688	694.5
	0.151	697	685	691
	0.152	695	691.5	690.5
	0.153	696	690.5	690.5
	0.154	694.5	687.5	692
	0.155	694.5	689	692.5
	0.156	695	695	693
	0.157	700	691	691.5
	0.158	697	685.5	693
	0.159	696.5	693	691
	0.16	693	691.5	691.5
	0.161	697.5	690.5	693
	0.162	694.5	689.5	690.5
	0.163	692	690.5	686.5
	0.164	696	688.5	691
	0.165	693	693	690
	0.166	696	696	689
	0.167	693	697	686.5
	0.168	697.5	688.5	689.5
	0.169	694.5	692.5	691
	0.17	697.5	691.5	691.5
	0.171	696.5	691	688.5
	0.172	697	691	688
	0.173	693	692	689.5
	0.174	692	692.5	691
	0.175	690.5	690.5	688.5
	0.176	691.5	694	688.5
	0.177	694.5	690.5	687.5
	0.178	691.5	692.5	691
	0.179	692	690.5	690.5
	0.18	692	694.5	687.5
	0.181	695	695	690.5
	0.182	692	692.5	690
	0.183	693	692.5	688
	0.184	693	695	690.5
	0.185	690	694.5	687.5
	0.186	692.5	692	693
	0.187	691	692	690
	0.188	690.5	692	686.5
	0.189	693	693	689.5
	0.19	693	694.5	692.5
	0.191	690.5	691.5	690.5
	0.192	685.5	696	689
	0.193	687.5	693	693
	0.194	690.5	693	691.5
	0.195	690.5	694.5	688
	0.196	691.5	692.5	691
	0.197	688.5	691	691
	0.198	687.5	694.5	689.5
	0.199	687	692	691
	0.2	688	694	690.5
	0.201	687	693.5	691.5
	0.202	687.5	694.5	692
	0.203	686	692.5	686.5
	0.204	684.5	690.5	690
	0.205	684	693	689
	0.206	683.5	696.5	693
	0.207	685	690.5	696
	0.208	685	693	691.5
	0.209	685	690.5	689.5
	0.21	684	688.5	693
	0.211	684	690.5	691.5
	0.212	685.5	692.5	692.5
	0.213	687	689.5	691.5
	0.214	684.5	690.5	690.5
	0.215	686	690.5	692
	0.216	684	690.5	692.5
	0.217	682	690.5	694.5
	0.218	686	692	693
	0.219	680.5	689	691
	0.22	683.5	690	695
	0.221	684	687	693
	0.222	682.5	687	694
	0.223	680.5	686	692.5
	0.224	685.5	687.5	694
	0.225	682.5	688.5	692.5
	0.226	682	685.5	690.5
	0.227	684	690.5	694
	0.228	684	687	692.5
	0.229	685.5	689.5	694
	0.23	684	687.5	695.5
	0.231	680.5	688.5	696
	0.232	685	687.5	694
	0.233	683	685.5	691.5
	0.234	685	687.5	695
	0.235	681.5	687.5	693
	0.236	683.5	684	694.5
	0.237	685	686	693
	0.238	686	685	693
	0.239	681.5	687.5	694
	0.24	683	686.5	696
	0.241	684.5	684.5	693.5
	0.242	681	686	695
	0.243	682	684.5	692.5
	0.244	686.5	685.5	690.5
	0.245	682	684	693
	0.246	684.5	683	693
	0.247	684.5	680.5	697
	0.248	681	684.5	690.5
	0.249	686	687.5	694.5
	0.25	684	686.5	691.5
	0.251	684	684	697
	0.252	683.5	684	693
	0.253	684.5	684.5	695.5
	0.254	682.5	684	692
	0.255	682	683	693
	0.256	686	687.5	693
	0.257	684.5	684	693
	0.258	683.5	682.5	690.5
	0.259	684	684	692
	0.26	684	688	692
	0.261	684	684	693
	0.262	684	685.5	694
	0.263	684	686	690.5
	0.264	684.5	686	690.5
	0.265	685.5	685	693
	0.266	684	685	692
	0.267	683	684	691
	0.268	684.5	686	691.5
	0.269	686	689	694
	0.27	689	687	690.5
	0.271	686	688.5	689.5
	0.272	685.5	687	689
	0.273	684.5	686	688.5
	0.274	687	687.5	688
	0.275	687	688	691
	0.276	687	689	688
	0.277	688	689	688
	0.278	688	688.5	691
	0.279	690.5	689	693
	0.28	687.5	688.5	687.5
	0.281	689.5	690.5	686.5
	0.282	690.5	689	693
	0.283	687	691.5	690
	0.284	691	691	690
	0.285	691	688	686.5
	0.286	687	689	690.5
	0.287	689	691.5	690.5
	0.288	691.5	693	688.5
	0.289	691	687.5	689.5
	0.29	690.5	689.5	690.5
	0.291	692	693	687
	0.292	693	692.5	689
	0.293	688	691	685
	0.294	689	692	687.5
	0.295	688.5	693.5	684.5
	0.296	690	693	690
	0.297	687.5	692.5	690
	0.298	690.5	695	688.5
	0.299	688	693	687
	0.3	689.5	694	689.5
	0.301	690	693	689
	0.302	690.5	692.5	687
	0.303	689.5	696	687
	0.304	690.5	695	687.5
	0.305	688	694	684.5
	0.306	686.5	692	686.5
	0.307	689.5	694.5	684.5
	0.308	686	693	684
	0.309	685	697	684.5
	0.31	687	698.5	687.5
	0.311	688.5	697.5	685.5
	0.312	689	698	688
	0.313	688.5	694.5	687.5
	0.314	686.5	698	688
	0.315	689.5	697.5	686.5
	0.316	690.5	696	689
	0.317	689	696	684.5
	0.318	688.5	695	684
	0.319	691	695	686
	0.32	692	695	687
	0.321	691	698	688
	0.322	690	697	687.5
	0.323	692	695	688.5
	0.324	688.5	695	687
	0.325	687.5	693	687.5
	0.326	684	697	688.5
	0.327	687.5	695	684.5
	0.328	687.5	696.5	690
	0.329	691	693	690.5
	0.33	688.5	695	688.5
	0.331	686	694.5	688
	0.332	693	695.5	689
	0.333	688	696	685
	0.334	688	695.5	689
	0.335	689.5	695	683
	0.336	690.5	693	691.5
	0.337	690.5	693	688.5
	0.338	688	693	687.5
	0.339	689.5	690	689.5
	0.34	688.5	692.5	690
	0.341	686.5	694.5	691
	0.342	689.5	692.5	687
	0.343	689.5	693	687.5
	0.344	692.5	692.5	689.5
	0.345	691	690.5	689.5
	0.346	689.5	694.5	691
	0.347	690	689	689.5
	0.348	691.5	690.5	686
	0.349	691.5	689	688.5
	0.35	691	690	687.5
	0.351	690.5	692.5	690.5
	0.352	690.5	692.5	695.5
	0.353	690	690.5	690
	0.354	688.5	691	690
	0.355	692.5	692	687.5
	0.356	691	690.5	687
	0.357	691.5	691.5	690
	0.358	691	693	691.5
	0.359	690.5	694.5	691
	0.36	691	688.5	692.5
	0.361	692.5	686.5	688.5
	0.362	692.5	691	687.5
	0.363	690.5	687.5	691.5
	0.364	688.5	692.5	693
	0.365	693	689.5	690
	0.366	690	691	688.5
	0.367	689.5	690.5	691.5
	0.368	695	690.5	691
	0.369	689.5	689.5	692
	0.37	690.5	689.5	690.5
	0.371	690.5	689	690.5
	0.372	695	689	693
	0.373	690	689	690
	0.374	693	686.5	690.5
	0.375	690.5	685.5	691
	0.376	691.5	690	690
	0.377	687.5	689.5	693
	0.378	689	687.5	688.5
	0.379	689	687.5	692
	0.38	689.5	690	695.5
	0.381	690.5	689.5	692.5
	0.382	692	689	692.5
	0.383	688	688.5	690
	0.384	689.5	687.5	689
	0.385	690.5	686.5	691.5
	0.386	689.5	689.5	690.5
	0.387	692	690.5	690.5
	0.388	688	685.5	691
	0.389	689	687.5	691.5
	0.39	688.5	691	688.5
	0.391	690.5	686	691.5
	0.392	691	687	689.5
	0.393	685.5	687	690.5
	0.394	687	686	690.5
	0.395	688.5	687.5	690.5
	0.396	691.5	690	692
	0.397	685.5	688	690.5
	0.398	691	687.5	689.5
	0.399	688	685.5	689
	0.4	690	689.5	690.5
	0.401	690	688	689.5
	0.402	692	690.5	690.5
	0.403	686.5	688.5	691
	0.404	691	687.5	693
	0.405	690.5	691	688.5
	0.406	689.5	689	691
	0.407	689	683.5	690.5
	0.408	692.5	687.5	690
	0.409	690	689	689
	0.41	689.5	688	690.5
	0.411	691.5	688.5	691.5
	0.412	692	689	687.5
	0.413	690.5	687.5	693
	0.414	691	688.5	687.5
	0.415	689.5	691.5	687.5
	0.416	694.5	689.5	684.5
	0.417	688.5	686.5	690
	0.418	688	685.5	689
	0.419	690.5	687.5	686.5
	0.42	689.5	687	686.5
	0.421	694.5	687.5	687
	0.422	695.5	690.5	689
	0.423	691.5	687.5	691
	0.424	692	688.5	689
	0.425	693	687	690
	0.426	693	684	688
	0.427	693	686	691
	0.428	694	688.5	687.5
	0.429	690.5	688	691
	0.43	693	689.5	690
	0.431	695	690	687
	0.432	693	690.5	690.5
	0.433	694.5	686.5	690.5
	0.434	695.5	687	688.5
	0.435	694	685.5	685.5
	0.436	698.5	686.5	689.5
	0.437	697.5	688.5	689.5
	0.438	695	689	688
	0.439	692	689.5	689
	0.44	696	685.5	688.5
	0.441	693	687.5	690
	0.442	693	687.5	689
	0.443	697	687.5	688.5
	0.444	697	689	687.5
	0.445	695	685	689.5
	0.446	696	687.5	690.5
	0.447	694	689	690.5
	0.448	701.5	686.5	689
	0.449	699.5	686.5	689
	0.45	696.5	683.5	689.5
	0.451	697.5	687	689.5
	0.452	697.5	684.5	690
	0.453	696.5	688	686
	0.454	696	688.5	687.5
	0.455	698.5	690	690
	0.456	697.5	689	686
	0.457	692.5	692	688.5
	0.458	698	690	685
	0.459	697.5	686.5	690.5
	0.46	697.5	691.5	691
	0.461	697	686.5	687.5
	0.462	696	686.5	689.5
	0.463	693	685	686.5
	0.464	697	693	688.5
	0.465	697.5	688	692.5
	0.466	698	689	688
	0.467	693	688.5	686.5
	0.468	695	689.5	690.5
	0.469	695	686.5	689.5
	0.47	695	688	689
	0.471	695	690	688.5
	0.472	694	690	688.5
	0.473	697.5	690	691
	0.474	696	690	687.5
	0.475	697	686	690.5
	0.476	696	687	688.5
	0.477	697	688.5	690.5
	0.478	698	687.5	692.5
	0.479	695	688	693
	0.48	693	688.5	691
	0.481	694.5	687.5	693
	0.482	693	690.5	691.5
	0.483	693	690	690.5
	0.484	697	694	693
	0.485	696	693	690.5
	0.486	695	688	692
	0.487	698.5	688.5	692.5
	0.488	696	688.5	691
	0.489	694	691	692.5
	0.49	694.5	692	694
	0.491	692	693	691
	0.492	697	691.5	693
	0.493	693	693	693
	0.494	696	690	693
	0.495	693	691	697
	0.496	693	691	688.5
	0.497	692.5	691	695.5
	0.498	693	691	691.5
	0.499	697	690.5	690
	0.5	692	692.5	691
	0.501	697	692.5	690.5
	0.502	692	691	693
	0.503	692	693	690.5
	0.504	694.5	693	691
	0.505	693	693	690.5
	0.506	693	693	690
	0.507	694	695	693
	0.508	693	693	690.5
	0.509	696	694.5	693
	0.51	693	692.5	689.5
	0.511	693	697	690.5
	0.512	694.5	696.5	690.5
	0.513	692	698	690.5
	0.514	691.5	692.5	690
	0.515	692.5	697.5	692
	0.516	692.5	695.5	688
	0.517	694	696.5	686
	0.518	692	695.5	685
	0.519	690.5	693	685.5
	0.52	696	697.5	688.5
	0.521	690.5	694	687
	0.522	692	693	688.5
	0.523	688.5	692.5	684
	0.524	691	694.5	687
	0.525	693	693	686.5
	0.526	691.5	695	682
	0.527	693	691.5	683.5
	0.528	688.5	694.5	685
	0.529	690.5	693	685
	0.53	694.5	695.5	687.5
	0.531	690.5	697	687
	0.532	691.5	694.5	683.5
	0.533	692	695	685.5
	0.534	695	696.5	685.5
	0.535	690	697	684
	0.536	691.5	694	684.5
	0.537	694	696	685.5
	0.538	690.5	691.5	684
	0.539	694.5	694.5	684.5
	0.54	688.5	694.5	684
	0.541	691	694.5	686.5
	0.542	692	693	683.5
	0.543	692	691	687.5
	0.544	690.5	693	686.5
	0.545	691	695	683
	0.546	690.5	695	684.5
	0.547	693	695	683
	0.548	689.5	693	687.5
	0.549	693	693	684
	0.55	688.5	692.5	684
	0.551	691.5	691.5	686.5
	0.552	692.5	693	684.5
	0.553	689.5	695.5	688.5
	0.554	691.5	693	690
	0.555	691.5	689	682.5
	0.556	691	692.5	686.5
	0.557	690	690	681
	0.558	690	689	683.5
	0.559	689.5	690	684
	0.56	691	690.5	684
	0.561	690	694.5	684
	0.562	688	689.5	686.5
	0.563	690.5	690.5	685
	0.564	691	689.5	686
	0.565	687	692.5	687.5
	0.566	691.5	691	686
	0.567	690.5	690	689
	0.568	690.5	690	687
	0.569	691.5	687.5	686.5
	0.57	692	688	684.5
	0.571	687.5	688.5	688
	0.572	693	686.5	689.5
	0.573	692	689.5	687
	0.574	693	690.5	691
	0.575	689.5	689	687
	0.576	694.5	688.5	690
	0.577	692	689.5	690
	0.578	689.5	689	688.5
	0.579	690	687	692.5
	0.58	692	687	691
	0.581	692.5	689.5	690.5
	0.582	691	689.5	693
	0.583	692	686	692.5
	0.584	693	687	693
	0.585	695.5	690.5	690.5
	0.586	690.5	690	696
	0.587	692.5	690.5	693
	0.588	689.5	689.5	697.5
	0.589	691	689.5	694
	0.59	696.5	689	694.5
	0.591	693	687.5	695.5
	0.592	690	687	693
	0.593	693	684.5	695.5
	0.594	694.5	688	697.5
	0.595	691	689.5	695.5
	0.596	688	689.5	692.5
	0.597	688.5	685.5	693
	0.598	694.5	687.5	697
	0.599	693	688	698.5
	0.6	691	687.5	698.5
	0.601	693	689.5	697
	0.602	690.5	688	697
	0.603	693	689.5	692.5
	0.604	696.5	690	698
	0.605	690.5	685.5	694.5
	0.606	692	688	696.5
	0.607	692.5	687	696
	0.608	695	689.5	695
	0.609	692.5	688.5	698.5
	0.61	692.5	687.5	695.5
	0.611	693	691	695
	0.612	690.5	690.5	697.5
	0.613	693	690.5	696.5
	0.614	692	690.5	695
	0.615	693	688.5	697.5
	0.616	693	690.5	696.5
	0.617	696	690	695
	0.618	694.5	690	696
	0.619	693	692.5	695
	0.62	694	691.5	696
	0.621	693	692	694
	0.622	692	692	697.5
	0.623	693	690.5	690.5
	0.624	694	690.5	692
	0.625	694.5	693	692.5
	0.626	691.5	690.5	692.5
	0.627	692.5	693	697.5
	0.628	693	693	695.5
	0.629	696	691.5	692.5
	0.63	695	692.5	692.5
	0.631	695.5	692.5	691.5
	0.632	694.5	692	691.5
	0.633	691	689.5	695
	0.634	691.5	691.5	693
	0.635	690.5	694	690.5
	0.636	693	692.5	691
	0.637	696	689.5	688.5
	0.638	694.5	689	691.5
	0.639	694	695.5	689.5
	0.64	695	690.5	691
	0.641	695.5	692	692
	0.642	696.5	690.5	689.5
	0.643	692.5	690	692
	0.644	690.5	692.5	690
	0.645	697	690.5	691
	0.646	687.5	692.5	689.5
	0.647	694.5	693	686.5
	0.648	692	689.5	688
	0.649	691.5	692	689
	0.65	694.5	688.5	690.5
	0.651	693	691	690.5
	0.652	693	692	687.5
	0.653	690.5	690	691
	0.654	690.5	688	689.5
	0.655	691.5	692	686.5
	0.656	690.5	691.5	687.5
	0.657	693	691.5	690
	0.658	694.5	687.5	689.5
	0.659	693	691.5	688.5
	0.66	694	689	689.5
	0.661	690.5	689.5	688
	0.662	692	690.5	690
	0.663	691	691.5	689.5
	0.664	690.5	688	690.5
	0.665	692	689.5	690
	0.666	690.5	686.5	691
	0.667	697	685.5	686.5
	0.668	692.5	685.5	690
	0.669	693	687	686
	0.67	692.5	691.5	689.5
	0.671	686.5	690.5	690.5
	0.672	693	688.5	686.5
	0.673	693	688.5	686
	0.674	691	687.5	687
	0.675	693	688.5	686.5
	0.676	691	688.5	687.5
	0.677	693	689	687
	0.678	695	687.5	688
	0.679	692.5	685.5	685.5
	0.68	693	686.5	689
	0.681	693	689.5	687.5
	0.682	691	686.5	688.5
	0.683	693	691	686.5
	0.684	691	690.5	691
	0.685	692.5	689	688.5
	0.686	692	685.5	688
	0.687	694.5	685.5	687.5
	0.688	691	691	688.5
	0.689	693	687.5	689
	0.69	693	690.5	690.5
	0.691	693	688.5	686
	0.692	693	690.5	685
	0.693	692	687.5	689.5
	0.694	691.5	689	686
	0.695	690.5	693	687
	0.696	690	688	689
	0.697	692	690.5	690.5
	0.698	695	690.5	691
	0.699	689.5	689.5	689
	0.7	691	689.5	690
	0.701	694	690.5	689.5
	0.702	693	690.5	690
	0.703	693	690.5	689.5
	0.704	696	693	689
	0.705	692	691	692
	0.706	692	693	689
	0.707	693	690	691.5
	0.708	691	693	689.5
	0.709	692	689.5	692
	0.71	692.5	690.5	691.5
	0.711	693	693	693
	0.712	690.5	693	692.5
	0.713	692	692.5	694
	0.714	694	692.5	692
	0.715	693	693	695
	0.716	691.5	691	693
	0.717	692	693	692
	0.718	693	694	692
	0.719	692	691.5	693
	0.72	691.5	693	695
	0.721	693	695.5	692
	0.722	693	693	696.5
	0.723	692	696	691.5
	0.724	696	693	691
	0.725	693	692	692
	0.726	691.5	692.5	696
	0.727	695.5	691.5	692.5
	0.728	693	694	691.5
	0.729	696	690	695
	0.73	697.5	693	695
	0.731	696	697	696.5
	0.732	696	691	695.5
	0.733	697.5	693	694
	0.734	697.5	692	695
	0.735	693	695	694.5
	0.736	693	693	694.5
	0.737	695.5	694.5	695
	0.738	697.5	694.5	693
	0.739	696.5	694	692.5
	0.74	698.5	690.5	693
	0.741	694.5	694.5	688.5
	0.742	696	691	693
	0.743	697.5	695.5	695
	0.744	699.5	694.5	696
	0.745	696.5	692	690.5
	0.746	698.5	694.5	691.5
	0.747	698	692.5	693
	0.748	694.5	691	697.5
	0.749	697.5	694	693
	0.75	696.5	694.5	690.5
	0.751	698	695	695
	0.752	695.5	695.5	690.5
	0.753	700.5	691	692
	0.754	699.5	689.5	693
	0.755	695.5	696	693
	0.756	698.5	694.5	692.5
	0.757	697	692.5	693
	0.758	697	696.5	694
	0.759	696.5	693	696
	0.76	693	697	695
	0.761	695.5	690	693
	0.762	697	692	691.5
	0.763	690.5	693	695.5
	0.764	696.5	693	692
	0.765	693	693	693
	0.766	695.5	690	692
	0.767	692	692.5	690.5
	0.768	692.5	693	690.5
	0.769	694	692	690.5
	0.77	694	693	690.5
	0.771	692	691.5	691
	0.772	696.5	691	688.5
	0.773	693	691	693
	0.774	693	689	695.5
	0.775	689.5	689.5	690.5
	0.776	690.5	690.5	689
	0.777	695	689.5	691.5
	0.778	691.5	693	691.5
	0.779	693	688	688.5
	0.78	691	690	691.5
	0.781	691	686.5	688.5
	0.782	692.5	689	691.5
	0.783	690.5	688.5	687.5
	0.784	693	687	691
	0.785	691.5	688.5	691
	0.786	691.5	686.5	693
	0.787	691.5	688.5	692
	0.788	691	690	693
	0.789	690	687	689
	0.79	689	684	692
	0.791	689.5	687	694
	0.792	692.5	688	692
	0.793	690	684	689
	0.794	685.5	686.5	689.5
	0.795	690.5	688.5	692.5
	0.796	688	686.5	692.5
	0.797	690.5	687.5	689.5
	0.798	689	685.5	690.5
	0.799	691.5	688.5	691
	0.8	692	685.5	692.5
	0.801	688.5	682.5	692.5
	0.802	690.5	685.5	695.5
	0.803	687.5	687	691
	0.804	690.5	684.5	690.5
	0.805	689.5	686.5	693
	0.806	691	687	689.5
	0.807	689.5	684	691.5
	0.808	690	685.5	691
	0.809	690.5	686.5	690.5
	0.81	690.5	686.5	692.5
	0.811	688.5	685.5	693
	0.812	687	687	693
	0.813	690.5	684	691.5
	0.814	688	682.5	690.5
	0.815	686.5	684.5	688
	0.816	687	685.5	697.5
	0.817	688.5	685.5	689.5
	0.818	688	689	690.5
	0.819	688	683.5	691
	0.82	684	685.5	693
	0.821	686.5	685	695
	0.822	687	688.5	694.5
	0.823	687.5	686.5	691
	0.824	684	688.5	689
	0.825	682	687	692.5
	0.826	684.5	686	692
	0.827	686.5	685.5	694.5
	0.828	688.5	690	693
	0.829	687.5	688	690.5
	0.83	686.5	686.5	687.5
	0.831	685.5	689	690.5
	0.832	686.5	689	695
	0.833	688	689.5	693
	0.834	691	689.5	689.5
	0.835	686.5	690	691
	0.836	687.5	689.5	694.5
	0.837	685	690	692
	0.838	681	691.5	693
	0.839	687	685	691
	0.84	687	690.5	693
	0.841	687	686.5	688.5
	0.842	686	690.5	691
	0.843	685	692	690.5
	0.844	685	688.5	691.5
	0.845	685.5	687.5	689
	0.846	684	691	689.5
	0.847	688.5	690.5	693
	0.848	684.5	689	692
	0.849	689	685.5	691.5
	0.85	688.5	687.5	691
	0.851	686	689	693
	0.852	690.5	692.5	689.5
	0.853	687	690.5	690
	0.854	690.5	689.5	690.5
	0.855	682.5	688.5	689
	0.856	690.5	689.5	692
	0.857	690.5	688.5	689.5
	0.858	688	689	690.5
	0.859	690	691	690.5
	0.86	685.5	689	690.5
	0.861	689	689.5	693
	0.862	689.5	689	690.5
	0.863	691.5	688	690.5
	0.864	690.5	686.5	692
	0.865	690.5	689	691.5
	0.866	690.5	688.5	689
	0.867	690.5	687.5	693
	0.868	689	685	689.5
	0.869	689	688.5	689.5
	0.87	688.5	690.5	693
	0.871	689.5	690.5	691
	0.872	691	690.5	684.5
	0.873	693	688	692
	0.874	693	685.5	690.5
	0.875	689.5	685.5	692.5
	0.876	690.5	689	690.5
	0.877	692.5	684.5	689.5
	0.878	690.5	687.5	690.5
	0.879	690.5	686.5	691.5
	0.88	692.5	685.5	690
	0.881	690.5	684	693
	0.882	693	687	690.5
	0.883	691.5	686	691.5
	0.884	688.5	684	689.5
	0.885	692	686	691.5
	0.886	691	685.5	695.5
	0.887	691	684.5	697
	0.888	691.5	681.5	692.5
	0.889	693	683	693
	0.89	690	683.5	693
	0.891	693	684	691
	0.892	690.5	687	690.5
	0.893	691	681.5	690.5
	0.894	690.5	682	694.5
	0.895	690.5	685.5	694.5
	0.896	690	681	691.5
	0.897	692	681	692
	0.898	692	684	693
	0.899	690.5	684	695.5
	0.9	692	681	696
	0.901	691	682.5	693
	0.902	692	687.5	691.5
	0.903	690	677	695
	0.904	693	684	693
	0.905	691	684	692
	0.906	693	682.5	693
	0.907	692.5	684	693
	0.908	694.5	683.5	692.5
	0.909	697	682.5	690.5
	0.91	687.5	684	692
	0.911	694.5	683.5	692.5
	0.912	693.5	678	692
	0.913	692.5	683	694
	0.914	693	679.5	693
	0.915	696.5	679	690.5
	0.916	693	684	695
	0.917	693	678	691.5
	0.918	697.5	683.5	690
	0.919	694.5	683	693
	0.92	697	682	690
	0.921	693	684	691
	0.922	696.5	684	691
	0.923	691.5	682.5	689
	0.924	693	688	689
	0.925	697.5	684	691.5
	0.926	695	683.5	690
	0.927	696.5	689.5	688
	0.928	696.5	686	688
	0.929	692.5	687	688.5
	0.93	697.5	684	687.5
	0.931	696	686.5	690.5
	0.932	693	686.5	687
	0.933	693	685.5	686
	0.934	696.5	688.5	688.5
	0.935	696	686.5	689.5
	0.936	694	689	687
	0.937	695	684.5	690.5
	0.938	696	685	687.5
	0.939	695.5	687.5	685.5
	0.94	699.5	689	685.5
	0.941	696	690.5	684
	0.942	694.5	689.5	685.5
	0.943	697.5	690	685
	0.944	694.5	687.5	687.5
	0.945	698.5	686	684
	0.946	696	688.5	684
	0.947	696	689	683.5
	0.948	696	688	684
	0.949	695.5	690	684.5
	0.95	695.5	690.5	681.5
	0.951	695.5	692	684
	0.952	693	688	683.5
	0.953	696	689	684
	0.954	695.5	691	686
	0.955	697	693	681
	0.956	699	694.5	684
	0.957	699	689	685
	0.958	692.5	691	682.5
	0.959	696.5	690.5	681.5
	0.96	697.5	695	682
	0.961	694	693	683.5
	0.962	694.5	693	682.5
	0.963	697.5	696	684
	0.964	696.5	692	684.5
	0.965	693	689.5	684
	0.966	697	691	683.5
	0.967	693	691	684.5
	0.968	698.5	696	683
	0.969	693	693	682
	0.97	697.5	690.5	685.5
	0.971	696.5	697.5	685.5
	0.972	697	690.5	686.5
	0.973	698.5	696.5	682
	0.974	697.5	698.5	688
	0.975	695	698	685.5
	0.976	697	694.5	683
	0.977	696	695	683
	0.978	697.5	691.5	684.5
	0.979	695.5	696	684
	0.98	692.5	693	682
	0.981	697	693	684
	0.982	693	696	685
	0.983	698	693	687
	0.984	696.5	695.5	684.5
	0.985	695	693	684
	0.986	698.5	693	686.5
	0.987	696.5	693	684
	0.988	696.5	695.5	689
	0.989	695.5	694.5	683
	0.99	696	695.5	689.5
	0.991	694.5	692	687
	0.992	698.5	696	685.5
	0.993	695	695	682
	0.994	695.5	692	686.5
	0.995	696	695.5	684
	0.996	698	693	688.5
	0.997	697	693	684.5
	0.998	698	696.5	686
	0.999	697	691	685
	1	698	692.5	690.5
	1.001	695	691	684.5
	1.002	695	689.5	687.5
	1.003	696	692	691
	1.004	696.5	692	689.5
	1.005	693	695	689
	1.006	696	690	687
	1.007	695	691	690.5
	1.008	693	694	688.5
	1.009	693	692	689.5
	1.01	695	690.5	690
	1.011	695.5	691.5	688
	1.012	689.5	696	688.5
	1.013	692	692	691.5
	1.014	692	688	688.5
	1.015	694.5	690.5	690
	1.016	690.5	690	693
	1.017	691.5	688.5	688.5
	1.018	693	693	690.5
	1.019	692	693	690.5
	1.02	692	692	692
	1.021	688	693	690.5
	1.022	692	690	691.5
	1.023	690	690.5	690.5
	1.024	692	690.5	691
	1.025	690	692	693
	1.026	689	692	695.5
	1.027	695	689.5	690.5
	1.028	691	686.5	687
	1.029	691.5	692	691.5
	1.03	690.5	688	689.5
	1.031	691.5	695.5	690.5
	1.032	691.5	692	690.5
	1.033	689	690	690.5
	1.034	687	688	690.5
	1.035	687.5	690.5	689
	1.036	691.5	690.5	691
	1.037	690.5	690.5	689.5
	1.038	688.5	693	690
	1.039	689.5	688.5	689.5
	1.04	689.5	689.5	688.5
	1.041	687	690.5	689
	1.042	685.5	688	689.5
	1.043	690.5	688.5	689.5
	1.044	693	688.5	689.5
	1.045	691	689	687.5
	1.046	686.5	690	692
	1.047	685	689.5	690.5
	1.048	690.5	691.5	688.5
	1.049	689.5	691.5	688.5
	1.05	687.5	686.5	690
	1.051	693	691.5	690
	1.052	694	689	689.5
	1.053	686	689.5	687.5
	1.054	690.5	691.5	689.5
	1.055	688.5	688.5	690.5
	1.056	690	690	690.5
	1.057	690.5	687.5	690.5
	1.058	690.5	687	689
	1.059	687	691	691
	1.06	689.5	687.5	693
	1.061	692	688.5	685.5
	1.062	691	688.5	688.5
	1.063	693	685.5	695
	1.064	693	688.5	689
	1.065	693	687	690
	1.066	691.5	689	688.5
	1.067	690	686.5	693
	1.068	691	689	689
	1.069	693	687.5	691.5
	1.07	689.5	685	691.5
	1.071	690.5	686.5	687.5
	1.072	687	684	690
	1.073	688.5	683.5	689.5
	1.074	691.5	685	689
	1.075	692.5	684.5	690.5
	1.076	693	684	694.5
	1.077	690	685	693
	1.078	688.5	684.5	692.5
	1.079	693	688.5	691.5
	1.08	693	689.5	691
	1.081	693	691	691.5
	1.082	693	686.5	691
	1.083	695	690.5	692.5
	1.084	695	689.5	695
	1.085	691.5	688	691
	1.086	694.5	688	692
	1.087	693	688.5	692
	1.088	693	690	691.5
	1.089	693	687.5	691.5
	1.09	692.5	693	691
	1.091	695.5	690	693
	1.092	693	689.5	693
	1.093	692	690	692.5
	1.094	695.5	689	692
	1.095	693	690.5	694.5
	1.096	691	690.5	691.5
	1.097	694.5	689.5	693
	1.098	695.5	695	693
	1.099	692	692.5	693
	1.1	694.5	699	694
	1.101	693	692	690.5
	1.102	695	696.5	697.5
	1.103	695.5	694.5	695.5
	1.104	694	692	696
	1.105	691	697	693
	1.106	692	697	697.5
	1.107	695.5	697	696
	1.108	691	698	693
	1.109	692.5	697.5	693
	1.11	692	698	696.5
	1.111	691.5	700	697.5
	1.112	691.5	700.5	697
	1.113	691	699	696.5
	1.114	693	703.5	696
	1.115	693	702.5	696
	1.116	692	700.5	697
	1.117	696	700.5	697.5
	1.118	695	702	697
	1.119	693	703.5	699
	1.12	690	700	696
	1.121	692	703	693
	1.122	697	705	693
	1.123	690.5	705.5	695.5
	1.124	690.5	701.5	695
	1.125	691.5	704	696.5
	1.126	689	700.5	697
	1.127	693	705	693
	1.128	692	703.5	693
	1.129	692.5	704.5	697.5
	1.13	693	700.5	696
	1.131	687	707	697
	1.132	691	704.5	697.5
	1.133	689.5	706	697
	1.134	689.5	706.5	695
	1.135	688.5	708	694.5
	1.136	692	702.5	692
	1.137	693	704	697.5
	1.138	688.5	704	698.5
	1.139	691	702.5	698.5
	1.14	691	704.5	697.5
	1.141	689.5	704	697.5
	1.142	693	703	692
	1.143	691.5	702	696.5
	1.144	694.5	702	693
	1.145	688.5	704.5	693
	1.146	691.5	700.5	696.5
	1.147	689.5	702.5	696.5
	1.148	690	700.5	693
	1.149	688	700.5	691.5
	1.15	688.5	700	697.5
	1.151	691	699	692
	1.152	691	700.5	693
	1.153	689.5	703.5	695
	1.154	690	696.5	696
	1.155	690	701.5	693
	1.156	689.5	698	691
	1.157	689.5	699.5	694.5
	1.158	690.5	697.5	693
	1.159	688	699	692.5
	1.16	692	700	691.5
	1.161	690	698	693
	1.162	690	699.5	691
	1.163	686.5	697.5	692
	1.164	690.5	699	690.5
	1.165	686.5	699	693
	1.166	691.5	697.5	691.5
	1.167	687	699	690.5
	1.168	690.5	694	692.5
	1.169	687	697.5	690
	1.17	690.5	697.5	690.5
	1.171	691.5	698.5	690.5
	1.172	687.5	697	691
	1.173	690.5	696	691.5
	1.174	691	698.5	691
	1.175	687.5	697.5	691
	1.176	694.5	696.5	690
	1.177	686	693	689
	1.178	690.5	700	692.5
	1.179	690	697	690.5
	1.18	690.5	695	691
	1.181	691	695	690.5
	1.182	692.5	697.5	693
	1.183	693	696.5	691
	1.184	697	696.5	689
	1.185	692	698	690.5
	1.186	692.5	696.5	690.5
	1.187	693	698	688.5
	1.188	696.5	697.5	688.5
	1.189	692.5	697.5	691
	1.19	689	696	690.5
	1.191	693	700.5	690.5
	1.192	690	700.5	686.5
	1.193	692.5	695	691
	1.194	692.5	696.5	689.5
	1.195	693	697	688
	1.196	691	699	688.5
	1.197	694	696	688
	1.198	691.5	699	690.5
	1.199	693	696.5	688
	1.2	694	697	686
	1.201	694.5	698.5	688
	1.202	692.5	696.5	691.5
	1.203	693	695	690.5
	1.204	692	695.5	691.5
	1.205	692.5	694	688.5
	1.206	697	697.5	689.5
	1.207	696	696	688
	1.208	693	694	688.5
	1.209	695	697.5	690
	1.21	691	694.5	691
	1.211	691.5	694	693
	1.212	695.5	695	687.5
	1.213	694	695	688.5
	1.214	691.5	696	694
	1.215	692.5	694.5	689
	1.216	691.5	693	691
	1.217	694	694	695.5
	1.218	692.5	692	695
	1.219	693	692	689.5
	1.22	691	691	689.5
	1.221	693	694	692.5
	1.222	696.5	693	691
	1.223	696	694.5	693
	1.224	695.5	693	691.5
	1.225	691	691	693
	1.226	690.5	694.5	695
	1.227	695	690.5	691.5
	1.228	691	687.5	690.5
	1.229	691	689.5	693
	1.23	691	688.5	695
	1.231	694	690.5	692.5
	1.232	690.5	689	692
	1.233	692.5	690.5	693
	1.234	690.5	690	693
	1.235	691.5	690.5	692
	1.236	693	689	691.5
	1.237	691.5	690.5	694.5
	1.238	690.5	690	692
	1.239	691	687	692.5
	1.24	693	694.5	690
	1.241	691	691.5	688.5
	1.242	691	690	693
	1.243	690.5	689.5	692.5
	1.244	692	690	689
	1.245	694.5	689.5	691
	1.246	688	690.5	690.5
	1.247	689.5	689.5	690
	1.248	692	689.5	694.5
	1.249	690.5	689.5	693
	1.25	689.5	693	691
	1.251	689	691	691
	1.252	689	690	689
	1.253	688	689.5	691.5
	1.254	692	691.5	692.5
	1.255	692	689.5	693
	1.256	690.5	693	690.5
	1.257	689.5	688	689
	1.258	690.5	692	692.5
	1.259	691.5	689	691.5
	1.26	689	690	690.5
	1.261	688.5	689.5	691
	1.262	686.5	691.5	691.5
	1.263	688	691	693
	1.264	686.5	686.5	690
	1.265	687.5	690.5	690.5
	1.266	686.5	689.5	689
	1.267	682.5	690.5	691
	1.268	686	689.5	690.5
	1.269	690.5	690.5	690.5
	1.27	689	690.5	691
	1.271	683	686.5	695.5
	1.272	688.5	689.5	691.5
	1.273	685.5	689.5	690.5
	1.274	682.5	686.5	692
	1.275	683.5	691.5	691
	1.276	686	688.5	691
	1.277	685.5	690	689.5
	1.278	684.5	689.5	692
	1.279	684	686.5	690
	1.28	684	689.5	692.5
	1.281	682.5	690.5	692.5
	1.282	682	690	690.5
	1.283	682	689	693
	1.284	684	688	693
	1.285	683	686.5	694
	1.286	684	689	690
	1.287	680.5	687.5	691.5
	1.288	683	689.5	692
	1.289	678	690	691
	1.29	682	690	693
	1.291	681.5	690.5	693
	1.292	681	687	697.5
	1.293	680.5	690	693
	1.294	678	687.5	694.5
	1.295	681	690.5	691
	1.296	678	688.5	694
	1.297	681	687	693
	1.298	678	690.5	697
	1.299	682	687	694.5
	1.3	680	690.5	691
	1.301	678	688	694.5
	1.302	681.5	688.5	691
	1.303	677	690	696
	1.304	678	687.5	694
	1.305	681.5	685.5	694.5
	1.306	678	687	695
	1.307	678	686.5	693
	1.308	678	686.5	696
	1.309	678	688	697
	1.31	680	685.5	693
	1.311	683	687.5	697.5
	1.312	680	687.5	695
	1.313	680.5	686.5	693
	1.314	677.5	688.5	692
	1.315	681	689.5	691.5
	1.316	677	686	690.5
	1.317	681	686	694
	1.318	678	684	694.5
	1.319	684.5	684.5	693
	1.32	678	688	694.5
	1.321	679.5	685.5	694.5
	1.322	681	686	690.5
	1.323	678	688.5	691.5
	1.324	684	684.5	691
	1.325	682.5	687	692
	1.326	681	689.5	693
	1.327	678	684.5	691.5
	1.328	685.5	688.5	691
	1.329	686	685	693
	1.33	687	690	691
	1.331	684	687	692
	1.332	689.5	686.5	691.5
	1.333	686	688	690
	1.334	688	693	687
	1.335	688.5	685.5	691
	1.336	687.5	689	689.5
	1.337	690	687.5	693
	1.338	687.5	686.5	691.5
	1.339	687.5	687	694.5
	1.34	692.5	688.5	690.5
	1.341	692	689.5	687.5
	1.342	690.5	689.5	689
	1.343	690.5	689.5	690.5
	1.344	690.5	690	689.5
	1.345	693	690.5	691
	1.346	690	689.5	691
	1.347	695.5	690	690.5
	1.348	693	689	687.5
	1.349	693	692	690
	1.35	695.5	691.5	687
	1.351	694	691.5	689.5
	1.352	692.5	691	691.5
	1.353	696	692	692
	1.354	697.5	691.5	690.5
	1.355	696	693	693
	1.356	697.5	693	690.5
	1.357	696	694	689
	1.358	697	690.5	688.5
	1.359	694.5	691	690.5
	1.36	697.5	693	690.5
	1.361	697.5	692	688
	1.362	697	692.5	689.5
	1.363	695.5	691.5	690.5
	1.364	698.5	690.5	686
	1.365	697	693	689.5
	1.366	699	694.5	689.5
	1.367	696	694.5	692
	1.368	699	691	687
	1.369	698.5	695.5	689.5
	1.37	699	693	692
	1.371	698	696.5	688
	1.372	698.5	690	690.5
	1.373	697.5	693	691
	1.374	698.5	690.5	686.5
	1.375	701	690.5	691
	1.376	698.5	692	684.5
	1.377	699.5	693	686.5
	1.378	702	693	687.5
	1.379	699	693	689
	1.38	703	689.5	687
	1.381	697.5	690	687.5
	1.382	699	689	686
	1.383	700.5	691	687
	1.384	699.5	690.5	687.5
	1.385	701.5	692.5	689.5
	1.386	702.5	692.5	689.5
	1.387	702.5	691	687
	1.388	699	690.5	685.5
	1.389	701.5	689	688
	1.39	700	690.5	687
	1.391	699.5	691.5	691
	1.392	701.5	691	688
	1.393	699.5	689.5	687
	1.394	702.5	690.5	690
	1.395	697.5	688.5	686.5
	1.396	698.5	691	684.5
	1.397	701.5	690.5	686.5
	1.398	697.5	691.5	683.5
	1.399	703	689.5	685
	1.4	699.5	690.5	687.5
	1.401	701.5	686.5	685.5
	1.402	697	692	684
	1.403	699.5	689	685.5
	1.404	702	692	682.5
	1.405	701	690.5	683
	1.406	699	690.5	685.5
	1.407	700.5	690.5	686.5
	1.408	700	690	683.5
	1.409	698.5	693	681
	1.41	700.5	691	682.5
	1.411	698	691	683.5
	1.412	697.5	689.5	681.5
	1.413	700	689.5	683
	1.414	696.5	690.5	684
	1.415	696	688.5	682
	1.416	700.5	690.5	681.5
	1.417	692.5	687	683
	1.418	695	687	683.5
	1.419	696.5	692	682
	1.42	697.5	688	684
	1.421	692	689	684
	1.422	696	691.5	684
	1.423	695	690	681
	1.424	693	689.5	684
	1.425	695	688	681.5
	1.426	694	690.5	683
	1.427	693	688.5	682.5
	1.428	693.5	688	684
	1.429	693	684	685.5
	1.43	696	686.5	685.5
	1.431	694	686	683
	1.432	693.5	690.5	683.5
	1.433	692.5	684	683.5
	1.434	692	685.5	683
	1.435	691	686	683.5
	1.436	691.5	686	685.5
	1.437	689	683.5	686.5
	1.438	687.5	682.5	689
	1.439	691	683.5	687.5
	1.44	687.5	683.5	685.5
	1.441	688.5	684	684.5
	1.442	685	684	686
	1.443	685.5	681	688
	1.444	685.5	684	688
	1.445	685.5	682	689
	1.446	685	682.5	687
	1.447	683	681.5	688.5
	1.448	684	677	687
	1.449	681.5	681	690
	1.45	678	680	687
	1.451	678	677	688.5
	1.452	678	677	685.5
	1.453	675.5	675.5	691
	1.454	680	676	689
	1.455	675	673.5	688
	1.456	675	677	685.5
	1.457	677.5	673.5	690
	1.458	674	677.5	689.5
	1.459	673	675.5	688.5
	1.46	674	674	688
	1.461	671.5	672.5	689
	1.462	671	672.5	688.5
	1.463	671.5	672.5	690.5
	1.464	672.5	672	688
	1.465	668.5	670.5	691
	1.466	664.5	672.5	691.5
	1.467	667	670.5	691
	1.468	668	669.5	689
	1.469	667	668	692.5
	1.47	667	669	693
	1.471	662.5	668	690.5
	1.472	663.5	669	690.5
	1.473	662	669.5	692
	1.474	662.5	665	693
	1.475	663.5	663.5	690
	1.476	662.5	664	692.5
	1.477	656.5	665	691.5
	1.478	656	663.5	695
	1.479	659	664.5	693
	1.48	658.5	661	693
	1.481	657.5	660.5	692
	1.482	656	661.5	691.5
	1.483	656.5	657.5	690
	1.484	652.5	658.5	695.5
	1.485	654.5	657.5	689.5
	1.486	652.5	656	693
	1.487	655.5	658.5	691
	1.488	656	658.5	692.5
	1.489	655.5	654.5	693
	1.49	651.5	657.5	690
	1.491	648.5	662	692.5
	1.492	648.5	655.5	693
	1.493	648.5	654.5	688.5
	1.494	648.5	654.5	692.5
	1.495	647	658	693
	1.496	648	655	693
	1.497	645	654.5	691.5
	1.498	643.5	653	693
	1.499	643.5	655.5	690.5
	1.5	644.5	654	691.5
	1.501	643	653	695.5
	1.502	643	651	691
	1.503	643	652.5	690
	1.504	639.5	655.5	690.5
	1.505	640	653	691
	1.506	637.5	650	691.5
	1.507	637	652.5	694.5
	1.508	636	654.5	693.5
	1.509	633	651	692
	1.51	635	650.5	691
	1.511	629.5	648.5	692
	1.512	632.5	651.5	693
	1.513	629.5	645.5	695
	1.514	633	648.5	696.5
	1.515	624	651.5	690.5
	1.516	628	647	692.5
	1.517	625	648.5	690.5
	1.518	622	646	690.5
	1.519	624.5	646	690
	1.52	620	647	694.5
	1.521	618.5	646	689
	1.522	615.5	643.5	691
	1.523	617	641	694
	1.524	614.5	643	690
	1.525	613	641	690.5
	1.526	610.5	643.5	690.5
	1.527	608.5	636.5	691
	1.528	606.5	642	689
	1.529	606	638	689.5
	1.53	608.5	636.5	690.5
	1.531	603.5	632.5	690.5
	1.532	599	633	693
	1.533	598	632	690
	1.534	598	627.5	689
	1.535	595	628.5	690.5
	1.536	588.5	625	688
	1.537	591.5	629	689.5
	1.538	588	624.5	690
	1.539	585	627	690
	1.54	583	620.5	691
	1.541	581.5	617.5	688.5
	1.542	582.5	615.5	689.5
	1.543	577.5	615.5	689
	1.544	572.5	610.5	689
	1.545	574	608	690
	1.546	573	608.5	687.5
	1.547	567.5	605	695
	1.548	566.5	603.5	688.5
	1.549	565	601	686.5
	1.55	561.5	598	689
	1.551	556	595.5	689
	1.552	556.5	594.5	692
	1.553	558	592.5	692.5
	1.554	547.5	588.5	690.5
	1.555	549.5	588	688.5
	1.556	547	581.5	685.5
	1.557	542	586.5	692.5
	1.558	540	579.5	689.5
	1.559	537	577	686
	1.56	536	576.5	687.5
	1.561	531.5	574	688
	1.562	529	573	688
	1.563	528.5	567.5	689
	1.564	525.5	567.5	690
	1.565	523	569.5	690.5
	1.566	521.5	566.5	689
	1.567	516.5	563.5	690.5
	1.568	510.5	560.5	687.5
	1.569	511.5	559	688.5
	1.57	510.5	559	692
	1.571	509.5	558.5	691
	1.572	508	556	691.5
	1.573	504	554.5	688
	1.574	500.5	551.5	690
	1.575	497.5	549	689
	1.576	498.5	551	693
	1.577	493.5	550	689
	1.578	491	547	690.5
	1.579	489.5	546.5	689
	1.58	484	544	688.5
	1.581	482	541.5	688
	1.582	480.5	544	689
	1.583	477.5	540	689.5
	1.584	476.5	542	689.5
	1.585	474.5	538	689.5
	1.586	469.5	538.5	689.5
	1.587	468.5	539	691.5
	1.588	466	536.5	690.5
	1.589	464.5	538	691
	1.59	462	533.5	688.5
	1.591	458.5	536	691.5
	1.592	456	532.5	691.5
	1.593	457.5	533	690.5
	1.594	450	529	690
	1.595	450	528.5	688
	1.596	446	527	690.5
	1.597	446	527	689
	1.598	439.5	526	687
	1.599	438.5	525	689.5
	1.6	437.5	523.5	689.5
	1.601	435	524	689
	1.602	427.5	523	691
	1.603	429	519.5	688.5
	1.604	425.5	520.5	690
	1.605	422.5	516.5	690
	1.606	418	511.5	691
	1.607	415.5	518	690.5
	1.608	415.5	512.5	690.5
	1.609	412.5	513	692
	1.61	410	509.5	692
	1.611	407.5	508.5	693
	1.612	407.5	505	690.5
	1.613	403.5	508	690.5
	1.614	400.5	504	690.5
	1.615	398.5	502.5	689.5
	1.616	396.5	499	690
	1.617	396	497	691
	1.618	395	498	690.5
	1.619	389.5	493.5	691.5
	1.62	388.5	491.5	693
	1.621	384	487.5	692
	1.622	382.5	487	694
	1.623	383	483.5	686.5
	1.624	380	483	692.5
	1.625	375	481	690
	1.626	377	477.5	691.5
	1.627	372	474.5	690.5
	1.628	373	473	691
	1.629	372.5	474	691
	1.63	372.5	469.5	693
	1.631	366.5	464	693
	1.632	362.5	466	691
	1.633	365	461	695
	1.634	366	457	688.5
	1.635	365	455	690.5
	1.636	364.5	452.5	690.5
	1.637	363	451.5	692
	1.638	357.5	450	689.5
	1.639	355	446.5	689
	1.64	357.5	446	695.5
	1.641	356.5	442	690.5
	1.642	353	437.5	690.5
	1.643	354	436	691.5
	1.644	348.5	431.5	692.5
	1.645	350	432	688.5
	1.646	352.5	430.5	690
	1.647	347.5	427.5	691.5
	1.648	346.5	423	692
	1.649	347.5	426	691
	1.65	348.5	422	690.5
	1.651	346.5	418	692.5
	1.652	343.5	420.5	693
	1.653	346.5	416	691.5
	1.654	348.5	410	691
	1.655	345	415.5	690
	1.656	345	412.5	690.5
	1.657	347.5	409	690.5
	1.658	344.5	406	691.5
	1.659	345.5	409	692
	1.66	344.5	406	691
	1.661	342	406	690
	1.662	343.5	402.5	692
	1.663	346	402.5	693
	1.664	350	403.5	693
	1.665	343.5	396	689.5
	1.666	344	399	696.5
	1.667	347.5	395	693
	1.668	346.5	394.5	689.5
	1.669	344	394.5	688
	1.67	345.5	394	689
	1.671	346	394	691.5
	1.672	349	393	691
	1.673	347	392.5	691.5
	1.674	351	389.5	691
	1.675	349.5	390.5	694.5
	1.676	347.5	395	691.5
	1.677	348	390	695.5
	1.678	350	392	693
	1.679	352.5	389	691
	1.68	353	385.5	692
	1.681	351	384.5	695.5
	1.682	355	386	695.5
	1.683	353.5	385.5	694
	1.684	357	387.5	696
	1.685	356.5	386.5	696
	1.686	355	387.5	695
	1.687	359.5	385	692.5
	1.688	362.5	386.5	695.5
	1.689	359	384	694.5
	1.69	365	387.5	691.5
	1.691	363.5	383.5	698.5
	1.692	366	387.5	694.5
	1.693	366	386.5	696
	1.694	372	386.5	699
	1.695	374.5	385.5	697.5
	1.696	377	385.5	698
	1.697	383	385	698
	1.698	380	388	697.5
	1.699	383	384.5	698.5
	1.7	385.5	384.5	698.5
	1.701	389.5	382.5	698
	1.702	393	383	700.5
	1.703	394.5	386	699.5
	1.704	394	384.5	697.5
	1.705	401	382.5	700.5
	1.706	403.5	383	697
	1.707	403.5	386.5	696
	1.708	405	383.5	700.5
	1.709	407	383	698.5
	1.71	412	382.5	698.5
	1.711	409	383	702.5
	1.712	413	380.5	700
	1.713	415	385.5	702
	1.714	413.5	382.5	704.5
	1.715	419	379.5	702.5
	1.716	416	380.5	706
	1.717	417.5	384.5	705.5
	1.718	421	382	706.5
	1.719	420	381	704.5
	1.72	418.5	383	705.5
	1.721	423	383	707
	1.722	420.5	383	707.5
	1.723	422.5	383	706.5
	1.724	420	382.5	708
	1.725	420	382	708
	1.726	417	383	708
	1.727	421.5	381.5	708
	1.728	419.5	386.5	708
	1.729	417	383.5	708
	1.73	420.5	386	708
	1.731	421.5	387	708
	1.732	420.5	390.5	711
	1.733	425.5	389.5	708
	1.734	423.5	393	713
	1.735	425	392	711
	1.736	427	396.5	711.5
	1.737	429.5	396	711.5
	1.738	431	397	708
	1.739	433.5	402	711
	1.74	435	403.5	713.5
	1.741	439	400.5	711
	1.742	443.5	406	708
	1.743	444.5	404.5	712
	1.744	447.5	405	708
	1.745	452.5	409	712.5
	1.746	455.5	412	708
	1.747	459.5	411	708
	1.748	459	415.5	708
	1.749	465	415	708
	1.75	465.5	415	712.5
	1.751	475.5	417	706.5
	1.752	475	420.5	708
	1.753	480.5	417	708
	1.754	486.5	423	708
	1.755	489	424	708
	1.756	494	425.5	707
	1.757	497.5	428.5	705
	1.758	499	430.5	707
	1.759	508	428	708
	1.76	508	431.5	698
	1.761	512.5	432.5	707
	1.762	516	433	704.5
	1.763	521.5	437.5	701
	1.764	523.5	439.5	703.5
	1.765	529	439	700
	1.766	533	442.5	697.5
	1.767	536.5	444.5	695
	1.768	540	448	695
	1.769	544	449	699
	1.77	551	453	697
	1.771	553.5	457.5	693.5
	1.772	552.5	457.5	692
	1.773	558.5	460.5	695
	1.774	563	465.5	690.5
	1.775	562.5	468.5	692
	1.776	569	475	690.5
	1.777	572.5	474.5	690.5
	1.778	577.5	483	687.5
	1.779	582.5	487	689.5
	1.78	584.5	486	685.5
	1.781	586.5	495	686.5
	1.782	592	501	686.5
	1.783	596	504.5	684
	1.784	601.5	508	685
	1.785	608	510	683
	1.786	611	514	688.5
	1.787	616.5	522	682.5
	1.788	620	522.5	684
	1.789	626.5	528	684
	1.79	629.5	533.5	682
	1.791	633.5	536	685.5
	1.792	639	542	684
	1.793	648.5	542.5	678
	1.794	645	551	683
	1.795	648.5	555.5	677.5
	1.796	658	562.5	681
	1.797	662	568	680
	1.798	668	570.5	680.5
	1.799	672	580	677
	1.8	680.5	585	678
	1.801	684	588.5	680
	1.802	688.5	595	682
	1.803	695	600	680.5
	1.804	699.5	603.5	678
	1.805	705.5	613.5	681
	1.806	713.5	615.5	678
	1.807	717	623.5	678
	1.808	727	627.5	679
	1.809	729	635	678
	1.81	737.5	639.5	677.5
	1.811	744.5	647	678
	1.812	751.5	653.5	677.5
	1.813	756.5	659	677
	1.814	766	662	679.5
	1.815	767.5	669.5	681
	1.816	776.5	674.5	678
	1.817	786	678	678.5
	1.818	793	689	677
	1.819	796.5	693	681
	1.82	804.5	699	677.5
	1.821	812.5	704.5	678
	1.822	814	711	678
	1.823	821.5	721	678
	1.824	827.5	723	677.5
	1.825	830.5	731.5	678
	1.826	841.5	742.5	677
	1.827	848	747.5	674.5
	1.828	853.5	752.5	677
	1.829	862	759	678
	1.83	864.5	767.5	678
	1.831	874	771	676.5
	1.832	879	782.5	675.5
	1.833	885.5	786.5	677
	1.834	893	795	674
	1.835	896	805.5	674
	1.836	907.5	810	672.5
	1.837	911.5	819	670
	1.838	921	827.5	672
	1.839	929	836.5	672
	1.84	936.5	841	670
	1.841	941.5	855	670.5
	1.842	946.5	857	667.5
	1.843	957	862.5	671.5
	1.844	964.5	878.5	666.5
	1.845	973.5	884	667
	1.846	981	890.5	666
	1.847	987.5	899	662
	1.848	998.5	908.5	665
	1.849	1002.5	912	664.5
	1.85	1012.5	923	662.5
	1.851	1020	931.5	662.5
	1.852	1031.5	941	661
	1.853	1036	946.5	660.5
	1.854	1046.5	956.5	658.5
	1.855	1057.5	967	658
	1.856	1065.5	971.5	658.5
	1.857	1074.5	985	651
	1.858	1084.5	994	655
	1.859	1095.5	997	653.5
	1.86	1102.5	1004	648.5
	1.861	1115.5	1015.5	648.5
	1.862	1125.5	1021	647.5
	1.863	1133.5	1027	647
	1.864	1144	1036	644.5
	1.865	1155.5	1045	643
	1.866	1162.5	1051	646
	1.867	1176	1057	645
	1.868	1183	1066	640
	1.869	1194	1075	637.5
	1.87	1204.5	1079	638
	1.871	1215	1086.5	637.5
	1.872	1229.5	1094	633.5
	1.873	1226	1098	633.5
	1.874	1227	1103	633.5
	1.875	1235	1109.5	632
	1.876	1244.5	1115	628
	1.877	1259.5	1120.5	626
	1.878	1272	1125.5	625.5
	1.879	1285.5	1135	623
	1.88	1292.5	1137	622
	1.881	1301	1144	619.5
	1.882	1304	1149	617.5
	1.883	1310.5	1151	617
	1.884	1319.5	1155	612
	1.885	1327	1161	617.5
	1.886	1333	1166.5	613.5
	1.887	1343.5	1170	612
	1.888	1348.5	1174	611
	1.889	1360.5	1185	606.5
	1.89	1363	1185	605.5
	1.891	1371.5	1185	605.5
	1.892	1379	1199	606
	1.893	1379	1204	603.5
	1.894	1384.5	1206.5	602
	1.895	1388	1213.5	601
	1.896	1394	1221	592.5
	1.897	1401.5	1222.5	595
	1.898	1403	1226.5	595
	1.899	1409	1229.5	591.5
	1.9	1413.5	1236	591
	1.901	1419.5	1240	588.5
	1.902	1420.5	1243	588
	1.903	1423.5	1244.5	585
	1.904	1422.5	1244.5	582
	1.905	1423.5	1250.5	579.5
	1.906	1431	1256.5	580
	1.907	1433	1263	577
	1.908	1433	1264.5	577.5
	1.909	1438.5	1270	574
	1.91	1438.5	1271	575
	1.911	1445.5	1274.5	573
	1.912	1444.5	1274.5	570.5
	1.913	1447	1274.5	568.5
	1.914	1453.5	1283	562.5
	1.915	1453.5	1284.5	565.5
	1.916	1453.5	1289.5	563
	1.917	1460	1292.5	565.5
	1.918	1461	1296	557
	1.919	1461	1300	558
	1.92	1465.5	1304.5	554
	1.921	1468	1304.5	554
	1.922	1466.5	1311.5	555
	1.923	1468.5	1313	551.5
	1.924	1468.5	1316	547.5
	1.925	1472.5	1319.5	544
	1.926	1471.5	1325	545.5
	1.927	1468.5	1324	546
	1.928	1473	1328	545.5
	1.929	1474	1332	545.5
	1.93	1476.5	1331.5	543
	1.931	1472.5	1336	541
	1.932	1468.5	1339	539.5
	1.933	1473	1340	538
	1.934	1468.5	1345	535.5
	1.935	1473	1346.5	534
	1.936	1472.5	1349	535.5
	1.937	1468.5	1356.5	533.5
	1.938	1472	1354.5	531
	1.939	1473	1359.5	532
	1.94	1468.5	1360.5	531.5
	1.941	1468.5	1361	531.5
	1.942	1463.5	1364	527.5
	1.943	1466.5	1368.5	525.5
	1.944	1468	1370.5	526.5
	1.945	1463.5	1374.5	524
	1.946	1459.5	1373.5	522
	1.947	1458	1377	521
	1.948	1458	1378	523.5
	1.949	1456.5	1379	519.5
	1.95	1453.5	1382.5	517.5
	1.951	1450	1382.5	517
	1.952	1451.5	1382	516.5
	1.953	1451	1383	512
	1.954	1446	1386.5	514
	1.955	1445.5	1388	512
	1.956	1438.5	1390.5	508
	1.957	1444.5	1390.5	506
	1.958	1436.5	1393	506
	1.959	1432.5	1394	506
	1.96	1433	1392.5	501.5
	1.961	1423.5	1397.5	500
	1.962	1423.5	1394	502.5
	1.963	1420.5	1398	497.5
	1.964	1422	1398.5	493.5
	1.965	1420	1402	492.5
	1.966	1416	1403	492
	1.967	1415.5	1406	489.5
	1.968	1411.5	1403.5	487
	1.969	1406	1403.5	484.5
	1.97	1406	1403.5	481.5
	1.971	1401.5	1402.5	482
	1.972	1400.5	1403	479.5
	1.973	1401.5	1404	477
	1.974	1394	1406	478.5
	1.975	1399.5	1402.5	472.5
	1.976	1394	1401	471
	1.977	1394	1399.5	468.5
	1.978	1391	1404	463
	1.979	1390	1405	461
	1.98	1383.5	1400.5	456
	1.981	1384.5	1401.5	458
	1.982	1383	1398.5	456
	1.983	1384	1401.5	454
	1.984	1381.5	1400.5	454
	1.985	1381.5	1401.5	446
	1.986	1376.5	1398.5	448.5
	1.987	1375.5	1394	439.5
	1.988	1371.5	1403.5	440.5
	1.989	1370.5	1398.5	438.5
	1.99	1369	1400.5	436
	1.991	1364	1397	433
	1.992	1364	1398.5	428
	1.993	1360.5	1394	427
[truncated: 13,006 more rows]

## Sheet: F
DataTypeVer2.0	Time	Fz	Fz	Fz
NumberOfData		7000	7000	7000
PreTriggerData		0	0	0
SamplingTime[ms]		1	1	1
DataLabel		B1:CMJ	B2:CMJ	B3:CMJ
DataUnit	sec	N	N	N
	0	611	602	613.5
	0.001	604.5	602.5	614
	0.002	607.5	605.5	617
	0.003	609	603.5	615.5
	0.004	605.5	602.5	612.5
	0.005	608.5	605	615.5
	0.006	605.5	602	615.5
	0.007	606.5	601.5	613.5
	0.008	605	602.5	613
	0.009	604	603.5	614.5
	0.01	607	600.5	615
	0.011	608.5	599	615
	0.012	610.5	600.5	615
	0.013	608	599	616
	0.014	609	598.5	613.5
	0.015	612	600.5	614.5
	0.016	608	600.5	612.5
	0.017	610	601.5	615.5
	0.018	613	597.5	616.5
	0.019	609	598.5	615.5
	0.02	611	601	613.5
	0.021	608.5	601.5	612
	0.022	607.5	598	615.5
	0.023	612.5	594	615.5
	0.024	610.5	601.5	612.5
	0.025	611	593.5	615.5
	0.026	611.5	598	610.5
	0.027	613	596	614.5
	0.028	615	600.5	612.5
	0.029	611	596	615.5
	0.03	614.5	594	612.5
	0.031	613	599.5	611
	0.032	612	600.5	611
	0.033	613	596.5	614
	0.034	612	599	613.5
	0.035	615.5	597	615.5
	0.036	618.5	598.5	614.5
	0.037	615.5	599	613
	0.038	615.5	599	613
	0.039	619	598	612.5
	0.04	615.5	599	612
	0.041	618.5	601.5	612
	0.042	617	601	610
	0.043	618	598.5	610.5
	0.044	618.5	601	611.5
	0.045	616.5	606.5	608
	0.046	617	601	610
	0.047	622	601.5	611.5
	0.048	620	605.5	611
	0.049	624	601.5	612.5
	0.05	620.5	606	610
	0.051	622	605	609
	0.052	619	605.5	610
	0.053	623	604.5	608
	0.054	622	607.5	608.5
	0.055	622	608.5	611
	0.056	622	603.5	609.5
	0.057	622	609	611.5
	0.058	618	610	611.5
	0.059	622	608.5	606
	0.06	622	612.5	608
	0.061	623.5	610.5	610.5
	0.062	620.5	611	608
	0.063	624	612.5	609
	0.064	621	612.5	608.5
	0.065	621.5	614	611
	0.066	623	616.5	606.5
	0.067	624	615.5	606.5
	0.068	620.5	613.5	610
	0.069	623	616.5	608.5
	0.07	624	618.5	610
	0.071	623	618	608
	0.072	621.5	619	610.5
	0.073	621	618	610
	0.074	624	623	606
	0.075	624.5	622	609.5
	0.076	624	622	611
	0.077	625.5	622.5	607.5
	0.078	624	621.5	607
	0.079	624.5	620	606.5
	0.08	622.5	623.5	611
	0.081	621.5	624	609
	0.082	620	622.5	608.5
	0.083	620	623.5	608
	0.084	625	626	608
	0.085	625.5	623.5	609
	0.086	621	621	610
	0.087	624	626	611.5
	0.088	621	626	606
	0.089	617	628.5	611.5
	0.09	622	626	610.5
	0.091	623	623.5	608
	0.092	620	625	608
	0.093	618	627.5	611.5
	0.094	622	628	610.5
	0.095	618.5	627.5	608
	0.096	621	628	608.5
	0.097	617.5	624	614.5
	0.098	619	628	611
	0.099	620.5	628	609.5
	0.1	621	627	613.5
	0.101	617.5	624.5	611
	0.102	617.5	627	608
	0.103	615.5	626	613
	0.104	617	626	613.5
	0.105	612.5	624.5	614.5
	0.106	616	628	611.5
	0.107	621.5	626	612.5
	0.108	618.5	621.5	611.5
	0.109	612.5	624	615.5
	0.11	617.5	624.5	614.5
	0.111	615.5	625	614
	0.112	615.5	622	613
	0.113	611	623	612
	0.114	616.5	619.5	612
	0.115	611.5	625	615.5
	0.116	614.5	622	612.5
	0.117	615	620	614
	0.118	612.5	617.5	613.5
	0.119	610.5	618.5	614.5
	0.12	616.5	619	614.5
	0.121	613.5	618.5	619
	0.122	608.5	618.5	611.5
	0.123	614.5	617.5	614.5
	0.124	612.5	616	611
	0.125	610	615.5	613.5
	0.126	610.5	613	613.5
	0.127	611	615.5	617
	0.128	607.5	613.5	611
	0.129	609.5	612.5	613
	0.13	611.5	614	613
	0.131	609	615.5	613.5
	0.132	610.5	610.5	610
	0.133	611	611.5	613.5
	0.134	608.5	613	611.5
	0.135	612.5	611	612
	0.136	608.5	609	612
	0.137	607.5	609	613
	0.138	609	606.5	613.5
	0.139	607	611	613
	0.14	608.5	613.5	611.5
	0.141	608.5	610.5	610.5
	0.142	609	608.5	611.5
	0.143	609	607.5	615.5
	0.144	608.5	606	610.5
	0.145	607	607.5	614
	0.146	604.5	607.5	613.5
	0.147	606.5	608.5	609.5
	0.148	608.5	608.5	613.5
	0.149	609	612.5	611.5
	0.15	606.5	606	611
	0.151	606.5	607.5	611
	0.152	607.5	607	608
	0.153	609	606	608.5
	0.154	605	610	610
	0.155	604	604.5	611.5
	0.156	606	607	608
	0.157	604	608.5	609
	0.158	605	608.5	613
	0.159	603.5	606.5	608.5
	0.16	605.5	607.5	608
	0.161	605.5	609	611.5
	0.162	605.5	605.5	609.5
	0.163	608.5	605.5	610
	0.164	602.5	608	609
	0.165	603	608.5	608.5
	0.166	608	606.5	608.5
	0.167	603	605.5	608
	0.168	607.5	609	607.5
	0.169	605	609	604.5
	0.17	607.5	610	608.5
	0.171	604	607	611
	0.172	608	607.5	608
	0.173	603.5	605	608.5
	0.174	605	606.5	612
	0.175	604.5	607.5	608.5
	0.176	605	612	608
	0.177	607.5	612	606.5
	0.178	607.5	608.5	608
	0.179	607.5	608.5	608.5
	0.18	607.5	611	608.5
	0.181	601	611	608
	0.182	603	607.5	604
	0.183	607.5	609	608
	0.184	603.5	612.5	608
	0.185	602.5	611	608
	0.186	601	608.5	607
	0.187	602.5	607.5	608
	0.188	605.5	607	607.5
	0.189	602.5	612	609
	0.19	604	611.5	607
	0.191	607.5	607.5	609
	0.192	605	609.5	607
	0.193	602	606.5	606.5
	0.194	602.5	609.5	605
	0.195	606.5	607.5	608
	0.196	606	607.5	610
	0.197	603	612	608
	0.198	606	608.5	608
	0.199	605.5	609	606.5
	0.2	603	613	609
	0.201	607	611	610
	0.202	603	608.5	608
	0.203	605	607	608.5
	0.204	605.5	610.5	605.5
	0.205	605.5	607.5	610.5
	0.206	606	611	607
	0.207	604.5	609	609
	0.208	605	607.5	606
	0.209	601	607.5	605.5
	0.21	607	609	610.5
	0.211	605	605	607.5
	0.212	602	609	607.5
	0.213	609	605.5	610
	0.214	609	606.5	613.5
	0.215	606.5	606	607
	0.216	608.5	605.5	607
	0.217	605	606.5	608.5
	0.218	608.5	607.5	611
	0.219	606	608	608.5
	0.22	606.5	606	604
	0.221	608	605	610.5
	0.222	606.5	604.5	605
	0.223	608.5	604.5	608
	0.224	609	605.5	608.5
	0.225	607	603.5	608
	0.226	607	601.5	605.5
	0.227	609	607	607
	0.228	608.5	606	606.5
	0.229	607.5	607.5	609.5
	0.23	607.5	605	608.5
	0.231	612	606	607
	0.232	612.5	603	608
	0.233	609	603.5	606
	0.234	610.5	605.5	608.5
	0.235	611.5	604.5	605.5
	0.236	609	607	604
	0.237	609	607.5	605
	0.238	607.5	603.5	608
	0.239	614.5	607	608
	0.24	618	603.5	606.5
	0.241	613	608	607
	0.242	609.5	607.5	608.5
	0.243	613	606.5	607.5
	0.244	614.5	608.5	608
	0.245	611	604.5	608.5
	0.246	613	607	607.5
	0.247	612	609.5	610.5
	0.248	611	605.5	609.5
	0.249	613	606.5	608.5
	0.25	616.5	609	607.5
	0.251	613	609	608.5
	0.252	614.5	608.5	608.5
	0.253	612.5	610.5	608.5
	0.254	614	609.5	611.5
	0.255	613	608.5	611
	0.256	613.5	609.5	610.5
	0.257	612	614	612
	0.258	613	613.5	611
	0.259	612.5	613.5	611.5
	0.26	612.5	614	611.5
	0.261	611	615.5	611.5
	0.262	613	615.5	614
	0.263	612	614	614.5
	0.264	609	611	611.5
	0.265	609.5	615.5	615.5
	0.266	612	615.5	613.5
	0.267	615.5	614	610
	0.268	612	613.5	608.5
	0.269	615.5	617	611
	0.27	614.5	619	614.5
	0.271	611.5	616	611.5
	0.272	611.5	615.5	614.5
	0.273	609.5	618	610.5
	0.274	610	619	612.5
	0.275	610.5	620.5	612.5
	0.276	610	620	614.5
	0.277	609.5	617.5	615.5
	0.278	613	620.5	613.5
	0.279	613.5	620.5	610.5
	0.28	612.5	623	614.5
	0.281	612	622	611.5
	0.282	612.5	623	614.5
	0.283	612	619.5	608
	0.284	614.5	622.5	611.5
	0.285	610.5	621	611.5
	0.286	612.5	621.5	614.5
	0.287	613	622	614
	0.288	610.5	622.5	611
	0.289	613	621	611
	0.29	614.5	622	614
	0.291	612	620	615.5
	0.292	611	623	611.5
	0.293	613	620.5	613.5
	0.294	615	622	613.5
	0.295	612.5	619.5	613
	0.296	614.5	621.5	608
	0.297	609	618.5	614.5
	0.298	609	619.5	612.5
	0.299	610.5	616.5	611.5
	0.3	611	620	613
	0.301	610	617	613.5
	0.302	611.5	617	614.5
	0.303	609	618	612.5
	0.304	610	617.5	609.5
	0.305	608.5	613	614
	0.306	612.5	616	617.5
	0.307	609	612.5	609.5
	0.308	615	611.5	612
	0.309	610	614.5	612.5
	0.31	611	613	614.5
	0.311	615.5	612.5	612.5
	0.312	612	612.5	614
	0.313	613	611.5	610.5
	0.314	611.5	611	610.5
	0.315	615.5	607	612
	0.316	613	607.5	615.5
	0.317	611	607.5	614
	0.318	613.5	608.5	613
	0.319	610.5	603.5	612.5
	0.32	612	607.5	614.5
	0.321	611	604.5	615.5
	0.322	611	605	613
	0.323	609	603.5	616
	0.324	609.5	606.5	615.5
	0.325	611.5	604.5	619
	0.326	608.5	605	616.5
	0.327	613	601.5	614.5
	0.328	611	607.5	614.5
	0.329	613	603.5	616.5
	0.33	608.5	603.5	615.5
	0.331	609	601.5	613
	0.332	610.5	602	620
	0.333	612.5	601	616
	0.334	610.5	603	618
	0.335	612	601.5	619
	0.336	613.5	598.5	615.5
	0.337	613	601.5	615.5
	0.338	611.5	604	615.5
	0.339	613	600.5	615.5
	0.34	613	601	615.5
	0.341	612.5	598.5	619
	0.342	609	598.5	619
	0.343	612.5	596	618
	0.344	615	600.5	617.5
	0.345	611	599	615.5
	0.346	610.5	601	619
	0.347	607.5	599	614.5
	0.348	609	601.5	615.5
	0.349	614	601.5	618.5
	0.35	610.5	598.5	613.5
	0.351	613	603	615
	0.352	613.5	601.5	616
	0.353	610	605	620.5
	0.354	608	601.5	616
	0.355	610	603	617
	0.356	608.5	601.5	616
	0.357	609	607	614.5
	0.358	608.5	601.5	615.5
	0.359	607.5	604	610
	0.36	608.5	599	614
	0.361	608.5	603.5	611.5
	0.362	608	602.5	615.5
	0.363	612.5	603.5	613.5
	0.364	608.5	602	613.5
	0.365	608.5	608.5	612
	0.366	608	602	613
	0.367	611	603	610
	0.368	609	604	613
	0.369	609.5	605	610.5
	0.37	611.5	606.5	608.5
	0.371	606	608.5	608
	0.372	607.5	606	610
	0.373	608	605.5	608
	0.374	605.5	609	606.5
	0.375	608.5	607.5	610
	0.376	606.5	609	609.5
	0.377	604	608.5	606
	0.378	608	607.5	608
	0.379	611	611	609
	0.38	609	608	609
	0.381	608	607	608
	0.382	609.5	609	606.5
	0.383	607.5	610	606.5
	0.384	605	607.5	608.5
	0.385	609.5	609	608
	0.386	608.5	612.5	606
	0.387	608	611	606.5
	0.388	607.5	614.5	606
	0.389	609	611	607.5
	0.39	608.5	613	603
	0.391	608.5	610.5	607.5
	0.392	608.5	608.5	607.5
	0.393	610.5	609	610
	0.394	609	614	608
	0.395	608.5	610	606.5
	0.396	608.5	613.5	606.5
	0.397	610.5	610	608
	0.398	610.5	611	608
	0.399	608	610.5	605
	0.4	610	610	607.5
	0.401	608.5	608	608
	0.402	608	611.5	603
	0.403	608	612.5	608.5
	0.404	607.5	613.5	609
	0.405	609	611	609.5
	0.406	612.5	609.5	607
	0.407	609	611.5	606
	0.408	611	612.5	606
	0.409	611.5	614.5	612
	0.41	609	611	609.5
	0.411	609.5	610.5	613.5
	0.412	611	614	609.5
	0.413	610.5	612.5	608
	0.414	611	610.5	611.5
	0.415	611.5	611.5	610.5
	0.416	608	609	609.5
	0.417	613	610	608.5
	0.418	611.5	607.5	611
	0.419	609	613	611
	0.42	608.5	609.5	606.5
	0.421	610.5	611.5	610
	0.422	610	609	608
	0.423	613	608.5	609.5
	0.424	613	610	608
	0.425	612	607	609
	0.426	614	604	609.5
	0.427	610.5	605.5	608.5
	0.428	613	606.5	613
	0.429	612	608.5	611.5
	0.43	612.5	608.5	608
	0.431	615	608.5	615.5
	0.432	609	609	614
	0.433	611.5	607.5	611.5
	0.434	614	608.5	611
	0.435	612.5	605	610.5
	0.436	609	608.5	611.5
	0.437	612.5	611	611
	0.438	613	608.5	613.5
	0.439	609	607	615.5
	0.44	614	607.5	611.5
	0.441	610.5	606	610
	0.442	612	608.5	610.5
	0.443	609	612	607.5
	0.444	612	610.5	613
	0.445	613	613	614.5
	0.446	611	611	611
	0.447	610.5	611.5	615.5
	0.448	612	609	611.5
	0.449	611	610	612.5
	0.45	615.5	612.5	611
	0.451	612.5	611	614
	0.452	612	613	611.5
	0.453	612	613.5	613.5
	0.454	613	615.5	614
	0.455	612	614.5	610
	0.456	612	618.5	609.5
	0.457	615.5	613	611.5
	0.458	611.5	614.5	611.5
	0.459	612.5	615	614.5
	0.46	613	617	613.5
	0.461	612.5	617	613.5
	0.462	612	615.5	613
	0.463	613	615.5	615
	0.464	612.5	617.5	611
	0.465	613	618	614.5
	0.466	614.5	617.5	613
	0.467	613.5	616	611.5
	0.468	616.5	619.5	610.5
	0.469	612.5	621.5	614
	0.47	615	622	613.5
	0.471	613.5	622	609
	0.472	612	622	611
	0.473	611	618.5	611
	0.474	612.5	622	611.5
	0.475	612.5	621	611.5
	0.476	611.5	622.5	611.5
	0.477	615.5	623	610
	0.478	614.5	621	614
	0.479	618.5	623.5	608.5
	0.48	615	627.5	612.5
	0.481	614	623	611
	0.482	611	621	611
	0.483	611.5	621.5	613.5
	0.484	613.5	622	611
	0.485	610	625	610
	0.486	612	624	611
	0.487	615.5	624.5	614
	0.488	611	622	611.5
	0.489	605	625	608
	0.49	609.5	621.5	609.5
	0.491	612.5	624	609.5
	0.492	611	624.5	611.5
	0.493	612	626	608
	0.494	612.5	623.5	610.5
	0.495	612	625.5	608
	0.496	611	620.5	610.5
	0.497	609	623	607.5
	0.498	611	617.5	608
	0.499	613	623	607
	0.5	609	623	612.5
	0.501	610.5	621	610.5
	0.502	608	619.5	607.5
	0.503	605.5	618.5	608.5
	0.504	608.5	621.5	608.5
	0.505	611	620.5	608
	0.506	609	621.5	606.5
	0.507	610	620	608
	0.508	608.5	616.5	608.5
	0.509	607.5	622	608
	0.51	609	613.5	607
	0.511	608.5	616.5	608.5
	0.512	608.5	616.5	606
	0.513	609	617	604
	0.514	615	618	607.5
	0.515	608.5	617.5	607.5
	0.516	611	617	610
	0.517	612	615.5	608
	0.518	608.5	615	604.5
	0.519	612	615.5	609.5
	0.52	609	614	611
	0.521	612.5	614.5	608
	0.522	610	616.5	611.5
	0.523	612	612	608.5
	0.524	608.5	615.5	607.5
	0.525	611	613.5	611
	0.526	611	610.5	608
	0.527	609	611	608
	0.528	613	609.5	609.5
	0.529	612.5	612.5	609
	0.53	610	610.5	609
	0.531	613.5	612.5	608.5
	0.532	610.5	609	610
	0.533	609	613.5	612
	0.534	617	609.5	610
	0.535	613.5	609	608.5
	0.536	615.5	610	612
	0.537	615	608	610
	0.538	613	607	608
	0.539	615.5	608.5	607
	0.54	615.5	608.5	611
	0.541	615	609.5	609.5
	0.542	615.5	609.5	608
	0.543	616.5	610.5	612
	0.544	611.5	609	615.5
	0.545	614.5	607.5	611
	0.546	612.5	609	611.5
	0.547	615	608.5	609
	0.548	616.5	607.5	610
	0.549	615	609	615
	0.55	616	607.5	611
	0.551	615.5	607	608.5
	0.552	617	608	612
	0.553	618	607.5	608.5
	0.554	617.5	609.5	611
	0.555	620.5	608	609
	0.556	615.5	614	609
	0.557	616.5	609	610.5
	0.558	617.5	608.5	609
	0.559	619.5	607	612.5
	0.56	624.5	610	613
	0.561	620	612	608
	0.562	617	611.5	608
	0.563	617.5	610.5	608.5
	0.564	618	608	606
	0.565	619.5	610	607.5
	0.566	620	612	607.5
	0.567	618.5	614	604.5
	0.568	621.5	609.5	608.5
	0.569	619.5	614.5	607.5
	0.57	618.5	609.5	606.5
	0.571	625	612	604.5
	0.572	622.5	616	606
	0.573	618.5	612.5	606
	0.574	624.5	614.5	606
	0.575	622	612.5	606
	0.576	620.5	613.5	606
	0.577	623	617	604.5
	0.578	622.5	615.5	606
	0.579	626	614	605
	0.58	621	610.5	604
	0.581	622	613	603.5
	0.582	624.5	613	605.5
	0.583	621	615.5	604
	0.584	622	616.5	603.5
	0.585	625.5	615.5	607
	0.586	627.5	615.5	608
	0.587	623	616	606
	0.588	622	618	606
	0.589	622.5	620.5	606.5
	0.59	621.5	615.5	606.5
	0.591	624	616.5	603.5
	0.592	624	620	605
	0.593	622.5	616.5	605.5
	0.594	624	618	603.5
	0.595	620	619.5	609
	0.596	623	618.5	606.5
	0.597	621.5	618.5	607.5
	0.598	622	621	604.5
	0.599	623	620.5	606
	0.6	622.5	616	605
	0.601	621.5	615.5	609.5
	0.602	624	618	607.5
	0.603	620.5	622	606
	0.604	621.5	614	607.5
	0.605	620.5	618	608.5
	0.606	624	618.5	609.5
	0.607	622	616.5	610.5
	0.608	622	618.5	607.5
	0.609	621	615	609.5
	0.61	622.5	620.5	611
	0.611	617	615.5	604
	0.612	618	619	609
	0.613	622	617.5	611.5
	0.614	622	615.5	609
	0.615	618.5	618.5	609.5
	0.616	619	616.5	611.5
	0.617	619	615.5	611.5
	0.618	618.5	617.5	610
	0.619	617.5	613.5	613.5
	0.62	617	617.5	613.5
	0.621	619.5	618.5	612.5
	0.622	614.5	613.5	609.5
	0.623	615.5	612.5	611.5
	0.624	615	610.5	613.5
	0.625	615.5	613	610
	0.626	617	610.5	612
	0.627	617	614	610
	0.628	611.5	613.5	611.5
	0.629	611.5	612	608.5
	0.63	617.5	614	615
	0.631	614.5	615.5	612.5
	0.632	615	614	614
	0.633	614	612	613.5
	0.634	612.5	613	614.5
	0.635	615.5	614	612
	0.636	614.5	614.5	611.5
	0.637	608.5	615	612
	0.638	613	611	614.5
	0.639	611	610.5	614.5
	0.64	612.5	611.5	615.5
	0.641	614	613	613.5
	0.642	612	614	615.5
	0.643	612	613.5	615
	0.644	609.5	612.5	611.5
	0.645	612	611	614.5
	0.646	612	611	613.5
	0.647	613.5	613.5	615.5
	0.648	611	614	614.5
	0.649	613	612.5	614.5
	0.65	609	611.5	611.5
	0.651	609	613	612.5
	0.652	610	610.5	615.5
	0.653	613	614	611.5
	0.654	610	614	616.5
	0.655	609	613	608.5
	0.656	612	614	615.5
	0.657	612.5	615	615
	0.658	610	611	611.5
	0.659	609	614	614.5
	0.66	610.5	612	614
	0.661	611	613	613.5
	0.662	607.5	616.5	613.5
	0.663	613	615.5	615
	0.664	611.5	614.5	614
	0.665	611	615.5	615.5
	0.666	610	613.5	615
	0.667	612.5	614	614
	0.668	610.5	615.5	616
	0.669	609	616	614
	0.67	610	615.5	615
	0.671	611	617.5	616
	0.672	608.5	615.5	615
	0.673	609	616	612
	0.674	609	614.5	617
	0.675	608.5	613	610.5
	0.676	614	615.5	613.5
	0.677	612.5	616	614.5
	0.678	614	616	616
	0.679	609	618.5	615
	0.68	609	611.5	611
	0.681	615.5	615.5	612
	0.682	609	615.5	615.5
	0.683	610	611.5	614
	0.684	613	611	613.5
	0.685	608	613.5	613
	0.686	611.5	611.5	615.5
	0.687	611	615	613.5
	0.688	610	613	613
	0.689	612.5	614	614.5
	0.69	615.5	614	613.5
	0.691	614.5	614	616
	0.692	609	611	616
	0.693	609	611.5	615
	0.694	612	610.5	609.5
	0.695	613	610	615.5
	0.696	615.5	609	610.5
	0.697	615.5	614	615.5
	0.698	613.5	613	613
	0.699	613.5	616.5	615.5
	0.7	613.5	610.5	615
	0.701	612	609	615.5
	0.702	615.5	609	615
	0.703	614.5	611.5	614
	0.704	617	609.5	613.5
	0.705	614	608.5	617
	0.706	614.5	611	615.5
	0.707	614	611	617
	0.708	615.5	607.5	616
	0.709	618	609	613.5
	0.71	616	608.5	615
	0.711	615.5	608.5	613.5
	0.712	615.5	607	618
	0.713	618.5	608.5	615.5
	0.714	615.5	608.5	613.5
	0.715	618.5	608.5	614
	0.716	615.5	608.5	613.5
	0.717	619.5	612.5	615.5
	0.718	615.5	603.5	614
	0.719	617.5	608.5	616
	0.72	617.5	609	614
	0.721	617.5	606.5	614
	0.722	619	607.5	614.5
	0.723	618	606	614.5
	0.724	618	604	614.5
	0.725	617	606.5	611.5
	0.726	615.5	607.5	615.5
	0.727	618.5	605	615
	0.728	615.5	605	614
	0.729	615	606.5	614.5
	0.73	615.5	602	614.5
	0.731	616	603.5	616.5
	0.732	618	602.5	616.5
	0.733	613.5	606	613.5
	0.734	615	605	619.5
	0.735	616	605	614
	0.736	615	607.5	611.5
	0.737	615.5	602.5	615.5
	0.738	611.5	602.5	614.5
	0.739	614.5	600.5	614
	0.74	612.5	598.5	614
	0.741	615.5	599	617
	0.742	615.5	601.5	614.5
	0.743	613	601	613
	0.744	611	602	614
	0.745	618.5	600.5	613.5
	0.746	617.5	602	613
	0.747	614	600.5	614
	0.748	615.5	600.5	612.5
	0.749	615	602	612.5
	0.75	615.5	602.5	612.5
	0.751	610.5	601	613.5
	0.752	613	599	608.5
	0.753	612.5	599	612.5
	0.754	611.5	601.5	614
	0.755	612	598.5	609.5
	0.756	609	601.5	609
	0.757	612.5	600.5	613.5
	0.758	613	599	609
	0.759	616	605	611.5
	0.76	612	599	608.5
	0.761	612	599	608
	0.762	613.5	599	610.5
	0.763	610	602.5	609
	0.764	613.5	602	608
	0.765	611.5	601.5	608
	0.766	610	601	608
	0.767	611.5	602.5	607
	0.768	611	601.5	608
	0.769	610	602	608
	0.77	609	602.5	607.5
	0.771	612.5	602.5	608
	0.772	610	602.5	606.5
	0.773	612	603	604
	0.774	613	603.5	610
	0.775	611.5	605	605.5
	0.776	613.5	606	609
	0.777	615	607	605
	0.778	612	607.5	607
	0.779	613.5	606	608.5
	0.78	614.5	605.5	608
	0.781	612.5	607	607
	0.782	614	611	605.5
	0.783	616.5	607.5	606.5
	0.784	617	607.5	607.5
	0.785	615	611	605
	0.786	614.5	604.5	608
	0.787	614	603.5	606
	0.788	617	612.5	611
	0.789	618	607.5	606
	0.79	615	607.5	607.5
	0.791	615	609	607.5
	0.792	616	609	608.5
	0.793	615.5	609.5	606
	0.794	615.5	613	608
	0.795	617	609.5	608
	0.796	615	610	606
	0.797	613	610.5	609.5
	0.798	616	611	608.5
	0.799	620.5	612.5	609
	0.8	620	610.5	610
	0.801	617	612.5	611.5
	0.802	617	611	611
	0.803	619.5	610.5	609
	0.804	613.5	614	611.5
	0.805	617	611	607.5
	0.806	621.5	616.5	610.5
	0.807	618.5	615.5	612
	0.808	617.5	615	610.5
	0.809	616	614	608
	0.81	618	617	612.5
	0.811	615.5	613	614.5
	0.812	615	616.5	612.5
	0.813	611	615.5	612.5
	0.814	618	620.5	614.5
	0.815	616	619	614.5
	0.816	617.5	616	611
	0.817	615.5	614.5	610
	0.818	617.5	617	611.5
	0.819	619.5	613	611
	0.82	619	620.5	614
	0.821	617.5	615.5	615.5
	0.822	618	618	614
	0.823	618	616	610
	0.824	614.5	619	613.5
	0.825	615	619.5	611.5
	0.826	614.5	618.5	616.5
	0.827	612	618.5	615
	0.828	615.5	620.5	614
	0.829	615	619.5	611
	0.83	615	623	615
	0.831	614	620	613
	0.832	616.5	621	614
	0.833	613	618	611.5
	0.834	612.5	617	612.5
	0.835	611	620	615.5
	0.836	615	620	615.5
	0.837	615.5	620.5	615.5
	0.838	613	617.5	613
	0.839	614.5	619	615.5
	0.84	611.5	623.5	615
	0.841	615.5	622.5	614.5
	0.842	612.5	622.5	614.5
	0.843	615.5	623	611
	0.844	612.5	621	614.5
	0.845	614.5	620	613
	0.846	609	621.5	614
	0.847	613	620.5	616.5
	0.848	615.5	621	615.5
	0.849	610	620	613.5
	0.85	613.5	618.5	613.5
	0.851	615.5	617	614
	0.852	614	620	613.5
	0.853	612.5	615.5	615.5
	0.854	611	619	611.5
	0.855	613.5	617.5	616
	0.856	609	619.5	613
	0.857	612	620	612
	0.858	608	618	615.5
	0.859	606.5	614.5	613.5
	0.86	612	617	614.5
	0.861	607.5	618.5	611
	0.862	612.5	615.5	612
	0.863	612	613.5	614.5
	0.864	610	615.5	610.5
	0.865	606	614	612.5
	0.866	608.5	622	615.5
	0.867	609	614	610.5
	0.868	608.5	615.5	612.5
	0.869	609	614	611.5
	0.87	610	615.5	611.5
	0.871	610	614	613
	0.872	610.5	613	613.5
	0.873	606.5	611	611.5
	0.874	608.5	614	612
	0.875	607.5	609.5	614
	0.876	611	612	611
	0.877	611	611.5	615.5
	0.878	610	611	614
	0.879	609.5	614	614.5
	0.88	611.5	609	614
	0.881	609.5	611	614
	0.882	610	611	609.5
	0.883	612.5	612.5	612
	0.884	610	608.5	611
	0.885	609	610	613
	0.886	611	610.5	618.5
	0.887	607.5	609.5	611
	0.888	613	611.5	616
	0.889	611	610.5	613
	0.89	611	608.5	615
	0.891	615.5	609.5	615.5
	0.892	609	608.5	611
	0.893	610.5	608.5	613.5
	0.894	612.5	605.5	610
	0.895	609	608.5	613.5
	0.896	611.5	608	615.5
	0.897	612	607	612.5
	0.898	609	608.5	613
	0.899	610	607	612
	0.9	608.5	606.5	616
	0.901	611	605.5	617
	0.902	611	608.5	612.5
	0.903	614	605.5	617.5
	0.904	611.5	602.5	618
	0.905	613	606.5	615.5
	0.906	609.5	603	614.5
	0.907	611.5	606	617.5
	0.908	608.5	607	616
	0.909	609	601.5	615.5
	0.91	612.5	604	617
	0.911	610.5	605.5	618
	0.912	609	603.5	617
	0.913	612	604.5	615.5
	0.914	610	605	616
	0.915	604.5	607	617.5
	0.916	609	603	618
	0.917	608.5	604	618
	0.918	611	604	618
	0.919	614	605	619
	0.92	610.5	603	617
	0.921	606	600.5	618
	0.922	611	601.5	621.5
	0.923	608.5	602	621.5
	0.924	612	606	617.5
	0.925	608.5	607.5	618.5
	0.926	610.5	607.5	619.5
	0.927	612.5	601	615.5
	0.928	612	604.5	620.5
	0.929	611	602.5	620
	0.93	608.5	605	620.5
	0.931	612	603.5	618
	0.932	609	605.5	624.5
	0.933	614	605.5	621
	0.934	610.5	605.5	621
	0.935	611.5	606	619
	0.936	610.5	607.5	622
	0.937	610	604	619.5
	0.938	609	609	621.5
	0.939	608.5	608.5	621
	0.94	611	605.5	620
	0.941	611	606	619
	0.942	612	606	617.5
	0.943	610.5	607	619.5
	0.944	610	607	621
	0.945	611.5	605	618.5
	0.946	610	607	619.5
	0.947	610	610.5	618
	0.948	612.5	609	618.5
	0.949	609	604.5	622.5
	0.95	613	612	617.5
	0.951	608.5	612	615.5
	0.952	612.5	608.5	617
	0.953	609	609.5	617
	0.954	610.5	609.5	613.5
	0.955	607.5	610.5	616.5
	0.956	607.5	607.5	618.5
	0.957	612	608.5	619.5
	0.958	609	609.5	616
	0.959	609	608.5	614.5
	0.96	610	614.5	613.5
	0.961	610	610.5	616
	0.962	611	609	612.5
	0.963	607.5	613.5	617
	0.964	609.5	612.5	615
	0.965	611.5	614	611
	0.966	608.5	613	614
	0.967	609	613	613
	0.968	613	612	611.5
	0.969	608.5	611.5	613.5
	0.97	609.5	610.5	611
	0.971	608.5	610	613.5
	0.972	613	611.5	608.5
	0.973	609	611	609
	0.974	610.5	613	610.5
	0.975	611	613	608.5
	0.976	612	611	612
	0.977	610	609.5	611
	0.978	609	613.5	609
	0.979	609	613.5	608
	0.98	609	611	611
	0.981	612.5	614.5	608
	0.982	614.5	611	609.5
	0.983	610	612.5	607
	0.984	612.5	614	606
	0.985	611.5	612.5	603.5
	0.986	612.5	616	609.5
	0.987	613.5	611	608
	0.988	612	614	606
	0.989	613	611.5	608
	0.99	615.5	612.5	607
	0.991	614.5	614	608
	0.992	612	612.5	608.5
	0.993	613	614.5	606
	0.994	618.5	614	605
	0.995	617	616	603.5
	0.996	617	615.5	605
	0.997	618	613	601.5
	0.998	615	615.5	605
	0.999	612.5	615.5	606.5
	1	617	615	604.5
	1.001	615.5	616	606.5
	1.002	615.5	614	606.5
	1.003	617.5	615.5	603
	1.004	618	616.5	609.5
	1.005	619.5	613.5	606.5
	1.006	616.5	616.5	607
	1.007	617	617	607.5
	1.008	621	616.5	607
	1.009	618.5	616	601.5
	1.01	615.5	616	608
	1.011	617.5	615.5	607.5
	1.012	621	614	608.5
	1.013	619.5	622	607.5
	1.014	616	616	606
	1.015	615.5	618	608
	1.016	617.5	617.5	607.5
	1.017	619.5	615	605
	1.018	615.5	615.5	603.5
	1.019	620	619	608.5
	1.02	615.5	617	608
	1.021	618	616	610.5
	1.022	618.5	619	607
	1.023	616.5	620.5	610
	1.024	618.5	616.5	608
	1.025	616	619.5	607.5
	1.026	621	617	610.5
	1.027	615	615.5	611
	1.028	613.5	621	607
	1.029	615.5	619.5	609.5
	1.03	617	616.5	611
	1.031	615.5	620.5	612.5
	1.032	615	620.5	612.5
	1.033	615.5	618.5	611
	1.034	616.5	620	608
	1.035	619	624	611
	1.036	613.5	624	610
	1.037	617	619.5	610
	1.038	613	622.5	614.5
	1.039	611.5	622	613.5
	1.04	615.5	622	613
	1.041	613	621.5	611.5
	1.042	614.5	622	612.5
	1.043	611.5	623.5	612.5
	1.044	615.5	624.5	611
	1.045	614.5	622	612.5
	1.046	614.5	621.5	615.5
	1.047	613	624.5	614
	1.048	614	622.5	611.5
	1.049	611.5	622.5	613.5
	1.05	615.5	621.5	613
	1.051	611	622.5	608
	1.052	615	621.5	610.5
	1.053	615.5	620.5	612
	1.054	613	621.5	612
	1.055	611.5	622	615.5
	1.056	613.5	620.5	615.5
	1.057	613.5	617.5	617
	1.058	614	619	616.5
	1.059	613	617	615.5
	1.06	612	616.5	615.5
	1.061	615	619	611
	1.062	610.5	620	613.5
	1.063	614.5	618.5	613.5
	1.064	615	619.5	614.5
	1.065	612.5	621	614.5
	1.066	616	617.5	616
	1.067	614	616.5	613
	1.068	614.5	620	613.5
	1.069	615.5	621	619
	1.07	615.5	618.5	615.5
	1.071	611.5	617.5	615
	1.072	613	619	611.5
	1.073	612.5	615.5	611.5
	1.074	612.5	618.5	615.5
	1.075	615.5	615.5	614
	1.076	615	614	610.5
	1.077	615	615	611.5
	1.078	614	613	611
	1.079	615	615.5	615.5
	1.08	613	616.5	614
	1.081	617.5	615.5	611.5
	1.082	615.5	613.5	611.5
	1.083	616.5	611	608.5
	1.084	616.5	612	608.5
	1.085	618	611.5	608
	1.086	618.5	615.5	611
	1.087	617	610.5	607
	1.088	618	610	608.5
	1.089	616.5	609	606.5
	1.09	614.5	611.5	610
	1.091	617.5	610	607.5
	1.092	619.5	611	610.5
	1.093	618.5	613	608.5
	1.094	618	610.5	609
	1.095	615.5	609.5	607
	1.096	617	609.5	607.5
	1.097	616	608.5	607.5
	1.098	617	607.5	608
	1.099	613.5	609.5	608
	1.1	620.5	607.5	608
	1.101	618	611	606.5
	1.102	615	607.5	608
	1.103	617.5	609	607
	1.104	619.5	604	607
	1.105	615.5	607.5	602.5
	1.106	620	606.5	606
	1.107	617	608	605.5
	1.108	618.5	610	607
	1.109	615	604.5	606
	1.11	616	606	607
	1.111	618.5	605	604
	1.112	615	605.5	604.5
	1.113	615.5	605.5	606
	1.114	616	605.5	606
	1.115	614	602.5	607.5
	1.116	614.5	603.5	606
	1.117	615.5	604	606
	1.118	615	607	603.5
	1.119	615.5	605.5	606
	1.12	610.5	608.5	603.5
	1.121	615	605.5	606.5
	1.122	613.5	604	604
	1.123	613.5	607.5	604
	1.124	613	605.5	607
	1.125	613	605.5	608
	1.126	612.5	607.5	603
	1.127	616.5	609.5	608
	1.128	615	609	608.5
	1.129	617	608.5	607
	1.13	611.5	606	609
	1.131	615	607.5	606.5
	1.132	613	609	606
	1.133	610.5	610.5	608.5
	1.134	611.5	606.5	609
	1.135	614	607.5	610.5
	1.136	610.5	611.5	605.5
	1.137	615.5	610	609.5
	1.138	615.5	611	609.5
	1.139	611.5	613	611
	1.14	611.5	613.5	608.5
	1.141	615	609	611
	1.142	615.5	612.5	611
	1.143	614	611	610.5
	1.144	612.5	613	613
	1.145	612	612.5	608.5
	1.146	609	614	614
	1.147	612	611	608.5
	1.148	615	613	612.5
	1.149	614.5	612.5	607.5
	1.15	613	615.5	609
	1.151	611	618	610.5
	1.152	613	615.5	610.5
	1.153	611	616	611.5
	1.154	612.5	618.5	614
	1.155	613.5	619	611
	1.156	614.5	621.5	611.5
	1.157	616.5	615.5	612
	1.158	615.5	614	611
	1.159	615.5	619.5	610
	1.16	613	618	609.5
	1.161	610	619	608.5
	1.162	612	620.5	611.5
	1.163	612.5	616.5	610.5
	1.164	612.5	619	613
	1.165	616	619.5	610.5
	1.166	615.5	618.5	609
	1.167	615.5	615.5	608
	1.168	615.5	619.5	610
	1.169	614	615.5	609.5
	1.17	614	619	611
	1.171	614	616.5	607.5
	1.172	615.5	618.5	609.5
	1.173	616	615.5	611
	1.174	614.5	619	607
	1.175	611	619.5	610
	1.176	617	615.5	610
	1.177	612	617.5	607
	1.178	617.5	617	607
	1.179	615.5	612.5	608.5
	1.18	613	619	609.5
	1.181	616.5	612.5	602.5
	1.182	617.5	612	605.5
	1.183	611	612	610
	1.184	614.5	615.5	606
	1.185	618	611.5	605.5
	1.186	614	611.5	605
	1.187	612.5	610.5	606.5
	1.188	614	607.5	604.5
	1.189	617	608.5	606
	1.19	615.5	608	605.5
	1.191	614	608.5	604
	1.192	614.5	610	606
	1.193	615.5	608.5	608.5
	1.194	614.5	608.5	606
	1.195	613	606	605.5
	1.196	612	603	602.5
	1.197	616	604.5	606
	1.198	610.5	602.5	601
	1.199	615	602.5	608.5
	1.2	614	602.5	602
	1.201	612	602	607
	1.202	613.5	603	604
	1.203	610.5	603.5	606.5
	1.204	611	601	603
	1.205	612	598.5	604
	1.206	613	598.5	602.5
	1.207	612.5	600.5	608
	1.208	615.5	601.5	602
	1.209	612	600.5	607
	1.21	613	598	606
	1.211	609	601.5	604.5
	1.212	612	601.5	603.5
	1.213	609	600.5	608
	1.214	610	602	605
	1.215	611.5	603.5	606.5
	1.216	608.5	602.5	607
	1.217	610	602.5	609
	1.218	607.5	601.5	604
	1.219	611.5	603.5	608
	1.22	610.5	604.5	605
	1.221	609	604.5	608
	1.222	613	606	608
	1.223	608.5	608.5	604.5
	1.224	612.5	607.5	608
	1.225	609	609	607.5
	1.226	612	608.5	607
	1.227	611.5	611	607.5
	1.228	609	610.5	607.5
	1.229	614.5	613	609.5
	1.23	611	614	606
	1.231	611	614	610
	1.232	610.5	611.5	608.5
	1.233	612.5	616.5	610
	1.234	609	618.5	607
	1.235	609	615.5	611.5
	1.236	610.5	615.5	611
	1.237	610.5	615.5	614.5
	1.238	611.5	621.5	610.5
	1.239	612	621.5	613
	1.24	611.5	617	610
	1.241	613	619	610.5
	1.242	612.5	625.5	610.5
	1.243	610.5	626	614
	1.244	611.5	626.5	613
	1.245	615	623.5	615.5
	1.246	611	623.5	613.5
	1.247	611	626	614
	1.248	612.5	629	618
	1.249	612	630	616
	1.25	613	624.5	614.5
	1.251	612	626.5	619
	1.252	611	627.5	615.5
	1.253	609	628	617
	1.254	609	629	617.5
	1.255	611.5	627.5	615
	1.256	609	626	618
	1.257	611.5	624	615.5
	1.258	613	628.5	617
	1.259	611	627.5	617
	1.26	614	629	616.5
	1.261	611	629	617
	1.262	610	630.5	619.5
	1.263	611	622	618
	1.264	613	627.5	617.5
	1.265	612	624	617
	1.266	609.5	628	618.5
	1.267	614.5	628	615.5
	1.268	612	627.5	622
	1.269	614	625.5	618
	1.27	611.5	625	621.5
	1.271	613	624.5	618
	1.272	615	621.5	619
	1.273	616	623	618.5
	1.274	615	621.5	618
	1.275	616	623.5	617.5
	1.276	614.5	621.5	618.5
	1.277	617.5	621.5	618.5
	1.278	615.5	622	618
	1.279	613	618.5	617
	1.28	614.5	619	618
	1.281	612	615.5	616.5
	1.282	614.5	616.5	617
	1.283	615.5	616.5	618
	1.284	615.5	617	620.5
	1.285	614.5	612.5	618.5
	1.286	617	611	616
	1.287	615.5	609	615
	1.288	617	610	615.5
	1.289	616	610	618.5
	1.29	614.5	610	618.5
	1.291	616	607	617
	1.292	615	605.5	611.5
	1.293	616	606.5	617
	1.294	611	603.5	617
	1.295	615	606.5	615.5
	1.296	615.5	603.5	618
	1.297	610.5	600	619
	1.298	616	603	616
	1.299	614.5	599	618.5
	1.3	615.5	599	614.5
	1.301	618	598.5	618
	1.302	614.5	598	611
	1.303	615.5	598.5	613.5
	1.304	613.5	598.5	610.5
	1.305	612	596	615.5
	1.306	616.5	597	615.5
	1.307	615.5	598	613.5
	1.308	618.5	595	618
	1.309	615.5	595	614
	1.31	615	593.5	614.5
	1.311	617	596	614.5
	1.312	616	596.5	614.5
	1.313	615.5	597	615.5
	1.314	615.5	596.5	616
	1.315	617	595.5	616.5
	1.316	616	593	615.5
	1.317	616	598	618
	1.318	618.5	598	616.5
	1.319	612	595.5	617
	1.32	615.5	598	613
	1.321	612.5	602.5	616
	1.322	611.5	593.5	615.5
	1.323	615.5	601.5	616
	1.324	617	603	614
	1.325	615.5	605	615.5
	1.326	615.5	600.5	615.5
	1.327	613	603.5	615.5
	1.328	614.5	600.5	615.5
	1.329	617.5	604.5	617
	1.33	615.5	601.5	615.5
	1.331	615.5	605.5	619
	1.332	618.5	607.5	617.5
	1.333	618.5	606.5	618
	1.334	615.5	607.5	619
	1.335	614	608.5	618
	1.336	615.5	611	617.5
	1.337	618.5	607.5	619
	1.338	619	610	618
	1.339	615.5	615.5	617.5
	1.34	619	613.5	617
	1.341	615.5	610.5	618.5
	1.342	617.5	615.5	615.5
	1.343	618.5	613	615.5
	1.344	617	615.5	617
	1.345	616	609	619
	1.346	617.5	616	616
	1.347	618.5	613.5	616.5
	1.348	615.5	614.5	618
	1.349	615.5	615	615.5
	1.35	617.5	615.5	616.5
	1.351	618.5	617	617
	1.352	618	617	616
	1.353	621	619.5	619
	1.354	618.5	613.5	615.5
	1.355	618	615.5	615.5
	1.356	620	617	619
	1.357	619.5	615.5	617.5
	1.358	620.5	614.5	615.5
	1.359	616.5	615.5	616.5
	1.36	616	615.5	618
	1.361	621	616.5	615.5
	1.362	622	616.5	619
	1.363	618.5	618	622
	1.364	619	615	619
	1.365	619	614	616.5
	1.366	621	618	616
	1.367	618	615.5	616.5
	1.368	618.5	615.5	618
	1.369	617.5	618	613.5
	1.37	618.5	613.5	614
	1.371	616	615.5	616
	1.372	619	612.5	617.5
	1.373	620.5	611	617.5
	1.374	617	614	617
	1.375	617.5	614	614.5
	1.376	619	609.5	612.5
	1.377	616	612.5	613.5
	1.378	616.5	613	617.5
	1.379	618	607.5	615.5
	1.38	612	613.5	614.5
	1.381	615.5	610	612.5
	1.382	617	606.5	611
	1.383	617.5	609	614.5
	1.384	617	607.5	617
	1.385	616.5	607	614.5
	1.386	617.5	607.5	614
	1.387	617	601.5	610.5
	1.388	616.5	601.5	613.5
	1.389	615.5	606	612
	1.39	614.5	602.5	609.5
	1.391	616	602	609
	1.392	615.5	600.5	611.5
	1.393	613	599	608
	1.394	611	602.5	609
	1.395	612.5	601	607.5
	1.396	614	597.5	611
	1.397	614.5	596	608.5
	1.398	613	599	611
	1.399	611.5	596.5	612
	1.4	611.5	595.5	612.5
	1.401	613	601.5	609.5
	1.402	611.5	598.5	611
	1.403	612	597	608.5
	1.404	611.5	596	608.5
	1.405	612.5	597.5	615.5
	1.406	614	595.5	608.5
	1.407	611.5	599	609.5
	1.408	609	597	608.5
	1.409	610.5	595	609
	1.41	611	598	610
	1.411	611	598	609
	1.412	612.5	593.5	612.5
	1.413	607.5	594.5	611.5
	1.414	608	595	614.5
	1.415	608.5	595.5	610
	1.416	609	597.5	610.5
	1.417	605.5	597.5	610
	1.418	605.5	595.5	611.5
	1.419	604.5	595	610.5
	1.42	610	597.5	610
	1.421	607.5	592.5	615.5
	1.422	609	596.5	613
	1.423	608	595.5	613
	1.424	608.5	593	614
	1.425	603.5	595.5	613
	1.426	605.5	598	611.5
	1.427	609	596	611
	1.428	608.5	594	612
	1.429	606	595.5	613
	1.43	603.5	593.5	613.5
	1.431	603.5	598.5	615.5
	1.432	604.5	596	615.5
	1.433	608.5	595.5	612
	1.434	607	595.5	614.5
	1.435	605.5	595.5	615
	1.436	608.5	595	611.5
	1.437	609	596	614.5
	1.438	607.5	597.5	615.5
	1.439	607.5	596	616
	1.44	605.5	593.5	613.5
	1.441	606	595	611
	1.442	606.5	593	616
	1.443	607.5	597	616
	1.444	607.5	591	617.5
	1.445	606.5	594.5	617
	1.446	608	590	617
	1.447	605.5	595	616
	1.448	607.5	592.5	616.5
	1.449	606.5	589.5	613
	1.45	608.5	594.5	615.5
	1.451	605.5	586.5	617
	1.452	610	587	616
	1.453	606.5	586	615.5
	1.454	607	586	615.5
	1.455	608.5	588	616.5
	1.456	607.5	583	613
	1.457	607	585	611.5
	1.458	612.5	585	614.5
	1.459	609	579	617
	1.46	608.5	582	613.5
	1.461	609	581	613.5
	1.462	611	581	611
	1.463	608.5	579	613
	1.464	611	577.5	612.5
	1.465	611.5	576.5	611.5
	1.466	611.5	576	608.5
	1.467	609	575.5	611.5
	1.468	613	570.5	607.5
	1.469	614	574.5	606
	1.47	611.5	570.5	609
	1.471	615	568	604
	1.472	614	567.5	601
	1.473	616.5	564.5	605
	1.474	612	564.5	601.5
	1.475	615.5	563	606
	1.476	616	560.5	602.5
	1.477	617.5	557.5	601.5
	1.478	615.5	561.5	600
	1.479	617	559.5	601.5
	1.48	613	558	598.5
	1.481	615.5	554	596.5
	1.482	620.5	554	597.5
	1.483	620	551.5	593
	1.484	617	551.5	598
	1.485	621	549.5	593.5
	1.486	617	547	595
	1.487	615.5	547.5	596.5
	1.488	619.5	543.5	591
	1.489	616.5	545.5	590.5
	1.49	620	543	590.5
	1.491	618.5	539	586
	1.492	618.5	540	587.5
	1.493	619.5	538.5	588
	1.494	622.5	539.5	585.5
	1.495	620	534.5	591
	1.496	620.5	533	584.5
	1.497	619.5	536	583.5
	1.498	622	530.5	582
	1.499	619.5	533	583
	1.5	619.5	527.5	581.5
	1.501	620	526.5	580
	1.502	621.5	527.5	578
	1.503	622.5	522	581
	1.504	620	523	578
	1.505	621.5	523	572.5
	1.506	621	519	577
	1.507	623	521	574.5
	1.508	622	518	574.5
	1.509	624.5	515	574.5
	1.51	624	518.5	573.5
	1.511	623	512	570.5
	1.512	622	513	575.5
	1.513	623	510	572
	1.514	619.5	509.5	571.5
	1.515	622	508.5	571
	1.516	623.5	506	574.5
	1.517	623	505.5	567.5
	1.518	621	499	568
	1.519	621.5	499	568.5
	1.52	622.5	500	564.5
	1.521	621.5	498.5	567.5
	1.522	619.5	498	567
	1.523	623	496.5	566.5
	1.524	622	496.5	565.5
	1.525	626	494	566
	1.526	623	490	568
	1.527	620.5	485	566.5
	1.528	620.5	481.5	565.5
	1.529	621	484.5	565
	1.53	617.5	482	564.5
	1.531	616	478.5	564
	1.532	622	476.5	563
	1.533	620.5	476	559.5
	1.534	620	474	562.5
	1.535	619.5	468.5	562
	1.536	617.5	466.5	565.5
	1.537	616.5	464	561.5
	1.538	617.5	461	562
	1.539	617	459	563
	1.54	616.5	459.5	561.5
	1.541	615.5	454.5	563.5
	1.542	622	447	562
	1.543	615.5	449.5	562
	1.544	616	444.5	562
	1.545	620	444	561
	1.546	618.5	444	562
	1.547	614	438	559
	1.548	618	438	556
	1.549	614.5	434	556.5
	1.55	616	430.5	559.5
	1.551	615	426	559.5
	1.552	613	424	558
	1.553	614.5	424	555
	1.554	615.5	421.5	552
	1.555	611.5	415	555
	1.556	612.5	414	554
	1.557	615.5	410	549.5
	1.558	615	406	550
	1.559	613	405	547
	1.56	612.5	402.5	547
	1.561	615.5	399	547
	1.562	615	396	545
	1.563	611.5	390.5	547
	1.564	611	395	545
	1.565	610.5	385.5	541
	1.566	611.5	380	541
	1.567	614.5	379	539
	1.568	612.5	380	535.5
	1.569	612.5	370.5	537.5
	1.57	615.5	369	533.5
	1.571	609	364	535.5
	1.572	612.5	364	529.5
	1.573	611.5	361.5	529.5
	1.574	608.5	353.5	527
	1.575	609	351	520.5
	1.576	611	352	522.5
	1.577	609	345.5	517.5
	1.578	615.5	341.5	517.5
	1.579	613	339.5	517
	1.58	612.5	338	513.5
	1.581	611.5	331	512
	1.582	607.5	332.5	507.5
	1.583	609	324	506
	1.584	611.5	322	502
	1.585	611	315	496.5
	1.586	612.5	313.5	494
	1.587	605	308.5	492.5
	1.588	608.5	307	489.5
	1.589	609	304	482.5
	1.59	609	302.5	480.5
	1.591	608.5	298.5	473
	1.592	611	298.5	470.5
	1.593	609	290.5	466.5
	1.594	608	292.5	465
	1.595	606	284.5	457.5
	1.596	610.5	283	455.5
	1.597	610	279	451
	1.598	612	277.5	447.5
	1.599	610	273	442.5
	1.6	609	269.5	440.5
	1.601	607.5	266	434.5
	1.602	610	262	429.5
	1.603	607	260	424.5
	1.604	609	261.5	421
	1.605	608.5	251.5	419
	1.606	609	253	415.5
	1.607	608.5	253	412
	1.608	608.5	249	409.5
	1.609	608.5	244.5	409
	1.61	608.5	242	400
	1.611	607	239	403
	1.612	606.5	238.5	395.5
	1.613	610.5	231	390
	1.614	612.5	233	393.5
	1.615	609.5	232	386.5
	1.616	611	229	383.5
	1.617	610.5	226.5	380.5
	1.618	609	224.5	381
	1.619	610	222.5	375.5
	1.62	610	223	375.5
	1.621	611.5	218.5	369
	1.622	612.5	218	370.5
	1.623	608.5	216	367
	1.624	613	213	361
	1.625	615.5	211.5	360
	1.626	610.5	210.5	358
	1.627	610	206	355
	1.628	612.5	207	353
	1.629	608.5	204	352.5
	1.63	609	205	343.5
	1.631	610.5	200	343.5
	1.632	611.5	200	344.5
	1.633	610	197	342
	1.634	608.5	195.5	339.5
	1.635	609	195.5	335
	1.636	609	191.5	333
	1.637	609	192.5	335
	1.638	607.5	191	325.5
	1.639	612	189.5	324
	1.64	610.5	190	321
	1.641	609	188.5	318
	1.642	610.5	184	314.5
	1.643	611	181	316
	1.644	608.5	182	313.5
	1.645	608.5	180	308.5
	1.646	609	183	305
	1.647	605.5	178.5	301
	1.648	611.5	176	298
	1.649	610.5	178.5	295
	1.65	611	174	294.5
	1.651	608.5	172	290.5
	1.652	614	174	287
	1.653	608	173.5	281.5
	1.654	612	172	279
	1.655	611	171.5	280
	1.656	610	172	276
	1.657	608.5	171	271.5
	1.658	609	168.5	269
	1.659	614.5	174.5	265
	1.66	612	170	264.5
	1.661	615.5	169	262
	1.662	608.5	169	256.5
	1.663	610.5	172	256
	1.664	610	168	251
	1.665	614.5	171	246
	1.666	613	175.5	248.5
	1.667	615.5	174.5	245.5
	1.668	610.5	177.5	242
	1.669	614	179.5	242.5
	1.67	616	178	242.5
	1.671	616	184.5	236.5
	1.672	616	184	235.5
	1.673	618.5	186.5	229.5
	1.674	615.5	192.5	226.5
	1.675	619.5	193	225
	1.676	618.5	199.5	226
	1.677	620	207	223
	1.678	615.5	208.5	222.5
	1.679	619.5	213.5	222.5
	1.68	621.5	215	218.5
	1.681	620.5	222.5	217
	1.682	621.5	225	218.5
	1.683	624	228.5	214.5
	1.684	618.5	236.5	213.5
	1.685	622.5	242	213
	1.686	623	245	213
	1.687	621	247	209.5
	1.688	624	253.5	207.5
	1.689	621.5	255.5	208
	1.69	622	258.5	210.5
	1.691	620.5	266	206.5
	1.692	626	268.5	207
	1.693	619.5	272.5	204
	1.694	622	277.5	205
	1.695	626.5	281	205
	1.696	624	283.5	202.5
	1.697	625	287	202.5
	1.698	624	288.5	202
	1.699	622.5	296	205
	1.7	624.5	301	204.5
	1.701	625.5	299.5	203
	1.702	625.5	305.5	198.5
	1.703	624	307.5	202.5
	1.704	625	314	202.5
	1.705	627	313	203
	1.706	624.5	314	198
	1.707	624.5	318.5	199.5
	1.708	624.5	322.5	198.5
	1.709	622.5	323	202.5
	1.71	624	324	201
	1.711	628.5	326	200.5
	1.712	623.5	327	201.5
	1.713	624	326	203.5
	1.714	623	328.5	203
	1.715	622.5	324	203.5
	1.716	621.5	330.5	203.5
	1.717	621.5	329	204
	1.718	626.5	330	206.5
	1.719	620	324	205.5
	1.72	622	330	205.5
	1.721	622	328.5	207
	1.722	622.5	329.5	205.5
	1.723	621	331.5	209
	1.724	621	334	208.5
	1.725	621.5	332.5	210.5
	1.726	621.5	332.5	208.5
	1.727	621	331	211
	1.728	617.5	332	212.5
	1.729	618.5	333.5	212
	1.73	620.5	335	211.5
	1.731	618.5	333	213
	1.732	618.5	333	214
	1.733	618	337	218
	1.734	617.5	337	218.5
	1.735	618	337.5	221
	1.736	618.5	335	221.5
	1.737	620	341	221.5
	1.738	617	337.5	224
	1.739	614.5	338.5	227
	1.74	614.5	340	224.5
	1.741	615.5	340.5	226
	1.742	612	338	226
	1.743	615.5	340	229.5
	1.744	614.5	337	231.5
	1.745	612.5	341	231.5
	1.746	612	338.5	233
	1.747	611.5	341.5	232.5
	1.748	610.5	340	239
	1.749	609.5	342	235
	1.75	611.5	343.5	236.5
	1.751	610	342	237
	1.752	608.5	342	240.5
	1.753	609	343.5	241.5
	1.754	611	342	243
	1.755	611.5	343	244.5
	1.756	608.5	342.5	248.5
	1.757	605.5	348.5	250.5
	1.758	608.5	344	251
	1.759	609	348.5	253.5
	1.76	609	350.5	255
	1.761	609	349	255
	1.762	608.5	353	260.5
	1.763	611	356	260.5
	1.764	610	355.5	266
	1.765	607.5	361	266.5
	1.766	613	362	266.5
	1.767	611	364	267
	1.768	609	366	277
	1.769	613	374.5	276.5
	1.77	609.5	374	278
	1.771	608	378.5	281.5
	1.772	615.5	381.5	284
	1.773	611	386	283
	1.774	607.5	391.5	286
	1.775	608.5	400	285.5
	1.776	611	403.5	294
	1.777	613	415	290.5
	1.778	610	417	293
	1.779	611.5	423.5	292
	1.78	610	433.5	294.5
	1.781	611	444.5	294
	1.782	614.5	449.5	294.5
	1.783	612	458	301
	1.784	615.5	470	304
	1.785	615.5	477	303
	1.786	612	484	304.5
	1.787	614.5	494.5	308.5
	1.788	613	506	311
	1.789	619.5	517.5	315
	1.79	615.5	530.5	313.5
	1.791	613	534.5	321.5
	1.792	615.5	544	322
	1.793	615.5	555	326.5
	1.794	615.5	567.5	328
	1.795	615	575	330
	1.796	617	581	336.5
	1.797	616.5	591.5	342
	1.798	618.5	598.5	348
	1.799	615.5	607	345.5
	1.8	616.5	615	350.5
	1.801	619.5	624	356
	1.802	619.5	629	362.5
	1.803	619	640.5	364.5
	1.804	615.5	645.5	369
	1.805	618.5	648.5	376
	1.806	618.5	657.5	380.5
	1.807	616	665	384
	1.808	619.5	670.5	388
	1.809	615.5	677.5	391.5
	1.81	617.5	687	402.5
	1.811	618	693	402
	1.812	617	698	406.5
	1.813	617	703.5	412
	1.814	618.5	709	417
	1.815	619.5	711.5	418.5
	1.816	617	717	425.5
	1.817	614	722.5	428
	1.818	612.5	728.5	435
	1.819	613	731.5	437
	1.82	613.5	738	442
	1.821	611.5	738.5	446.5
	1.822	609	745	452
	1.823	617	750.5	454
	1.824	614	752.5	459
	1.825	613	756	465.5
	1.826	611.5	764.5	467.5
	1.827	612.5	766	469.5
	1.828	609	771	471.5
	1.829	609	775	479
	1.83	611	779.5	481
	1.831	611	783.5	484
	1.832	608	788	486.5
	1.833	607	792	490.5
	1.834	610	794.5	493.5
	1.835	609	800	497
	1.836	611	805.5	501.5
	1.837	606	811.5	504.5
	1.838	605.5	814.5	505.5
	1.839	611.5	821	506
	1.84	608	824	513
	1.841	607.5	829	516
	1.842	608	829.5	519
	1.843	607.5	838.5	522.5
	1.844	603.5	841.5	526
	1.845	602	850.5	530.5
	1.846	608.5	854	537
	1.847	602.5	861	545
	1.848	605	861	546.5
	1.849	604	871	549.5
	1.85	606.5	872	551.5
	1.851	604	877.5	554
	1.852	606.5	884	560.5
	1.853	602.5	892.5	561
	1.854	605.5	894.5	569.5
	1.855	602.5	902	572.5
	1.856	601	906.5	580
	1.857	602	911	582
	1.858	601	916.5	590
	1.859	602.5	920	591
	1.86	602	924	595.5
	1.861	603.5	933	603.5
	1.862	600.5	934.5	609.5
	1.863	600.5	941.5	614
	1.864	606.5	946	618.5
	1.865	604	949.5	624
	1.866	599.5	956.5	630
	1.867	601	958	636.5
	1.868	603.5	967.5	643
	1.869	599	972	649.5
	1.87	597	973	658
	1.871	597.5	979	662.5
	1.872	600.5	983	666.5
	1.873	597	989	677
	1.874	597.5	993.5	685
	1.875	593.5	995	688
	1.876	596.5	998.5	690
	1.877	595	1003.5	697.5
	1.878	597.5	1008	703
	1.879	593.5	1006.5	706
	1.88	597	1011	712
	1.881	595.5	1014	721
	1.882	592.5	1016	722
	1.883	591.5	1021.5	726
	1.884	591.5	1024	731.5
	1.885	589	1025	735
	1.886	590.5	1030.5	734.5
	1.887	594.5	1032.5	739.5
	1.888	590	1032.5	746
	1.889	590.5	1038	745.5
	1.89	585.5	1042.5	750
	1.891	588.5	1039	752.5
	1.892	586	1045.5	763
	1.893	583.5	1042	766
	1.894	588	1052	767.5
	1.895	588	1052.5	773.5
	1.896	581	1051.5	774
	1.897	585.5	1056.5	779.5
	1.898	584.5	1060	783
	1.899	584.5	1060	786
	1.9	585.5	1058.5	782.5
	1.901	585.5	1064	793
	1.902	584	1065	793
	1.903	587.5	1068	793
	1.904	582.5	1069	799.5
	1.905	583	1068.5	800.5
	1.906	583	1069	809.5
	1.907	585.5	1071	809
	1.908	582	1074.5	811
	1.909	588	1074.5	814.5
	1.91	584	1072	819
	1.911	585	1077.5	824
	1.912	581	1077.5	827
	1.913	580.5	1080.5	831.5
	1.914	582.5	1079	832.5
	1.915	581	1082	838
	1.916	579.5	1084.5	839
	1.917	582.5	1084	846.5
	1.918	580.5	1085.5	848.5
	1.919	578	1086	854
	1.92	581	1086.5	859.5
	1.921	577.5	1087.5	865
	1.922	578.5	1087.5	867
	1.923	577.5	1089.5	872
	1.924	571.5	1089.5	877
	1.925	574	1090	880
	1.926	574.5	1092.5	887
	1.927	577.5	1092.5	890
	1.928	574.5	1094	890
	1.929	573	1093	898
	1.93	572.5	1094.5	899.5
	1.931	571.5	1094	903.5
	1.932	570	1092.5	906
	1.933	571.5	1097.5	911.5
	1.934	567.5	1091	913.5
	1.935	564	1097.5	917
	1.936	567.5	1095.5	921
	1.937	567.5	1097.5	919
	1.938	564.5	1098.5	926.5
	1.939	563	1100.5	930.5
	1.94	563.5	1097.5	931.5
	1.941	563.5	1099.5	936
	1.942	558	1101	939.5
	1.943	559.5	1099.5	937
	1.944	559	1101.5	942.5
	1.945	552	1102.5	944
	1.946	560.5	1101	949
	1.947	559.5	1103	946.5
	1.948	559.5	1104.5	948
	1.949	556	1107	952.5
	1.95	556	1108.5	952.5
	1.951	553	1108.5	953.5
	1.952	553.5	1116	952.5
	1.953	552	1117	956
	1.954	550	1117.5	950.5
	1.955	547	1118	956.5
	1.956	548.5	1119	960
	1.957	541.5	1126	962
	1.958	543.5	1128.5	958.5
	1.959	540	1130	962
	1.96	540	1132	960.5
	1.961	531	1135.5	964
	1.962	537	1135	966.5
	1.963	532	1141	968.5
	1.964	533	1144	969.5
	1.965	532.5	1144	970
	1.966	530.5	1140.5	974.5
	1.967	528	1143.5	973.5
	1.968	528.5	1143.5	974
	1.969	523.5	1146	977
	1.97	522.5	1147.5	978.5
	1.971	520.5	1149.5	977.5
	1.972	521.5	1151	980
	1.973	520	1151	979.5
	1.974	519.5	1151.5	977
	1.975	513.5	1151.5	984
	1.976	511.5	1151.5	985
	1.977	511.5	1151.5	986.5
	1.978	511	1151.5	986
	1.979	507.5	1151.5	988.5
	1.98	509.5	1160.5	984.5
	1.981	506	1160.5	990
	1.982	505.5	1157.5	993
	1.983	501	1158.5	990.5
	1.984	502.5	1159.5	998.5
	1.985	501	1162	997
	1.986	496.5	1161	1000.5
	1.987	496.5	1158	1002
	1.988	494	1158.5	1005.5
	1.989	491.5	1157	1005.5
	1.99	491	1151.5	1012
	1.991	488.5	1151.5	1009.5
	1.992	485.5	1151.5	1013.5
	1.993	485.5	1150.5	1019
[truncated: 5,006 more rows]

## Sheet: G
DataTypeVer2.0	Time	Fz	Fz	Fz
NumberOfData		15000	15000	15000
PreTriggerData		0	0	0
SamplingTime[ms]		1	1	1
DataLabel		Y1:CMJ	Y2:CMJ	Y3:CMJ
DataUnit	sec	N	N	N
	0	676	670	669
	0.001	676	672	670
	0.002	675.5	670	668
	0.003	676	673	669
	0.004	676	670	669
	0.005	676.5	667	670
	0.006	678	669.5	663
	0.007	678	667	664.5
	0.008	679.5	670	666.5
	0.009	676.5	670.5	670
	0.01	675	666.5	669.5
	0.011	677	668.5	664.5
	0.012	675	669	669
	0.013	678	669	668.5
	0.014	679.5	668.5	668
	0.015	677.5	670	670
	0.016	677	671.5	670
	0.017	678.5	667.5	667.5
	0.018	675	666.5	672
	0.019	677.5	668	668
	0.02	681.5	669	667.5
	0.021	676.5	667.5	671
	0.022	677	670	667
	0.023	675	667.5	669.5
	0.024	674.5	668.5	670
	0.025	676	668.5	668
	0.026	678	669	675.5
	0.027	677.5	668.5	670.5
	0.028	676.5	668	670
	0.029	677	670	670.5
	0.03	678.5	670.5	669
	0.031	678	671	670.5
	0.032	679.5	671.5	670.5
	0.033	677	667.5	671
	0.034	678.5	670	673
	0.035	679.5	673	670
	0.036	675.5	670.5	670.5
	0.037	676.5	670	674
	0.038	677.5	670.5	676.5
	0.039	679.5	669.5	673
	0.04	676.5	672	674.5
	0.041	677	672	672.5
	0.042	675	670.5	674
	0.043	678.5	668.5	673.5
	0.044	677.5	673	673.5
	0.045	679.5	674	672
	0.046	676.5	671.5	673.5
	0.047	680.5	671.5	674.5
	0.048	678	669	675
	0.049	675	675.5	675
	0.05	678	670	675
	0.051	677	674	675.5
	0.052	674	674	677.5
	0.053	676.5	673	674.5
	0.054	676	672	673
	0.055	675	671	677
	0.056	676.5	670	677
	0.057	676.5	674	675.5
	0.058	674	670.5	677
	0.059	677	670	677
	0.06	677	671	676
	0.061	675	674.5	675.5
	0.062	674.5	675	676.5
	0.063	675	671	671.5
	0.064	673	672.5	673.5
	0.065	676	673	675
	0.066	676	672.5	673
	0.067	675.5	671	672.5
	0.068	675.5	670.5	676.5
	0.069	672.5	675	677
	0.07	675	672.5	674
	0.071	673.5	671.5	677.5
	0.072	672	672.5	673
	0.073	673.5	670.5	673
	0.074	674	673	676
	0.075	673.5	672.5	675.5
	0.076	672.5	673.5	675.5
	0.077	674	671.5	676.5
	0.078	673	671.5	675
	0.079	672	673.5	675
	0.08	674	670.5	670
	0.081	673.5	674	674.5
	0.082	671.5	676.5	672
	0.083	671	675.5	671.5
	0.084	673.5	671.5	673
	0.085	670	671	675
	0.086	672.5	677	676.5
	0.087	669.5	673	670
	0.088	668.5	676.5	675.5
	0.089	671	673	675.5
	0.09	668.5	674.5	673.5
	0.091	669.5	674.5	674.5
	0.092	670	675.5	676
	0.093	669.5	673.5	673.5
	0.094	669.5	673.5	672
	0.095	670	678	670.5
	0.096	668.5	672	671
	0.097	672.5	674	673.5
	0.098	669.5	673.5	673
	0.099	672	673.5	674
	0.1	668	673.5	674.5
	0.101	670.5	674	669.5
	0.102	670	674	670
	0.103	669.5	672	672
	0.104	669.5	676	670
	0.105	670	671	670
	0.106	671.5	676	673
	0.107	669.5	670	670
	0.108	668.5	674.5	675
	0.109	665.5	674	670
	0.11	670	677	670
	0.111	670	674.5	673
	0.112	667.5	675	670
	0.113	671.5	672	672.5
	0.114	669.5	674.5	670.5
	0.115	670	673	672.5
	0.116	670.5	671	672
	0.117	668.5	674.5	672
	0.118	668.5	674.5	672.5
	0.119	670.5	672	671.5
	0.12	672	673	669.5
	0.121	669.5	674	671.5
	0.122	670	671	669
	0.123	671.5	675	672.5
	0.124	671	673.5	669.5
	0.125	670	672.5	670
	0.126	671.5	671	666
	0.127	670	673.5	669.5
	0.128	670	672	664.5
	0.129	671	669.5	673.5
	0.13	674	670.5	667
	0.131	670	671.5	667
	0.132	671	667.5	670
	0.133	676	667	670
	0.134	668.5	671	664.5
	0.135	674.5	668.5	668.5
	0.136	668.5	668	664.5
	0.137	671	669.5	667.5
	0.138	670	670	669.5
	0.139	672	674	669
	0.14	669.5	672.5	666
	0.141	671	670	669
	0.142	671	670	668
	0.143	671.5	670	667
	0.144	672.5	669.5	671.5
	0.145	670	666.5	667.5
	0.146	671	668.5	666
	0.147	671.5	666.5	669
	0.148	673.5	666.5	667
	0.149	674.5	665.5	667.5
	0.15	671	665.5	667
	0.151	674	668.5	666.5
	0.152	672	666	670
	0.153	670.5	664.5	666.5
	0.154	672	667.5	666.5
	0.155	672	667.5	667.5
	0.156	670	669	664.5
	0.157	674.5	667.5	663.5
	0.158	676	666.5	666
	0.159	672.5	669.5	664.5
	0.16	672.5	668	666
	0.161	673	667.5	664
	0.162	672.5	669.5	670
	0.163	677	668.5	663.5
	0.164	673.5	664.5	667.5
	0.165	673.5	670	666.5
	0.166	674.5	669	668
	0.167	673	667.5	669
	0.168	675.5	668	664.5
	0.169	677	668.5	664
	0.17	672	669.5	664
	0.171	675	666	664.5
	0.172	676.5	670	666
	0.173	673	668.5	666.5
	0.174	672	667	666
	0.175	671.5	670	663
	0.176	671.5	671	664.5
	0.177	670	670	667.5
	0.178	673	664	666
	0.179	671	669	663.5
	0.18	672.5	666.5	663
	0.181	672	667	665.5
	0.182	672.5	667.5	666.5
	0.183	677	671	669.5
	0.184	672	668	669.5
	0.185	673	666	663
	0.186	675	668.5	667
	0.187	673	669	667
	0.188	675	666.5	667
	0.189	675	670	670
	0.19	671.5	668.5	666
	0.191	672.5	666	669.5
	0.192	674	670	668.5
	0.193	672.5	669	668.5
	0.194	674.5	668.5	667
	0.195	673	668.5	670.5
	0.196	675.5	670	672.5
	0.197	675	665.5	666.5
	0.198	674	668	670
	0.199	675	672	671
	0.2	673.5	672	670.5
	0.201	672.5	667.5	670.5
	0.202	676	668.5	670
	0.203	672	669.5	670.5
	0.204	673	669.5	668.5
	0.205	672	669.5	673
	0.206	673.5	666.5	674
	0.207	677	669.5	673.5
	0.208	672	668	670.5
	0.209	675.5	671	669
	0.21	675.5	670	674.5
	0.211	673	669	669.5
	0.212	674	671	674
	0.213	671.5	666.5	674
	0.214	674	674	671
	0.215	679.5	670.5	672.5
	0.216	673.5	670	670
	0.217	674.5	670.5	673.5
	0.218	672	669.5	673
	0.219	670.5	673.5	669.5
	0.22	674	670	669
	0.221	671.5	667.5	672.5
	0.222	670	669	670.5
	0.223	672	670.5	675.5
	0.224	673.5	669.5	673
	0.225	673	670	674
	0.226	672	669	673.5
	0.227	676	669.5	674.5
	0.228	677	671.5	675.5
	0.229	673	672.5	676.5
	0.23	673	670.5	674.5
	0.231	677.5	669.5	671.5
	0.232	672	673.5	675
	0.233	673	674.5	673.5
	0.234	674	671	677
	0.235	672	670	674.5
	0.236	674.5	671.5	675.5
	0.237	671.5	672.5	675.5
	0.238	673	671	677
	0.239	674.5	668.5	673.5
	0.24	671	667	673
	0.241	674	671.5	674
	0.242	671	671.5	671
	0.243	674	674.5	673.5
	0.244	674	674.5	672
	0.245	670.5	672	677
	0.246	671.5	672	675
	0.247	674.5	670	672
	0.248	671	671.5	675
	0.249	676.5	670.5	675.5
	0.25	672	670.5	670
	0.251	673	668.5	673.5
	0.252	675.5	667	672
	0.253	670	671	672
	0.254	672.5	666.5	672.5
	0.255	670	672	672
	0.256	676	673	672
	0.257	672	671.5	676.5
	0.258	670.5	672	676
	0.259	672	672	672.5
	0.26	671.5	669.5	677
	0.261	671	670	673
	0.262	672	670	673.5
	0.263	672	669.5	673
	0.264	672.5	671.5	671
	0.265	670	673	671.5
	0.266	671	669.5	672
	0.267	669.5	668.5	672
	0.268	670	672	674
	0.269	672	669.5	670.5
	0.27	672	674	672.5
	0.271	672	671.5	670.5
	0.272	673	672	672
	0.273	672.5	671	673.5
	0.274	673	672	670
	0.275	671	670	670
	0.276	672.5	668	674
	0.277	670	670	673
	0.278	671.5	668.5	673.5
	0.279	671.5	670	672
	0.28	673	672.5	674
	0.281	671.5	669.5	673
	0.282	673.5	670	671.5
	0.283	673	672	670
	0.284	673	668	671
	0.285	672	670.5	671.5
	0.286	672	670	673
	0.287	671.5	670	670
	0.288	672	670	670.5
	0.289	673	672	670.5
	0.29	676.5	671.5	667
	0.291	672	670.5	669.5
	0.292	672	673	669.5
	0.293	672	673.5	670
	0.294	671	669.5	669.5
	0.295	671.5	670.5	667
	0.296	670	669.5	667.5
	0.297	673	669	670.5
	0.298	669.5	670	667.5
	0.299	671.5	668.5	668
	0.3	672.5	669.5	670.5
	0.301	676	672.5	669.5
	0.302	672	670	664.5
	0.303	670	670	668.5
	0.304	670	670	670.5
	0.305	670.5	668	667.5
	0.306	669.5	672.5	669.5
	0.307	671.5	671.5	667
	0.308	671.5	674	672.5
	0.309	672.5	669.5	667.5
	0.31	668.5	670.5	667.5
	0.311	671	670.5	672
	0.312	670.5	669	670
	0.313	672	670	671
	0.314	669.5	666.5	668.5
	0.315	674	673.5	670
	0.316	670	668.5	668.5
	0.317	669.5	670.5	670
	0.318	670	670.5	668.5
	0.319	670	669	670
	0.32	669	667.5	668
	0.321	666	669.5	667.5
	0.322	669	670.5	667
	0.323	668	668	670
	0.324	671.5	669.5	669.5
	0.325	668.5	669	668.5
	0.326	669.5	670	671.5
	0.327	671	667.5	669
	0.328	671	669.5	669.5
	0.329	671	667	668.5
	0.33	667.5	668.5	669
	0.331	670	670.5	666
	0.332	672	669.5	664.5
	0.333	669	668	669.5
	0.334	668	668	668
	0.335	670.5	670	668.5
	0.336	670.5	669	669
	0.337	672	668.5	668.5
	0.338	666	665.5	666.5
	0.339	670.5	667	668.5
	0.34	669.5	670.5	668.5
	0.341	669.5	670	670
	0.342	670	670	669
	0.343	670	668.5	669
	0.344	668	668.5	669
	0.345	670	667	664.5
	0.346	670.5	668.5	671.5
	0.347	668.5	666.5	666.5
	0.348	671.5	669.5	669
	0.349	670	670	667
	0.35	666.5	666.5	667.5
	0.351	670	664.5	667.5
	0.352	672.5	666	668
	0.353	669.5	663	672.5
	0.354	671	669.5	670
	0.355	670.5	667	668.5
	0.356	669	666	668
	0.357	670	668.5	667.5
	0.358	673	668.5	669.5
	0.359	671	668.5	669.5
	0.36	670	666	666.5
	0.361	671.5	669	669.5
	0.362	675	666	664.5
	0.363	673.5	662	669
	0.364	672	666.5	670
	0.365	669.5	667.5	664.5
	0.366	670	667.5	667.5
	0.367	674	668.5	666
	0.368	674	666.5	666
	0.369	672	663.5	666.5
	0.37	673.5	669.5	667.5
	0.371	675.5	670	664.5
	0.372	673	670	668
	0.373	674	668.5	669.5
	0.374	673	664.5	669.5
	0.375	673	667.5	667
	0.376	673	669	666.5
	0.377	673	670.5	668.5
	0.378	670	669.5	668.5
	0.379	672.5	667.5	666
	0.38	673.5	669	666
	0.381	674	667	663.5
	0.382	674.5	669	667
	0.383	674	669.5	664.5
	0.384	676	668.5	664
	0.385	675	672	666
	0.386	672	669	667.5
	0.387	676.5	670	664
	0.388	675	669	663.5
	0.389	676	671.5	665.5
	0.39	671.5	669	669.5
	0.391	674.5	673	664.5
	0.392	675.5	672.5	664
	0.393	677	672	667.5
	0.394	674.5	670	664.5
	0.395	677	671.5	667.5
	0.396	673.5	672	664.5
	0.397	673.5	671.5	665.5
	0.398	670	673	664.5
	0.399	679.5	673	669.5
	0.4	670.5	670	666.5
	0.401	674	675.5	664.5
	0.402	673	671.5	667.5
	0.403	672	675	667.5
	0.404	671.5	673	668
	0.405	673.5	674	666.5
	0.406	672.5	674	666
	0.407	671	674.5	669.5
	0.408	674.5	672	664.5
	0.409	674.5	672	670
	0.41	673	676	668
	0.411	673.5	673.5	671.5
	0.412	670	675.5	664.5
	0.413	673	675.5	667.5
	0.414	672	674	670
	0.415	670.5	677.5	670
	0.416	674	673.5	668.5
	0.417	672	672	668.5
	0.418	670	671	667.5
	0.419	671.5	674	668
	0.42	673.5	675	664.5
	0.421	671	672	671.5
	0.422	668	677.5	669.5
	0.423	669	674	670.5
	0.424	670	672.5	670
	0.425	670	674.5	670
	0.426	668	675	670.5
	0.427	670	675.5	673.5
	0.428	668	676.5	670
	0.429	670	675.5	667.5
	0.43	667.5	674	671
	0.431	671	676	670
	0.432	666.5	676	670.5
	0.433	669	676.5	670.5
	0.434	663.5	673	674
	0.435	666.5	673	672
	0.436	667	675	674
	0.437	665.5	677	674.5
	0.438	664.5	673	673.5
	0.439	664.5	673.5	672.5
	0.44	664.5	674	672.5
	0.441	666	674	673
	0.442	659.5	674.5	673.5
	0.443	666	677.5	672.5
	0.444	664.5	675	673.5
	0.445	663.5	674	675
	0.446	664.5	674.5	671
	0.447	663.5	676.5	673
	0.448	662.5	676.5	673.5
	0.449	664.5	675.5	673.5
	0.45	666.5	676.5	671
	0.451	660	675	674
	0.452	662	674	675.5
	0.453	666	673.5	671.5
	0.454	663	677	677.5
	0.455	661	675	672
	0.456	663	672.5	672.5
	0.457	660.5	675.5	671.5
	0.458	662.5	678	674
	0.459	663	676	673.5
	0.46	663	678.5	676
	0.461	662	673.5	674.5
	0.462	661.5	670.5	677
	0.463	659.5	672	671.5
	0.464	664.5	677	677
	0.465	663	677	676
	0.466	661	677	672.5
	0.467	664.5	677	675.5
	0.468	663	677.5	676
	0.469	663	676.5	673.5
	0.47	660	674	676.5
	0.471	663.5	679	670.5
	0.472	663.5	677.5	677.5
	0.473	663	674	675.5
	0.474	667	676.5	673
	0.475	662.5	674	675.5
	0.476	661.5	674.5	675
	0.477	663.5	677	677.5
	0.478	665.5	676	675.5
	0.479	660.5	674	674
	0.48	666	675.5	672.5
	0.481	663	674	675.5
	0.482	666.5	676	676
	0.483	664.5	673.5	674
	0.484	664.5	672.5	672.5
	0.485	662.5	677	672.5
	0.486	664.5	677	674
	0.487	661	675.5	676
	0.488	666	672.5	675
	0.489	663.5	674.5	677.5
	0.49	664.5	677	673
	0.491	663.5	679.5	677
	0.492	664	677	673.5
	0.493	664.5	673	670.5
	0.494	666	677	673.5
	0.495	666.5	675.5	673.5
	0.496	665.5	676.5	674
	0.497	670	674.5	672.5
	0.498	666.5	675.5	675.5
	0.499	665.5	677	671
	0.5	669	671.5	675
	0.501	663	671	669.5
	0.502	664	675	673
	0.503	664.5	672	671
	0.504	664.5	675	674.5
	0.505	669	676	671.5
	0.506	666.5	670.5	671
	0.507	670.5	670	670.5
	0.508	668.5	672	671
	0.509	669.5	672.5	670
	0.51	669	672	672
	0.511	667	671.5	670
	0.512	664.5	672	669
	0.513	671	672.5	671
	0.514	669.5	674	669
	0.515	668.5	674.5	668.5
	0.516	671	673	669.5
	0.517	670.5	670	669
	0.518	669.5	670.5	667
	0.519	667.5	675.5	672
	0.52	670.5	670.5	668.5
	0.521	670	671	668
	0.522	671	670	668
	0.523	670	668.5	664
	0.524	671.5	670	665.5
	0.525	672	673	667.5
	0.526	670	669.5	669
	0.527	673.5	668	664
	0.528	669	671	664
	0.529	671	669.5	667
	0.53	670	667	666.5
	0.531	667.5	668.5	663.5
	0.532	670	667	668.5
	0.533	673.5	666	667.5
	0.534	671.5	664.5	664.5
	0.535	671	667.5	667
	0.536	674	670.5	664.5
	0.537	671.5	664.5	668.5
	0.538	670	663.5	664.5
	0.539	669.5	666.5	667
	0.54	671.5	667.5	665.5
	0.541	671.5	666.5	666.5
	0.542	671.5	666	670
	0.543	675.5	664.5	664.5
	0.544	674.5	663	665.5
	0.545	672	667	663.5
	0.546	673.5	667	664
	0.547	675.5	664.5	666.5
	0.548	672	669.5	668
	0.549	670.5	664	664.5
	0.55	677	663.5	667
	0.551	676	663	666.5
	0.552	675	661	662
	0.553	677	663	666.5
	0.554	676.5	662.5	667
	0.555	673.5	663.5	664.5
	0.556	674.5	662	666.5
	0.557	675	664.5	668.5
	0.558	676.5	664	663
	0.559	676.5	662.5	668.5
	0.56	672.5	662	664.5
	0.561	673	664	662.5
	0.562	676	663.5	664
	0.563	678.5	663	664
	0.564	677	665.5	667
	0.565	678.5	665.5	666.5
	0.566	677	661	666
	0.567	674.5	663	664.5
	0.568	677	662	669.5
	0.569	678	662.5	666
	0.57	675.5	661	667
	0.571	673	661.5	666
	0.572	678.5	663	670
	0.573	675.5	661.5	664.5
	0.574	674.5	663	669.5
	0.575	679.5	663	672.5
	0.576	676.5	663	669.5
	0.577	677	664.5	669.5
	0.578	676	662	664.5
	0.579	677	666.5	667.5
	0.58	678.5	662	666.5
	0.581	677.5	664.5	670
	0.582	677	662.5	671
	0.583	679	666	668.5
	0.584	678.5	664.5	669
	0.585	678	667	675
	0.586	677	667.5	671
	0.587	675	662	669.5
	0.588	678.5	664.5	674
	0.589	678	667	673
	0.59	676.5	664.5	671.5
	0.591	673	666	670
	0.592	677	664.5	671
	0.593	678	663.5	670
	0.594	677	669	674
	0.595	675.5	664.5	672.5
	0.596	678	664.5	671
	0.597	679.5	667	673
	0.598	677.5	664.5	672
	0.599	679.5	667.5	676
	0.6	679.5	669.5	673.5
	0.601	678.5	669	670
	0.602	679.5	667.5	673
	0.603	674.5	670	671
	0.604	677.5	669.5	671.5
	0.605	678.5	668.5	674.5
	0.606	678.5	669	673.5
	0.607	679	666	671
	0.608	676.5	670.5	675.5
	0.609	678	667	676.5
	0.61	674.5	668.5	674
	0.611	677	671	675
	0.612	675.5	670	673.5
	0.613	675.5	674	674
	0.614	677	672	670.5
	0.615	677.5	671	674
	0.616	677.5	673	675
	0.617	675.5	670.5	672
	0.618	676	670	672
	0.619	675	671.5	675.5
	0.62	675	670	675
	0.621	674	672.5	674.5
	0.622	674	670.5	673
	0.623	675	673	676
	0.624	673	672	677
	0.625	674.5	675	672.5
	0.626	678.5	674	674
	0.627	672	669.5	674
	0.628	675	672	676
	0.629	671	669.5	671.5
	0.63	675.5	670	670
	0.631	674.5	670	673.5
	0.632	677	671	672
	0.633	677	673.5	672
	0.634	673	675	670
	0.635	674.5	671	672
	0.636	675	671.5	674
	0.637	672.5	672	673.5
	0.638	671.5	674	672
	0.639	670	675	673
	0.64	672	674.5	672
	0.641	672.5	671.5	671
	0.642	668.5	673.5	674
	0.643	672.5	675.5	671.5
	0.644	670.5	673	676
	0.645	670	673	671
	0.646	673.5	674.5	674.5
	0.647	671.5	675	670
	0.648	667.5	674	674.5
	0.649	672	673	669.5
	0.65	674	674.5	671.5
	0.651	668.5	675	673.5
	0.652	670	672.5	673.5
	0.653	671	677	675.5
	0.654	668.5	672	673.5
	0.655	670	672.5	673.5
	0.656	668.5	673.5	674
	0.657	673.5	674.5	671
	0.658	670	670.5	671
	0.659	672.5	675	672.5
	0.66	673	673	673
	0.661	670	674.5	670
	0.662	666.5	674	670.5
	0.663	670	677	673.5
	0.664	667.5	674.5	672
	0.665	670	675.5	672
	0.666	668	671	676
	0.667	670	672	669.5
	0.668	667.5	676.5	673
	0.669	667.5	674	673
	0.67	664.5	670	671.5
	0.671	667	673.5	672
	0.672	668.5	672.5	672
	0.673	669	678.5	673.5
	0.674	668	676.5	668
	0.675	670	674.5	674.5
	0.676	667	672.5	673
	0.677	664.5	677.5	672
	0.678	670	675	669.5
	0.679	670	677	676.5
	0.68	666	674	670
	0.681	664	673	670
	0.682	664.5	676	672.5
	0.683	664.5	673	674
	0.684	664.5	671.5	673.5
	0.685	666	677	670
	0.686	666.5	676	675.5
	0.687	668	674	672
	0.688	668	674	672
	0.689	668	673.5	669.5
	0.69	668.5	674	673.5
	0.691	666.5	672.5	672.5
	0.692	667.5	675	671.5
	0.693	668	672	670.5
	0.694	669	673	670
	0.695	670.5	674.5	675
	0.696	666	674	672
	0.697	669	673.5	672.5
	0.698	664.5	672	675.5
	0.699	668	669.5	672
	0.7	670	677	670
	0.701	673.5	672	672
	0.702	670.5	674	669.5
	0.703	666.5	673	671
	0.704	669.5	673	675
	0.705	669.5	675	672
	0.706	669	673	674
	0.707	669	672	673
	0.708	672	672	674
	0.709	670.5	676	671.5
	0.71	673	671	672
	0.711	670.5	669.5	671
	0.712	670.5	674.5	673
	0.713	670.5	676	674.5
	0.714	674	674	674
	0.715	671	670.5	671.5
	0.716	670.5	672	672
	0.717	670	671.5	673.5
	0.718	670	672	671.5
	0.719	670	671	673.5
	0.72	671.5	671.5	672
	0.721	674	676	671
	0.722	672	670	670
	0.723	672	673	671
	0.724	670	675	672
	0.725	670.5	667.5	673.5
	0.726	672.5	672.5	669.5
	0.727	672.5	672	673
	0.728	675.5	670	669.5
	0.729	673	670	674.5
	0.73	673.5	668.5	673.5
	0.731	669.5	667.5	671.5
	0.732	673	670	670
	0.733	670	671	670.5
	0.734	670.5	673.5	671.5
	0.735	670	669	670
	0.736	671.5	671.5	672
	0.737	672.5	670	672
	0.738	671.5	670	672
	0.739	671	667.5	669
	0.74	674	672	670.5
	0.741	673.5	668.5	670
	0.742	671	669.5	668
	0.743	671	668.5	670
	0.744	674.5	670	669.5
	0.745	670	670	671
	0.746	672	669.5	670
	0.747	671	670.5	670
	0.748	671.5	670	670
	0.749	671.5	667.5	670
	0.75	671	668	670.5
	0.751	674	670	670
	0.752	674	670	672
	0.753	671.5	668.5	670
	0.754	674.5	670	671
	0.755	671	670	672
	0.756	667.5	669.5	670
	0.757	671	669.5	669
	0.758	670	668.5	671
	0.759	674.5	668.5	670
	0.76	674	668.5	669.5
	0.761	672.5	666	669
	0.762	673.5	668.5	669.5
	0.763	673.5	670.5	668
	0.764	671	664.5	670
	0.765	673	671	671.5
	0.766	674.5	669.5	670
	0.767	674	669	670
	0.768	673.5	670.5	670
	0.769	675	669.5	669.5
	0.77	672	666.5	664.5
	0.771	674	669.5	670
	0.772	672	668.5	670
	0.773	673	667.5	670
	0.774	672	670	671
	0.775	673.5	669.5	669.5
	0.776	674.5	669	671
	0.777	673	671.5	668.5
	0.778	673	664	670.5
	0.779	670	668.5	670.5
	0.78	672.5	667.5	667.5
	0.781	674	669	670
	0.782	672.5	670	669.5
	0.783	675	672	671
	0.784	671.5	666	670.5
	0.785	671	670.5	666.5
	0.786	674.5	669.5	667.5
	0.787	670.5	668	669
	0.788	670.5	667	671
	0.789	675.5	666.5	670
	0.79	673.5	669.5	666.5
	0.791	670.5	670	669.5
	0.792	670	668.5	672
	0.793	671.5	671.5	671.5
	0.794	670	667.5	671.5
	0.795	674	664.5	671
	0.796	673	666	669.5
	0.797	672	669.5	667.5
	0.798	672	667.5	668.5
	0.799	671.5	669	670.5
	0.8	674	667	670
	0.801	675	667.5	669
	0.802	670.5	668.5	673.5
	0.803	667.5	664.5	673.5
	0.804	670.5	668.5	671
	0.805	669	666.5	672
	0.806	671	667	672
	0.807	668	666.5	670
	0.808	669.5	664.5	674
	0.809	670.5	668	674
	0.81	671.5	664	666.5
	0.811	671	669	674
	0.812	672	667	670
	0.813	671	669.5	671
	0.814	671.5	670	673
	0.815	668.5	668.5	670.5
	0.816	669.5	668.5	673
	0.817	668.5	666	674
	0.818	668	669.5	673.5
	0.819	670	664.5	672.5
	0.82	670	669.5	672.5
	0.821	669	668	673
	0.822	669	668.5	672.5
	0.823	670.5	668	672.5
	0.824	672	667	672.5
	0.825	668	669	675
	0.826	673.5	669.5	673
	0.827	671	668	669.5
	0.828	672	668.5	673
	0.829	672	668.5	673
	0.83	669	668	672.5
	0.831	670.5	666	676
	0.832	667.5	667	673.5
	0.833	671	670	671.5
	0.834	670	668	671.5
	0.835	668.5	671.5	670.5
	0.836	671.5	671.5	674
	0.837	670	669.5	673.5
	0.838	670	672	671
	0.839	670	670	671
	0.84	673	670	674
	0.841	670	668.5	671.5
	0.842	671	668.5	672
	0.843	670	669	673
	0.844	672	669.5	670.5
	0.845	671.5	672.5	673.5
	0.846	670	670	669
	0.847	673	669	673.5
	0.848	670.5	668.5	673.5
	0.849	668.5	668	667.5
	0.85	672	673	670
	0.851	668	668.5	670
	0.852	670	668.5	669.5
	0.853	670	670	670.5
	0.854	670	670	670.5
	0.855	672.5	671.5	670.5
	0.856	669	666	671.5
	0.857	670	670	672
	0.858	668.5	672.5	672
	0.859	667.5	672	670.5
	0.86	668.5	668	669
	0.861	669	668.5	670
	0.862	668	671	674
	0.863	670	670	673.5
	0.864	669	667.5	675
	0.865	673	669.5	668.5
	0.866	669	670	673.5
	0.867	670	674.5	673
	0.868	671.5	675	669.5
	0.869	671	671.5	670.5
	0.87	672	670.5	674.5
	0.871	669.5	673	670
	0.872	672.5	668.5	670
	0.873	667.5	667	670.5
	0.874	667.5	671	671
	0.875	671.5	673.5	673
	0.876	670	672	671.5
	0.877	668	669.5	670
	0.878	670	671.5	671
	0.879	672	668.5	670.5
	0.88	668	672	673
	0.881	669	672	671
	0.882	671	671	672
	0.883	669	674.5	671
	0.884	672.5	670	671
	0.885	671	672.5	674
	0.886	670	670.5	672
	0.887	672	670	672
	0.888	669.5	673	671
	0.889	670.5	671.5	673
	0.89	673.5	675	672
	0.891	673	676	673
	0.892	674	671	672
	0.893	674.5	672.5	672
	0.894	671	674.5	674.5
	0.895	671.5	676	671.5
	0.896	671.5	671.5	670
	0.897	673.5	674	671
	0.898	671	671.5	671
	0.899	672	671.5	669.5
	0.9	675	673.5	670.5
	0.901	672.5	673.5	673
	0.902	670	676	671
	0.903	672	671.5	673
	0.904	673	674	671.5
	0.905	671	671.5	673
	0.906	672	671	669.5
	0.907	674	675.5	671.5
	0.908	670	670.5	671
	0.909	671.5	674.5	674.5
	0.91	670.5	675.5	671.5
	0.911	677	672	670
	0.912	670.5	673	673
	0.913	675.5	672	676
	0.914	674	674.5	669.5
	0.915	675	674.5	672
	0.916	673	674	672.5
	0.917	676	672	668
	0.918	674	673.5	671.5
	0.919	672	673.5	669.5
	0.92	675.5	670	673.5
	0.921	674	673	671.5
	0.922	674	673	670
	0.923	673	672.5	670
	0.924	673.5	671	669.5
	0.925	674.5	672	670
	0.926	673.5	670.5	669.5
	0.927	674	670.5	669.5
	0.928	675.5	670.5	675
	0.929	675.5	669	673.5
	0.93	674	670	674
	0.931	677	672.5	669.5
	0.932	673	669.5	671
	0.933	674.5	669.5	668.5
	0.934	671.5	669.5	670
	0.935	670	672	672
	0.936	675.5	670	671
	0.937	674	669.5	672
	0.938	675	673	668.5
	0.939	676	672	670
	0.94	674.5	673	668.5
	0.941	670.5	668.5	670
	0.942	671.5	671	672.5
	0.943	674	668	672
	0.944	675.5	671	669.5
	0.945	674.5	669	670
	0.946	670.5	670.5	670
	0.947	672	670	672
	0.948	673.5	667.5	669
	0.949	675.5	670	671.5
	0.95	672	672	671.5
	0.951	673	669	671
	0.952	672	669.5	670.5
	0.953	672	669	670.5
	0.954	670.5	672	671.5
	0.955	671	669.5	671
	0.956	670	670	666.5
	0.957	670	673.5	671
	0.958	671	667.5	669
	0.959	672.5	671.5	670
	0.96	671.5	667.5	671
	0.961	672.5	670	668
	0.962	672	671	670.5
	0.963	672	673	667.5
	0.964	673	674	667.5
	0.965	670.5	672	670
	0.966	670	671	669.5
	0.967	669	671.5	669.5
	0.968	670	674.5	670
	0.969	672	673	670
	0.97	670	676	664.5
	0.971	669	672	668.5
	0.972	670	678	669
	0.973	670	676.5	668.5
	0.974	667.5	675	664.5
	0.975	670.5	669	668.5
	0.976	666	675	666.5
	0.977	670	677	668
	0.978	671	674.5	666.5
	0.979	668	676	671.5
	0.98	669.5	674.5	666
	0.981	668	675.5	669
	0.982	667	677.5	671
	0.983	670	672.5	670.5
	0.984	667	675.5	669.5
	0.985	668.5	675.5	669.5
	0.986	669.5	674	667
	0.987	670	675	670.5
	0.988	670	673	668.5
	0.989	667	673.5	670
	0.99	669.5	672	672.5
	0.991	672	677	664.5
	0.992	668.5	673.5	670
	0.993	668.5	675.5	669
	0.994	670.5	675.5	672
	0.995	667.5	674.5	669.5
	0.996	666.5	673.5	670.5
	0.997	669	677	666
	0.998	668.5	673	667.5
	0.999	671	677.5	671
	1	666.5	674.5	670
	1.001	668.5	676	669
	1.002	665.5	676	669.5
	1.003	669.5	676	670
	1.004	669	677	669.5
	1.005	668.5	675.5	669.5
	1.006	669.5	679.5	668.5
	1.007	671	674.5	669.5
	1.008	669.5	677	671.5
	1.009	668.5	678	670
	1.01	667.5	676.5	667.5
	1.011	668.5	673.5	671
	1.012	671.5	674.5	669.5
	1.013	669.5	673.5	667.5
	1.014	667.5	676	664.5
	1.015	671	673	670
	1.016	667.5	676	670
	1.017	670	676.5	666.5
	1.018	670.5	674	667.5
	1.019	667	673	668
	1.02	672	679	667.5
	1.021	670	675.5	670.5
	1.022	669.5	675.5	668
	1.023	669	676	667
	1.024	669.5	678.5	669
	1.025	669	677	671.5
	1.026	671.5	675	668.5
	1.027	667.5	676	668.5
	1.028	673.5	675.5	669.5
	1.029	670.5	675.5	667
	1.03	670	674.5	664.5
	1.031	670.5	675.5	666.5
	1.032	671	674	668
	1.033	668.5	677	670
	1.034	670.5	674.5	670.5
	1.035	671.5	677	667.5
	1.036	670	673	668.5
	1.037	670	675	663.5
	1.038	669.5	673.5	669
	1.039	673.5	674	669.5
	1.04	675	674.5	667.5
	1.041	671.5	673	668
	1.042	675.5	677	665.5
	1.043	671.5	672	669
	1.044	673	675.5	665.5
	1.045	673.5	674	667
	1.046	672.5	672.5	666.5
	1.047	671	678.5	666.5
	1.048	671	676.5	667.5
	1.049	669	672	669.5
	1.05	671.5	674	669
	1.051	669	676.5	670
	1.052	670.5	673.5	669.5
	1.053	671	676.5	666.5
	1.054	672.5	674.5	668.5
	1.055	669.5	672	669.5
	1.056	674.5	673.5	667
	1.057	669.5	673	668.5
	1.058	671	673.5	663.5
	1.059	674	673.5	671
	1.06	670.5	672	668.5
	1.061	674	674.5	670
	1.062	674	674.5	670
	1.063	673.5	676.5	670
	1.064	676.5	671	669.5
	1.065	672.5	674	670
	1.066	672.5	676.5	669
	1.067	671	672	667
	1.068	673.5	674	668.5
	1.069	673.5	673	666.5
	1.07	674	676	669
	1.071	673	676	669
	1.072	673	676	670
	1.073	671.5	671	670
	1.074	674	675	668
	1.075	676	675	671.5
	1.076	673	673	670
	1.077	675	674	668.5
	1.078	674.5	677	668
	1.079	674.5	672	670
	1.08	670.5	673.5	672
	1.081	675.5	675.5	669
	1.082	673	675.5	670
	1.083	672	675.5	669
	1.084	674	673	670.5
	1.085	674.5	677	674
	1.086	675.5	672.5	667
	1.087	675.5	674	670
	1.088	675.5	675	670.5
	1.089	674	674.5	668.5
	1.09	675	674.5	674.5
	1.091	675	673	669
	1.092	671.5	675.5	671.5
	1.093	677.5	672.5	669
	1.094	676	672.5	669.5
	1.095	674	676	669
	1.096	676.5	674	669
	1.097	672	671.5	669
	1.098	677.5	669	668
	1.099	672.5	669.5	666.5
	1.1	676	672.5	672.5
	1.101	679.5	671	667.5
	1.102	674.5	675.5	669
	1.103	677	675.5	672
	1.104	674.5	673.5	667.5
	1.105	673	672	670.5
	1.106	675.5	672.5	670
	1.107	677	672	671
	1.108	676	671	669.5
	1.109	679.5	671	670
	1.11	675.5	675.5	670.5
	1.111	675.5	674	667.5
	1.112	674.5	670	669.5
	1.113	676.5	671.5	669.5
	1.114	677	671	670.5
	1.115	676.5	675	668.5
	1.116	675.5	672.5	668.5
	1.117	677	673.5	670
	1.118	676	676.5	672
	1.119	675.5	673	669
	1.12	675	673.5	672
	1.121	674.5	672	669
	1.122	676	673.5	670.5
	1.123	675.5	673	671.5
	1.124	673.5	670	670
	1.125	677	672.5	669
	1.126	678.5	670.5	673.5
	1.127	673.5	673	671.5
	1.128	674	673.5	672.5
	1.129	675.5	670	675
	1.13	675	675	670.5
	1.131	670	673	670.5
	1.132	676.5	675	670.5
	1.133	674	671.5	672
	1.134	676.5	671	674
	1.135	671.5	674	673
	1.136	675	669.5	671
	1.137	675.5	669.5	673.5
	1.138	672.5	672	670
	1.139	674	672.5	670.5
	1.14	676	671	672.5
	1.141	673	671	673.5
	1.142	675.5	670.5	676
	1.143	671	671	673.5
	1.144	671	672.5	670.5
	1.145	676.5	672.5	675
	1.146	666	672	672
	1.147	670	672	671.5
	1.148	670	668.5	673
	1.149	671.5	671	673
	1.15	670	671.5	670
	1.151	670.5	671.5	670
	1.152	673.5	668	670
	1.153	669.5	669	673
	1.154	666	666.5	670
	1.155	668	669	673
	1.156	671	670	669.5
	1.157	672	669.5	668.5
	1.158	669.5	671	669.5
	1.159	670	670	672
	1.16	670	671.5	674
	1.161	667	669.5	673
	1.162	669.5	668	672
	1.163	670	669	671
	1.164	670	669	673
	1.165	667.5	670.5	671.5
	1.166	666	672	672
	1.167	669.5	669	675.5
	1.168	668	674	674.5
	1.169	668.5	671.5	675
	1.17	669	668.5	673.5
	1.171	669	664.5	671
	1.172	667.5	670	669.5
	1.173	672	670	670
	1.174	670	670	671
	1.175	670	666.5	671.5
	1.176	667.5	668	672
	1.177	670	669	674.5
	1.178	667	668	670.5
	1.179	667.5	670	670.5
	1.18	664.5	671	673.5
	1.181	670	670.5	671.5
	1.182	668.5	671	673.5
	1.183	669	674	675.5
	1.184	667	669	671.5
	1.185	670	671.5	670
	1.186	668.5	670	670.5
	1.187	670	673	673
	1.188	667.5	673	674.5
	1.189	668.5	674	671
	1.19	670	670	671
	1.191	670.5	671	670
	1.192	669	669.5	672
	1.193	670	675	673.5
	1.194	672	672	672.5
	1.195	669.5	671	670.5
	1.196	667	670.5	671
	1.197	670.5	676	671
	1.198	669.5	671.5	673
	1.199	670.5	672	674.5
	1.2	672.5	675	670.5
	1.201	666.5	670.5	673.5
	1.202	669.5	674.5	672
	1.203	673	672	669.5
	1.204	668.5	676	671
	1.205	670	670.5	671
	1.206	669.5	671.5	674
	1.207	670	674	672.5
	1.208	669	671.5	673.5
	1.209	673.5	674	670.5
	1.21	670	673	673.5
	1.211	670	670.5	669
	1.212	670.5	675	670
	1.213	669.5	674	671.5
	1.214	671.5	672.5	670
	1.215	672.5	672	670
	1.216	671	674.5	672
	1.217	672.5	674.5	671
	1.218	668.5	670	671
	1.219	670.5	672	670
	1.22	670.5	674.5	675
	1.221	670.5	677.5	672
	1.222	671	673.5	672
	1.223	670	675.5	672.5
	1.224	671.5	673	673
	1.225	670	672	672
	1.226	668.5	668.5	676
	1.227	670	669.5	670
	1.228	672	675	671
	1.229	670.5	678	674
	1.23	673	674.5	676
	1.231	670.5	674.5	673.5
	1.232	671.5	672	672.5
	1.233	673	674	674.5
	1.234	671.5	674	673.5
	1.235	672.5	674.5	676.5
	1.236	670.5	674.5	672
	1.237	672.5	675	672
	1.238	673.5	677	674.5
	1.239	673	670	673
	1.24	671.5	674	674
	1.241	675	676	675
	1.242	672.5	673	673.5
	1.243	669.5	674	674.5
	1.244	670	674	673.5
	1.245	672	671	677
	1.246	671.5	670	675
	1.247	672	672.5	675
	1.248	671.5	674.5	674.5
	1.249	672	672.5	674
	1.25	674.5	673.5	675
	1.251	666	674	675
	1.252	673	674	676.5
	1.253	668	671.5	674.5
	1.254	670	673	674
	1.255	670.5	675	676
	1.256	671	672.5	676.5
	1.257	674	675	674
	1.258	670	676.5	674.5
	1.259	672	677	676.5
	1.26	666	674	676.5
	1.261	670	671.5	675
	1.262	673.5	676	674
	1.263	671.5	673.5	673
	1.264	671.5	677	676
	1.265	674	673	674.5
	1.266	673	673	677
	1.267	670	676	676.5
	1.268	672.5	673.5	677
	1.269	670	677	670.5
	1.27	668.5	673.5	677
	1.271	670.5	673.5	676
	1.272	671	675	677
	1.273	670	671	678
	1.274	669.5	672.5	676.5
	1.275	671.5	671	674
	1.276	670	673.5	671.5
	1.277	671	676	677.5
	1.278	670	673	675.5
	1.279	674.5	674	677
	1.28	671	676	676.5
	1.281	671.5	673.5	677
	1.282	672.5	673.5	672.5
	1.283	670.5	670	676.5
	1.284	670	674.5	673.5
	1.285	670.5	671.5	675.5
	1.286	671	670.5	673
	1.287	674	670	672.5
	1.288	674	666.5	672
	1.289	670	673	673.5
	1.29	671	670	677.5
	1.291	671.5	671	672
	1.292	671	671	676
	1.293	673.5	670	671
	1.294	674	669	677
	1.295	671.5	669	671
	1.296	673	672	671.5
	1.297	670.5	669	672
	1.298	669	669.5	671.5
	1.299	673.5	669.5	672
	1.3	672	669.5	671.5
	1.301	673	669.5	674.5
	1.302	670	670	672
	1.303	672	668.5	670
	1.304	670	670	670
	1.305	670.5	671	671
	1.306	672	670	670.5
	1.307	674	669	670.5
	1.308	672.5	668.5	672
	1.309	671.5	666.5	668.5
	1.31	672	670	668.5
	1.311	671	667	669.5
	1.312	671.5	666	671
	1.313	671.5	663.5	670
	1.314	673	669	672
	1.315	672.5	665.5	670
	1.316	673	667	669
	1.317	676	667.5	669.5
	1.318	676	669.5	668
	1.319	676.5	664.5	668.5
	1.32	678.5	664.5	667
	1.321	673.5	664.5	668
	1.322	675	666	668.5
	1.323	676.5	664.5	666
	1.324	677	668.5	664
	1.325	675	664.5	666
	1.326	674.5	664.5	669
	1.327	678.5	670	664
	1.328	674	667	666
	1.329	675.5	664.5	664.5
	1.33	675	666.5	667
	1.331	677	667	664.5
	1.332	677.5	665.5	664.5
	1.333	677	667.5	666.5
	1.334	675	667	666.5
	1.335	676	665.5	661
	1.336	675	668.5	666.5
	1.337	674	670	668
	1.338	675	667.5	664.5
	1.339	674	667	666.5
	1.34	676	667	664.5
	1.341	674.5	670	663.5
	1.342	677.5	667	664.5
	1.343	676	671.5	664.5
	1.344	672	666.5	664.5
	1.345	674.5	670.5	664.5
	1.346	674.5	668	667.5
	1.347	672	670.5	664
	1.348	672	670	666.5
	1.349	670.5	671.5	666
	1.35	670.5	670	663.5
	1.351	673	667.5	668
	1.352	674.5	669.5	667
	1.353	669.5	670	664.5
	1.354	675.5	670	665.5
	1.355	674.5	668.5	665.5
	1.356	670	669.5	668.5
	1.357	671.5	668	670
	1.358	675.5	671	666.5
	1.359	674.5	667	669.5
	1.36	670	671	668
	1.361	676	670	664.5
	1.362	671.5	666	667
	1.363	674	669.5	668.5
	1.364	669	668.5	666.5
	1.365	674	668.5	666.5
	1.366	671	677.5	664.5
	1.367	674	668.5	667.5
	1.368	670	669	668
	1.369	670.5	671.5	670
	1.37	671	672.5	666.5
	1.371	673	674.5	669
	1.372	671.5	670.5	668
	1.373	671	669.5	664.5
	1.374	672	671.5	666
	1.375	670.5	669	670.5
	1.376	672	671.5	669
	1.377	670.5	670	666.5
	1.378	672	668	670
	1.379	669.5	671	669.5
	1.38	672	673.5	668.5
	1.381	670.5	669	670
	1.382	672.5	672	668
	1.383	667	676	665.5
	1.384	671	672	669.5
	1.385	670	673.5	670
	1.386	671	670	669
	1.387	670.5	673.5	670
	1.388	669.5	674.5	667.5
	1.389	670	671	667.5
	1.39	672.5	675.5	669.5
	1.391	666	671	670
	1.392	672	672	668
	1.393	668	675	669
	1.394	671	672	668
	1.395	670.5	671.5	670
	1.396	672	673	671
	1.397	672	672.5	670
	1.398	670	674	670.5
	1.399	671	674	667
	1.4	670	675	669
	1.401	673	673.5	673
	1.402	673	672.5	670
	1.403	671.5	675	669.5
	1.404	670	671	670
	1.405	668.5	670.5	668.5
	1.406	674	675	666
	1.407	672	673	667
	1.408	672.5	674	669.5
	1.409	671	674.5	669
	1.41	673.5	676	667.5
	1.411	674.5	676	668
	1.412	675	674	667.5
	1.413	676	676.5	668
	1.414	676.5	679	667.5
	1.415	674.5	674.5	666.5
	1.416	678	674.5	671.5
	1.417	674.5	673	670.5
	1.418	677	675	667.5
	1.419	679	675	666.5
	1.42	676	677.5	669.5
	1.421	676.5	674.5	669.5
	1.422	678	674	667.5
	1.423	682.5	678	673
	1.424	679.5	676.5	672
	1.425	676	676	669.5
	1.426	677	670	670.5
	1.427	678	675.5	668
	1.428	676.5	674	669.5
	1.429	678	674.5	672
	1.43	677	676	672
	1.431	680.5	677	672.5
	1.432	677.5	677	671
	1.433	679.5	673.5	672
	1.434	677	676	671.5
	1.435	679.5	676.5	669.5
	1.436	677	677.5	672
	1.437	679.5	676	672
	1.438	679.5	676	672
	1.439	681	676	673
	1.44	679	675	672
	1.441	679.5	673	670.5
	1.442	684	674	672.5
	1.443	679.5	677	670.5
	1.444	679.5	675.5	674
	1.445	683.5	674	670
	1.446	679	677	676
	1.447	683.5	677	672
	1.448	687	674	673.5
	1.449	683	674.5	676
	1.45	679.5	674.5	673
	1.451	683.5	677.5	675.5
	1.452	679.5	675.5	677.5
	1.453	684	674	673
	1.454	679.5	675.5	673.5
	1.455	679.5	674.5	675.5
	1.456	679	678.5	673.5
	1.457	683.5	676	677
	1.458	679.5	676.5	679
	1.459	682.5	674.5	677
	1.46	683.5	679	676.5
	1.461	683.5	677.5	677
	1.462	681.5	678.5	679
	1.463	679.5	677	677
	1.464	678.5	675	677
	1.465	681.5	676	676.5
	1.466	679	678.5	676.5
	1.467	679.5	677	679
	1.468	679.5	677	677
	1.469	682	679.5	677
	1.47	679.5	679.5	675.5
	1.471	679.5	681.5	678
	1.472	676.5	678	677.5
	1.473	676	678.5	679.5
	1.474	679	680.5	677.5
	1.475	677.5	679.5	677
	1.476	679.5	677.5	675
	1.477	678.5	677.5	676.5
	1.478	678.5	679	676.5
	1.479	675	679.5	676
	1.48	679.5	679.5	677
	1.481	675	677.5	677.5
	1.482	676	677	677
	1.483	677	679.5	676
	1.484	675.5	679	676.5
	1.485	674	679.5	678
	1.486	676	681.5	674
	1.487	672.5	678.5	676
	1.488	677	678.5	672
	1.489	674.5	679.5	675
	1.49	675	682.5	678
	1.491	672.5	676.5	676
	1.492	672.5	680.5	674
	1.493	673	679	676
	1.494	674.5	679.5	674
	1.495	675	682	676.5
	1.496	672.5	679.5	674.5
	1.497	674.5	679.5	674
	1.498	672.5	678.5	671
	1.499	673	679.5	670
	1.5	672	682.5	677
	1.501	672.5	682	673.5
	1.502	673.5	679.5	676
	1.503	671.5	682	675
	1.504	672	679.5	670
	1.505	671.5	679.5	673
	1.506	672.5	682	675
	1.507	673	683	673.5
	1.508	672	679	674
	1.509	671.5	684	673
	1.51	673	681.5	674.5
	1.511	672	686	671.5
	1.512	674	684	672.5
	1.513	676	683	671.5
	1.514	672	679.5	670
	1.515	670.5	683	670.5
	1.516	674.5	683.5	673
	1.517	669.5	679.5	670
	1.518	673.5	683.5	672
	1.519	672.5	685.5	671.5
	1.52	670	678	673.5
	1.521	675	683	672.5
	1.522	671.5	685.5	672
	1.523	671	684.5	670
	1.524	671.5	682.5	673.5
	1.525	670	682	669.5
	1.526	672.5	684	672
	1.527	671	682.5	669.5
	1.528	673	683.5	672
	1.529	673.5	679.5	671.5
	1.53	672	684	670
	1.531	673.5	685.5	671
	1.532	675.5	682.5	669
	1.533	671	684	670.5
	1.534	671	679.5	672.5
	1.535	674	681.5	670.5
	1.536	674	681.5	671.5
	1.537	673.5	682.5	668.5
	1.538	670	681.5	670
	1.539	672.5	678.5	670.5
	1.54	673.5	679.5	672
	1.541	676.5	679.5	671
	1.542	677	679	670.5
	1.543	675.5	679	674
	1.544	671	683	670.5
	1.545	673	679.5	670.5
	1.546	670	678.5	671
	1.547	671.5	681.5	669
	1.548	674	682	675.5
	1.549	671.5	677	670
	1.55	674	679	671
	1.551	674.5	677.5	670
	1.552	675	678.5	673
	1.553	673	678.5	675
	1.554	673.5	678	673
	1.555	673	677.5	671
	1.556	671.5	678	673
	1.557	671	676.5	677
	1.558	673.5	678.5	671
	1.559	672	673.5	673.5
	1.56	673	674	673.5
	1.561	674.5	677	676
	1.562	675	674	674
	1.563	671	673.5	669.5
	1.564	673	674	674
	1.565	676.5	674	674
	1.566	672.5	676.5	675
	1.567	670.5	670.5	675.5
	1.568	672.5	670	675.5
	1.569	672	672.5	677
	1.57	676	673.5	677
	1.571	674	671	672.5
	1.572	671.5	670	674.5
	1.573	672	668.5	674
	1.574	677	673	673
	1.575	676	664.5	671
	1.576	673	669	674.5
	1.577	671.5	670	673.5
	1.578	672	672	675.5
	1.579	674	666	674.5
	1.58	673	667.5	677
	1.581	674.5	670	673
	1.582	670	667.5	673
	1.583	672	663.5	674
	1.584	673	667.5	673
	1.585	673.5	666	677
	1.586	671	668.5	673.5
	1.587	677	664	673.5
	1.588	674.5	663.5	676
	1.589	673	662.5	676.5
	1.59	670	664.5	673.5
	1.591	673.5	669.5	676.5
	1.592	675	663.5	672.5
	1.593	673	663	672
	1.594	672	664.5	671.5
	1.595	673.5	661	677.5
	1.596	672	662	675.5
	1.597	672.5	664.5	675
	1.598	674.5	662.5	674
	1.599	673	658.5	672
	1.6	676	660	674
	1.601	673.5	658.5	675
	1.602	673.5	659.5	674
	1.603	674.5	659.5	674
	1.604	677.5	662	673
	1.605	673.5	658.5	674.5
	1.606	670.5	659	673
	1.607	670	659	675
	1.608	676	655	672.5
	1.609	675	659.5	676
	1.61	675.5	657	675
	1.611	673.5	657	673.5
	1.612	669	659	674
	1.613	675.5	657	672.5
	1.614	677.5	658.5	669
	1.615	678	656.5	676.5
	1.616	677	657	675
	1.617	677	658	673
	1.618	674.5	658	675
	1.619	678	659	674
	1.62	678	657	676
	1.621	679.5	659.5	674
	1.622	677	658	678.5
	1.623	679.5	656	678.5
	1.624	677.5	656	677
	1.625	678	658	677.5
	1.626	677.5	659	678.5
	1.627	679	660	679.5
	1.628	678.5	659.5	679.5
	1.629	679.5	662	679.5
	1.63	681.5	660	677
	1.631	678.5	657.5	679.5
	1.632	678	659	678.5
	1.633	679	663	679.5
	1.634	679.5	658	682
	1.635	683.5	664	679.5
	1.636	679.5	663	677
	1.637	679.5	664.5	682
	1.638	679.5	663	679.5
	1.639	679.5	661	679.5
	1.64	679.5	663.5	683.5
	1.641	679.5	666.5	679.5
	1.642	681.5	662	681.5
	1.643	679.5	661.5	679.5
	1.644	681	664.5	679.5
	1.645	682.5	663	679.5
	1.646	678.5	669	683.5
	1.647	679.5	669	682.5
	1.648	683	667	679.5
	1.649	681	668	682.5
	1.65	681	668.5	682.5
	1.651	679.5	668	683
	1.652	682	671.5	683
	1.653	678	670.5	682
	1.654	683	670	679.5
	1.655	682	671.5	682.5
	1.656	683	672.5	684
	1.657	681	671.5	684
	1.658	683.5	671.5	681.5
	1.659	682.5	672.5	679.5
	1.66	684	673.5	678.5
	1.661	682.5	672	682
	1.662	685.5	674.5	683
	1.663	684	670.5	679.5
	1.664	683.5	675.5	681.5
	1.665	683.5	673.5	679.5
	1.666	683.5	675	679.5
	1.667	684.5	672	684
	1.668	684	677	682.5
	1.669	683.5	672.5	683
	1.67	682	675.5	683.5
	1.671	677.5	673	679
	1.672	683	671	679.5
	1.673	679.5	675	683.5
	1.674	683	677	683
	1.675	682	675	679.5
	1.676	679.5	671.5	681
	1.677	678	669.5	681.5
	1.678	679	674	683.5
	1.679	676	672	679.5
	1.68	678	674.5	683.5
	1.681	679.5	673	681.5
	1.682	678.5	675.5	686.5
	1.683	679.5	676.5	684.5
	1.684	679.5	672.5	682
	1.685	676.5	676.5	683.5
	1.686	673	673.5	687.5
	1.687	677.5	675	683.5
	1.688	677	672.5	682.5
	1.689	676	670.5	684
	1.69	675.5	674.5	684
	1.691	674	676	686
	1.692	674	674.5	686
	1.693	675	676	686
	1.694	673.5	676	682
	1.695	673.5	672	683
	1.696	670	671.5	686.5
	1.697	671	671.5	684
	1.698	670.5	674.5	687
	1.699	669.5	670	682
	1.7	669	676.5	683
	1.701	671	670	687
	1.702	667.5	671	684.5
	1.703	672	672	686.5
	1.704	670.5	670	684
	1.705	667.5	672.5	683
	1.706	668.5	672	683
	1.707	664	672.5	679.5
	1.708	666	672.5	686.5
	1.709	665.5	669.5	685
	1.71	664.5	670	685.5
	1.711	663.5	672	686.5
	1.712	661	669.5	684.5
	1.713	663.5	667	681.5
	1.714	662.5	667.5	682.5
	1.715	664	668	679.5
	1.716	663.5	668	684
	1.717	664.5	667	679.5
	1.718	663	664.5	681
	1.719	661.5	667	685.5
	1.72	663.5	664.5	682.5
	1.721	660.5	666	683
	1.722	660.5	664.5	684
	1.723	658.5	664.5	684.5
	1.724	656.5	669	681
	1.725	661.5	662	683.5
	1.726	655.5	661	683.5
	1.727	655	666	684.5
	1.728	658.5	664.5	684
	1.729	656.5	666	681.5
	1.73	656.5	663.5	683
	1.731	656	664.5	684
	1.732	653	664.5	683
	1.733	656.5	660.5	684
	1.734	652.5	661	683.5
	1.735	648.5	663	688.5
	1.736	653	662	681.5
	1.737	651.5	663.5	685
	1.738	652.5	661.5	683.5
	1.739	651.5	662	686.5
	1.74	649.5	662.5	684
	1.741	645.5	661.5	689.5
	1.742	649	664.5	684.5
	1.743	649.5	662.5	683.5
	1.744	649.5	660.5	685.5
	1.745	649.5	657.5	683
	1.746	647	658.5	685.5
	1.747	649.5	661	685
	1.748	646	657	688.5
	1.749	645	656.5	684
	1.75	646	658.5	684
	1.751	649.5	659	687
	1.752	645	658	687
	1.753	644	658	685
	1.754	642	656	685
	1.755	646.5	658.5	688.5
	1.756	644.5	656.5	686
	1.757	641.5	656.5	688
	1.758	644	655.5	686
	1.759	643	654	688.5
	1.76	641	653.5	687
	1.761	638	653.5	684.5
	1.762	641.5	655.5	685.5
	1.763	643	649.5	689
	1.764	637.5	653	684
	1.765	635	649.5	687
	1.766	637	649.5	688
	1.767	638	653	687
	1.768	637	649.5	689
	1.769	636.5	643.5	687
	1.77	635	649	690.5
	1.771	635	645	684.5
	1.772	634	649.5	686
	1.773	633.5	649	688.5
	1.774	633	646	684
	1.775	632	642.5	690.5
	1.776	627.5	642	684
	1.777	629.5	644.5	685.5
	1.778	630	642.5	686.5
	1.779	629	645.5	686
	1.78	629	638.5	686
	1.781	627.5	641	686.5
	1.782	627	640.5	688.5
	1.783	624.5	639.5	686
	1.784	622	633	689
	1.785	623.5	634	687.5
	1.786	621	631	687.5
	1.787	620	636.5	687.5
	1.788	618	635	687
	1.789	615	633.5	690
	1.79	616	634	690
	1.791	614	631.5	684.5
	1.792	614.5	629	688.5
	1.793	614.5	626.5	689
	1.794	610.5	623.5	687.5
	1.795	609.5	627	687.5
	1.796	610	624.5	684
	1.797	608.5	621.5	687
	1.798	601.5	622.5	689
	1.799	601.5	618	685
	1.8	601	619.5	685
	1.801	601	619.5	684.5
	1.802	601	616.5	682.5
	1.803	598	615.5	684.5
	1.804	600.5	612	685
	1.805	590	609.5	687.5
	1.806	595	608.5	681
	1.807	590	610.5	685.5
	1.808	588.5	604	684
	1.809	588	608	682
	1.81	587	603.5	683
	1.811	582.5	605	684
	1.812	584	600	684
	1.813	577	598.5	682.5
	1.814	574.5	602.5	679.5
	1.815	577.5	597.5	684.5
	1.816	577	597.5	685.5
	1.817	573.5	596	681.5
	1.818	570.5	597.5	684
	1.819	570	593	684
	1.82	566	590	682.5
	1.821	565	588.5	682.5
	1.822	564	588.5	679.5
	1.823	562.5	588	684
	1.824	561.5	581.5	677.5
	1.825	558	586.5	681
	1.826	555	587	679.5
	1.827	552.5	582.5	682.5
	1.828	554	581	684.5
	1.829	548.5	578.5	681.5
	1.83	547	578	685
	1.831	546.5	575	679.5
	1.832	544	576	681
	1.833	540	573	678
	1.834	538.5	574	677.5
	1.835	536	574	679.5
	1.836	530.5	572.5	685
	1.837	529.5	570	678.5
	1.838	525.5	569	678
	1.839	519.5	564.5	684
	1.84	521	564.5	679.5
	1.841	515.5	564	676.5
	1.842	513	562.5	678.5
	1.843	508.5	560.5	677.5
	1.844	507	563	677.5
	1.845	502.5	558	678
	1.846	504.5	555	679.5
	1.847	497.5	555.5	677
	1.848	497.5	554	676
	1.849	490.5	553	672.5
	1.85	487.5	553	671.5
	1.851	485.5	551.5	672
	1.852	483.5	549	672.5
	1.853	480	544.5	675
	1.854	478.5	546.5	673
	1.855	474.5	545	674
	1.856	470.5	541.5	670
	1.857	463.5	543	671.5
	1.858	461.5	537.5	670
	1.859	461	536.5	670
	1.86	459.5	532.5	669.5
	1.861	453.5	533.5	664.5
	1.862	451	533	669.5
	1.863	449	535	664.5
	1.864	446	532	667.5
	1.865	443	529	663.5
	1.866	439.5	527.5	662.5
	1.867	438.5	523.5	660
	1.868	437.5	521	662
	1.869	435	521	663
	1.87	426	521	661
	1.871	428.5	516	658.5
	1.872	426	515.5	660
	1.873	420	515.5	661.5
	1.874	421	515	659
	1.875	412.5	508.5	654.5
	1.876	410	509.5	655
	1.877	407.5	506	656.5
	1.878	407.5	506.5	654.5
	1.879	404.5	503.5	653
	1.88	400	500	657
	1.881	395.5	502.5	653.5
	1.882	394.5	499.5	652.5
	1.883	392.5	497.5	649.5
	1.884	390.5	496	649.5
	1.885	388	496.5	651.5
	1.886	385.5	493	654
	1.887	383.5	492.5	652
	1.888	381	492.5	649.5
	1.889	378.5	490.5	649
	1.89	376	490	647
	1.891	374	487	649.5
	1.892	366.5	488	645.5
	1.893	368	488.5	649.5
	1.894	367	484.5	647.5
	1.895	363	483.5	649
	1.896	358.5	484.5	648
	1.897	358	481	646
	1.898	357.5	478.5	646.5
	1.899	354	476.5	644.5
	1.9	352.5	479	646
	1.901	349	479	645.5
	1.902	343.5	476	646.5
	1.903	342	475.5	643.5
	1.904	343.5	473	646.5
	1.905	337.5	474	643.5
	1.906	337.5	471	642.5
	1.907	336	472.5	643
	1.908	329.5	471.5	644
	1.909	334	471	643
	1.91	329	472.5	643.5
	1.911	327.5	471	641
	1.912	328	471	642
	1.913	328	472.5	641.5
	1.914	325	468.5	637
	1.915	325.5	467.5	638.5
	1.916	325.5	471	636.5
	1.917	322.5	469.5	638
	1.918	325.5	466	638.5
	1.919	324	469.5	633.5
	1.92	321.5	465.5	635
	1.921	325.5	469	635
	1.922	327.5	471	632
	1.923	328	467	630.5
	1.924	336.5	468	629
	1.925	332.5	469.5	629
	1.926	336.5	467	628.5
	1.927	340.5	469	627.5
	1.928	339.5	468.5	627
	1.929	348	467.5	626
	1.93	349.5	468	622
	1.931	357	462	621.5
	1.932	360.5	467	627
	1.933	361	466.5	625
	1.934	364	467.5	619
	1.935	373	470	622
	1.936	378.5	469.5	624.5
	1.937	380	471	621
	1.938	385.5	470	618
	1.939	389	470	617.5
	1.94	388.5	470.5	618.5
	1.941	393.5	474	619.5
	1.942	399	468.5	618
	1.943	403	470	621.5
	1.944	408.5	471	615.5
	1.945	409	469	620
	1.946	411	474	620
	1.947	416	472.5	617.5
	1.948	420	470	617.5
	1.949	417	476.5	620
	1.95	420	475	616.5
	1.951	422.5	476.5	617
	1.952	423	474.5	618
	1.953	430	474.5	616
	1.954	426.5	478.5	614
	1.955	426.5	478	614
	1.956	429.5	478.5	614.5
	1.957	428	480	612
	1.958	431.5	483	613
	1.959	430	484	611
	1.96	428	483	611
	1.961	429	485.5	608.5
	1.962	425.5	486.5	610
	1.963	428	487.5	605
	1.964	424	490	608.5
	1.965	424	490	604.5
	1.966	423.5	494	605
	1.967	423	491.5	604.5
	1.968	422	494.5	599
	1.969	424.5	495	600
	1.97	423.5	498	597.5
	1.971	424	500.5	595
	1.972	423	497.5	597
	1.973	423.5	499	590
	1.974	421	503	588
	1.975	425.5	499	588.5
	1.976	421	500.5	584
	1.977	421.5	504	584.5
	1.978	421	500.5	578.5
	1.979	422	506	578.5
	1.98	424	506	571.5
	1.981	424	504	569
	1.982	424.5	503	568
	1.983	422	504.5	566.5
	1.984	424	503.5	562
	1.985	427	504.5	560.5
	1.986	422	505	551
	1.987	427	504	551
	1.988	424.5	503	548
	1.989	425	506	540.5
	1.99	430.5	501.5	540
	1.991	430	504	536
	1.992	427.5	503.5	532.5
	1.993	429	501.5	529
[truncated: 13,006 more rows]

## Sheet: H
DataTypeVer2.0	Time	Fz	Fz	Fz
NumberOfData		8000	8000	8000
PreTriggerData		0	0	0
SamplingTime[ms]		1	1	1
DataLabel		U1:CMJ	U2:CMJ	U3:CMJ
DataUnit	sec	N	N	N
	0	620	616.5	610.5
	0.001	619	620	614
	0.002	619.5	621	615.5
	0.003	619	618.5	614
	0.004	620	618	614
	0.005	622.5	622	614
	0.006	623	618.5	612
	0.007	621	623	615.5
	0.008	621	620	612.5
	0.009	617	618.5	615
	0.01	618.5	621	615.5
	0.011	621	624	617
	0.012	621	622.5	612.5
	0.013	616	621.5	616
	0.014	617	625	611.5
	0.015	619	620.5	613
	0.016	618	620	614.5
	0.017	617	621	615.5
	0.018	621	622	618.5
	0.019	618.5	622.5	617
	0.02	619	624.5	619
	0.021	617	622.5	620
	0.022	612.5	622	613.5
	0.023	616.5	620	617
	0.024	616.5	620	614
	0.025	615	622.5	619
	0.026	615.5	622.5	617
	0.027	615.5	621	621.5
	0.028	614.5	621	619.5
	0.029	619	619	618
	0.03	619	622	617
	0.031	616	620.5	622
	0.032	618	619.5	619
	0.033	612	619	620
	0.034	615.5	617.5	616.5
	0.035	616.5	620.5	617.5
	0.036	615.5	619.5	620
	0.037	616.5	617	619.5
	0.038	613.5	617	615.5
	0.039	615.5	619.5	618.5
	0.04	614.5	615.5	620
	0.041	617.5	621	616.5
	0.042	615.5	618	618.5
	0.043	616.5	618.5	616.5
	0.044	618.5	615	619
	0.045	617	614	617
	0.046	616	616	620
	0.047	615.5	612.5	617
	0.048	613.5	617.5	617
	0.049	615.5	619	616
	0.05	616	615.5	619
	0.051	616	619	620.5
	0.052	616.5	614	617
	0.053	615	616	620.5
	0.054	615	614.5	615.5
	0.055	615.5	615	616.5
	0.056	618.5	615.5	620
	0.057	617	613.5	616
	0.058	615	611.5	617
	0.059	613.5	612	619.5
	0.06	615.5	612	617.5
	0.061	616.5	612	617.5
	0.062	617	615.5	617.5
	0.063	619	609.5	617
	0.064	619	612	617
	0.065	617	610	617
	0.066	613	613.5	619
	0.067	620	610.5	616
	0.068	616	608.5	621
	0.069	618	614.5	615.5
	0.07	617	612.5	616
	0.071	618.5	608	613.5
	0.072	616	611	614.5
	0.073	615.5	612.5	614.5
	0.074	617	610	617
	0.075	617	612	615.5
	0.076	617	608.5	619
	0.077	617	608.5	617
	0.078	617.5	611	616
	0.079	615.5	609	615
	0.08	618.5	609	615.5
	0.081	617	608	616
	0.082	618.5	610.5	615.5
	0.083	618	608.5	616
	0.084	621	610.5	615.5
	0.085	616.5	609.5	616.5
	0.086	620.5	609.5	615.5
	0.087	620	611.5	617
	0.088	619	608	616
	0.089	615.5	609.5	614
	0.09	617	608.5	616
	0.091	615.5	609	617
	0.092	615	611	613.5
	0.093	616	611.5	615.5
	0.094	617	609.5	616
	0.095	615.5	611.5	615.5
	0.096	612.5	608.5	611.5
	0.097	616.5	608.5	616.5
	0.098	615.5	610.5	613
	0.099	616.5	609.5	617.5
	0.1	617	609.5	615.5
	0.101	614.5	610	617
	0.102	609	607	614
	0.103	616	613	615.5
	0.104	614.5	611.5	619.5
	0.105	617.5	611	614.5
	0.106	616	610	618.5
	0.107	614	614.5	617
	0.108	614.5	612	617
	0.109	613	608	615.5
	0.11	615	613.5	618
	0.111	614	611	618
	0.112	611.5	609.5	618.5
	0.113	615.5	609.5	617
	0.114	614.5	610.5	615
	0.115	615	611.5	615.5
	0.116	612	614.5	619
	0.117	610	613	617.5
	0.118	608.5	612.5	617.5
	0.119	613	614	617
	0.12	611	615.5	620.5
	0.121	612.5	615	614.5
	0.122	609.5	613	617
	0.123	614.5	614.5	616.5
	0.124	610.5	616	616.5
	0.125	612	615	617
	0.126	610.5	612.5	619.5
	0.127	613	617	619
	0.128	611	616.5	617
	0.129	612	614	620
	0.13	611.5	617	617
	0.131	610.5	615	617
	0.132	610.5	616.5	618
	0.133	607.5	616	619.5
	0.134	613.5	613.5	620
	0.135	613.5	613	620.5
	0.136	609.5	617	618.5
	0.137	611.5	614.5	620
	0.138	614	614	620
	0.139	609.5	615.5	618.5
	0.14	609	615.5	617
	0.141	611	613	620
	0.142	611.5	615.5	618
	0.143	611.5	617	619
	0.144	611	616.5	617
	0.145	612	616	620.5
	0.146	609.5	616.5	621
	0.147	613	615.5	619
	0.148	612	614.5	621
	0.149	608.5	614.5	626
	0.15	615	618	619
	0.151	615.5	618	620
	0.152	614.5	617	620
	0.153	613	615.5	620.5
	0.154	613.5	619	619
	0.155	615	616.5	620
	0.156	612.5	616.5	618.5
	0.157	613.5	619	620.5
	0.158	614.5	617	624.5
	0.159	614.5	618	619.5
	0.16	616.5	614.5	618.5
	0.161	612	619	621.5
	0.162	613	620	622
	0.163	612.5	620	620.5
	0.164	612	617	621.5
	0.165	614.5	620	618.5
	0.166	616	619.5	619
	0.167	615.5	618.5	618.5
	0.168	616	618.5	622
	0.169	615.5	618	622
	0.17	613	619.5	622.5
	0.171	618	622	621.5
	0.172	616	615.5	622
	0.173	615.5	619	620
	0.174	617	617	624.5
	0.175	618.5	616.5	621
	0.176	618	616	621.5
	0.177	615.5	620	622.5
	0.178	619.5	617	622.5
	0.179	616.5	618.5	618
	0.18	617	618.5	621
	0.181	618	619.5	619
	0.182	614.5	619.5	620
	0.183	617	618	619
	0.184	619	615.5	619.5
	0.185	622	616	620.5
	0.186	620	617	618.5
	0.187	619.5	619.5	617
	0.188	619	617	620.5
	0.189	615.5	619	622
	0.19	618	618.5	620
	0.191	620.5	616.5	619
	0.192	618.5	617.5	618
	0.193	616.5	618	621.5
	0.194	619	619.5	615.5
	0.195	616.5	620	616.5
	0.196	620	618	616.5
	0.197	618.5	619	617
	0.198	618	617	618
	0.199	615	620	620
	0.2	617	621	618.5
	0.201	621	620.5	619
	0.202	618.5	616.5	615.5
	0.203	619	617	620
	0.204	618.5	620	618
	0.205	618	620.5	619
	0.206	619	618.5	619.5
	0.207	617	616	618.5
	0.208	619	617	615.5
	0.209	616	616	619.5
	0.21	623	619.5	617
	0.211	622.5	618	615.5
	0.212	620	617	619
	0.213	620.5	619	618.5
	0.214	619.5	616	618.5
	0.215	619.5	617	619.5
	0.216	620	620	617
	0.217	619	619.5	616
	0.218	618.5	621	617
	0.219	619.5	618.5	615.5
	0.22	620	622.5	617
	0.221	620.5	617	617
	0.222	619	616	617
	0.223	619.5	616	616
	0.224	617	620	616.5
	0.225	618.5	618.5	619.5
	0.226	619	623	619
	0.227	617	622	618
	0.228	619	619	614
	0.229	621	619.5	617
	0.23	619	621.5	621
	0.231	618.5	622	616.5
	0.232	620	622.5	621
	0.233	620	622	616.5
	0.234	621	622	616
	0.235	621	618	615.5
	0.236	617	619.5	616.5
	0.237	618	617	612.5
	0.238	621	624	616.5
	0.239	618	618.5	617
	0.24	619.5	622	617
	0.241	620	617	616.5
	0.242	616	621	620
	0.243	619	622	617
	0.244	620	616	616.5
	0.245	617	621	618
	0.246	619.5	618	615.5
	0.247	619.5	617	615.5
	0.248	616	620	615.5
	0.249	619	617	618
	0.25	620	616.5	619
	0.251	619	618	618
	0.252	617	620	617.5
	0.253	619	619.5	613
	0.254	621	617	615
	0.255	619	621.5	617
	0.256	622	619	616
	0.257	621	617.5	618.5
	0.258	618	620	620.5
	0.259	619	618.5	618
	0.26	620	619	609.5
	0.261	617	617	613.5
	0.262	620.5	621	617.5
	0.263	617	618.5	614.5
	0.264	617	619.5	615.5
	0.265	616	622	613.5
	0.266	618	621	614
	0.267	616.5	620.5	615.5
	0.268	617	618	612.5
	0.269	618	621.5	615.5
	0.27	615.5	619	614.5
	0.271	616.5	617	612
	0.272	618	620.5	614.5
	0.273	622	619	614.5
	0.274	621	620.5	612.5
	0.275	619	621	613
	0.276	620	621.5	611.5
	0.277	621	622.5	610.5
	0.278	621	622	608.5
	0.279	620	620.5	611
	0.28	615.5	618	609
	0.281	619.5	620.5	609
	0.282	615.5	621	608
	0.283	617	619.5	612
	0.284	619	616	609
	0.285	622	617	611.5
	0.286	620.5	618.5	608
	0.287	624	620.5	607
	0.288	622	617	608
	0.289	622	616.5	609.5
	0.29	618	615.5	608.5
	0.291	618.5	620	607.5
	0.292	619.5	619	603.5
	0.293	622	616.5	605
	0.294	622.5	616.5	603
	0.295	618	616.5	605.5
	0.296	620.5	617	606.5
	0.297	621.5	618.5	604
	0.298	622	614.5	605.5
	0.299	621	615.5	604.5
	0.3	619	618	603.5
	0.301	623	614.5	599
	0.302	619.5	614.5	603
	0.303	622	615.5	605.5
	0.304	621.5	616.5	597
	0.305	620	619.5	602
	0.306	620	619.5	601.5
	0.307	616	617	598.5
	0.308	623.5	615.5	598.5
	0.309	618	616	598.5
	0.31	622	615.5	601.5
	0.311	619.5	617	600
	0.312	618.5	615	601.5
	0.313	617	615.5	596
	0.314	619	615.5	598
	0.315	619	614.5	599
	0.316	620	614	597
	0.317	620.5	615.5	596
	0.318	618.5	614	597
	0.319	619	615	596.5
	0.32	618	617	598.5
	0.321	620	613.5	596.5
	0.322	620.5	615.5	599
	0.323	616	614	598
	0.324	617	616	596.5
	0.325	614.5	615.5	596.5
	0.326	614.5	615	596
	0.327	618	615.5	600
	0.328	617	611.5	594
	0.329	617	615.5	596.5
	0.33	615.5	616.5	597
	0.331	616.5	613	599
	0.332	616	614	598
	0.333	617	613	593
	0.334	619.5	615.5	596
	0.335	614	610	598.5
	0.336	614	612	596.5
	0.337	618	611.5	598
	0.338	616	610.5	597.5
	0.339	616	609.5	600.5
	0.34	619	612	599
	0.341	615.5	609	595
	0.342	614	613.5	597
	0.343	618	610	596
	0.344	615	611	598
	0.345	618	613	599.5
	0.346	616	611.5	598.5
	0.347	612	610	599
	0.348	615	611	601.5
	0.349	613.5	611	601.5
	0.35	614.5	608	602
	0.351	613.5	612	604
	0.352	613.5	612	600.5
	0.353	615.5	614	601.5
	0.354	614.5	609	602.5
	0.355	617.5	608.5	601.5
	0.356	613.5	611.5	603
	0.357	614	609	602
	0.358	614	611	602
	0.359	613.5	607.5	606.5
	0.36	614.5	611.5	604
	0.361	613.5	612.5	604.5
	0.362	613.5	607	604.5
	0.363	610.5	609	607.5
	0.364	615	612.5	607
	0.365	613.5	607.5	602
	0.366	615.5	612.5	609.5
	0.367	612.5	608.5	606
	0.368	615	609	607.5
	0.369	616	610.5	609.5
	0.37	612.5	610.5	611
	0.371	616.5	612	607
	0.372	615.5	614	608.5
	0.373	611	612.5	607
	0.374	614.5	612.5	609.5
	0.375	614	612.5	610
	0.376	611	610	613
	0.377	616	610	609
	0.378	614.5	609.5	608.5
	0.379	618	611	608.5
	0.38	615	608.5	609.5
	0.381	615	609.5	609
	0.382	616	609.5	611
	0.383	614	611	613
	0.384	616	612	610
	0.385	615.5	611	608
	0.386	616.5	611	609.5
	0.387	615.5	609	611.5
	0.388	621	608.5	610.5
	0.389	616.5	613	608
	0.39	620.5	610.5	613
	0.391	618	610.5	608.5
	0.392	620	609.5	606.5
	0.393	618.5	606.5	609.5
	0.394	619	610.5	611.5
	0.395	618	610	607.5
	0.396	620	611	611
	0.397	617	613	610.5
	0.398	618.5	612.5	608.5
	0.399	618.5	610.5	607.5
	0.4	618.5	612.5	608
	0.401	618.5	611.5	607
	0.402	620	610.5	606.5
	0.403	621	613	604.5
	0.404	616.5	612.5	608.5
	0.405	619	612.5	608.5
	0.406	619	612	605.5
	0.407	622	612	606
	0.408	621	608.5	607.5
	0.409	619.5	611	606
	0.41	619	609.5	605
	0.411	620.5	611.5	604
	0.412	619	611	604.5
	0.413	620.5	608.5	607
	0.414	618	612	604.5
	0.415	618	610	601.5
	0.416	622.5	614	603.5
	0.417	620.5	611	603.5
	0.418	619	609	603
	0.419	621	612.5	605.5
	0.42	620.5	611.5	603.5
	0.421	619	608.5	608
	0.422	617	611	602
	0.423	621	610	603.5
	0.424	617	610	604
	0.425	617.5	613	605.5
	0.426	617	612	604
	0.427	617	610.5	605
	0.428	614.5	611	601.5
	0.429	615.5	610.5	604.5
	0.43	617	615	600.5
	0.431	615.5	614.5	602
	0.432	616	610	603
	0.433	612.5	612	601.5
	0.434	616	612.5	602
	0.435	615	611	600.5
	0.436	612.5	609	601.5
	0.437	611.5	613.5	604
	0.438	613	609	605
	0.439	614.5	615	606.5
	0.44	614.5	612	601.5
	0.441	615.5	613.5	603
	0.442	613	614.5	602
	0.443	610	614.5	604
	0.444	610	611	608
	0.445	609.5	613	605
	0.446	613	612.5	604.5
	0.447	614.5	617	605
	0.448	607.5	609	607.5
	0.449	610	612.5	605.5
	0.45	609	612	604
	0.451	609.5	612.5	606.5
	0.452	609	613	606
	0.453	608.5	615.5	606
	0.454	606	612.5	607.5
	0.455	611	615.5	607.5
	0.456	608.5	609	609.5
	0.457	608	611.5	612
	0.458	609	612.5	608.5
	0.459	608.5	612	608
	0.46	608.5	611	609
	0.461	606.5	614.5	612
	0.462	608.5	619.5	608
	0.463	605	609.5	613.5
	0.464	607	614	609
	0.465	608.5	616	612.5
	0.466	606.5	614.5	611
	0.467	608	614	612.5
	0.468	609	616	611
	0.469	608	612	611.5
	0.47	609.5	617	616.5
	0.471	605	616.5	615.5
	0.472	603	618.5	615
	0.473	609	618	616.5
	0.474	606	617	612.5
	0.475	608	614	617
	0.476	609	617	616
	0.477	610	619	616
	0.478	607	617.5	615.5
	0.479	612	619.5	615
	0.48	608.5	617.5	616
	0.481	608.5	615.5	617.5
	0.482	607.5	619	617
	0.483	610	616.5	615
	0.484	609	612.5	618.5
	0.485	612.5	619	616
	0.486	610.5	617	617
	0.487	608	618.5	617.5
	0.488	606.5	617.5	620
	0.489	608.5	618	622
	0.49	612.5	618.5	616
	0.491	610.5	617	622
	0.492	609.5	620.5	622.5
	0.493	608.5	617	616
	0.494	608.5	618	619
	0.495	609	617.5	620.5
	0.496	609	620	622
	0.497	613.5	616.5	622.5
	0.498	612.5	619	620.5
	0.499	610.5	615.5	618.5
	0.5	611.5	621	624.5
	0.501	609.5	620.5	622.5
	0.502	615	617	621
	0.503	611.5	622.5	621.5
	0.504	613	618.5	620
	0.505	611.5	619.5	622
	0.506	613.5	616.5	622.5
	0.507	614.5	622	621
	0.508	614	620.5	623.5
	0.509	612	619.5	627.5
	0.51	613	620	626.5
	0.511	619	623.5	622.5
	0.512	615.5	619.5	626
	0.513	613	621	626
	0.514	615.5	619	627.5
	0.515	613	621	628
	0.516	616.5	622	625.5
	0.517	615	621.5	624
	0.518	614	621	625.5
	0.519	616	620	626.5
	0.52	615.5	622	628
	0.521	616	620	626.5
	0.522	615.5	622	624.5
	0.523	618.5	623.5	628.5
	0.524	616.5	618.5	630
	0.525	616.5	620	625.5
	0.526	614	620.5	628.5
	0.527	618	621.5	628.5
	0.528	617	620	628
	0.529	616	619.5	625
	0.53	617	622.5	629
	0.531	618	620	626.5
	0.532	619.5	620.5	628
	0.533	621	620	626
	0.534	619	620.5	626
	0.535	617	619	627
	0.536	617	620.5	628
	0.537	623.5	617.5	624.5
	0.538	618	620	626
	0.539	617	616.5	627.5
	0.54	622	620	627
	0.541	616	615.5	626
	0.542	616	620	626.5
	0.543	617	620	623.5
	0.544	618.5	616.5	623.5
	0.545	617	619.5	622.5
	0.546	616	619	625
	0.547	615.5	618.5	627.5
	0.548	616.5	619	621.5
	0.549	615	613.5	622.5
	0.55	619	615.5	623
	0.551	618.5	612	623.5
	0.552	617	615.5	622
	0.553	615.5	610.5	625.5
	0.554	616	614	624
	0.555	615.5	612.5	622
	0.556	614.5	615	622
	0.557	617	615	622
	0.558	616	616	620.5
	0.559	618.5	613.5	621
	0.56	619.5	617	622.5
	0.561	616	613.5	624.5
	0.562	615.5	618	620.5
	0.563	617	617	617
	0.564	617	614	622
	0.565	614	616	619
	0.566	617	614	618.5
	0.567	613.5	613	614
	0.568	611.5	615.5	619
	0.569	614	614	620.5
	0.57	616	617	619
	0.571	613.5	613.5	615.5
	0.572	615.5	611.5	616
	0.573	612.5	612.5	617
	0.574	613.5	613	619
	0.575	618.5	615.5	616.5
	0.576	614.5	613	618.5
	0.577	612.5	615.5	617.5
	0.578	611.5	615	616.5
	0.579	610.5	612.5	617
	0.58	615	615.5	617.5
	0.581	614.5	615.5	617
	0.582	612.5	614.5	615
	0.583	612.5	614	617
	0.584	615	613.5	618
	0.585	613	615.5	617
	0.586	609.5	614	615.5
	0.587	610.5	615	613.5
	0.588	611	618	614.5
	0.589	609	615.5	614.5
	0.59	609.5	613.5	615.5
	0.591	611	616.5	617
	0.592	609.5	614	616.5
	0.593	612	616.5	613
	0.594	613.5	615.5	612
	0.595	609	616	615.5
	0.596	612.5	616	615
	0.597	611.5	619	613
	0.598	607.5	617.5	615.5
	0.599	608.5	616.5	614.5
	0.6	606.5	618	613.5
	0.601	607	620	613
	0.602	611.5	617	613
	0.603	611.5	618.5	615.5
	0.604	607	618.5	610.5
	0.605	608.5	616	610.5
	0.606	610.5	617.5	611
	0.607	608.5	618.5	611.5
	0.608	610	618	609.5
	0.609	613	619.5	614
	0.61	611	616.5	612.5
	0.611	609.5	621	614.5
	0.612	605	621	608.5
	0.613	614	617	608.5
	0.614	614.5	619.5	611.5
	0.615	612.5	620.5	609.5
	0.616	611.5	620	609
	0.617	610.5	621	609
	0.618	610.5	620	609.5
	0.619	612.5	617	606
	0.62	613	619.5	610
	0.621	609.5	617	608.5
	0.622	612	618.5	608
	0.623	615.5	619	606
	0.624	615	617	606
	0.625	613	622	607
	0.626	611.5	623	607
	0.627	609.5	618.5	604.5
	0.628	611.5	620.5	607.5
	0.629	614	618.5	604
	0.63	612.5	620	604
	0.631	615.5	620	603
	0.632	616	616	605
	0.633	615	621	604.5
	0.634	614.5	619.5	602
	0.635	616.5	621.5	604
	0.636	616	622	601.5
	0.637	614.5	621	603
	0.638	617	620	606
	0.639	618.5	616.5	604.5
	0.64	617	616	605.5
	0.641	614.5	619	599.5
	0.642	618	618	604.5
	0.643	618	614.5	605
	0.644	612.5	617	604
	0.645	616.5	617	605
	0.646	620.5	617.5	605
	0.647	612	616.5	601.5
	0.648	618.5	615	603.5
	0.649	620	618.5	603.5
	0.65	611.5	618.5	606
	0.651	617	616	601.5
	0.652	618.5	614	605.5
	0.653	617	615	602
	0.654	618	616.5	605.5
	0.655	617.5	615.5	603
	0.656	617	614	602
	0.657	617	618.5	605.5
	0.658	620	617	605.5
	0.659	616	614	605.5
	0.66	618	615.5	604.5
	0.661	618.5	612	604.5
	0.662	616.5	615.5	602
	0.663	616.5	613	605
	0.664	620	613	602.5
	0.665	616.5	613	608
	0.666	617	612	609
	0.667	619	615.5	608.5
	0.668	617.5	612.5	605.5
	0.669	617	611.5	604.5
	0.67	615.5	614	607
	0.671	617	614.5	607.5
	0.672	617	610	609
	0.673	618	616	605.5
	0.674	616.5	613.5	608.5
	0.675	617	615.5	607
	0.676	621	615.5	608.5
	0.677	620	612	608
	0.678	615.5	613	607
	0.679	622.5	612.5	613
	0.68	619.5	616	609
	0.681	619	610.5	606
	0.682	619	613	609.5
	0.683	620.5	613	609.5
	0.684	622	615	613.5
	0.685	620	611.5	614
	0.686	617	614	611.5
	0.687	621.5	617	613
	0.688	620	616.5	609.5
	0.689	623.5	610	613.5
	0.69	618.5	612	614.5
	0.691	622	614.5	613.5
	0.692	621	613.5	613
	0.693	619.5	615	612.5
	0.694	622.5	617	613.5
	0.695	623	616	616
	0.696	622	615.5	619
	0.697	622	612	615.5
	0.698	622	615	611.5
	0.699	622.5	614.5	615.5
	0.7	622.5	614.5	614.5
	0.701	624.5	614	616.5
	0.702	620	614	617
	0.703	627.5	617	622
	0.704	623.5	614	613.5
	0.705	627.5	614	614.5
	0.706	625.5	616.5	619.5
	0.707	624.5	614	615.5
	0.708	625.5	613	613.5
	0.709	621	615.5	616.5
	0.71	625	613.5	615.5
	0.711	623	612.5	615.5
	0.712	621.5	614	614
	0.713	627	615.5	615
	0.714	627.5	617	615
	0.715	626.5	613	615.5
	0.716	624.5	615	617
	0.717	622	615.5	615
	0.718	623.5	618	615.5
	0.719	624	614.5	614
	0.72	627.5	615.5	618.5
	0.721	625	614.5	616.5
	0.722	627	613.5	617
	0.723	622.5	611	615.5
	0.724	627	615.5	614.5
	0.725	624.5	613.5	616
	0.726	623	612.5	618.5
	0.727	624	611	616.5
	0.728	623.5	615	618
	0.729	622	613.5	618
	0.73	626	615.5	615.5
	0.731	621	614.5	617
	0.732	623.5	614.5	621
	0.733	625.5	616	617
	0.734	625	616.5	614
	0.735	625	616	617
	0.736	625.5	616.5	617
	0.737	625	616	615.5
	0.738	622.5	617	616
	0.739	625.5	615.5	615
	0.74	621	616	612.5
	0.741	620.5	615.5	614
	0.742	622.5	615	617
	0.743	622.5	616	616.5
	0.744	621.5	613	613.5
	0.745	621.5	615	615.5
	0.746	623.5	617	616
	0.747	623	615.5	616
	0.748	622	615.5	616
	0.749	622	615.5	614.5
	0.75	623.5	618.5	615
	0.751	620	616	614
	0.752	617.5	615	616.5
	0.753	622	617.5	616.5
	0.754	622	616.5	617
	0.755	617	616	613.5
	0.756	620.5	615	615.5
	0.757	618.5	610.5	615.5
	0.758	621	616.5	619
	0.759	619	617	614.5
	0.76	618.5	614.5	616.5
	0.761	615	618	617
	0.762	616.5	612.5	619.5
	0.763	615.5	616.5	616.5
	0.764	616	615	616.5
	0.765	617	617	621.5
	0.766	617.5	617	617
	0.767	615.5	614	614.5
	0.768	614.5	614.5	621.5
	0.769	616	615.5	616.5
	0.77	612	617	619.5
	0.771	614.5	614.5	620
	0.772	615.5	615.5	620
	0.773	612.5	616	620
	0.774	613.5	615.5	620
	0.775	610	615.5	620
	0.776	611.5	614	617.5
	0.777	610.5	615	619.5
	0.778	609	614	620.5
	0.779	614.5	615.5	622.5
	0.78	609	615.5	616.5
	0.781	609.5	614	622
	0.782	613.5	618	622.5
	0.783	610	615.5	622.5
	0.784	611	615.5	622.5
	0.785	609.5	613.5	621
	0.786	608.5	614.5	622
	0.787	613.5	616.5	620.5
	0.788	610	616	619.5
	0.789	608.5	611.5	621.5
	0.79	609	614	619
	0.791	608	614.5	622.5
	0.792	606.5	614	623.5
	0.793	607.5	616	621.5
	0.794	609.5	614	619.5
	0.795	608.5	615.5	620.5
	0.796	611	613.5	617
	0.797	608.5	613.5	617
	0.798	609.5	611.5	621
	0.799	608	614.5	619
	0.8	607.5	614.5	620
	0.801	608	617	618
	0.802	608	617	619
	0.803	613	615.5	616.5
	0.804	609	611.5	616.5
	0.805	607.5	616	615
	0.806	609	614.5	615.5
	0.807	607.5	615.5	617
	0.808	608	612	613.5
	0.809	608.5	616	616.5
	0.81	610	615	612.5
	0.811	609	614.5	614
	0.812	610	614.5	615.5
	0.813	611	615.5	612.5
	0.814	606.5	617	609.5
	0.815	611.5	617	611.5
	0.816	608.5	617	614
	0.817	606	617	613
	0.818	611	614.5	608.5
	0.819	611	615	614.5
	0.82	609.5	616	611
	0.821	611.5	617.5	609.5
	0.822	613.5	617	607
	0.823	612	615.5	614
	0.824	611	615	613
	0.825	614.5	614.5	609.5
	0.826	612	615	609
	0.827	608.5	616	611.5
	0.828	614	619	608
	0.829	613.5	616.5	608.5
	0.83	614.5	615	604
	0.831	615	617	608
	0.832	613.5	618	605.5
	0.833	615	617	605.5
	0.834	615	621	609.5
	0.835	614.5	615.5	608.5
	0.836	614.5	618	609.5
	0.837	616.5	617	607
	0.838	615	616.5	610.5
	0.839	615.5	618	609.5
	0.84	616	621	609
	0.841	611.5	618	607.5
	0.842	615	619.5	607
	0.843	615.5	619.5	607.5
	0.844	614.5	618	607
	0.845	617.5	620	609.5
	0.846	614	617	608.5
	0.847	615.5	621	605.5
	0.848	614.5	622.5	604.5
	0.849	618	622	611.5
	0.85	618.5	618	608.5
	0.851	615.5	622	612
	0.852	620.5	621	609
	0.853	618.5	626.5	608
	0.854	616	621.5	613
	0.855	616.5	621.5	611.5
	0.856	617	622	613
	0.857	615	619.5	612
	0.858	618.5	620	611.5
	0.859	617	622	613.5
	0.86	617	620	612.5
	0.861	617	622	615
	0.862	617	621	612
	0.863	613	623	614
	0.864	616.5	623	610
	0.865	615.5	617.5	616.5
	0.866	615.5	618.5	617
	0.867	617	619	615.5
	0.868	612	619.5	616.5
	0.869	618	615.5	615.5
	0.87	618	619.5	616.5
	0.871	618	619	617
	0.872	617	621	616
	0.873	614.5	616	615.5
	0.874	617	617	618.5
	0.875	617.5	620.5	617.5
	0.876	616.5	615.5	617.5
	0.877	615.5	620	616.5
	0.878	616.5	616.5	617
	0.879	615.5	619.5	615.5
	0.88	618.5	615.5	615
	0.881	615.5	618	619
	0.882	615	617	617
	0.883	615.5	615.5	616
	0.884	620.5	614.5	617
	0.885	615.5	614.5	617.5
	0.886	616	615.5	615.5
	0.887	615	615.5	616
	0.888	620	617	617
	0.889	616.5	617	619
	0.89	618	613	620.5
	0.891	617	610.5	616
	0.892	620	615.5	618.5
	0.893	616.5	614.5	619
	0.894	615.5	614.5	618.5
	0.895	618.5	609.5	616.5
	0.896	621.5	609.5	615.5
	0.897	617	613	620
	0.898	619.5	614.5	615
	0.899	618	612.5	617
	0.9	622	610	614.5
	0.901	618.5	609.5	615.5
	0.902	621	610.5	617
	0.903	617	612.5	618
	0.904	621.5	605	614
	0.905	619.5	610.5	618.5
	0.906	621	609.5	618.5
	0.907	623.5	606	612
	0.908	622.5	608.5	615.5
	0.909	621	611	616
	0.91	623	608.5	615.5
	0.911	622	607.5	615.5
	0.912	619.5	610.5	614
	0.913	622	608	612
	0.914	620	608.5	613
	0.915	622	610	613
	0.916	621	611	613
	0.917	624	609.5	613.5
	0.918	622.5	611.5	613
	0.919	624	609	611.5
	0.92	622	608.5	613.5
	0.921	622	610	609.5
	0.922	623.5	608	609.5
	0.923	624	610.5	610.5
	0.924	620	610	613
	0.925	624.5	611	611
	0.926	620	610	611.5
	0.927	621	609	609
	0.928	621	610.5	611
	0.929	622.5	611	611
	0.93	622.5	610.5	612.5
	0.931	618.5	611.5	611
	0.932	622.5	611	609
	0.933	623	611.5	608
	0.934	622	610.5	610.5
	0.935	623	608.5	608.5
	0.936	622	612.5	608.5
	0.937	622	614	608.5
	0.938	620	612.5	609.5
	0.939	623.5	612	607
	0.94	621.5	616	609.5
	0.941	623.5	616	608.5
	0.942	621	612	608
	0.943	626	612	607.5
	0.944	620	612	610
	0.945	622	614	607.5
	0.946	621	616.5	609
	0.947	621.5	615.5	609.5
	0.948	623	617	608.5
	0.949	616	614.5	608
	0.95	620.5	615	609
	0.951	622.5	612	608
	0.952	619.5	616.5	609.5
	0.953	621	615	611
	0.954	620	615.5	608.5
	0.955	618.5	616	608.5
	0.956	620	619	609
	0.957	622.5	620.5	606.5
	0.958	616	617	609
	0.959	622	619	607.5
	0.96	618.5	618	610
	0.961	622.5	618.5	610
	0.962	619	618.5	613
	0.963	615.5	617	612.5
	0.964	615.5	619	613.5
	0.965	619.5	620	612
	0.966	617	618	609
	0.967	616	617	611.5
	0.968	619.5	617	615
	0.969	618.5	620.5	613
	0.97	615.5	618	611
	0.971	616.5	620.5	611.5
	0.972	614.5	618.5	614.5
	0.973	617	612	614.5
	0.974	616	614	612
	0.975	613.5	617	615.5
	0.976	615.5	615.5	613
	0.977	616.5	617	618
	0.978	615.5	616	615
	0.979	614.5	615	614.5
	0.98	615	615.5	615.5
	0.981	616	614.5	617
	0.982	613.5	615	615
	0.983	612.5	615	622
	0.984	615	613.5	618
	0.985	610.5	612.5	617
	0.986	615	613.5	618.5
	0.987	612.5	613.5	620
	0.988	611.5	612	619
	0.989	612.5	613.5	620.5
	0.99	614	614	618
	0.991	614.5	615.5	619.5
	0.992	609.5	612	620.5
	0.993	612.5	612.5	621
	0.994	612.5	610.5	618
	0.995	610	610.5	622.5
	0.996	611	611.5	621
	0.997	614	613.5	619
	0.998	612	614	618
	0.999	612	612.5	621
	1	612.5	610.5	622.5
	1.001	613	614.5	619
	1.002	609.5	611.5	619
	1.003	614.5	612.5	618.5
	1.004	611.5	612	617
	1.005	614	608.5	618.5
	1.006	611.5	608.5	616
	1.007	613.5	609	617
	1.008	610.5	609.5	616
	1.009	614.5	608	619
	1.01	613	609.5	620
	1.011	613.5	609	619
	1.012	611	609.5	620
	1.013	614	610	616.5
	1.014	614.5	610.5	618.5
	1.015	610.5	609	616.5
	1.016	613	609.5	613.5
	1.017	614.5	609	614.5
	1.018	612	609	617
	1.019	614.5	609	617
	1.02	611.5	612	616
	1.021	615	609.5	619
	1.022	613	606.5	614.5
	1.023	614.5	610.5	618
	1.024	613.5	608.5	616.5
	1.025	612	609	614.5
	1.026	614	608	615
	1.027	614.5	607.5	614.5
	1.028	615.5	608.5	611.5
	1.029	615	608	614
	1.03	613	609	613.5
	1.031	614.5	607	613.5
	1.032	615	610.5	611.5
	1.033	614.5	608	615.5
	1.034	615.5	609	615
	1.035	614	609	614.5
	1.036	614.5	607.5	618.5
	1.037	614.5	609	616
	1.038	614.5	607	615.5
	1.039	616.5	609.5	614.5
	1.04	615	610.5	613.5
	1.041	618.5	610	614
	1.042	616.5	609.5	617
	1.043	614.5	613.5	614
	1.044	618	614	618
	1.045	617	610.5	611.5
	1.046	618.5	608.5	611.5
	1.047	613.5	615.5	612.5
	1.048	615.5	610.5	617.5
	1.049	616	613	614
	1.05	615.5	613	616.5
	1.051	614.5	611	618
	1.052	617	616.5	615.5
	1.053	615.5	612	615.5
	1.054	619	613	614
	1.055	616.5	614.5	616.5
	1.056	615.5	616.5	616
	1.057	617.5	616	616.5
	1.058	615.5	617	617
	1.059	615	611	617
	1.06	615.5	617	616.5
	1.061	613	614	618.5
	1.062	615.5	617	615.5
	1.063	613.5	615.5	617
	1.064	611.5	617	618.5
	1.065	613.5	614.5	614.5
	1.066	611.5	617	615.5
	1.067	613.5	617.5	619.5
	1.068	610.5	618.5	619
	1.069	613.5	613.5	616
	1.07	612	614.5	614.5
	1.071	611	619.5	618
	1.072	611.5	619.5	615
	1.073	615.5	617	616.5
	1.074	609	619.5	616.5
	1.075	613.5	616.5	615.5
	1.076	615.5	620	620.5
	1.077	613	619.5	613.5
	1.078	611	619	617
	1.079	614	615.5	615.5
	1.08	613.5	617	615.5
	1.081	610	621	614
	1.082	609.5	615.5	616.5
	1.083	609.5	617.5	616.5
	1.084	609.5	618.5	618
	1.085	610	621	619
	1.086	610.5	617.5	615
	1.087	608.5	614.5	613
	1.088	611.5	617	617
	1.089	610.5	616.5	614.5
	1.09	611	616	619
	1.091	610.5	616.5	615.5
	1.092	609.5	615.5	617
	1.093	614	615	613.5
	1.094	611	622	614.5
	1.095	609.5	618	617
	1.096	607	612	610.5
	1.097	606	616.5	615
	1.098	610.5	613.5	614
	1.099	609	616.5	618
	1.1	611	613	615
	1.101	609	615.5	614
	1.102	611	613.5	614.5
	1.103	609.5	613	615.5
	1.104	609.5	615.5	615
	1.105	609	613.5	615.5
	1.106	611.5	612.5	616.5
	1.107	608.5	613.5	616.5
	1.108	611.5	614.5	616
	1.109	610.5	616	615.5
	1.11	610.5	611.5	615.5
	1.111	609.5	617	611
	1.112	613.5	613	609.5
	1.113	614	619.5	614.5
	1.114	612.5	613	617
	1.115	615.5	612	613.5
	1.116	612.5	611.5	613.5
	1.117	614	616	612
	1.118	616	612.5	612
	1.119	615.5	614.5	616
	1.12	613	612	612.5
	1.121	613.5	618.5	613.5
	1.122	615.5	611.5	614.5
	1.123	615.5	608	611
	1.124	616	613.5	616
	1.125	613.5	616	616.5
	1.126	615	611.5	616.5
	1.127	615.5	614.5	617
	1.128	614.5	613.5	612.5
	1.129	615.5	614.5	613.5
	1.13	619	611.5	615
	1.131	616	609	616.5
	1.132	617	615.5	613.5
	1.133	617	615	615.5
	1.134	617	614.5	615.5
	1.135	620	614	614
	1.136	617	611.5	615.5
	1.137	620.5	611.5	616.5
	1.138	617	609.5	614.5
	1.139	620.5	612.5	617
	1.14	620.5	613.5	613.5
	1.141	619.5	610.5	616.5
	1.142	619	611.5	615
	1.143	616.5	612	617
	1.144	618	613.5	616.5
	1.145	615.5	613.5	616.5
	1.146	617.5	612	617
	1.147	616	611	621.5
	1.148	621	613.5	619.5
	1.149	617.5	614	620
	1.15	619.5	613	617
	1.151	617	613	619
	1.152	617.5	612	619.5
	1.153	619.5	611.5	622.5
	1.154	620.5	614	621.5
	1.155	617	610	620
	1.156	616	612	617
	1.157	618.5	611.5	619
	1.158	618.5	612.5	617
	1.159	622	613.5	622
	1.16	618.5	614.5	622
	1.161	617	613.5	621
	1.162	622	615.5	620
	1.163	617	617	621
	1.164	617	614	620.5
	1.165	620	613.5	617
	1.166	617	613	619.5
	1.167	617.5	617	622.5
	1.168	618	614.5	620
	1.169	619	614	621
	1.17	616	616	618.5
	1.171	615.5	619.5	620
	1.172	616.5	615.5	619.5
	1.173	614.5	615.5	620
	1.174	619.5	615.5	620.5
	1.175	616	615.5	618
	1.176	617	617	624.5
	1.177	617	615.5	618
	1.178	615.5	615.5	619
	1.179	616	617	615.5
	1.18	616.5	614.5	618
	1.181	620.5	619	619.5
	1.182	618.5	618.5	618.5
	1.183	619.5	616	622.5
	1.184	621	615.5	617
	1.185	617	615.5	618.5
	1.186	617.5	620	615
	1.187	619	617	619
	1.188	621.5	618.5	620
	1.189	617	618.5	618
	1.19	618.5	618.5	615
	1.191	616.5	618	613
	1.192	615.5	618	617.5
	1.193	619	617	617
	1.194	615.5	617	619
	1.195	619	617	614.5
	1.196	618.5	620	617
	1.197	618.5	615.5	615.5
	1.198	618.5	615.5	615.5
	1.199	619.5	616.5	615
	1.2	617	615.5	615.5
	1.201	616.5	617	617
	1.202	621.5	615	619.5
	1.203	615.5	620	619
	1.204	619.5	621	616
	1.205	616	619.5	615.5
	1.206	621	619	614.5
	1.207	618	616.5	618
	1.208	616	619.5	615
	1.209	619.5	618.5	615
	1.21	619.5	617	616.5
	1.211	619	617.5	615
	1.212	617	618	614.5
	1.213	621.5	618.5	615.5
	1.214	618	617.5	615.5
	1.215	620	619	615
	1.216	618	615.5	618.5
	1.217	620.5	618.5	615
	1.218	619	616.5	617.5
	1.219	620.5	617	615
	1.22	621.5	622	617
	1.221	618.5	616.5	616.5
	1.222	621	620	615.5
	1.223	620.5	621.5	618
	1.224	620.5	616.5	620
	1.225	616.5	619.5	616
	1.226	620.5	621	616
	1.227	622	619.5	616
	1.228	621	618	616
	1.229	620.5	616	615.5
	1.23	618	619.5	616.5
	1.231	619	620	615.5
	1.232	622	620	617
	1.233	619.5	614	618
	1.234	620	617	618
	1.235	621	619.5	615.5
	1.236	618	617	615
	1.237	619.5	618	617
	1.238	615.5	618.5	617
	1.239	623.5	616.5	615
	1.24	616.5	618	616
	1.241	621.5	617	615.5
	1.242	621	617	613
	1.243	623.5	619	618
	1.244	617	616	618.5
	1.245	617	617	616
	1.246	620.5	617	620
	1.247	622.5	617	614.5
	1.248	621	621	614
	1.249	621.5	617.5	615.5
	1.25	618.5	619	616.5
	1.251	617	617	616
	1.252	617	619.5	616.5
	1.253	616.5	621	618.5
	1.254	622	619.5	617
	1.255	618.5	614.5	615.5
	1.256	618.5	614.5	614
	1.257	616.5	617.5	618
	1.258	619.5	616.5	617
	1.259	617	617	617.5
	1.26	616.5	616.5	616.5
	1.261	621	618	617
	1.262	620	617.5	616
	1.263	616.5	617	616
	1.264	616.5	617	614.5
	1.265	616.5	619.5	614
	1.266	617.5	616	613
	1.267	616.5	615.5	615
	1.268	614	616	613.5
	1.269	616.5	616.5	613
	1.27	617	615.5	614.5
	1.271	614	616.5	613.5
	1.272	619.5	616.5	614.5
	1.273	616.5	617	611.5
	1.274	621	616	614
	1.275	615.5	618.5	610.5
	1.276	618	619.5	616
	1.277	617	616.5	612.5
	1.278	617.5	620	611.5
	1.279	616.5	616.5	613
	1.28	616.5	621.5	609.5
	1.281	615	620	612.5
	1.282	615	619.5	608.5
	1.283	615.5	619	613.5
	1.284	619.5	618.5	610.5
	1.285	615.5	620	610.5
	1.286	619.5	619.5	609.5
	1.287	619	622.5	609
	1.288	615.5	621	607.5
	1.289	620	622	610.5
	1.29	618.5	619.5	610
	1.291	616.5	619.5	609
	1.292	617	620	610
	1.293	617	617	605.5
	1.294	616	621	607.5
	1.295	613	617.5	611.5
	1.296	617	620	611
	1.297	616	619.5	608.5
	1.298	614.5	621	611
	1.299	613.5	620.5	610.5
	1.3	616	623	609.5
	1.301	615.5	618	607
	1.302	617	618	611.5
	1.303	615.5	620	610
	1.304	616	616.5	612
	1.305	615.5	619	610
	1.306	617	615.5	610.5
	1.307	615.5	616	611.5
	1.308	614.5	616	612
	1.309	620.5	618.5	614.5
	1.31	618	619	615
	1.311	616	618.5	613
	1.312	617	613.5	613
	1.313	618.5	618	611.5
	1.314	616.5	614.5	615.5
	1.315	615.5	618	617
	1.316	617	618	615
	1.317	618.5	614.5	616
	1.318	617	615.5	618.5
	1.319	617	616.5	615.5
	1.32	617	616	616
	1.321	618	616	619
	1.322	617	614	619
	1.323	614	614.5	619
	1.324	617	614.5	621
	1.325	618.5	611	620
	1.326	616.5	612.5	622
	1.327	618	615	621
	1.328	617	614	623
	1.329	621	609.5	623.5
	1.33	620	612.5	622.5
	1.331	620	612.5	622
	1.332	621	612.5	624.5
	1.333	615.5	612	624.5
	1.334	621	615.5	624.5
	1.335	620.5	614	627
	1.336	620.5	612.5	625
	1.337	621.5	606	629
	1.338	621	608.5	630.5
	1.339	621	613	627.5
	1.34	621.5	611	628.5
	1.341	620	612	631
	1.342	620	606.5	630.5
	1.343	621.5	610	627.5
	1.344	620.5	612.5	630.5
	1.345	622.5	610.5	634
	1.346	624.5	608.5	632
	1.347	622.5	614	630
	1.348	621	612.5	635
	1.349	622	609.5	636
	1.35	623	609.5	635
	1.351	625	611	635.5
	1.352	622	610.5	635.5
	1.353	620.5	614	636.5
	1.354	623.5	611.5	636.5
	1.355	622	617	636
	1.356	624.5	613	639.5
	1.357	621	616.5	637
	1.358	624.5	613.5	636
	1.359	623	615.5	638.5
	1.36	623.5	614.5	637.5
	1.361	625.5	615.5	638.5
	1.362	624.5	619.5	641
	1.363	622.5	614	636
	1.364	624.5	615.5	639.5
	1.365	624	617	639
	1.366	625.5	618.5	639
	1.367	624.5	616	642
	1.368	624	620	639.5
	1.369	622	618.5	639
	1.37	623.5	616.5	639.5
	1.371	623.5	618.5	636
	1.372	627	618.5	639.5
	1.373	624.5	619	640.5
	1.374	623.5	615	639.5
	1.375	621.5	619	637.5
	1.376	625	619	640
	1.377	622.5	619.5	638.5
	1.378	622.5	619	641.5
	1.379	624.5	621	635
	1.38	622.5	620	636
	1.381	624	617	637.5
	1.382	619.5	617	636
	1.383	619	618	637
	1.384	622.5	619.5	636
	1.385	622	618.5	634.5
	1.386	620.5	619.5	635.5
	1.387	625.5	619	630
	1.388	621	618.5	631
	1.389	622	619	631.5
	1.39	617	618	630
	1.391	621.5	618.5	632
	1.392	619	617	629
	1.393	620	614	628.5
	1.394	618.5	618.5	625
	1.395	625.5	615	626.5
	1.396	619.5	616	629.5
	1.397	620	621	622.5
	1.398	620	614	623.5
	1.399	619	617	622.5
	1.4	622	617	622
	1.401	618.5	615.5	621
	1.402	622	614	620
	1.403	618.5	614.5	621.5
	1.404	618.5	613.5	617.5
	1.405	622	616	619
	1.406	622	616	620.5
	1.407	621	615.5	617.5
	1.408	619	615	618.5
	1.409	621	614.5	615
	1.41	621	615	614.5
	1.411	622	615	615.5
	1.412	626	609	616
	1.413	620.5	610	614
	1.414	621	612	611.5
	1.415	622.5	614	610.5
	1.416	625.5	612.5	611.5
	1.417	622	610.5	610.5
	1.418	621.5	611.5	614.5
	1.419	624.5	612	610.5
	1.42	622.5	611	611
	1.421	625	607.5	610
	1.422	625	611	608
	1.423	622	612	609.5
	1.424	624.5	609.5	607
	1.425	624	610	609
	1.426	624	613.5	609.5
	1.427	626	610.5	607.5
	1.428	627	609	609.5
	1.429	627.5	611.5	608.5
	1.43	626.5	610.5	605
	1.431	624.5	609.5	607.5
	1.432	626.5	611	610
	1.433	625.5	609.5	607
	1.434	626	610.5	606
	1.435	624	612	608
	1.436	627	613.5	608.5
	1.437	628	611	608
	1.438	628.5	614.5	607
	1.439	627	615	609.5
	1.44	625.5	611	607.5
	1.441	626	613	607.5
	1.442	627.5	615	606.5
	1.443	629.5	615.5	608.5
	1.444	627	617	606.5
	1.445	628	618	606.5
	1.446	626	612.5	602
	1.447	629	615.5	604
	1.448	627.5	615	606
	1.449	626	618	602
	1.45	628.5	611	603.5
	1.451	629	619.5	605
	1.452	626	621.5	600.5
	1.453	623.5	622	602
	1.454	627.5	620	605.5
	1.455	624.5	622	601.5
	1.456	626.5	621	607
	1.457	622	620	601
	1.458	629	622	601
	1.459	624.5	623	598.5
	1.46	622.5	623	600.5
	1.461	622.5	624	598
	1.462	624	625	597.5
	1.463	624.5	624.5	599.5
	1.464	620.5	622.5	594.5
	1.465	622	628.5	601.5
	1.466	619.5	623	596
	1.467	622.5	624.5	596.5
	1.468	620.5	627	596.5
	1.469	621	629	595
	1.47	618.5	628.5	595
	1.471	617.5	629	595
	1.472	616.5	631	593.5
	1.473	615.5	631.5	592.5
	1.474	618	630	593
	1.475	615.5	627.5	587.5
	1.476	612.5	630	587.5
	1.477	611.5	632	590.5
	1.478	611.5	632	587.5
	1.479	611.5	633	588.5
	1.48	608.5	626.5	586.5
	1.481	608	632	583
	1.482	606	632	585
	1.483	607.5	634	583
	1.484	601.5	632	582
	1.485	603	633	582
	1.486	598	635	576.5
	1.487	597	634.5	577.5
	1.488	597.5	635	578
	1.489	595.5	631.5	575
	1.49	594.5	634.5	575
	1.491	593.5	634.5	574.5
	1.492	595	636	574.5
	1.493	589.5	632	572.5
	1.494	588.5	634.5	569.5
	1.495	587.5	631.5	573.5
	1.496	587.5	634.5	570.5
	1.497	587	629	566.5
	1.498	585	634	567
	1.499	583.5	633.5	564
	1.5	582.5	634	564.5
	1.501	580.5	629.5	562
	1.502	581	635	561
	1.503	575.5	632	560.5
	1.504	579.5	632	563
	1.505	576.5	633.5	560
	1.506	575.5	634.5	557
	1.507	571	633	557.5
	1.508	574.5	637	554
	1.509	568.5	636.5	550.5
	1.51	571.5	632	553
	1.511	569	632	550
	1.512	568.5	636.5	549
	1.513	564.5	636	548.5
	1.514	567.5	636	544.5
	1.515	563	633	544
	1.516	561.5	632	542.5
	1.517	562	636	540.5
	1.518	565.5	634.5	539
	1.519	561.5	636	539.5
	1.52	560	635	536
	1.521	562.5	636	535
	1.522	560.5	635	533
	1.523	561.5	636.5	532.5
	1.524	560	635.5	530.5
	1.525	559	634.5	529
	1.526	558.5	635	527
	1.527	557.5	635	523
	1.528	557	635.5	522.5
	1.529	557.5	636	519
	1.53	557.5	633.5	517
	1.531	556.5	634	516
	1.532	557.5	636	515
	1.533	555.5	632	511.5
	1.534	552	634	507
	1.535	555.5	634.5	506
	1.536	554	632	501.5
	1.537	553	633.5	500
	1.538	552.5	632	497
	1.539	552	634.5	497.5
	1.54	550.5	634	493
	1.541	549	631	490
	1.542	546	630	486
	1.543	546.5	629	482.5
	1.544	547.5	626.5	481.5
	1.545	546	629	476
	1.546	545.5	629	470.5
	1.547	547.5	628.5	468
	1.548	542	626.5	465
	1.549	545	625	460.5
	1.55	541.5	627	457
	1.551	539.5	624	455.5
	1.552	536.5	622	449.5
	1.553	539	623	445.5
	1.554	536.5	618.5	441.5
	1.555	532.5	620	437.5
	1.556	535	618	433
	1.557	533.5	619.5	428
	1.558	531.5	620	427.5
	1.559	527.5	616.5	419.5
	1.56	532.5	615.5	415.5
	1.561	527.5	614	411.5
	1.562	532.5	615.5	406
	1.563	530.5	612.5	401
	1.564	525.5	612	396.5
	1.565	527.5	610.5	396.5
	1.566	527.5	609.5	392
	1.567	531	608.5	384
	1.568	527.5	608.5	380
	1.569	530.5	605.5	376
	1.57	527.5	603.5	371.5
	1.571	531	603	368.5
	1.572	527.5	603.5	369
	1.573	531.5	601.5	360
	1.574	527.5	598	359
	1.575	527.5	597	352
	1.576	527.5	597	345
	1.577	527.5	597.5	344.5
	1.578	529.5	595	340.5
	1.579	532.5	594.5	335
	1.58	531.5	587.5	331
	1.581	530	591	329.5
	1.582	530	587.5	322.5
	1.583	530.5	592.5	320.5
	1.584	533	585.5	318.5
	1.585	527.5	587.5	316.5
	1.586	530.5	584.5	310
	1.587	530.5	583.5	310
	1.588	527.5	583.5	308
	1.589	529.5	580	301
	1.59	526	577	298.5
	1.591	524.5	581	296.5
	1.592	526.5	573.5	293.5
	1.593	526	577.5	287.5
	1.594	521.5	572.5	287.5
	1.595	522.5	573.5	283
	1.596	517	570	280
	1.597	516.5	571	277
	1.598	516.5	568	276
	1.599	516.5	568	271.5
	1.6	514.5	568.5	271.5
	1.601	509	564.5	266.5
	1.602	512.5	564	265.5
	1.603	504	565	262
	1.604	505.5	563	257.5
	1.605	505	559.5	253
	1.606	498	560	254.5
	1.607	496.5	559.5	251
	1.608	491	557.5	248
	1.609	487	557	249.5
	1.61	483	554	244
	1.611	482	556	240
	1.612	474	553.5	238
	1.613	472.5	552	237
	1.614	467	550.5	235.5
	1.615	468	546	233.5
	1.616	460	547.5	230.5
	1.617	455	546.5	229.5
	1.618	453	544.5	226
	1.619	450.5	542.5	222
	1.62	446.5	542	220
	1.621	441	540	219
	1.622	434.5	538.5	215.5
	1.623	430.5	538	212
	1.624	425	537	213.5
	1.625	422.5	534.5	211
	1.626	420.5	532.5	208.5
	1.627	414	532	208.5
	1.628	408.5	527.5	208.5
	1.629	406	531	206
	1.63	401	527.5	205
	1.631	396	527.5	204.5
	1.632	393	523	201
	1.633	386.5	519.5	198
	1.634	385	517.5	197.5
	1.635	376	517	197.5
	1.636	374	517	195.5
	1.637	367.5	514.5	193.5
	1.638	363	511	192
	1.639	359	511	192
	1.64	357.5	507.5	191.5
	1.641	351.5	506	191.5
	1.642	348.5	502.5	190.5
	1.643	342	501.5	190
	1.644	342.5	497	189.5
	1.645	336	498	188.5
	1.646	332	492.5	187
	1.647	329	494	187
	1.648	328.5	489	191
	1.649	323.5	488.5	187
	1.65	322	485.5	184
	1.651	318	485.5	186.5
	1.652	315	481.5	184.5
	1.653	310.5	478.5	187.5
	1.654	309.5	470	187.5
	1.655	303.5	473	185.5
	1.656	302.5	471	184.5
	1.657	299.5	465.5	188
	1.658	295.5	464	185
	1.659	296	457.5	186.5
	1.66	292	460.5	187.5
	1.661	285.5	454.5	186
	1.662	286.5	452	185.5
	1.663	284.5	445.5	184.5
	1.664	280	440.5	185
	1.665	275.5	442	187.5
	1.666	274	438	186
	1.667	272.5	434.5	190
	1.668	271	427	190.5
	1.669	269.5	425	194
	1.67	264	421	193.5
	1.671	261	415.5	189.5
	1.672	261	412.5	191.5
	1.673	256.5	410.5	191.5
	1.674	253	403.5	193
	1.675	251.5	400.5	193.5
	1.676	253	396.5	196
	1.677	250	392	197
	1.678	244.5	389.5	196
	1.679	243.5	383	199.5
	1.68	241.5	374	198
	1.681	242	376	199.5
	1.682	238	369	201.5
	1.683	235.5	368.5	205
	1.684	236.5	364	203.5
	1.685	233.5	361.5	207
	1.686	230	353.5	208.5
	1.687	228.5	351	212
	1.688	224.5	344	211
	1.689	225	341	213
	1.69	224	335.5	218
	1.691	223	330	216.5
	1.692	220	327.5	216
	1.693	218.5	323	218.5
	1.694	214	320	221.5
	1.695	215.5	316.5	220.5
	1.696	212.5	307.5	220.5
	1.697	213	306.5	222
	1.698	210.5	302.5	227
	1.699	208.5	299.5	228.5
	1.7	208.5	294	225.5
	1.701	207	289	227.5
	1.702	205	285.5	229.5
	1.703	204	283.5	232
	1.704	200.5	278	232.5
	1.705	199.5	277.5	235
	1.706	198	269.5	235.5
	1.707	198	268.5	232.5
	1.708	196.5	266.5	238.5
	1.709	197	261	238.5
	1.71	193	262.5	240
	1.711	196.5	258.5	242
	1.712	190.5	250	241
	1.713	192	246	246
	1.714	190	246.5	243.5
	1.715	191.5	242.5	249
	1.716	191.5	237	248.5
	1.717	188.5	239.5	249
	1.718	185.5	234.5	247
	1.719	188.5	230	249.5
	1.72	187.5	230	254
	1.721	184.5	225.5	255.5
	1.722	182.5	221.5	259.5
	1.723	183.5	220	261
	1.724	182.5	219	261.5
	1.725	186.5	218	266
	1.726	182.5	213.5	266.5
	1.727	186	214.5	270
	1.728	183	208.5	270.5
	1.729	183.5	210	273.5
	1.73	182	210.5	273
	1.731	182	207	282
	1.732	184.5	202.5	279.5
	1.733	182.5	201	281.5
	1.734	186	197	286.5
	1.735	183	197	287.5
	1.736	181	197	288
	1.737	184.5	193.5	289
	1.738	183.5	192	297.5
	1.739	187.5	192	298
	1.74	187	188.5	300
	1.741	184	191.5	302
	1.742	184	187	309
	1.743	190	188.5	306.5
	1.744	187	183	310
	1.745	189	184.5	314.5
	1.746	187	188	318
	1.747	187	183.5	319
	1.748	189	181.5	321.5
	1.749	191.5	182	327.5
	1.75	190.5	181	330
	1.751	189.5	184	331
	1.752	193	177.5	334.5
	1.753	191.5	177.5	339.5
	1.754	193	176.5	344.5
	1.755	194	172	347
	1.756	195.5	178	351
	1.757	197.5	175	357.5
	1.758	199.5	179	365.5
	1.759	199.5	174	366
	1.76	200.5	178	370
	1.761	206.5	177	373.5
	1.762	208.5	177.5	379
	1.763	209	175	388
	1.764	211	175.5	393
	1.765	209	173	397
	1.766	210.5	176.5	403.5
	1.767	214.5	177.5	408
	1.768	215.5	179.5	415
	1.769	218	174	421.5
	1.77	217.5	177.5	428.5
	1.771	217	180	437.5
	1.772	218	177.5	445
	1.773	223	181.5	447.5
	1.774	223	181	458.5
	1.775	225	179.5	464.5
	1.776	220.5	182.5	472.5
	1.777	223	184	477.5
	1.778	225.5	183	487.5
	1.779	230.5	183.5	495
	1.78	227.5	186	502.5
	1.781	227	185.5	512
	1.782	235	185	523
	1.783	237	190	527.5
	1.784	238	190	539.5
	1.785	243.5	190	539
	1.786	245.5	191.5	554
	1.787	246	194.5	559.5
	1.788	252	189.5	571.5
	1.789	255.5	191.5	578
	1.79	258.5	193.5	587
	1.791	263.5	195	599.5
	1.792	267	198	608.5
	1.793	267	195.5	617
	1.794	272	201.5	625.5
	1.795	274	201.5	635
	1.796	278	204	642
	1.797	283	204.5	650.5
	1.798	283.5	203.5	658
	1.799	291.5	202.5	665.5
	1.8	292	209.5	676.5
	1.801	292	209.5	680.5
	1.802	298.5	216	686.5
	1.803	302.5	214.5	697.5
	1.804	306.5	219.5	705
	1.805	306	221	712.5
	1.806	314	224	719.5
	1.807	314.5	225	725.5
	1.808	321.5	227.5	734.5
	1.809	324	229.5	737
	1.81	328	229.5	744
	1.811	332	232.5	750.5
	1.812	336.5	236.5	757
	1.813	340.5	237.5	761
	1.814	346.5	246	765
	1.815	348	248.5	769.5
	1.816	361	251	774.5
	1.817	367.5	253.5	776.5
	1.818	369	256.5	784
	1.819	380.5	265	781
	1.82	384.5	266.5	791.5
	1.821	390.5	274	794
	1.822	398.5	277	794.5
	1.823	408.5	281	796
	1.824	414.5	282	806.5
	1.825	423	284.5	807.5
	1.826	430.5	292.5	811
	1.827	443.5	294	814.5
	1.828	452.5	298.5	816
	1.829	463	301.5	817.5
	1.83	471.5	303.5	822.5
	1.831	484.5	310	830
	1.832	498	305.5	826
	1.833	511	310.5	835.5
	1.834	524.5	314.5	837
	1.835	537.5	317.5	838
	1.836	549.5	317.5	845.5
	1.837	562.5	321	845.5
	1.838	572	323	850.5
	1.839	590.5	323.5	852.5
	1.84	604.5	328	855
	1.841	618	328.5	864
	1.842	637	329.5	870.5
	1.843	652	332	870.5
	1.844	662	334	879.5
	1.845	682.5	338	885.5
	1.846	695.5	340	885.5
	1.847	715.5	342.5	896
	1.848	731.5	342	898
	1.849	743.5	346.5	908.5
	1.85	765	350.5	911
	1.851	779.5	348.5	915.5
	1.852	794	355.5	925.5
	1.853	816	354	925
	1.854	826	358	935
	1.855	848	359	939.5
	1.856	867	363.5	945
	1.857	881	363.5	949.5
	1.858	896.5	368.5	952
	1.859	915.5	374	956
	1.86	932.5	374	963
	1.861	950.5	377.5	971
	1.862	964.5	388	975
	1.863	984	388	978.5
	1.864	1000	396.5	981
	1.865	1014	396.5	985
	1.866	1031	401.5	988.5
	1.867	1040	404.5	993
	1.868	1054.5	411.5	997.5
	1.869	1063.5	419.5	1004
	1.87	1079.5	425.5	1005
	1.871	1089	432.5	1012.5
	1.872	1101	435.5	1018.5
	1.873	1109	444	1019.5
	1.874	1120	447	1023.5
	1.875	1128.5	454	1029
	1.876	1137	460.5	1033.5
	1.877	1149	468	1036.5
	1.878	1150.5	472.5	1042
	1.879	1161.5	479.5	1042.5
	1.88	1165	489.5	1046.5
	1.881	1176	499	1048.5
	1.882	1183	504.5	1052.5
	1.883	1183.5	512	1053.5
	1.884	1194.5	521.5	1059
	1.885	1196.5	527.5	1062
	1.886	1205	537.5	1064.5
	1.887	1208	542.5	1064.5
	1.888	1213.5	551.5	1064.5
	1.889	1222	561	1072
	1.89	1223.5	571.5	1075.5
	1.891	1228.5	577	1073.5
	1.892	1235	589.5	1078
	1.893	1237.5	597.5	1079.5
	1.894	1243.5	607.5	1086.5
	1.895	1249.5	616.5	1087.5
	1.896	1256.5	628	1090.5
	1.897	1263	634.5	1087
	1.898	1267.5	649.5	1094
	1.899	1271.5	657	1097.5
	1.9	1279.5	669.5	1100.5
	1.901	1284.5	683	1101.5
	1.902	1288	691.5	1104.5
	1.903	1298.5	705.5	1106.5
	1.904	1302.5	718	1109
	1.905	1309.5	729	1114
	1.906	1313	741	1114
	1.907	1320.5	758	1119.5
	1.908	1327	766	1120.5
	1.909	1333	778.5	1119
	1.91	1336	791	1122.5
	1.911	1339	802.5	1124
	1.912	1347	814.5	1128.5
	1.913	1347.5	826	1131.5
	1.914	1353.5	837	1136
	1.915	1355.5	850	1139
	1.916	1358	863.5	1139
	1.917	1359.5	867.5	1142.5
	1.918	1361.5	879.5	1145
	1.919	1362.5	891	1146.5
	1.92	1362.5	899	1147
	1.921	1362.5	908.5	1152.5
	1.922	1362.5	915.5	1154
	1.923	1362.5	923	1154
	1.924	1369	933	1158.5
	1.925	1362.5	939.5	1158
	1.926	1362.5	945	1159.5
	1.927	1362.5	958.5	1163
	1.928	1368	964	1163
	1.929	1362.5	973.5	1162.5
	1.93	1362.5	975	1168
	1.931	1360.5	984.5	1169
	1.932	1359.5	990	1175
	1.933	1355	988.5	1174
	1.934	1351.5	995	1176.5
	1.935	1354.5	997.5	1178.5
	1.936	1351	1000.5	1180
	1.937	1346.5	1005	1183
	1.938	1346	1002	1183.5
	1.939	1342	1009.5	1187.5
	1.94	1335.5	1005	1183.5
	1.941	1332.5	1008	1189.5
	1.942	1332.5	1012	1193
	1.943	1326	1011.5	1192
	1.944	1318	1013.5	1191
	1.945	1317	1021	1196.5
	1.946	1317.5	1019.5	1196.5
	1.947	1309	1018.5	1197.5
	1.948	1310.5	1022	1197.5
	1.949	1303	1022	1198.5
	1.95	1303	1026	1201
	1.951	1303	1028	1198.5
	1.952	1303	1031	1203.5
	1.953	1301	1038.5	1201.5
	1.954	1303	1037	1198.5
	1.955	1298.5	1041.5	1206
	1.956	1295.5	1043	1201
	1.957	1297.5	1047.5	1204.5
	1.958	1296.5	1048	1204.5
	1.959	1293.5	1049.5	1208
	1.96	1294.5	1049.5	1203.5
	1.961	1288	1056	1207
	1.962	1288	1057	1205.5
	1.963	1293.5	1060	1206.5
	1.964	1291.5	1060	1212
	1.965	1291.5	1064.5	1212.5
	1.966	1288	1069.5	1210.5
	1.967	1286.5	1070.5	1210.5
	1.968	1288	1073	1212
	1.969	1286	1075.5	1213.5
	1.97	1288	1081.5	1213
	1.971	1288	1078	1213.5
	1.972	1284	1086	1213.5
	1.973	1286	1087.5	1218.5
	1.974	1285.5	1089.5	1221
	1.975	1288	1094	1217.5
	1.976	1286.5	1094	1220
	1.977	1288	1097.5	1217.5
	1.978	1286.5	1100	1219
	1.979	1288	1100.5	1219.5
	1.98	1286	1105.5	1213.5
	1.981	1287.5	1107.5	1218
	1.982	1288	1106.5	1215.5
	1.983	1288	1109	1217.5
	1.984	1287	1109	1218
	1.985	1288	1111.5	1217.5
	1.986	1286.5	1109	1218
	1.987	1288	1114.5	1220
	1.988	1285.5	1115	1216
	1.989	1286	1116	1211.5
	1.99	1286.5	1114	1218
	1.991	1283.5	1114	1217
	1.992	1282	1117.5	1213.5
	1.993	1280.5	1118	1217
[truncated: 6,006 more rows]

## Sheet: I
DataTypeVer2.0	Time	Fz	Fz	Fz
NumberOfData		15000	15000	15000
PreTriggerData		0	0	0
SamplingTime[ms]		1	1	1
DataLabel		AK1:CMJ	AK2:CMJ	AK3:CMJ
DataUnit	sec	N	N	N
	0	605	620.5	607
	0.001	608.5	620.5	604
	0.002	606	620	606
	0.003	607	620.5	605
	0.004	607	616	606.5
	0.005	607	618.5	605
	0.006	610	615	603.5
	0.007	606	615.5	606.5
	0.008	606	616	605
	0.009	608.5	614.5	603
	0.01	605	612.5	601.5
	0.011	610	615.5	603.5
	0.012	607	615.5	605
	0.013	608.5	615	604.5
	0.014	607	616	605.5
	0.015	607	612.5	604.5
	0.016	610	611.5	601.5
	0.017	606.5	611	605.5
	0.018	608.5	612	601.5
	0.019	607.5	609.5	604
	0.02	608.5	612.5	605
	0.021	608	611	604
	0.022	609	606.5	605
	0.023	606	610.5	604.5
	0.024	608.5	608	607
	0.025	612.5	606.5	607
	0.026	610.5	607.5	606.5
	0.027	607.5	607	608.5
	0.028	608.5	603	606
	0.029	607.5	601.5	609.5
	0.03	609.5	606.5	609
	0.031	608	605	606.5
	0.032	607	606.5	608.5
	0.033	608.5	601.5	608.5
	0.034	611	603.5	605.5
	0.035	608.5	603.5	609
	0.036	609.5	601.5	608.5
	0.037	611.5	601.5	607
	0.038	609.5	605	608.5
	0.039	610.5	604	610.5
	0.04	606	600.5	613
	0.041	608	601.5	615
	0.042	609	599	610
	0.043	613.5	601	611.5
	0.044	606.5	601.5	613.5
	0.045	608	601.5	610.5
	0.046	606.5	598.5	613.5
	0.047	612	601.5	610
	0.048	608.5	601	611.5
	0.049	608	601.5	614
	0.05	610.5	601.5	610
	0.051	608.5	601.5	613.5
	0.052	610.5	595.5	615.5
	0.053	610	603	616
	0.054	606	601	611.5
	0.055	609	603	615.5
	0.056	608.5	605	615.5
	0.057	610	604	611
	0.058	608	601.5	611.5
	0.059	607.5	604	614.5
	0.06	608	606	612
	0.061	611	606	612.5
	0.062	607.5	604	614
	0.063	601.5	603	615
	0.064	612	605	615.5
	0.065	609	606.5	612
	0.066	608.5	604	612.5
	0.067	610	607	611
	0.068	609.5	605	613
	0.069	609.5	606	614.5
	0.07	608.5	605	611.5
	0.071	608	608.5	612.5
	0.072	609.5	608	614.5
	0.073	608.5	608.5	610
	0.074	609	611	612
	0.075	610.5	608.5	611.5
	0.076	608	609.5	611.5
	0.077	605	611	616
	0.078	609	610	612.5
	0.079	608.5	610	612.5
	0.08	608.5	613.5	610
	0.081	609	615.5	612.5
	0.082	609.5	612	610.5
	0.083	608.5	614	609
	0.084	608.5	613.5	609
	0.085	607	612	608.5
	0.086	607	615.5	611
	0.087	609	616	614.5
	0.088	607	614.5	611.5
	0.089	608.5	613.5	610.5
	0.09	609.5	614.5	609
	0.091	607	610.5	609.5
	0.092	607	615.5	608
	0.093	607	612.5	611.5
	0.094	606	615.5	610.5
	0.095	609.5	613.5	610
	0.096	610	617	606.5
	0.097	610	611.5	609.5
	0.098	613.5	612.5	607.5
	0.099	606.5	616	608.5
	0.1	609	613.5	609
	0.101	608.5	615.5	609
	0.102	608	614	607
	0.103	608.5	614.5	608.5
	0.104	611	613.5	607
	0.105	610	613.5	609.5
	0.106	611	612.5	609.5
	0.107	608.5	613.5	608
	0.108	611.5	611	610
	0.109	612	612	610
	0.11	608.5	611.5	611.5
	0.111	611.5	611	608.5
	0.112	611.5	612.5	609.5
	0.113	611	614	608.5
	0.114	609	615	609
	0.115	613.5	609.5	611.5
	0.116	611.5	610.5	604
	0.117	613.5	610	611
	0.118	612	608.5	613.5
	0.119	611.5	607.5	609.5
	0.12	611.5	610	610.5
	0.121	614.5	607	610
	0.122	613.5	610.5	611
	0.123	612	609.5	610.5
	0.124	612.5	611	610.5
	0.125	616	608.5	612
	0.126	615.5	608	610
	0.127	615	606	610.5
	0.128	614	608	608.5
	0.129	614.5	606	608.5
	0.13	616	607	611
	0.131	620	606.5	611.5
	0.132	615	608	608.5
	0.133	616	605	612.5
	0.134	615	604.5	611.5
	0.135	617	605	608
	0.136	615	607.5	611.5
	0.137	613	607.5	611
	0.138	618.5	608.5	609.5
	0.139	615.5	604	612.5
	0.14	615	605	609.5
	0.141	618.5	606.5	611.5
	0.142	615	606.5	612.5
	0.143	615.5	609.5	614.5
	0.144	621	605	610
	0.145	614.5	607	614
	0.146	618	607	614
	0.147	612	608.5	608.5
	0.148	615.5	608	612
	0.149	616	607.5	610.5
	0.15	615.5	609.5	613
	0.151	616	607.5	612.5
	0.152	614.5	610	611.5
	0.153	615	609.5	613.5
	0.154	616	606.5	616
	0.155	614	607.5	613
	0.156	615	608.5	608.5
	0.157	615.5	607	611
	0.158	615.5	607	614.5
	0.159	616	609.5	613.5
	0.16	614.5	609	614
	0.161	612.5	610	611
	0.162	612	609.5	609.5
	0.163	614.5	610.5	614.5
	0.164	612	608	610.5
	0.165	611	613.5	612.5
	0.166	610.5	608.5	609.5
	0.167	612	611	613
	0.168	612.5	612	611.5
	0.169	611.5	610.5	614
	0.17	612.5	613.5	611.5
	0.171	611.5	610	611.5
	0.172	611.5	612	609.5
	0.173	611.5	612.5	611.5
	0.174	607.5	610.5	612.5
	0.175	610.5	612	610
	0.176	607.5	613	613.5
	0.177	609.5	615.5	609
	0.178	612	613.5	606
	0.179	612.5	612.5	609.5
	0.18	609.5	612	609.5
	0.181	612	615	609
	0.182	609	618	609.5
	0.183	610	613.5	612.5
	0.184	608.5	615	613
	0.185	610	619	610
	0.186	609.5	615.5	611.5
	0.187	607.5	617	610.5
	0.188	610.5	618	610.5
	0.189	609	613	613
	0.19	610	615	609
	0.191	609	615.5	611.5
	0.192	610	615.5	611
	0.193	609	616	607.5
	0.194	610.5	616	614
	0.195	609.5	617.5	608.5
	0.196	610	616	611.5
	0.197	610	614.5	608.5
	0.198	608.5	617.5	608.5
	0.199	610	617.5	611
	0.2	607	613	611.5
	0.201	606.5	615.5	611.5
	0.202	610	614.5	610.5
	0.203	607.5	614	613
	0.204	608	614.5	610
	0.205	610.5	614.5	615
	0.206	608	616	612
	0.207	607	616	612.5
	0.208	608.5	614.5	611
	0.209	607.5	614	613
	0.21	608.5	615.5	612.5
	0.211	607.5	616	610.5
	0.212	608.5	612.5	613
	0.213	608.5	615.5	612.5
	0.214	609	613.5	611.5
	0.215	608.5	617	612
	0.216	608	614.5	610.5
	0.217	608.5	616.5	611
	0.218	607.5	613.5	613
	0.219	609.5	614	610
	0.22	606	613	613.5
	0.221	605.5	609.5	611.5
	0.222	610.5	615	613.5
	0.223	609.5	616	614
	0.224	608.5	614	612.5
	0.225	607.5	614	610
	0.226	607.5	611.5	614.5
	0.227	608.5	610	610
	0.228	607.5	614	613
	0.229	605.5	612.5	612
	0.23	606	611.5	610.5
	0.231	609	610	611
	0.232	607.5	609	612.5
	0.233	606.5	611	609.5
	0.234	608.5	612	614
	0.235	607.5	610.5	615
	0.236	609	608.5	612
	0.237	607	614	615.5
	0.238	610.5	610	613
	0.239	610.5	609.5	610
	0.24	608.5	608.5	612.5
	0.241	611	610	612.5
	0.242	608.5	606	612.5
	0.243	612	607	609.5
	0.244	612.5	611	614
	0.245	615.5	611.5	611
	0.246	615	611.5	612.5
	0.247	611.5	611	608.5
	0.248	612.5	612	610.5
	0.249	613.5	612.5	612.5
	0.25	613	610.5	613
	0.251	614	610.5	611
	0.252	612.5	612.5	614
	0.253	613.5	611	614
	0.254	613.5	611.5	611.5
	0.255	611.5	612.5	608.5
	0.256	614.5	611.5	610.5
	0.257	613.5	610	612
	0.258	615	613.5	612
	0.259	613	612.5	611.5
	0.26	611.5	611.5	612
	0.261	609.5	608.5	610.5
	0.262	614.5	612	612
	0.263	612.5	615.5	609
	0.264	612.5	614.5	609.5
	0.265	615.5	614.5	609
	0.266	615	611	610.5
	0.267	613	614	610.5
	0.268	613	615	609.5
	0.269	611.5	614.5	611.5
	0.27	613.5	615.5	608.5
	0.271	613.5	613.5	607
	0.272	615.5	614	609
	0.273	613	610.5	610.5
	0.274	612	613	611
	0.275	611	612.5	609
	0.276	609.5	610.5	610
	0.277	613	612.5	608.5
	0.278	612.5	615	610
	0.279	610	611.5	608.5
	0.28	608.5	615.5	607
	0.281	608.5	614.5	609.5
	0.282	609	615	610
	0.283	612	611.5	607.5
	0.284	610	615.5	607.5
	0.285	608.5	616.5	608.5
	0.286	612.5	613.5	607
	0.287	611	615	611
	0.288	611	615.5	611
	0.289	609.5	613	610.5
	0.29	611.5	615.5	609.5
	0.291	608.5	614	608.5
	0.292	609.5	615	609
	0.293	611	615	610.5
	0.294	608	615.5	610
	0.295	610.5	616	610
	0.296	609.5	613	609
	0.297	607	610.5	610
	0.298	606	613	608.5
	0.299	606.5	611.5	611.5
	0.3	605.5	612.5	606.5
	0.301	605.5	610	607.5
	0.302	606	612.5	607
	0.303	609.5	614.5	610
	0.304	608	615.5	609.5
	0.305	610.5	615	607.5
	0.306	607.5	610.5	605
	0.307	606	611	611
	0.308	606.5	611	606.5
	0.309	607	607.5	609.5
	0.31	609.5	612.5	610.5
	0.311	604	614.5	610
	0.312	611	611	608.5
	0.313	608.5	611	611
	0.314	610.5	610	608.5
	0.315	609	609.5	609.5
	0.316	608	611.5	608
	0.317	608	611.5	611
	0.318	606.5	606	609.5
	0.319	606	610	607
	0.32	608	610	612
	0.321	605.5	603	610.5
	0.322	608.5	608.5	608
	0.323	606	609	611.5
	0.324	604	604	607
	0.325	605.5	609.5	610
	0.326	606	607.5	611
	0.327	608.5	608	609
	0.328	607	606.5	609
	0.329	606.5	606.5	613.5
	0.33	606	606	614.5
	0.331	607.5	608	610.5
	0.332	608	604.5	611.5
	0.333	608	604.5	612.5
	0.334	608.5	606	608
	0.335	607.5	605	611
	0.336	607	606.5	608.5
	0.337	606	605.5	611.5
	0.338	611.5	605	613.5
	0.339	608.5	608	608.5
	0.34	607	608.5	611.5
	0.341	611	604	610
	0.342	608.5	607	613.5
	0.343	610	605	608.5
	0.344	607.5	604	614
	0.345	608.5	608	610
	0.346	610	608	611
	0.347	610	607.5	609
	0.348	612.5	606	612.5
	0.349	608.5	603.5	610.5
	0.35	611	601.5	609
	0.351	612.5	606.5	611
	0.352	611	606.5	609
	0.353	609	602.5	609.5
	0.354	612.5	603.5	610
	0.355	608.5	604	613.5
	0.356	611.5	607.5	611.5
	0.357	609	604	611.5
	0.358	609.5	607.5	610
	0.359	608.5	606.5	612
	0.36	608	605	611.5
	0.361	613.5	604.5	613.5
	0.362	608.5	608.5	609
	0.363	608	608	606
	0.364	608.5	608.5	610
	0.365	610.5	606.5	609.5
	0.366	611	607.5	610.5
	0.367	612.5	610.5	613
	0.368	611.5	609.5	610.5
	0.369	608.5	609.5	608.5
	0.37	607	608.5	608.5
	0.371	611	608.5	610
	0.372	610	611	610
	0.373	612.5	608.5	612
	0.374	607.5	611	609
	0.375	615	608	610
	0.376	609.5	608.5	612
	0.377	611.5	612.5	607.5
	0.378	609.5	610	609.5
	0.379	610.5	611.5	608.5
	0.38	607	611.5	608
	0.381	610.5	610	607
	0.382	609	612.5	608
	0.383	610.5	612.5	608.5
	0.384	614.5	611.5	611
	0.385	610.5	614	608
	0.386	610	610.5	605.5
	0.387	612	614.5	608
	0.388	609	612	609.5
	0.389	609.5	613.5	608.5
	0.39	609.5	611	609
	0.391	605.5	613	605
	0.392	609	613.5	608.5
	0.393	612.5	612	607
	0.394	612	611.5	605
	0.395	615	613	603.5
	0.396	612	614	607.5
	0.397	610.5	614	605
	0.398	612	612.5	605
	0.399	611.5	609.5	605.5
	0.4	611	612.5	607
	0.401	608.5	609.5	606
	0.402	614	612.5	606
	0.403	613.5	616	608
	0.404	614.5	611.5	605.5
	0.405	614.5	612.5	605
	0.406	614.5	615	606
	0.407	612.5	611	606
	0.408	615.5	614	606.5
	0.409	615	614	604.5
	0.41	616.5	614.5	606.5
	0.411	615	610.5	606
	0.412	612	611	605
	0.413	616	613.5	606.5
	0.414	618	610	606.5
	0.415	615	611.5	604
	0.416	613.5	611.5	604.5
	0.417	615	611.5	604.5
	0.418	615.5	608.5	605
	0.419	615	611	607.5
	0.42	614.5	608.5	608.5
	0.421	614.5	609	605
	0.422	612	609	606
	0.423	618.5	607.5	605.5
	0.424	615.5	611	608
	0.425	615.5	608.5	606.5
	0.426	613.5	610.5	607
	0.427	615	612	607
	0.428	615.5	609.5	607.5
	0.429	615	608	611
	0.43	616	611.5	605
	0.431	615	609.5	608.5
	0.432	614	607.5	609
	0.433	618.5	605.5	609
	0.434	614.5	607.5	606.5
	0.435	619	607.5	606.5
	0.436	616	604.5	610
	0.437	616.5	606.5	609.5
	0.438	613.5	607.5	609.5
	0.439	615.5	607	609
	0.44	619.5	607	611
	0.441	614	608	610
	0.442	615.5	604	611
	0.443	615.5	606	611.5
	0.444	615	607.5	610
	0.445	615.5	607	609
	0.446	614.5	604.5	613
	0.447	617.5	606	612.5
	0.448	615	604	609.5
	0.449	617	605.5	608.5
	0.45	616	601.5	610
	0.451	619	601.5	608
	0.452	616	601.5	608.5
	0.453	615.5	603.5	612.5
	0.454	616	602.5	608
	0.455	615	605.5	609.5
	0.456	614.5	604	610
	0.457	617.5	603.5	608
	0.458	615.5	606	609
	0.459	618	604	611.5
	0.46	615.5	601	610.5
	0.461	617.5	607	612.5
	0.462	612.5	602.5	608.5
	0.463	614.5	606.5	612.5
	0.464	616	601.5	610
	0.465	615.5	605	609.5
	0.466	616	605	608
	0.467	618	605	609
	0.468	615.5	604	611.5
	0.469	614.5	604	609
	0.47	614.5	603.5	610.5
	0.471	615.5	603	610.5
	0.472	616	604	609.5
	0.473	616	601.5	608
	0.474	613.5	603	610
	0.475	614	606	608.5
	0.476	614	604.5	607.5
	0.477	615	603.5	606
	0.478	614.5	601.5	610.5
	0.479	614.5	607.5	608.5
	0.48	614.5	604	606.5
	0.481	615.5	608	609
	0.482	614.5	606.5	606
	0.483	612.5	606.5	607
	0.484	616	604	607.5
	0.485	610.5	606.5	601.5
	0.486	614.5	605.5	606.5
	0.487	616	604.5	604.5
	0.488	611	606	605.5
	0.489	613.5	604.5	608
	0.49	612.5	605	605
	0.491	615	600.5	605.5
	0.492	613.5	608.5	605
	0.493	612	604.5	605
	0.494	611.5	606	605
	0.495	612.5	606.5	607
	0.496	609	605.5	605.5
	0.497	610	601.5	605
	0.498	612	606.5	605.5
	0.499	611	601.5	606.5
	0.5	614	603.5	607
	0.501	613.5	604.5	605.5
	0.502	609	605	606
	0.503	613	600	607
	0.504	612.5	603.5	604.5
	0.505	613.5	601.5	606.5
	0.506	611.5	606	608.5
	0.507	613.5	601.5	608.5
	0.508	611.5	606	605
	0.509	612.5	601.5	607
	0.51	610.5	601.5	604.5
	0.511	612.5	600	605
	0.512	614	603.5	606
	0.513	610	606	605
	0.514	608	604.5	608.5
	0.515	613.5	601.5	610
	0.516	609.5	603	609.5
	0.517	609	604	609.5
	0.518	610	601.5	608
	0.519	612	601.5	610
	0.52	612.5	602.5	610.5
	0.521	609.5	603	606.5
	0.522	610.5	601.5	607.5
	0.523	608	604.5	609
	0.524	608.5	601.5	608.5
	0.525	612	600.5	607.5
	0.526	609.5	598.5	612
	0.527	608	599.5	611
	0.528	610	601	608
	0.529	608	602.5	608.5
	0.53	611	599.5	609
	0.531	610.5	599	608.5
	0.532	614	598.5	612
	0.533	612	601.5	609
	0.534	608.5	596.5	615.5
	0.535	610.5	599	614
	0.536	611	596.5	610
	0.537	612.5	597.5	611
	0.538	609	603.5	613.5
	0.539	610.5	601.5	613.5
	0.54	608	601.5	613.5
	0.541	614	598.5	616
	0.542	610	600.5	613
	0.543	610	597.5	612
	0.544	612	599.5	613.5
	0.545	612	599.5	612
	0.546	611	599	616
	0.547	613.5	600.5	612.5
	0.548	614	601.5	615.5
	0.549	612.5	600	615.5
	0.55	612	598.5	615.5
	0.551	611	599.5	613
	0.552	611	599.5	615.5
	0.553	612.5	598.5	614
	0.554	615.5	599	616
	0.555	610.5	600	616
	0.556	614.5	599.5	617
	0.557	613.5	601.5	614.5
	0.558	615	601.5	615.5
	0.559	612	601.5	619.5
	0.56	614	600	620
	0.561	611.5	601.5	616.5
	0.562	613.5	601.5	619
	0.563	613.5	597.5	614.5
	0.564	613	601.5	616
	0.565	612	600	620.5
	0.566	616	604	618.5
	0.567	614	601	617.5
	0.568	615	601.5	619
	0.569	613.5	601.5	618
	0.57	612.5	603.5	615.5
	0.571	613.5	601.5	617.5
	0.572	612	602.5	618
	0.573	615.5	603.5	616
	0.574	613	604	619.5
	0.575	615	604	613.5
	0.576	611.5	603.5	617
	0.577	614	604.5	615.5
	0.578	612.5	607.5	613.5
	0.579	614	606	616
	0.58	615	608.5	614
	0.581	615.5	610.5	615
	0.582	615.5	608.5	616
	0.583	612	612	611
	0.584	615	610	615.5
	0.585	616	608.5	617
	0.586	615.5	607	613
	0.587	614.5	609	613.5
	0.588	615.5	607	613.5
	0.589	615	609.5	615.5
	0.59	614	612	613
	0.591	615	611.5	615.5
	0.592	615	608.5	614
	0.593	609.5	612.5	613.5
	0.594	615.5	612.5	615.5
	0.595	616	612	616
	0.596	612.5	613	616
	0.597	611.5	612.5	611.5
	0.598	613.5	612	615
	0.599	612.5	608.5	614.5
	0.6	609.5	613.5	615.5
	0.601	612.5	613.5	612.5
	0.602	615	614	616
	0.603	613.5	615	615
	0.604	615	615.5	612.5
	0.605	610.5	614	614
	0.606	614	610.5	613
	0.607	608.5	615	614.5
	0.608	613	615	608.5
	0.609	608.5	615	614
	0.61	612.5	614	609
	0.611	613	614	614
	0.612	608	615	611.5
	0.613	610.5	615.5	611.5
	0.614	611	615	616
	0.615	610.5	615.5	616
	0.616	610	615.5	612.5
	0.617	611	617	609.5
	0.618	610.5	613	611.5
	0.619	611.5	619.5	612.5
	0.62	608.5	619.5	611.5
	0.621	609.5	617.5	610
	0.622	607.5	614.5	610.5
	0.623	610.5	615.5	613.5
	0.624	610	618.5	609.5
	0.625	609.5	614.5	615
	0.626	609.5	614	612.5
	0.627	605.5	615.5	614
	0.628	607	616	612.5
	0.629	608.5	617	613.5
	0.63	608	615.5	609.5
	0.631	609.5	616	613.5
	0.632	608	616	610.5
	0.633	610.5	615.5	611.5
	0.634	609.5	614.5	611.5
	0.635	611.5	611.5	613.5
	0.636	610.5	611.5	609.5
	0.637	612	614	610.5
	0.638	607.5	613.5	612
	0.639	610.5	614	611
	0.64	603	613.5	614.5
	0.641	610	611.5	612.5
	0.642	609.5	616	612
	0.643	608	611.5	608.5
	0.644	608.5	614	612
	0.645	606.5	611.5	611
	0.646	607.5	613	610.5
	0.647	610	615	612
	0.648	606.5	610	611
	0.649	604	611	610
	0.65	606.5	611.5	610
	0.651	606.5	616	613
	0.652	608	610	610.5
	0.653	608.5	611	612.5
	0.654	606.5	612.5	610
	0.655	603.5	609	610.5
	0.656	605	615.5	614
	0.657	608	614.5	614.5
	0.658	610.5	614	610
	0.659	609.5	612	610
	0.66	607.5	612	610.5
	0.661	608	615	611.5
	0.662	608	614.5	612
	0.663	605.5	614.5	614
	0.664	608	614	609.5
	0.665	605	614.5	610.5
	0.666	607	610	609.5
	0.667	605.5	614.5	611
	0.668	606.5	613	609
	0.669	605	615.5	610
	0.67	606.5	615.5	610
	0.671	609	615	609.5
	0.672	608.5	616	612
	0.673	606	613	612
	0.674	608.5	615.5	611.5
	0.675	606	615.5	611.5
	0.676	604.5	611.5	611
	0.677	609.5	615.5	612.5
	0.678	609	617	611
	0.679	606	615	611.5
	0.68	607	614.5	612
	0.681	605.5	614.5	610
	0.682	607	615.5	609
	0.683	607	615.5	612
	0.684	608.5	615.5	611
	0.685	608	612.5	610.5
	0.686	606	611.5	612.5
	0.687	606	614.5	611.5
	0.688	605	615	609.5
	0.689	608	611.5	610
	0.69	606.5	611.5	610.5
	0.691	605.5	611.5	609
	0.692	607	614.5	610.5
	0.693	607	613.5	611.5
	0.694	606.5	612	612.5
	0.695	605	614	610.5
	0.696	605.5	613	611
	0.697	607	614	611
	0.698	605.5	614.5	612.5
	0.699	607	611	612.5
	0.7	601	612.5	613
	0.701	607.5	609.5	611
	0.702	605	610	613.5
	0.703	607	613.5	613
	0.704	607	610	610
	0.705	609	610.5	615.5
	0.706	608.5	612	611.5
	0.707	604.5	608.5	612.5
	0.708	607	611	613.5
	0.709	605	608.5	610.5
	0.71	608.5	611	615
	0.711	610	608.5	611
	0.712	607	610.5	616
	0.713	606.5	610	614.5
	0.714	608.5	611.5	612.5
	0.715	608.5	611.5	613
	0.716	608.5	610.5	613
	0.717	609.5	607.5	618
	0.718	608.5	607.5	610.5
	0.719	608.5	609	613.5
	0.72	608	609.5	613.5
	0.721	607.5	612.5	615.5
	0.722	609.5	612	614
	0.723	610.5	608.5	614.5
	0.724	608.5	608.5	615.5
	0.725	608	609.5	613.5
	0.726	608	610.5	616
	0.727	608	609.5	615.5
	0.728	608.5	610.5	610.5
	0.729	610.5	611	615.5
	0.73	611.5	609	612
	0.731	608.5	610	613.5
	0.732	612	605.5	613.5
	0.733	612	611.5	613.5
	0.734	608	609	614.5
	0.735	608	607	613
	0.736	612	608.5	613.5
	0.737	608.5	605.5	615.5
	0.738	608	610.5	609.5
	0.739	610	608	614
	0.74	610	607.5	615
	0.741	606.5	608.5	612
	0.742	604.5	610	615.5
	0.743	612.5	605.5	614.5
	0.744	609.5	609	615
	0.745	612	608.5	612
	0.746	609.5	608	610
	0.747	609	607	613.5
	0.748	611.5	609.5	614
	0.749	613	611.5	615.5
	0.75	610	608.5	613.5
	0.751	608.5	608	614.5
	0.752	608	609.5	613
	0.753	610	607	613.5
	0.754	610.5	608	608.5
	0.755	608.5	610	612.5
	0.756	610.5	608.5	611.5
	0.757	612.5	605.5	609
	0.758	610.5	605	610
	0.759	611	607.5	614.5
	0.76	610.5	608	613.5
	0.761	610	604.5	609
	0.762	610.5	608.5	611
	0.763	614.5	608	608.5
	0.764	611	609.5	610.5
	0.765	609.5	608.5	608.5
	0.766	614	607.5	610
	0.767	612.5	610.5	608.5
	0.768	610	611	609.5
	0.769	608	612	612
	0.77	608	608.5	611
	0.771	611	611.5	612.5
	0.772	611.5	612	608.5
	0.773	608.5	613	608.5
	0.774	611	612.5	608
	0.775	607.5	610.5	608.5
	0.776	607	611.5	610
	0.777	607	614.5	609.5
	0.778	607.5	611	609
	0.779	608.5	611	607.5
	0.78	610	612.5	608.5
	0.781	608.5	613.5	610
	0.782	608	612.5	609
	0.783	605.5	613	607.5
	0.784	606	613	609
	0.785	605.5	617.5	608.5
	0.786	608.5	612	610
	0.787	607.5	611.5	606
	0.788	604.5	611	607
	0.789	608	611	606.5
	0.79	608.5	610.5	608
	0.791	606.5	613.5	605.5
	0.792	602.5	612.5	605.5
	0.793	606.5	610.5	603
	0.794	606.5	612	608.5
	0.795	606.5	609	611
	0.796	601.5	614	608.5
	0.797	605	612	608.5
	0.798	604.5	611	607
	0.799	605	615	611
	0.8	601.5	610	607
	0.801	606	610	610.5
	0.802	601.5	610.5	610
	0.803	598.5	612.5	608
	0.804	601.5	611.5	608
	0.805	603	609	609.5
	0.806	601.5	612	607.5
	0.807	598	610.5	609.5
	0.808	601.5	610.5	611.5
	0.809	601.5	610.5	609
	0.81	603	608.5	609
	0.811	601	611.5	610.5
	0.812	604	608.5	610.5
	0.813	605.5	611.5	610
	0.814	601.5	608	609.5
	0.815	598	608	612
	0.816	595	607	615
	0.817	597.5	608	612
	0.818	598.5	607.5	609.5
	0.819	599	609	611.5
	0.82	601.5	610.5	608.5
	0.821	601.5	608	614.5
	0.822	599.5	608.5	614
	0.823	601.5	607.5	610.5
	0.824	598.5	608.5	614.5
	0.825	601.5	608.5	616
	0.826	601.5	606.5	613.5
	0.827	599.5	607.5	613
	0.828	600.5	606	613.5
	0.829	599	609	614
	0.83	600	607	612.5
	0.831	600.5	606	615
	0.832	600	608	614.5
	0.833	601.5	608.5	612
	0.834	604.5	607.5	614
	0.835	601.5	608.5	611.5
	0.836	603	608.5	614
	0.837	604	608	615
	0.838	606	608	615.5
	0.839	604	606	615.5
	0.84	606	606.5	612.5
	0.841	606	607	612.5
	0.842	605.5	608.5	616
	0.843	604	606.5	613.5
	0.844	601.5	608.5	614.5
	0.845	608.5	606	611.5
	0.846	603.5	606	613
	0.847	604	605	611
	0.848	608.5	607	611.5
	0.849	606.5	608	614
	0.85	604	607	614.5
	0.851	608	608.5	618
	0.852	606	605	613.5
	0.853	606	606.5	610.5
	0.854	609.5	604.5	611
	0.855	606.5	607	616
	0.856	609	611	614
	0.857	611	605.5	608.5
	0.858	609	607.5	613.5
	0.859	608.5	605	610
	0.86	604.5	609	612
	0.861	608.5	604.5	611.5
	0.862	608.5	604.5	612
	0.863	609	605	615.5
	0.864	611	608	612.5
	0.865	611	608	611
	0.866	612	610	610
	0.867	613.5	609.5	612
	0.868	616	609.5	606
	0.869	614.5	611.5	611.5
	0.87	613.5	607.5	612.5
	0.871	610.5	610.5	607.5
	0.872	614	609.5	611
	0.873	611.5	612.5	608
	0.874	614.5	612.5	609.5
	0.875	612	612	611
	0.876	614.5	610	610
	0.877	615.5	608.5	608.5
	0.878	613	609	608.5
	0.879	613	610	609.5
	0.88	616	611	608.5
	0.881	617	613.5	608
	0.882	616	611	608.5
	0.883	613.5	612	610.5
	0.884	615.5	615.5	608.5
	0.885	617	609	610.5
	0.886	618	610.5	611
	0.887	615	612	607
	0.888	616.5	611	606.5
	0.889	613.5	608.5	611
	0.89	615.5	612.5	609
	0.891	613	615.5	611
	0.892	618.5	610.5	604
	0.893	615.5	611	608.5
	0.894	617.5	613.5	612
	0.895	618	614	608.5
	0.896	615	610.5	608.5
	0.897	616	615	608.5
	0.898	616	609	608.5
	0.899	617	613.5	608.5
	0.9	615.5	614	608
	0.901	613.5	615	607
	0.902	615	609	607.5
	0.903	615	609.5	607
	0.904	615	613.5	609.5
	0.905	618	614	611.5
	0.906	614.5	615	608
	0.907	615	611	608.5
	0.908	615.5	613.5	608.5
	0.909	617.5	616.5	609
	0.91	616	615.5	610
	0.911	612.5	613.5	612.5
	0.912	614.5	612.5	608.5
	0.913	615	615	608
	0.914	618.5	610.5	610.5
	0.915	614.5	612	608.5
	0.916	616	615	611
	0.917	613.5	610.5	611.5
	0.918	614.5	612.5	610.5
	0.919	615.5	612.5	610.5
	0.92	615.5	612.5	610
	0.921	619	610	611
	0.922	614	607.5	612.5
	0.923	616	612.5	611.5
	0.924	611.5	613.5	610
	0.925	615	609.5	615.5
	0.926	614	611	611.5
	0.927	612	609.5	612.5
	0.928	614.5	612	615.5
	0.929	614	610.5	613.5
	0.93	614.5	611	611
	0.931	614	615.5	612.5
	0.932	616	613	611
	0.933	614.5	611	610.5
	0.934	617	612	611
	0.935	617.5	610.5	611
	0.936	614.5	613	610
	0.937	612	608.5	610.5
	0.938	615	610	610.5
	0.939	614	609.5	608.5
	0.94	614.5	611.5	611
	0.941	613.5	608.5	610
	0.942	613.5	612	608.5
	0.943	615	609	611
	0.944	613.5	611.5	607.5
	0.945	614	608.5	610.5
	0.946	615.5	608	608
	0.947	613.5	610.5	611.5
	0.948	611	608	608
	0.949	608.5	611.5	613.5
	0.95	614	608	606
	0.951	615.5	610.5	610
	0.952	612.5	607.5	608.5
	0.953	612	609	606
	0.954	607	606.5	610
	0.955	611.5	608.5	607
	0.956	614.5	609.5	608.5
	0.957	614	609	601.5
	0.958	609.5	608.5	606
	0.959	609.5	610.5	605.5
	0.96	614	608	605.5
	0.961	610.5	611	604
	0.962	612	608.5	604.5
	0.963	608.5	612.5	605.5
	0.964	609	612.5	604
	0.965	607.5	611	601.5
	0.966	610.5	613.5	605
	0.967	608	609.5	601
	0.968	609	611.5	606
	0.969	606	613.5	607
	0.97	607	613.5	604
	0.971	608.5	611	605
	0.972	609.5	610	602.5
	0.973	606	611.5	601
	0.974	605	612.5	601.5
	0.975	604.5	613	606
	0.976	606.5	614	601.5
	0.977	607	612.5	602.5
	0.978	603.5	613.5	605
	0.979	601.5	610	600.5
	0.98	601.5	611.5	603.5
	0.981	608	610.5	603
	0.982	606	611.5	601.5
	0.983	604	612	603.5
	0.984	603	612	601.5
	0.985	606.5	612	601.5
	0.986	607.5	610	603
	0.987	604	612.5	601.5
	0.988	608	613.5	604.5
	0.989	603.5	611	603.5
	0.99	601.5	612.5	601.5
	0.991	604	612.5	606
	0.992	606.5	611	601.5
	0.993	603	613.5	604
	0.994	606	611.5	606
	0.995	604.5	614	601.5
	0.996	603.5	611.5	605
	0.997	607	612.5	601.5
	0.998	604	612.5	606.5
	0.999	602.5	610.5	604.5
	1	601.5	611.5	604
	1.001	606.5	612	605
	1.002	606.5	613.5	608
	1.003	606.5	609	604
	1.004	604.5	611.5	608.5
	1.005	603.5	613.5	605.5
	1.006	605.5	614.5	607.5
	1.007	604.5	614.5	608
	1.008	603	609.5	608.5
	1.009	603	614.5	607.5
	1.01	604	613.5	607
	1.011	606.5	609.5	608.5
	1.012	607	611	606
	1.013	601.5	614.5	608.5
	1.014	606.5	612.5	606.5
	1.015	604	612.5	608.5
	1.016	604.5	612.5	609.5
	1.017	607	612	610.5
	1.018	606.5	615.5	611
	1.019	606.5	614.5	608.5
	1.02	607	610	609.5
	1.021	606.5	614	612.5
	1.022	607	612	612.5
	1.023	609.5	612.5	612
	1.024	608.5	610.5	612.5
	1.025	605	610.5	610.5
	1.026	608	613	610.5
	1.027	609.5	608.5	611.5
	1.028	607.5	611.5	610.5
	1.029	610	612.5	611.5
	1.03	608	613.5	611
	1.031	611	614	612.5
	1.032	610.5	612.5	615.5
	1.033	613	612.5	612.5
	1.034	610	610	612.5
	1.035	611.5	608.5	610.5
	1.036	609.5	609.5	613
	1.037	610	610.5	610
	1.038	608.5	608.5	611
	1.039	612	612	612
	1.04	612	609.5	612
	1.041	614.5	609	612.5
	1.042	614.5	609.5	611
	1.043	611	608.5	608.5
	1.044	608.5	609.5	610.5
	1.045	610	610.5	609
	1.046	612.5	609	610
	1.047	612	606	607.5
	1.048	609	607	612
	1.049	612.5	610	608.5
	1.05	612	607.5	608
	1.051	609	606	610
	1.052	610.5	604	609
	1.053	612.5	609	608
	1.054	609	610	610.5
	1.055	610	608	607.5
	1.056	609	609.5	608
	1.057	611.5	605.5	606.5
	1.058	611.5	607	604.5
	1.059	608.5	608.5	610
	1.06	612	606.5	605
	1.061	611.5	607	606.5
	1.062	614.5	606	607
	1.063	609.5	604.5	607.5
	1.064	610	605	605
	1.065	613	608.5	602.5
	1.066	614	610	606.5
	1.067	612.5	605.5	601.5
	1.068	611.5	603	601.5
	1.069	612	606	604
	1.07	612	606	601.5
	1.071	614.5	604.5	605.5
	1.072	614	607	601.5
	1.073	614.5	608	606
	1.074	611.5	608	602.5
	1.075	608.5	608	605.5
	1.076	612	610	604
	1.077	612	605	605.5
	1.078	612	608	605
	1.079	613.5	608	603
	1.08	612	607.5	606
	1.081	614.5	605	606.5
	1.082	611.5	609.5	605.5
	1.083	612.5	608	607
	1.084	614	608.5	601.5
	1.085	611	606	605.5
	1.086	613.5	607.5	605
	1.087	614.5	605.5	606.5
	1.088	614	609	601.5
	1.089	613.5	610.5	601.5
	1.09	614	608.5	609
	1.091	613.5	608.5	607
	1.092	612.5	610	605
	1.093	612.5	609.5	605.5
	1.094	612	608.5	601.5
	1.095	614	608.5	604
	1.096	615.5	609	604
	1.097	615.5	609.5	603.5
	1.098	615	614.5	605.5
	1.099	615	607.5	605
	1.1	614.5	609.5	604.5
	1.101	613.5	611.5	606
	1.102	614	608	608
	1.103	613	611	607.5
	1.104	613	614	608.5
	1.105	612.5	612.5	608.5
	1.106	616	610.5	608.5
	1.107	612	613.5	607
	1.108	613	613	607
	1.109	614	614.5	604.5
	1.11	613.5	614	608.5
	1.111	615.5	613	611
	1.112	612.5	616	608
	1.113	614	615	608
	1.114	615.5	619	610
	1.115	612	618	608
	1.116	613	614	607.5
	1.117	612	613	609.5
	1.118	615	615.5	611.5
	1.119	611.5	614.5	612.5
	1.12	609.5	616	615.5
	1.121	613.5	615	611
	1.122	610	612	612
	1.123	611.5	615	613
	1.124	611.5	615.5	613.5
	1.125	612.5	612.5	615.5
	1.126	614	613.5	615
	1.127	610	612	615.5
	1.128	611.5	613	615.5
	1.129	611	615.5	614.5
	1.13	611.5	615	615
	1.131	608.5	608.5	615
	1.132	612	615	615
	1.133	608.5	615.5	612
	1.134	608.5	614.5	614
	1.135	609	610.5	615
	1.136	610	611	614.5
	1.137	612	613.5	614
	1.138	609.5	612.5	619.5
	1.139	612.5	613	618.5
	1.14	609	611.5	617
	1.141	612	613.5	615.5
	1.142	611.5	613.5	618
	1.143	608.5	611	615
	1.144	611	611.5	616
	1.145	612.5	612.5	613
	1.146	608.5	610	615.5
	1.147	610.5	609	615.5
	1.148	610.5	608.5	612.5
	1.149	610.5	606.5	617
	1.15	613	607.5	611
	1.151	610	610	616
	1.152	615	611.5	613
	1.153	610.5	606	614
	1.154	607	607.5	614
	1.155	610.5	608.5	616
	1.156	608	606.5	617
	1.157	607	605.5	613.5
	1.158	610.5	606	612.5
	1.159	609.5	610.5	613
	1.16	610.5	608.5	613
	1.161	608	607.5	613.5
	1.162	608.5	607.5	610.5
	1.163	608.5	607	612
	1.164	612	610.5	610
	1.165	611.5	604	612.5
	1.166	610.5	608	611
	1.167	607	606.5	609.5
	1.168	611.5	607.5	612.5
	1.169	608.5	604	608.5
	1.17	613.5	606.5	613
	1.171	610	608	609
	1.172	610.5	606	610.5
	1.173	610.5	606	612.5
	1.174	611.5	608.5	609
	1.175	609	608	607
	1.176	612	608	609.5
	1.177	611.5	608.5	608.5
	1.178	610.5	607.5	613.5
	1.179	613	608	608.5
	1.18	614.5	607.5	609.5
	1.181	614.5	608.5	609.5
	1.182	613.5	608.5	607
	1.183	608.5	609	605
	1.184	608.5	611.5	608.5
	1.185	611	607.5	610
	1.186	611	610	608.5
	1.187	611	610.5	606
	1.188	614.5	608.5	608.5
	1.189	613	609.5	608.5
	1.19	614	609.5	610
	1.191	608	608.5	612.5
	1.192	615.5	609	609.5
	1.193	610.5	611.5	606.5
	1.194	613	611	608
	1.195	611	613	607
	1.196	608.5	611	605
	1.197	612.5	611.5	607.5
	1.198	608	613	609
	1.199	611.5	612	610.5
	1.2	612	613.5	604
	1.201	611.5	615	608.5
	1.202	610	613	608.5
	1.203	612.5	617.5	607.5
	1.204	610	617	610
	1.205	612.5	615.5	607
	1.206	612	615	606
	1.207	609.5	614.5	608
	1.208	610.5	614.5	608.5
	1.209	614	616	610.5
	1.21	611	613	608.5
	1.211	610	616	612
	1.212	608.5	612.5	612
	1.213	614.5	616	610.5
	1.214	611	616	613
	1.215	608.5	614.5	610.5
	1.216	611	618.5	608
	1.217	612	613.5	611
	1.218	609.5	618	613.5
	1.219	610.5	614.5	610.5
	1.22	609.5	615	615.5
	1.221	610.5	613.5	614.5
	1.222	610.5	615.5	614.5
	1.223	612	613.5	613.5
	1.224	608.5	613	617
	1.225	609.5	614	612
	1.226	612.5	617	615.5
	1.227	606.5	615	617
	1.228	607	615.5	613
	1.229	614	617.5	615.5
	1.23	608.5	612.5	616
	1.231	612.5	615	616.5
	1.232	611.5	612.5	615.5
	1.233	613	614.5	614
	1.234	610.5	612.5	615.5
	1.235	608.5	612.5	614.5
	1.236	609	616	616
	1.237	611.5	612.5	616
	1.238	610	611.5	620
	1.239	612.5	613	615.5
	1.24	611.5	610.5	614
	1.241	608	615	619.5
	1.242	609.5	610	615
	1.243	609.5	613	614
	1.244	608.5	607.5	616
	1.245	611.5	610	615.5
	1.246	610	611	617
	1.247	609.5	608.5	615.5
	1.248	613	612.5	615.5
	1.249	608.5	609.5	615.5
	1.25	608.5	609	612.5
	1.251	611.5	607	617
	1.252	609	609.5	616
	1.253	608.5	608.5	616
	1.254	611	609.5	612.5
	1.255	609.5	606	616
	1.256	612.5	607.5	612
	1.257	610.5	608	616
	1.258	608	609	614.5
	1.259	609.5	608.5	614.5
	1.26	607.5	613	616
	1.261	609.5	608	613
	1.262	609	609	610.5
	1.263	610	607.5	608.5
	1.264	608.5	608.5	612
	1.265	607.5	603	615.5
	1.266	608	609.5	612
	1.267	607.5	608.5	610.5
	1.268	615	608.5	612
	1.269	611	607.5	611
	1.27	608.5	610	609.5
	1.271	605	609.5	608.5
	1.272	608.5	608.5	609.5
	1.273	608.5	607	614
	1.274	610	611	608
	1.275	606.5	608.5	607.5
	1.276	607	608	604.5
	1.277	608.5	609	607.5
	1.278	610	610	607
	1.279	612.5	612	611
	1.28	610.5	608.5	607
	1.281	612.5	609	606
	1.282	609	614.5	604
	1.283	608.5	611	605.5
	1.284	609	614	605.5
	1.285	608.5	612.5	606.5
	1.286	608.5	614	605
	1.287	607	614.5	609
	1.288	610.5	613	607
	1.289	611.5	613.5	605.5
	1.29	613	612.5	608
	1.291	612	610.5	601.5
	1.292	610.5	609.5	601
	1.293	608.5	612.5	603.5
	1.294	609	613.5	605
	1.295	608.5	614	604.5
	1.296	610	616	604
	1.297	611	615.5	605
	1.298	608.5	614	605.5
	1.299	607.5	616	607.5
	1.3	606	613	608.5
	1.301	606	614.5	605
	1.302	608.5	615.5	605
	1.303	609.5	618.5	608.5
	1.304	612.5	615.5	605
	1.305	608.5	618.5	608.5
	1.306	607.5	615.5	604.5
	1.307	607.5	615.5	605.5
	1.308	604	616	606.5
	1.309	606.5	615	608.5
	1.31	606.5	619	608
	1.311	607	613	608
	1.312	608.5	618.5	612.5
	1.313	607	615.5	608
	1.314	608.5	617	607.5
	1.315	605	615.5	613.5
	1.316	606.5	616	613.5
	1.317	606	616	611
	1.318	605	614.5	610
	1.319	607	615.5	613.5
	1.32	611	615.5	608.5
	1.321	610	615.5	612
	1.322	607	612	611
	1.323	608	613.5	610.5
	1.324	604.5	612.5	612.5
	1.325	606.5	616	615.5
	1.326	608.5	615	614
	1.327	609	613	613
	1.328	607.5	615.5	614
	1.329	608.5	608.5	614
	1.33	604	612.5	611
	1.331	608.5	612.5	617.5
	1.332	606	611	619.5
	1.333	605.5	614	615.5
	1.334	607	610	618
	1.335	610.5	609	618.5
	1.336	610	612	617.5
	1.337	602.5	610.5	615.5
	1.338	603	609	619.5
	1.339	605	611.5	616
	1.34	608	607	614
	1.341	606.5	611.5	616
	1.342	609	608	615.5
	1.343	611	607	613.5
	1.344	606.5	608.5	614.5
	1.345	607.5	609.5	615
	1.346	608	609	615.5
	1.347	608.5	608.5	613.5
	1.348	610	608.5	617
	1.349	608	607	615.5
	1.35	608.5	606.5	618
	1.351	608	607	616
	1.352	609	606	615.5
	1.353	608.5	605.5	615.5
	1.354	610	607.5	615.5
	1.355	612.5	607	616
	1.356	611.5	601.5	614.5
	1.357	612.5	607.5	615.5
	1.358	609.5	601.5	616.5
	1.359	609	606	614
	1.36	611.5	606	612.5
	1.361	610.5	607	615.5
	1.362	610.5	601.5	614.5
	1.363	610	606.5	615
	1.364	610	606.5	613.5
	1.365	608.5	607	611.5
	1.366	611.5	606.5	614
	1.367	611.5	604	615
	1.368	615.5	607.5	611
	1.369	611.5	605	610
	1.37	612.5	608.5	609
	1.371	615	608.5	612
	1.372	611.5	607.5	609.5
	1.373	610	607	609.5
	1.374	612	608	613.5
	1.375	610.5	606.5	612.5
	1.376	613	607.5	611.5
	1.377	611.5	611	610
	1.378	611.5	609.5	610.5
	1.379	615.5	610	609.5
	1.38	616	609.5	606
	1.381	613.5	608.5	608.5
	1.382	616	611	608.5
	1.383	611	611	606
	1.384	616	610	608
	1.385	616	609	606
	1.386	615.5	610.5	607
	1.387	614.5	611	605.5
	1.388	615	611	604
	1.389	615.5	608	608
	1.39	617.5	612.5	603
	1.391	618.5	613	605.5
	1.392	621	612	607
	1.393	616	609.5	607.5
	1.394	615.5	612.5	603
	1.395	617	611.5	602.5
	1.396	617.5	614	604.5
	1.397	617	613	604
	1.398	617.5	612.5	603
	1.399	611.5	614	601.5
	1.4	614	613	602.5
	1.401	613	612.5	604
	1.402	614.5	614	603.5
	1.403	617	615.5	603
	1.404	613.5	615.5	601.5
	1.405	615.5	613.5	601.5
	1.406	618.5	611.5	601.5
	1.407	615.5	615.5	600.5
	1.408	614.5	611.5	607.5
	1.409	618.5	614	604.5
	1.41	618	618	601.5
	1.411	615.5	613.5	603
	1.412	615	614.5	603
	1.413	617	615.5	601.5
	1.414	617	613.5	606.5
	1.415	615.5	615.5	606
	1.416	614	615.5	607
	1.417	614.5	617	601.5
	1.418	615	613	607
	1.419	615.5	613.5	606.5
	1.42	612.5	613	606
	1.421	615.5	615	610
	1.422	615.5	614	608.5
	1.423	615.5	611	607
	1.424	615	613.5	609
	1.425	613	616	610.5
	1.426	612.5	615.5	610.5
	1.427	614	612	610
	1.428	615.5	613	607
	1.429	615	614	611.5
	1.43	612.5	612.5	607
	1.431	615	615	610
	1.432	612	614	611.5
	1.433	612	610.5	613.5
	1.434	614	613.5	613
	1.435	610	613	610
	1.436	612.5	609.5	611
	1.437	614.5	614	610
	1.438	613	613.5	614.5
	1.439	611	610.5	615
	1.44	610.5	615.5	613.5
	1.441	611	613.5	613.5
	1.442	613.5	610.5	613
	1.443	608	607	611.5
	1.444	612	613.5	612.5
	1.445	610.5	609.5	615.5
	1.446	612.5	607.5	610
	1.447	608.5	609.5	613.5
	1.448	611.5	606.5	617.5
	1.449	610.5	606.5	613
	1.45	609.5	606	612
	1.451	608	608.5	613
	1.452	604.5	606	615.5
	1.453	606	611	615.5
	1.454	607.5	607.5	613
	1.455	609	605	612
	1.456	606.5	601.5	610
	1.457	612	606	614.5
	1.458	607	606	610.5
	1.459	611	607	612.5
	1.46	610.5	604	612.5
	1.461	611	609	614
	1.462	613	603.5	612.5
	1.463	611.5	607	610.5
	1.464	612	604	612.5
	1.465	608	604	612.5
	1.466	611.5	605.5	609
	1.467	613	603	610.5
	1.468	612.5	601.5	609.5
	1.469	613.5	607	611.5
	1.47	609.5	601.5	606
	1.471	612.5	601.5	610.5
	1.472	609	604	613
	1.473	614.5	604	613
	1.474	613.5	601.5	608.5
	1.475	608.5	604.5	609
	1.476	611.5	601.5	607
	1.477	608.5	603	611.5
	1.478	608.5	600.5	607.5
	1.479	610.5	601.5	608.5
	1.48	614.5	602.5	606.5
	1.481	613	601.5	605.5
	1.482	615	601.5	606
	1.483	615	601.5	606.5
	1.484	613.5	603	607.5
	1.485	612	604.5	608.5
	1.486	615	601.5	607
	1.487	612.5	601.5	606.5
	1.488	614	604.5	604
	1.489	610.5	603	606
	1.49	612	603.5	606.5
	1.491	610.5	600	607
	1.492	613.5	604	604.5
	1.493	611	603.5	603.5
	1.494	613.5	600.5	603
	1.495	611.5	606.5	606.5
	1.496	612	604	603
	1.497	610.5	603	604.5
	1.498	611	601.5	605
	1.499	617	602.5	605
	1.5	613	603	605
	1.501	608.5	604	603.5
	1.502	610.5	605	601.5
	1.503	608.5	606	601.5
	1.504	613.5	604	605
	1.505	611	607	605
	1.506	613	606	606.5
	1.507	614	609.5	606.5
	1.508	613.5	606	606
	1.509	611.5	607.5	605.5
	1.51	614	603.5	602.5
	1.511	611	606	605
	1.512	612.5	608	607.5
	1.513	611	608.5	608.5
	1.514	612.5	608	607.5
	1.515	608.5	607	608
	1.516	612.5	606.5	603.5
	1.517	612	605.5	610.5
	1.518	611	606	610.5
	1.519	613	605.5	611
	1.52	612	607	610
	1.521	612	607.5	610
	1.522	608.5	609.5	612
	1.523	609.5	605	609.5
	1.524	611	609.5	611.5
	1.525	611.5	604.5	613.5
	1.526	612	605.5	614.5
	1.527	610	606.5	613.5
	1.528	612	606	613.5
	1.529	609.5	605.5	617
	1.53	609	604.5	615.5
	1.531	611.5	605	611.5
	1.532	610	607.5	616
	1.533	612	603.5	615.5
	1.534	608.5	606.5	616
	1.535	611.5	605.5	615
	1.536	609	607	615.5
	1.537	612	608.5	619.5
	1.538	611.5	605.5	617
	1.539	611	606.5	616
	1.54	610.5	608.5	615.5
	1.541	612.5	608.5	616
	1.542	611.5	605.5	617.5
	1.543	609	607	622
	1.544	608	604.5	619.5
	1.545	609.5	606.5	619
	1.546	614.5	606	618
	1.547	612	605.5	620.5
	1.548	610	607.5	615.5
	1.549	611.5	604.5	619.5
	1.55	611.5	607	617
	1.551	611.5	601.5	617.5
	1.552	613	603	616
	1.553	610	606	622
	1.554	612	607.5	615.5
	1.555	611	606	616
	1.556	608.5	606	617.5
	1.557	611.5	606	614.5
	1.558	610	605.5	615
	1.559	612	607	618
	1.56	613.5	606	615
	1.561	612	607.5	615
	1.562	611	605	616
	1.563	613	605.5	615.5
	1.564	617.5	604	615
	1.565	614.5	606.5	609.5
	1.566	610.5	605.5	613.5
	1.567	612	603	615.5
	1.568	613.5	604.5	613.5
	1.569	612.5	607	611
	1.57	613.5	603.5	609.5
	1.571	612.5	605.5	611.5
	1.572	611	606.5	613
	1.573	615	606	614
	1.574	615.5	608.5	610
	1.575	613	605.5	613
	1.576	611	606	610.5
	1.577	614.5	606.5	609
	1.578	614	605	607.5
	1.579	611.5	603.5	611.5
	1.58	612.5	606.5	607.5
	1.581	615.5	601.5	607
	1.582	613.5	604	608.5
	1.583	613.5	605	611
	1.584	616	607	607.5
	1.585	618.5	607.5	608.5
	1.586	615	607.5	606.5
	1.587	611.5	606.5	607.5
	1.588	613	604	607.5
	1.589	612	607.5	608
	1.59	617.5	605	607.5
	1.591	613.5	607	607.5
	1.592	613	604.5	607
	1.593	616	607	607.5
	1.594	612.5	610	607
	1.595	612.5	607	608.5
	1.596	615.5	607.5	607.5
	1.597	609.5	607	606
	1.598	610.5	608	608.5
	1.599	612.5	605.5	608.5
	1.6	614	609	609.5
	1.601	615	610	608
	1.602	611.5	608	605.5
	1.603	609.5	606	608
	1.604	610.5	608	607
	1.605	615.5	610.5	607
	1.606	609.5	608.5	607
	1.607	609.5	607.5	608.5
	1.608	612.5	609	606
	1.609	613	608.5	611
	1.61	610.5	615	609
	1.611	611.5	610	608.5
	1.612	611	613	609.5
	1.613	612.5	610.5	613
	1.614	612	607	607
	1.615	609.5	611.5	609.5
	1.616	608.5	613	611.5
	1.617	606	610	610
	1.618	608.5	610.5	612.5
	1.619	609	614.5	610.5
	1.62	607.5	612.5	611
	1.621	606.5	611.5	612.5
	1.622	606	611	611.5
	1.623	608.5	612	614.5
	1.624	607.5	609	613.5
	1.625	606.5	615	610
	1.626	607.5	615.5	614
	1.627	607.5	611	612.5
	1.628	608	612.5	611
	1.629	608	614	613.5
	1.63	607	612.5	609.5
	1.631	604.5	614.5	615
	1.632	609	614	610
	1.633	604.5	615.5	612
	1.634	606	615.5	613
	1.635	607	617.5	613.5
	1.636	604	614.5	614.5
	1.637	608.5	611	613.5
	1.638	605	612.5	609.5
	1.639	608	615.5	612
	1.64	607	614.5	614.5
	1.641	606.5	610.5	615.5
	1.642	604.5	616	612.5
	1.643	604.5	615.5	612.5
	1.644	607.5	615	612.5
	1.645	608	616	613
	1.646	604	615.5	615.5
	1.647	606	613.5	608.5
	1.648	606.5	616	614.5
	1.649	606	615.5	613
	1.65	606.5	616	610.5
	1.651	604	614.5	617
	1.652	605	613.5	614
	1.653	610	616	617
	1.654	603	614.5	614
	1.655	610	618	609
	1.656	610.5	618	614.5
	1.657	606.5	616	615
	1.658	608.5	614.5	612
	1.659	612.5	615.5	614
	1.66	609	618.5	613
	1.661	607.5	621	614
	1.662	609.5	613	610
	1.663	608.5	615	614
	1.664	606	613.5	611.5
	1.665	609	614.5	615.5
	1.666	608	610.5	613
	1.667	608.5	617	613.5
	1.668	608	615.5	613.5
	1.669	610.5	615.5	612.5
	1.67	610	615.5	614.5
	1.671	607.5	616	613.5
	1.672	606.5	617.5	616
	1.673	613.5	609.5	615.5
	1.674	609.5	615	613.5
	1.675	605.5	614	614.5
	1.676	608	614.5	613
	1.677	607.5	612	612
	1.678	608	615.5	615
	1.679	610	612.5	615
	1.68	607.5	612	615
	1.681	604	613.5	613.5
	1.682	608.5	611.5	617.5
	1.683	608	615.5	615.5
	1.684	606	615.5	616
	1.685	607	613	615.5
	1.686	608.5	615	616
	1.687	608	614	620
	1.688	606	612.5	615.5
	1.689	608.5	613.5	615
	1.69	608	611	612
	1.691	606	611	612.5
	1.692	608	612.5	616
	1.693	607	613	614.5
	1.694	606	615.5	612
	1.695	611.5	615.5	615.5
	1.696	607.5	615	615.5
	1.697	611.5	615	617.5
	1.698	605	612.5	616
	1.699	607	616.5	613
	1.7	608	612.5	617.5
	1.701	607	614	612.5
	1.702	608	614	615
	1.703	611	614.5	616
	1.704	608.5	613.5	613.5
	1.705	606.5	614	613.5
	1.706	607	616	615
	1.707	604	613	616
	1.708	605	617.5	612
	1.709	605.5	616	616
	1.71	609	616	615.5
	1.711	607	615.5	614
	1.712	608.5	615.5	613.5
	1.713	607.5	614.5	612.5
	1.714	603	616	614
	1.715	607.5	613.5	616.5
	1.716	610.5	617	615
	1.717	603	615.5	611.5
	1.718	607	614.5	614.5
	1.719	604.5	613	614.5
	1.72	609	617.5	613.5
	1.721	609	618.5	615.5
	1.722	608	615.5	614.5
	1.723	607	615.5	614.5
	1.724	608	616	616
	1.725	607	611.5	610
	1.726	610	616	616
	1.727	607	615	615
	1.728	610.5	615	615.5
	1.729	609.5	617.5	615
	1.73	609.5	618.5	614
	1.731	608.5	614	616
	1.732	608	614.5	617
	1.733	610	620	616
	1.734	611	616	612.5
	1.735	607	616	617.5
	1.736	608.5	616	616
	1.737	610.5	615.5	616
	1.738	612	616	616
	1.739	609	618	616
	1.74	608.5	615.5	615.5
	1.741	610.5	617	615
	1.742	608.5	614.5	616
	1.743	609.5	616	615
	1.744	612	615.5	618
	1.745	614	616	617.5
	1.746	613	616	617
	1.747	613	620.5	617
	1.748	612	622	612
	1.749	611.5	616	617.5
	1.75	610.5	616	617.5
	1.751	612.5	615.5	615
	1.752	615.5	618	617
	1.753	615	617.5	618.5
	1.754	611	620	623
	1.755	617	617.5	616
	1.756	613	615.5	618
	1.757	616	618.5	618.5
	1.758	614	613.5	616.5
	1.759	615	614.5	615.5
	1.76	616	615.5	616
	1.761	615.5	618	619.5
	1.762	614.5	618.5	617.5
	1.763	611.5	616.5	618
	1.764	611	614	616
	1.765	613.5	615	615.5
	1.766	614.5	615.5	617.5
	1.767	615.5	615	618
	1.768	613.5	614.5	615
	1.769	615.5	617.5	619
	1.77	615.5	616	616
	1.771	614	617	616.5
	1.772	614.5	614.5	621.5
	1.773	614	615.5	619
	1.774	612.5	618	617
	1.775	614	613	617
	1.776	610.5	614	619.5
	1.777	613.5	615.5	620
	1.778	613	617	615.5
	1.779	614	615.5	618
	1.78	612	617.5	618
	1.781	614.5	616	620
	1.782	614	614.5	617
	1.783	613	617	615
	1.784	614	617.5	617.5
	1.785	613	618	619
	1.786	612	617	615.5
	1.787	611	616	614
	1.788	610	616	620
	1.789	612	616	621.5
	1.79	608.5	615.5	618.5
	1.791	613	616	617.5
	1.792	612.5	616	618.5
	1.793	614.5	617.5	617.5
	1.794	613.5	622	615.5
	1.795	611	619.5	616
	1.796	611.5	621.5	613
	1.797	610	618.5	616
	1.798	606	619.5	616
	1.799	611.5	622	619.5
	1.8	610	622	614.5
	1.801	612	620.5	615.5
	1.802	609.5	619.5	619.5
	1.803	609	619.5	614
	1.804	611.5	622	614
	1.805	609.5	616	617.5
	1.806	610.5	620	615
	1.807	611	619.5	615.5
	1.808	609	618	614
	1.809	609.5	622	617
	1.81	606.5	618.5	614.5
	1.811	608.5	622	613
	1.812	610.5	620.5	614.5
	1.813	612	620.5	614.5
	1.814	608.5	621.5	616
	1.815	608	621.5	614
	1.816	606.5	617	615
	1.817	606	620.5	615.5
	1.818	607	621	614
	1.819	609	620.5	615.5
	1.82	608.5	618.5	614
	1.821	608.5	620	612.5
	1.822	610.5	618	611
	1.823	609	620	611.5
	1.824	610.5	621	614
	1.825	609.5	621	613
	1.826	615	622	611.5
	1.827	608.5	622	614
	1.828	612	617.5	612.5
	1.829	613.5	620	610.5
	1.83	610.5	617.5	615
	1.831	606	616	610.5
	1.832	609.5	617.5	613
	1.833	612	616	612.5
	1.834	612	618.5	611
	1.835	609	621	615.5
	1.836	612.5	615	613
	1.837	613.5	618	614.5
	1.838	613.5	618	615.5
	1.839	615.5	615.5	616
	1.84	616	617	613.5
	1.841	613.5	612.5	616
	1.842	617.5	614.5	618
	1.843	615.5	617.5	616
	1.844	617.5	613.5	615.5
	1.845	622	615.5	618.5
	1.846	620.5	615.5	619
	1.847	617.5	612	620
	1.848	622	610	620
	1.849	620.5	616	619
	1.85	624	612	621.5
	1.851	625	614.5	618.5
	1.852	622	608.5	622
	1.853	624	613.5	621
	1.854	624	611.5	622.5
	1.855	622	611.5	620
	1.856	625	610	621
	1.857	624	610	624
	1.858	623.5	614.5	627
	1.859	622.5	608.5	622
	1.86	623.5	610.5	624.5
	1.861	622.5	608.5	624.5
	1.862	624	603.5	625
	1.863	625	607	624.5
	1.864	624.5	607.5	627
	1.865	629	603.5	623
	1.866	623.5	604	624.5
	1.867	625	604	624.5
	1.868	625.5	607	625.5
	1.869	622	601.5	626.5
	1.87	622	602	626.5
	1.871	624	601.5	624.5
	1.872	624.5	601	626.5
	1.873	621.5	599	627.5
	1.874	622.5	600.5	625.5
	1.875	624	598	623.5
	1.876	620	597.5	622.5
	1.877	623.5	599	624.5
	1.878	620.5	597	625
	1.879	620	594	624.5
	1.88	618.5	595	623
	1.881	619	597.5	624.5
	1.882	619	599.5	625.5
	1.883	620	595	628.5
	1.884	616	594.5	628
	1.885	615.5	594	622
	1.886	615	594	622.5
	1.887	612.5	589.5	626
	1.888	614	592	625
	1.889	615	592.5	626.5
	1.89	608.5	593.5	625.5
	1.891	615	591	623.5
	1.892	612	588.5	627.5
	1.893	613	590.5	628
	1.894	608.5	589	624.5
	1.895	612.5	588.5	626
	1.896	607	584	623.5
	1.897	605	583.5	626.5
	1.898	607	584.5	624
	1.899	607	583.5	625
	1.9	604.5	581	622.5
	1.901	603	584	623
	1.902	601.5	581	622
	1.903	605.5	581.5	620
	1.904	598	582	621.5
	1.905	601.5	575	619
	1.906	600.5	577.5	618
	1.907	603	574.5	616
	1.908	601.5	571.5	620
	1.909	596.5	577	618
	1.91	597.5	571.5	615.5
	1.911	597.5	569	614
	1.912	597	571.5	613.5
	1.913	595	567.5	614
	1.914	595.5	567.5	616
	1.915	591	570	611
	1.916	589	569	609
	1.917	589.5	562.5	609.5
	1.918	586.5	566	610.5
	1.919	585	564.5	612
	1.92	586.5	556.5	608.5
	1.921	586	560	605.5
	1.922	582	556	604
	1.923	580.5	555.5	604.5
	1.924	578	552.5	601.5
	1.925	574.5	555	601
	1.926	579	549	598.5
	1.927	575	553	600.5
	1.928	576	549	601.5
	1.929	574.5	545.5	597
	1.93	571	541	596
	1.931	573	540	596.5
	1.932	568.5	540	593
	1.933	569.5	539.5	591
	1.934	566.5	537	594
	1.935	565	535	594.5
	1.936	564	534.5	590
	1.937	560.5	533	591.5
	1.938	556.5	530.5	589.5
	1.939	556	526.5	590
	1.94	556.5	524.5	586.5
	1.941	554	521.5	586.5
	1.942	551.5	519.5	584.5
	1.943	550	518.5	586
	1.944	547.5	512	583
	1.945	548.5	512	579.5
	1.946	545	506	586.5
	1.947	541.5	505.5	579
	1.948	541	504	579.5
	1.949	542.5	503	575.5
	1.95	538	497	576
	1.951	539	495	573
	1.952	537.5	492.5	571.5
	1.953	536	486	571.5
	1.954	532.5	485.5	570
	1.955	532.5	478	566
	1.956	532	478.5	565
	1.957	526.5	474.5	565
	1.958	531.5	468	562.5
	1.959	529	466.5	560
	1.96	529	459.5	556.5
	1.961	526.5	457	559
	1.962	526.5	452.5	549
	1.963	522.5	451	551
	1.964	526.5	442	548.5
	1.965	523	437.5	549.5
	1.966	522.5	433	545
	1.967	520	428.5	543.5
	1.968	517.5	423	540.5
	1.969	517.5	420.5	538
	1.97	515	410.5	534
	1.971	515.5	405	530
	1.972	512	403	529.5
	1.973	509.5	398.5	526
	1.974	509	394	524.5
	1.975	513	386	523
	1.976	509	382.5	521.5
	1.977	509	375	517.5
	1.978	505	368.5	516
	1.979	504.5	363	511.5
	1.98	500	360.5	512
	1.981	499	353	507
	1.982	498	348	505
	1.983	493	340	503.5
	1.984	494.5	332.5	504.5
	1.985	491.5	332	501
	1.986	488	323	498
	1.987	484	316	492.5
	1.988	483.5	314	491.5
	1.989	481	307.5	488.5
	1.99	479.5	299.5	486.5
	1.991	475	294	482
	1.992	471	288.5	484.5
	1.993	469.5	283.5	478
[truncated: 13,006 more rows]

## Sheet: J
DataTypeVer2.0	Time	Fz	Fz	Fz
NumberOfData		15000	15000	15000
PreTriggerData		0	0	0
SamplingTime[ms]		1	1	1
DataLabel		U1:CMJ	U2:CMJ	U3:CMJ
DataUnit	sec	N	N	N
	0	721	713.5	714.5
	0.001	723	715	714.5
	0.002	722	713.5	713
	0.003	724.5	711.5	715.5
	0.004	724.5	712.5	717
	0.005	724.5	717.5	711
	0.006	722.5	715.5	717.5
	0.007	722.5	711	712.5
	0.008	723.5	713	714
	0.009	724.5	716.5	714.5
	0.01	723.5	715	715.5
	0.011	721	715.5	711
	0.012	722.5	717.5	709.5
	0.013	721.5	717.5	711
	0.014	719	718.5	712.5
	0.015	722	718.5	715.5
	0.016	721	716	714.5
[truncated: 14,983 more rows]
