# Supplementary material for: Effects of high-intensity sprint exercise on neuromuscular function in sprinters: the countermovement jump as a fatigue assessment tool
Source: PeerJ. 2024 May 29;12:e17443. doi: 10.7717/peerj.17443 (PMC11143976; doi:10.7717/peerj.17443)
Supplement: Supplemental Information 3 — The data for each trial for each participant (A–J). [file peerj-12-17443-s003.xlsx]

## Sheet: A
DataTypeVer2.0	Time	Fz	Fz	Fz
NumberOfData		8000	8000	8000
PreTriggerData		0	0	0
SamplingTime[ms]		1	1	1
DataLabel		I1:CMJ	I2:CMJ	I3:CMJ
DataUnit	sec	N	N	N
	0	532	531	526.5
	0.001	534.5	533	526.5
	0.002	533	531.5	530
	0.003	534.5	531.5	529.5
	0.004	533	529.5	527
	0.005	531.5	528	526.5
	0.006	528.5	531	531
	0.007	537.5	530.5	526.5
	0.008	535	529.5	525.5
	0.009	535	528.5	529
	0.01	533.5	530	524.5
	0.011	533.5	530	524.5
	0.012	533.5	530	526.5
	0.013	533.5	532.5	524.5
	0.014	536	526.5	523
	0.015	532	526.5	527
	0.016	534.5	527.5	526.5
	0.017	533.5	528	526
	0.018	534.5	526.5	527
	0.019	533.5	529.5	528
	0.02	535	526.5	529
	0.021	534.5	530	522.5
	0.022	535.5	526.5	523.5
	0.023	535	529	524.5
	0.024	534	526	526.5
	0.025	533.5	526.5	524
	0.026	533.5	526	524.5
	0.027	531.5	530.5	523.5
	0.028	534.5	528	526.5
	0.029	537	524.5	524.5
	0.03	536.5	531	524
	0.031	535.5	526.5	523
	0.032	535	528	525.5
	0.033	536	528	519.5
	0.034	535	524	522.5
	0.035	534	528.5	526.5
	0.036	536.5	526.5	523.5
	0.037	534.5	523.5	524
	0.038	533.5	526.5	524.5
	0.039	530.5	525	522
	0.04	536	526.5	522
	0.041	539	524	523.5
	0.042	533.5	526	523
	0.043	538.5	525.5	519
	0.044	533.5	527.5	518
	0.045	535	522.5	520.5
	0.046	535	521	523
	0.047	536.5	524.5	521.5
	0.048	533	523	516.5
	0.049	533.5	524.5	522
	0.05	535	525.5	519.5
	0.051	533	524.5	520.5
	0.052	533	524.5	522
	0.053	534.5	524	520
	0.054	535	526.5	519.5
	0.055	536	528	520.5
	0.056	533.5	528	517
	0.057	536	523	522.5
	0.058	533	524.5	520
	0.059	536.5	524.5	517
	0.06	532.5	523	519.5
	0.061	538	526	519.5
	0.062	531	526	518.5
	0.063	533.5	526.5	520
	0.064	535.5	526	515.5
	0.065	531.5	528	520.5
	0.066	535	528.5	521
	0.067	534	526.5	519.5
	0.068	537.5	524.5	520.5
	0.069	532	524.5	521
	0.07	537.5	528.5	520.5
	0.071	539.5	527.5	523.5
	0.072	533	527.5	522.5
	0.073	537	528	522.5
	0.074	535	526.5	523
	0.075	534.5	526.5	520
	0.076	532.5	524.5	523.5
	0.077	531	526.5	523.5
	0.078	533.5	524.5	521
	0.079	531.5	527.5	523.5
	0.08	534	526.5	527
	0.081	534.5	529	524.5
	0.082	535	530	526
	0.083	532	529.5	524.5
	0.084	533.5	532	523.5
	0.085	534	528	521.5
	0.086	532.5	530	523
	0.087	532	528.5	522
	0.088	533.5	531	522.5
	0.089	533	527	527
	0.09	533.5	528	526.5
	0.091	535	528	531.5
	0.092	532	530.5	527.5
	0.093	532.5	531.5	527.5
	0.094	531	528	530.5
	0.095	532.5	528	528.5
	0.096	534	529	528.5
	0.097	535	531.5	527
	0.098	538	533	524.5
	0.099	533	532	528
	0.1	532.5	529.5	527
	0.101	534	533.5	528
	0.102	535.5	534	524.5
	0.103	538	529.5	530.5
	0.104	537	532	528
	0.105	534.5	529.5	532
	0.106	534	532	530
	0.107	532.5	530.5	528.5
	0.108	536	536	530.5
	0.109	537.5	533	533.5
	0.11	534.5	532.5	528.5
	0.111	537	531	526.5
	0.112	535.5	531.5	532
	0.113	538	532.5	530
	0.114	533	529.5	528
	0.115	538.5	531.5	533
	0.116	537	533.5	535.5
	0.117	536.5	531	528
	0.118	537.5	536.5	529
	0.119	535.5	533.5	532
	0.12	536	532	533.5
	0.121	538	533.5	532
	0.122	533.5	532.5	531.5
	0.123	539.5	531	531.5
	0.124	538	530.5	530.5
	0.125	535.5	533.5	530
	0.126	539.5	533.5	530.5
	0.127	539	530.5	529
	0.128	538	531	529
	0.129	538.5	531	530
	0.13	540	532	531
	0.131	538.5	530.5	531
	0.132	536	533	529.5
	0.133	535	534	527
	0.134	534	533	530
	0.135	538	533.5	530.5
	0.136	538.5	531.5	532
	0.137	535.5	533	532
	0.138	533.5	530.5	530.5
	0.139	537.5	533.5	533
	0.14	532	531	531.5
	0.141	535	531	533.5
	0.142	536.5	532	530
	0.143	534	536	531
	0.144	532.5	531.5	530.5
	0.145	537.5	532.5	528.5
	0.146	534.5	530.5	533
	0.147	535	535.5	529
	0.148	534.5	535.5	531
	0.149	534.5	530	530.5
	0.15	533.5	537	529
	0.151	533.5	532	532
	0.152	533	534	526.5
	0.153	535.5	530	529
	0.154	534	533.5	529
	0.155	533.5	537	528.5
	0.156	537	533	528
	0.157	533	534.5	528.5
	0.158	535	534.5	528.5
	0.159	534	534.5	529
	0.16	534	533.5	528.5
	0.161	532	534	527
	0.162	531.5	532.5	526.5
	0.163	534	532.5	524.5
	0.164	529	534.5	525.5
	0.165	533	534.5	529.5
	0.166	532	534	526.5
	0.167	534	536	527.5
	0.168	533	535	526
	0.169	535	533.5	527.5
	0.17	533.5	531	527.5
	0.171	533.5	533.5	529
	0.172	532	537	526.5
	0.173	533	533.5	531.5
	0.174	535	536	526.5
	0.175	533.5	535.5	526
	0.176	532	534	524.5
	0.177	535	534.5	525.5
	0.178	533.5	537	525.5
	0.179	532.5	535.5	526
	0.18	531	533.5	524.5
	0.181	533.5	531	527.5
	0.182	533.5	533.5	528
	0.183	532.5	533.5	528
	0.184	533.5	533.5	526.5
	0.185	534	533	528
	0.186	535.5	533.5	526.5
	0.187	536.5	534	529
	0.188	539.5	532.5	524.5
	0.189	532	532	528
	0.19	536	533	526.5
	0.191	535.5	533	526.5
	0.192	536.5	531.5	529.5
	0.193	533	534.5	533.5
	0.194	536	530.5	526.5
	0.195	535.5	531	529
	0.196	535	531.5	527.5
	0.197	539	532	527
	0.198	534.5	537	526.5
	0.199	535.5	531.5	522.5
	0.2	536	531	526
	0.201	536	531.5	524.5
	0.202	538.5	531.5	532.5
	0.203	539.5	533.5	528
	0.204	534.5	533.5	526.5
	0.205	538	528	529
	0.206	539.5	528	531.5
	0.207	538	528	532
	0.208	537	532	526.5
	0.209	540	533.5	526.5
	0.21	538	533	527.5
	0.211	538	535	529
	0.212	538	528	527
	0.213	536	529	529
	0.214	539.5	536	527.5
	0.215	536.5	529.5	524.5
	0.216	539	531.5	527
	0.217	537.5	530.5	527.5
	0.218	539.5	528	528.5
	0.219	538	527.5	530
	0.22	537.5	532	531
	0.221	536	532.5	529.5
	0.222	536.5	534.5	532.5
	0.223	536.5	533	525.5
	0.224	534	533.5	526.5
	0.225	535	532.5	528
	0.226	532.5	530	529
	0.227	534	531	525.5
	0.228	534.5	528	524.5
	0.229	535	529.5	526.5
	0.23	535	531.5	524.5
	0.231	534	531	529.5
	0.232	533.5	527.5	526.5
	0.233	534	530.5	529.5
	0.234	533.5	528.5	526
	0.235	532.5	526.5	524.5
	0.236	533.5	530	527.5
	0.237	530	526.5	527
	0.238	533.5	531.5	526.5
	0.239	533.5	528.5	529.5
	0.24	530.5	529.5	527.5
	0.241	533	529.5	527.5
	0.242	533.5	530	529.5
	0.243	529.5	531.5	527.5
	0.244	533	528	524.5
	0.245	532	531	529
	0.246	528.5	527.5	526.5
	0.247	531.5	528.5	524.5
	0.248	528	528.5	527.5
	0.249	531.5	528.5	526
	0.25	529	530	528
	0.251	528.5	526	529
	0.252	529.5	529	527
	0.253	526.5	533.5	524.5
	0.254	529.5	530	530
	0.255	526	527	526.5
	0.256	526.5	530.5	524.5
	0.257	529	529	526
	0.258	530	529	528.5
	0.259	532	528.5	524.5
	0.26	528.5	526	524
	0.261	529	530	529
	0.262	530	530.5	525.5
	0.263	526.5	528	525.5
	0.264	528	529.5	526
	0.265	528.5	526.5	524.5
	0.266	528	530	526.5
	0.267	528.5	526.5	526
	0.268	529	528.5	526.5
	0.269	530	527.5	522.5
	0.27	526.5	529.5	521.5
	0.271	529	530.5	524.5
	0.272	527	526.5	528.5
	0.273	528.5	525.5	524.5
	0.274	530.5	528.5	527.5
	0.275	529.5	528	529.5
	0.276	529	529.5	524.5
	0.277	527	528	522.5
	0.278	528	526.5	524.5
	0.279	530	529	528
	0.28	528.5	531	526
	0.281	528.5	530.5	528
	0.282	525.5	530	527
	0.283	530.5	528.5	526.5
	0.284	527.5	529	528
	0.285	526.5	530	524.5
	0.286	528	531	527
	0.287	527.5	527.5	526.5
	0.288	526.5	524	526
	0.289	529.5	524.5	524
	0.29	529.5	533	526.5
	0.291	528.5	527	526
	0.292	528	533	528
	0.293	530	533	526.5
	0.294	528	530	524.5
	0.295	525.5	527.5	528
	0.296	528	528	524.5
	0.297	529.5	526.5	528
	0.298	528	531	526.5
	0.299	532	533.5	527
	0.3	529	531.5	524
	0.301	528.5	527.5	526.5
	0.302	529.5	529.5	527
	0.303	530	530	528
	0.304	531	530.5	525.5
	0.305	530.5	526.5	528.5
	0.306	531.5	528.5	531
	0.307	529.5	531	524.5
	0.308	531.5	530	531
	0.309	530	531	528
	0.31	532.5	534	527.5
	0.311	530.5	534	527.5
	0.312	531.5	530.5	529.5
	0.313	534.5	531.5	529.5
	0.314	527	533	526.5
	0.315	532	530.5	525.5
	0.316	534	531.5	532.5
	0.317	531	529.5	526.5
	0.318	528.5	533.5	527.5
	0.319	534	533	528
	0.32	531	532	527.5
	0.321	535	530	527.5
	0.322	532	529	528
	0.323	533.5	532	528.5
	0.324	532	532.5	530.5
	0.325	535	533.5	533.5
	0.326	531	536	528.5
	0.327	531.5	535.5	526.5
	0.328	533	533.5	529
	0.329	533	533.5	527
	0.33	532.5	535.5	529
	0.331	528	531.5	526
	0.332	532	531	529
	0.333	531.5	532	529.5
	0.334	534.5	530.5	527
	0.335	529	532	524.5
	0.336	531	530.5	529.5
	0.337	531	531	526.5
	0.338	531	533.5	527
	0.339	531	533.5	526.5
	0.34	530	534	526
	0.341	534.5	533.5	527
	0.342	534.5	534	531
	0.343	528.5	533	529.5
	0.344	531	533	529.5
	0.345	534.5	532.5	526.5
	0.346	532.5	533.5	532
	0.347	532.5	532	530.5
	0.348	533.5	533.5	528
	0.349	529.5	536.5	529
	0.35	531.5	532	528
	0.351	532	537.5	528
	0.352	535	533.5	530.5
	0.353	532.5	533.5	526.5
	0.354	535	533	528
	0.355	531	534	530
	0.356	533.5	534	529.5
	0.357	533.5	533.5	531
	0.358	532.5	537.5	530
	0.359	534.5	533.5	527
	0.36	535.5	538	530.5
	0.361	533.5	539	530.5
	0.362	535	531	529
	0.363	531	539	533.5
	0.364	533	537	526
	0.365	531	535.5	527
	0.366	534	538.5	526.5
	0.367	535.5	534	526.5
	0.368	534	536	530
	0.369	532.5	538	528
	0.37	533.5	532	531.5
	0.371	529.5	533.5	529
	0.372	535	538.5	531
	0.373	533.5	537	527.5
	0.374	533.5	536.5	529
	0.375	533	533.5	530
	0.376	535	538	528
	0.377	536	542.5	528
	0.378	536.5	532	532
	0.379	535.5	534.5	528.5
	0.38	536	536.5	526.5
	0.381	538	534.5	526
	0.382	537	536.5	526.5
	0.383	534.5	536.5	526.5
	0.384	538	538	531
	0.385	534.5	533.5	531.5
	0.386	533.5	537.5	529
	0.387	536.5	535.5	531.5
	0.388	539	535.5	528.5
	0.389	537.5	534.5	529
	0.39	539.5	534	528.5
	0.391	539	533.5	528
	0.392	535	539.5	528
	0.393	536.5	535.5	526.5
	0.394	535.5	537	525.5
	0.395	539	536.5	527
	0.396	537.5	533.5	526.5
	0.397	536	533.5	530
	0.398	538.5	534.5	526.5
	0.399	538.5	533	524.5
	0.4	537.5	532.5	529
	0.401	538	535	526.5
	0.402	535.5	532	526.5
	0.403	537.5	536.5	526.5
	0.404	540.5	532	529.5
	0.405	535	532.5	526
	0.406	538.5	531	528
	0.407	540.5	530.5	527.5
	0.408	536.5	530.5	529.5
	0.409	539.5	535.5	523.5
	0.41	538	533.5	526.5
	0.411	534	529.5	526.5
	0.412	534.5	536	529
	0.413	533.5	529	527
	0.414	540.5	533.5	527.5
	0.415	538.5	531	524.5
	0.416	536	526.5	527.5
	0.417	538	531.5	529.5
	0.418	538.5	533	531.5
	0.419	537.5	530.5	524.5
	0.42	537	530.5	530
	0.421	539.5	530.5	527.5
	0.422	535	528	529.5
	0.423	538	529	526.5
	0.424	536.5	527	527
	0.425	538	524.5	527
	0.426	535.5	526.5	528
	0.427	535.5	527	527.5
	0.428	533.5	528	526.5
	0.429	537	528.5	526.5
	0.43	536.5	526	522
	0.431	539	524.5	527.5
	0.432	533.5	530	522.5
	0.433	536.5	526.5	526
	0.434	533.5	527.5	528.5
	0.435	539	528	525.5
	0.436	536.5	524.5	524
	0.437	535	523	524
	0.438	537	525	526.5
	0.439	535.5	527	522
	0.44	533.5	527.5	522.5
	0.441	534	527	522.5
	0.442	536	524.5	526
	0.443	537	526.5	526
	0.444	535	526	526
	0.445	536	526	524.5
	0.446	535	523	521
	0.447	534	523	524.5
	0.448	535	526.5	527.5
	0.449	532	524.5	529.5
	0.45	535.5	524.5	524.5
	0.451	533.5	522.5	522
	0.452	532	526.5	524.5
	0.453	534.5	522.5	524.5
	0.454	535.5	526	524.5
	0.455	533.5	522.5	526.5
	0.456	533	523	527.5
	0.457	532	526	524.5
	0.458	533.5	524.5	528.5
	0.459	535	523.5	522.5
	0.46	535	524.5	523
	0.461	534	522	523.5
	0.462	531.5	521.5	526.5
	0.463	532.5	524.5	524.5
	0.464	531.5	524	524
	0.465	533	523.5	522.5
	0.466	529	524.5	526.5
	0.467	531	524.5	524
	0.468	530.5	524	523
	0.469	530.5	522	522.5
	0.47	533.5	524.5	523.5
	0.471	530	526.5	524.5
	0.472	533.5	526	526
	0.473	531	526	526.5
	0.474	535.5	526.5	524.5
	0.475	530.5	524.5	522
	0.476	533	521	528
	0.477	531.5	523.5	524.5
	0.478	530	526.5	524.5
	0.479	532	527	524.5
	0.48	527	522	521
	0.481	531	525.5	523.5
	0.482	529	523.5	522.5
	0.483	527	525.5	524.5
	0.484	527	522.5	523
	0.485	526.5	519.5	524
	0.486	526.5	526.5	526.5
	0.487	524.5	527.5	523
	0.488	530.5	520.5	526.5
	0.489	529	522.5	523.5
	0.49	526.5	523.5	524.5
	0.491	529.5	524.5	524.5
	0.492	528.5	524.5	524.5
	0.493	531	524.5	526.5
	0.494	528	524.5	526
	0.495	531.5	527.5	524
	0.496	528	526.5	523
	0.497	526.5	526	523
	0.498	530	523.5	526
	0.499	528.5	524.5	527
	0.5	524.5	526	526.5
	0.501	527	526.5	524.5
	0.502	526.5	526.5	526
	0.503	527.5	526.5	523
	0.504	526	524.5	529
	0.505	527	526	526.5
	0.506	527.5	526.5	526.5
	0.507	524.5	526.5	524.5
	0.508	526.5	528	525.5
	0.509	525.5	524.5	529
	0.51	527.5	528	526
	0.511	526.5	530.5	528
	0.512	526.5	529	526.5
	0.513	525.5	531	526.5
	0.514	529.5	526.5	528.5
	0.515	526.5	527.5	532
	0.516	526.5	528	526.5
	0.517	524.5	530	527
	0.518	530.5	530.5	526.5
	0.519	526	529.5	524.5
	0.52	528	526.5	529
	0.521	528	532.5	529.5
	0.522	528	530	527
	0.523	528	531.5	531.5
	0.524	528.5	530	530
	0.525	528.5	528	526
	0.526	530	533.5	528
	0.527	527	528	527.5
	0.528	530	532.5	529
	0.529	529.5	530.5	533.5
	0.53	534	529.5	527
	0.531	531	531	531
	0.532	530	530	530
	0.533	530	531	530.5
	0.534	530.5	533.5	532
	0.535	533.5	534.5	530
	0.536	532	534	529
	0.537	532.5	536	529.5
	0.538	532	535.5	531.5
	0.539	532.5	533.5	528.5
	0.54	536.5	533.5	531.5
	0.541	528.5	533.5	530
	0.542	533.5	530	529
	0.543	534	533.5	530
	0.544	533.5	534.5	530
	0.545	533.5	536	531.5
	0.546	536.5	533.5	527
	0.547	534.5	531.5	529
	0.548	534.5	533.5	529
	0.549	532	534	533
	0.55	539.5	533	530
	0.551	536	534	532
	0.552	533.5	534.5	533.5
	0.553	536.5	535	531.5
	0.554	534.5	536.5	533.5
	0.555	534.5	533.5	531
	0.556	534	536.5	527.5
	0.557	535.5	533.5	527.5
	0.558	535.5	534	531
	0.559	536	536.5	529
	0.56	533.5	539.5	532
	0.561	533.5	535.5	531.5
	0.562	534.5	534	528
	0.563	536	533.5	532
	0.564	539	533.5	531.5
	0.565	536	532	532
	0.566	535	535.5	527.5
	0.567	537	536	531
	0.568	534.5	537	526.5
	0.569	535.5	535.5	527.5
	0.57	538	534.5	533
	0.571	537.5	535	527.5
	0.572	536	534.5	529
	0.573	536	533.5	529.5
	0.574	538.5	536	527
	0.575	535.5	537.5	529
	0.576	536	537.5	527
	0.577	539.5	539	529.5
	0.578	538	534	528
	0.579	536	534.5	526.5
	0.58	533.5	533	529.5
	0.581	539.5	533.5	533.5
	0.582	535.5	533.5	524.5
	0.583	538	539	527
	0.584	536.5	536	531
	0.585	537.5	533	524
	0.586	537.5	533.5	528
	0.587	536	536.5	523.5
	0.588	538.5	537.5	525.5
	0.589	535	538.5	528
	0.59	535.5	537	533
	0.591	533.5	534.5	526
	0.592	531.5	534	527.5
	0.593	536	534	531.5
	0.594	539	538	529
	0.595	534	536	529.5
	0.596	536.5	533.5	524
	0.597	539.5	536.5	523.5
	0.598	538	534	526
	0.599	535	533	525.5
	0.6	537	531.5	526
	0.601	537.5	534.5	526.5
	0.602	534.5	534.5	527
	0.603	536	529.5	530.5
	0.604	538	532	526.5
	0.605	533.5	532	524.5
	0.606	538.5	529	524.5
	0.607	534	533.5	530.5
	0.608	538	533.5	529.5
	0.609	537.5	532	530
	0.61	538.5	532	526
	0.611	535	530	527.5
	0.612	537	526.5	526.5
	0.613	539.5	531	527
	0.614	538	531.5	527.5
	0.615	536.5	532	530.5
	0.616	534	529.5	531
	0.617	539.5	533.5	528
	0.618	534.5	531	524.5
	0.619	535.5	533.5	527.5
	0.62	539.5	531	528
	0.621	536.5	531.5	530
	0.622	538	531.5	527.5
	0.623	540.5	530	527.5
	0.624	539.5	530.5	526.5
	0.625	539.5	529	533.5
	0.626	538	530.5	528
	0.627	538	530	528.5
	0.628	540.5	532	530.5
	0.629	539.5	532	527.5
	0.63	537.5	530	529
	0.631	538.5	526.5	528
	0.632	540.5	527	527
	0.633	538.5	527	529.5
	0.634	540	529.5	526.5
	0.635	542	527.5	529
	0.636	542	527	528.5
	0.637	540	526	526
	0.638	540.5	528.5	529
	0.639	542	528.5	529
	0.64	543	526	524.5
	0.641	538.5	526	532
	0.642	539.5	528	526.5
	0.643	537.5	528	527.5
	0.644	535.5	529.5	526.5
	0.645	537.5	528	529
	0.646	537.5	524	526
	0.647	537.5	526	529.5
	0.648	541.5	528	527
	0.649	540.5	527.5	528.5
	0.65	538.5	527.5	528
	0.651	537	526.5	526.5
	0.652	537	524	529.5
	0.653	538.5	526.5	526.5
	0.654	539.5	529.5	530.5
	0.655	535.5	524.5	528
	0.656	540	527	527
	0.657	534.5	527.5	528.5
	0.658	537.5	528	531.5
	0.659	537.5	525	526.5
	0.66	539.5	524	526.5
	0.661	537	527.5	529
	0.662	538	524.5	531
	0.663	534	523.5	528
	0.664	537.5	527.5	526.5
	0.665	535.5	530	527
	0.666	533	527	527
	0.667	534.5	524.5	529
	0.668	536.5	524.5	525.5
	0.669	532	523	526.5
	0.67	533.5	522.5	525.5
	0.671	533.5	526.5	526.5
	0.672	533	527	526.5
	0.673	533.5	527.5	530.5
	0.674	531.5	524.5	528
	0.675	533.5	524.5	528
	0.676	530.5	524.5	528.5
	0.677	533.5	525.5	526
	0.678	532.5	526.5	528
	0.679	530	524.5	529.5
	0.68	531	526.5	529
	0.681	533	525.5	527.5
	0.682	531	524.5	526.5
	0.683	531	526.5	528.5
	0.684	532	525.5	527
	0.685	530.5	526	526
	0.686	531	526.5	527.5
	0.687	532.5	525.5	528
	0.688	531	526	524
	0.689	528.5	526.5	526
	0.69	529	525.5	524.5
	0.691	528	524.5	527
	0.692	524	525.5	522.5
	0.693	524.5	527.5	528
	0.694	529.5	528	524.5
	0.695	531	527	525.5
	0.696	526.5	522.5	529
	0.697	532	527	526.5
	0.698	528	527	525.5
	0.699	529.5	526.5	526.5
	0.7	522	526.5	521.5
	0.701	525.5	527	524
	0.702	526.5	528.5	524.5
	0.703	524.5	528.5	522.5
	0.704	528.5	526.5	526
	0.705	524.5	526.5	526.5
	0.706	527	527	527.5
	0.707	526	526.5	524.5
	0.708	524.5	531.5	524.5
	0.709	524.5	529.5	524.5
	0.71	524.5	527.5	523
	0.711	522	530	523.5
	0.712	523.5	528	526.5
	0.713	527	528	526.5
	0.714	527	524.5	529
	0.715	525.5	529.5	521.5
	0.716	522.5	529.5	527.5
	0.717	524.5	527	527
	0.718	526.5	530	526
	0.719	523.5	533	526
	0.72	524.5	526	529
	0.721	520.5	527.5	529.5
	0.722	524.5	527.5	528.5
	0.723	525.5	527.5	521
	0.724	524.5	532.5	526.5
	0.725	527	530	528
	0.726	525.5	530.5	527
	0.727	527	529	529.5
	0.728	528	529.5	527.5
	0.729	526.5	527.5	527.5
	0.73	526.5	530	526.5
	0.731	524.5	528.5	531
	0.732	527.5	533.5	528
	0.733	530.5	527	529.5
	0.734	527.5	529	526.5
	0.735	528.5	531	526.5
	0.736	530	525.5	529
	0.737	525.5	533.5	528.5
	0.738	526.5	531	527.5
	0.739	528.5	532.5	527
	0.74	524	530	529
	0.741	526	527.5	527
	0.742	525.5	533.5	527.5
	0.743	530	533	528.5
	0.744	530	533	535
	0.745	527	532.5	530
	0.746	533.5	530.5	529.5
	0.747	530	529	527.5
	0.748	526	531.5	529.5
	0.749	527.5	529.5	533.5
	0.75	526.5	532	528
	0.751	526	529.5	529
	0.752	531.5	529	527.5
	0.753	531	532	527.5
	0.754	528	532	529.5
	0.755	528.5	531	530
	0.756	530.5	533.5	524.5
	0.757	529.5	532	533.5
	0.758	530.5	533.5	527.5
	0.759	531.5	533.5	532
	0.76	532.5	533.5	526.5
	0.761	532	532	527
	0.762	532	536	524.5
	0.763	530.5	531.5	527
	0.764	532	531	528.5
	0.765	532.5	532	526.5
	0.766	533.5	533.5	530
	0.767	532	531.5	524.5
	0.768	537.5	535	526.5
	0.769	528.5	533	526.5
	0.77	534	529.5	530
	0.771	535	530	529.5
	0.772	533.5	530	524.5
	0.773	534.5	528.5	528.5
	0.774	536.5	535	528
	0.775	533.5	534	528.5
	0.776	532.5	531.5	524.5
	0.777	535.5	534	529
	0.778	534	535.5	531
	0.779	533.5	533.5	524
	0.78	533	530	524.5
	0.781	534.5	532	522.5
	0.782	537	531	527.5
	0.783	534.5	536	528.5
	0.784	535.5	533.5	525.5
	0.785	538.5	528	524.5
	0.786	534.5	531.5	524.5
	0.787	532.5	534	524
	0.788	539.5	534.5	526.5
	0.789	534	530.5	523.5
	0.79	536.5	535.5	526.5
	0.791	536.5	533.5	521.5
	0.792	536.5	532.5	523
	0.793	539.5	533.5	521.5
	0.794	535.5	534	524
	0.795	536.5	535.5	524
	0.796	537	533.5	523.5
	0.797	533.5	533	521
	0.798	536.5	535.5	526
	0.799	535.5	533	524.5
	0.8	537.5	532.5	524.5
	0.801	540	530.5	523
	0.802	539.5	532	523.5
	0.803	538.5	535	526.5
	0.804	539	531.5	527.5
	0.805	536.5	531	522.5
	0.806	536.5	533	523
	0.807	535	530	524
	0.808	535	533	524
	0.809	539	530.5	520
	0.81	533	532	522
	0.811	536.5	532	522.5
	0.812	539.5	532	519.5
	0.813	535.5	533.5	520
	0.814	541	531.5	524.5
	0.815	536	529	524.5
	0.816	535	531	519.5
	0.817	533.5	529.5	520.5
	0.818	540	529.5	522
	0.819	537	528.5	522.5
	0.82	536	529.5	523
	0.821	536.5	531	522
	0.822	539.5	528	515.5
	0.823	537.5	526.5	521.5
	0.824	534	529	523.5
	0.825	538	529	524.5
	0.826	537	530.5	521.5
	0.827	540	528	522
	0.828	537	529	522
	0.829	536.5	525.5	524.5
	0.83	539.5	527	519
	0.831	535.5	526.5	519.5
	0.832	536	526.5	518
	0.833	536	528.5	522.5
	0.834	535	527	517.5
	0.835	535	523.5	516.5
	0.836	535.5	529	519.5
	0.837	533.5	526.5	519.5
	0.838	540	529.5	520
	0.839	535.5	526	520.5
	0.84	533.5	527	515.5
	0.841	536.5	526	513.5
	0.842	536	526	519.5
	0.843	535	527	516
	0.844	535	526.5	515.5
	0.845	532.5	526	519.5
	0.846	535.5	526.5	517
	0.847	535.5	522.5	518.5
	0.848	534	525.5	516.5
	0.849	537	526	518
	0.85	534.5	524.5	517
	0.851	536.5	528.5	513.5
	0.852	534	523	513
	0.853	534	526	516
	0.854	533.5	527	519.5
	0.855	535.5	521.5	521.5
	0.856	535.5	523.5	518
	0.857	532	524.5	518
	0.858	534	526.5	516.5
	0.859	533.5	528.5	519
	0.86	536.5	525.5	515.5
	0.861	533.5	526.5	515
	0.862	535.5	524.5	517.5
	0.863	538	522.5	518
	0.864	533.5	524	517.5
	0.865	533.5	521	514.5
	0.866	533.5	524	517.5
	0.867	533	524.5	519.5
	0.868	533	522	519.5
	0.869	536	521	516.5
	0.87	534	522.5	519.5
	0.871	533	524.5	518.5
	0.872	536	525.5	519.5
	0.873	538	528	518.5
	0.874	538.5	525.5	518
	0.875	531.5	526.5	519
	0.876	533.5	524	519
	0.877	534.5	524.5	519.5
	0.878	535.5	528	521
	0.879	536.5	531.5	519.5
	0.88	533.5	526.5	522
	0.881	533.5	524.5	521
	0.882	532	526	519.5
	0.883	533.5	528	520.5
	0.884	534.5	524	523.5
	0.885	532	524.5	521.5
	0.886	535	527	523
	0.887	535	527.5	521
	0.888	537.5	524.5	522.5
	0.889	536.5	526.5	520.5
	0.89	533.5	526.5	524.5
	0.891	531	526	522.5
	0.892	534.5	526	522.5
	0.893	532	528	526.5
	0.894	536	526.5	526.5
	0.895	534	526.5	524.5
	0.896	533	533.5	527.5
	0.897	530.5	532.5	522.5
	0.898	531.5	530	526.5
	0.899	536.5	530	527.5
	0.9	532.5	527	529.5
	0.901	531.5	528	524.5
	0.902	533.5	526.5	529
	0.903	532.5	528.5	529
	0.904	533	531.5	527
	0.905	533.5	526.5	527
	0.906	530	527.5	530
	0.907	529.5	529	533
	0.908	536	531.5	528
	0.909	532	532	529.5
	0.91	531	530.5	531.5
	0.911	534.5	527.5	532
	0.912	532	529	533.5
	0.913	533.5	528	532
	0.914	532	532	533.5
	0.915	530.5	534	531.5
	0.916	531.5	531.5	536
	0.917	527	532	533.5
	0.918	529	533	533
	0.919	528	533.5	537
	0.92	530.5	528.5	535
	0.921	534	533.5	537.5
	0.922	533	533.5	536.5
	0.923	534	529	536.5
	0.924	530	530.5	538
	0.925	531	534	534.5
	0.926	533.5	533.5	537
	0.927	531.5	535	535
	0.928	531	533.5	536.5
	0.929	532.5	533	533.5
	0.93	530	535	539
	0.931	529	534.5	535.5
	0.932	530	536	539.5
	0.933	532	534	540.5
	0.934	533	532	536
	0.935	531	532	538.5
	0.936	529	532.5	535
	0.937	532	532	538
	0.938	536.5	533.5	539.5
	0.939	532	533.5	539.5
	0.94	528.5	533	539.5
	0.941	534.5	531.5	541
	0.942	533.5	534	541.5
	0.943	530	533.5	536.5
	0.944	533.5	533.5	536
	0.945	532	537	539.5
	0.946	531.5	531.5	536
	0.947	533.5	533.5	536.5
	0.948	534	534	537.5
	0.949	534.5	533.5	539.5
	0.95	531.5	534.5	537
	0.951	531	533.5	537
	0.952	532.5	533.5	537.5
	0.953	533	535.5	539.5
	0.954	529.5	536	536
	0.955	533.5	533.5	536.5
	0.956	533.5	538	533.5
	0.957	535.5	534.5	539
	0.958	532.5	537.5	534.5
	0.959	537	539.5	535
	0.96	536.5	534.5	536
	0.961	532	535.5	537
	0.962	537.5	534.5	537
	0.963	533.5	534.5	532
	0.964	531	534	533.5
	0.965	535.5	536	531
	0.966	533	535	533
	0.967	536.5	533.5	536.5
	0.968	533.5	533.5	535
	0.969	538	537	534
	0.97	533	533	530
	0.971	533.5	532	532.5
	0.972	534.5	533.5	534
	0.973	536.5	535.5	531.5
	0.974	533.5	535.5	532
	0.975	535	536.5	529.5
	0.976	535.5	536	531
	0.977	534.5	533.5	532
	0.978	536.5	536.5	533.5
	0.979	535.5	536	532
	0.98	535	535.5	530.5
	0.981	537	534	528
	0.982	539.5	534	526.5
	0.983	534	533.5	528.5
	0.984	534	532	531.5
	0.985	537	533	530.5
	0.986	540	536	530.5
	0.987	538	534	526.5
	0.988	535	534.5	529.5
	0.989	533.5	533.5	532
	0.99	534.5	534.5	529.5
	0.991	536.5	533.5	528
	0.992	538.5	534	530
	0.993	536	538	529.5
	0.994	536	536.5	532
	0.995	535.5	532	529
	0.996	535.5	535	526.5
	0.997	533	533.5	529
	0.998	538.5	536	529.5
	0.999	535	532	524
	1	538.5	533	529.5
	1.001	536.5	537.5	529
	1.002	534	533	528
	1.003	536.5	533.5	526.5
	1.004	539	534	525.5
	1.005	533.5	534	528
	1.006	534.5	531.5	529
	1.007	535	534.5	526
	1.008	536.5	530.5	526.5
	1.009	539.5	532	526.5
	1.01	535.5	533.5	524.5
	1.011	533.5	535.5	526.5
	1.012	539.5	535	526.5
	1.013	536	532	524.5
	1.014	537.5	531.5	526.5
	1.015	536.5	532	522.5
	1.016	536.5	532.5	524.5
	1.017	536	533	524.5
	1.018	533.5	535	529
	1.019	538	536.5	524.5
	1.02	538	531.5	525.5
	1.021	535.5	529.5	524.5
	1.022	533.5	532	527.5
	1.023	538.5	533.5	519.5
	1.024	536.5	533.5	528
	1.025	533.5	531.5	528.5
	1.026	536.5	531	526
	1.027	538.5	532	526
	1.028	535	528	524.5
	1.029	535	532	524.5
	1.03	533.5	534.5	523.5
	1.031	538.5	533	526.5
	1.032	537.5	530.5	524.5
	1.033	535	531	528
	1.034	536	530	528
	1.035	535.5	530	526.5
	1.036	536.5	527	526.5
	1.037	538	529.5	526
	1.038	534.5	532	521.5
	1.039	535.5	526.5	523
	1.04	536.5	528.5	524.5
	1.041	533.5	530	527
	1.042	533	528.5	521.5
	1.043	536.5	528.5	523
	1.044	538.5	526.5	526.5
	1.045	535.5	527	526.5
	1.046	539	528	521
	1.047	534	531	526.5
	1.048	536	528	524.5
	1.049	533.5	529	524
	1.05	534.5	529	522.5
	1.051	535	524.5	524
	1.052	536.5	526.5	521.5
	1.053	535	525.5	522.5
	1.054	533.5	526.5	523
	1.055	534.5	525.5	524.5
	1.056	532.5	529.5	526
	1.057	533.5	524	522
	1.058	534.5	529	522
	1.059	533.5	527.5	528
	1.06	533.5	525.5	524.5
	1.061	533.5	526.5	523
	1.062	532	531	524.5
	1.063	533.5	522.5	522
	1.064	534.5	528.5	522.5
	1.065	533.5	524	524.5
	1.066	533.5	524.5	524.5
	1.067	533.5	529	522.5
	1.068	533.5	526.5	522.5
	1.069	533.5	526.5	526
	1.07	534	527	524
	1.071	534	526.5	521.5
	1.072	532	528	526.5
	1.073	532	523.5	526.5
	1.074	533	526.5	526
	1.075	535	526	524.5
	1.076	532	524.5	526.5
	1.077	533.5	529	523
	1.078	535	524.5	523
	1.079	534	527	521
	1.08	532.5	524.5	527.5
	1.081	534	528	526.5
	1.082	536.5	528.5	526
	1.083	533.5	526.5	524.5
	1.084	532	532	524.5
	1.085	534	530	527.5
	1.086	531.5	529.5	528.5
	1.087	530.5	528	524.5
	1.088	532	531.5	521.5
	1.089	534.5	528	526.5
	1.09	531	533.5	524.5
	1.091	533.5	532	526
	1.092	533	530	527.5
	1.093	533.5	533.5	525.5
	1.094	533	528	524.5
	1.095	533	528	528
	1.096	530.5	532.5	527.5
	1.097	531.5	530.5	526.5
	1.098	532.5	526.5	528
	1.099	531.5	528.5	524.5
	1.1	528	529.5	524.5
	1.101	528.5	532	527
	1.102	531.5	530	526.5
	1.103	530	531	526.5
	1.104	529	532.5	531.5
	1.105	530.5	527.5	528
	1.106	530	530	529.5
	1.107	529	531.5	528.5
	1.108	529.5	533	529.5
	1.109	529.5	533.5	526
	1.11	529.5	529	528
	1.111	533.5	533.5	526.5
	1.112	530	531.5	527.5
	1.113	534	533	528.5
	1.114	529	532	526.5
	1.115	526.5	532	529
	1.116	530.5	532	526
	1.117	528	534.5	526.5
	1.118	526.5	532.5	530
	1.119	529	528	526
	1.12	529	531	530
	1.121	531.5	531.5	526.5
	1.122	526.5	528.5	528
	1.123	529.5	532	528.5
	1.124	530.5	530	526
	1.125	534.5	529.5	526.5
	1.126	531.5	532.5	526.5
	1.127	529.5	533	526.5
	1.128	532.5	531	533
	1.129	529	533	529
	1.13	529	530	526
	1.131	529	533	528
	1.132	532	531	526.5
	1.133	529	531	523.5
	1.134	527.5	528.5	527.5
	1.135	530	528.5	528
	1.136	529	530.5	532
	1.137	530.5	531	532.5
	1.138	529	533.5	527
	1.139	532	529	532
	1.14	526.5	531	524.5
	1.141	528	529	531
	1.142	526.5	529.5	529
	1.143	527	529.5	530.5
	1.144	527.5	532	528.5
	1.145	529	526.5	530.5
	1.146	528	530	527
	1.147	527.5	531.5	530.5
	1.148	528.5	528.5	532
	1.149	529	530	527.5
	1.15	528.5	532.5	531.5
	1.151	531	532	529
	1.152	528	531.5	528
	1.153	528.5	529.5	529
	1.154	533	531	532
	1.155	531	528.5	527.5
	1.156	531.5	529.5	531.5
	1.157	532	534.5	528
	1.158	527	535	531.5
	1.159	529	530	530
	1.16	531	535	530
	1.161	531.5	530.5	530
	1.162	534	533.5	532.5
	1.163	528	534	532.5
	1.164	529	529	530
	1.165	532	530.5	531
	1.166	532.5	531	530
	1.167	531	531.5	528.5
	1.168	532.5	528.5	528.5
	1.169	531	530.5	531.5
	1.17	528	533.5	531.5
	1.171	534	531.5	531
	1.172	529	531	528
	1.173	529	534	529.5
	1.174	531	533.5	527.5
	1.175	533.5	533.5	530
	1.176	533.5	532	533.5
	1.177	532	532.5	534
	1.178	532.5	529.5	529
	1.179	531	534.5	531
	1.18	533	535	531
	1.181	536.5	531	534
	1.182	536	532	530.5
	1.183	533.5	533.5	528.5
	1.184	534	534	530
	1.185	536	534.5	533.5
	1.186	533	531.5	531.5
	1.187	535	533.5	530.5
	1.188	533	533.5	530
	1.189	534	529.5	533.5
	1.19	535.5	532	527.5
	1.191	536	535	528
	1.192	537	530.5	528.5
	1.193	533.5	533.5	531.5
	1.194	535	533	531.5
	1.195	536	534	532.5
	1.196	539	533	531.5
	1.197	536.5	531.5	531.5
	1.198	535	532.5	530
	1.199	538	533.5	531
	1.2	539	534	532
	1.201	536	535	527
	1.202	537	533.5	531.5
	1.203	534.5	531	528.5
	1.204	536	533.5	528
	1.205	539.5	532.5	529
	1.206	537	532	526.5
	1.207	537	533.5	523.5
	1.208	536.5	535.5	528
	1.209	537.5	533.5	528
	1.21	537	536	528
	1.211	540.5	533	529.5
	1.212	538.5	535	531.5
	1.213	537.5	535.5	527.5
	1.214	540.5	531.5	528
	1.215	539	530.5	525.5
	1.216	536.5	537	528
	1.217	533.5	535.5	525.5
	1.218	539.5	535	527.5
	1.219	535	532	524.5
	1.22	534	534.5	529.5
	1.221	538	533.5	524.5
	1.222	534.5	532	528
	1.223	536	532	524.5
	1.224	532.5	527.5	526.5
	1.225	539	529	527.5
	1.226	534.5	533.5	524.5
	1.227	537.5	535	524.5
	1.228	535.5	530	522.5
	1.229	536	528.5	523.5
	1.23	539.5	531.5	527
	1.231	533	530	524.5
	1.232	537	529.5	525
	1.233	535	533	524.5
	1.234	537	528	524
	1.235	539	531	524.5
	1.236	533	529	524.5
	1.237	537.5	531	524
	1.238	534	532	524.5
	1.239	536	528.5	524
	1.24	535.5	530	524.5
	1.241	537	531.5	524.5
	1.242	535	531	523.5
	1.243	536	524.5	524.5
	1.244	536	529.5	524.5
	1.245	534.5	529	526
	1.246	535	531.5	523.5
	1.247	534	528	520
	1.248	536	530.5	522
	1.249	534	527.5	523
	1.25	535.5	530	527
	1.251	539.5	524.5	522.5
	1.252	535.5	530.5	524.5
	1.253	533.5	530	526
	1.254	533.5	526.5	524.5
	1.255	533.5	532.5	524.5
	1.256	533.5	529	524.5
	1.257	534.5	527	522
	1.258	529.5	525.5	526.5
	1.259	536	526.5	526
	1.26	534.5	525.5	522.5
	1.261	536	526.5	524.5
	1.262	533.5	523	524.5
	1.263	533.5	523.5	526.5
	1.264	533	527	523.5
	1.265	535.5	526	523.5
	1.266	533.5	528	521.5
	1.267	536.5	524.5	522
	1.268	533	528	523
	1.269	530.5	526.5	523
	1.27	535	524.5	523
	1.271	533	526.5	524.5
	1.272	533	526.5	524.5
	1.273	532	527.5	524
	1.274	535.5	526.5	520
	1.275	532.5	524.5	521.5
	1.276	534.5	523.5	522.5
	1.277	533.5	526.5	521
	1.278	533.5	527	521
	1.279	533.5	527	522.5
	1.28	530.5	525.5	523
	1.281	530.5	530.5	523
	1.282	533	527.5	522.5
	1.283	533.5	529.5	526
	1.284	534.5	528	523
	1.285	530	522.5	526
	1.286	533.5	523.5	520.5
	1.287	531	524	525
	1.288	528	526.5	521
	1.289	531.5	524.5	526.5
	1.29	534.5	526.5	520.5
	1.291	534.5	526	522
	1.292	529.5	526.5	524.5
	1.293	534.5	530.5	524.5
	1.294	533.5	526.5	524.5
	1.295	532	523.5	524.5
	1.296	536.5	528	522
	1.297	533	524	523.5
	1.298	532	524.5	521.5
	1.299	533.5	527	521.5
	1.3	537	527	524.5
	1.301	533.5	528.5	523
	1.302	533.5	523.5	523
	1.303	532.5	528	523
	1.304	534	526.5	526
	1.305	530.5	527.5	520.5
	1.306	530	527	526.5
	1.307	531.5	526	524.5
	1.308	530.5	526	524.5
	1.309	536.5	528	519
	1.31	535	527	526
	1.311	533.5	524	524
	1.312	533	530.5	520.5
	1.313	529.5	531	524.5
	1.314	533.5	527	524.5
	1.315	533	527.5	523.5
	1.316	534	529.5	526
	1.317	530	526.5	526
	1.318	529.5	529	527.5
	1.319	533.5	530.5	526.5
	1.32	531	527	525
	1.321	535	529	522.5
	1.322	529.5	526.5	527
	1.323	532.5	528	524.5
	1.324	530	526.5	524.5
	1.325	531	527.5	526
	1.326	531	526.5	527
	1.327	533.5	529.5	524.5
	1.328	529	527	526
	1.329	533.5	528	530
	1.33	534	528.5	526.5
	1.331	527.5	529.5	528.5
	1.332	531.5	528	529
	1.333	533	530	528.5
	1.334	533	531.5	527.5
	1.335	529.5	533	526.5
	1.336	529.5	528	526
	1.337	530	530.5	528.5
	1.338	531.5	529	527.5
	1.339	530	529	532
	1.34	528	524.5	528.5
	1.341	527.5	530.5	528.5
	1.342	530	526.5	526.5
	1.343	529.5	533.5	531
	1.344	529.5	533.5	530.5
	1.345	526.5	527.5	533
	1.346	530	529	529
	1.347	527.5	531	527
	1.348	533.5	529	531.5
	1.349	527.5	529.5	529.5
	1.35	529.5	530	527.5
	1.351	533.5	533.5	531.5
	1.352	529	530	529.5
	1.353	529.5	530.5	531.5
	1.354	529	532.5	532
	1.355	531	527	531.5
	1.356	531	532.5	532
	1.357	531.5	533.5	532.5
	1.358	531	532.5	533.5
	1.359	529	532.5	530.5
	1.36	530.5	534	532
	1.361	529.5	529.5	532
	1.362	529	534.5	526.5
	1.363	528	532.5	532.5
	1.364	532	533	528.5
	1.365	531.5	533	534.5
	1.366	527.5	533.5	533.5
	1.367	529	533.5	530
	1.368	534	533	532
	1.369	531	533.5	528.5
	1.37	531	533	529
	1.371	532	534.5	530.5
	1.372	531	535	531
	1.373	528	536	531
	1.374	533.5	534	533.5
	1.375	531	534	533.5
	1.376	533	537.5	531.5
	1.377	533.5	533.5	531.5
	1.378	531	530	528
	1.379	535	533	530
	1.38	533.5	535	530.5
	1.381	529.5	532	533.5
	1.382	528.5	535.5	529
	1.383	532	535	532
	1.384	530.5	534.5	532
	1.385	533.5	530.5	534.5
	1.386	532	533.5	531
	1.387	531.5	535.5	531
	1.388	531.5	535	531
	1.389	530	537	530.5
	1.39	533.5	533	527.5
	1.391	532	536.5	530
	1.392	534.5	533	529.5
	1.393	535	535	529.5
	1.394	532	539.5	529
	1.395	533	533	528
	1.396	533.5	535.5	530
	1.397	534	537	530.5
	1.398	529	534.5	533
	1.399	534.5	533.5	533
	1.4	530	532	531.5
	1.401	531	535	531
	1.402	533	534	533.5
	1.403	534	533.5	528.5
	1.404	533.5	533.5	527.5
	1.405	531.5	537.5	529
	1.406	535.5	532.5	529.5
	1.407	534.5	533	529.5
	1.408	529	533.5	533
	1.409	533	531	529.5
	1.41	534.5	534.5	532
	1.411	532	532.5	526.5
	1.412	531.5	535	530
	1.413	530	537	529
	1.414	535	534	528
	1.415	531.5	533.5	533
	1.416	530	539.5	533.5
	1.417	530	536	529
	1.418	531.5	538	528.5
	1.419	527	534.5	533.5
	1.42	533.5	535.5	529
	1.421	529.5	531	531.5
	1.422	532.5	535.5	530
	1.423	533.5	534.5	529.5
	1.424	529	531.5	526.5
	1.425	528.5	534	530.5
	1.426	532.5	534	526
	1.427	535.5	533	531
	1.428	529.5	534	528
	1.429	531	533	530
	1.43	529	530	527
	1.431	528.5	535.5	531.5
	1.432	528	531.5	524.5
	1.433	529	531	524.5
	1.434	528.5	534.5	528.5
	1.435	527.5	532	530
	1.436	530.5	533	530.5
	1.437	532	531	529
	1.438	530	530	527
	1.439	530.5	530.5	529
	1.44	534	531.5	527
	1.441	529.5	532	527
	1.442	533	534	524.5
	1.443	528.5	533.5	527
	1.444	529	529.5	530.5
	1.445	530	530.5	523.5
	1.446	533	530	528
	1.447	532	532	530.5
	1.448	533	530	527.5
	1.449	526.5	529	528.5
	1.45	530	528.5	528
	1.451	531	532	528.5
	1.452	526.5	531.5	526.5
	1.453	532	526.5	528
	1.454	532	528	526.5
	1.455	534.5	526.5	522.5
	1.456	533.5	532	524.5
	1.457	532.5	530	526.5
	1.458	531.5	532	526.5
	1.459	533	533	529.5
	1.46	531.5	532.5	526
	1.461	529.5	529.5	526.5
	1.462	537	531	529.5
	1.463	532	533	528
	1.464	534.5	532.5	526
	1.465	532	532.5	528.5
	1.466	536	532	526.5
	1.467	533	526.5	529.5
	1.468	534.5	531	526.5
	1.469	539	528	526.5
	1.47	534.5	527	528.5
	1.471	535	528.5	526.5
	1.472	539	527.5	524.5
	1.473	536.5	532	526.5
	1.474	539	528	524.5
	1.475	535.5	526	531
	1.476	535.5	531.5	524
	1.477	539	530.5	529.5
	1.478	535	529.5	530
	1.479	534.5	530	528.5
	1.48	538	530	524.5
	1.481	537.5	531	530
	1.482	536	532	524.5
	1.483	539.5	527.5	527.5
	1.484	537	526.5	526.5
	1.485	535.5	531.5	526.5
	1.486	539	528	528
	1.487	540.5	533	529.5
	1.488	535.5	526.5	532.5
	1.489	537.5	529	528
	1.49	539.5	530	530
	1.491	541	528.5	530.5
	1.492	534	526.5	528.5
	1.493	537.5	530.5	526
	1.494	536.5	531	529.5
	1.495	540	531	528
	1.496	540.5	528.5	527.5
	1.497	538	528	526
	1.498	535.5	527.5	527.5
	1.499	536.5	527.5	528.5
	1.5	538	528	526.5
	1.501	536.5	533	529
	1.502	535	528	531
	1.503	536	529	524.5
	1.504	539.5	529	531.5
	1.505	539	529.5	528
	1.506	540	531	528.5
	1.507	539.5	526	527
	1.508	536.5	530	529.5
	1.509	536.5	531.5	526.5
	1.51	535	528	532
	1.511	533.5	531	529
	1.512	539.5	533.5	529
	1.513	539.5	532	524.5
	1.514	537.5	532.5	527
	1.515	538.5	530.5	526.5
	1.516	536.5	529.5	527.5
	1.517	538	532	524.5
	1.518	536	529	524.5
	1.519	533.5	529.5	524.5
	1.52	535	532.5	522
	1.521	535	533	524.5
	1.522	536.5	530	524.5
	1.523	539.5	529.5	524.5
	1.524	535	532	523.5
	1.525	532.5	525.5	527.5
	1.526	535	527.5	524.5
	1.527	533.5	530.5	520.5
	1.528	533.5	528.5	522.5
	1.529	532.5	530	526.5
	1.53	532	528	524.5
	1.531	533	523.5	524.5
	1.532	534	526.5	524.5
	1.533	528.5	529.5	526
	1.534	533.5	528	521
	1.535	534	530	523
	1.536	531.5	530.5	524
	1.537	531.5	531	528
	1.538	531	527.5	522
	1.539	529	527.5	522.5
	1.54	527	528.5	523.5
	1.541	531.5	530.5	522.5
	1.542	531	529.5	523.5
	1.543	528	531.5	524.5
	1.544	533.5	530	526
	1.545	530	528.5	519.5
	1.546	530	531.5	523.5
	1.547	530	529	522
	1.548	531	529.5	522.5
	1.549	530.5	531.5	520.5
	1.55	529.5	526.5	525.5
	1.551	531.5	531.5	520.5
	1.552	531.5	529.5	524.5
	1.553	529	526.5	523.5
	1.554	530	529	520
	1.555	529	533.5	521
	1.556	530.5	532	520
	1.557	531	530	521.5
	1.558	531.5	530.5	523.5
	1.559	529.5	530	524.5
	1.56	528.5	530.5	522.5
	1.561	531.5	530	523.5
	1.562	527.5	527.5	523.5
	1.563	531	530.5	524.5
	1.564	530	530.5	524.5
	1.565	531.5	528	521
	1.566	531.5	531.5	519
	1.567	530	533	521
	1.568	531.5	532	517.5
	1.569	529.5	529.5	520.5
	1.57	531.5	534.5	524.5
	1.571	530	534	523.5
	1.572	528	534.5	524
	1.573	529.5	528	519.5
	1.574	531.5	531	523
	1.575	529.5	530	523
	1.576	529.5	531.5	522
	1.577	530	530	519
	1.578	531.5	531.5	523
	1.579	528	531.5	521.5
	1.58	531	528	524
	1.581	531.5	534.5	519.5
	1.582	532	527.5	522.5
	1.583	533.5	531	523.5
	1.584	533.5	528.5	522.5
	1.585	529	533.5	521.5
	1.586	531	529.5	519.5
	1.587	530.5	532	520
	1.588	531.5	530.5	518.5
	1.589	530.5	534.5	524.5
	1.59	533.5	527.5	522
	1.591	530.5	530.5	522
	1.592	528.5	531.5	521
	1.593	533.5	532	520
	1.594	534	529	524.5
	1.595	533	531.5	524
	1.596	533.5	529.5	519.5
	1.597	533.5	531.5	521
	1.598	533.5	530	524.5
	1.599	532.5	531	519.5
	1.6	532.5	533.5	520.5
	1.601	531	530.5	521.5
	1.602	533.5	532	523
	1.603	531.5	532	521
	1.604	531.5	530	522.5
	1.605	532	532.5	522.5
	1.606	535	532	523
	1.607	533	532	521.5
	1.608	535	533	520.5
	1.609	528.5	532.5	524.5
	1.61	534	528.5	526.5
	1.611	535.5	531.5	523.5
	1.612	531.5	530.5	522.5
	1.613	533	531	521.5
	1.614	532	532.5	519.5
	1.615	537	531.5	520
	1.616	536	531	521.5
	1.617	535.5	534.5	524.5
	1.618	535	529	522
	1.619	533.5	530.5	524
	1.62	535.5	533.5	523
	1.621	532	531.5	518
	1.622	533.5	533.5	519.5
	1.623	534.5	529	523
	1.624	533.5	533.5	523
	1.625	533.5	530.5	524.5
	1.626	533.5	533.5	520
	1.627	536	529.5	521.5
	1.628	533.5	531	524
	1.629	534.5	534.5	521
	1.63	533.5	533.5	520
	1.631	532.5	537.5	522.5
	1.632	535.5	533.5	523.5
	1.633	534	536.5	524.5
	1.634	534	533.5	521
	1.635	533.5	531.5	520.5
	1.636	533.5	534	519.5
	1.637	533.5	533	522
	1.638	535	532.5	524.5
	1.639	536.5	533	517
	1.64	534.5	532	520.5
	1.641	532	537	519.5
	1.642	535	533.5	520
	1.643	533	533.5	519.5
	1.644	533.5	535	522.5
	1.645	535	534	516
	1.646	535	534	516.5
	1.647	533.5	533.5	519
	1.648	534.5	533.5	519.5
	1.649	530.5	533.5	517.5
	1.65	534.5	534.5	515
	1.651	537.5	535	515
	1.652	534.5	533.5	515.5
	1.653	533	533.5	517
	1.654	536.5	533.5	515.5
	1.655	533.5	534	513
	1.656	534.5	537	514
	1.657	534	533.5	518.5
	1.658	534	533.5	513.5
	1.659	536	534.5	519
	1.66	535.5	535	514
	1.661	537	534.5	513
	1.662	535.5	533.5	510.5
	1.663	537	533.5	513.5
	1.664	536.5	533.5	514
	1.665	537.5	533.5	511.5
	1.666	534.5	530.5	515
	1.667	540	536.5	511
	1.668	538	532.5	512.5
	1.669	535.5	535	509.5
	1.67	538	530.5	512
	1.671	537.5	533.5	511.5
	1.672	539.5	529.5	506.5
	1.673	537	533.5	510
	1.674	536.5	530	512
	1.675	539	532.5	509
	1.676	534.5	531	506
	1.677	536.5	533	509.5
	1.678	538.5	532.5	510
	1.679	537	533.5	507
	1.68	539.5	531	506
	1.681	537.5	528.5	504.5
	1.682	539.5	526.5	505.5
	1.683	537	526	505.5
	1.684	538	526.5	505.5
	1.685	537	526	506.5
	1.686	535.5	526.5	507
	1.687	537	526	501.5
	1.688	533.5	529	503.5
	1.689	537.5	526.5	500.5
	1.69	537	524.5	502
	1.691	533.5	526	500.5
	1.692	538	526.5	500
	1.693	535.5	526	498.5
	1.694	535	524.5	502
	1.695	534	524.5	500.5
	1.696	534	524.5	498.5
	1.697	537.5	527	499.5
	1.698	536	524.5	494.5
	1.699	536	523	498.5
	1.7	536	524.5	497.5
	1.701	534	523	494.5
	1.702	535	523	499
	1.703	534.5	526.5	491.5
	1.704	539.5	523.5	498
	1.705	535	524.5	494
	1.706	536	523.5	492.5
	1.707	536.5	521.5	494.5
	1.708	536.5	521	494.5
	1.709	535.5	522.5	496.5
	1.71	533.5	521.5	494
	1.711	535	522	491.5
	1.712	533.5	519.5	492.5
	1.713	537.5	521	491.5
	1.714	532.5	523	492
	1.715	534.5	521	494
	1.716	533	524	490.5
	1.717	533	521	492
	1.718	534.5	522.5	486
	1.719	534	519	486.5
	1.72	533.5	520	487
	1.721	532.5	520	488.5
	1.722	534	519.5	486
	1.723	531.5	522	488
	1.724	533	523.5	487
	1.725	531	521.5	485.5
	1.726	535	523	483
	1.727	532	521	485.5
	1.728	531	524.5	483.5
	1.729	533.5	519.5	484.5
	1.73	531.5	519.5	482.5
	1.731	534	521.5	485.5
	1.732	537	520	480
	1.733	531	523	485
	1.734	536	518	479.5
	1.735	531	522	480
	1.736	535	522	481
	1.737	533.5	520.5	478.5
	1.738	537.5	523	477
	1.739	536	520.5	479
	1.74	530	519	477.5
	1.741	532	518.5	475.5
	1.742	535.5	522	474
	1.743	536.5	518	476.5
	1.744	535	519	475.5
	1.745	534.5	519.5	474
	1.746	531.5	520.5	470.5
	1.747	532	515	474
	1.748	531	519.5	472
	1.749	537.5	518	472
	1.75	533.5	522.5	471.5
	1.751	533	523.5	469
	1.752	534.5	521.5	469.5
	1.753	534.5	519.5	468
	1.754	532	520	467.5
	1.755	533.5	520	465
	1.756	532.5	520.5	468.5
	1.757	538	519.5	466.5
	1.758	536	521	471.5
	1.759	533	525.5	468
	1.76	535.5	521.5	463
	1.761	534	516.5	466
	1.762	534	519	464.5
	1.763	533.5	519.5	466
	1.764	533.5	521	462
	1.765	532	522	463
	1.766	536.5	522.5	465
	1.767	536.5	518	458.5
	1.768	533.5	522	461
	1.769	536	518.5	459
	1.77	533.5	518	463.5
	1.771	537	518.5	461.5
	1.772	539	521.5	457.5
	1.773	535.5	519.5	462
	1.774	536.5	517	461.5
	1.775	538	518	456
	1.776	538.5	522.5	456.5
	1.777	534	521.5	456
	1.778	533.5	519.5	457.5
	1.779	535	518.5	453.5
	1.78	533	521.5	453.5
	1.781	536	519	451
	1.782	535.5	522	453.5
	1.783	532	519	451
	1.784	534.5	519.5	450
	1.785	538.5	518	450.5
	1.786	537	517.5	449
	1.787	535.5	518.5	450.5
	1.788	539.5	518.5	449.5
	1.789	533.5	522	447
	1.79	532.5	522	444.5
	1.791	535.5	518.5	444.5
	1.792	534.5	523.5	443
	1.793	536	519	442.5
	1.794	537	518.5	442.5
	1.795	536	517	438
	1.796	533.5	518	437.5
	1.797	535.5	519	436.5
	1.798	534.5	520	437
	1.799	533.5	520	437.5
	1.8	534.5	520	434
	1.801	534	520.5	433
	1.802	534	519.5	432
	1.803	535.5	518.5	433.5
	1.804	536	520	428.5
	1.805	536	518	424.5
	1.806	537	516.5	427.5
	1.807	538.5	518.5	427.5
	1.808	533	516.5	426.5
	1.809	538	519.5	425.5
	1.81	536.5	517.5	421
	1.811	536.5	519	422.5
	1.812	534	518	421
	1.813	537	515.5	425.5
	1.814	535.5	515.5	417
	1.815	533	514	416
	1.816	534.5	518	415.5
	1.817	536.5	516.5	414
	1.818	532	515	413
	1.819	531	517.5	409
	1.82	536.5	514	411
	1.821	533.5	518.5	408.5
	1.822	535	517	404.5
	1.823	533.5	512.5	405
	1.824	536.5	514	403.5
	1.825	534.5	514	403.5
	1.826	536.5	514	399.5
	1.827	533	513	400
	1.828	535	513	401.5
	1.829	531.5	514	396
	1.83	533	513	395
	1.831	530.5	514	399
	1.832	537	511	395.5
	1.833	532	514.5	392.5
	1.834	535.5	510.5	393.5
	1.835	533.5	511.5	389.5
	1.836	535	510.5	388.5
	1.837	530	511.5	387.5
	1.838	533.5	514	389.5
	1.839	533.5	513	385
	1.84	533	512.5	386.5
	1.841	531	510	387.5
	1.842	535.5	510	383.5
	1.843	534.5	506.5	382
	1.844	535	508	382
	1.845	531.5	506	382.5
	1.846	532.5	505	384
	1.847	535	510	379.5
	1.848	535	506	377.5
	1.849	531.5	507.5	382
	1.85	534	504	380
	1.851	531	507	381.5
	1.852	537	505.5	379
	1.853	532	505.5	380.5
	1.854	534.5	503	378
	1.855	535.5	505	383
	1.856	532	500	380.5
	1.857	532.5	503	379.5
	1.858	531	503	385
	1.859	532	502	384.5
	1.86	533	499.5	385
	1.861	531	499	384
	1.862	528	499	384
	1.863	532	498	387.5
	1.864	533.5	500	383
	1.865	531.5	499.5	385
	1.866	530.5	497.5	383.5
	1.867	533	497	391.5
	1.868	533	493.5	390.5
	1.869	535	488.5	384.5
	1.87	528	492.5	388
	1.871	533	493.5	390
	1.872	527.5	488	391.5
	1.873	532.5	488.5	388
	1.874	530	490	389.5
	1.875	531.5	487.5	392.5
	1.876	531	487	394
	1.877	533	489	394
	1.878	526.5	485.5	394
	1.879	532	484	391.5
	1.88	529.5	486	394
	1.881	527	483.5	395
	1.882	530.5	483.5	395.5
	1.883	527.5	478.5	393.5
	1.884	529	479	398
	1.885	531	477.5	399.5
	1.886	528	478.5	397.5
	1.887	532.5	475.5	399.5
	1.888	528	475	397.5
	1.889	524.5	471.5	399.5
	1.89	530.5	471	397.5
	1.891	529	472	397.5
	1.892	526.5	471.5	398
	1.893	528	468.5	399.5
	1.894	521	471.5	401
	1.895	529.5	467	398.5
	1.896	523.5	462.5	402.5
	1.897	527	465	400.5
	1.898	524.5	463	402
	1.899	527	461.5	403
	1.9	523.5	462.5	398.5
	1.901	524.5	463.5	405
	1.902	526.5	460.5	403
	1.903	524.5	456.5	404
	1.904	522	457.5	401.5
	1.905	527	458	399.5
	1.906	524.5	458	403
	1.907	523	454.5	402.5
	1.908	523	451	405
	1.909	523	451	402.5
	1.91	524.5	453.5	404
	1.911	522	450.5	403
	1.912	520.5	452.5	405
	1.913	520.5	452	401.5
	1.914	519.5	455	402.5
	1.915	519	451	402.5
	1.916	522.5	451.5	403.5
	1.917	521.5	448.5	399.5
	1.918	523	449.5	404
	1.919	524.5	450	398.5
	1.92	520	446	401
	1.921	522.5	446	399
	1.922	519.5	449.5	398
	1.923	519.5	446.5	398
	1.924	520.5	448	397.5
	1.925	519	448.5	398.5
	1.926	518.5	444	400
	1.927	520	441.5	392.5
	1.928	520	443	395.5
	1.929	517.5	438	396.5
	1.93	517	440	390.5
	1.931	514	437.5	394
	1.932	517	438.5	391
	1.933	518.5	434.5	390
	1.934	518	435	389
	1.935	513	432	388.5
	1.936	518	433	387.5
	1.937	514	428.5	383.5
	1.938	514.5	428	387.5
	1.939	512	427	385.5
	1.94	516.5	424.5	383.5
	1.941	517	423	385
	1.942	511.5	424	384.5
	1.943	516	422.5	386
	1.944	515	419.5	382
	1.945	517	418.5	386
	1.946	512	418	384.5
	1.947	518	415	383
	1.948	513	411	393
	1.949	514.5	411	388.5
	1.95	512	411.5	390
	1.951	513	412	394
	1.952	509	409	396.5
	1.953	508.5	405	396
	1.954	511.5	404.5	401.5
	1.955	509.5	404	403.5
	1.956	513	403.5	410
	1.957	510	401	408.5
	1.958	510.5	399.5	410.5
	1.959	510.5	400.5	415
	1.96	507.5	398.5	417.5
	1.961	512	396	418
	1.962	506	396	426.5
	1.963	508	396.5	424.5
	1.964	508	393.5	428.5
	1.965	506	391.5	433
	1.966	509	389.5	431.5
	1.967	505	390	434.5
	1.968	506	391	437.5
	1.969	506	386	441.5
	1.97	506	383.5	446
	1.971	505	381.5	448
	1.972	506	383	451
	1.973	504	383	454.5
	1.974	506.5	378	457
	1.975	504.5	375.5	458.5
	1.976	507	377.5	461.5
	1.977	503	373.5	462.5
	1.978	503.5	374	464.5
	1.979	505.5	373	463
	1.98	503	369	466.5
	1.981	504	366.5	467
	1.982	505	369	470
	1.983	500.5	363.5	468
	1.984	500.5	362	473
	1.985	500	360.5	470.5
	1.986	500.5	361	471
	1.987	503	360.5	469
	1.988	499	355	474
	1.989	503	356	473
	1.99	499	350.5	473
	1.991	499	352.5	472
	1.992	499.5	349	474.5
	1.993	494	351	474
[truncated: 6,006 more rows]

## Sheet: B
DataTypeVer2.0	Time	Fz	Fz	Fz
NumberOfData		8000	8000	8000
PreTriggerData		0	0	0
SamplingTime[ms]		1	1	1
DataLabel		R1:CMJ	R2:CMJ	R3:CMJ
DataUnit	sec	N	N	N
	0	663.5	704.5	703
	0.001	661.5	700.5	702.5
	0.002	662.5	704.5	703
	0.003	660.5	704.5	699.5
	0.004	662.5	704.5	700.5
	0.005	663.5	707.5	702.5
	0.006	662.5	704	702.5
	0.007	663.5	702.5	702
	0.008	657.5	702.5	704.5
	0.009	658.5	703	702.5
	0.01	660.5	702.5	702
	0.011	661.5	698.5	702
	0.012	663	703.5	706
	0.013	662	704.5	702
	0.014	660.5	708.5	702.5
	0.015	663.5	703	703.5
	0.016	664.5	703	699.5
	0.017	664.5	705	701.5
	0.018	665	705.5	704
	0.019	665	706.5	705
	0.02	667.5	703	702
	0.021	668	704.5	704.5
	0.022	670	706	700.5
	0.023	669.5	704.5	702.5
	0.024	670	701.5	701.5
	0.025	672	707	704.5
	0.026	676.5	702.5	702
	0.027	673.5	702	704
	0.028	676	700.5	704
	0.029	680	707	705
	0.03	678.5	706.5	705
	0.031	679	700	700.5
	0.032	680	702	704
	0.033	682	703.5	702.5
	0.034	680	704.5	702.5
	0.035	683.5	704.5	702
	0.036	686	704.5	704
	0.037	685	698	701
	0.038	686	702.5	702.5
	0.039	688.5	701.5	702.5
	0.04	688.5	702	700
	0.041	689.5	702	704.5
	0.042	692.5	704.5	701.5
	0.043	694	701.5	700.5
	0.044	695	703	702.5
	0.045	693.5	701	705.5
	0.046	695	699.5	700
	0.047	695	698.5	704
	0.048	700.5	700	703
	0.049	701.5	701.5	704
	0.05	698.5	698.5	702
	0.051	697.5	698.5	701
	0.052	702	701.5	701
	0.053	700.5	701.5	702.5
	0.054	704.5	704	703
	0.055	708	704	698.5
	0.056	704	701	698.5
	0.057	707	700	701
	0.058	705.5	698	698.5
	0.059	707.5	704	701.5
	0.06	708	702.5	701
	0.061	705	699.5	702
	0.062	708	702	698
	0.063	706	702	695
	0.064	709	702.5	700.5
	0.065	709.5	695	701.5
	0.066	708	702	702
	0.067	710	702	700
	0.068	709.5	699.5	704
	0.069	710	699	702
	0.07	710	697	698.5
	0.071	714	700.5	699.5
	0.072	714.5	701.5	702.5
	0.073	714	701	703
	0.074	711.5	701.5	700.5
	0.075	711.5	700.5	698
	0.076	712	698.5	700
	0.077	716.5	702	700.5
	0.078	714.5	698.5	699.5
	0.079	712	701	701.5
	0.08	714.5	699	705
	0.081	711.5	701.5	703.5
	0.082	712.5	701	704
	0.083	714	703	700.5
	0.084	714.5	703	702.5
	0.085	712.5	695	707
	0.086	713.5	703.5	706.5
	0.087	715	699.5	704.5
	0.088	712.5	699	703
	0.089	711	697.5	705.5
	0.09	708	697.5	705.5
	0.091	710	695	705
	0.092	714.5	702.5	705
	0.093	713	698.5	707
	0.094	710	702.5	707
	0.095	709.5	699.5	704.5
	0.096	709	700.5	706
	0.097	713	699.5	708.5
	0.098	712.5	701.5	707.5
	0.099	711.5	699.5	704.5
	0.1	710	698.5	704.5
	0.101	710	695	707
	0.102	709	700.5	708
	0.103	707	698	704.5
	0.104	712.5	702.5	704.5
	0.105	709.5	700.5	704.5
	0.106	710	700.5	706.5
	0.107	713.5	698.5	703.5
	0.108	710	698.5	707.5
	0.109	710	695	705
	0.11	711	698.5	705
	0.111	713	703.5	706
	0.112	711	701	707
	0.113	711	697.5	704.5
	0.114	715	697.5	706.5
	0.115	714	700.5	705.5
	0.116	713.5	697.5	708
	0.117	711.5	697.5	706
	0.118	712	698	708
	0.119	715.5	698	705
	0.12	715.5	701	704.5
	0.121	714.5	697.5	705.5
	0.122	717.5	698.5	705.5
	0.123	717	697.5	705.5
	0.124	714	701.5	701.5
	0.125	714.5	697.5	701.5
	0.126	712	695	703.5
	0.127	717	700	704.5
	0.128	716.5	699.5	704.5
	0.129	717.5	701	701.5
	0.13	718	698.5	703.5
	0.131	712	701.5	700
	0.132	716	697	702.5
	0.133	718	698	704.5
	0.134	719	697.5	699
	0.135	720.5	695	702.5
	0.136	716	702	702
	0.137	720	698.5	698.5
	0.138	718.5	701	703
	0.139	717.5	698.5	700
	0.14	720.5	702	698
	0.141	716	699.5	697.5
	0.142	716	701.5	701
	0.143	717.5	701	695
	0.144	716	698	695
	0.145	712.5	703.5	702.5
	0.146	717.5	701.5	697.5
	0.147	718.5	701	702.5
	0.148	720.5	701	699
	0.149	717	700.5	694.5
	0.15	717.5	703	701.5
	0.151	717.5	704.5	697.5
	0.152	710	702.5	697
	0.153	714.5	702.5	695
	0.154	710	702	698
	0.155	714	702.5	695
	0.156	714	704.5	695
	0.157	713.5	704.5	691.5
	0.158	712.5	704.5	694
	0.159	715	705	697.5
	0.16	711.5	704.5	695
	0.161	710	706	695
	0.162	710	703	695
	0.163	712	705.5	695
	0.164	709	706	699
	0.165	710	705	694
	0.166	708.5	710	694.5
	0.167	709	708	695
	0.168	710	709	695
	0.169	707.5	710	695
	0.17	707	706.5	695
	0.171	708	707	695
	0.172	709	704.5	695
	0.173	708.5	708.5	695
	0.174	704	711.5	695
	0.175	703.5	707	697.5
	0.176	707	709.5	695
	0.177	703.5	709	698.5
	0.178	703.5	706	695
	0.179	702.5	707	695
	0.18	703.5	711	698
	0.181	699.5	710	697.5
	0.182	699.5	711.5	699
	0.183	699.5	706.5	695
	0.184	698	709	700
	0.185	698.5	710	692.5
	0.186	697.5	714.5	698
	0.187	702.5	707	697.5
	0.188	695	708	695
	0.189	695	710	700.5
	0.19	698.5	712.5	700
	0.191	693	707	701.5
	0.192	695	710	698
	0.193	692.5	710	695
	0.194	692.5	710	697.5
	0.195	693	711.5	700
	0.196	694.5	712.5	700
	0.197	692	710	701
	0.198	691.5	709.5	697.5
	0.199	693	711.5	701
	0.2	692.5	708.5	701
	0.201	688.5	704.5	702.5
	0.202	690.5	707.5	702.5
	0.203	688.5	711.5	703
	0.204	689	707	704.5
	0.205	689.5	708	704.5
	0.206	689	705	704
	0.207	690	706.5	703
	0.208	687	707	700.5
	0.209	692.5	707.5	705.5
	0.21	688	709.5	703
	0.211	692	703.5	701
	0.212	689.5	711.5	703
	0.213	690.5	706.5	703
	0.214	689.5	707.5	702
	0.215	687.5	706	703.5
	0.216	690.5	709	704.5
	0.217	689	709.5	701
	0.218	690.5	708.5	704.5
	0.219	687	706.5	702.5
	0.22	688.5	705.5	700.5
	0.221	687	707.5	707.5
	0.222	689	708	703.5
	0.223	688	707	703.5
	0.224	687.5	705.5	702.5
	0.225	689.5	704.5	707
	0.226	686.5	703.5	704.5
	0.227	686.5	704.5	703
	0.228	689.5	708.5	702.5
	0.229	691.5	707.5	706
	0.23	687	704.5	703.5
	0.231	688	704.5	702.5
	0.232	687	706	703
	0.233	687	703	703.5
	0.234	686	706	701.5
	0.235	686.5	704.5	700.5
	0.236	687.5	704.5	702
	0.237	689.5	704.5	701
	0.238	686	707.5	701
	0.239	689.5	702.5	702
	0.24	690.5	703	703
	0.241	690	705	705.5
	0.242	690.5	702	701.5
	0.243	686	703	704
	0.244	688.5	702	698.5
	0.245	687.5	699	699.5
	0.246	688.5	700	701.5
	0.247	687	702.5	699.5
	0.248	688.5	702.5	704.5
	0.249	686	697.5	702
	0.25	689	702.5	701.5
	0.251	688	699	701.5
	0.252	690	702	700.5
	0.253	687	699.5	698.5
	0.254	686	698.5	698.5
	0.255	687.5	694	695
	0.256	687	702	700
	0.257	683.5	695	695
	0.258	692	701	704
	0.259	687.5	695	698
	0.26	687.5	699	701
	0.261	687.5	695	699
	0.262	690.5	699.5	698
	0.263	687.5	699.5	699
	0.264	689	695	697.5
	0.265	688.5	698	695
	0.266	687.5	695	697.5
	0.267	691	695	699
	0.268	691	698	695
	0.269	692	697.5	697.5
	0.27	693	694	695
	0.271	693	695	695
	0.272	694.5	695	695
	0.273	694	695	695
	0.274	695	690.5	695
	0.275	695	695	695
	0.276	697.5	695	695
	0.277	702.5	694.5	698
	0.278	695	695	697.5
	0.279	698.5	697.5	698.5
	0.28	701.5	695	695
	0.281	699	694.5	693.5
	0.282	700	695	693.5
	0.283	700.5	698.5	695
	0.284	699.5	694.5	695
	0.285	702	698	695
	0.286	705	695	694
	0.287	700	693	695
	0.288	700.5	692.5	692
	0.289	703.5	695	695
	0.29	705	694	694
	0.291	706.5	695	695
	0.292	702	693.5	693
	0.293	704	695	693.5
	0.294	707	694	694
	0.295	704.5	693.5	694.5
	0.296	704	694.5	692.5
	0.297	703	695	692.5
	0.298	706	690.5	694.5
	0.299	704.5	692.5	695
	0.3	704.5	693	694
	0.301	704	692	692.5
	0.302	705	694.5	693
	0.303	704.5	693.5	695
	0.304	706.5	690.5	694.5
	0.305	706	691.5	695
	0.306	705	691.5	693
	0.307	704	694.5	695
	0.308	703	691.5	693
	0.309	708	695	695
	0.31	708	692.5	695
	0.311	703	694.5	691
	0.312	708	693	692
	0.313	706.5	690	694.5
	0.314	705.5	689.5	695
	0.315	704.5	693	695
	0.316	709.5	689.5	692.5
	0.317	708.5	691	695
	0.318	707	689	694
	0.319	703.5	690.5	694.5
	0.32	705	690.5	694
	0.321	704.5	691.5	695
	0.322	704.5	691	694.5
	0.323	702.5	694.5	695
	0.324	707	691.5	693
	0.325	705.5	693.5	694.5
	0.326	706.5	690.5	692
	0.327	705.5	689	695
	0.328	706	689.5	699
	0.329	703	690.5	695
	0.33	707	694.5	697.5
	0.331	705.5	692	697
	0.332	705	690	697
	0.333	703.5	690.5	694.5
	0.334	704	692	694
	0.335	707	691	697
	0.336	708	695	695
	0.337	708	694	697
	0.338	710	695	697
	0.339	706	692.5	698.5
	0.34	707	695	695
	0.341	707.5	690.5	695
	0.342	709.5	694.5	695
	0.343	706	688	698.5
	0.344	710	691.5	697.5
	0.345	707	694.5	697.5
	0.346	707	692.5	698.5
	0.347	706	691	698.5
	0.348	708	693.5	695
	0.349	710	695	694.5
	0.35	709	693	701
	0.351	708	692.5	699.5
	0.352	711	695	697.5
	0.353	707	693	699
	0.354	706	693.5	702
	0.355	708.5	695	699.5
	0.356	706.5	695	701
	0.357	706	695	701.5
	0.358	706	693	704
	0.359	706.5	695	702
	0.36	704.5	692	697.5
	0.361	705.5	693.5	700
	0.362	704.5	695	704.5
	0.363	706.5	694.5	704
	0.364	707	699.5	702
	0.365	710	695	699.5
	0.366	704.5	695	701.5
	0.367	708.5	695	704.5
	0.368	705	697.5	701.5
	0.369	704.5	695	699.5
	0.37	708.5	699	702
	0.371	702.5	697.5	703
	0.372	704	695	701
	0.373	704.5	698.5	701.5
	0.374	703.5	702.5	702
	0.375	699.5	700.5	700
	0.376	699.5	702.5	702.5
	0.377	701.5	700	701
	0.378	700.5	702.5	702.5
	0.379	695	698.5	702.5
	0.38	697.5	704.5	699
	0.381	700	704	703.5
	0.382	698	701.5	704.5
	0.383	700.5	704.5	705
	0.384	697.5	702.5	704.5
	0.385	700	703	700.5
	0.386	695	704.5	701
	0.387	694.5	705.5	702.5
	0.388	692.5	702	704.5
	0.389	695	706	706
	0.39	694.5	710	704.5
	0.391	691.5	707	706
	0.392	694	704.5	702
	0.393	690.5	705	703
	0.394	694.5	705	704.5
	0.395	695	707	704.5
	0.396	695	703	706
	0.397	693.5	705.5	706.5
	0.398	694	705	702.5
	0.399	691.5	705.5	704.5
	0.4	692	705.5	704.5
	0.401	694	704	705
	0.402	694	706	706
	0.403	690.5	705	703.5
	0.404	694	705.5	704
	0.405	694	706	708.5
	0.406	691.5	706	705.5
	0.407	692.5	704	704.5
	0.408	695	705.5	706
	0.409	689.5	704.5	704.5
	0.41	691.5	704	706
	0.411	689.5	707.5	705.5
	0.412	693	706	710
	0.413	693.5	704	709
	0.414	695	704.5	705.5
	0.415	695	704.5	709
	0.416	693.5	704.5	709
	0.417	691	704.5	708.5
	0.418	693.5	704	706
	0.419	692.5	706.5	705
	0.42	694	704	707
	0.421	693.5	707.5	707
	0.422	694	706.5	708
	0.423	694	706.5	710
	0.424	695	709	706
	0.425	691	700.5	710
	0.426	693	702.5	708
	0.427	692.5	705	710
	0.428	694.5	708	710
	0.429	695	706.5	710
	0.43	694.5	708.5	708
	0.431	692.5	705.5	711
	0.432	697.5	705.5	712.5
	0.433	693	706	709
	0.434	695	706	709
	0.435	695	707	711.5
	0.436	692.5	706	707
	0.437	695	704.5	713
	0.438	700	704	710
	0.439	695	707.5	710
	0.44	697.5	703.5	709.5
	0.441	695	709.5	708.5
	0.442	698.5	704	710
	0.443	700	705	708
	0.444	699.5	710	712
	0.445	695	711	709.5
	0.446	695	707	710
	0.447	697.5	705.5	706.5
	0.448	695	710	706
	0.449	697.5	710	709
	0.45	695	710	709.5
	0.451	698.5	714.5	709.5
	0.452	695	712	710
	0.453	698.5	712	710
	0.454	698	710	710
	0.455	697.5	710	708
	0.456	695	712	709.5
	0.457	698.5	714	708
	0.458	699.5	713	709
	0.459	698.5	712.5	704.5
	0.46	699	713	708
	0.461	698.5	713.5	707.5
	0.462	700.5	713.5	711
	0.463	698.5	715.5	706
	0.464	695	710	709
	0.465	698.5	709	708
	0.466	695	710	707.5
	0.467	695	714	707
	0.468	695	719.5	708
	0.469	695	717	709
	0.47	698.5	715	706
	0.471	699.5	715.5	706.5
	0.472	697.5	717.5	706.5
	0.473	700	717.5	705.5
	0.474	697.5	718	705.5
	0.475	701	715	709.5
	0.476	695	715.5	704.5
	0.477	700.5	716.5	706.5
	0.478	700.5	716.5	708
	0.479	697.5	717	706
	0.48	700.5	712.5	704.5
	0.481	697.5	719.5	704
	0.482	697.5	713	704.5
	0.483	698.5	717	705.5
	0.484	698	716	703
	0.485	698.5	716	704
	0.486	698.5	717.5	705.5
	0.487	698.5	715	705
	0.488	697.5	713.5	706.5
	0.489	700	712.5	705.5
	0.49	697.5	714	703.5
	0.491	698.5	713	705.5
	0.492	699.5	712.5	706.5
	0.493	695	712.5	707
	0.494	697.5	711.5	702
	0.495	695	710	705
	0.496	698.5	711.5	704.5
	0.497	698	711.5	706
	0.498	695	714	704.5
	0.499	698.5	709	704.5
	0.5	701	709.5	702
	0.501	695	710	703.5
	0.502	703	707	704
	0.503	702	707	704
	0.504	699.5	705.5	701.5
	0.505	699.5	706	702
	0.506	700	703.5	703
	0.507	703	701.5	701
	0.508	700	703	699.5
	0.509	697.5	700.5	704.5
	0.51	699.5	702.5	703.5
	0.511	704	698	701
	0.512	698.5	700.5	701
	0.513	702.5	699.5	702.5
	0.514	702.5	697.5	700.5
	0.515	705.5	698	704
	0.516	703.5	695	701
	0.517	702.5	695	702
	0.518	701.5	695	698.5
	0.519	704.5	695	701.5
	0.52	703	694	699
	0.521	703.5	694.5	698.5
	0.522	704	695	699
	0.523	705	693.5	703.5
	0.524	703.5	693.5	697
	0.525	703.5	691.5	700.5
	0.526	704.5	692.5	695
	0.527	703.5	690.5	697.5
	0.528	704.5	691	698.5
	0.529	702	691	695
	0.53	705	688.5	700.5
	0.531	705	686	700
	0.532	703.5	689	700
	0.533	707.5	687	701.5
	0.534	703	685	697.5
	0.535	704.5	687.5	695
	0.536	705	689.5	694.5
	0.537	706.5	683.5	697.5
	0.538	705	687.5	698.5
	0.539	707	687	697.5
	0.54	703.5	687	695
	0.541	702.5	683	695
	0.542	704.5	685	695
	0.543	704	684.5	695
	0.544	708.5	684.5	697.5
	0.545	702.5	685	695
	0.546	702	684.5	695
	0.547	702.5	684	695
	0.548	702	684.5	693.5
	0.549	703.5	684	695
	0.55	698.5	683.5	697.5
	0.551	700.5	684.5	700
	0.552	704.5	682	695
	0.553	702	684.5	698.5
	0.554	701	684	699
	0.555	702	683	698.5
	0.556	701.5	682.5	694.5
	0.557	700.5	685	698.5
	0.558	700.5	682	698.5
	0.559	702.5	684	700
	0.56	698	678	698.5
	0.561	697	685.5	695
	0.562	699	684	697.5
	0.563	698	681.5	695
	0.564	699.5	683	698
	0.565	697.5	687	699
	0.566	698.5	685	699.5
	0.567	702.5	680	698.5
	0.568	698	685	700
	0.569	698.5	682.5	702
	0.57	697.5	684	695
	0.571	695	683	698.5
	0.572	695	684	699
	0.573	695	683.5	699
	0.574	695	684	700
	0.575	697.5	682	701.5
	0.576	697.5	682.5	700
	0.577	695	686	697.5
	0.578	695	677.5	702
	0.579	695	683	701
	0.58	695	686	701
	0.581	695	688	703
	0.582	694	687.5	702.5
	0.583	695	687	699
	0.584	691	685	695
	0.585	694.5	686	700
	0.586	694.5	687	701
	0.587	694	687.5	700.5
	0.588	695	687.5	704.5
	0.589	692.5	687.5	698.5
	0.59	693.5	690	702
	0.591	690.5	692	702.5
	0.592	693	693	698.5
	0.593	693.5	690.5	704.5
	0.594	695	690.5	702.5
	0.595	689.5	689.5	700.5
	0.596	690.5	692.5	703.5
	0.597	694.5	693.5	701.5
	0.598	694.5	694	704.5
	0.599	694	691	705
	0.6	695	695	700.5
	0.601	695	695	701.5
	0.602	692	697.5	702
	0.603	693.5	697.5	705.5
	0.604	694.5	695	700
	0.605	690	698	701
	0.606	698.5	703.5	702.5
	0.607	693	700.5	702.5
	0.608	695	702.5	705
	0.609	693	703.5	703.5
	0.61	695	704	702.5
	0.611	692.5	706	706
	0.612	694	704.5	703
	0.613	695	706	703.5
	0.614	695	705	701
	0.615	695	707	703.5
	0.616	698.5	709	704
	0.617	699.5	710	700.5
	0.618	694.5	710	702.5
	0.619	695	712	705
	0.62	697.5	709.5	703.5
	0.621	698	710	706
	0.622	699	707.5	703.5
	0.623	700.5	709	702.5
	0.624	697.5	710	704.5
	0.625	695	710	704
	0.626	695	710	703
	0.627	697.5	712	702.5
	0.628	699	710	706
	0.629	697.5	713	702
	0.63	700.5	718	701
	0.631	700.5	712.5	705
	0.632	700	717.5	701.5
	0.633	700.5	712.5	701
	0.634	697.5	713	704
	0.635	701	713.5	701.5
	0.636	697.5	717	700
	0.637	698.5	717	702
	0.638	698	714.5	699.5
	0.639	698.5	718.5	701.5
	0.64	704	718	706
	0.641	697.5	717.5	701.5
	0.642	702.5	716.5	699
	0.643	701	715.5	700.5
	0.644	699	720	699
	0.645	702.5	717.5	703.5
	0.646	702.5	719.5	699.5
	0.647	703	715	698.5
	0.648	695	718.5	700
	0.649	701.5	718	702.5
	0.65	700.5	716	699.5
	0.651	700.5	717.5	701
	0.652	698.5	712	699
	0.653	699.5	717.5	698.5
	0.654	699	718.5	700.5
	0.655	695	715.5	700
	0.656	695	719	699
	0.657	695	717	698.5
	0.658	702	722	695
	0.659	702.5	718	698
	0.66	695	719	698.5
	0.661	702	717.5	698.5
	0.662	697.5	716	695
	0.663	698	720	698
	0.664	699	717.5	695
	0.665	700.5	718	695
	0.666	694.5	717.5	700.5
	0.667	698.5	714.5	695
	0.668	697.5	716	700
	0.669	697.5	718	695
	0.67	698	718.5	695
	0.671	694.5	715	698.5
	0.672	698	715	697.5
	0.673	695	710	700.5
	0.674	700	714	695
	0.675	695	711.5	697.5
	0.676	698	713	695
	0.677	697.5	714	698.5
	0.678	701	710	698
	0.679	700.5	711	705.5
	0.68	698	714.5	702.5
	0.681	695	715	700.5
	0.682	698.5	715	700
	0.683	698.5	711.5	699
	0.684	699.5	711.5	702.5
	0.685	697.5	718.5	698
	0.686	695	713	699.5
	0.687	695	709	701.5
	0.688	697.5	710	703.5
	0.689	695	711.5	699.5
	0.69	697.5	710	701
	0.691	698.5	710	702.5
	0.692	694.5	707.5	700
	0.693	695	709	700.5
	0.694	698	706.5	703.5
	0.695	695	708	699.5
	0.696	700.5	708.5	702.5
	0.697	697.5	710	702
	0.698	695	707	699.5
	0.699	699	705.5	697.5
	0.7	695	706	702.5
	0.701	695	703.5	703
	0.702	695	703	701
	0.703	695	707	704.5
	0.704	695	702.5	701
	0.705	695	704.5	699.5
	0.706	698	700	704.5
	0.707	700.5	703.5	699
	0.708	698	703	699.5
	0.709	698	700.5	702
	0.71	698	700.5	702.5
	0.711	699.5	700.5	703
	0.712	695	695	699.5
	0.713	702	701.5	699.5
	0.714	698	697.5	702.5
	0.715	700	700.5	703
	0.716	698	700.5	695
	0.717	697.5	698.5	699.5
	0.718	700.5	699.5	702.5
	0.719	698.5	697.5	699
	0.72	702.5	695	701.5
	0.721	695	695	697.5
	0.722	698.5	693.5	700
	0.723	699.5	699.5	700
	0.724	700	698.5	701
	0.725	700.5	695	698.5
	0.726	697.5	693	697.5
	0.727	701.5	697.5	701.5
	0.728	700	695	697.5
	0.729	700	694.5	698.5
	0.73	698.5	695	699.5
	0.731	700.5	694.5	697
	0.732	698	695	697.5
	0.733	700	694	695
	0.734	700.5	697.5	695
	0.735	700.5	695	700.5
	0.736	704.5	695	698
	0.737	700.5	692.5	697
	0.738	702.5	691.5	695
	0.739	701.5	695	697.5
	0.74	701.5	695	698.5
	0.741	700.5	695	695
	0.742	699.5	695	698
	0.743	699.5	694.5	695
	0.744	704.5	694	697.5
	0.745	704	693	698.5
	0.746	698.5	694	695
	0.747	700.5	693	697.5
	0.748	700	694	697
	0.749	699.5	693	695
	0.75	700.5	693.5	700
	0.751	701.5	695	698.5
	0.752	703	695	699
	0.753	700	694.5	697.5
	0.754	699.5	694.5	698
	0.755	699	694.5	698.5
	0.756	703.5	694	699.5
	0.757	698	694.5	698
	0.758	699.5	695	697.5
	0.759	702.5	698	702.5
	0.76	702.5	695	699
	0.761	699	693.5	697.5
	0.762	701	695	701.5
	0.763	697.5	695	699
	0.764	704.5	695	703
	0.765	701	699.5	699.5
	0.766	702.5	697.5	702.5
	0.767	699.5	698.5	701
	0.768	698.5	695	699
	0.769	700	697.5	703.5
	0.77	699.5	695	698
	0.771	702	695	702
	0.772	698	694	702
	0.773	700	694.5	699.5
	0.774	697.5	697.5	699
	0.775	695	694	701.5
	0.776	695	695	698.5
	0.777	702	692.5	704
	0.778	701	698	699.5
	0.779	699.5	695	706
	0.78	698.5	695	702.5
	0.781	698.5	693.5	702
	0.782	701.5	693	703
	0.783	695	695	700.5
	0.784	701.5	693	702.5
	0.785	700.5	693	703.5
	0.786	697.5	692	707
	0.787	699.5	693	702.5
	0.788	701	690.5	703.5
	0.789	698.5	694	706
	0.79	698.5	691	705.5
	0.791	697.5	690	698
	0.792	699.5	692.5	703.5
	0.793	697.5	690.5	700.5
	0.794	700.5	689.5	705
	0.795	695	690	703
	0.796	698.5	691	704.5
	0.797	701	687.5	704.5
	0.798	697.5	687.5	703.5
	0.799	695	690	705.5
	0.8	697.5	689	706
	0.801	695	688.5	707
	0.802	695	691	704.5
	0.803	695	688.5	702.5
	0.804	698.5	690	705
	0.805	698.5	689	704
	0.806	700	687.5	704
	0.807	698	687.5	707.5
	0.808	698.5	688	705.5
	0.809	697.5	686.5	702.5
	0.81	694	686.5	705.5
	0.811	695	691	704.5
	0.812	695	686	704.5
	0.813	697.5	688.5	702.5
	0.814	700.5	688	704
	0.815	698.5	685	704.5
	0.816	697	687.5	705
	0.817	699	688.5	704
	0.818	697.5	690.5	702.5
	0.819	704	687	706
	0.82	697	690.5	705
	0.821	695	690.5	704.5
	0.822	698.5	687.5	702.5
	0.823	698	690.5	705.5
	0.824	695	690.5	704
	0.825	697	687	702
	0.826	694	694	698.5
	0.827	699.5	694	702
	0.828	699	692.5	701.5
	0.829	697.5	692	706
	0.83	698	690.5	701.5
	0.831	695	691	703.5
	0.832	695	694.5	704.5
	0.833	697.5	694.5	702.5
	0.834	697.5	693	703.5
	0.835	695	694	702
	0.836	700	694.5	701.5
	0.837	695	695	702.5
	0.838	697.5	695	704.5
	0.839	695	695	704
	0.84	698.5	695	702.5
	0.841	698.5	695	706.5
	0.842	695	695	704.5
	0.843	695	695	704.5
	0.844	697.5	699.5	702.5
	0.845	698.5	699.5	706
	0.846	697.5	695	708
	0.847	697.5	698.5	705.5
	0.848	700.5	698.5	704
	0.849	695	698.5	705.5
	0.85	695	700.5	705
	0.851	695	695	707
	0.852	699	697.5	708
	0.853	698.5	702.5	703.5
	0.854	697.5	702	705.5
	0.855	700	698.5	707.5
	0.856	700.5	698.5	708
	0.857	694	703	709
	0.858	698.5	704	704.5
	0.859	697.5	703	707.5
	0.86	698.5	701.5	708
	0.861	697.5	703.5	707
	0.862	700.5	703	706
	0.863	695	703.5	706.5
	0.864	697.5	704	707
	0.865	700	701.5	708
	0.866	695	704.5	708
	0.867	702	702.5	707
	0.868	695	705.5	709.5
	0.869	697.5	704.5	707.5
	0.87	698.5	702.5	711
	0.871	697.5	707	705.5
	0.872	699.5	701	708
	0.873	697.5	704.5	710
	0.874	698	699.5	706.5
	0.875	700.5	701.5	707
	0.876	695	704	705
	0.877	698.5	705.5	707
	0.878	698	701.5	708
	0.879	702	703.5	709
	0.88	698	700.5	707.5
	0.881	699	702.5	707.5
	0.882	701	700	707.5
	0.883	699.5	700.5	707
	0.884	701.5	700	707
	0.885	695	697.5	708.5
	0.886	702.5	701	709.5
	0.887	697.5	701.5	707
	0.888	699.5	700	707.5
	0.889	699	697.5	709.5
	0.89	701.5	701.5	705
	0.891	699	699	706.5
	0.892	701.5	701	710
	0.893	698.5	698.5	706
	0.894	704.5	695	704.5
	0.895	695	695	706
	0.896	704.5	693	710
	0.897	700	695	704.5
	0.898	700.5	695	708
	0.899	701	695	707.5
	0.9	698.5	695	707
	0.901	699.5	694	704
	0.902	701	694.5	707.5
	0.903	703.5	693	707
	0.904	702.5	693	707
	0.905	703.5	691.5	704.5
	0.906	697.5	690.5	704.5
	0.907	700	690.5	705.5
	0.908	698.5	692.5	704.5
	0.909	700.5	689	704.5
	0.91	703.5	692.5	706
	0.911	700.5	692	702.5
	0.912	701	690.5	702
	0.913	704	689.5	703.5
	0.914	700	689	704
	0.915	702.5	689.5	703.5
	0.916	704	691.5	704.5
	0.917	698	691	701
	0.918	704	690.5	703.5
	0.919	699.5	691	702
	0.92	703	689.5	702.5
	0.921	702.5	687.5	702.5
	0.922	700.5	690.5	703
	0.923	701.5	691	700.5
	0.924	704.5	686	701
	0.925	700	686.5	701.5
	0.926	701	688.5	702
	0.927	702.5	689	701
	0.928	702.5	684.5	700
	0.929	702.5	692.5	697.5
	0.93	704.5	686	703.5
	0.931	702.5	688.5	700.5
	0.932	703.5	687.5	698
	0.933	702	689	700.5
	0.934	704.5	691	698.5
	0.935	704.5	689	699.5
	0.936	699.5	688.5	698.5
	0.937	698	688	699
	0.938	704.5	686.5	697.5
	0.939	701	690	700
	0.94	700	690	695
	0.941	700.5	691	697.5
	0.942	695	690.5	695
	0.943	704	690.5	700
	0.944	702.5	691	698
	0.945	704.5	690.5	697.5
	0.946	699	689	699
	0.947	703	689.5	695
	0.948	702.5	691	701.5
	0.949	703.5	688.5	699
	0.95	700	690	699
	0.951	703.5	688.5	699
	0.952	702.5	691	695
	0.953	699.5	692	695
	0.954	700.5	690.5	695
	0.955	702.5	697.5	695
	0.956	695	689.5	700.5
	0.957	702.5	692.5	699
	0.958	702	691.5	702
	0.959	700.5	690.5	698.5
	0.96	700.5	692.5	698
	0.961	699	693	697.5
	0.962	697.5	694	697.5
	0.963	699.5	693	699.5
	0.964	702	693	698
	0.965	695	695	700.5
	0.966	699	694	699
	0.967	698	693.5	699
	0.968	695	695	701
	0.969	700	695	697.5
	0.97	701	695	700.5
	0.971	698	695	695
	0.972	698.5	695	701.5
	0.973	695	699.5	698.5
	0.974	695	693.5	698
	0.975	699	697.5	701.5
	0.976	699.5	697.5	701
	0.977	698.5	694.5	698
	0.978	700	697.5	698
	0.979	699.5	695	695
	0.98	699	695	697.5
	0.981	695	699	700
	0.982	699	700.5	697.5
	0.983	697.5	697.5	699.5
	0.984	697.5	701.5	699
	0.985	694.5	700	698.5
	0.986	698.5	702	699
	0.987	695	697.5	698
	0.988	697	698	697.5
	0.989	695	704	701
	0.99	698.5	702.5	698.5
	0.991	695	699	701
	0.992	695	703.5	697.5
	0.993	695	702	699
	0.994	693	702	699.5
	0.995	695	704.5	698
	0.996	695	701	695
	0.997	694.5	699.5	701.5
	0.998	695	702.5	698
	0.999	695	700.5	695
	1	695	703.5	700.5
	1.001	693	703	698.5
	1.002	697.5	702.5	702.5
	1.003	694	705	701
	1.004	695	703.5	700.5
	1.005	692	701.5	698
	1.006	694	703.5	704.5
	1.007	694.5	703	700
	1.008	693	704	701
	1.009	693.5	703.5	697.5
	1.01	695	705.5	702.5
	1.011	695	700.5	698.5
	1.012	695	702.5	702.5
	1.013	695	702	698
	1.014	692	703	703
	1.015	698	707	699.5
	1.016	695	704.5	701
	1.017	693.5	699	701
	1.018	694	699.5	700.5
	1.019	694.5	702	694
	1.02	694.5	702.5	697.5
	1.021	693	695	699
	1.022	695	702	701
	1.023	695	699.5	702.5
	1.024	695	697	698.5
	1.025	695	701.5	702
	1.026	693	697.5	699.5
	1.027	695	703.5	698.5
	1.028	691.5	701.5	700.5
	1.029	692.5	698.5	701
	1.03	697.5	697.5	699
	1.031	695	695	695
	1.032	693.5	695	695
	1.033	695	697.5	699.5
	1.034	695	695	698
	1.035	694.5	697.5	697.5
	1.036	694.5	697.5	702
	1.037	695	695	700.5
	1.038	695	700	700
	1.039	695	697.5	695
	1.04	697.5	697.5	698.5
	1.041	694.5	695	695
	1.042	695	698.5	695
	1.043	692.5	695	695
	1.044	695	694	695
	1.045	695	695	697.5
	1.046	698.5	697.5	699.5
	1.047	698.5	695	695
	1.048	697	695	699
	1.049	695	695	699.5
	1.05	698.5	697.5	700
	1.051	699	698.5	695
	1.052	700	694.5	695
	1.053	695	695	698.5
	1.054	695	693.5	697.5
	1.055	693.5	695	694
	1.056	695	692	697
	1.057	695	695	697.5
	1.058	695	692	695
	1.059	694	693	695
	1.06	694.5	693.5	695
	1.061	695	693	700.5
	1.062	695	695	699.5
	1.063	695	697.5	697.5
	1.064	697.5	695	698.5
	1.065	695	695	695
	1.066	698	695	697.5
	1.067	698	695	695
	1.068	695	697.5	698.5
	1.069	695	697.5	695
	1.07	697.5	695	695
	1.071	698	697.5	701.5
	1.072	699.5	695	698.5
	1.073	697.5	694.5	703.5
	1.074	695	695	697.5
	1.075	695	697.5	698.5
	1.076	695	698	698
	1.077	700.5	698	699.5
	1.078	702	697	702.5
	1.079	695	695	700
	1.08	698.5	699.5	700
	1.081	694	695	702
	1.082	697.5	698	700
	1.083	695	695	702.5
	1.084	695	695	702.5
	1.085	697.5	700.5	701.5
	1.086	698.5	695	698.5
	1.087	699	697.5	702
	1.088	699	698	698
	1.089	698.5	701	705
	1.09	695	697.5	705.5
	1.091	700	695	698
	1.092	699	698	701.5
	1.093	699.5	701	700
	1.094	698	701.5	701.5
	1.095	701	700	703
	1.096	702	702	706
	1.097	700.5	702.5	705.5
	1.098	701	705	702.5
	1.099	697.5	701	705
	1.1	697.5	702	701.5
	1.101	702.5	703.5	701
	1.102	704	702.5	700
	1.103	702	703	702
	1.104	700.5	703.5	704.5
	1.105	700.5	703	703
	1.106	703.5	703	703
	1.107	702	702.5	703
	1.108	701	705.5	702.5
	1.109	702	706.5	703
	1.11	701	704.5	704.5
	1.111	699	702.5	701
	1.112	702	703.5	702.5
	1.113	695	702.5	703.5
	1.114	703	704.5	704
	1.115	700	705	701
	1.116	699	708.5	703
	1.117	700.5	710	702.5
	1.118	699	707	707
	1.119	700.5	707	704.5
	1.12	698	708.5	700.5
	1.121	703	707.5	704
	1.122	703.5	709	703
	1.123	700.5	707.5	701
	1.124	702	708.5	702
	1.125	702.5	707	702.5
	1.126	701	712.5	706
	1.127	701.5	712	703.5
	1.128	701.5	710	698.5
	1.129	704	708.5	701.5
	1.13	699	714	702.5
	1.131	700.5	714	702
	1.132	702	714.5	702.5
	1.133	701	714.5	705
	1.134	703.5	712	704
	1.135	699.5	713	703.5
	1.136	701	718	704.5
	1.137	702	714.5	702.5
	1.138	699	713.5	702.5
	1.139	698.5	715.5	702
	1.14	701	715	703
	1.141	699	719.5	702.5
	1.142	698.5	717.5	705.5
	1.143	703.5	718	703.5
	1.144	699	718	702
	1.145	700.5	717	701
	1.146	702	718.5	702.5
	1.147	700.5	714.5	702.5
	1.148	701.5	718.5	703.5
	1.149	699	717.5	705
	1.15	702.5	717.5	704
	1.151	702	721.5	703.5
	1.152	695	716.5	703
	1.153	699.5	718	704.5
	1.154	702.5	717.5	703.5
	1.155	697.5	717	703
	1.156	701.5	720.5	704.5
	1.157	698	719	703.5
	1.158	702.5	717	702.5
	1.159	700.5	719	703
	1.16	700	717.5	706
	1.161	698	718	701
	1.162	702.5	719.5	702
	1.163	699.5	717.5	705
	1.164	702	719.5	704
	1.165	700	716	704
	1.166	701	715.5	705
	1.167	698.5	717.5	704.5
	1.168	697.5	718	705.5
	1.169	703	718	704.5
	1.17	698.5	718	705.5
	1.171	697.5	717	704.5
	1.172	700	718	705.5
	1.173	700.5	714	704.5
	1.174	701	716	706
	1.175	701	715.5	703.5
	1.176	704	718	704.5
	1.177	701.5	715	706.5
	1.178	701.5	717.5	704.5
	1.179	701.5	718	704
	1.18	700.5	713.5	702.5
	1.181	700	710	705.5
	1.182	700.5	711	706
	1.183	695	716	706
	1.184	699.5	712	707
	1.185	699	709.5	708
	1.186	702.5	711.5	703.5
	1.187	699	713.5	705.5
	1.188	700.5	713.5	704
	1.189	700.5	713	706.5
	1.19	699.5	714.5	705.5
	1.191	699	709.5	705
	1.192	698	710	704
	1.193	697.5	710	704.5
	1.194	698	710	701.5
	1.195	700.5	710	702.5
	1.196	697.5	710	704.5
	1.197	698.5	713.5	704
	1.198	698	710	705.5
	1.199	699	709.5	704.5
	1.2	700.5	710	700
	1.201	699	707	704.5
	1.202	697.5	710	701.5
	1.203	703.5	708.5	703.5
	1.204	698.5	707.5	704
	1.205	699	705.5	701.5
	1.206	698	708.5	701.5
	1.207	700	711	698
	1.208	701.5	710	703
	1.209	695	710	702
	1.21	695	706.5	705
	1.211	697.5	706.5	702.5
	1.212	701.5	707	698.5
	1.213	701.5	705.5	700.5
	1.214	702	705.5	698
	1.215	699	704.5	701.5
	1.216	697.5	706	701
	1.217	695	704.5	698.5
	1.218	697.5	704	702
	1.219	695	699	700
	1.22	702	705.5	703.5
	1.221	699	704.5	703.5
	1.222	698	703.5	698
	1.223	695	702	697.5
	1.224	697.5	700.5	699
	1.225	698.5	702.5	699.5
	1.226	698.5	697.5	698
	1.227	695	697.5	699
	1.228	699	701.5	700.5
	1.229	698	700.5	699.5
	1.23	699.5	698	699.5
	1.231	695	698	698
	1.232	697	698.5	698
	1.233	700	697.5	697.5
	1.234	697.5	699.5	701
	1.235	694	698.5	699
	1.236	695	699.5	700
	1.237	695	699.5	699
	1.238	697.5	694.5	698
	1.239	693	695	698
	1.24	695	694	694.5
	1.241	695	694.5	698.5
	1.242	700.5	694.5	695
	1.243	698	697.5	698
	1.244	698	693	695
	1.245	697.5	693	695
	1.246	695	698	698.5
	1.247	695	694.5	700.5
	1.248	698.5	695	700
	1.249	697.5	697	694.5
	1.25	698.5	694.5	695
	1.251	695	695	695
	1.252	695	697.5	702
	1.253	695	693.5	699
	1.254	698	695	698.5
	1.255	695	695	695
	1.256	698	697.5	698
	1.257	697.5	693.5	695
	1.258	695	691	699
	1.259	695	695	701
	1.26	695	695	700.5
	1.261	695	695	695
	1.262	695	699	695
	1.263	695	698.5	698.5
	1.264	697	695	694.5
	1.265	698	694.5	699
	1.266	695	697.5	697
	1.267	695	694.5	695
	1.268	698	695	695
	1.269	694	695	695
	1.27	695	697.5	695
	1.271	695	699	698.5
	1.272	698.5	695	695
	1.273	695	695	701
	1.274	699.5	697	698.5
	1.275	700	695	700
	1.276	701.5	695	695
	1.277	698.5	695	695
	1.278	695	695	695
	1.279	697.5	700.5	694.5
	1.28	701	699.5	695
	1.281	698.5	699	700.5
	1.282	697.5	698.5	697.5
	1.283	698	699.5	698.5
	1.284	701	699.5	698.5
	1.285	703	695	698.5
	1.286	700.5	695	697.5
	1.287	699.5	700.5	695
	1.288	700.5	698.5	699
	1.289	701.5	698.5	697.5
	1.29	700.5	697.5	697.5
	1.291	699.5	704	701
	1.292	701.5	702.5	697.5
	1.293	700.5	697.5	695
	1.294	702.5	695	703
	1.295	700.5	700.5	700.5
	1.296	703.5	701.5	700
	1.297	698.5	700.5	695
	1.298	700	701	698.5
	1.299	702	700.5	698.5
	1.3	704.5	695	695
	1.301	700.5	698	701.5
	1.302	700	698	697.5
	1.303	701.5	699	697.5
	1.304	702.5	698	698
	1.305	704	697.5	695
	1.306	702	695	698
	1.307	705	700	702.5
	1.308	703.5	695	698.5
	1.309	698.5	700	697.5
	1.31	698	700	695
	1.311	702.5	695	699
	1.312	700.5	697.5	700
	1.313	703.5	698.5	695
	1.314	701	698.5	701
	1.315	699.5	695	695
	1.316	702	695	699.5
	1.317	699	698.5	698.5
	1.318	700	694	698.5
	1.319	698.5	695	695
	1.32	700	697.5	702.5
	1.321	699.5	695	697.5
	1.322	701	695	700
	1.323	700.5	697.5	695
	1.324	699.5	695	699.5
	1.325	702	697.5	698.5
	1.326	698.5	695	698
	1.327	705	697	698.5
	1.328	702.5	699	698
	1.329	697.5	699	695
	1.33	700.5	697.5	699.5
	1.331	697.5	695	695
	1.332	700.5	695	695
	1.333	703	695	695
	1.334	703.5	695	699
	1.335	697.5	695	700.5
	1.336	700	697.5	695
	1.337	700	695	698.5
	1.338	698.5	695	695
	1.339	701	697.5	698
	1.34	703	701	698
	1.341	701.5	697.5	695
	1.342	700.5	698	697.5
	1.343	697.5	700.5	699.5
	1.344	700	701	698
	1.345	700	699	701
	1.346	699	698	695
	1.347	702	699.5	695
	1.348	695	700.5	695
	1.349	695	698.5	695
	1.35	700.5	697.5	695
	1.351	698.5	698.5	698
	1.352	699	695	695
	1.353	700.5	695	697
	1.354	699.5	697.5	699.5
	1.355	703	698.5	700
	1.356	695	702	701
	1.357	695	699.5	698
	1.358	699	695	695
	1.359	699	701.5	699
	1.36	695	699	698.5
	1.361	697.5	699	701.5
	1.362	695	698.5	699.5
	1.363	698	697.5	698.5
	1.364	698.5	702.5	699.5
	1.365	697.5	699	695
	1.366	695	700	701.5
	1.367	697.5	702.5	701
	1.368	695	700.5	698
	1.369	698.5	699	703.5
	1.37	702	699.5	697.5
	1.371	698.5	702.5	701.5
	1.372	697.5	702	702
	1.373	693.5	699.5	703
	1.374	695	698	702
	1.375	695	700.5	698
	1.376	694.5	704	702.5
	1.377	695	702.5	704
	1.378	695	700.5	705
	1.379	692.5	701	706
	1.38	695	702	709
	1.381	695	702	704.5
	1.382	699.5	698	702.5
	1.383	702.5	700.5	707.5
	1.384	691	701.5	706
	1.385	695	702.5	704.5
	1.386	692.5	701	707.5
	1.387	695	701.5	704.5
	1.388	695	701.5	704.5
	1.389	693.5	702.5	705.5
	1.39	690.5	703.5	707
	1.391	695	703.5	710
	1.392	695	702.5	701.5
	1.393	695	699.5	708
	1.394	692.5	701	705.5
	1.395	695	704.5	708.5
	1.396	692	702.5	706
	1.397	693.5	704	708
	1.398	695	700	708.5
	1.399	697	695	704.5
	1.4	694.5	703.5	707.5
	1.401	693.5	702.5	708.5
	1.402	695	703.5	707.5
	1.403	694	701	704
	1.404	692.5	698	708.5
	1.405	695	702.5	707.5
	1.406	695	695	708
	1.407	694.5	701	706.5
	1.408	693.5	700	703.5
	1.409	698.5	702	704
	1.41	695	701.5	704
	1.411	695	702.5	705
	1.412	695	701	704.5
	1.413	694.5	701.5	705
	1.414	697.5	707.5	700.5
	1.415	690.5	700.5	702.5
	1.416	699	700.5	701.5
	1.417	695	700.5	700.5
	1.418	698.5	695	702
	1.419	695	698	702
	1.42	697	697.5	704.5
	1.421	698.5	700.5	703.5
	1.422	695	698	703.5
	1.423	700.5	697.5	701
	1.424	695	695	699
	1.425	700	695	704
	1.426	695	697.5	698.5
	1.427	695	702	701
	1.428	697.5	700	700.5
	1.429	699.5	698.5	700
	1.43	698.5	699	700.5
	1.431	698	699.5	698.5
	1.432	695	699	698.5
	1.433	695	699	702
	1.434	697.5	695	699.5
	1.435	698	695	695
	1.436	699	699	695
	1.437	699.5	697.5	699
	1.438	699	701	697.5
	1.439	701.5	698	698
	1.44	700.5	695	695
	1.441	700	695	695
	1.442	702.5	695	698.5
	1.443	699	694.5	693
	1.444	698.5	697.5	697.5
	1.445	699	695	695
	1.446	698	697.5	698
	1.447	698.5	695	699.5
	1.448	698.5	693.5	695
	1.449	701.5	699	695
	1.45	700.5	695	695
	1.451	700.5	695	698
	1.452	700.5	691.5	695
	1.453	700.5	690.5	699.5
	1.454	700.5	695	698.5
	1.455	699	695	695
	1.456	700.5	700	698
	1.457	698	695	697.5
	1.458	700	693	695
	1.459	702.5	695	697.5
	1.46	699	690.5	697.5
	1.461	698.5	695	698
	1.462	700	693.5	700.5
	1.463	699	697.5	695
	1.464	700.5	694.5	697.5
	1.465	699.5	695	699.5
	1.466	700.5	694	698.5
	1.467	698	695	700.5
	1.468	699	697.5	695
	1.469	695	693.5	698.5
	1.47	700.5	698.5	701.5
	1.471	695	697.5	701
	1.472	695	695	697.5
	1.473	697.5	695	700
	1.474	697.5	695	700.5
	1.475	698.5	698	695
	1.476	700.5	695	699.5
	1.477	697.5	701	699
	1.478	695	695	697.5
	1.479	702	697.5	700.5
	1.48	699.5	695	699.5
	1.481	695	699	698
	1.482	697	697.5	700.5
	1.483	701	698	700
	1.484	697.5	698	699.5
	1.485	700	700.5	703.5
	1.486	695	701	697.5
	1.487	695	699.5	703
	1.488	700.5	703.5	704
	1.489	695	701.5	695
	1.49	698	699.5	699
	1.491	698	703.5	702
	1.492	697.5	698	698.5
	1.493	698.5	699.5	705
	1.494	698	701	700.5
	1.495	695	702.5	698.5
	1.496	697.5	704.5	697.5
	1.497	697.5	704.5	695
	1.498	697.5	701.5	700.5
	1.499	695	704	701
	1.5	694.5	706.5	698.5
	1.501	698.5	704.5	702
	1.502	699.5	706.5	700
	1.503	695	704.5	699
	1.504	698.5	707	698
	1.505	695	706	697.5
	1.506	701	705	701.5
	1.507	697.5	708.5	697.5
	1.508	695	706	699.5
	1.509	695	708	695
	1.51	695	706	695
	1.511	698.5	712	695
	1.512	700	708	695
	1.513	695	709.5	694
	1.514	697.5	707.5	695
	1.515	699.5	708.5	695
	1.516	702.5	710	694.5
	1.517	695	706	694
	1.518	699.5	708.5	694
	1.519	695	710	695
	1.52	699	709.5	695
	1.521	699.5	707.5	692.5
	1.522	702.5	710	694.5
	1.523	698	709.5	695
	1.524	699	710	692.5
	1.525	699	710	695
	1.526	700.5	713.5	693
	1.527	700	710	694.5
	1.528	702	715	691.5
	1.529	697.5	712	693
	1.53	700.5	710	690
	1.531	698.5	711	690
	1.532	701	714	692
	1.533	698.5	714	689
	1.534	699	709.5	690.5
	1.535	700	714.5	692.5
	1.536	699.5	715.5	690
	1.537	697	715	693
	1.538	695	713.5	688.5
	1.539	700	715.5	685
	1.54	698.5	714	689
	1.541	697.5	717.5	690.5
	1.542	698	711.5	688.5
	1.543	700	717.5	690.5
	1.544	699	715.5	688.5
	1.545	702	717	687
	1.546	699	714	693
	1.547	702	715.5	690
	1.548	695	716.5	687
	1.549	701.5	717.5	689.5
	1.55	700.5	717	685.5
	1.551	704	714.5	689
	1.552	700	711.5	689
	1.553	699.5	717	690.5
	1.554	699	711.5	686.5
	1.555	699	715	686.5
	1.556	701.5	714.5	688
	1.557	699.5	714.5	688
	1.558	701	714.5	689.5
	1.559	700.5	716.5	686.5
	1.56	700	715	685.5
	1.561	700.5	715	690.5
	1.562	704.5	713.5	686.5
	1.563	695	713	690
	1.564	703.5	711	688
	1.565	700	716.5	689
	1.566	702.5	715	690.5
	1.567	698.5	715	687.5
	1.568	699.5	715	690
	1.569	701.5	715.5	688
	1.57	699.5	712.5	690.5
	1.571	701	713	685.5
	1.572	698.5	707.5	690.5
	1.573	698.5	714	689
	1.574	699.5	710	690.5
	1.575	701	709.5	686
	1.576	702.5	713.5	689
	1.577	698	713.5	688.5
	1.578	699.5	708.5	690
	1.579	701.5	709.5	690.5
	1.58	697.5	710	686
	1.581	698.5	710	689.5
	1.582	697.5	710	685.5
	1.583	700	710	690.5
	1.584	695	711	686
	1.585	698.5	709.5	689.5
	1.586	697.5	710	689.5
	1.587	698	706	690.5
	1.588	700	704	689
	1.589	698.5	704	691.5
	1.59	698	705.5	687
	1.591	699	709	689.5
	1.592	695	707	689.5
	1.593	697.5	705	692.5
	1.594	698	709	693.5
	1.595	698	708	692.5
	1.596	702	705	690.5
	1.597	695	704	693
	1.598	702.5	704.5	693.5
	1.599	698	704	690.5
	1.6	699.5	707.5	692.5
	1.601	700.5	700.5	695
	1.602	698.5	705.5	695
	1.603	700.5	705.5	695
	1.604	697.5	705	694.5
	1.605	697.5	705.5	695
	1.606	700.5	704.5	697.5
	1.607	699.5	700	695
	1.608	700	701.5	695
	1.609	698	704.5	702
	1.61	695	704.5	701
	1.611	699	702.5	701.5
	1.612	700	705.5	695
	1.613	698	704	702
	1.614	698.5	702.5	700
	1.615	702.5	702.5	704
	1.616	698.5	704	701.5
	1.617	695	704.5	702.5
	1.618	701	704	704
	1.619	698.5	703.5	705
	1.62	700.5	702	703.5
	1.621	701.5	705.5	704.5
	1.622	697.5	702.5	704
	1.623	697.5	700.5	706
	1.624	697.5	702	706.5
	1.625	697.5	699	708.5
	1.626	695	702.5	708.5
	1.627	697.5	702.5	707
	1.628	695	701	706.5
	1.629	695	702.5	709.5
	1.63	700.5	702	710
	1.631	697.5	704.5	712.5
	1.632	697.5	700.5	713.5
	1.633	699.5	697.5	713.5
	1.634	697.5	699.5	711.5
	1.635	702	699	707
	1.636	701	700	709.5
	1.637	697.5	700	713.5
	1.638	700.5	701	708.5
	1.639	700.5	698	713
	1.64	700	698	710
	1.641	695	701	714
	1.642	704	700	713
	1.643	698	698.5	715.5
	1.644	697.5	699.5	715
	1.645	699	695	710
	1.646	699.5	695	716
	1.647	701.5	694.5	713.5
	1.648	700.5	695	713.5
	1.649	702.5	695	717
	1.65	701	695	715
	1.651	702	695	713.5
	1.652	700.5	695	714.5
	1.653	704.5	695	712.5
	1.654	701	695	716
	1.655	700.5	694.5	714.5
	1.656	702.5	695	717
	1.657	704.5	695	715
	1.658	701.5	693.5	715
	1.659	704	697.5	715.5
	1.66	702.5	695	716
	1.661	705	695	715
	1.662	705	695	717.5
	1.663	704.5	700	713.5
	1.664	707	697	715
	1.665	706	695	715
	1.666	705	695	716
	1.667	707	698.5	717.5
	1.668	704	698.5	714
	1.669	703	695	711.5
	1.67	703.5	697.5	716
	1.671	702.5	695	712.5
	1.672	703.5	695	714
	1.673	703.5	699.5	712.5
	1.674	707.5	695	712.5
	1.675	705.5	695	714
	1.676	704.5	695	711.5
	1.677	706.5	698	711.5
	1.678	708	698.5	710
	1.679	705	698.5	714
	1.68	706	695	712.5
	1.681	706.5	694	709
	1.682	705	698.5	710
	1.683	707.5	700.5	711.5
	1.684	703.5	699.5	705.5
	1.685	709	698	712.5
	1.686	704.5	698.5	709
	1.687	704.5	700.5	709.5
	1.688	704.5	699.5	710
	1.689	706.5	697.5	709
	1.69	704	703	710
	1.691	703.5	700.5	709.5
	1.692	706	704.5	709
	1.693	701.5	702.5	706
	1.694	704	698.5	704.5
	1.695	707	702	705.5
	1.696	704.5	702.5	706
	1.697	704	701.5	708
	1.698	704.5	701.5	704.5
	1.699	702.5	700.5	705
	1.7	705	701.5	704.5
	1.701	704.5	702.5	702.5
	1.702	708	698	705
	1.703	704.5	700.5	704
	1.704	707	702.5	705
	1.705	704.5	698.5	701
	1.706	705	700	702.5
	1.707	703	702	703
	1.708	704.5	704.5	703.5
	1.709	705	702.5	703.5
	1.71	704	704	700.5
	1.711	707	697.5	702.5
	1.712	703	702.5	700
	1.713	704	701	704.5
	1.714	705.5	704	701.5
	1.715	708.5	701.5	699
	1.716	708.5	698	698.5
	1.717	702	703.5	700
	1.718	706	702	701
	1.719	705	703	699.5
	1.72	706	704	698.5
	1.721	708.5	699.5	701
	1.722	708.5	705	698.5
	1.723	703	701	701
	1.724	707.5	701.5	698
	1.725	706	704	703.5
	1.726	705	702	699
	1.727	706.5	703	701
	1.728	704.5	703.5	697.5
	1.729	705.5	703.5	701
	1.73	708	705	700.5
	1.731	704	707	699.5
	1.732	707.5	704.5	700
	1.733	707.5	704.5	700
	1.734	704.5	706	700
	1.735	710	706	701
	1.736	704	710	699
	1.737	710	706.5	698.5
	1.738	706	707	703.5
	1.739	706	708	701
	1.74	708.5	709	695
	1.741	708	709	702.5
	1.742	705.5	706	701.5
	1.743	706.5	712	703.5
	1.744	705.5	707	699.5
	1.745	706.5	710	698
	1.746	707	710	699.5
	1.747	707	710	704
	1.748	705	714	701.5
	1.749	708	711	704.5
	1.75	704	712.5	703.5
	1.751	705	710	700.5
	1.752	705.5	716.5	704
	1.753	704	714	701
	1.754	703	714	700
	1.755	704.5	715	704
	1.756	701.5	713.5	701
	1.757	704.5	712.5	697.5
	1.758	705.5	714	701.5
	1.759	700	718.5	698
	1.76	702	714.5	702.5
	1.761	702	717.5	700
	1.762	701.5	717.5	699
	1.763	705	715.5	704.5
	1.764	700	717.5	699
	1.765	702	718	704
	1.766	704	717.5	701.5
	1.767	702.5	717	704
	1.768	701.5	717	702.5
	1.769	704	718.5	702
	1.77	702.5	718.5	702
	1.771	703	719	705.5
	1.772	701	715	700.5
	1.773	700.5	720	704.5
	1.774	701.5	717	704.5
	1.775	700	712.5	702.5
	1.776	701	714	704
	1.777	704	715.5	704
	1.778	702	711	702.5
	1.779	701.5	711.5	702.5
	1.78	703.5	711	704
	1.781	701	709.5	706
	1.782	700	708	704.5
	1.783	697.5	708.5	702
	1.784	698.5	704.5	704
	1.785	701	702	704
	1.786	700	702.5	707.5
	1.787	701.5	698	703
	1.788	695	700.5	704
	1.789	700	695	703.5
	1.79	695	691.5	704
	1.791	697.5	691.5	702
	1.792	698	693	707
	1.793	700.5	687	705
	1.794	700.5	684.5	704
	1.795	699	682.5	704.5
	1.796	697.5	680	701.5
	1.797	699.5	675.5	702
	1.798	695	678.5	703
	1.799	697.5	670.5	705
	1.8	700	670	700
	1.801	697.5	670	705.5
	1.802	699	665	705
	1.803	698.5	660.5	702.5
	1.804	697.5	660	707
	1.805	698	656.5	704.5
	1.806	697.5	653.5	706
	1.807	697.5	650	704.5
	1.808	695	646.5	706.5
	1.809	695	644	706
	1.81	699	643	704.5
	1.811	698	642.5	708
	1.812	699.5	639	707.5
	1.813	695	635	708.5
	1.814	695	634	709.5
	1.815	697.5	628	710
	1.816	694	628.5	709.5
	1.817	700	624.5	707
	1.818	695	620	710
	1.819	697.5	619.5	713
	1.82	697.5	616	713.5
	1.821	694.5	616.5	709
	1.822	695	610.5	708.5
	1.823	697.5	607	710
	1.824	692	605.5	713.5
	1.825	695	602	709
	1.826	695	601.5	711
	1.827	695	599.5	709.5
	1.828	698.5	595.5	710
	1.829	693	596.5	710
	1.83	695	594	710
	1.831	695	590.5	710
	1.832	695	589	707.5
	1.833	695	584	710
	1.834	694.5	581	707.5
	1.835	695	581	708.5
	1.836	695	580.5	710
	1.837	695	578.5	711
	1.838	698	575.5	710
	1.839	696.5	574.5	709.5
	1.84	691	573.5	708.5
	1.841	694	572.5	710
	1.842	691.5	570.5	707
	1.843	697.5	570.5	707.5
	1.844	695	565.5	708
	1.845	692.5	564.5	709
	1.846	694.5	560	707.5
	1.847	695	559.5	703
	1.848	694.5	557	704
	1.849	694.5	559	703.5
	1.85	695	554.5	705.5
	1.851	695	557	703.5
	1.852	693	552.5	704.5
	1.853	695	549.5	698
	1.854	697.5	551	702.5
	1.855	694	546	695
	1.856	697.5	547.5	695
	1.857	699	544.5	699.5
	1.858	695	542.5	695
	1.859	697.5	542.5	697
	1.86	693	538.5	694
	1.861	697.5	538	695
	1.862	695	533	694
	1.863	695	532.5	693
	1.864	697.5	530.5	692.5
	1.865	697.5	527	693
	1.866	695	528	692
	1.867	695	524.5	690.5
	1.868	695	525	694.5
	1.869	695	520	686.5
	1.87	695	517.5	690.5
	1.871	695	515	686.5
	1.872	691.5	514	684.5
	1.873	695	509	688.5
	1.874	695	506	689
	1.875	695	505.5	686.5
	1.876	695	505	685
	1.877	690.5	501	686.5
	1.878	695	493.5	682
	1.879	693	492.5	685
	1.88	693	492.5	685.5
	1.881	690	485.5	686.5
	1.882	690	483.5	683.5
	1.883	691	475	682
	1.884	693	476.5	682.5
	1.885	690.5	470.5	682.5
	1.886	690.5	471	681
	1.887	689	465.5	680
	1.888	686.5	463	684
	1.889	684.5	458	680
	1.89	686.5	451	677
	1.891	687	448	677.5
	1.892	681.5	445.5	678.5
	1.893	682	437	677.5
	1.894	680	437.5	678
	1.895	681.5	430.5	679
	1.896	679.5	425.5	680
	1.897	677.5	421.5	676
	1.898	677	415	677
	1.899	677	411.5	677
	1.9	674.5	404	674
	1.901	676.5	402.5	674.5
	1.902	676.5	397.5	674
	1.903	674.5	394	670.5
	1.904	670.5	384.5	672
	1.905	670	383	668.5
	1.906	671	380	668
	1.907	665	372.5	670
	1.908	664	367	665
	1.909	665	363.5	665
	1.91	664	358	665
	1.911	663.5	355	663.5
	1.912	663.5	348	663.5
	1.913	660.5	341.5	659
	1.914	659	340	654
	1.915	657.5	338	655.5
	1.916	653	330	654
	1.917	656	324.5	653
	1.918	650	320	650
	1.919	651	321.5	643
	1.92	651.5	314	646
	1.921	645.5	309.5	641.5
	1.922	646.5	304.5	639
	1.923	643.5	297.5	635
	1.924	643	295.5	627.5
	1.925	638	294.5	625.5
	1.926	632.5	289.5	626.5
	1.927	638.5	284.5	618.5
	1.928	635.5	280	616.5
	1.929	633.5	272.5	616
	1.93	629	270	607
	1.931	629	268	607.5
	1.932	625	263	599
	1.933	624	258.5	595
	1.934	624	255.5	590.5
	1.935	619	251.5	583
	1.936	618.5	250	581
	1.937	615.5	246	572.5
	1.938	612	243	571
	1.939	613	240.5	564.5
	1.94	611	237.5	562
	1.941	606.5	229.5	554
	1.942	602	228.5	547
	1.943	597.5	225.5	546
	1.944	600.5	223	536
	1.945	595.5	225.5	535.5
	1.946	593	218	531
	1.947	589.5	216.5	522.5
	1.948	589.5	214	522
	1.949	586.5	211.5	512.5
	1.95	581	213	506
	1.951	580	212.5	505
	1.952	575.5	209.5	497.5
	1.953	573	208.5	495.5
	1.954	570.5	204.5	491.5
	1.955	567.5	205	484
	1.956	562.5	204.5	474.5
	1.957	559.5	201	476
	1.958	560.5	202	468
	1.959	555	201	463
	1.96	547.5	205.5	454
	1.961	547.5	203	446
	1.962	546	204.5	445
	1.963	541	204	439
	1.964	540	205	430.5
	1.965	530.5	203	431.5
	1.966	531	207	422
	1.967	522.5	211	417.5
	1.968	522.5	213.5	409
	1.969	520	212	403
	1.97	516	217.5	396.5
	1.971	510.5	217.5	392
	1.972	507.5	222.5	385.5
	1.973	504.5	225	378
	1.974	500	225	371
	1.975	496	230	366
	1.976	491	232	358
	1.977	490.5	238.5	348
	1.978	484.5	241	345
	1.979	480.5	242.5	333
	1.98	478	246.5	328
	1.981	471.5	251	323.5
	1.982	465	253.5	316
	1.983	462.5	262.5	309.5
	1.984	458.5	266	300.5
	1.985	453	271.5	293.5
	1.986	446.5	271.5	287
	1.987	446.5	277	279
	1.988	443.5	283.5	272
	1.989	435.5	283.5	264.5
	1.99	429	290.5	257
	1.991	423.5	293.5	251
	1.992	417	295	246.5
	1.993	414.5	303	235
[truncated: 6,006 more rows]

## Sheet: C
DataTypeVer2.0	Time	Fz	Fz	Fz
NumberOfData		15000	15000	15000
PreTriggerData		0	0	0
SamplingTime[ms]		1	1	1
DataLabel		AD1:CMJ	AD2:CMJ	AD4:CMJ
DataUnit	sec	N	N	N
	0	694	698	697
	0.001	697.5	698	693
	0.002	697.5	697.5	698.5
	0.003	696	697.5	701
	0.004	696	692	697.5
	0.005	698.5	696	699.5
	0.006	697	695.5	694
	0.007	698	697.5	697.5
	0.008	696	695	698
	0.009	698.5	695	698.5
	0.01	704.5	695	698.5
	0.011	697.5	695	698.5
	0.012	700.5	694.5	696
	0.013	700.5	696	700.5
	0.014	697.5	698.5	695.5
	0.015	695	692	699.5
	0.016	696	694.5	698
	0.017	695	696	695
	0.018	699.5	696	698.5
	0.019	696	692.5	697.5
	0.02	696	695	699
	0.021	698.5	694.5	697.5
	0.022	696	696	699.5
	0.023	695	695	696
	0.024	697.5	692	700
	0.025	697.5	692	697.5
	0.026	697.5	692.5	696
	0.027	696	692	698.5
	0.028	696	691	697.5
	0.029	694	690	696
	0.03	695	692.5	696
	0.031	693	690.5	699.5
	0.032	696	692.5	696
	0.033	698	690	700.5
	0.034	698.5	690.5	697.5
	0.035	695	691.5	698
	0.036	695	692	695.5
	0.037	698	689.5	699
	0.038	695	690	698
	0.039	695	693.5	699.5
	0.04	695.5	690.5	696
	0.041	697.5	691	697.5
	0.042	696	685.5	694.5
	0.043	694	689.5	697.5
	0.044	697.5	690	696
	0.045	698	690.5	696
	0.046	695	686.5	694
	0.047	697.5	692.5	696
	0.048	696	688.5	694.5
	0.049	694.5	687.5	696
	0.05	697.5	690.5	697
	0.051	696	689.5	694
	0.052	696	688	695.5
	0.053	697.5	688.5	694.5
	0.054	696	687	693.5
	0.055	697.5	688.5	697
	0.056	698	687	693.5
	0.057	695.5	688	696
	0.058	701	687.5	695
	0.059	697.5	687	692
	0.06	696	687.5	694.5
	0.061	698	686	696
	0.062	696	689	693.5
	0.063	695.5	688.5	695.5
	0.064	697.5	690.5	694.5
	0.065	700.5	685.5	697
	0.066	701	684.5	693
	0.067	696	690.5	690.5
	0.068	700.5	685.5	691.5
	0.069	700	686	690.5
	0.07	697.5	687	692
	0.071	697.5	689	693.5
	0.072	698.5	686.5	692
	0.073	697.5	689.5	692.5
	0.074	697.5	687.5	694.5
	0.075	696	688	690.5
	0.076	696	685.5	694.5
	0.077	697.5	685	691.5
	0.078	695.5	690	691
	0.079	696	685.5	691.5
	0.08	699.5	687.5	690.5
	0.081	697.5	688	695
	0.082	695	689	688.5
	0.083	698.5	691.5	690.5
	0.084	699.5	691.5	693
	0.085	696	690	692
	0.086	696	692	694
	0.087	696	690.5	691
	0.088	697.5	690.5	691.5
	0.089	700	689	694
	0.09	696	689.5	691.5
	0.091	696	690	692
	0.092	698	690.5	695
	0.093	696.5	690.5	693
	0.094	694.5	690.5	691
	0.095	694	689.5	694.5
	0.096	697.5	691.5	689
	0.097	696	690.5	689
	0.098	695	692	694.5
	0.099	694	689.5	692
	0.1	693.5	695	690
	0.101	694	689.5	694
	0.102	694	690.5	692.5
	0.103	697.5	688.5	692
	0.104	696	688	689.5
	0.105	695	693	693
	0.106	694.5	690	691
	0.107	696	693	690.5
	0.108	696	687.5	692
	0.109	692.5	690	694.5
	0.11	693	693	693
	0.111	698	691.5	694.5
	0.112	694.5	691	692
	0.113	693	695	695.5
	0.114	693.5	695.5	692.5
	0.115	695	696	691
	0.116	695	692.5	690.5
	0.117	691.5	694	691
	0.118	693.5	692.5	693.5
	0.119	695	694.5	692.5
	0.12	692.5	693	690.5
	0.121	695.5	691	689
	0.122	692	697.5	689.5
	0.123	693.5	694	691.5
	0.124	694	691.5	689.5
	0.125	696	694.5	692
	0.126	695.5	695	693
	0.127	697.5	696	694
	0.128	694.5	696	693
	0.129	693.5	697.5	691.5
	0.13	690.5	692.5	692
	0.131	693.5	694.5	690.5
	0.132	695	696	690
	0.133	693.5	692	691.5
	0.134	695	692	690.5
	0.135	691.5	692.5	689
	0.136	696	698.5	687.5
	0.137	692	697.5	690.5
	0.138	696	697.5	694.5
	0.139	692	698	690.5
	0.14	694	695	691.5
	0.141	693.5	693.5	693
	0.142	697.5	694.5	693
	0.143	694.5	697.5	691
	0.144	693.5	701.5	690.5
	0.145	695	695.5	691
	0.146	696	696	691.5
	0.147	694	699.5	690
	0.148	693	700	690.5
	0.149	696	697.5	691
	0.15	694	696	688.5
	0.151	693	697.5	694
	0.152	695.5	695	690.5
	0.153	698	700.5	693
	0.154	695	700	692
	0.155	697	696	695.5
	0.156	694	698.5	689.5
	0.157	694	696	689
	0.158	692	699	693.5
	0.159	694.5	696	693
	0.16	694.5	696	694
	0.161	693.5	698.5	694
	0.162	695.5	699	692
	0.163	696	699.5	691
	0.164	698	697	695.5
	0.165	695.5	698.5	693
	0.166	693	699	693.5
	0.167	695.5	698	696
	0.168	694.5	702.5	692.5
	0.169	696	701.5	695.5
	0.17	694	696	692.5
	0.171	689.5	696	693.5
	0.172	696	698.5	696
	0.173	696	697.5	693
	0.174	695.5	699.5	697
	0.175	694.5	700	694.5
	0.176	695.5	697.5	695
	0.177	693.5	698	694
	0.178	692	697.5	696
	0.179	696	696	696
	0.18	700.5	700	694.5
	0.181	694.5	696	697
	0.182	693	697	694
	0.183	695.5	697	695
	0.184	696	695.5	695
	0.185	696	696	694.5
	0.186	696	697.5	695
	0.187	695.5	696	694
	0.188	698	696	696
	0.189	696	697.5	691
	0.19	696	696	695.5
	0.191	696	693.5	694.5
	0.192	695	696	696
	0.193	699	695	697.5
	0.194	696	694.5	696
	0.195	697.5	697.5	700.5
	0.196	693.5	697	695
	0.197	697.5	696	696
	0.198	692.5	692.5	696
	0.199	693.5	692.5	698
	0.2	697	690.5	700.5
	0.201	697.5	695	697.5
	0.202	699	692	696.5
	0.203	696	693	697.5
	0.204	697.5	696	700
	0.205	695	695.5	699.5
	0.206	696	695.5	699.5
	0.207	697	696	702
	0.208	697.5	692.5	698
	0.209	692	695	696
	0.21	696	695.5	697.5
	0.211	694.5	692.5	698
	0.212	696	694.5	703
	0.213	698	695	701
	0.214	696	693.5	700.5
	0.215	694.5	690	697.5
	0.216	696	693.5	702
	0.217	694	694.5	700
	0.218	696	696	698.5
	0.219	696	694	701.5
	0.22	694	693	698
	0.221	696	692	698
	0.222	695.5	691	700
	0.223	696	692	698.5
	0.224	696	694	702.5
	0.225	693.5	693.5	701
	0.226	697	693.5	701.5
	0.227	698	693	699
	0.228	692	693	700
	0.229	697	692.5	698.5
	0.23	697.5	694.5	703.5
	0.231	695	693.5	698.5
	0.232	694	691	699
	0.233	694.5	692	702.5
	0.234	697.5	693	701.5
	0.235	691	693.5	702
	0.236	693.5	692	700.5
	0.237	699.5	694	700.5
	0.238	695	690.5	700.5
	0.239	693	693.5	703
	0.24	697.5	692.5	700
	0.241	694	693.5	701
	0.242	696	691	700
	0.243	696	694	700.5
	0.244	694	692	699
	0.245	693.5	695	699
	0.246	696	692	698
	0.247	696	693.5	697.5
	0.248	695.5	692.5	700.5
	0.249	694.5	691.5	698.5
	0.25	696.5	694	697
	0.251	693.5	691	699.5
	0.252	696	695.5	698.5
	0.253	695	694	698
	0.254	696	693.5	699
	0.255	695.5	692	697.5
	0.256	696	695	697.5
	0.257	697	695.5	699
	0.258	695.5	694	699.5
	0.259	697.5	690.5	693
	0.26	696	697	697.5
	0.261	695	694.5	698
	0.262	695.5	692.5	699
	0.263	695	692	697
	0.264	696	694	701
	0.265	696	692.5	696
	0.266	695.5	692	697
	0.267	697	692.5	699
	0.268	693	694	698.5
	0.269	696	695.5	698.5
	0.27	695	694.5	696
	0.271	698.5	696	698.5
	0.272	696	691	696
	0.273	696	696	696
	0.274	695	694.5	696
	0.275	697.5	696	697.5
	0.276	697.5	691	695.5
	0.277	696	693	697.5
	0.278	695.5	698	695.5
	0.279	697.5	695.5	698
	0.28	696	692	697.5
	0.281	694.5	696	698.5
	0.282	693	696	694.5
	0.283	698.5	695.5	694
	0.284	697.5	697.5	697
	0.285	696	693	698.5
	0.286	695	697.5	697.5
	0.287	695	696	694
	0.288	696	692.5	697.5
	0.289	695	691	699.5
	0.29	696	695.5	699
	0.291	696	692.5	696
	0.292	694	691.5	699
	0.293	700	692	695
	0.294	696	695.5	699
	0.295	694.5	694.5	697.5
	0.296	696	693	697.5
	0.297	697.5	693.5	696
	0.298	697.5	695	696
	0.299	696.5	693	699
	0.3	697.5	693	697.5
	0.301	696	694.5	697.5
	0.302	695.5	690.5	698
	0.303	695	691	699.5
	0.304	697	690.5	697.5
	0.305	696	692.5	699.5
	0.306	695	690	700
	0.307	694.5	690.5	699.5
	0.308	696	692.5	696
	0.309	696	691	696
	0.31	696	693	698.5
	0.311	697.5	694.5	698
	0.312	696	692	699
	0.313	695	689.5	698.5
	0.314	694.5	689.5	696
	0.315	696	691.5	700.5
	0.316	695.5	689	699.5
	0.317	692.5	690.5	699
	0.318	696	692	698.5
	0.319	695.5	689	696
	0.32	696	691	698.5
	0.321	692.5	687.5	700
	0.322	696	689	699
	0.323	696	689	700
	0.324	696	691.5	702
	0.325	696	690	696
	0.326	697	689.5	700.5
	0.327	697	693	699
	0.328	695.5	689	700
	0.329	697.5	690.5	698.5
	0.33	695.5	689	701.5
	0.331	697.5	690.5	699
	0.332	697.5	688	697.5
	0.333	692	688.5	700
	0.334	697.5	692	696
	0.335	692	690	696
	0.336	696	690.5	698.5
	0.337	698.5	690.5	696
	0.338	696	686	701.5
	0.339	696	690	697
	0.34	699	693	698.5
	0.341	697.5	688	702
	0.342	695.5	690	698.5
	0.343	698.5	688.5	700.5
	0.344	697	688	699
	0.345	699.5	689.5	699.5
	0.346	695.5	684.5	700
	0.347	696	691	700.5
	0.348	696	688	701
	0.349	695	689.5	698
	0.35	696	686.5	702.5
	0.351	692.5	687.5	698.5
	0.352	693	688.5	697.5
	0.353	695	687	699
	0.354	695.5	686.5	700.5
	0.355	693.5	687	703.5
	0.356	695.5	690	700
	0.357	694	689	702.5
	0.358	695.5	690	700
	0.359	695.5	688.5	700.5
	0.36	692	688	704.5
	0.361	694	689.5	698.5
	0.362	692.5	692	701
	0.363	696	689.5	702
	0.364	693.5	688	701.5
	0.365	694.5	687	699.5
	0.366	694	688	698.5
	0.367	693	688.5	704.5
	0.368	691.5	688	699
	0.369	693.5	688.5	698.5
	0.37	688	688.5	697.5
	0.371	694	690	698
	0.372	694.5	686.5	699.5
	0.373	692.5	689.5	699.5
	0.374	690.5	686.5	704
	0.375	694	688	702
	0.376	696	685	701.5
	0.377	691	685	696
	0.378	693.5	686	700.5
	0.379	693.5	689	700
	0.38	692	689.5	700.5
	0.381	692	690.5	699
	0.382	694	687	698.5
	0.383	691.5	685	698.5
	0.384	692	688	699
	0.385	691	690.5	699.5
	0.386	693	689.5	698.5
	0.387	691	687	697.5
	0.388	689.5	685.5	699.5
	0.389	691	687.5	701
	0.39	691.5	687.5	699.5
	0.391	693	686	698.5
	0.392	693	685.5	700.5
	0.393	693.5	688	700.5
	0.394	692	689	698.5
	0.395	693.5	688	699
	0.396	691	690	697.5
	0.397	691	687.5	694
	0.398	689.5	690.5	700.5
	0.399	690.5	688.5	697.5
	0.4	690	688.5	696
	0.401	690.5	690	696
	0.402	689.5	689.5	698
	0.403	686	690.5	698.5
	0.404	691	691	696
	0.405	690	689	697.5
	0.406	687.5	691	695.5
	0.407	689.5	691.5	696
	0.408	690	687.5	697
	0.409	688.5	689.5	697.5
	0.41	692	690.5	697.5
	0.411	687.5	688	692
	0.412	688.5	694	692.5
	0.413	689.5	689.5	696
	0.414	687.5	686	696
	0.415	688	690	693.5
	0.416	687.5	689.5	693.5
	0.417	685	694.5	694
	0.418	688	694.5	695.5
	0.419	690	693.5	696
	0.42	686.5	692	692.5
	0.421	687.5	693.5	696
	0.422	690.5	693	691.5
	0.423	690.5	696	696
	0.424	691	697	695
	0.425	689	697	695.5
	0.426	686.5	693	696
	0.427	690.5	696	697.5
	0.428	688.5	695	698
	0.429	689	695	696
	0.43	689.5	698	695.5
	0.431	686.5	698.5	693
	0.432	690	696	696
	0.433	689.5	697.5	695
	0.434	689.5	696	694.5
	0.435	685.5	699.5	696
	0.436	689	696	695
	0.437	689.5	696	693
	0.438	689	696	695
	0.439	688.5	697.5	696
	0.44	686.5	697.5	693.5
	0.441	690.5	700	693
	0.442	688	699.5	695
	0.443	690	701	694.5
	0.444	688.5	698	693
	0.445	688	700	696
	0.446	686.5	698.5	694.5
	0.447	686.5	704.5	694.5
	0.448	687	702.5	690.5
	0.449	689.5	702	693
	0.45	691	702	694.5
	0.451	687.5	705	694
	0.452	690.5	701	694
	0.453	690	704.5	694.5
	0.454	690.5	703.5	692
	0.455	693.5	704.5	693
	0.456	692	702.5	693.5
	0.457	692	707.5	692
	0.458	690	704.5	692.5
	0.459	691	706	694
	0.46	691.5	705	697
	0.461	688.5	706	694
	0.462	689	705	689.5
	0.463	693.5	707	694.5
	0.464	690	706	696
	0.465	694	705	694.5
	0.466	694	703.5	700
	0.467	695	704.5	689.5
	0.468	695	705	693
	0.469	693	708	695
	0.47	694.5	705	690.5
	0.471	693.5	704.5	695
	0.472	695.5	704.5	697
	0.473	692.5	707	690.5
	0.474	695	703	691.5
	0.475	697.5	704	693
	0.476	692.5	703.5	692.5
	0.477	696	706	695
	0.478	697.5	705	694
	0.479	698.5	705	693.5
	0.48	695	704.5	692.5
	0.481	697.5	704.5	693
	0.482	698.5	703.5	696
	0.483	699.5	704.5	697.5
	0.484	699	707	691.5
	0.485	697.5	703.5	695.5
	0.486	697.5	702	697.5
	0.487	695	704.5	695.5
	0.488	699.5	703	692.5
	0.489	695.5	703.5	694.5
	0.49	699.5	704	695
	0.491	698.5	702	693.5
	0.492	699	701	693.5
	0.493	697.5	702.5	693.5
	0.494	701.5	701.5	691
	0.495	699	700	692
	0.496	703	697.5	689.5
	0.497	698.5	696	693
	0.498	700	699.5	691.5
	0.499	699.5	699	693.5
	0.5	699.5	698	693
	0.501	702.5	705.5	696
	0.502	700	696	692.5
	0.503	703.5	699.5	696
	0.504	700	699.5	691
	0.505	701	697.5	693
	0.506	696	700	691.5
	0.507	701	695.5	693.5
	0.508	701.5	697.5	689
	0.509	703.5	693	688.5
	0.51	696.5	693.5	690
	0.511	697.5	697.5	693
	0.512	698.5	692.5	695
	0.513	699.5	694.5	690
	0.514	699	693	690.5
	0.515	698	695.5	688
	0.516	699.5	691.5	690
	0.517	699	693.5	691.5
	0.518	700.5	695	690.5
	0.519	700.5	694	690.5
	0.52	699.5	696	690
	0.521	698.5	693.5	691.5
	0.522	696	691.5	690.5
	0.523	700.5	691	693
	0.524	699	692.5	690
	0.525	693.5	689	690
	0.526	696	695	688.5
	0.527	697.5	693	688.5
	0.528	701	693	689
	0.529	699.5	694	690.5
	0.53	698.5	691.5	692
	0.531	698	691	691.5
	0.532	698.5	692	690.5
	0.533	695.5	689.5	689.5
	0.534	696	691.5	689
	0.535	697.5	692.5	689
	0.536	697	692.5	690.5
	0.537	695.5	694	690.5
	0.538	696	693.5	688
	0.539	697.5	692.5	689.5
	0.54	695	693.5	690.5
	0.541	696	693	691.5
	0.542	694.5	693	688.5
	0.543	695	691.5	690.5
	0.544	696	692.5	690.5
	0.545	695	693	691.5
	0.546	696	691	690
	0.547	694	694	685
	0.548	695	695.5	690.5
	0.549	696	694.5	687
	0.55	692.5	691.5	686.5
	0.551	694	693	688
	0.552	694.5	693	688.5
	0.553	696	695.5	688
	0.554	693.5	696	690.5
	0.555	696	693.5	684
	0.556	697.5	694	687
	0.557	699	695	686
	0.558	695.5	693	688
	0.559	697.5	691.5	688.5
	0.56	696	693.5	688.5
	0.561	695	691	688.5
	0.562	696	691	689.5
	0.563	696	697	688.5
	0.564	697.5	695	687
	0.565	694.5	696	687
	0.566	697.5	693.5	684.5
	0.567	696	696	689.5
	0.568	697	695	689
	0.569	697	693.5	687.5
	0.57	699	699	688
	0.571	697.5	693	687
	0.572	698	698	689
	0.573	693.5	692.5	687
	0.574	695	695.5	690
	0.575	699	692.5	686.5
	0.576	698.5	694	688
	0.577	700.5	694	690
	0.578	698	692	689
	0.579	698.5	695	688.5
	0.58	697	693.5	687.5
	0.581	701	693	689
	0.582	699.5	695	688.5
	0.583	700	692	686.5
	0.584	697.5	691.5	689.5
	0.585	699.5	696	687.5
	0.586	699.5	695	687.5
	0.587	697.5	693.5	687.5
	0.588	703	699	688.5
	0.589	700.5	695	689
	0.59	698	693.5	689.5
	0.591	700.5	694.5	693
	0.592	703.5	696	688.5
	0.593	696	694.5	692
	0.594	704.5	696	693.5
	0.595	700.5	695.5	690.5
	0.596	699	694.5	692.5
	0.597	699	698.5	691
	0.598	697.5	697.5	691
	0.599	699.5	695	692.5
	0.6	698	696	690
	0.601	700.5	694.5	690.5
	0.602	702.5	694.5	694.5
	0.603	698	696	688.5
	0.604	703	696	690.5
	0.605	698	698.5	690.5
	0.606	697.5	697.5	693.5
	0.607	696	697	692
	0.608	697.5	695	691
	0.609	701	696	692.5
	0.61	699.5	699.5	689.5
	0.611	702.5	694.5	687
	0.612	697.5	696	692
	0.613	698.5	693.5	694.5
	0.614	698.5	699	695
	0.615	695	699	694
	0.616	696	693	690.5
	0.617	697.5	695	690.5
	0.618	696	696	694.5
	0.619	699	693	692
	0.62	699.5	696	692
	0.621	700.5	697	694
	0.622	698	701.5	693.5
	0.623	698	695.5	694.5
	0.624	696	695.5	696
	0.625	698.5	694.5	695
	0.626	697.5	697	693.5
	0.627	700	695.5	691
	0.628	701	695.5	695
	0.629	697	698.5	696
	0.63	696	694	692
	0.631	699.5	698.5	691.5
	0.632	697.5	695.5	694
	0.633	696.5	695	694
	0.634	696	698.5	691.5
	0.635	698.5	695.5	691
	0.636	700	696	692.5
	0.637	696	698.5	691
	0.638	694.5	698	692.5
	0.639	697	696	694.5
	0.64	697	695.5	696
	0.641	697.5	695.5	691
	0.642	697.5	696	693.5
	0.643	698	700	690.5
	0.644	696	695.5	694
	0.645	698	698.5	697.5
	0.646	697.5	695	692.5
	0.647	693.5	696	695
	0.648	696	696	691.5
	0.649	697	693.5	694
	0.65	696	694.5	691.5
	0.651	696	695.5	695
	0.652	696	696	690.5
	0.653	693.5	694.5	693.5
	0.654	695	692	695
	0.655	696	694.5	696
	0.656	694.5	694.5	693.5
	0.657	695.5	697.5	693.5
	0.658	696	697.5	695.5
	0.659	697.5	695	696
	0.66	697.5	695	693.5
	0.661	694	697.5	694
	0.662	698.5	695	690
	0.663	695	693	693.5
	0.664	696	697.5	691.5
	0.665	694.5	695	695
	0.666	694	699.5	696
	0.667	697	695.5	692
	0.668	695	692.5	691.5
	0.669	697.5	695	695.5
	0.67	697.5	695	693.5
	0.671	696	697.5	693.5
	0.672	696	697.5	694.5
	0.673	696	695	691.5
	0.674	695	692	692.5
	0.675	695	693	691.5
	0.676	698.5	695	693.5
	0.677	697	697.5	693
	0.678	694	696	695
	0.679	696	694	693
	0.68	697	693	693
	0.681	695	693	696
	0.682	696	695.5	692.5
	0.683	696	696	693.5
	0.684	696	696	695
	0.685	696	697	694.5
	0.686	699	694	697.5
	0.687	698	694.5	697
	0.688	698.5	693	696
	0.689	694.5	694.5	692
	0.69	695.5	692	695
	0.691	697.5	696	692
	0.692	694	696	696
	0.693	697.5	697	696
	0.694	694	696	696
	0.695	698	695	692.5
	0.696	694	695.5	695
	0.697	695	695.5	693.5
	0.698	698	695.5	694.5
	0.699	697.5	696	694
	0.7	697.5	697.5	696
	0.701	696	694	694.5
	0.702	698	695	694.5
	0.703	696	696	692.5
	0.704	698.5	697.5	694.5
	0.705	696	696	693.5
	0.706	695	695	698
	0.707	696	695	696
	0.708	697.5	695.5	697.5
	0.709	699	694	699
	0.71	696	697.5	694.5
	0.711	699.5	694.5	695
	0.712	698.5	696	694.5
	0.713	696	695.5	694
	0.714	697	694.5	690.5
	0.715	695.5	698	697.5
	0.716	699	696	695
	0.717	694.5	697.5	692
	0.718	696	696	693.5
	0.719	699	694.5	693.5
	0.72	698	695.5	694.5
	0.721	697.5	693	692
	0.722	700	694.5	695
	0.723	699.5	696	692
	0.724	697.5	693	693.5
	0.725	699.5	695	690.5
	0.726	700	695.5	691
	0.727	693.5	697.5	692
	0.728	699.5	696	691
	0.729	699.5	695	694.5
	0.73	698	698	692.5
	0.731	698.5	696	692.5
	0.732	696	693	690
	0.733	699	695.5	690.5
	0.734	699.5	695.5	692.5
	0.735	699.5	695.5	692.5
	0.736	700	693.5	694
	0.737	696	693.5	688.5
	0.738	698	695	690
	0.739	697	696	692
	0.74	698	694	689.5
	0.741	697.5	695	691
	0.742	696	694.5	688.5
	0.743	697	696	690
	0.744	698.5	693	694.5
	0.745	699.5	696	690.5
	0.746	701	694.5	690.5
	0.747	697.5	693.5	690.5
	0.748	699	695	688.5
	0.749	699.5	695	691
	0.75	699	696	689
	0.751	698	693	685.5
	0.752	696	693	687
	0.753	696	697	688.5
	0.754	700	697.5	691
	0.755	696	696	687
	0.756	701.5	695.5	691.5
	0.757	700.5	694	687.5
	0.758	700	696	688.5
	0.759	695	695	689
	0.76	700	694.5	688.5
	0.761	697.5	698	687.5
	0.762	700	695.5	691
	0.763	699.5	692.5	689.5
	0.764	697.5	690.5	687
	0.765	701	695.5	689
	0.766	701	697	686
	0.767	701.5	695	689.5
	0.768	701	693.5	687.5
	0.769	702	695	690.5
	0.77	701.5	694	688
	0.771	702	696	695.5
	0.772	703	692.5	689
	0.773	697.5	693	688.5
	0.774	699.5	696	691.5
	0.775	698.5	693.5	689.5
	0.776	700	696	689.5
	0.777	700.5	696	692.5
	0.778	702	692.5	688.5
	0.779	702.5	695	689.5
	0.78	703.5	693	691.5
	0.781	703	694.5	689.5
	0.782	707	693	692
	0.783	702.5	693.5	692.5
	0.784	700.5	694	692
	0.785	703	694.5	691.5
	0.786	703.5	690.5	693.5
	0.787	698.5	693	690.5
	0.788	704.5	694	692
	0.789	700.5	695	693.5
	0.79	703	691.5	691
	0.791	699.5	692.5	691
	0.792	704	694	694
	0.793	701.5	694.5	693.5
	0.794	703.5	696	693.5
	0.795	700.5	695	692
	0.796	701	696	694
	0.797	701.5	697.5	693
	0.798	700	698.5	693
	0.799	700	697	697.5
	0.8	700	694.5	693
	0.801	697.5	699	694
	0.802	696	694	694.5
	0.803	698.5	694	693.5
	0.804	699	694	694
	0.805	695.5	696	691.5
	0.806	694.5	695	692.5
	0.807	698	695.5	694.5
	0.808	698.5	694.5	692
	0.809	695	696	692.5
	0.81	697.5	694	695.5
	0.811	697.5	696	694
	0.812	696	694	691
	0.813	696	694.5	695
	0.814	698	697.5	694
	0.815	696	695	696
	0.816	694.5	697	694
	0.817	693	692	696
	0.818	695.5	697.5	693
	0.819	694	694.5	697
	0.82	695	694	691.5
	0.821	693.5	693.5	695
	0.822	691	696	693
	0.823	690.5	695	692.5
	0.824	692.5	692	695.5
	0.825	693	695	695.5
	0.826	694	696	693
	0.827	692	698	693
	0.828	691	694.5	695.5
	0.829	689.5	695	696
	0.83	690.5	695	692
	0.831	692	697.5	690
	0.832	693.5	697	696
	0.833	689.5	695.5	695.5
	0.834	688	696	693
	0.835	690.5	695.5	694.5
	0.836	687.5	695.5	695.5
	0.837	686.5	693.5	693.5
	0.838	689.5	694.5	691
	0.839	691.5	696	694.5
	0.84	686.5	694.5	694.5
	0.841	689.5	696	695.5
	0.842	688	695	697.5
	0.843	691	695	696
	0.844	690.5	693	692.5
	0.845	688.5	695	694.5
	0.846	685	696	695.5
	0.847	687.5	694.5	694
	0.848	689	696.5	694
	0.849	688	695.5	695
	0.85	685.5	693	696
	0.851	683	696	696
	0.852	684	697	700
	0.853	686	694	692.5
	0.854	685.5	695	696
	0.855	686	694.5	699
	0.856	684	697.5	694.5
	0.857	688	694	696
	0.858	681	693.5	696
	0.859	684	693.5	699.5
	0.86	686	697.5	699
	0.861	684.5	694	697.5
	0.862	681	690.5	696
	0.863	684.5	698	698.5
	0.864	686.5	693	699
	0.865	686.5	695	697.5
	0.866	684	694	699.5
	0.867	683	693	700
	0.868	684	692	698.5
	0.869	685.5	693	702
	0.87	685.5	696	703
	0.871	687	691.5	699.5
	0.872	686.5	694	697.5
	0.873	684.5	691.5	701.5
	0.874	686.5	691	700.5
	0.875	686	692.5	700.5
	0.876	688.5	696	700
	0.877	684.5	694	703
	0.878	686	694	699.5
	0.879	687	692	702
	0.88	684	690.5	701.5
	0.881	687	693.5	703
	0.882	685.5	693	697.5
	0.883	685	694	703.5
	0.884	688.5	692	702.5
	0.885	687	695	703.5
	0.886	687	693.5	704.5
	0.887	686	692	701.5
	0.888	686	690	701.5
	0.889	684.5	693.5	701
	0.89	687.5	693	701
	0.891	688.5	691	703
	0.892	685	688.5	704.5
	0.893	687	690.5	698.5
	0.894	687	692.5	701
	0.895	690	690.5	701.5
	0.896	688.5	691	699.5
	0.897	689.5	692.5	700.5
	0.898	687.5	692	700.5
	0.899	687	691	701.5
	0.9	690.5	692	700.5
	0.901	687	690.5	702.5
	0.902	688.5	691.5	698.5
	0.903	688.5	692	700.5
	0.904	690.5	694.5	700
	0.905	693	687.5	700
	0.906	693	696	701.5
	0.907	688.5	692	698
	0.908	690.5	693	703
	0.909	693.5	693.5	704.5
	0.91	691	693.5	699.5
	0.911	690	692	699
	0.912	691	693.5	703
	0.913	690.5	692.5	700.5
	0.914	694	693	699
	0.915	694	691.5	700.5
	0.916	693.5	693	700
	0.917	695	694	699.5
	0.918	693	694	698.5
	0.919	690.5	692	699
	0.92	692	691.5	700.5
	0.921	694.5	693	697.5
	0.922	695	692	700.5
	0.923	692	690.5	699.5
	0.924	692	690	698
	0.925	696	692	697.5
	0.926	695	690.5	703
	0.927	697	692	698
	0.928	694.5	693.5	697.5
	0.929	695	694	698.5
	0.93	696	690.5	697.5
	0.931	697	690.5	702.5
	0.932	698	692.5	697.5
	0.933	695.5	691.5	700.5
	0.934	698	691	699.5
	0.935	697.5	692.5	699.5
	0.936	699	689.5	697.5
	0.937	698	693	695
	0.938	697	687.5	698
	0.939	696	690.5	699.5
	0.94	696	691	698.5
	0.941	697	692	696
	0.942	700	690.5	696
	0.943	698	692.5	695
	0.944	701.5	690.5	696
	0.945	698.5	689.5	698.5
	0.946	699.5	688	694
	0.947	696.5	692.5	699
	0.948	697.5	688	696
	0.949	700	692.5	697
	0.95	699	688	694.5
	0.951	699	688.5	697.5
	0.952	699.5	689	693.5
	0.953	698.5	688	694
	0.954	697	689	693.5
	0.955	697.5	689.5	694
	0.956	700.5	687.5	693
	0.957	703	688.5	695
	0.958	699	690	695.5
	0.959	697.5	689.5	694.5
	0.96	698.5	688.5	697.5
	0.961	701	685	693
	0.962	697.5	687.5	694
	0.963	696	688	695
	0.964	698.5	688	690.5
	0.965	700	689	693.5
	0.966	699	691.5	695.5
	0.967	699.5	687.5	693.5
	0.968	698.5	687.5	695
	0.969	701.5	690	692
	0.97	700	687.5	694
	0.971	699	686	694
	0.972	702.5	688	693
	0.973	701	687	690.5
	0.974	700.5	689	694.5
	0.975	700	684.5	695.5
	0.976	698.5	689.5	690.5
	0.977	698.5	687.5	693.5
	0.978	700	684	695
	0.979	698	687	695.5
	0.98	699	690.5	694.5
	0.981	702.5	688.5	693
	0.982	698.5	688.5	693.5
	0.983	697.5	689.5	690.5
	0.984	699	685.5	692.5
	0.985	696	690.5	691
	0.986	696	688	692
	0.987	697.5	691	692
	0.988	698.5	689	695.5
	0.989	695	692	693
	0.99	695.5	692.5	695
	0.991	697	689.5	692
	0.992	697.5	690	695.5
	0.993	698.5	690.5	694
	0.994	692.5	694	692
	0.995	698.5	690.5	690.5
	0.996	701	690	694
	0.997	698.5	693.5	693.5
	0.998	697.5	690.5	689.5
	0.999	698	690.5	690
	1	694.5	690.5	692
	1.001	696	692	694.5
	1.002	692	691	691.5
	1.003	696	691.5	690
	1.004	691	695.5	690.5
	1.005	696	692.5	689.5
	1.006	692	696	688.5
	1.007	696	696	691
	1.008	695.5	694.5	689.5
	1.009	694	695	692
	1.01	691.5	693.5	689.5
	1.011	691	694.5	690.5
	1.012	696	696	689.5
	1.013	692.5	696	688.5
	1.014	694.5	695.5	690
	1.015	697.5	697.5	689.5
	1.016	693.5	695.5	690.5
	1.017	692	696	688
	1.018	690	694	688.5
	1.019	690.5	695.5	690.5
	1.02	694	697.5	687.5
	1.021	691.5	700.5	688
	1.022	691	697.5	690
	1.023	690	699.5	694.5
	1.024	689.5	694.5	693
	1.025	693.5	698	686
	1.026	690.5	700	688.5
	1.027	690.5	698.5	690.5
	1.028	690.5	697	687
	1.029	690.5	699.5	690.5
	1.03	688.5	698.5	689
	1.031	690.5	695.5	690.5
	1.032	693	696	689.5
	1.033	691	698.5	689.5
	1.034	690.5	701.5	689.5
	1.035	691	701.5	693
	1.036	693	701.5	690
	1.037	690.5	697.5	688.5
	1.038	688.5	701	688.5
	1.039	689	698	686.5
	1.04	689	698.5	688.5
	1.041	690	700	690.5
	1.042	693.5	698	691
	1.043	689.5	697.5	687
	1.044	688.5	699.5	690.5
	1.045	690	700.5	688.5
	1.046	690.5	696.5	692
	1.047	690.5	698.5	691
	1.048	690.5	696	687.5
	1.049	688	698.5	693
	1.05	687	698	689.5
	1.051	688.5	697.5	690.5
	1.052	691	697.5	692
	1.053	690.5	697.5	694
	1.054	688.5	699	690.5
	1.055	691	696	692
	1.056	690	698.5	693
	1.057	687.5	699	690.5
	1.058	690.5	697.5	692
	1.059	689	695.5	690.5
	1.06	690	694.5	688.5
	1.061	689.5	696	690.5
	1.062	690.5	698.5	690.5
	1.063	690.5	696	693
	1.064	691.5	697.5	692.5
	1.065	691.5	699.5	696
	1.066	686.5	697.5	696
	1.067	689.5	695	696
	1.068	690.5	696	692
	1.069	690.5	699	696
	1.07	694	694	694.5
	1.071	688.5	697	694.5
	1.072	689.5	695.5	696
	1.073	689	693.5	692
	1.074	692	694.5	699.5
	1.075	694	694	695.5
	1.076	686.5	694.5	696
	1.077	690	692	696
	1.078	691.5	696	695
	1.079	689.5	695.5	696
	1.08	690.5	695	694
	1.081	690.5	694.5	696
	1.082	690.5	694.5	699.5
	1.083	690.5	695	697.5
	1.084	691.5	691	698.5
	1.085	693	695	700
	1.086	688.5	695	696
	1.087	690	694	701.5
	1.088	690.5	697.5	698.5
	1.089	690	694.5	695.5
	1.09	690	694.5	701
	1.091	688.5	694	697.5
	1.092	690.5	694	696
	1.093	689	696	698
	1.094	688.5	696	698.5
	1.095	688.5	692.5	701
	1.096	689.5	691.5	703
	1.097	692.5	690.5	701.5
	1.098	691	693.5	700
	1.099	690	693	699
	1.1	692	694	699
	1.101	692.5	696	701.5
	1.102	686.5	698	700
	1.103	692	695.5	699
	1.104	692.5	694.5	701.5
	1.105	690.5	692	698
	1.106	690	692.5	700.5
	1.107	693.5	695.5	703
	1.108	693.5	695	699.5
	1.109	690.5	692.5	702.5
	1.11	693.5	695.5	701.5
	1.111	693	694.5	701.5
	1.112	690.5	693	700.5
	1.113	692.5	692.5	699.5
	1.114	694.5	693	700.5
	1.115	690.5	694	699.5
	1.116	690.5	697.5	697.5
	1.117	692	695	700
	1.118	691.5	695.5	700
	1.119	693	696	697.5
	1.12	691	694.5	699.5
	1.121	691	697.5	703
	1.122	688.5	695.5	702
	1.123	690	692	699.5
	1.124	693.5	695.5	701
	1.125	694	693.5	697
	1.126	694	697.5	700.5
	1.127	692	696	699.5
	1.128	693	699	700.5
	1.129	696	696	702
	1.13	692	694	697.5
	1.131	691.5	695.5	699
	1.132	693	698	699.5
	1.133	692.5	695.5	702.5
	1.134	693	697.5	697.5
	1.135	692	696	700.5
	1.136	696	698.5	702
	1.137	694	696	698
	1.138	694	698	699
	1.139	693.5	701.5	699
	1.14	695	697	699
	1.141	693.5	697.5	701.5
	1.142	695.5	699.5	703
	1.143	693.5	696	699.5
	1.144	696	699	700
	1.145	694	698	699
	1.146	695.5	700	696
	1.147	693.5	696	701.5
	1.148	694	699.5	699
	1.149	695	699	697
	1.15	693.5	697	698
	1.151	696	698	700
	1.152	695	700.5	698.5
	1.153	696	702.5	700
	1.154	694	700.5	702
	1.155	696	702.5	700.5
	1.156	695	698.5	702
	1.157	694.5	702.5	697.5
	1.158	694	703	697.5
	1.159	695.5	702	703.5
	1.16	696	698.5	699
	1.161	697.5	697	703.5
	1.162	696	704	700.5
	1.163	695	704.5	698.5
	1.164	695.5	704.5	697.5
	1.165	696	703	697
	1.166	695.5	700.5	701
	1.167	697.5	700.5	699
	1.168	692	701.5	697.5
	1.169	696	704.5	698
	1.17	695	703.5	699
	1.171	699	699.5	698.5
	1.172	695.5	703.5	699
	1.173	695.5	703	693.5
	1.174	698.5	703.5	697
	1.175	695	706	699
	1.176	695.5	702.5	701.5
	1.177	699	702	697.5
	1.178	694.5	702.5	695.5
	1.179	701	703	698.5
	1.18	699	702	699
	1.181	696	703	692
	1.182	699	703	697
	1.183	696	704.5	693.5
	1.184	696	704	696
	1.185	694.5	700.5	696
	1.186	696	704.5	697.5
	1.187	697.5	702	695
	1.188	696	704	696
	1.189	699	700.5	695.5
	1.19	699	701.5	697
	1.191	696	700.5	694
	1.192	696	700.5	695
	1.193	695	702	694.5
	1.194	696	703	697
	1.195	697.5	699.5	692
	1.196	696	701.5	696
	1.197	696	701	693
	1.198	695.5	697.5	695.5
	1.199	699	700	694.5
	1.2	696	701.5	695.5
	1.201	696	703	693
	1.202	696	699.5	696
	1.203	696	698.5	694.5
	1.204	696	700.5	694
	1.205	697	696.5	694.5
	1.206	698.5	698	694
	1.207	696	701.5	693
	1.208	700	697	697.5
	1.209	700	700	694
	1.21	697	696	697.5
	1.211	696	696	695.5
	1.212	697.5	694	692.5
	1.213	699.5	696	694.5
	1.214	702.5	700.5	692.5
	1.215	697.5	697.5	695
	1.216	699.5	697.5	695.5
	1.217	699.5	699	693.5
	1.218	699.5	698	694.5
	1.219	700	694.5	693
	1.22	701.5	695	694.5
	1.221	697.5	699	695.5
	1.222	700.5	696	692.5
	1.223	698	696	692.5
	1.224	697.5	697.5	695.5
	1.225	698	694.5	690.5
	1.226	698	693.5	692
	1.227	699	693.5	696
	1.228	700	693	696
	1.229	699.5	692	693.5
	1.23	697.5	694.5	694
	1.231	697.5	691.5	695
	1.232	697.5	693	695.5
	1.233	699.5	693.5	695.5
	1.234	697.5	690.5	694.5
	1.235	696	693	694.5
	1.236	698	694.5	692
	1.237	694.5	689.5	695
	1.238	695.5	694	694.5
	1.239	697.5	690.5	690
	1.24	698.5	693	696
	1.241	697.5	690.5	693.5
	1.242	695	693	693
	1.243	696	692	692
	1.244	695	690.5	693.5
	1.245	696	690.5	693
	1.246	694	688.5	694.5
	1.247	692.5	690.5	693
	1.248	696	690	691
	1.249	693	692.5	695.5
	1.25	692.5	688	688.5
	1.251	694	690.5	693.5
	1.252	690.5	691	696
	1.253	690.5	690	692
	1.254	692	690.5	692
	1.255	690.5	689.5	693
	1.256	691	694	695.5
	1.257	691.5	687.5	693
	1.258	693	692	694
	1.259	692	690.5	696
	1.26	690.5	689.5	693.5
	1.261	690.5	688	696
	1.262	696	690.5	691.5
	1.263	688.5	690	696
	1.264	690	688	693.5
	1.265	687.5	687.5	696
	1.266	687.5	691	695
	1.267	690	689	696
	1.268	690.5	692.5	695
	1.269	690.5	688	694
	1.27	687.5	689.5	696
	1.271	690	691.5	696
	1.272	687	692	696
	1.273	690.5	693	697.5
	1.274	690.5	691	699.5
	1.275	686	691	697.5
	1.276	690	691	697.5
	1.277	687.5	689	697.5
	1.278	690.5	692	695
	1.279	691	691.5	696
	1.28	690.5	688.5	698
	1.281	689.5	693.5	695
	1.282	690.5	692	700
	1.283	692	692	695
	1.284	689	694	697.5
	1.285	691	694	695
	1.286	687	693.5	695
	1.287	692	692.5	693.5
	1.288	691	696	693.5
	1.289	686.5	695.5	697.5
	1.29	688.5	694.5	699.5
	1.291	687.5	694.5	697
	1.292	690.5	693	693
	1.293	688	695.5	696
	1.294	691	695.5	696
	1.295	688.5	695	698.5
	1.296	691	695	699.5
	1.297	690.5	695.5	695
	1.298	691.5	694.5	693.5
	1.299	690	695	696
	1.3	688.5	694	696
	1.301	690.5	692.5	697.5
	1.302	693	696	695
	1.303	694	696	695
	1.304	692	697.5	696
	1.305	692	697.5	696
	1.306	692	691.5	695.5
	1.307	692	694	698.5
	1.308	690.5	693.5	696
	1.309	690	694.5	695
	1.31	691	695.5	697
	1.311	691.5	697.5	694.5
	1.312	688	694	692.5
	1.313	692.5	694	697
	1.314	694	691	694.5
	1.315	690.5	694.5	697.5
	1.316	693	691	696
	1.317	693	692.5	694.5
	1.318	695	693.5	695.5
	1.319	694	692.5	696
	1.32	693	693.5	696
	1.321	696	689.5	696
	1.322	693.5	693.5	696
	1.323	696	691	695
	1.324	692.5	690.5	696
	1.325	693.5	689.5	690.5
	1.326	691.5	689.5	695.5
	1.327	691.5	690.5	699
	1.328	696	692	696
	1.329	691.5	688.5	695.5
	1.33	692	688	697.5
	1.331	693.5	690.5	696
	1.332	696	690	698
	1.333	692.5	693.5	696
	1.334	693	692	694
	1.335	692.5	691	695.5
	1.336	693	690	698
	1.337	693.5	688.5	697.5
	1.338	694	688	695.5
	1.339	697.5	691.5	699.5
	1.34	696	689.5	696
	1.341	695	688.5	696
	1.342	696	689.5	695.5
	1.343	696	692	696
	1.344	695.5	687.5	695.5
	1.345	695	690	697
	1.346	697.5	695	695.5
	1.347	697.5	692	698
	1.348	692	689	696
	1.349	696	693.5	697.5
	1.35	693	691	696
	1.351	698	694	696
	1.352	695.5	689.5	700
	1.353	697.5	690.5	695.5
	1.354	698.5	691.5	695
	1.355	700	691	696
	1.356	698	690	698.5
	1.357	692.5	691.5	696
	1.358	695.5	689.5	696
	1.359	695	694	696
	1.36	696	692	697.5
	1.361	696.5	688	700.5
	1.362	697.5	689	697.5
	1.363	695	693	699
	1.364	698	695.5	701
	1.365	697.5	688.5	702
	1.366	697.5	692	695
	1.367	698	690.5	699
	1.368	697.5	692	697.5
	1.369	698.5	692.5	699.5
	1.37	696	693	700.5
	1.371	695	693	699.5
	1.372	697.5	692	697.5
	1.373	696	693	701
	1.374	697.5	690.5	697.5
	1.375	701	687	699.5
	1.376	698.5	690	699.5
	1.377	703.5	690.5	699.5
	1.378	699	691	701
	1.379	698	690	699
	1.38	698.5	690.5	697.5
	1.381	698.5	691	699
	1.382	700.5	695.5	696
	1.383	697.5	693	697
	1.384	698	694	696
	1.385	699.5	692	695.5
	1.386	699.5	692	698.5
	1.387	699	693	699.5
	1.388	702.5	693	698.5
	1.389	700	692	699
	1.39	698.5	695	701
	1.391	696	693	697
	1.392	699.5	691.5	697.5
	1.393	704.5	691.5	697.5
	1.394	698.5	692	697.5
	1.395	700.5	690.5	696
	1.396	698	691	698
	1.397	697	695.5	696
	1.398	695.5	693.5	699.5
	1.399	698.5	692.5	696
	1.4	698.5	691.5	698.5
	1.401	700.5	693.5	696
	1.402	698.5	692	695.5
	1.403	700	691	696
	1.404	699.5	691	695.5
	1.405	699.5	695.5	694.5
	1.406	697.5	691.5	693.5
	1.407	697	694	691.5
	1.408	701	692	696
	1.409	696	694	693.5
	1.41	700	694.5	696
	1.411	697.5	695.5	694.5
	1.412	698.5	691.5	695
	1.413	697.5	692	696
	1.414	698	694	694.5
	1.415	696	692.5	694
	1.416	694.5	690.5	693.5
	1.417	698.5	693.5	690
	1.418	699	691	693
	1.419	697.5	694	693.5
	1.42	699	692.5	693.5
	1.421	699	693	692.5
	1.422	697.5	695.5	691.5
	1.423	699	694	692
	1.424	697	689	691
	1.425	698	696	693.5
	1.426	700.5	694.5	692.5
	1.427	699	692.5	692.5
	1.428	696	697.5	694.5
	1.429	699.5	692	693.5
	1.43	696	694	690
	1.431	695	695.5	690.5
	1.432	696	693.5	690.5
	1.433	696	695	686
	1.434	692	694	691
	1.435	697	696	690.5
	1.436	698	694	693
	1.437	696	694.5	686.5
	1.438	695	693	686.5
	1.439	695	695.5	689.5
	1.44	696	693.5	689
	1.441	696	697.5	690.5
	1.442	695	694	690.5
	1.443	696	694.5	690
	1.444	694	694	688.5
	1.445	692	695	690
	1.446	693	691	687
	1.447	695	692	690.5
	1.448	693	691.5	688.5
	1.449	697	696	689
	1.45	693.5	694	692.5
	1.451	696	691.5	689
	1.452	694.5	695	688
	1.453	694	693	691
	1.454	695	694.5	690.5
	1.455	698	696	688.5
	1.456	692.5	695	692
	1.457	696	693	688
	1.458	696	697.5	688.5
	1.459	694.5	695.5	694.5
	1.46	695	698	688.5
	1.461	696	691.5	687
	1.462	692.5	698.5	685.5
	1.463	695	696	690
	1.464	694	692.5	687.5
	1.465	696	692	687.5
	1.466	698	694	685
	1.467	693.5	696	690.5
	1.468	692	696.5	688.5
	1.469	700.5	692.5	690.5
	1.47	701.5	694.5	687.5
	1.471	694	696	692
	1.472	692.5	694.5	691.5
	1.473	696	696	690.5
	1.474	697.5	697.5	689
	1.475	697.5	696	690.5
	1.476	695.5	692	690.5
	1.477	697.5	695.5	691.5
	1.478	699	695.5	689
	1.479	699	697.5	692
	1.48	698	696	693
	1.481	694.5	696	691
	1.482	698.5	696	690.5
	1.483	696	695	691
	1.484	696	695.5	688.5
	1.485	697.5	697.5	694
	1.486	695	695	695
	1.487	697.5	692	692.5
	1.488	698	697.5	690.5
	1.489	694.5	696.5	694
	1.49	699	695.5	691.5
	1.491	698.5	695	696
	1.492	697	697	693.5
	1.493	697.5	694.5	697
	1.494	698.5	693	694.5
	1.495	696	697.5	695
	1.496	698	692.5	693
	1.497	695.5	693.5	696
	1.498	696	695.5	696
	1.499	698.5	694.5	697.5
	1.5	700	693	693
	1.501	699.5	695.5	692
	1.502	698.5	695.5	697.5
	1.503	696	696	699.5
	1.504	701	698	697.5
	1.505	696	696	696
	1.506	698	692	694.5
	1.507	699	694	698
	1.508	696	696	696
	1.509	699.5	694.5	696
	1.51	701	694	696
	1.511	700	694.5	700
	1.512	700.5	694	701
	1.513	698	696	701.5
	1.514	698	692.5	697.5
	1.515	698	691.5	700.5
	1.516	697.5	691.5	697.5
	1.517	696	695	702
	1.518	697.5	694.5	696
	1.519	701	696	699.5
	1.52	697.5	692	698
	1.521	695	694.5	701.5
	1.522	697.5	697.5	698.5
	1.523	694.5	699	702
	1.524	696	693	696
	1.525	696	692.5	700
	1.526	699.5	694	698
	1.527	698	694	696
	1.528	697.5	694.5	697.5
	1.529	699.5	690.5	700
	1.53	694	690.5	699
	1.531	697.5	692	701
	1.532	695	694.5	698.5
	1.533	697.5	693	701
	1.534	698.5	690.5	702
	1.535	697.5	696	701.5
	1.536	694.5	696	702
	1.537	696	695.5	702.5
	1.538	696	696	704
	1.539	700.5	693.5	697.5
	1.54	698.5	696	703
	1.541	696	692.5	701
	1.542	696	694	706.5
	1.543	693.5	695.5	703.5
	1.544	699.5	697.5	704
	1.545	696	692	705.5
	1.546	699.5	692.5	710.5
	1.547	696.5	691.5	704.5
	1.548	694	692.5	704.5
	1.549	699.5	691	703.5
	1.55	696	695	704.5
	1.551	695.5	691	705
	1.552	698	693	710
	1.553	693.5	692	708
	1.554	699.5	695.5	706.5
	1.555	694.5	690.5	707.5
	1.556	700.5	696	705
	1.557	696	693.5	711
	1.558	697.5	693	703.5
	1.559	699.5	693	708
	1.56	696	695.5	705
	1.561	701	691	704.5
	1.562	701	691.5	704
	1.563	697.5	690.5	709
	1.564	696	690	706
	1.565	700	690.5	704.5
	1.566	699	690	703.5
	1.567	697.5	689.5	704.5
	1.568	698.5	690	702
	1.569	695	689	702
	1.57	701	689	704.5
	1.571	698	689.5	702.5
	1.572	696	687.5	701
	1.573	700.5	686.5	699
	1.574	695.5	687	699.5
	1.575	699	688.5	703.5
	1.576	698.5	685.5	699.5
	1.577	696	681	697.5
	1.578	697.5	684	695.5
	1.579	692	684.5	696
	1.58	694.5	681	698
	1.581	695	679.5	695.5
	1.582	696	677	694.5
	1.583	696	679	695
	1.584	695.5	677	693.5
	1.585	696	671.5	692.5
	1.586	694	676	690.5
	1.587	694	670	688.5
	1.588	695	672.5	690
	1.589	693.5	671	687
	1.59	693	670	689.5
	1.591	696	665	686.5
	1.592	690.5	659.5	687
	1.593	692	660	684
	1.594	692	662.5	681
	1.595	691.5	656	677.5
	1.596	693	655.5	679.5
	1.597	691	654.5	678
	1.598	692.5	654	676
	1.599	691	646.5	672
	1.6	691.5	645	669.5
	1.601	689	640	670
	1.602	690.5	639.5	668.5
	1.603	689.5	636	664
	1.604	689.5	639	662.5
	1.605	689	632	659.5
	1.606	690.5	629	656.5
	1.607	691	626	658
	1.608	685.5	622	653.5
	1.609	687	621.5	648
	1.61	692	617	647
	1.611	689	613.5	645.5
	1.612	688.5	606.5	642.5
	1.613	687.5	602.5	637
	1.614	689.5	599.5	636
	1.615	686	595.5	634
	1.616	690	590	627.5
	1.617	683.5	585.5	626
	1.618	686.5	579.5	625
	1.619	689.5	578.5	621.5
	1.62	685.5	573	616
	1.621	686	567.5	615.5
	1.622	686.5	561.5	610
	1.623	687.5	558.5	606
	1.624	684.5	553	606.5
	1.625	686	544.5	599
	1.626	684.5	539.5	595
	1.627	684.5	534.5	591.5
	1.628	686.5	526.5	589.5
	1.629	688.5	519.5	584.5
	1.63	684	513.5	580.5
	1.631	681	508	578.5
	1.632	684	499	573.5
	1.633	683.5	495	571
	1.634	680	490	561.5
	1.635	684	482.5	559.5
	1.636	680.5	471.5	554
	1.637	676	464.5	554
	1.638	677	457.5	546.5
	1.639	680.5	449.5	540.5
	1.64	678	441.5	539.5
	1.641	673.5	429	530.5
	1.642	673.5	427.5	527
	1.643	675	416	521.5
	1.644	671.5	410.5	516
	1.645	671.5	399.5	511.5
	1.646	666	394.5	510.5
	1.647	665.5	385	501
	1.648	666	377	494.5
	1.649	660.5	368	490.5
	1.65	660.5	359.5	485.5
	1.651	657.5	350	480.5
	1.652	651	343	477
	1.653	654	335.5	468.5
	1.654	655.5	324	464.5
	1.655	646.5	318.5	457.5
	1.656	646	311.5	453.5
	1.657	642.5	301	444
	1.658	642	292.5	438
	1.659	638	283	431.5
	1.66	636	274.5	428.5
	1.661	633.5	268.5	419.5
	1.662	628.5	260	414
	1.663	627	255.5	408.5
	1.664	621.5	247	403.5
	1.665	620.5	239	396.5
	1.666	616	232.5	392.5
	1.667	611	224.5	383
	1.668	608	218	379
	1.669	602.5	208	373.5
	1.67	599.5	203.5	365.5
	1.671	591.5	198	359.5
	1.672	589	190.5	354
	1.673	582	187.5	345
	1.674	580.5	179.5	343
	1.675	571.5	174	334.5
	1.676	568	171	332.5
	1.677	565	164	325
	1.678	555	163.5	320.5
	1.679	549.5	158	313
	1.68	541.5	154	309
	1.681	536	153	304.5
	1.682	525.5	148.5	298.5
	1.683	519.5	143.5	292.5
	1.684	514	138	288.5
	1.685	503.5	139.5	280.5
	1.686	494.5	136	275.5
	1.687	488.5	130.5	272
	1.688	479.5	130	266.5
	1.689	467.5	123	259
	1.69	459	126	255.5
	1.691	450	120.5	251.5
	1.692	437.5	121	246
	1.693	430.5	120	242
	1.694	418.5	114	239.5
	1.695	410.5	113	232
	1.696	400.5	107	227
	1.697	389	109	219.5
	1.698	379	108	218
	1.699	368	102	217.5
	1.7	358.5	102.5	209
	1.701	347	103	205.5
	1.702	337	101	202
	1.703	326.5	96	196.5
	1.704	311.5	97.5	195.5
	1.705	305.5	97.5	189.5
	1.706	297	95	186
	1.707	287	93.5	181
	1.708	276	89.5	177
	1.709	267	90	177.5
	1.71	259.5	90	175
	1.711	250	85.5	172
	1.712	242	85.5	168
	1.713	234	85	162.5
	1.714	227	78.5	161.5
	1.715	222.5	77	160.5
	1.716	211.5	76.5	153
	1.717	206.5	74.5	150.5
	1.718	197.5	74.5	149.5
	1.719	192.5	69.5	144
	1.72	192.5	69.5	139
	1.721	186.5	68	138.5
	1.722	180.5	67	140
	1.723	177	62	136.5
	1.724	174.5	63.5	134.5
	1.725	169.5	59	132
	1.726	165	62	129.5
	1.727	160.5	60	126
	1.728	155.5	54.5	122.5
	1.729	155	56	122
	1.73	150.5	53.5	120
	1.731	147	53	116
	1.732	141	51.5	118.5
	1.733	137	51	115
	1.734	135.5	47.5	113
	1.735	133	45.5	110
	1.736	126	46.5	107.5
	1.737	127	41.5	106
	1.738	119.5	45	108.5
	1.739	116.5	43	106
	1.74	116	44.5	105
	1.741	111	41	100.5
	1.742	103.5	35	102
	1.743	106	39.5	100.5
	1.744	100.5	40.5	103
	1.745	101	39	96.5
	1.746	94	39	95.5
	1.747	95	38.5	94.5
	1.748	93.5	36	94
	1.749	90.5	37	92.5
	1.75	88.5	37.5	94
	1.751	88	35.5	90.5
	1.752	84	35.5	91
	1.753	86	34.5	89.5
	1.754	80	33.5	89.5
	1.755	84	34	91
	1.756	79.5	31.5	86.5
	1.757	75	36.5	88.5
	1.758	76.5	30.5	89.5
	1.759	75	32.5	89
	1.76	75	36.5	88
	1.761	75.5	33.5	87.5
	1.762	74.5	34	87.5
	1.763	76	34	89.5
	1.764	70	34.5	90
	1.765	73	37.5	88
	1.766	71.5	35.5	90
	1.767	71	34.5	88
	1.768	69.5	36.5	89
	1.769	70.5	34	86
	1.77	69	41	88
	1.771	68	36	88
	1.772	67	40	87.5
	1.773	68.5	41	92.5
	1.774	68.5	43	88.5
	1.775	70.5	45.5	91
	1.776	65	43.5	89
	1.777	69.5	44.5	92
	1.778	68	46.5	93
	1.779	65.5	46.5	94.5
	1.78	64	50	95.5
	1.781	65	50	96.5
	1.782	67	52	97
	1.783	61.5	49.5	96.5
	1.784	65	56.5	98.5
	1.785	63.5	57	98
	1.786	61.5	58.5	99.5
	1.787	63.5	57	102.5
	1.788	57.5	61.5	104.5
	1.789	65.5	59.5	104
	1.79	62.5	66.5	106
	1.791	57.5	69	105.5
	1.792	66.5	65.5	110.5
	1.793	62.5	69	111
	1.794	59.5	76.5	112
	1.795	64.5	74	114
	1.796	63	80	116.5
	1.797	63.5	78	121
	1.798	63	82.5	122.5
	1.799	61.5	83.5	123.5
	1.8	63.5	83.5	128.5
	1.801	62	88	127.5
	1.802	61.5	88.5	129
	1.803	61	92.5	133.5
	1.804	61.5	94.5	137.5
	1.805	59.5	97	140.5
	1.806	63	101.5	146.5
	1.807	60	104.5	146.5
	1.808	61	105.5	150
	1.809	62	111.5	153.5
	1.81	60	118.5	160
	1.811	60	132	166
	1.812	54.5	144	172.5
	1.813	57.5	160.5	178.5
	1.814	55.5	169.5	184.5
	1.815	57.5	186	191.5
	1.816	59.5	193	198
	1.817	55	206.5	206.5
	1.818	56.5	211	212
	1.819	56.5	219.5	215.5
	1.82	58	222	218
	1.821	58.5	224.5	222
	1.822	59	230	228
	1.823	57.5	227	227.5
	1.824	61	229	232.5
	1.825	57	225.5	238.5
	1.826	61	221.5	240
	1.827	66	220	236.5
	1.828	64	216	238.5
	1.829	65	212	241
	1.83	65.5	207.5	242
	1.831	68	206	242.5
	1.832	69.5	203	242
	1.833	69	198	244
	1.834	68.5	198	245
	1.835	71	191.5	240
	1.836	72	184.5	241
	1.837	73.5	184	244
	1.838	78	185.5	243.5
	1.839	78.5	185.5	242
	1.84	82	182	243.5
	1.841	83.5	183	246
	1.842	85	185	241.5
	1.843	88	189.5	245
	1.844	90	189.5	246
	1.845	93.5	193	246.5
	1.846	93	189.5	246
	1.847	98	197.5	249.5
	1.848	98.5	198	250
	1.849	99	202.5	251.5
	1.85	105	203	253
	1.851	111	209	255
	1.852	110.5	211.5	254
	1.853	115	218	255
	1.854	118	223	256
	1.855	123	227	262.5
	1.856	125.5	229.5	261.5
	1.857	129	238.5	267.5
	1.858	132	243	267.5
	1.859	133.5	249	268
	1.86	137.5	253	269
	1.861	138.5	260.5	274
	1.862	139	268.5	275.5
	1.863	146.5	273.5	282
	1.864	144	281.5	282
	1.865	147	288	286.5
	1.866	149	295	291.5
	1.867	153	303.5	297
	1.868	158	312	296.5
	1.869	159.5	315	303.5
	1.87	159.5	322.5	307
	1.871	164	329.5	313.5
	1.872	165	340	315.5
	1.873	172	348.5	323.5
	1.874	173.5	353	325.5
	1.875	176.5	362.5	334.5
	1.876	181.5	373.5	339
	1.877	182.5	376.5	345.5
	1.878	186	387	350.5
	1.879	194	396.5	358.5
	1.88	195.5	409	366.5
	1.881	195.5	421	369
	1.882	200.5	431.5	379.5
	1.883	202.5	442.5	384.5
	1.884	208.5	453.5	395
	1.885	211	468	400.5
	1.886	213.5	476	410
	1.887	218.5	494.5	414.5
	1.888	221.5	511.5	426
	1.889	222	519	431.5
	1.89	224	538.5	438.5
	1.891	225.5	553.5	447.5
	1.892	224	570.5	454.5
	1.893	225	586.5	465.5
	1.894	223	604.5	472
	1.895	225	621.5	482.5
	1.896	219.5	641	488
	1.897	220.5	660.5	502
	1.898	219	684	515
	1.899	221	703.5	520
	1.9	218.5	727.5	531.5
	1.901	219.5	752	540
	1.902	216	773.5	552.5
	1.903	218.5	798.5	567.5
	1.904	219	827.5	576
	1.905	217	850.5	590.5
	1.906	220.5	875	599
	1.907	220.5	904	620.5
	1.908	222.5	930	629.5
	1.909	224.5	960	643
	1.91	223	986	657
	1.911	229	1016.5	671.5
	1.912	235	1044	688.5
	1.913	237	1068.5	703
	1.914	238	1097.5	714.5
	1.915	244.5	1121.5	731.5
	1.916	247.5	1148.5	746
	1.917	253.5	1173	761
	1.918	254.5	1198.5	770.5
	1.919	259	1224	785.5
	1.92	267	1245.5	800
	1.921	274.5	1268	815
	1.922	278.5	1286	828.5
	1.923	282.5	1305.5	844.5
	1.924	287.5	1321.5	857.5
	1.925	300	1342	871
	1.926	304	1359.5	887
	1.927	312	1367	895.5
	1.928	319.5	1388	909
	1.929	330.5	1404	919.5
	1.93	343	1420	934
	1.931	347	1426.5	943.5
	1.932	359.5	1446	957
	1.933	369	1456.5	971
	1.934	381	1475	979
	1.935	390.5	1482	991.5
	1.936	403.5	1501	1000
	1.937	412.5	1514	1014
	1.938	426	1522.5	1026.5
	1.939	436.5	1539	1034.5
	1.94	448	1545.5	1048
	1.941	465	1560.5	1053.5
	1.942	472	1573	1063
	1.943	490.5	1587	1076
	1.944	501	1598	1089
	1.945	519	1613.5	1094.5
	1.946	530.5	1624	1105.5
	1.947	548.5	1634.5	1113.5
	1.948	567	1646.5	1127.5
	1.949	586	1661	1137.5
	1.95	600	1675.5	1147
	1.951	621	1688.5	1156
	1.952	637.5	1706	1164
	1.953	662.5	1721	1173
	1.954	681	1739.5	1187.5
	1.955	702	1751	1200.5
	1.956	724.5	1769.5	1207.5
	1.957	746	1783	1222.5
	1.958	770.5	1804.5	1232.5
	1.959	796.5	1817.5	1244.5
	1.96	820.5	1834	1254.5
	1.961	850.5	1844	1270
	1.962	872	1864	1277.5
	1.963	895	1874	1292
	1.964	923	1888.5	1303
	1.965	948.5	1903.5	1307
	1.966	978	1918.5	1324.5
	1.967	1005	1933.5	1334.5
	1.968	1032	1943.5	1347.5
	1.969	1058.5	1953	1358
	1.97	1083.5	1963	1366.5
	1.971	1109.5	1978	1381.5
	1.972	1135.5	1991.5	1394
	1.973	1157	2002	1402.5
	1.974	1180	2014	1415
	1.975	1197.5	2023	1425.5
	1.976	1217.5	2032	1437.5
	1.977	1240	2044	1451.5
	1.978	1259.5	2051.5	1463
	1.979	1275.5	2059	1471
	1.98	1291	2067.5	1484
	1.981	1306.5	2067.5	1498
	1.982	1322	2082.5	1508.5
	1.983	1335	2082.5	1515.5
	1.984	1347	2096.5	1525
	1.985	1357	2103	1534.5
	1.986	1374	2112.5	1545.5
	1.987	1381.5	2112.5	1559.5
	1.988	1394	2126.5	1569
	1.989	1407	2127	1575.5
	1.99	1419	2133	1588.5
	1.991	1426.5	2142	1597.5
	1.992	1441.5	2142	1605.5
	1.993	1452	2142	1616
[truncated: 13,006 more rows]

## Sheet: D
DataTypeVer2.0	Time	Fz	Fz	Fz
NumberOfData		8000	8000	8000
PreTriggerData		0	0	0
SamplingTime[ms]		1	1	1
DataLabel		N1:CMJ	N2:CMJ	N3:CMJ
DataUnit	sec	N	N	N
	0	623	629.5	631
	0.001	622	625.5	627.5
	0.002	625	629	632
	0.003	622	629	630
	0.004	622	632.5	632.5
	0.005	623.5	628.5	628.5
	0.006	621.5	630.5	628
	0.007	624	628	629
	0.008	625	629	628
	0.009	623	628	627.5
	0.01	626	630	629.5
	0.011	622	629	629.5
	0.012	622	628.5	628.5
	0.013	625.5	630	629
	0.014	626	632	625.5
	0.015	626	632.5	626
	0.016	625.5	630	625.5
	0.017	625.5	629.5	625.5
	0.018	622.5	630.5	627
	0.019	626	630	625.5
	0.02	623	629	626
	0.021	625	635	624.5
	0.022	627	625	623.5
	0.023	626	627.5	622
	0.024	629.5	630.5	625.5
	0.025	627.5	629	624.5
	0.026	628.5	627	625.5
	0.027	629	630	625.5
	0.028	626	626	622
	0.029	629.5	627	624.5
	0.03	627.5	631	623
	0.031	629	629.5	625
	0.032	630.5	625.5	622.5
	0.033	626	630.5	626
	0.034	630.5	627.5	626
	0.035	629.5	631.5	623.5
	0.036	629.5	627.5	625
	0.037	629.5	631.5	623.5
	0.038	629.5	629.5	624.5
	0.039	632.5	631	628.5
	0.04	633.5	632.5	620.5
	0.041	630.5	629.5	624.5
	0.042	633	629	625
	0.043	634.5	629.5	626
	0.044	633	626	622
	0.045	629	632	625
	0.046	633	630	622
	0.047	633	630	624.5
	0.048	635.5	628.5	623.5
	0.049	633	628.5	622.5
	0.05	633	627.5	622
	0.051	631.5	631	623.5
	0.052	634.5	628	626
	0.053	633.5	626	623.5
	0.054	633.5	626	624
	0.055	635	627.5	625
	0.056	632.5	627.5	626
	0.057	631.5	627	624
	0.058	633.5	629	625
	0.059	630.5	629	621
	0.06	631	626	624.5
	0.061	630.5	626	624.5
	0.062	630.5	629	624.5
	0.063	634.5	628.5	626
	0.064	630	629	623
	0.065	637	627.5	625
	0.066	631.5	626	625.5
	0.067	632.5	627	624.5
	0.068	633.5	628	624.5
	0.069	632.5	622	624.5
	0.07	633	629	626
	0.071	633.5	625.5	625
	0.072	631.5	624.5	622.5
	0.073	631	627.5	622
	0.074	633.5	628.5	621.5
	0.075	632	629.5	625.5
	0.076	631.5	629	627
	0.077	634.5	626	624.5
	0.078	633	627	628.5
	0.079	634	626	628
	0.08	630	628	627
	0.081	635	625.5	627.5
	0.082	637.5	630	624
	0.083	631.5	626	625
	0.084	631.5	627.5	629
	0.085	636	629	632.5
	0.086	633	630.5	629
	0.087	632.5	629	624
	0.088	630	626	627.5
	0.089	632	630.5	625.5
	0.09	631.5	634	627.5
	0.091	631.5	626	626
	0.092	630.5	631	626
	0.093	628.5	629.5	628
	0.094	632	629.5	631
	0.095	633	632.5	629
	0.096	629.5	631	626
	0.097	631.5	629.5	626
	0.098	630.5	634	626
	0.099	629	629.5	630
	0.1	631	636	626
	0.101	632	628	629
	0.102	630.5	635	629
	0.103	629	631	624.5
	0.104	627.5	634.5	626
	0.105	631	634.5	630.5
	0.106	631.5	630.5	627.5
	0.107	628.5	632.5	631.5
	0.108	631	637.5	627
	0.109	631.5	632.5	630.5
	0.11	629.5	633	628
	0.111	629	633	630.5
	0.112	630.5	637	629
	0.113	631	632.5	630
	0.114	630	634.5	626
	0.115	632.5	632.5	629
	0.116	634.5	635	633
	0.117	630	634.5	631
	0.118	629	637	633
	0.119	629	635.5	629.5
	0.12	627.5	635.5	631.5
	0.121	628.5	631.5	631
	0.122	629.5	634.5	628.5
	0.123	632.5	635	631
	0.124	628.5	630.5	632
	0.125	626	638	631.5
	0.126	628	634	631
	0.127	631.5	636	633.5
	0.128	629.5	634.5	631
	0.129	631.5	635	631
	0.13	629.5	632.5	632.5
	0.131	632.5	631.5	632.5
	0.132	631	635.5	632.5
	0.133	627.5	631.5	634
	0.134	629.5	636	632.5
	0.135	628	634.5	633.5
	0.136	631.5	634	630
	0.137	629.5	633.5	636
	0.138	629.5	635.5	632
	0.139	629	636	635
	0.14	631	634.5	636
	0.141	628.5	634	632
	0.142	631	635	632
	0.143	628	631.5	631
	0.144	627	633.5	635
	0.145	631	631.5	632
	0.146	631	635	631.5
	0.147	629.5	635	632.5
	0.148	626	635.5	633.5
	0.149	630	630.5	633
	0.15	631	636	632.5
	0.151	629	634.5	635
	0.152	630	636.5	632
	0.153	631	630	636
	0.154	627.5	636.5	631.5
	0.155	628	633.5	633
	0.156	632.5	629.5	633
	0.157	629.5	630.5	634
	0.158	630.5	632	636
	0.159	630.5	633.5	634.5
	0.16	629.5	634	634.5
	0.161	632	633	634
	0.162	631.5	636	632
	0.163	628.5	634.5	633
	0.164	633	631.5	636
	0.165	629.5	635	635.5
	0.166	631.5	635	631.5
	0.167	629.5	633.5	630.5
	0.168	629.5	634.5	636.5
	0.169	633	631.5	636
	0.17	629	634.5	631.5
	0.171	629.5	629	631
	0.172	630.5	631	631
	0.173	632	630.5	632
	0.174	629	631.5	631
	0.175	631	629.5	632
	0.176	630.5	635	633
	0.177	634.5	634.5	632
	0.178	633	634.5	630.5
	0.179	630	631.5	634
	0.18	631.5	634.5	632.5
	0.181	634.5	631.5	631
	0.182	629	633.5	634.5
	0.183	631.5	633	634.5
	0.184	629.5	632.5	631
	0.185	629.5	635.5	633.5
	0.186	630.5	630.5	636
	0.187	631.5	633.5	631
	0.188	629.5	630	633
	0.189	629	632	631
	0.19	633	633	632.5
	0.191	634.5	631	633
	0.192	634.5	630	634
	0.193	627.5	629	630
	0.194	630	633.5	631.5
	0.195	633.5	633.5	632.5
	0.196	627.5	632.5	631.5
	0.197	633	633	632
	0.198	629	631.5	630
	0.199	629	630.5	630
	0.2	632	633.5	632.5
	0.201	632.5	631	630.5
	0.202	630	629	632
	0.203	628.5	630.5	631.5
	0.204	630	634	632.5
	0.205	629	634	633.5
	0.206	629	632	632
	0.207	632.5	633	629.5
	0.208	629.5	631	631
	0.209	632	630.5	631
	0.21	630.5	635.5	628.5
	0.211	628.5	633.5	630.5
	0.212	630	636	630
	0.213	628.5	634	631.5
	0.214	627	634.5	630
	0.215	627.5	631.5	627.5
	0.216	631.5	631	628
	0.217	629.5	633.5	630
	0.218	628	630	631
	0.219	629.5	632.5	631.5
	0.22	629	633.5	630.5
	0.221	629	636.5	631
	0.222	630	633	631.5
	0.223	632	635.5	631.5
	0.224	629	636	631.5
	0.225	632.5	636	628.5
	0.226	629.5	633.5	631.5
	0.227	628.5	632.5	631.5
	0.228	629.5	635	629.5
	0.229	630.5	631	624
	0.23	629	636.5	629.5
	0.231	629.5	635	630
	0.232	627.5	631.5	631.5
	0.233	628	632.5	630
	0.234	629.5	633.5	632
	0.235	631.5	632	629
	0.236	629	632	631
	0.237	628	632	629.5
	0.238	630	633	626
	0.239	630.5	634	631
	0.24	630.5	633	626
	0.241	631	632.5	628
	0.242	632	632	624
	0.243	631	630	625
	0.244	632	630.5	629
	0.245	631	629.5	628.5
	0.246	633.5	628.5	627.5
	0.247	629	632.5	627.5
	0.248	630.5	630	626
	0.249	628	634	625.5
	0.25	633.5	628.5	626
	0.251	633	629.5	629
	0.252	633	631	628
	0.253	631.5	630.5	629
	0.254	629	630.5	625.5
	0.255	631	632.5	627
	0.256	633.5	628.5	626
	0.257	632	630	629
	0.258	629.5	631	624.5
	0.259	631	631.5	630
	0.26	628.5	628	621.5
	0.261	628.5	633.5	628
	0.262	629.5	631	627
	0.263	629	632	625
	0.264	630	628.5	626
	0.265	633	628.5	625.5
	0.266	631	630	629
	0.267	632.5	629	626
	0.268	631	631	623.5
	0.269	633.5	626	625.5
	0.27	629.5	629	628
	0.271	633	632	625.5
	0.272	632.5	627	623.5
	0.273	629	629.5	626
	0.274	633	629	622
	0.275	630	629	627
	0.276	633	628	625.5
	0.277	632	628.5	627
	0.278	632	632	628.5
	0.279	630	629.5	623.5
	0.28	629.5	631	626
	0.281	626	629	623.5
	0.282	628.5	632.5	625
	0.283	630.5	629	624.5
	0.284	633	630	625
	0.285	630	631	624.5
	0.286	629.5	627.5	625.5
	0.287	629.5	628	627.5
	0.288	629	628	624.5
	0.289	629.5	627	623
	0.29	630.5	628	628
	0.291	629	628.5	626
	0.292	630.5	625	626
	0.293	631.5	630.5	625
	0.294	629.5	629	625
	0.295	629	626	627.5
	0.296	629.5	629	629
	0.297	631	627.5	623
	0.298	630	629.5	625.5
	0.299	629.5	628.5	627
	0.3	631.5	627	628
	0.301	629.5	626	627.5
	0.302	630.5	629	627.5
	0.303	627.5	627	627.5
	0.304	629.5	627	629
	0.305	633	626	627
	0.306	629.5	628.5	628.5
	0.307	629	629	627
	0.308	633.5	628	629
	0.309	632.5	629.5	630
	0.31	629	627.5	629.5
	0.311	628.5	626	627.5
	0.312	629	628	629.5
	0.313	630	628	626
	0.314	631	629	628
	0.315	626.5	627.5	628
	0.316	632.5	624	626
	0.317	633.5	627	629
	0.318	629.5	627	628
	0.319	630	628	629
	0.32	629.5	625.5	629.5
	0.321	631.5	626	633
	0.322	631.5	626	628.5
	0.323	628	628	631.5
	0.324	629.5	626	630.5
	0.325	628	626	633
	0.326	629.5	628.5	632.5
	0.327	632	629	633
	0.328	632	631.5	632
	0.329	627	629.5	627.5
	0.33	630.5	628	629
	0.331	630	627.5	632.5
	0.332	632	628	630.5
	0.333	629.5	629.5	634
	0.334	632.5	629	629
	0.335	634.5	627.5	629
	0.336	632	629	634.5
	0.337	634	626	636
	0.338	632	626	630.5
	0.339	632	626	630.5
	0.34	633.5	627.5	631.5
	0.341	631	629.5	630.5
	0.342	632.5	627.5	632
	0.343	634	630.5	632
	0.344	633	629.5	631.5
	0.345	633	630	629
	0.346	637	629	631.5
	0.347	633.5	633	633.5
	0.348	629	632	632
	0.349	631.5	632.5	630.5
	0.35	634.5	633	633
	0.351	633.5	629.5	634
	0.352	635	631	631
	0.353	635.5	632.5	632
	0.354	636.5	633.5	637
	0.355	636	631.5	632.5
	0.356	636	635	632
	0.357	635.5	633.5	632
	0.358	637.5	632.5	634.5
	0.359	636.5	633.5	633.5
	0.36	635	635	633
	0.361	633	635	635
	0.362	636.5	630	632
	0.363	636	632.5	633.5
	0.364	633	635	634
	0.365	638.5	635	634
	0.366	636	632.5	634
	0.367	635	633	635.5
	0.368	632	634.5	633.5
	0.369	634.5	634	634.5
	0.37	634	634.5	636
	0.371	633.5	633	632.5
	0.372	636	634	635.5
	0.373	634	632	635
	0.374	634.5	631	636
	0.375	635	632	634.5
	0.376	634	629.5	636
	0.377	632.5	632.5	633
	0.378	635.5	632	633.5
	0.379	633	629	633.5
	0.38	635	629	632
	0.381	633	631.5	635
	0.382	632.5	636.5	636
	0.383	633.5	631.5	636
	0.384	632.5	629	635.5
	0.385	633.5	629.5	634
	0.386	633.5	633	632
	0.387	632	627.5	634.5
	0.388	630.5	630.5	634.5
	0.389	632	629.5	631
	0.39	633.5	632	632
	0.391	631	630.5	633.5
	0.392	631.5	629.5	633.5
	0.393	631	635	632.5
	0.394	631.5	631.5	634.5
	0.395	632	630.5	630
	0.396	631.5	630	632.5
	0.397	632	630	634
	0.398	633.5	633	630.5
	0.399	632.5	631.5	631
	0.4	633.5	632	633.5
	0.401	631	630.5	634
	0.402	634.5	633.5	632.5
	0.403	633.5	631.5	634.5
	0.404	633	632	631
	0.405	632	631	631
	0.406	632.5	634.5	632.5
	0.407	631.5	631	634.5
	0.408	632.5	633	630
	0.409	636.5	633.5	633.5
	0.41	633	631	631.5
	0.411	633	631	631
	0.412	631	634.5	631.5
	0.413	632	631.5	633.5
	0.414	631	634	632.5
	0.415	630.5	634.5	632.5
	0.416	633.5	636	634.5
	0.417	633	635.5	628
	0.418	635.5	633.5	633.5
	0.419	634.5	634.5	631.5
	0.42	634.5	632.5	631.5
	0.421	632.5	632.5	630
	0.422	634	632	633.5
	0.423	632.5	634.5	629.5
	0.424	632	636	631.5
	0.425	631	633	631
	0.426	633.5	634.5	634
	0.427	635.5	634	632
	0.428	633	631.5	632
	0.429	633	632.5	633
	0.43	634.5	636	630.5
	0.431	635.5	634	634
	0.432	633	631.5	633
	0.433	632.5	632.5	635
	0.434	633.5	635	633
	0.435	633.5	635	632.5
	0.436	636.5	636	629.5
	0.437	630	632	633
	0.438	636	632	635
	0.439	634	636	632.5
	0.44	636	631.5	634.5
	0.441	636.5	633	631.5
	0.442	636	638	629.5
	0.443	636.5	632	636
	0.444	632.5	628.5	634.5
	0.445	635.5	632.5	633.5
	0.446	636	633.5	631.5
	0.447	635.5	630.5	630.5
	0.448	634.5	635	629.5
	0.449	638	632	632
	0.45	636	635.5	633.5
	0.451	633	635	631
	0.452	636	633	632.5
	0.453	635	634.5	632
	0.454	633	629.5	631
	0.455	632.5	628	633
	0.456	633.5	629.5	631
	0.457	636.5	636	631.5
	0.458	634	627.5	631
	0.459	630.5	632	630
	0.46	633	636	633.5
	0.461	633.5	629.5	635.5
	0.462	633.5	631	630.5
	0.463	632.5	631.5	631.5
	0.464	633	631	629.5
	0.465	632	629	628
	0.466	629	631.5	630
	0.467	631	632	627
	0.468	633.5	629.5	630
	0.469	629	629.5	628
	0.47	631	631	630.5
	0.471	628	631.5	628.5
	0.472	630	631.5	629.5
	0.473	629	633	630.5
	0.474	628	629	627
	0.475	629	625.5	626
	0.476	628.5	631.5	625.5
	0.477	622	629.5	629.5
	0.478	630	629	624
	0.479	621.5	627.5	625
	0.48	628.5	629	625.5
	0.481	626	629	624.5
	0.482	622.5	624.5	629
	0.483	629.5	626	629
	0.484	623	629	627.5
	0.485	626	625.5	628
	0.486	625	624.5	630
	0.487	617.5	623	626
	0.488	623.5	627	626
	0.489	624	625	626
	0.49	622	628	627.5
	0.491	622.5	627	628.5
	0.492	621.5	630.5	629.5
	0.493	622	626	624
	0.494	621.5	629	624
	0.495	622	627.5	626
	0.496	623	624	626
	0.497	622	627.5	633
	0.498	619.5	628	622.5
	0.499	622	623.5	628.5
	0.5	623	626	624
	0.501	623	629	629
	0.502	621	628.5	628
	0.503	624	629	629
	0.504	623.5	627	628.5
	0.505	621	627.5	628
	0.506	622	625	630
	0.507	620	628.5	631
	0.508	623.5	629	626
	0.509	622	626	630.5
	0.51	622.5	629	625.5
	0.511	623.5	628.5	626
	0.512	620	626	629
	0.513	623	629	629.5
	0.514	624.5	631	630.5
	0.515	622.5	628	629
	0.516	626	627	628
	0.517	618.5	627	626
	0.518	624.5	630.5	630.5
	0.519	620.5	633.5	626
	0.52	624	629	627.5
	0.521	625.5	629.5	626
	0.522	624	629	629
	0.523	625	630	627.5
	0.524	624.5	629	627.5
	0.525	624.5	627.5	632.5
	0.526	629.5	629.5	627.5
	0.527	623	630.5	629
	0.528	625.5	630	625
	0.529	629	628.5	627.5
	0.53	622	632	626
	0.531	626	631	624.5
	0.532	629	633.5	626
	0.533	622.5	633.5	629
	0.534	623.5	632	625
	0.535	625	632.5	628.5
	0.536	624.5	633	632
	0.537	624.5	632.5	628
	0.538	628	629.5	631
	0.539	628.5	634.5	626
	0.54	626	634.5	628
	0.541	625.5	633.5	631.5
	0.542	626	633	628
	0.543	622	635.5	629.5
	0.544	625.5	632.5	630.5
	0.545	624	636.5	626
	0.546	623.5	633.5	629
	0.547	626	635	630.5
	0.548	620	633.5	629
	0.549	625.5	634.5	631
	0.55	623.5	633	629.5
	0.551	625	630.5	630
	0.552	621	630.5	628.5
	0.553	626	632.5	629.5
	0.554	625.5	634.5	628.5
	0.555	622	636.5	632.5
	0.556	623.5	635.5	633.5
	0.557	624.5	631.5	629
	0.558	626	633	628.5
	0.559	624.5	631	629.5
	0.56	624	633.5	629
	0.561	625.5	634.5	628.5
	0.562	625.5	632.5	630
	0.563	623	632.5	630
	0.564	624.5	634.5	628
	0.565	630	633	633
	0.566	623.5	634.5	629.5
	0.567	624	636.5	631
	0.568	627.5	633	626
	0.569	630	630	632
	0.57	624.5	636	630.5
	0.571	625.5	635.5	628
	0.572	628.5	631	632.5
	0.573	625.5	633	627.5
	0.574	626.5	632.5	631.5
	0.575	629	634	631.5
	0.576	629	630	632.5
	0.577	627	635.5	633.5
	0.578	626	634	632.5
	0.579	626	634.5	633
	0.58	628	636	630.5
	0.581	625.5	634.5	632
	0.582	627.5	636	631.5
	0.583	630	634	629.5
	0.584	632.5	637	630
	0.585	631.5	634.5	632.5
	0.586	628.5	638.5	633
	0.587	630.5	633	629
	0.588	629.5	636.5	631
	0.589	633	641	632.5
	0.59	634.5	635	633
	0.591	631	635	632.5
	0.592	633.5	631	631.5
	0.593	631.5	636	629.5
	0.594	632.5	638.5	630.5
	0.595	632.5	636.5	633
	0.596	631.5	633.5	632.5
	0.597	630.5	638	633.5
	0.598	633	641	631
	0.599	632.5	639	627.5
	0.6	630.5	639.5	630.5
	0.601	634.5	637.5	629
	0.602	633	639.5	630
	0.603	631	637.5	629.5
	0.604	630	641	631.5
	0.605	630.5	639	632
	0.606	629.5	641	631.5
	0.607	631.5	641	631
	0.608	634.5	641	629.5
	0.609	631.5	643.5	633
	0.61	634	645.5	636.5
	0.611	630	646	631
	0.612	633.5	643	633.5
	0.613	631.5	645	632.5
	0.614	630	646.5	632
	0.615	632.5	647.5	625.5
	0.616	632	644.5	632
	0.617	630	645.5	633.5
	0.618	629.5	646	633.5
	0.619	631	646.5	633
	0.62	630.5	647.5	638.5
	0.621	628.5	649	632.5
	0.622	630.5	651.5	632
	0.623	630.5	648	633.5
	0.624	630.5	651	635.5
	0.625	628	650	631.5
	0.626	625.5	648	634.5
	0.627	630	650	635
	0.628	629.5	649	633.5
	0.629	628.5	649.5	633.5
	0.63	628.5	649.5	632
	0.631	631.5	649	636.5
	0.632	628	652	633.5
	0.633	626.5	649.5	637
	0.634	632	652	636
	0.635	627.5	656	639
	0.636	629.5	652.5	635.5
	0.637	629	649.5	635
	0.638	627.5	648	632.5
	0.639	626	648.5	636
	0.64	628.5	649.5	635.5
	0.641	626	650	634
	0.642	623	650.5	634
	0.643	628	650	636
	0.644	628.5	649.5	637
	0.645	626	648.5	631.5
	0.646	626	646.5	636.5
	0.647	624.5	649.5	634
	0.648	630.5	649.5	635.5
	0.649	629	648.5	635
	0.65	631	650	632
	0.651	627	646.5	634
	0.652	627.5	643.5	634.5
	0.653	628	646.5	635
	0.654	628	646	633
	0.655	626	641	631.5
	0.656	624.5	639	629.5
	0.657	627.5	640.5	633.5
	0.658	628.5	643	633.5
	0.659	628	640	631
	0.66	628	639	632
	0.661	626	638.5	632
	0.662	626	639	629.5
	0.663	628.5	638	632
	0.664	626	637	629.5
	0.665	628.5	636	633.5
	0.666	628.5	641	630.5
	0.667	625	635.5	630.5
	0.668	626	635	625.5
	0.669	626	632	633
	0.67	626	635.5	632.5
	0.671	628	632.5	628.5
	0.672	628.5	632	634.5
	0.673	625.5	632	631
	0.674	626.5	632.5	629.5
	0.675	627.5	629.5	629
	0.676	624.5	632	628
	0.677	624.5	629	628
	0.678	625.5	631	633.5
	0.679	625	628.5	629
	0.68	623.5	629	625.5
	0.681	624	630	626
	0.682	626	624.5	629.5
	0.683	624	628	629
	0.684	625.5	626	628.5
	0.685	623.5	625.5	632
	0.686	623	630	629
	0.687	621	627	626
	0.688	618.5	625	626
	0.689	623.5	630	627
	0.69	625.5	627	630.5
	0.691	623	627	631
	0.692	626	626	628
	0.693	625.5	625.5	629
	0.694	623	625.5	626
	0.695	622	625	630
	0.696	622	627.5	630
	0.697	623.5	626.5	623
	0.698	622	626	627
	0.699	623.5	626	626
	0.7	622	624	625
	0.701	621	623	627
	0.702	624.5	624.5	626.5
	0.703	623	622.5	625
	0.704	628.5	622	626
	0.705	623.5	625.5	626
	0.706	626	622	624.5
	0.707	622	623	621.5
	0.708	623.5	622.5	623
	0.709	625	623.5	622
	0.71	626	620.5	623
	0.711	625	622	623
	0.712	624.5	618	623
	0.713	626	621	630.5
	0.714	626	616.5	623.5
	0.715	627	620.5	624.5
	0.716	627	617	627
	0.717	622.5	617	622
	0.718	630	618.5	622.5
	0.719	626	617	621
	0.72	628	617.5	624.5
	0.721	629	615.5	623.5
	0.722	629	616	624.5
	0.723	629	617.5	622.5
	0.724	629.5	617	624
	0.725	631.5	611	622
	0.726	625.5	611	620.5
	0.727	626	609.5	627
	0.728	626	611	622.5
	0.729	630.5	611	622
	0.73	630.5	614.5	619.5
	0.731	629	610.5	623
	0.732	629.5	611	624.5
	0.733	632.5	608	624.5
	0.734	630	611	626
	0.735	626	611	623
	0.736	628	611	620
	0.737	631	611	624.5
	0.738	632.5	608.5	625.5
	0.739	630	608	624.5
	0.74	633.5	608.5	624
	0.741	631.5	608.5	626
	0.742	633	608.5	626
	0.743	633	608.5	627.5
	0.744	629	607.5	626
	0.745	633.5	610.5	625.5
	0.746	628.5	607	625.5
	0.747	627.5	604.5	626
	0.748	629.5	607	630
	0.749	632.5	605.5	628.5
	0.75	629	608.5	628
	0.751	630	606	627.5
	0.752	632	605	629.5
	0.753	630.5	604	630
	0.754	630.5	604	628
	0.755	629	605	626
	0.756	628.5	605	627.5
	0.757	629	604.5	628.5
	0.758	630	603.5	626
	0.759	628.5	603.5	630.5
	0.76	629.5	602.5	628
	0.761	631	608.5	629.5
	0.762	629.5	606.5	627.5
	0.763	626	608.5	629
	0.764	629	605	630
	0.765	628	607.5	630
	0.766	629	610	628
	0.767	625	606.5	628.5
	0.768	629.5	609.5	630.5
	0.769	628.5	611	633.5
	0.77	630	613	631
	0.771	626	609	630
	0.772	628.5	609	629
	0.773	625.5	611	633
	0.774	629.5	611	628.5
	0.775	629	611	631
	0.776	629.5	610.5	629
	0.777	626.5	614.5	630.5
	0.778	626	613.5	633.5
	0.779	629.5	615.5	628
	0.78	627.5	618.5	629
	0.781	626	617.5	632
	0.782	629.5	618.5	628.5
	0.783	628	618	629
	0.784	626	618.5	627.5
	0.785	628	624.5	631
	0.786	625.5	620.5	630.5
	0.787	622.5	623.5	631
	0.788	626	624.5	627.5
	0.789	629	623.5	633
	0.79	625.5	626	629
	0.791	628.5	625	629
	0.792	625.5	626	630
	0.793	626	629.5	630.5
	0.794	628.5	630	630
	0.795	624.5	626	634.5
	0.796	624	631.5	629.5
	0.797	628	633	628.5
	0.798	624	634	633.5
	0.799	626	630	631.5
	0.8	628	629	631.5
	0.801	627	629.5	632.5
	0.802	629	635.5	631
	0.803	628	635.5	630
	0.804	628	637	631
	0.805	627.5	637.5	630.5
	0.806	629	637.5	633
	0.807	628.5	637.5	630.5
	0.808	627	637.5	632
	0.809	629.5	640.5	632.5
	0.81	626	637.5	633
	0.811	628	640	636
	0.812	630	641	630.5
	0.813	628	644	633
	0.814	628	644	632.5
	0.815	630	641	632
	0.816	631	644.5	633.5
	0.817	625.5	641	636
	0.818	629	645	633.5
	0.819	630.5	647	630
	0.82	632	646.5	633
	0.821	634.5	648	634.5
	0.822	631	649.5	633.5
	0.823	632	651	634
	0.824	631.5	649.5	631
	0.825	631.5	651	632
	0.826	633	649	634
	0.827	632	649.5	634.5
	0.828	635.5	652.5	634
	0.829	632	654	633
	0.83	637	652	631
	0.831	637.5	653.5	636
	0.832	637	653	633.5
	0.833	636.5	656	631.5
	0.834	635.5	657	633
	0.835	638	653.5	635
	0.836	641	656	636
	0.837	639.5	663.5	630.5
	0.838	639.5	659.5	634.5
	0.839	636	658	631.5
	0.84	640	659	634
	0.841	639.5	663	633
	0.842	635.5	663	635.5
	0.843	641	663.5	633.5
	0.844	643.5	662	632.5
	0.845	639	664.5	629
	0.846	641	666	635
	0.847	635.5	663.5	632
	0.848	636.5	665.5	634
	0.849	641	664	629
	0.85	641	667	636.5
	0.851	641	670.5	635.5
	0.852	641	670	634
	0.853	643.5	669.5	634.5
	0.854	640	669.5	631.5
	0.855	641	674	634
	0.856	639.5	673.5	633.5
	0.857	641	673.5	631
	0.858	641	673.5	630
	0.859	641	674.5	633.5
	0.86	641	673.5	632
	0.861	639.5	675	630
	0.862	639	676	630
	0.863	638.5	677.5	628.5
	0.864	638.5	674	632
	0.865	636	677	629.5
	0.866	639.5	676.5	630.5
	0.867	638.5	676.5	628.5
	0.868	641	675.5	629
	0.869	641	680.5	626
	0.87	640.5	679.5	628.5
	0.871	639	680.5	628
	0.872	638	681	630
	0.873	638	682.5	629
	0.874	636	681.5	628
	0.875	636	680	630
	0.876	640	680.5	629
	0.877	638.5	681.5	626
	0.878	637	680.5	628
	0.879	637	682	626.5
	0.88	636	684	625
	0.881	638	685.5	626
	0.882	634	684.5	625
	0.883	637.5	685	623.5
	0.884	634.5	685.5	627
	0.885	635	685.5	624.5
	0.886	635	686.5	626
	0.887	631	690.5	624.5
	0.888	632.5	689.5	626
	0.889	634	690.5	627.5
	0.89	632	684.5	628.5
	0.891	632.5	687.5	627
	0.892	631.5	689	628
	0.893	628.5	691.5	624
	0.894	630	690	628
	0.895	627.5	688	629
	0.896	632.5	690.5	629.5
	0.897	634	693	629
	0.898	631	694.5	629
	0.899	629.5	693	631.5
	0.9	627	694.5	625.5
	0.901	633.5	694	632.5
	0.902	632.5	694.5	628
	0.903	630.5	696	629
	0.904	630.5	693.5	632
	0.905	634.5	691.5	628
	0.906	629.5	695.5	630.5
	0.907	630.5	697	632.5
	0.908	628.5	693	631
	0.909	628.5	690.5	633.5
	0.91	632.5	693.5	633.5
	0.911	629	695	630.5
	0.912	626	692	633
	0.913	628.5	689	630.5
	0.914	628.5	692.5	631.5
	0.915	626	694	631.5
	0.916	626	695.5	632
	0.917	627.5	694.5	635
	0.918	626	691.5	631.5
	0.919	623.5	691	632.5
	0.92	624.5	688	634
	0.921	625	691.5	632
	0.922	625.5	689.5	632.5
	0.923	625.5	690.5	630.5
	0.924	626	692.5	630
	0.925	620.5	692	632
	0.926	618.5	688	631.5
	0.927	624.5	694.5	634
	0.928	622.5	689	634.5
	0.929	621.5	690.5	633.5
	0.93	624.5	692	635
	0.931	620	688	632.5
	0.932	622	688.5	632
	0.933	619.5	689.5	631
	0.934	623.5	690.5	633.5
	0.935	622	685	632.5
	0.936	620	689	631
	0.937	619	683.5	631.5
	0.938	622	684	631.5
	0.939	618.5	683	628
	0.94	620.5	683.5	631
	0.941	621	683	628.5
	0.942	620.5	681.5	628.5
	0.943	617	681	629.5
	0.944	617.5	681	627.5
	0.945	616.5	678	629
	0.946	621	678	633
	0.947	617	677	630.5
	0.948	615	681	629
	0.949	617.5	676	629
	0.95	617.5	675.5	628
	0.951	616.5	674.5	628
	0.952	620	675.5	631
	0.953	620.5	671.5	628
	0.954	621.5	670.5	628.5
	0.955	622	667.5	626
	0.956	625.5	673.5	626
	0.957	619	670	629
	0.958	623	667.5	627.5
	0.959	622.5	664.5	627.5
	0.96	624.5	666	628.5
	0.961	624.5	666	626
	0.962	628.5	662.5	623.5
	0.963	628.5	663.5	626
	0.964	628.5	664.5	627
	0.965	628.5	661.5	626
	0.966	631	657.5	626
	0.967	635.5	659.5	625
	0.968	632	654	623
	0.969	632.5	655	630
	0.97	633	653	626
	0.971	631.5	650.5	623.5
	0.972	633.5	650.5	630
	0.973	634	650	629
	0.974	632.5	647.5	628
	0.975	633	648.5	628.5
	0.976	633.5	644.5	629
	0.977	633.5	641	626
	0.978	634.5	641	628.5
	0.979	632	640.5	633
	0.98	635.5	637	626
	0.981	633.5	637.5	628
	0.982	636.5	631.5	629
	0.983	633.5	632.5	626
	0.984	635	629.5	629
	0.985	633.5	629.5	631
	0.986	633.5	625.5	629.5
	0.987	631	624	626
	0.988	633.5	627.5	630.5
	0.989	636	622	631.5
	0.99	634.5	621	630
	0.991	633.5	616.5	630
	0.992	633.5	618	628
	0.993	634	613.5	631
	0.994	633.5	611	629.5
	0.995	634	608.5	630
	0.996	635	606.5	633
	0.997	636	607.5	632
	0.998	636	603.5	631
	0.999	634.5	601.5	634
	1	632.5	600	633
	1.001	630	597.5	633
	1.002	634	595	636
	1.003	631	594.5	636
	1.004	631.5	593.5	636
	1.005	632.5	588	635.5
	1.006	633.5	588	632.5
	1.007	631.5	587	636
	1.008	630	585	631.5
	1.009	633	581	632.5
	1.01	630	578.5	636
	1.011	629.5	579	635.5
	1.012	629.5	576.5	635.5
	1.013	631	575	631.5
	1.014	629.5	566.5	636
	1.015	630.5	570	636
	1.016	629	566.5	637.5
	1.017	632.5	566.5	633.5
	1.018	631	564	636
	1.019	629.5	562.5	637.5
	1.02	630.5	560.5	636
	1.021	636	555	636
	1.022	630.5	555	636.5
	1.023	631	551.5	637
	1.024	633.5	551	639
	1.025	632	549	634.5
	1.026	632	547.5	636.5
	1.027	630.5	545	636
	1.028	632	542.5	637.5
	1.029	636	538	633.5
	1.03	631.5	539.5	634
	1.031	636	534.5	637.5
	1.032	633	531.5	636.5
	1.033	635	525.5	635.5
	1.034	634	525.5	636
	1.035	632.5	521.5	637
	1.036	636	520.5	633.5
	1.037	635	520	635.5
	1.038	635.5	516	636
	1.039	634.5	516	636
	1.04	631	510.5	637
	1.041	636.5	508	632
	1.042	636.5	506	634.5
	1.043	629.5	501.5	634.5
	1.044	633	501.5	633
	1.045	632.5	497	636.5
	1.046	634.5	494.5	637
	1.047	633	489.5	635.5
	1.048	634.5	488.5	635.5
	1.049	636.5	479.5	637
	1.05	631.5	479.5	636
	1.051	634.5	479	636
	1.052	636	470.5	636.5
	1.053	634.5	466.5	632.5
	1.054	632	465	635.5
	1.055	634	462	635
	1.056	635.5	455.5	634.5
	1.057	635	452.5	636
	1.058	633.5	448.5	637
	1.059	634	449	636
	1.06	633	441	637.5
	1.061	633.5	434	634
	1.062	629.5	432	635
	1.063	634	424	633
	1.064	631	421	638.5
	1.065	633.5	417	635
	1.066	630	417	636
	1.067	633	410.5	635.5
	1.068	633	402.5	636
	1.069	635	402	636
	1.07	636	398.5	635.5
	1.071	633.5	389.5	633.5
	1.072	635.5	387	635.5
	1.073	633.5	384.5	636.5
	1.074	633	381	636.5
	1.075	631	375	638
	1.076	632.5	370	637.5
	1.077	632.5	365.5	634
	1.078	631	359.5	636.5
	1.079	630	357.5	638
	1.08	630.5	356	637
	1.081	634.5	352	636.5
	1.082	632	346.5	638.5
	1.083	633	342.5	638
	1.084	631.5	337	637.5
	1.085	632	336	639
	1.086	632.5	332.5	636
	1.087	635	328	637.5
	1.088	632	322	638.5
	1.089	633	321.5	637
	1.09	633.5	317.5	638.5
	1.091	630	315	636
	1.092	630.5	312	638.5
	1.093	631	310	636.5
	1.094	633.5	308.5	635
	1.095	630	304	638
	1.096	634	299	640.5
	1.097	632	295	633.5
	1.098	630.5	295.5	638.5
	1.099	631	292	633
	1.1	633	286.5	635
	1.101	632.5	286	634.5
	1.102	636	285	635
	1.103	633.5	278	634.5
	1.104	635.5	275	632.5
	1.105	633.5	273.5	637
	1.106	633.5	268.5	633
	1.107	636.5	268	632.5
	1.108	635.5	266.5	629.5
	1.109	633	261.5	633
	1.11	633.5	262.5	629.5
	1.111	635.5	258.5	632
	1.112	633.5	255	629
	1.113	634	252.5	629.5
	1.114	637	253	626
	1.115	635.5	248.5	626
	1.116	636	244	629.5
	1.117	638.5	241.5	629.5
	1.118	636.5	240	626
	1.119	640.5	235.5	629
	1.12	637.5	235.5	624
	1.121	641	236.5	625.5
	1.122	637.5	233.5	626
	1.123	638.5	226.5	624.5
	1.124	635	223.5	624.5
	1.125	639	225	622
	1.126	637	218.5	622
	1.127	638.5	215	623
	1.128	641	216	622
	1.129	636.5	214	621.5
	1.13	643	211.5	622.5
	1.131	640	209	622
	1.132	638.5	204.5	622.5
	1.133	640	198.5	620
	1.134	638.5	201	615
	1.135	643	198.5	619
	1.136	640	193.5	621.5
	1.137	641	193.5	618
	1.138	640.5	191	616.5
	1.139	639.5	188	619
	1.14	641	186	618.5
	1.141	641	180	616
	1.142	639	184.5	616
	1.143	641	181	616
	1.144	638	178.5	616.5
	1.145	641	176	615.5
	1.146	639	171	618
	1.147	637.5	168.5	614.5
	1.148	638.5	166.5	615
	1.149	640	164	615.5
	1.15	638.5	165.5	619
	1.151	638	164	618
	1.152	639.5	160.5	616
	1.153	638	154.5	616.5
	1.154	637	156	614.5
	1.155	639.5	151.5	616
	1.156	640	151	615
	1.157	636.5	150.5	614
	1.158	636.5	146	615
	1.159	635.5	145	613
	1.16	635.5	144.5	616
	1.161	638	143	614.5
	1.162	633	143.5	615
	1.163	637.5	140	615
	1.164	634.5	139.5	616.5
	1.165	639	138	617.5
	1.166	634.5	138.5	614
	1.167	636.5	137	615
	1.168	635.5	131.5	617.5
	1.169	633.5	134.5	616
	1.17	633.5	131	616
	1.171	634	131.5	617
	1.172	635.5	131	615.5
	1.173	634.5	124.5	614
	1.174	636	129.5	617.5
	1.175	634	123.5	617
	1.176	633.5	126.5	619.5
	1.177	633.5	126.5	616
	1.178	631	126	616.5
	1.179	634	127	615.5
	1.18	631	120	618.5
	1.181	633.5	121	617.5
	1.182	634.5	120.5	620.5
	1.183	629	121	615.5
	1.184	632	121.5	621
	1.185	635.5	116	622.5
	1.186	635.5	118	620
	1.187	631.5	118	620
	1.188	631.5	119	619.5
	1.189	631	118	617.5
	1.19	633.5	117	620.5
	1.191	634	120.5	619
	1.192	633.5	117.5	619.5
	1.193	632	118	620.5
	1.194	634	116.5	621.5
	1.195	635.5	116.5	624
	1.196	635	117.5	624
	1.197	634.5	117.5	621
	1.198	635	116.5	623
	1.199	633	113.5	621.5
	1.2	633.5	119	623
	1.201	632.5	119	622.5
	1.202	634	120.5	623
	1.203	633	121	626
	1.204	633.5	119.5	624
	1.205	632	120.5	622
	1.206	634	123	625.5
	1.207	636	122.5	625
	1.208	633	128.5	626
	1.209	635.5	127	630
	1.21	633	126.5	629
	1.211	632	129.5	628
	1.212	635.5	130	629
	1.213	633.5	129.5	625
	1.214	634.5	131	628.5
	1.215	633	136	630
	1.216	631	137.5	627
	1.217	637	141.5	628.5
	1.218	633	143.5	630
	1.219	637.5	145.5	629.5
	1.22	634	151	626
	1.221	634	157.5	627.5
	1.222	636.5	154.5	629
	1.223	635.5	159.5	627.5
	1.224	636.5	162.5	628.5
	1.225	636	170	627.5
	1.226	635	175.5	626
	1.227	634	176	629.5
	1.228	635	180.5	628
	1.229	634.5	187	629
	1.23	632.5	193.5	629.5
	1.231	634	198.5	628.5
	1.232	634.5	203	628
	1.233	635	208	627.5
	1.234	640	212.5	630
	1.235	634.5	219.5	629.5
	1.236	639.5	227	627.5
	1.237	633.5	233.5	631.5
	1.238	637.5	237	625
	1.239	639.5	242	629.5
	1.24	637	249.5	629
	1.241	637	254.5	630
	1.242	637.5	258	629.5
	1.243	635.5	268	628.5
	1.244	639	270.5	627.5
	1.245	635.5	274.5	631
	1.246	634.5	276.5	629.5
	1.247	638	284	630.5
	1.248	637.5	288.5	631
	1.249	641	292	629.5
	1.25	638	298	626
	1.251	636	301	629
	1.252	641	309	629
	1.253	636.5	315	627
	1.254	636.5	321.5	633
	1.255	635.5	327	628.5
	1.256	640	334	628
	1.257	639	337.5	630.5
	1.258	639.5	345	631.5
	1.259	640.5	355	630.5
	1.26	641	360.5	633.5
	1.261	638.5	368	629.5
	1.262	638	381.5	626
	1.263	638	384	631.5
	1.264	641	393.5	631
	1.265	640.5	402	638
	1.266	640	408	628
	1.267	641	413.5	633
	1.268	641	419.5	632
	1.269	640.5	427.5	634.5
	1.27	641	435	632.5
	1.271	644	437.5	635
	1.272	641	443.5	635.5
	1.273	643.5	449.5	634
	1.274	646	456	633.5
	1.275	647	455	634.5
	1.276	645	458	631
	1.277	650.5	460.5	634.5
	1.278	647.5	465	634.5
	1.279	647	467.5	634
	1.28	649.5	473	632.5
	1.281	644.5	473	632
	1.282	649.5	478.5	639.5
	1.283	648.5	476	638.5
	1.284	646	484	638
	1.285	648.5	484.5	641
	1.286	649.5	487	637
	1.287	650	490.5	641
	1.288	649	489	636
	1.289	648.5	492	636
	1.29	647	493	639.5
	1.291	651	495.5	637
	1.292	649.5	498	643.5
	1.293	651.5	507.5	636
	1.294	650	509.5	640.5
	1.295	649.5	511.5	641
	1.296	650	517.5	643
	1.297	651.5	526.5	643.5
	1.298	652	529	641
	1.299	649.5	541	641
	1.3	647	545	641
	1.301	651	556	641
	1.302	649	565	644.5
	1.303	654.5	575.5	641
	1.304	653.5	584.5	640
	1.305	652	594	643.5
	1.306	649.5	604	649.5
	1.307	649.5	615.5	641
	1.308	653	631	643.5
	1.309	652.5	638	641
	1.31	651.5	651	641
	1.311	651.5	662.5	644.5
	1.312	650	670.5	645.5
	1.313	649.5	684	645.5
	1.314	654.5	695	647.5
	1.315	652.5	710	647.5
	1.316	651.5	724	649.5
	1.317	651.5	735	644.5
	1.318	654	743.5	646
	1.319	648	758.5	645.5
	1.32	649.5	766.5	647
	1.321	653.5	780.5	648.5
	1.322	650.5	789	644.5
	1.323	650.5	795.5	641
	1.324	652	806	644.5
	1.325	652.5	816	647
	1.326	655.5	827.5	647
	1.327	649.5	833.5	644.5
	1.328	649.5	841	647
	1.329	646	848	648.5
	1.33	651	858	645.5
	1.331	647	862	643
	1.332	649.5	869.5	647.5
	1.333	650	872	643
	1.334	650	879.5	648.5
	1.335	650	882.5	643
	1.336	649	887.5	645
	1.337	644.5	889	641
	1.338	645	898	647
	1.339	646	899.5	643
	1.34	648	899	640.5
	1.341	643.5	905.5	644
	1.342	643	909	641
	1.343	641	909	641
	1.344	646	913	641
	1.345	644.5	916.5	641
	1.346	644.5	919.5	640
	1.347	645	921.5	644.5
	1.348	644.5	926.5	646.5
	1.349	640	932.5	643.5
	1.35	643	933	641
	1.351	643	939	643
	1.352	643.5	946	643.5
	1.353	643.5	950	641
	1.354	644.5	954	643.5
	1.355	643	959.5	641
	1.356	644.5	963	641
	1.357	645.5	967	644
	1.358	644.5	975	640
	1.359	643	976.5	638.5
	1.36	641	980	640
	1.361	643	987.5	641
	1.362	641	991.5	643.5
	1.363	641	996	640
	1.364	643.5	998.5	644.5
	1.365	641	1005	641
	1.366	641	1011	643
	1.367	643.5	1013.5	640.5
	1.368	640.5	1015.5	641
	1.369	643.5	1021.5	640
	1.37	643.5	1028.5	641
	1.371	641	1028.5	641
	1.372	641	1034.5	640
	1.373	644.5	1035.5	641
	1.374	644.5	1047	641
	1.375	641	1046.5	645
	1.376	643	1051	641
	1.377	641	1053	641
	1.378	638.5	1058.5	641
	1.379	643	1067	643.5
	1.38	645.5	1067	645
	1.381	644	1072	643.5
	1.382	641	1076.5	643
	1.383	645	1083	640.5
	1.384	645	1086	644
	1.385	644	1088	640
	1.386	646.5	1094.5	641
	1.387	646	1098	640
	1.388	641	1101	644
	1.389	644.5	1105.5	641
	1.39	640.5	1111	643.5
	1.391	641	1113.5	644.5
	1.392	641	1118	643.5
	1.393	640.5	1118	641
	1.394	644.5	1125.5	641
	1.395	643	1133	641
	1.396	639	1130.5	643
	1.397	640	1138	641
	1.398	641	1140	644
	1.399	641	1141	641
	1.4	641	1148	644
	1.401	640	1150	638.5
	1.402	641	1158.5	639.5
	1.403	641	1162.5	639.5
	1.404	641	1165.5	636.5
	1.405	639.5	1171.5	639.5
	1.406	639.5	1174	641
	1.407	641	1176.5	636
	1.408	641	1177.5	636
	1.409	641	1185	636
	1.41	639.5	1190	639
	1.411	639	1192.5	636
	1.412	638.5	1198	633.5
	1.413	641	1199.5	641
	1.414	640.5	1203	633
	1.415	633.5	1207	636
	1.416	635.5	1207.5	633.5
	1.417	636	1212	632.5
	1.418	631	1216.5	633.5
	1.419	632	1221.5	634
	1.42	630.5	1227	633.5
	1.421	632	1232.5	631.5
	1.422	628.5	1232.5	631
	1.423	627	1237.5	631
	1.424	625.5	1244.5	632.5
	1.425	623	1247.5	627.5
	1.426	625.5	1257.5	631
	1.427	622	1255	631
	1.428	624	1264.5	629.5
	1.429	617	1270.5	628
	1.43	618	1271.5	631
	1.431	619	1281.5	629.5
	1.432	611	1282	629
	1.433	611	1288.5	629
	1.434	611	1292.5	629.5
	1.435	607.5	1297	626
	1.436	607	1302.5	629
	1.437	605.5	1304	628
	1.438	602	1316	626
	1.439	601.5	1315	629
	1.44	601	1316.5	629
	1.441	596	1325	628.5
	1.442	596	1325.5	629
	1.443	589.5	1333	626
	1.444	590.5	1338.5	627.5
	1.445	586.5	1341.5	629.5
	1.446	581	1347.5	629.5
	1.447	581	1354	631
	1.448	581	1356.5	627.5
	1.449	575.5	1361	632
	1.45	569	1369	628.5
	1.451	572.5	1369	630.5
	1.452	567.5	1381.5	629.5
	1.453	563	1382	630
	1.454	562	1386.5	629
	1.455	561.5	1390	630
	1.456	557.5	1397	632
	1.457	551.5	1406.5	630.5
	1.458	551	1405	632.5
	1.459	551.5	1412.5	635
	1.46	543.5	1412	630.5
	1.461	540.5	1416	631.5
	1.462	539	1416	635
	1.463	534	1422.5	633.5
	1.464	533.5	1427.5	631.5
	1.465	532	1429	631.5
	1.466	524.5	1431	633
	1.467	527	1435.5	632.5
	1.468	523.5	1439	634
	1.469	520	1436.5	634
	1.47	514	1445	637
	1.471	512.5	1441.5	633.5
	1.472	509.5	1446	637.5
	1.473	508.5	1446	637
	1.474	504	1446	636
	1.475	498.5	1451	639
	1.476	494.5	1455	636
	1.477	492.5	1456	636.5
	1.478	489	1461	636.5
	1.479	482.5	1458	636
	1.48	482	1461	640
	1.481	478.5	1461	640
	1.482	473	1461	643
	1.483	471	1469.5	641
	1.484	467.5	1467.5	643
	1.485	460	1470	641
	1.486	460.5	1467.5	641
	1.487	453.5	1470.5	641
	1.488	451	1469.5	641
	1.489	447	1475	643.5
	1.49	443.5	1473.5	644.5
	1.491	438	1471.5	641
	1.492	434	1472	643
	1.493	435	1471	641
	1.494	427	1468.5	644.5
	1.495	424.5	1469.5	647
	1.496	420	1468.5	644.5
	1.497	417	1465.5	645
	1.498	417	1466.5	647.5
	1.499	410	1465	649
	1.5	407	1461	651
	1.501	401.5	1459.5	649.5
	1.502	404	1458	648
	1.503	398.5	1455.5	649.5
	1.504	396.5	1455	645
	1.505	394	1446	644
	1.506	390.5	1451	651.5
	1.507	387	1450	649.5
	1.508	381.5	1446	650.5
	1.509	382	1444.5	649.5
	1.51	380	1443	646
	1.511	378.5	1440.5	649.5
	1.512	372.5	1438	648
	1.513	374.5	1436	649.5
	1.514	369.5	1434.5	649
	1.515	369	1430	647
	1.516	368	1429.5	647.5
	1.517	365	1426.5	649.5
	1.518	361.5	1421.5	652
	1.519	360	1414	646.5
	1.52	355.5	1414	647
	1.521	354	1408.5	649
	1.522	352.5	1401.5	646.5
	1.523	348	1401.5	645.5
	1.524	346.5	1400.5	646.5
	1.525	344	1394	649.5
	1.526	342	1386.5	644.5
	1.527	339	1386.5	646.5
	1.528	333.5	1379.5	645.5
	1.529	331.5	1376.5	641
	1.53	329.5	1371.5	643
	1.531	325	1368.5	643.5
	1.532	323	1361.5	641
	1.533	318.5	1356.5	641
	1.534	314.5	1356.5	641
	1.535	311.5	1356.5	641
	1.536	302.5	1348	643
	1.537	307.5	1346.5	641
	1.538	306.5	1347.5	641
	1.539	299	1340	641
	1.54	296.5	1336	639.5
	1.541	290.5	1336	638
	1.542	288	1327	639
	1.543	284	1325.5	640
	1.544	279.5	1324	639
	1.545	277.5	1321	637.5
	1.546	271.5	1319.5	637
	1.547	270.5	1314.5	638
	1.548	263.5	1310	635.5
	1.549	262.5	1309.5	636
	1.55	258	1306.5	636
	1.551	254.5	1304.5	631.5
	1.552	246.5	1297	626
	1.553	246	1297	632.5
	1.554	242.5	1297	626
	1.555	238	1291.5	625.5
	1.556	234	1292.5	625
	1.557	232.5	1291	624.5
	1.558	227.5	1287	621
	1.559	222.5	1285.5	617
	1.56	221.5	1281.5	619
	1.561	219.5	1280.5	617
	1.562	213	1277.5	615.5
	1.563	209.5	1279	611
	1.564	208	1273.5	608.5
	1.565	204	1272.5	610
	1.566	200.5	1274.5	607
	1.567	196	1270.5	598.5
	1.568	194	1269.5	599
	1.569	190	1266	596
	1.57	185.5	1266.5	592.5
	1.571	184	1265.5	591
	1.572	182.5	1267	589.5
	1.573	177.5	1267	584.5
	1.574	177	1265.5	577.5
	1.575	174	1265.5	573.5
	1.576	175	1267	574.5
	1.577	167	1270.5	565.5
	1.578	168	1267	560.5
	1.579	165	1272.5	557.5
	1.58	165	1276.5	557
	1.581	164	1279.5	551
	1.582	161.5	1279.5	546.5
	1.583	158	1282	545
	1.584	157	1281.5	536.5
	1.585	155	1286	534.5
	1.586	153.5	1287.5	531
	1.587	156	1288	524.5
	1.588	153.5	1286	519.5
	1.589	150	1290.5	513
	1.59	146	1292.5	512
	1.591	154	1295	507.5
	1.592	150	1295	500
	1.593	146	1297	494.5
	1.594	149.5	1297	491
	1.595	148.5	1302	485.5
	1.596	147.5	1307.5	482
	1.597	149	1311.5	475.5
	1.598	144.5	1312	466
	1.599	151	1322	465
	1.6	150.5	1319.5	455
	1.601	149.5	1323	453.5
	1.602	155.5	1327	447
	1.603	156	1335	439
	1.604	152.5	1333	433.5
	1.605	157	1340.5	428.5
	1.606	156	1341.5	419.5
	1.607	159	1344	416
	1.608	158	1349	408.5
	1.609	162	1349.5	407
	1.61	161	1354	397.5
	1.611	164	1356.5	390.5
	1.612	162.5	1361.5	388.5
	1.613	165	1365.5	377
	1.614	166.5	1368	374.5
	1.615	168	1369.5	368.5
	1.616	169	1378	361.5
	1.617	174	1379	354
	1.618	169.5	1382	349
	1.619	175.5	1383	344.5
	1.62	176	1388.5	337
	1.621	178	1390	331.5
	1.622	184	1396	325.5
	1.623	182	1397.5	321.5
	1.624	183	1401.5	314.5
	1.625	187	1404.5	310
	1.626	186.5	1405	307
	1.627	193	1407.5	300
	1.628	194.5	1411	297
	1.629	194.5	1414	289.5
	1.63	194.5	1416	287
	1.631	198.5	1422	282
	1.632	198	1424.5	280
	1.633	198.5	1428	273.5
	1.634	206	1428	269.5
	1.635	203.5	1435.5	263.5
	1.636	206	1437.5	258
	1.637	210	1436.5	259.5
	1.638	212	1438	249.5
	1.639	214	1445	246.5
	1.64	214	1445	245
	1.641	218	1450.5	235.5
	1.642	222	1451.5	236
	1.643	225	1452	227.5
	1.644	228	1458	225.5
	1.645	228.5	1461	219
	1.646	234.5	1461	216
	1.647	239	1464	212
	1.648	240.5	1467.5	210.5
	1.649	238	1470.5	204
	1.65	245	1473	200.5
	1.651	249	1476	197.5
	1.652	253	1476	192.5
	1.653	253	1476	186.5
	1.654	256.5	1482	182
	1.655	260	1484	181
	1.656	266.5	1486	182.5
	1.657	271.5	1487	174
	1.658	272	1491	168.5
	1.659	278.5	1491	170.5
	1.66	281	1494	165
	1.661	288	1491	160
	1.662	292.5	1490.5	162.5
	1.663	296	1496	157
	1.664	298	1497.5	149
	1.665	305.5	1500.5	148
	1.666	307.5	1504	143
	1.667	312	1509.5	141.5
	1.668	315.5	1505	139
	1.669	320.5	1505.5	135.5
	1.67	324	1503.5	135
	1.671	330.5	1504.5	129
	1.672	335	1505.5	128
	1.673	338	1504	125
	1.674	344.5	1501	123.5
	1.675	347	1500	122
	1.676	350	1499.5	116
	1.677	358	1499.5	116
	1.678	362.5	1495	113
	1.679	366	1491	112.5
	1.68	370.5	1488.5	109
	1.681	375	1489	104.5
	1.682	387.5	1484	103
	1.683	390.5	1485.5	101.5
	1.684	392.5	1476	102.5
	1.685	398.5	1476	100.5
	1.686	401.5	1472.5	94.5
	1.687	412.5	1469.5	90
	1.688	414.5	1464.5	90
	1.689	419.5	1459.5	89
	1.69	429.5	1455.5	85.5
	1.691	435	1452	85
	1.692	441	1442.5	82
	1.693	450	1437.5	78.5
	1.694	456	1429.5	76
	1.695	461.5	1416	78.5
	1.696	471	1412.5	73
	1.697	478.5	1405	74
	1.698	483	1395.5	73.5
	1.699	490.5	1386	68
	1.7	494.5	1378	69.5
	1.701	500	1368	65
	1.702	512	1356.5	65.5
	1.703	514	1346	60
	1.704	521.5	1333	61
	1.705	530	1319	60.5
	1.706	533.5	1303	59.5
	1.707	542	1287.5	57
	1.708	548	1272.5	52
	1.709	554	1259	52
	1.71	559.5	1244.5	51
	1.711	564	1229	50
	1.712	573	1207.5	48
	1.713	580	1190	45.5
	1.714	581	1170.5	47.5
	1.715	589	1151.5	44
	1.716	594.5	1130	44.5
	1.717	605	1106.5	42
	1.718	608	1086	45.5
	1.719	614	1064.5	37
	1.72	617.5	1041	39
	1.721	626	1018	41
	1.722	632.5	990.5	39
	1.723	640	964.5	37
	1.724	650	933.5	36.5
	1.725	653.5	909.5	37
	1.726	663.5	879.5	38
	1.727	670	849.5	36
	1.728	674.5	820	34.5
	1.729	682.5	790	34
	1.73	689	759	34
	1.731	697	725	35.5
	1.732	700.5	693	38
	1.733	709	653	33.5
	1.734	715.5	622.5	35
	1.735	728.5	587	36
	1.736	730.5	547.5	34
	1.737	740.5	512.5	38.5
	1.738	748	473	38
	1.739	751.5	431.5	38.5
	1.74	758.5	392	38.5
	1.741	763.5	354.5	39.5
	1.742	771	320	42
	1.743	777	282	39.5
	1.744	782.5	246	39
	1.745	792	208.5	46
	1.746	800.5	176.5	40
	1.747	802	150	44.5
	1.748	809	120	45
	1.749	814.5	98.5	46.5
	1.75	820	74.5	50
	1.751	827.5	57.5	53
	1.752	838	43.5	52
	1.753	844.5	31	56
	1.754	848	22	55.5
	1.755	857	13.5	60.5
	1.756	861.5	2.5	59.5
	1.757	871.5	2	65
	1.758	872.5	-4.5	64.5
	1.759	883	-9.5	68
	1.76	888	-10	69
	1.761	894.5	-13.5	70.5
	1.762	896	-9.5	72
	1.763	905.5	-16.5	79.5
	1.764	904.5	-11	81
	1.765	912.5	-9	84.5
	1.766	913.5	-5.5	88.5
	1.767	921.5	-2	92.5
	1.768	924	-3.5	93.5
	1.769	931	0	97.5
	1.77	934	0	103
	1.771	939	0	105.5
	1.772	939	-1	107.5
	1.773	942.5	0	113.5
	1.774	947	4	112.5
	1.775	951	-4	122.5
	1.776	954	-2	123
	1.777	959	-0.5	128.5
	1.778	962.5	0	130
	1.779	964	-1	138.5
	1.78	965.5	-2.5	141.5
	1.781	971.5	-0.5	147
	1.782	972.5	-3.5	152.5
	1.783	976	-2.5	159
	1.784	981	-1.5	165
	1.785	981.5	-9	173.5
	1.786	987	-1.5	177
	1.787	989.5	-4	185
	1.788	995	-3.5	197.5
	1.789	996	-8	206.5
	1.79	998.5	-4.5	213
	1.791	998.5	-3.5	225.5
	1.792	1005.5	-1.5	233.5
	1.793	1013	-4	247.5
	1.794	1016	1.5	262.5
	1.795	1017	-1	276.5
	1.796	1024	-3	287.5
	1.797	1024.5	5	299.5
	1.798	1030	2.5	313
	1.799	1033	-4	328
	1.8	1038.5	-0.5	348.5
	1.801	1040.5	-1.5	364
	1.802	1043.5	-0.5	382.5
	1.803	1046	-4.5	392
	1.804	1050	-3.5	409
	1.805	1054	1	424
	1.806	1058.5	0	438.5
	1.807	1058.5	-1	451
	1.808	1065.5	-5	464.5
	1.809	1067.5	2	479
	1.81	1073.5	-3.5	488.5
	1.811	1079.5	0.5	498.5
	1.812	1082	-5.5	508
	1.813	1084	-5	513
	1.814	1088	-2	519
	1.815	1094.5	0	525.5
	1.816	1097.5	-3	531
	1.817	1100	-1	533.5
	1.818	1098	-2	539.5
	1.819	1106	-1	541.5
	1.82	1107.5	-1	540.5
	1.821	1111	0	545
	1.822	1114	-4	546
	1.823	1114	0	547.5
	1.824	1117	-2.5	551
	1.825	1118	-1	545.5
	1.826	1118	-2	546.5
	1.827	1118	-1.5	546.5
	1.828	1125	0	546.5
	1.829	1124	0	549.5
	1.83	1128	-1.5	549.5
	1.831	1130	0	550.5
	1.832	1133	-1.5	553
	1.833	1135.5	-3.5	554.5
	1.834	1138	-4	557.5
	1.835	1140.5	-1.5	562
	1.836	1142	-3	572.5
	1.837	1142	-2	573
	1.838	1144	-2	576
	1.839	1148	-1.5	587
	1.84	1149	-2.5	588
	1.841	1149.5	-1	598.5
	1.842	1152	0	601.5
	1.843	1152.5	-4.5	611
	1.844	1159	-2	618.5
	1.845	1158	-1	627.5
	1.846	1159.5	-4	635.5
	1.847	1162.5	-4.5	646
	1.848	1164.5	-3	652.5
	1.849	1165.5	-2	663.5
	1.85	1166.5	-1	676
	1.851	1171.5	-1.5	683.5
	1.852	1174	1	696
	1.853	1172	0	707.5
	1.854	1177.5	0	718.5
	1.855	1181.5	-3	732
	1.856	1183	-3	742.5
	1.857	1186	0	759
	1.858	1190	0	770.5
	1.859	1192.5	-2	785
	1.86	1197.5	-2.5	797.5
	1.861	1202.5	-4	813.5
	1.862	1205.5	-1.5	827.5
	1.863	1204.5	-2.5	844
	1.864	1213	-2	858.5
	1.865	1218.5	-0.5	875
	1.866	1225	1	885.5
	1.867	1229.5	-3	901
	1.868	1234	-1	919
	1.869	1236.5	-2.5	935
	1.87	1244.5	0.5	946
	1.871	1250	-4	962.5
	1.872	1255.5	-4	975
	1.873	1259	0.5	994.5
	1.874	1264	-3	1002.5
	1.875	1271	0	1019
	1.876	1274	0	1032.5
	1.877	1277.5	0	1043.5
	1.878	1282	-1	1055.5
	1.879	1290.5	-2.5	1070
	1.88	1294.5	-1	1081.5
	1.881	1297	-2	1095.5
	1.882	1297	-3	1101.5
	1.883	1305.5	-2	1110.5
	1.884	1306.5	-0.5	1124.5
	1.885	1312	-1.5	1138
	1.886	1312	-4	1147.5
	1.887	1316.5	1	1159.5
	1.888	1319	-5	1169.5
	1.889	1325	0	1176
	1.89	1325	-0.5	1188.5
	1.891	1333.5	-1.5	1196
	1.892	1334	-0.5	1207.5
	1.893	1336	-4	1222
	1.894	1338	0.5	1234
	1.895	1341.5	0	1237.5
	1.896	1349	-2.5	1246.5
	1.897	1347	0	1255.5
	1.898	1348	-2	1263.5
	1.899	1351.5	-2	1275
	1.9	1354	-1.5	1274.5
	1.901	1355.5	-1	1282
	1.902	1356.5	0.5	1290
	1.903	1356.5	0	1293
	1.904	1356.5	2.5	1295
	1.905	1356.5	-0.5	1293.5
	1.906	1356.5	-2	1297
	1.907	1356.5	-4.5	1304
	1.908	1361	-0.5	1308
	1.909	1366	0	1306
	1.91	1361	-3	1309.5
	1.911	1364	0	1312
	1.912	1363.5	-4	1312
	1.913	1366	-2.5	1317
	1.914	1365	-3.5	1320.5
	1.915	1365.5	0.5	1320
	1.916	1367	-4	1326
	1.917	1364	0.5	1327
	1.918	1368	0	1333.5
	1.919	1369.5	-2.5	1341.5
	1.92	1364.5	-3	1344.5
	1.921	1371.5	-1.5	1350.5
	1.922	1369.5	-0.5	1356.5
	1.923	1371.5	-1.5	1356.5
	1.924	1371.5	-3	1368.5
	1.925	1374	-1	1375
	1.926	1371.5	-1	1381.5
	1.927	1371	-1.5	1391.5
	1.928	1371	-1.5	1398.5
	1.929	1371.5	-1	1403.5
	1.93	1371.5	-4	1410
	1.931	1369	-4.5	1416
	1.932	1368.5	0	1428.5
	1.933	1371.5	-1.5	1433.5
	1.934	1371.5	-1.5	1437.5
	1.935	1375	1	1446
	1.936	1370	-1	1456.5
	1.937	1375	-3	1461
	1.938	1371.5	-0.5	1467
	1.939	1371.5	-3	1472.5
	1.94	1374	0	1476
	1.941	1371.5	-1.5	1485.5
	1.942	1371.5	-3	1486
	1.943	1371.5	-2	1499
	1.944	1371.5	-1.5	1500.5
	1.945	1371.5	-2.5	1507.5
	1.946	1375	-1	1513
	1.947	1371.5	-2	1520.5
	1.948	1371.5	-2.5	1520.5
	1.949	1376	-0.5	1533
	1.95	1375	-0.5	1532
	1.951	1371.5	-1.5	1535.5
	1.952	1370.5	-1	1545
	1.953	1371	-2.5	1549.5
	1.954	1371.5	-2	1550.5
	1.955	1374.5	0	1559
	1.956	1371.5	0	1558
	1.957	1369.5	-4	1557.5
	1.958	1370	-1.5	1562
	1.959	1371.5	0.5	1563.5
	1.96	1371.5	-4	1565.5
	1.961	1370	-5	1565.5
	1.962	1367.5	-3	1573
	1.963	1366	0	1565.5
	1.964	1369	-3	1572
	1.965	1363	-0.5	1574.5
	1.966	1363.5	-1	1565.5
	1.967	1363	-2.5	1573
	1.968	1364	-1.5	1571
	1.969	1362.5	0.5	1573.5
	1.97	1361.5	0	1565.5
	1.971	1363	-1	1565.5
	1.972	1363.5	-0.5	1572.5
	1.973	1356.5	0	1565.5
	1.974	1364	-2.5	1565.5
	1.975	1365.5	-1	1565.5
	1.976	1363	-5.5	1572
	1.977	1367	-1.5	1572.5
	1.978	1366	-1	1565.5
	1.979	1366	-3.5	1572
	1.98	1367.5	-4.5	1565.5
	1.981	1364.5	-3	1572.5
	1.982	1366.5	-0.5	1565.5
	1.983	1370	-4	1565.5
	1.984	1367	-1.5	1565.5
	1.985	1367	-2.5	1576
	1.986	1369	-2.5	1573
	1.987	1371.5	-1.5	1574
	1.988	1367.5	-4	1576
	1.989	1369	-3	1573
	1.99	1366	-1.5	1578
	1.991	1366	2	1576.5
	1.992	1368.5	-2	1573.5
	1.993	1368.5	-1	1576
[truncated: 6,006 more rows]

## Sheet: E
DataTypeVer2.0	Time	Fz	Fz	Fz
NumberOfData		15000	15000	15000
PreTriggerData		0	0	0
SamplingTime[ms]		1	1	1
DataLabel		AH1:CMJ	AH2:CMJ	AH3:CMJ
DataUnit	sec	N	N	N
	0	690.5	689.5	685.5
	0.001	691	689.5	684.5
	0.002	693	689.5	689.5
	0.003	689	688.5	684.5
	0.004	685.5	689	690.5
	0.005	689.5	687	682.5
	0.006	688.5	690	685
	0.007	685.5	690	684.5
	0.008	690.5	688.5	686
	0.009	691.5	690	682.5
	0.01	687	690	683
	0.011	686.5	690.5	685
	0.012	686.5	687.5	685
	0.013	686	691	686.5
	0.014	692	689.5	687.5
	0.015	689	689.5	688
	0.016	688.5	689	684
	0.017	688	690.5	686
	0.018	686.5	690.5	685
	0.019	690.5	686.5	685.5
	0.02	690	691	683.5
	0.021	686.5	686.5	688.5
	0.022	691.5	690.5	687
	0.023	687.5	690.5	684
	0.024	687.5	690.5	684
	0.025	689	690.5	684.5
	0.026	687	692	687
	0.027	687	690.5	689.5
	0.028	688	692	689.5
	0.029	688.5	691.5	688.5
	0.03	687.5	692	689
	0.031	690	691	685.5
	0.032	688	692.5	687.5
	0.033	690.5	688.5	684.5
	0.034	686	691	688
	0.035	691.5	690.5	688
	0.036	691.5	691	689
	0.037	690.5	691	687
	0.038	689.5	689	690.5
	0.039	687.5	692.5	691
	0.04	690.5	693	686.5
	0.041	688.5	688	686
	0.042	691.5	691.5	687.5
	0.043	690.5	694.5	689
	0.044	689	689.5	688.5
	0.045	690.5	687	687
	0.046	692	690.5	688
	0.047	690.5	690.5	688.5
	0.048	691.5	689.5	691
	0.049	691	690.5	691
	0.05	690	691	688
	0.051	692.5	692.5	690.5
	0.052	693.5	692	689
	0.053	694	690.5	686
	0.054	693	689.5	686.5
	0.055	692.5	691.5	686.5
	0.056	693	693	689.5
	0.057	693	693	688.5
	0.058	691.5	690.5	686.5
	0.059	691.5	693	687.5
	0.06	693	691	688.5
	0.061	695	690.5	687.5
	0.062	692	688.5	690.5
	0.063	692.5	694.5	689
	0.064	693	691.5	690.5
	0.065	692	691.5	687.5
	0.066	691.5	688	692.5
	0.067	691.5	691	689.5
	0.068	690.5	690.5	687.5
	0.069	689.5	690.5	689.5
	0.07	692	690	691
	0.071	694.5	690.5	691
	0.072	690.5	693	690.5
	0.073	692.5	687.5	689
	0.074	694.5	692	690.5
	0.075	690.5	692.5	686.5
	0.076	691.5	692.5	690
	0.077	694	690.5	687.5
	0.078	692.5	692	691.5
	0.079	689.5	690.5	692.5
	0.08	694	689	691
	0.081	693	691	688.5
	0.082	694.5	689.5	690.5
	0.083	692.5	687.5	691.5
	0.084	693	686.5	688.5
	0.085	692	691.5	689
	0.086	691	690.5	693
	0.087	691.5	689.5	688.5
	0.088	690.5	688.5	689.5
	0.089	691	685.5	690
	0.09	690.5	686.5	691.5
	0.091	690	689.5	690.5
	0.092	690.5	689.5	688.5
	0.093	691	686	692
	0.094	689.5	685.5	686
	0.095	690	687	692
	0.096	693	688	693
	0.097	689.5	686.5	690
	0.098	689	688	691.5
	0.099	692	689.5	689.5
	0.1	691	685.5	689
	0.101	690	690.5	689.5
	0.102	689.5	687.5	688.5
	0.103	691.5	684.5	689.5
	0.104	688	685.5	688.5
	0.105	690	690.5	685.5
	0.106	689.5	688.5	689
	0.107	690	687.5	686.5
	0.108	690.5	686.5	685.5
	0.109	691.5	688.5	687.5
	0.11	688.5	685.5	687.5
	0.111	688.5	685.5	686.5
	0.112	689.5	689.5	688.5
	0.113	689.5	687	689
	0.114	687.5	688.5	690.5
	0.115	689	685	685
	0.116	689	688.5	686.5
	0.117	688.5	689.5	684
	0.118	686	688.5	688.5
	0.119	689.5	684	685
	0.12	686.5	687.5	683.5
	0.121	684	689	685.5
	0.122	687	688	685
	0.123	688.5	689.5	684.5
	0.124	688.5	689	690.5
	0.125	684	684	686.5
	0.126	686	689.5	684
	0.127	688	688.5	686.5
	0.128	685	685.5	686
	0.129	689.5	690.5	685.5
	0.13	687	686	684
	0.131	685.5	685	685.5
	0.132	689.5	686	683
	0.133	687	687.5	687
	0.134	688.5	688	683.5
	0.135	687.5	690.5	686.5
	0.136	685.5	688.5	687
	0.137	687.5	688	684.5
	0.138	686	689.5	685.5
	0.139	681	690	685.5
	0.14	687.5	690.5	687
	0.141	684	687	687.5
	0.142	685	685	687.5
	0.143	684	689.5	684.5
	0.144	685.5	688.5	686
	0.145	687.5	690	682.5
	0.146	685	686	684
	0.147	688	689.5	688.5
	0.148	687.5	686.5	684.5
	0.149	686.5	688.5	684
	0.15	687.5	684	686.5
	0.151	685.5	688	685
	0.152	685	687.5	686
	0.153	688	689.5	684
	0.154	689	689.5	685
	0.155	684	690.5	687
	0.156	687	688.5	686.5
	0.157	687.5	691	685.5
	0.158	685	691.5	685
	0.159	689	692.5	683.5
	0.16	683	692	689
	0.161	688	692	686.5
	0.162	687.5	692	685.5
	0.163	686.5	693	684.5
	0.164	687	690.5	684
	0.165	686.5	689.5	684.5
	0.166	685	687.5	687.5
	0.167	687.5	690	686
	0.168	688	691	686.5
	0.169	689	692.5	685
	0.17	689.5	691.5	684.5
	0.171	685	687.5	688
	0.172	687.5	690.5	687.5
	0.173	687.5	687.5	686.5
	0.174	687.5	689.5	687.5
	0.175	689	692.5	684.5
	0.176	689.5	691.5	684.5
	0.177	689	693.5	686.5
	0.178	690.5	693	687.5
	0.179	687	693	689.5
	0.18	691	693	687
	0.181	686.5	689.5	689.5
	0.182	688	691.5	688
	0.183	691	692.5	687.5
	0.184	690	693	690.5
	0.185	687.5	688.5	687
	0.186	688	692.5	683.5
	0.187	687	692	688.5
	0.188	688.5	691	688
	0.189	690	692.5	689.5
	0.19	684.5	693	691.5
	0.191	685	691.5	689.5
	0.192	686.5	690.5	690.5
	0.193	688	693	691
	0.194	688	693	692
	0.195	689.5	690	691
	0.196	690	688.5	688.5
	0.197	689	691	688
	0.198	689.5	691.5	690
	0.199	685.5	695	692
	0.2	686	691	689
	0.201	689.5	691.5	689
	0.202	687	693	689
	0.203	689	692	690
	0.204	688.5	690	692
	0.205	688	689.5	690.5
	0.206	687.5	692	690
	0.207	686.5	693	691
	0.208	690.5	691	691
	0.209	689.5	685.5	691
	0.21	689	688	687.5
	0.211	689	689	691.5
	0.212	687	689.5	690
	0.213	690.5	690.5	690
	0.214	687.5	689.5	689
	0.215	688.5	687	689.5
	0.216	690	686	692
	0.217	689.5	688.5	690
	0.218	686.5	692	694
	0.219	689.5	689	693
	0.22	688	688.5	693
	0.221	691.5	689.5	689.5
	0.222	688	688	692
	0.223	690	685.5	691.5
	0.224	689.5	685.5	690.5
	0.225	688	691.5	690.5
	0.226	687	690.5	691
	0.227	689	690	690.5
	0.228	688.5	688	692
	0.229	692.5	688	694
	0.23	691	690.5	692.5
	0.231	690	690.5	693
	0.232	691	688.5	692
	0.233	690.5	684.5	692.5
	0.234	690.5	689	693
	0.235	692	690	690.5
	0.236	690.5	688.5	694.5
	0.237	692.5	687	690.5
	0.238	690	687.5	692.5
	0.239	693	685.5	692
	0.24	688.5	686.5	691
	0.241	691	683	693
	0.242	690.5	686	695
	0.243	690.5	689	690.5
	0.244	689.5	690.5	694.5
	0.245	691	687.5	697.5
	0.246	689	687	693
	0.247	690.5	687	692.5
	0.248	690.5	685	693
	0.249	693	685	690.5
	0.25	689	684	693
	0.251	686	684	691
	0.252	691.5	684.5	691.5
	0.253	687.5	688.5	691
	0.254	689	684.5	692.5
	0.255	693	685	692
	0.256	692	688.5	691.5
	0.257	687.5	687	693
	0.258	689.5	687	693
	0.259	690.5	687	689.5
	0.26	690.5	685.5	694.5
	0.261	691	684	693
	0.262	691	687	690.5
	0.263	691	685	692.5
	0.264	687.5	684.5	692
	0.265	689.5	684.5	692
	0.266	688.5	687	693
	0.267	690	687.5	691.5
	0.268	689.5	688	691
	0.269	690.5	684.5	690.5
	0.27	689	686	690.5
	0.271	686.5	690	693
	0.272	692.5	689.5	692
	0.273	690.5	689.5	690
	0.274	692	686	690.5
	0.275	690	691.5	689
	0.276	689.5	688	691
	0.277	690	690	689.5
	0.278	691.5	690.5	692.5
	0.279	691.5	689	692
	0.28	690.5	690	693
	0.281	689	691	690.5
	0.282	689.5	688	692
	0.283	692	693	690
	0.284	687	691	693
	0.285	690.5	693	696
	0.286	690.5	688.5	689
	0.287	689.5	692	690.5
	0.288	688.5	692	691
	0.289	692	692.5	689.5
	0.29	690.5	692	689.5
	0.291	690	691.5	694
	0.292	690.5	693	689.5
	0.293	690.5	693	691.5
	0.294	689.5	692	689.5
	0.295	695.5	691.5	688.5
	0.296	694.5	690.5	692.5
	0.297	691.5	691	689.5
	0.298	691.5	688	689
	0.299	692	695.5	692
	0.3	692.5	693	691
	0.301	691	689	688.5
	0.302	691.5	689.5	689
	0.303	693	691	689.5
	0.304	690.5	690	690
	0.305	692.5	692.5	690.5
	0.306	691	694.5	692
	0.307	690.5	691.5	689.5
	0.308	691.5	689	685.5
	0.309	691	691	691.5
	0.31	693	693	688.5
	0.311	692	690.5	690.5
	0.312	692.5	692	687
	0.313	695.5	690.5	690.5
	0.314	688.5	688	690.5
	0.315	694	691	689
	0.316	689.5	690.5	688
	0.317	689.5	691.5	692.5
	0.318	689.5	688	683.5
	0.319	694.5	690.5	684.5
	0.32	692	690.5	685.5
	0.321	693	689.5	689.5
	0.322	692	691.5	687
	0.323	692	689.5	691
	0.324	693.5	691	689
	0.325	691	690.5	690.5
	0.326	693	692	687.5
	0.327	690.5	691	689.5
	0.328	695	690.5	687.5
	0.329	692.5	691	688
	0.33	694	692	686
	0.331	693	692.5	687.5
	0.332	692	689.5	688.5
	0.333	691	689.5	684
	0.334	689	689.5	688
	0.335	690.5	692	685
	0.336	693	692.5	691
	0.337	691	693	688.5
	0.338	691	690	687
	0.339	690.5	690.5	685.5
	0.34	691.5	692.5	684
	0.341	693	690	687.5
	0.342	690.5	691.5	685.5
	0.343	690	689.5	689
	0.344	691.5	687.5	688.5
	0.345	690.5	691	687.5
	0.346	690.5	692.5	688.5
	0.347	696.5	691.5	687.5
	0.348	691	690.5	686
	0.349	691	691.5	689.5
	0.35	692	691	689
	0.351	691.5	691	686.5
	0.352	691.5	689.5	690.5
	0.353	691.5	688.5	687.5
	0.354	688	684.5	691
	0.355	690	690.5	687
	0.356	690.5	690.5	689.5
	0.357	692.5	689.5	685
	0.358	691.5	690.5	690
	0.359	695	687.5	688
	0.36	691	687	685.5
	0.361	689	687	689.5
	0.362	690.5	687	689.5
	0.363	689	685	690.5
	0.364	690.5	685.5	689
	0.365	688.5	687.5	686.5
	0.366	695	686.5	689
	0.367	690.5	687.5	690.5
	0.368	690.5	686.5	689.5
	0.369	689.5	687	688.5
	0.37	689.5	689.5	687
	0.371	688.5	683.5	687
	0.372	691	687	689
	0.373	692	690	690
	0.374	690.5	684	688
	0.375	690	689.5	688
	0.376	692	687	690.5
	0.377	688.5	684	690
	0.378	690	687	688.5
	0.379	690	683	689.5
	0.38	688	683.5	689
	0.381	690	686.5	688
	0.382	691.5	685.5	691.5
	0.383	689.5	684	689.5
	0.384	692	684.5	690.5
	0.385	689.5	684	689.5
	0.386	688.5	684	690
	0.387	692.5	687.5	689.5
	0.388	689.5	686	689.5
	0.389	692	682.5	689.5
	0.39	691.5	684	691
	0.391	691	684	690.5
	0.392	689.5	684	690
	0.393	688	687.5	690.5
	0.394	690.5	682	690.5
	0.395	687.5	685.5	690.5
	0.396	690	681	688
	0.397	688.5	682	692.5
	0.398	691	689.5	687.5
	0.399	690.5	684.5	691
	0.4	690	684	688
	0.401	685.5	682	690.5
	0.402	689	688	687
	0.403	692.5	689.5	688.5
	0.404	690	684	692.5
	0.405	690.5	686	690
	0.406	689	685.5	690.5
	0.407	691.5	683.5	690.5
	0.408	689.5	684	690.5
	0.409	689.5	684	692
	0.41	690.5	686	691.5
	0.411	689	684	687
	0.412	691.5	685	693
	0.413	691	684.5	691.5
	0.414	691	684	693
	0.415	691	686	692
	0.416	693	681.5	692
	0.417	687.5	682	690.5
	0.418	692.5	684	690.5
	0.419	690.5	687.5	690.5
	0.42	692	682.5	693
	0.421	693	684.5	691.5
	0.422	691	687	693
	0.423	692	685.5	691.5
	0.424	690.5	684.5	690.5
	0.425	692	686.5	692
	0.426	688	683.5	690
	0.427	692	684	693
	0.428	691.5	682.5	691
	0.429	690.5	684.5	691.5
	0.43	691.5	683	689
	0.431	690	684	689.5
	0.432	691.5	685.5	694.5
	0.433	690.5	684	691
	0.434	691.5	684.5	692
	0.435	688	685	690.5
	0.436	692.5	684	687.5
	0.437	689.5	685.5	688.5
	0.438	692.5	686	692
	0.439	690.5	684.5	688.5
	0.44	692.5	688.5	688.5
	0.441	692	686.5	690.5
	0.442	691	685	691.5
	0.443	691	688	690
	0.444	691	689	690.5
	0.445	695	688	685.5
	0.446	692	685.5	688.5
	0.447	693	688	688.5
	0.448	689.5	685.5	688
	0.449	692	689	687.5
	0.45	696.5	687	687.5
	0.451	692.5	684.5	689
	0.452	693	689	689.5
	0.453	693	685.5	686.5
	0.454	693	686	688
	0.455	691	687.5	688
	0.456	693	690	687
	0.457	691.5	690.5	688.5
	0.458	693	690.5	685
	0.459	692.5	692.5	687.5
	0.46	689.5	688	686.5
	0.461	692	689	688
	0.462	692	694	685.5
	0.463	690	690.5	687
	0.464	693	692.5	685.5
	0.465	691	692	684.5
	0.466	692	690.5	684
	0.467	690.5	690	690
	0.468	696.5	691	687
	0.469	692.5	689	684.5
	0.47	692	689.5	684.5
	0.471	690	693	685.5
	0.472	690.5	692	684.5
	0.473	690	691	684
	0.474	691.5	691	685.5
	0.475	693	693	687
	0.476	690	692.5	684
	0.477	690	695	683
	0.478	693	695.5	684
	0.479	690.5	691.5	684
	0.48	688	693	683.5
	0.481	691	691.5	682.5
	0.482	693	692.5	681
	0.483	687.5	695	679
	0.484	691.5	695.5	683.5
	0.485	689.5	693	684
	0.486	689	697.5	680
	0.487	691	693	684.5
	0.488	691	694.5	684
	0.489	691	692.5	684
	0.49	692.5	693	683.5
	0.491	688.5	691.5	681.5
	0.492	691	692.5	683.5
	0.493	692.5	694.5	685.5
	0.494	688	695.5	682
	0.495	689.5	693	684
	0.496	685.5	693	681.5
	0.497	689.5	696	684
	0.498	689	695	685
	0.499	688	693	684.5
	0.5	692	696.5	682
	0.501	689.5	694.5	684
	0.502	688.5	693	686.5
	0.503	688	693	684.5
	0.504	686	694.5	684
	0.505	688.5	694	685.5
	0.506	690	696	681
	0.507	687	694	684
	0.508	691	695	684.5
	0.509	689.5	697	684.5
	0.51	690.5	695	685.5
	0.511	685.5	690.5	683
	0.512	688.5	693	685.5
	0.513	687.5	695	682.5
	0.514	685	691	688
	0.515	686.5	693	684
	0.516	690.5	690.5	686.5
	0.517	687	693	684
	0.518	687	692.5	682
	0.519	688.5	693	686.5
	0.52	687	695	683
	0.521	690.5	693	686.5
	0.522	689.5	696.5	683.5
	0.523	690	693	684
	0.524	689	693	685
	0.525	690.5	693	684.5
	0.526	690	692.5	684.5
	0.527	686.5	692	682.5
	0.528	688.5	692	685.5
	0.529	690	689	683
	0.53	687.5	693	684
	0.531	688.5	690.5	685
	0.532	687.5	692.5	684
	0.533	688.5	695	684.5
	0.534	687.5	691.5	685
	0.535	689.5	688	684
	0.536	689.5	693	687.5
	0.537	689.5	689	687.5
	0.538	689.5	691	688.5
	0.539	687.5	692.5	687.5
	0.54	689.5	691.5	687
	0.541	686	691.5	685.5
	0.542	686.5	691	684
	0.543	688.5	691.5	685.5
	0.544	687	692	685.5
	0.545	684	694.5	689
	0.546	691	693	687.5
	0.547	690.5	692	690.5
	0.548	687.5	692	685
	0.549	690.5	692	685.5
	0.55	690.5	694.5	690
	0.551	687.5	691	689.5
	0.552	691.5	695	686
	0.553	686	693	684
	0.554	687.5	691	685.5
	0.555	689	690.5	687.5
	0.556	687.5	695	688.5
	0.557	690.5	693	686.5
	0.558	687	692.5	688
	0.559	690.5	690	689.5
	0.56	688.5	688.5	689.5
	0.561	690.5	690	686
	0.562	691.5	689.5	687
	0.563	687.5	688.5	684.5
	0.564	688	690.5	689.5
	0.565	689.5	691	685.5
	0.566	690.5	692	687.5
	0.567	692	689.5	686.5
	0.568	687	691.5	691
	0.569	689.5	690.5	689
	0.57	690	690.5	687
	0.571	690.5	689	687.5
	0.572	689	690.5	687
	0.573	690.5	687.5	689.5
	0.574	692	689.5	688
	0.575	688	689.5	689
	0.576	687	691	690.5
	0.577	691	693	685
	0.578	688.5	689.5	685.5
	0.579	692.5	689	687
	0.58	689.5	689	690
	0.581	687	691	685.5
	0.582	689.5	687.5	691
	0.583	690.5	690	689
	0.584	686	688.5	691
	0.585	688.5	690.5	686
	0.586	690.5	688	686
	0.587	690.5	689	688.5
	0.588	692	689	686.5
	0.589	691.5	687.5	687.5
	0.59	693	689.5	685.5
	0.591	690.5	689.5	688
	0.592	689.5	690	685.5
	0.593	688.5	692	686.5
	0.594	691.5	689.5	689.5
	0.595	691	685.5	688
	0.596	690.5	684.5	692
	0.597	689	687.5	688
	0.598	688.5	691.5	688
	0.599	692	691.5	693
	0.6	690	689.5	689
	0.601	689.5	686.5	687.5
	0.602	688.5	687	688.5
	0.603	690.5	688.5	690
	0.604	688	692	685
	0.605	693	690.5	687.5
	0.606	689.5	689	688
	0.607	690	690.5	684.5
	0.608	692.5	687.5	688
	0.609	693	687.5	686.5
	0.61	689.5	689	685.5
	0.611	689	689	688
	0.612	688.5	689	689.5
	0.613	690	687	686.5
	0.614	691.5	691	684.5
	0.615	689	694.5	690
	0.616	688	688	686.5
	0.617	694.5	690.5	688
	0.618	690.5	690.5	686.5
	0.619	689	689.5	685.5
	0.62	691.5	691	687
	0.621	689.5	692	684.5
	0.622	689.5	693	689
	0.623	686.5	692	690.5
	0.624	693	692.5	687
	0.625	690.5	692	689
	0.626	688	692	689.5
	0.627	690.5	690	687.5
	0.628	692.5	696	690.5
	0.629	686.5	687.5	689
	0.63	687	690.5	685
	0.631	687	688.5	688.5
	0.632	691	689	688.5
	0.633	693	691	689.5
	0.634	688	691	687.5
	0.635	690	691	689.5
	0.636	691	691	691
	0.637	690	692.5	690.5
	0.638	691	689	688
	0.639	687.5	693	687.5
	0.64	687.5	693	689.5
	0.641	687.5	689	691
	0.642	687.5	687.5	686.5
	0.643	689	690.5	689.5
	0.644	687.5	691	691
	0.645	690.5	692.5	690
	0.646	690	691	687
	0.647	690.5	690.5	688
	0.648	690.5	690.5	691
	0.649	689.5	690.5	692.5
	0.65	688.5	691	688.5
	0.651	691	690.5	688.5
	0.652	687.5	691	692
	0.653	688	687.5	691
	0.654	689	690.5	688
	0.655	692.5	691	693
	0.656	690	692	688.5
	0.657	693	691.5	693
	0.658	690	687	692.5
	0.659	686	689	692.5
	0.66	687.5	693	689.5
	0.661	690	687.5	691
	0.662	691	686.5	693
	0.663	689	690.5	688
	0.664	690.5	693	693
	0.665	688	691.5	694.5
	0.666	691.5	690.5	694.5
	0.667	689.5	691.5	695.5
	0.668	688.5	687	694.5
	0.669	692	689	694.5
	0.67	689.5	691	697.5
	0.671	688	685	692.5
	0.672	695	687	692.5
	0.673	692	689.5	691.5
	0.674	688.5	690.5	692.5
	0.675	691	686.5	691.5
	0.676	688.5	689.5	696
	0.677	689.5	688	692
	0.678	691	689.5	694.5
	0.679	693	685	691.5
	0.68	689	686	690.5
	0.681	690.5	689.5	694
	0.682	692	689.5	696
	0.683	691.5	687	693
	0.684	691	688.5	694.5
	0.685	694	687.5	691.5
	0.686	690.5	685	693
	0.687	689	688	692.5
	0.688	688.5	687	692
	0.689	692	685	692
	0.69	689.5	683.5	693
	0.691	693	688.5	692.5
	0.692	691.5	682	693.5
	0.693	692	686	693
	0.694	693	684	691.5
	0.695	688.5	685	690.5
	0.696	691.5	684	692
	0.697	692.5	684	693
	0.698	693	684.5	693
	0.699	692	682.5	690.5
	0.7	692.5	684	691
	0.701	691	683.5	693
	0.702	690.5	682.5	689.5
	0.703	691.5	683	689
	0.704	689.5	687	689
	0.705	692	686.5	691
	0.706	690.5	684	690
	0.707	691.5	683.5	691.5
	0.708	693	685.5	691.5
	0.709	691	685.5	694.5
	0.71	688.5	685.5	690
	0.711	689.5	688	690.5
	0.712	690.5	685	689
	0.713	690.5	684	691
	0.714	690	685.5	686
	0.715	689.5	687.5	690.5
	0.716	689	682.5	687
	0.717	689	681.5	691
	0.718	690.5	685.5	688
	0.719	691.5	686.5	689
	0.72	692.5	687	691.5
	0.721	692	687.5	688.5
	0.722	692.5	683	689
	0.723	686.5	681.5	689
	0.724	691.5	685	689
	0.725	688	687.5	687.5
	0.726	689.5	685.5	688
	0.727	690.5	687.5	692
	0.728	689	686.5	690.5
	0.729	690.5	685.5	688
	0.73	689.5	686	694
	0.731	689	685.5	689.5
	0.732	690	686	688.5
	0.733	689.5	687	688.5
	0.734	685.5	684	691
	0.735	688.5	684.5	689.5
	0.736	690.5	685.5	689
	0.737	687.5	685.5	688.5
	0.738	690	687	691
	0.739	690.5	686.5	688
	0.74	689.5	684.5	688.5
	0.741	688.5	689.5	686.5
	0.742	690	687.5	688
	0.743	688	688.5	688
	0.744	690.5	690.5	687.5
	0.745	691	684	690.5
	0.746	687.5	686	691.5
	0.747	689.5	684	687.5
	0.748	690	686.5	689.5
	0.749	687.5	689.5	689
	0.75	689.5	686.5	690.5
	0.751	689.5	683	689.5
	0.752	688	690	689.5
	0.753	689	685	690.5
	0.754	689	687	691
	0.755	690	684.5	692
	0.756	689	685.5	690.5
	0.757	693	684.5	691.5
	0.758	687	688	690
	0.759	689	686.5	690.5
	0.76	692	688.5	692
	0.761	688.5	684	693
	0.762	688	686.5	686.5
	0.763	691	683	690.5
	0.764	683.5	683.5	687.5
	0.765	688.5	685	690
	0.766	688	684.5	692
	0.767	689	685.5	693
	0.768	689.5	687	693
	0.769	689.5	685.5	691.5
	0.77	689.5	685.5	693
	0.771	691	686	691
	0.772	687	685.5	690
	0.773	690	689.5	689
	0.774	690	686.5	687
	0.775	691	683.5	695
	0.776	689.5	686.5	692.5
	0.777	689	689	691.5
	0.778	688	689.5	691
	0.779	689.5	685	692.5
	0.78	689.5	686	692
	0.781	687.5	689.5	692
	0.782	691.5	685.5	693
	0.783	689	688.5	689
	0.784	692.5	685	690.5
	0.785	689.5	685	693
	0.786	689	689.5	692.5
	0.787	690.5	688	688
	0.788	689	690.5	689.5
	0.789	688	685.5	690.5
	0.79	689.5	688.5	689
	0.791	691	685.5	687.5
	0.792	688.5	687.5	687.5
	0.793	688	688.5	691
	0.794	689	689	691
	0.795	690.5	687.5	689.5
	0.796	687.5	690.5	689
	0.797	693	687	689.5
	0.798	691.5	689.5	690
	0.799	690	688.5	687
	0.8	691	688.5	687.5
	0.801	690	689.5	688.5
	0.802	690.5	690.5	688.5
	0.803	688.5	690.5	691
	0.804	687.5	689	686.5
	0.805	688	691.5	686.5
	0.806	690.5	688.5	688
	0.807	685.5	690.5	686
	0.808	690.5	691	689.5
	0.809	693	691.5	690.5
	0.81	690.5	690.5	686.5
	0.811	690.5	692.5	690
	0.812	691	693	686
	0.813	689	691.5	689.5
	0.814	690	693	683.5
	0.815	690	692	686.5
	0.816	695	691	684.5
	0.817	690.5	690.5	687.5
	0.818	692.5	692	686.5
	0.819	690.5	693	688
	0.82	690.5	692.5	686
	0.821	694	690.5	685.5
	0.822	691	694	686.5
	0.823	689.5	694.5	687
	0.824	692	693	685.5
	0.825	691	696	683
	0.826	691.5	694.5	685
	0.827	690.5	694	684.5
	0.828	692.5	691	686
	0.829	689.5	690	684
	0.83	694.5	690.5	685.5
	0.831	693	696	685.5
	0.832	690.5	693	685.5
	0.833	695	698	683
	0.834	691.5	693	684
	0.835	691	697	684
	0.836	692	692	684
	0.837	690	697.5	688.5
	0.838	689.5	697	683.5
	0.839	690	693	686.5
	0.84	690.5	695.5	686
	0.841	692	690.5	686
	0.842	689.5	693	685
	0.843	690.5	698	684
	0.844	689	697.5	683.5
	0.845	692.5	692.5	686.5
	0.846	688.5	697.5	683
	0.847	691	695.5	684
	0.848	692	692	684
	0.849	690.5	698	684
	0.85	689	699.5	685.5
	0.851	689.5	693	685
	0.852	690.5	697	683.5
	0.853	690.5	695	684
	0.854	692	693	687
	0.855	693	695.5	684
	0.856	690.5	691.5	682
	0.857	690.5	696	680.5
	0.858	690.5	698.5	684
	0.859	692.5	694.5	684
	0.86	690.5	692.5	684
	0.861	690.5	697.5	684.5
	0.862	691	695	684.5
	0.863	690.5	695	685.5
	0.864	691	690.5	684
	0.865	691	693	687
	0.866	692.5	694	684
	0.867	691	693	687
	0.868	689	694	685.5
	0.869	688	694.5	684.5
	0.87	690	693	684
	0.871	689.5	695	684
	0.872	692	692	685
	0.873	686	692	686.5
	0.874	688.5	694	684
	0.875	692	693	684
	0.876	689	693	684
	0.877	690.5	694	685
	0.878	692.5	693	687.5
	0.879	692	695	687
	0.88	689.5	690	688
	0.881	688.5	696	688
	0.882	690	693	689.5
	0.883	690.5	694.5	684
	0.884	688.5	694.5	687.5
	0.885	690.5	690.5	691
	0.886	689.5	691.5	688.5
	0.887	692	691	688.5
	0.888	688.5	692	690.5
	0.889	688	690.5	688.5
	0.89	688	693	687
	0.891	687.5	688	688.5
	0.892	687.5	692.5	689
	0.893	691	691.5	687.5
	0.894	689	693	686
	0.895	688.5	691	690
	0.896	689	693	688.5
	0.897	688.5	692	687.5
	0.898	688	690.5	686
	0.899	686	692	690
	0.9	687	688.5	688
	0.901	688	690.5	687.5
	0.902	687	694.5	690
	0.903	689	694	688.5
	0.904	686.5	692.5	691
	0.905	686	691	688.5
	0.906	688	691.5	689.5
	0.907	688.5	689	689
	0.908	686.5	692	688
	0.909	688.5	690.5	688.5
	0.91	687	689	689.5
	0.911	688.5	691	689.5
	0.912	687.5	693	690.5
	0.913	687	687	691
	0.914	689	692	687
	0.915	687.5	690.5	687.5
	0.916	688	692	691.5
	0.917	688.5	692.5	687
	0.918	688	690.5	690.5
	0.919	684.5	687.5	690.5
	0.92	685	690	688
	0.921	689	692.5	690.5
	0.922	688.5	688.5	688.5
	0.923	687.5	692	691.5
	0.924	690	692.5	693
	0.925	688	691.5	687.5
	0.926	690.5	691	691
	0.927	688.5	688.5	690.5
	0.928	685.5	692	690.5
	0.929	684	690	690
	0.93	689	689	689.5
	0.931	685	691.5	692.5
	0.932	690.5	690	690.5
	0.933	689	689.5	687
	0.934	688.5	693	688
	0.935	689	689.5	690.5
	0.936	687	686	689
	0.937	688.5	685.5	690
	0.938	688.5	690.5	688.5
	0.939	689	691.5	688.5
	0.94	687.5	691.5	689.5
	0.941	689.5	690.5	692.5
	0.942	690	686	691
	0.943	687.5	690.5	691
	0.944	685.5	690.5	691
	0.945	689.5	689	693
	0.946	687	690	691
	0.947	689.5	686.5	690.5
	0.948	687.5	691.5	689.5
	0.949	693	686.5	689
	0.95	684	687	690
	0.951	688.5	689	688
	0.952	693	689	690.5
	0.953	689.5	690.5	690.5
	0.954	693	687.5	688.5
	0.955	688.5	687	686.5
	0.956	688.5	687	690.5
	0.957	690	687.5	690.5
	0.958	687.5	690.5	691
	0.959	689.5	686.5	687
	0.96	690	685	689
	0.961	691	687	687
	0.962	692.5	687	689.5
	0.963	688.5	687	690.5
	0.964	687.5	691	688.5
	0.965	690.5	686.5	688
	0.966	688.5	690	688.5
	0.967	688	690	685
	0.968	691	690.5	689.5
	0.969	687.5	691	691
	0.97	692.5	686	690.5
	0.971	688.5	689.5	691
	0.972	689	690.5	687
	0.973	688.5	689	690.5
	0.974	690.5	688.5	691.5
	0.975	691.5	689.5	690.5
	0.976	690.5	690.5	687.5
	0.977	691	687	689
	0.978	687.5	687.5	690
	0.979	687	686.5	687.5
	0.98	686.5	689.5	692
	0.981	688	689.5	688
	0.982	687.5	691	690.5
	0.983	689.5	690.5	687.5
	0.984	689.5	690	690.5
	0.985	689.5	686	690.5
	0.986	692	688	690.5
	0.987	688.5	691.5	691
	0.988	691	690.5	688.5
	0.989	693	689.5	688.5
	0.99	690.5	688	688
	0.991	688	690	689.5
	0.992	691	689.5	691
	0.993	690.5	688	690.5
	0.994	687	688	690.5
	0.995	689	690	688.5
	0.996	689.5	691	692
	0.997	692	689.5	691.5
	0.998	690.5	691	691
	0.999	692.5	688.5	689
	1	689.5	691.5	692
	1.001	691.5	690.5	690
	1.002	692	692	688.5
	1.003	687.5	690.5	688.5
	1.004	690.5	690.5	690.5
	1.005	693	690.5	689
	1.006	691	694.5	692.5
	1.007	686	692	692.5
	1.008	690.5	692.5	690.5
	1.009	691	691.5	690
	1.01	692.5	689.5	690.5
	1.011	689	689.5	690
	1.012	688	690.5	691.5
	1.013	690.5	689.5	691
	1.014	688	689.5	695
	1.015	688.5	689	690.5
	1.016	688.5	690	689.5
	1.017	689.5	690.5	692
	1.018	689	694.5	690.5
	1.019	689.5	689.5	692.5
	1.02	690	691	692
	1.021	689.5	690.5	694.5
	1.022	688.5	690.5	695
	1.023	692.5	695.5	690.5
	1.024	691	691.5	690.5
	1.025	689.5	690.5	694.5
	1.026	690	689.5	692.5
	1.027	687	688.5	692.5
	1.028	691.5	690.5	692.5
	1.029	690	692.5	694.5
	1.03	691	691.5	693
	1.031	690.5	690.5	688.5
	1.032	693	690.5	692
	1.033	688.5	689.5	691
	1.034	692.5	694	694
	1.035	695	691.5	690.5
	1.036	690.5	692.5	689.5
	1.037	694	691	692
	1.038	689	693	688.5
	1.039	692.5	691.5	691.5
	1.04	690.5	691.5	693
	1.041	690.5	689.5	690.5
	1.042	690.5	690	692.5
	1.043	690.5	689	691.5
	1.044	692	688.5	693
	1.045	691.5	689	690.5
	1.046	687	687	693
	1.047	694	691.5	692.5
	1.048	689.5	685.5	688.5
	1.049	689.5	688	696
	1.05	693	687.5	692
	1.051	695	689	692
	1.052	693	688.5	689.5
	1.053	692	687.5	686
	1.054	690.5	690	692.5
	1.055	693	688	692.5
	1.056	690.5	687	693
	1.057	689.5	688	691.5
	1.058	694	690	692
	1.059	693	691	692
	1.06	687	690	691.5
	1.061	690.5	687	689.5
	1.062	689	687	689
	1.063	691	685	688
	1.064	690	686	689
	1.065	693	690.5	686
	1.066	689.5	690.5	691
	1.067	690	692	689.5
	1.068	690	689	685
	1.069	692	688	688
	1.07	693	690.5	688.5
	1.071	692	688	687
	1.072	690.5	693	689.5
	1.073	692.5	689.5	687
	1.074	689.5	687.5	685.5
	1.075	695	684.5	691
	1.076	690	689.5	686.5
	1.077	688	687	691
	1.078	690.5	691.5	689
	1.079	693	689	688
	1.08	691	690.5	689.5
	1.081	692.5	690	683.5
	1.082	688	689.5	688
	1.083	691.5	688.5	686.5
	1.084	689	692	687.5
	1.085	693	690.5	687
	1.086	692.5	690.5	686
	1.087	692.5	684	686.5
	1.088	689.5	692	689.5
	1.089	691.5	687.5	683.5
	1.09	690	688.5	686
	1.091	695.5	689.5	686
	1.092	693	687.5	687
	1.093	690.5	690.5	684.5
	1.094	693	688.5	685.5
	1.095	692.5	688.5	691
	1.096	693	688.5	685.5
	1.097	691	689.5	688.5
	1.098	691	689	688.5
	1.099	692	688	687
	1.1	689.5	686.5	683
	1.101	693	690.5	689.5
	1.102	690	690.5	688
	1.103	690.5	688	686.5
	1.104	690	688	686
	1.105	691	685.5	685.5
	1.106	692	690.5	686
	1.107	690.5	690	684.5
	1.108	689	690.5	687
	1.109	690.5	687.5	689.5
	1.11	693	690.5	688
	1.111	691.5	689	684
	1.112	693	685	685
	1.113	691.5	690.5	688
	1.114	689.5	689	687
	1.115	690	687.5	685.5
	1.116	690.5	688.5	686.5
	1.117	690.5	688.5	685
	1.118	691.5	690.5	686.5
	1.119	693	690.5	684
	1.12	689.5	689.5	687
	1.121	686.5	687.5	684
	1.122	689.5	688	689.5
	1.123	690	688.5	685.5
	1.124	690	690.5	685
	1.125	691	687	684
	1.126	689	686.5	688.5
	1.127	690	687.5	687.5
	1.128	689	689.5	687
	1.129	690.5	688.5	687
	1.13	692	687	685.5
	1.131	688	688.5	687.5
	1.132	686	689.5	690.5
	1.133	692.5	688	688.5
	1.134	687	693	685
	1.135	685	690	684.5
	1.136	692.5	690.5	689
	1.137	687	689	689
	1.138	688.5	690	687.5
	1.139	691.5	688	684.5
	1.14	690.5	690	689.5
	1.141	688.5	690.5	689
	1.142	686	689.5	689
	1.143	687	688	688.5
	1.144	692	689.5	687
	1.145	690.5	690.5	688.5
	1.146	688	688.5	692
	1.147	691.5	691.5	688
	1.148	688	695	690.5
	1.149	688	696	690
	1.15	690.5	692	687
	1.151	690.5	690.5	690.5
	1.152	690	689	690.5
	1.153	692	691	688
	1.154	691	689.5	689
	1.155	689.5	690	689
	1.156	690.5	692.5	691
	1.157	689.5	690	689.5
	1.158	690	692	691.5
	1.159	692.5	690.5	691
	1.16	690.5	692	691
	1.161	690	693	692
	1.162	687.5	692	690.5
	1.163	689	692	691.5
	1.164	691	692	689.5
	1.165	690.5	693	691
	1.166	688	691	691
	1.167	690.5	696	688.5
	1.168	690.5	693	690.5
	1.169	689.5	693	691
	1.17	686.5	692.5	694.5
	1.171	691	693	691
	1.172	689	695.5	691
	1.173	688	690.5	689.5
	1.174	690.5	690.5	693
	1.175	690	692	689.5
	1.176	690.5	691	690.5
	1.177	690.5	696	691
	1.178	689.5	693	689
	1.179	690	693	692.5
	1.18	689.5	690.5	690
	1.181	688	692	693
	1.182	689.5	694.5	690.5
	1.183	686.5	692.5	693
	1.184	689.5	693	690.5
	1.185	692	694.5	690
	1.186	692	693	686.5
	1.187	687	693	686
	1.188	687.5	693	687
	1.189	690	695	688
	1.19	690	696	689.5
	1.191	689.5	695	687.5
	1.192	689	692	692
	1.193	690.5	693	689.5
	1.194	690.5	692	691
	1.195	689	695	687
	1.196	690	692.5	686
	1.197	688.5	693	687.5
	1.198	690.5	695	689.5
	1.199	689.5	693	685.5
	1.2	695	693	689
	1.201	691	694.5	685.5
	1.202	689.5	693	683.5
	1.203	693	697	683.5
	1.204	690.5	693	688.5
	1.205	691.5	692	685.5
	1.206	690	694	686.5
	1.207	693	694.5	687
	1.208	692	693	684.5
	1.209	689.5	690.5	688
	1.21	691.5	693	684.5
	1.211	690.5	695	686
	1.212	687.5	694.5	687
	1.213	694.5	690	683
	1.214	693	690.5	685.5
	1.215	690	691	684
	1.216	688	693	685
	1.217	690.5	690.5	682.5
	1.218	693.5	691.5	682
	1.219	691	690.5	683
	1.22	693	691	685.5
	1.221	691	692.5	683
	1.222	691	691.5	681.5
	1.223	689	693	686.5
	1.224	689	688.5	686.5
	1.225	690	692	684
	1.226	692.5	693	682.5
	1.227	691.5	690.5	683
	1.228	689	690.5	684.5
	1.229	689.5	690.5	686
	1.23	692	688.5	684
	1.231	690	690.5	685.5
	1.232	688.5	691.5	687
	1.233	691	691	683
	1.234	691	692	687
	1.235	689	686.5	683.5
	1.236	692.5	690.5	685
	1.237	691	693	685.5
	1.238	691	688	686.5
	1.239	687.5	688	684
	1.24	690.5	690.5	684
	1.241	689	689.5	685
	1.242	692	691	686
	1.243	688.5	685	686
	1.244	691	689	685.5
	1.245	692	689.5	684
	1.246	690	687.5	684.5
	1.247	691	687	684
	1.248	692.5	686	687.5
	1.249	690.5	686.5	685.5
	1.25	689.5	688.5	685.5
	1.251	687.5	689	684
	1.252	693	686.5	687
	1.253	689	689.5	683
	1.254	693	686	687
	1.255	688.5	690.5	685
	1.256	689.5	685.5	687.5
	1.257	690.5	689.5	688
	1.258	692.5	686.5	687
	1.259	690.5	686.5	685
	1.26	688	690	690.5
	1.261	690.5	687.5	686
	1.262	690.5	690.5	687
	1.263	689.5	689.5	689
	1.264	693	689.5	683
	1.265	689	683.5	685
	1.266	689.5	686.5	690
	1.267	688	692	685.5
	1.268	685.5	684.5	690.5
	1.269	686	690	686
	1.27	689	690	685
	1.271	690.5	688.5	686.5
	1.272	687.5	684	690
	1.273	689.5	692	687.5
	1.274	689.5	689.5	686.5
	1.275	687.5	686.5	685.5
	1.276	686.5	691	689
	1.277	688	690.5	689.5
	1.278	688.5	689	688
	1.279	685	689.5	688
	1.28	687	686.5	688.5
	1.281	687.5	689.5	689
	1.282	687.5	684	688.5
	1.283	686	688	690.5
	1.284	690	690.5	689.5
	1.285	686.5	686.5	690
	1.286	688	689.5	690
	1.287	687	687	688
	1.288	689	690	684.5
	1.289	690.5	688	687.5
	1.29	688	687	688.5
	1.291	688.5	685.5	688
	1.292	690.5	688	686
	1.293	688.5	690	687.5
	1.294	688	685	686.5
	1.295	686	691	688.5
	1.296	689	689.5	686.5
	1.297	688.5	688.5	688
	1.298	682.5	685	687.5
	1.299	688	691	690.5
	1.3	686.5	691	687.5
	1.301	683.5	691	687.5
	1.302	686	692.5	691.5
	1.303	686	687	685
	1.304	689.5	690	685.5
	1.305	689	688.5	687
	1.306	686	692.5	689
	1.307	687	689	685.5
	1.308	688	690.5	688
	1.309	688.5	690.5	688
	1.31	688	688.5	690.5
	1.311	686	688.5	689
	1.312	688	689.5	688
	1.313	687.5	690.5	687
	1.314	689	691	686
	1.315	688	689.5	690.5
	1.316	685	691.5	691.5
	1.317	686	686.5	688.5
	1.318	684.5	689.5	690
	1.319	687	688.5	685.5
	1.32	687.5	691	687.5
	1.321	686	686	689.5
	1.322	689.5	690.5	687
	1.323	687.5	691	686
	1.324	684.5	693	688
	1.325	687	689	689
	1.326	685	691.5	689.5
	1.327	686.5	691.5	685.5
	1.328	684	691	693
	1.329	685.5	690.5	688.5
	1.33	685	688	690
	1.331	685.5	686.5	691.5
	1.332	685.5	688.5	688
	1.333	689.5	692.5	692.5
	1.334	686.5	689	686.5
	1.335	686.5	686	687
	1.336	688	687	690.5
	1.337	686.5	687	689
	1.338	689	687.5	689
	1.339	684.5	688	688
	1.34	687	686.5	691.5
	1.341	687.5	687.5	690
	1.342	684.5	688.5	689
	1.343	685	687.5	690.5
	1.344	685.5	685.5	691.5
	1.345	686.5	686	691
	1.346	686.5	687.5	690
	1.347	685.5	686.5	690.5
	1.348	682.5	684	690
	1.349	684	690.5	688.5
	1.35	685	687	686
	1.351	684	691.5	688.5
	1.352	684.5	686.5	689.5
	1.353	685	687.5	688
	1.354	685	685.5	688
	1.355	685	684.5	689
	1.356	683.5	684.5	690
	1.357	687	687.5	692
	1.358	685	691	691.5
	1.359	692	690.5	691
	1.36	687	686	689
	1.361	686.5	685.5	687.5
	1.362	688.5	686	691
	1.363	686	688.5	690
	1.364	686.5	687.5	692
	1.365	686	692.5	687.5
	1.366	684	688	690.5
	1.367	688	690.5	689
	1.368	685.5	687	690
	1.369	684.5	688	690.5
	1.37	685	690.5	692
	1.371	685.5	690.5	690.5
	1.372	685.5	690	690.5
	1.373	687.5	688.5	691.5
	1.374	690.5	691.5	693
	1.375	686.5	691.5	689.5
	1.376	691	686.5	689.5
	1.377	688	689	688
	1.378	689	689	687.5
	1.379	687	692	688.5
	1.38	687	694	690.5
	1.381	687	688.5	693
	1.382	688.5	686	690.5
	1.383	689	690	690.5
	1.384	690	690	688.5
	1.385	689.5	689.5	689
	1.386	688	688.5	689
	1.387	690	689	691
	1.388	689	690.5	687
	1.389	688	689	694.5
	1.39	686.5	690.5	689.5
	1.391	687.5	688.5	691
	1.392	689.5	687	689.5
	1.393	691	689.5	691
	1.394	688	688.5	690.5
	1.395	689	688	689
	1.396	693	690	692
	1.397	689.5	690.5	687.5
	1.398	688	688	692
	1.399	692	687.5	692
	1.4	691	690	692.5
	1.401	691.5	693	690.5
	1.402	692	688	690.5
	1.403	691	687	690
	1.404	689.5	687.5	689
	1.405	689.5	689.5	689.5
	1.406	690	689	686.5
	1.407	688	686	692.5
	1.408	692	690.5	688
	1.409	691.5	690	691.5
	1.41	691	687.5	689.5
	1.411	691	689	689.5
	1.412	692	685	687
	1.413	691	685.5	688
	1.414	690.5	686.5	690.5
	1.415	689.5	686.5	692
	1.416	691	688	687
	1.417	692.5	687	690.5
	1.418	691.5	685	689
	1.419	691.5	687	687.5
	1.42	691	683.5	687
	1.421	692.5	685.5	690.5
	1.422	690	684.5	687.5
	1.423	696	683	688.5
	1.424	695	684.5	688
	1.425	692.5	685.5	690.5
	1.426	695	684	689
	1.427	696	682	685.5
	1.428	693	680	687
	1.429	692.5	683	688
	1.43	692	682.5	685.5
	1.431	692	684	684
	1.432	692.5	681	688
	1.433	692.5	681.5	690.5
	1.434	697	678	687.5
	1.435	693	681.5	689.5
	1.436	693	682.5	689
	1.437	696.5	684	690
	1.438	691	681.5	691
	1.439	692.5	680.5	691
	1.44	695.5	678	690
	1.441	691.5	678	688.5
	1.442	691	684	685
	1.443	690.5	683	687.5
	1.444	694	680	688
	1.445	690.5	682.5	689
	1.446	692.5	681	689
	1.447	691.5	682	691
	1.448	691.5	684	691
	1.449	692	678	689.5
	1.45	690.5	680.5	688
	1.451	690.5	681.5	685
	1.452	694.5	681.5	687
	1.453	691	684	686.5
	1.454	692.5	682	690.5
	1.455	688.5	684	689.5
	1.456	689.5	682	690.5
	1.457	692	686	691
	1.458	691	684	689.5
	1.459	690.5	684.5	689.5
	1.46	691.5	682.5	685
	1.461	690.5	683.5	689
	1.462	688.5	683	689.5
	1.463	690	686.5	688.5
	1.464	687	684.5	690
	1.465	687	689	688
	1.466	685.5	684	687.5
	1.467	686	682	687.5
	1.468	686.5	684	689
	1.469	686.5	684.5	688.5
	1.47	687	686.5	687.5
	1.471	684.5	688.5	686.5
	1.472	684	684	686.5
	1.473	686.5	682.5	687
	1.474	685	684.5	691
	1.475	683.5	684.5	687.5
	1.476	687	684	687.5
	1.477	684.5	683.5	690.5
	1.478	683.5	682.5	687
	1.479	684.5	689.5	691.5
	1.48	685	683	688
	1.481	684	682.5	691
	1.482	685	682.5	688
	1.483	680.5	682	688.5
	1.484	684	679.5	689
	1.485	685.5	682	692
	1.486	684	678	687.5
	1.487	681.5	680.5	690.5
	1.488	681	677	690
	1.489	686.5	681	689.5
	1.49	681.5	677	691
	1.491	684	680.5	690.5
	1.492	680.5	676.5	689
	1.493	681.5	678	691.5
	1.494	684	677	690
	1.495	682.5	676	688.5
	1.496	686.5	675.5	692.5
	1.497	685.5	675.5	691.5
	1.498	685.5	670	691
	1.499	687	671	693
	1.5	684	668.5	695
	1.501	685.5	668.5	690.5
	1.502	690.5	668	692
	1.503	689.5	665.5	690.5
	1.504	687.5	662	689.5
	1.505	686	662.5	689
	1.506	690.5	663.5	692
	1.507	689	662.5	686
	1.508	687	661	692.5
	1.509	691.5	663	691.5
	1.51	690.5	657	692
	1.511	694.5	652.5	689
	1.512	692.5	648	686
	1.513	693	648	687
	1.514	694.5	648.5	689.5
	1.515	694.5	646.5	690.5
	1.516	696	641.5	688
	1.517	693	641.5	688.5
	1.518	698	636.5	690.5
	1.519	696	636	690
	1.52	694	630.5	690.5
	1.521	696	630	687.5
	1.522	697	627	687
	1.523	697.5	624	689
	1.524	699	620.5	689.5
	1.525	698	616.5	686.5
	1.526	699	614.5	687.5
	1.527	700	615	689.5
	1.528	698.5	605.5	688
	1.529	700	601.5	688
	1.53	700	599	688
	1.531	700	595	687
	1.532	699.5	594.5	684
	1.533	702	588.5	686.5
	1.534	703	585	687.5
	1.535	703.5	581.5	686
	1.536	703	577.5	685.5
	1.537	703.5	574	684
	1.538	704.5	566.5	687.5
	1.539	704.5	562.5	685.5
	1.54	699.5	558.5	687
	1.541	705	554	687.5
	1.542	702.5	548.5	687.5
	1.543	704.5	541.5	689
	1.544	705.5	539	687
	1.545	704.5	538.5	686.5
	1.546	704.5	535.5	685.5
	1.547	706.5	528	688.5
	1.548	708	524	686
	1.549	704.5	521.5	689.5
	1.55	704.5	516.5	684.5
	1.551	702	511	689.5
	1.552	704.5	509.5	686
	1.553	705	506	687
	1.554	703	502.5	688.5
	1.555	704	493.5	688
	1.556	707	489	690
	1.557	708	484	688.5
	1.558	707	478.5	687
	1.559	708	475	685
	1.56	706	473	689
	1.561	705	467	687.5
	1.562	707	461	689.5
	1.563	703.5	458.5	685.5
	1.564	707.5	449.5	690.5
	1.565	706	448	685
	1.566	704.5	442.5	686.5
	1.567	704.5	437.5	688
	1.568	708	436	684
	1.569	708	431.5	685.5
	1.57	706	428.5	685.5
	1.571	705	423.5	687.5
	1.572	705	417	684.5
	1.573	706	413.5	684.5
	1.574	706	411	688
	1.575	707.5	409	688
	1.576	704.5	403.5	685.5
	1.577	706	401	684.5
	1.578	704	391.5	686.5
	1.579	702.5	393.5	685
	1.58	705.5	389.5	686
	1.581	704	383.5	685
	1.582	702	380	687
	1.583	705	378	684.5
	1.584	705.5	374.5	684.5
	1.585	703.5	374	684.5
	1.586	703	368	687.5
	1.587	703.5	368	687
	1.588	706	362	688.5
	1.589	705	358.5	684
	1.59	703	357.5	686
	1.591	702	351	682
	1.592	704.5	349	686.5
	1.593	703	344.5	682.5
	1.594	705	341	686.5
	1.595	703.5	339	684
	1.596	698	335.5	685.5
	1.597	702	332.5	682.5
	1.598	698.5	327.5	685
	1.599	703.5	328.5	680
	1.6	702.5	325	684
	1.601	697	320	684.5
	1.602	699	318	680
	1.603	698.5	316.5	683
	1.604	698	316.5	681
	1.605	700.5	309.5	681
	1.606	697.5	310.5	683
	1.607	698	306.5	684
	1.608	696.5	303	683
	1.609	693	302.5	682
	1.61	695	300	681
	1.611	693	300	682
	1.612	692	295	680.5
	1.613	691.5	295.5	680.5
	1.614	692	295	677
	1.615	690.5	291.5	680
	1.616	695	287	678
	1.617	690.5	289	674.5
	1.618	688	287	678
	1.619	686.5	281.5	680
	1.62	691	279.5	678
	1.621	686.5	281	678
	1.622	689	280.5	678
	1.623	685.5	280	676.5
	1.624	685.5	278.5	676.5
	1.625	684	276	678
	1.626	684.5	275	675.5
	1.627	678	268	676
	1.628	682.5	274.5	675.5
	1.629	679	270.5	678
	1.63	679.5	268	677.5
	1.631	678	271.5	676
	1.632	678	270	678
	1.633	678	265	678
	1.634	677.5	269	678
	1.635	675	269.5	682.5
	1.636	673.5	269	677
	1.637	671	266	677
	1.638	670	267	678
	1.639	671.5	262.5	681.5
	1.64	670.5	265	682
	1.641	665.5	264	682
	1.642	667.5	266.5	681
	1.643	666	264.5	684
	1.644	663.5	268.5	684.5
	1.645	663.5	267.5	686.5
	1.646	661.5	264	684.5
	1.647	663.5	262.5	689.5
	1.648	661	269	688
	1.649	661.5	265.5	685.5
	1.65	656.5	264	689.5
	1.651	657	266.5	692
	1.652	655.5	265.5	692.5
	1.653	657	268	692.5
	1.654	656.5	264	695.5
	1.655	650	268	695
	1.656	647	268.5	695.5
	1.657	648.5	265.5	695
	1.658	648.5	266.5	697.5
	1.659	646.5	266.5	696.5
	1.66	642	267.5	698
	1.661	640	271	700
	1.662	642.5	267	700.5
	1.663	637.5	268.5	700.5
	1.664	643	270.5	699.5
	1.665	639	272.5	704
	1.666	636	272.5	701.5
	1.667	636.5	273.5	705
	1.668	635	275.5	707.5
	1.669	630.5	275.5	705.5
	1.67	628.5	275.5	706
	1.671	632	278.5	708
	1.672	625.5	276	704.5
	1.673	626.5	280	706
	1.674	624.5	280.5	707.5
	1.675	623.5	281	708
	1.676	623	280	708
	1.677	622	281	707
	1.678	615.5	282	711.5
	1.679	617.5	287	712
	1.68	616.5	288	708
	1.681	614.5	284.5	708
	1.682	613.5	287.5	711
	1.683	616	290	708
	1.684	611	290.5	714
	1.685	609	295.5	711.5
	1.686	610	294.5	711.5
	1.687	610.5	294	708
	1.688	607	291.5	712.5
	1.689	603.5	297	712
	1.69	603.5	299	708
	1.691	601.5	298	712.5
	1.692	600.5	300.5	712.5
	1.693	599.5	302.5	711
	1.694	595	304	712.5
	1.695	592.5	307	713
	1.696	597.5	308	708
	1.697	588.5	309	707.5
	1.698	588	311.5	713.5
	1.699	587	311	708
	1.7	585	314.5	711
	1.701	584.5	319	714.5
	1.702	583	321.5	714
	1.703	582	321	712.5
	1.704	577	322	712.5
	1.705	574	327	708
	1.706	571	329.5	707.5
	1.707	570	331	713
	1.708	569	336	708
	1.709	564.5	338.5	708
	1.71	564.5	338.5	708
	1.711	558.5	341	708
	1.712	558.5	345	711
	1.713	553.5	345.5	708
	1.714	551	348.5	706.5
	1.715	551	352	705
	1.716	551.5	352	707
	1.717	545.5	355.5	706.5
	1.718	543	358.5	707.5
	1.719	540	361.5	707
	1.72	536	364	707
	1.721	536.5	365	702
	1.722	531.5	369	703
	1.723	526.5	372	704
	1.724	525.5	379.5	702
	1.725	522	380.5	702
	1.726	516	383	701
	1.727	518	385.5	700
	1.728	513.5	390.5	700
	1.729	512	394.5	699
	1.73	506.5	396.5	699
	1.731	503	401.5	702.5
	1.732	500.5	405.5	696
	1.733	499	408.5	697.5
	1.734	494	410	695
	1.735	487.5	415	696
	1.736	487	415	693
	1.737	487.5	426.5	689.5
	1.738	481.5	429.5	691
	1.739	477.5	437.5	693
	1.74	474	434	692
	1.741	474.5	443	692
	1.742	469.5	446.5	687.5
	1.743	469.5	447	687.5
	1.744	466	453.5	689.5
	1.745	464	458	686.5
	1.746	462	461.5	687.5
	1.747	457.5	463.5	683
	1.748	456	472	685.5
	1.749	452.5	476	683
	1.75	451	480	681
	1.751	446	485.5	683.5
	1.752	444.5	492	678
	1.753	443	494	680
	1.754	439.5	497.5	677
	1.755	437.5	504	676
	1.756	439.5	506	678
	1.757	437.5	511.5	677
	1.758	430	514	676.5
	1.759	429.5	521.5	673
	1.76	428.5	528	670
	1.761	426	532	669.5
	1.762	423	538	669.5
	1.763	420.5	543.5	670
	1.764	420	544	666.5
	1.765	415.5	551	667
	1.766	415.5	557.5	669
	1.767	411	563	662.5
	1.768	410.5	565	663.5
	1.769	407	571	658
	1.77	403.5	576	656.5
	1.771	403.5	583.5	656.5
	1.772	399.5	588.5	652
	1.773	398	591.5	652.5
	1.774	398.5	602	653.5
	1.775	391.5	603.5	648.5
	1.776	393	609	645.5
	1.777	384.5	616.5	644.5
	1.778	388	625.5	645
	1.779	384	632.5	643
	1.78	385	638	642
	1.781	377.5	646.5	642
	1.782	380	655	631.5
	1.783	374	659	633.5
	1.784	376	669.5	634.5
	1.785	373	673.5	628.5
	1.786	370	681	628
	1.787	369	689	626.5
	1.788	365	692	624
	1.789	361	704.5	622
	1.79	366.5	708	616.5
	1.791	360	720.5	618
	1.792	355.5	723	616
	1.793	358.5	731.5	611
	1.794	355	739.5	610
	1.795	352	746	610
	1.796	351.5	755	606.5
	1.797	349.5	762	602.5
	1.798	344	767.5	601
	1.799	343	779	602
	1.8	344.5	782	601
	1.801	342	790.5	599.5
	1.802	341	797.5	596.5
	1.803	336.5	808.5	594
	1.804	335	816.5	591
	1.805	333.5	825.5	592
	1.806	332.5	832.5	588
	1.807	325.5	839	585
	1.808	323	845.5	585
	1.809	326	849.5	579.5
	1.81	320	865	582.5
	1.811	322	872	579
	1.812	320	875.5	578
	1.813	319.5	887	575
	1.814	314	892	572.5
	1.815	312.5	897	570
	1.816	310.5	905.5	570
	1.817	308	913.5	567.5
	1.818	302.5	920	562
	1.819	305.5	926.5	564
	1.82	303	935.5	559
	1.821	300	941.5	559
	1.822	300	946.5	556
	1.823	298	952.5	550.5
	1.824	298	961	549.5
	1.825	295.5	967.5	547
	1.826	295	974	547
	1.827	292.5	981	544
	1.828	294	986.5	540.5
	1.829	291.5	995.5	536.5
	1.83	291	999.5	535.5
	1.831	287	1006	529
	1.832	290	1012.5	529
	1.833	285	1020	527.5
	1.834	288	1028	523.5
	1.835	283.5	1036	520.5
	1.836	280	1040.5	518.5
	1.837	283	1049.5	516.5
	1.838	286	1054.5	510
	1.839	283	1062.5	506
	1.84	278.5	1071	499
	1.841	281	1076	500.5
	1.842	283	1084.5	494.5
	1.843	282.5	1093	495
	1.844	282	1095.5	490.5
	1.845	285.5	1108	484
	1.846	281	1116.5	480.5
	1.847	286	1121.5	478
	1.848	282.5	1130	473
	1.849	284.5	1136	465
	1.85	285	1149	463
	1.851	287.5	1155.5	463
	1.852	281	1163	457
	1.853	290	1173.5	454.5
	1.854	288.5	1185	448
	1.855	289.5	1194	443
	1.856	290.5	1203.5	438
	1.857	290.5	1211	438
	1.858	294	1222.5	432
	1.859	295.5	1232	425
	1.86	296.5	1242	422.5
	1.861	296	1244.5	416.5
	1.862	298	1258.5	412
	1.863	298	1267	411.5
	1.864	301	1280	410
	1.865	301	1292	403.5
	1.866	303.5	1298.5	398
	1.867	307	1313	395
	1.868	307	1319.5	390.5
	1.869	310.5	1330.5	391
	1.87	305.5	1343.5	384
	1.871	312.5	1354	380
	1.872	310	1364	379
	1.873	311.5	1374.5	372
	1.874	313.5	1385	370
	1.875	313	1394	367
	1.876	313.5	1405	362
	1.877	312	1415	357.5
	1.878	314	1423.5	356
	1.879	318	1437	354
	1.88	314.5	1446	349.5
	1.881	317.5	1459	348.5
	1.882	320	1468	347.5
	1.883	322.5	1476	343.5
	1.884	321	1483.5	337
	1.885	320	1498	336
	1.886	323	1507	335
	1.887	325.5	1513	327.5
	1.888	323	1527.5	324.5
	1.889	324	1537	327
	1.89	325.5	1543	321.5
	1.891	328.5	1555	320.5
	1.892	328	1566	321.5
	1.893	332.5	1571	315
	1.894	336	1580	315.5
	1.895	335	1587.5	314.5
	1.896	339	1597.5	309
	1.897	338.5	1602.5	305
	1.898	342	1610.5	305.5
	1.899	347	1621	302.5
	1.9	348	1627.5	304.5
	1.901	352	1632.5	305.5
	1.902	349	1641.5	305
	1.903	358.5	1647.5	304
	1.904	360.5	1656	300.5
	1.905	361	1660.5	298
	1.906	366	1670.5	299.5
	1.907	369	1675.5	303
	1.908	376.5	1677	299.5
	1.909	381	1686	302
	1.91	382.5	1691	300.5
	1.911	385	1692	300
	1.912	389	1703	300.5
	1.913	391	1707	300.5
	1.914	394.5	1716	298.5
	1.915	398.5	1720.5	300
	1.916	403	1721	299
	1.917	402	1722	301.5
	1.918	405	1722	303
	1.919	410	1731	301
	1.92	413.5	1735	307.5
	1.921	420.5	1737	307.5
	1.922	425	1742	306
	1.923	427.5	1741.5	307
	1.924	432.5	1743.5	308.5
	1.925	437	1744	304.5
	1.926	441.5	1748	309.5
	1.927	444.5	1746.5	310
	1.928	452	1747	307.5
	1.929	458	1749	304.5
	1.93	456.5	1748	308.5
	1.931	463	1748	310.5
	1.932	468	1751	309.5
	1.933	475.5	1751.5	308
	1.934	478.5	1751	309
	1.935	485.5	1751.5	307
	1.936	488.5	1751.5	306.5
	1.937	493.5	1751.5	304.5
	1.938	501.5	1751	303.5
	1.939	504	1751.5	305
	1.94	507	1749	305.5
	1.941	515.5	1750.5	303.5
	1.942	524.5	1748.5	304.5
	1.943	528	1751.5	301
	1.944	533.5	1751	301.5
	1.945	540	1751.5	299.5
	1.946	548.5	1750	300.5
	1.947	554.5	1746.5	298.5
	1.948	559	1750	294
	1.949	566.5	1747	294.5
	1.95	572	1747	297.5
	1.951	574	1744	296.5
	1.952	581	1744	296
	1.953	591	1744	296.5
	1.954	594.5	1742.5	295.5
	1.955	602	1740.5	292
	1.956	605	1741	290.5
	1.957	611	1741	294.5
	1.958	617.5	1737	291
	1.959	628.5	1732.5	286
	1.96	633.5	1736	292
	1.961	640	1734	290.5
	1.962	648.5	1733	289
	1.963	656	1732.5	289.5
	1.964	662.5	1730.5	291
	1.965	673.5	1722	288
	1.966	683	1722	288.5
	1.967	695.5	1722	287
	1.968	704.5	1722	289
	1.969	708	1720	290.5
	1.97	715.5	1720	293
	1.971	727.5	1721.5	294
	1.972	734.5	1722	296
	1.973	746.5	1719.5	296
	1.974	752.5	1716.5	294
	1.975	765	1714.5	294
	1.976	772.5	1713.5	296
	1.977	779.5	1707	296
	1.978	788.5	1705.5	298.5
	1.979	796.5	1701.5	301
	1.98	807	1701	301
	1.981	812.5	1699.5	305
	1.982	823.5	1703.5	300
	1.983	836	1697	305.5
	1.984	842	1697.5	309
	1.985	848.5	1700	305.5
	1.986	859.5	1695.5	312.5
	1.987	868.5	1692	309.5
	1.988	876.5	1689.5	308.5
	1.989	884	1689	315.5
	1.99	892.5	1685	313
	1.991	898.5	1682.5	317
	1.992	909	1683	320
	1.993	914	1682.5	322
[truncated: 13,006 more rows]

## Sheet: F
DataTypeVer2.0	Time	Fz	Fz	Fz
NumberOfData		7000	7000	7000
PreTriggerData		0	0	0
SamplingTime[ms]		1	1	1
DataLabel		C1:CMJ	C2:CMJ	C3:CMJ
DataUnit	sec	N	N	N
	0	613	615	617.5
	0.001	610.5	614.5	617.5
	0.002	613	617	614
	0.003	614.5	614	615.5
	0.004	612.5	610.5	616
	0.005	614	610	612.5
	0.006	614.5	613	615.5
	0.007	617	616	620
	0.008	613	613	618
	0.009	612.5	612.5	616
	0.01	615	613	616.5
	0.011	612.5	614	614
	0.012	610.5	613	615
	0.013	615.5	613	613.5
	0.014	612.5	613.5	616.5
	0.015	615.5	613.5	613.5
	0.016	611	614	614
	0.017	616	613.5	616
	0.018	615.5	609.5	617
	0.019	612	613	616.5
	0.02	613	612	617
	0.021	613	615.5	614
	0.022	614.5	612	615.5
	0.023	613.5	613.5	614
	0.024	614.5	613.5	613
	0.025	615.5	613.5	614.5
	0.026	614	612.5	615.5
	0.027	615.5	615	613.5
	0.028	615.5	611.5	615.5
	0.029	610	611.5	614
	0.03	616.5	612.5	613
	0.031	615.5	610.5	613
	0.032	615	609	618
	0.033	616	613.5	613
	0.034	615	613	615.5
	0.035	613	613	616
	0.036	613.5	613.5	615
	0.037	614.5	610	611.5
	0.038	613.5	610	613
	0.039	615.5	613	615.5
	0.04	612.5	610	612.5
	0.041	611.5	612	616
	0.042	615.5	614	613.5
	0.043	612.5	613.5	610
	0.044	613.5	611.5	613
	0.045	612.5	613.5	610
	0.046	613.5	612	614.5
	0.047	613.5	611.5	610
	0.048	616	612.5	611.5
	0.049	615.5	613	611
	0.05	613.5	613.5	609
	0.051	615	613.5	610.5
	0.052	615.5	611	611
	0.053	615.5	609.5	610
	0.054	613.5	612	613
	0.055	614.5	613.5	611.5
	0.056	614.5	609	610
	0.057	613	611.5	609
	0.058	619	610	609.5
	0.059	617	610	610
	0.06	614.5	611.5	610
	0.061	613.5	612.5	610
	0.062	615.5	615.5	606.5
	0.063	616	614	608
	0.064	619.5	614	609
	0.065	616	610	608
	0.066	619	612	610
	0.067	616	616	609
	0.068	611.5	611	609.5
	0.069	614	613.5	611.5
	0.07	617	614	608.5
	0.071	615	614	609.5
	0.072	619	612	609
	0.073	616	612	610
	0.074	613.5	615	606.5
	0.075	615.5	610	608.5
	0.076	612.5	618	606.5
	0.077	615.5	615	606.5
	0.078	615.5	615.5	610
	0.079	613.5	615	605
	0.08	615.5	612	605.5
	0.081	615.5	614	608.5
	0.082	615.5	614.5	609.5
	0.083	613.5	616	608.5
	0.084	616.5	615.5	608.5
	0.085	609.5	613	607.5
	0.086	615.5	614.5	606.5
	0.087	616.5	610.5	609.5
	0.088	616.5	614.5	606.5
	0.089	615	615.5	610
	0.09	616	613	605
	0.091	614.5	613.5	604.5
	0.092	613.5	612	604.5
	0.093	616.5	611.5	606
	0.094	615.5	615.5	606
	0.095	615.5	613	606.5
	0.096	614	610.5	608.5
	0.097	612.5	611.5	606
	0.098	614.5	613	608.5
	0.099	619.5	613	608.5
	0.1	616.5	612.5	608.5
	0.101	616.5	609	610
	0.102	616	612.5	609.5
	0.103	617.5	614	609.5
	0.104	611	610.5	608.5
	0.105	616	612	611
	0.106	615	607.5	610
	0.107	616.5	613	607
	0.108	616	609	609.5
	0.109	615.5	608.5	611
	0.11	616.5	609	607
	0.111	616.5	610.5	607.5
	0.112	619	609	609.5
	0.113	614.5	610	608
	0.114	613.5	607.5	609.5
	0.115	615	608	607.5
	0.116	617	610	612.5
	0.117	613.5	611	609.5
	0.118	616.5	606	611
	0.119	617	608.5	611
	0.12	616.5	608.5	615.5
	0.121	615.5	605.5	613.5
	0.122	615.5	609	614
	0.123	618	608.5	613
	0.124	619	610	612
	0.125	617.5	607	613.5
	0.126	616	605.5	612
	0.127	616.5	607.5	612
	0.128	618	609	612
	0.129	619	606.5	610
	0.13	616	608.5	612.5
	0.131	617.5	605.5	610
	0.132	617	606.5	613.5
	0.133	617	604	612.5
	0.134	617	608.5	614
	0.135	616.5	605	614
	0.136	619	606.5	613.5
	0.137	615.5	609	612
	0.138	616.5	606.5	609.5
	0.139	614.5	610	613.5
	0.14	615	606.5	613.5
	0.141	613.5	606.5	614.5
	0.142	616	606.5	613
	0.143	615	606.5	610
	0.144	615.5	603	613.5
	0.145	613.5	608.5	614
	0.146	616.5	609	612.5
	0.147	615	606.5	612.5
	0.148	615.5	608.5	616
	0.149	616	609.5	608.5
	0.15	615	606	614
	0.151	618	606.5	614
	0.152	616.5	607.5	613.5
	0.153	615	610	616.5
	0.154	617.5	609.5	614
	0.155	612.5	609.5	613
	0.156	616	606.5	613.5
	0.157	612.5	610	614
	0.158	616.5	611.5	614.5
	0.159	613	608.5	613.5
	0.16	613.5	608.5	614
	0.161	615.5	608.5	618
	0.162	616	612	615.5
	0.163	612.5	608	613.5
	0.164	615.5	606.5	614
	0.165	619	611	616
	0.166	613.5	608.5	616
	0.167	618	609.5	614
	0.168	612.5	610	614.5
	0.169	612.5	607	612.5
	0.17	614.5	610	619
	0.171	616	610.5	613.5
	0.172	615.5	608.5	615.5
	0.173	617	608.5	618
	0.174	614.5	610	615.5
	0.175	614	609	614
	0.176	615	612	612.5
	0.177	615	609.5	613.5
	0.178	615.5	610	612
	0.179	616	609.5	609
	0.18	616.5	607.5	610
	0.181	615.5	608.5	612
	0.182	615.5	606.5	613
	0.183	615.5	610	615.5
	0.184	617	612.5	612.5
	0.185	613.5	607.5	613
	0.186	612	610	613.5
	0.187	619	608.5	614.5
	0.188	615.5	610	615
	0.189	615.5	610	616
	0.19	613.5	610	611
	0.191	616	608.5	613
	0.192	617	607	613.5
	0.193	616.5	610	615.5
	0.194	617	609	616
	0.195	612	612.5	614
	0.196	615.5	608.5	612
	0.197	614	610	613
	0.198	613.5	610	615.5
	0.199	616.5	606.5	617.5
	0.2	613.5	610	615
	0.201	611	612.5	618
	0.202	613.5	610	612.5
	0.203	615.5	609.5	615
	0.204	611.5	610	615.5
	0.205	611	609	615.5
	0.206	614	609	611
	0.207	613.5	607	610
	0.208	612.5	610	615
	0.209	611.5	613	615
	0.21	609	612.5	614
	0.211	611.5	610.5	615.5
	0.212	612	611.5	614.5
	0.213	612	611	614
	0.214	611	611	612.5
	0.215	610	612.5	614
	0.216	609.5	611.5	614.5
	0.217	609.5	610	614
	0.218	609	611	611.5
	0.219	609.5	613.5	616
	0.22	613.5	613	614
	0.221	609	616	614
	0.222	613	612	616
	0.223	607	613.5	614
	0.224	608.5	612.5	613.5
	0.225	613.5	613	616
	0.226	613.5	614	613
	0.227	608.5	614	615.5
	0.228	610.5	615.5	611.5
	0.229	609	612.5	616
	0.23	610	614	613.5
	0.231	608.5	613.5	609.5
	0.232	609	614	612.5
	0.233	611.5	613	616
	0.234	611	611.5	612.5
	0.235	608.5	612	613
	0.236	611	616.5	613.5
	0.237	611	617	614.5
	0.238	613.5	609.5	612
	0.239	612	613.5	615.5
	0.24	609	613.5	615.5
	0.241	611	614	613.5
	0.242	609	615.5	614
	0.243	608.5	616	611
	0.244	610	617	610
	0.245	610	613	609
	0.246	609	616.5	611.5
	0.247	611	615.5	614
	0.248	611.5	618	609.5
	0.249	611.5	616.5	615.5
	0.25	613	614	611
	0.251	611.5	613.5	611.5
	0.252	611	613	614
	0.253	613	615	613.5
	0.254	612.5	613	613
	0.255	611.5	613	616.5
	0.256	611.5	614	612.5
	0.257	609.5	614.5	612
	0.258	609	616.5	613
	0.259	613.5	615.5	610
	0.26	609.5	613.5	611
	0.261	612.5	613.5	613
	0.262	613	612	613.5
	0.263	613.5	613	612.5
	0.264	612.5	615.5	612
	0.265	612.5	615.5	613
	0.266	614	614.5	613
	0.267	610	613.5	608.5
	0.268	613.5	614	611.5
	0.269	609.5	613.5	609.5
	0.27	613	613	611
	0.271	614.5	612	612.5
	0.272	613.5	614.5	611
	0.273	610.5	612.5	608.5
	0.274	612.5	613.5	608.5
	0.275	614.5	612	610
	0.276	611	615.5	608.5
	0.277	613.5	615	613.5
	0.278	613.5	614	609.5
	0.279	613.5	615	608.5
	0.28	613.5	614.5	610
	0.281	612.5	614.5	609
	0.282	616	612.5	609
	0.283	614	612.5	608.5
	0.284	612.5	615.5	612
	0.285	615	611.5	610
	0.286	612.5	609.5	611.5
	0.287	613	615.5	611
	0.288	613.5	610.5	608
	0.289	613	613.5	609.5
	0.29	617	614	610
	0.291	614.5	611	605.5
	0.292	613.5	609	609
	0.293	613.5	608.5	606.5
	0.294	614.5	612	605
	0.295	611.5	614.5	603.5
	0.296	612.5	613.5	609.5
	0.297	614.5	612.5	608
	0.298	608	612	606.5
	0.299	613	615	607.5
	0.3	613	613.5	605
	0.301	613.5	613	606
	0.302	613.5	608.5	608
	0.303	610.5	608.5	606.5
	0.304	613	613.5	605
	0.305	615	609	604
	0.306	615.5	612.5	605
	0.307	616	610	606
	0.308	615.5	612.5	607.5
	0.309	615.5	611	606.5
	0.31	615.5	612.5	604
	0.311	616.5	609	606.5
	0.312	613.5	613.5	608.5
	0.313	613.5	615.5	605.5
	0.314	615	609	604.5
	0.315	611.5	610	606.5
	0.316	613	614	608.5
	0.317	615	610	604.5
	0.318	618.5	609	604.5
	0.319	613.5	613	608
	0.32	616.5	608	608.5
	0.321	615	614.5	608.5
	0.322	616.5	614.5	605
	0.323	613.5	608.5	608.5
	0.324	617.5	610	610
	0.325	615.5	614.5	609
	0.326	617	610	610.5
	0.327	615	613.5	610
	0.328	613.5	613.5	606
	0.329	615.5	609.5	607.5
	0.33	614.5	610	606
	0.331	615.5	610	608.5
	0.332	616	612	608.5
	0.333	616	611	609.5
	0.334	616.5	606	608
	0.335	615.5	613	608.5
	0.336	616.5	612.5	607
	0.337	614.5	609	608.5
	0.338	613.5	608.5	612
	0.339	615.5	612.5	613.5
	0.34	615.5	608.5	609.5
	0.341	615.5	612	613.5
	0.342	613.5	609	609.5
	0.343	618.5	608.5	613.5
	0.344	613	611.5	613
	0.345	615	610	607.5
	0.346	617	612	610
	0.347	617.5	609	610
	0.348	616	611.5	612.5
	0.349	618.5	610	613
	0.35	613.5	612.5	610
	0.351	614.5	611.5	612.5
	0.352	615.5	608.5	616.5
	0.353	615.5	610.5	611
	0.354	619.5	609.5	610
	0.355	616.5	609.5	614
	0.356	614.5	607	610
	0.357	615.5	609	612
	0.358	619	611	613
	0.359	619	611.5	614.5
	0.36	615.5	610	613.5
	0.361	617	612	613.5
	0.362	617	610.5	613.5
	0.363	613.5	615.5	611
	0.364	615.5	612.5	613
	0.365	615	611.5	612
	0.366	616	610	614
	0.367	615	613	613.5
	0.368	622	613	614
	0.369	615.5	609	614
	0.37	617	612	616
	0.371	618	610	615.5
	0.372	616.5	610	614
	0.373	618	611.5	616
	0.374	615.5	610	612.5
	0.375	616	611	616
	0.376	616.5	609.5	613.5
	0.377	613.5	612.5	612
	0.378	619	616.5	614
	0.379	618	611.5	617.5
	0.38	614.5	611	617.5
	0.381	616	614	616.5
	0.382	619	614.5	616.5
	0.383	617	614.5	613.5
	0.384	617	611.5	617.5
	0.385	613.5	613.5	613.5
	0.386	616	617	611
	0.387	617	615.5	616.5
	0.388	617	613	615
	0.389	617	616.5	617
	0.39	616	613.5	615.5
	0.391	615.5	612.5	615.5
	0.392	614	615	616
	0.393	616	613.5	610
	0.394	616.5	614.5	615
	0.395	615.5	615.5	618
	0.396	617	612	616
	0.397	613.5	613.5	614
	0.398	615	615	616
	0.399	613.5	616	616.5
	0.4	617	612.5	614.5
	0.401	616	617	614
	0.402	613.5	615	616
	0.403	614.5	616	612.5
	0.404	619.5	613	615.5
	0.405	614.5	615.5	610
	0.406	615	614	615.5
	0.407	614	614.5	614.5
	0.408	616.5	612.5	615.5
	0.409	611.5	614.5	614
	0.41	614.5	613.5	611.5
	0.411	611	612	614.5
	0.412	613.5	613	615
	0.413	615.5	611	616.5
	0.414	616	612	613
	0.415	613.5	616.5	615.5
	0.416	612	613.5	613.5
	0.417	615.5	614.5	612.5
	0.418	611	614.5	614.5
	0.419	614.5	613.5	615.5
	0.42	615	615.5	615.5
	0.421	613	614	612
	0.422	611	612	612.5
	0.423	613.5	615	612.5
	0.424	616.5	615	614
	0.425	611	610	616.5
	0.426	616	615	612
	0.427	610.5	615.5	610
	0.428	611.5	613.5	614
	0.429	611.5	614.5	612.5
	0.43	615	610	612.5
	0.431	611.5	612	610
	0.432	613	614	609
	0.433	613	611	610
	0.434	613.5	610	612
	0.435	611.5	610	614
	0.436	611	609.5	610
	0.437	614.5	608.5	613
	0.438	613.5	610	608.5
	0.439	614.5	610	611
	0.44	613.5	610	611
	0.441	609.5	612	612.5
	0.442	611	610	613.5
	0.443	611.5	608.5	610
	0.444	614.5	609.5	609.5
	0.445	614.5	609	610
	0.446	610	609	613.5
	0.447	613.5	608.5	611
	0.448	613.5	609	612
	0.449	609.5	612	607
	0.45	611.5	615	609.5
	0.451	614.5	610	608
	0.452	613	608.5	613.5
	0.453	616	608.5	612
	0.454	612	609.5	613
	0.455	613	608	613
	0.456	613	608.5	608.5
	0.457	615.5	608.5	609.5
	0.458	613.5	606	608.5
	0.459	618	610	612.5
	0.46	615.5	610.5	614
	0.461	613.5	607	613.5
	0.462	613.5	609.5	613
	0.463	616	612	609
	0.464	612.5	611.5	612
	0.465	619	608	610
	0.466	613.5	608.5	610
	0.467	614.5	609	611
	0.468	612.5	608.5	613.5
	0.469	612.5	606.5	609
	0.47	618	607.5	610
	0.471	616.5	608.5	607.5
	0.472	618	606	610
	0.473	611.5	613.5	609
	0.474	616.5	609	615.5
	0.475	616.5	609.5	612
	0.476	615	610	610
	0.477	615	608.5	613
	0.478	617	611	613.5
	0.479	615.5	608.5	614
	0.48	615	610	606.5
	0.481	616.5	608.5	615.5
	0.482	620	608	612
	0.483	615.5	609	613
	0.484	615.5	609.5	611.5
	0.485	615.5	609	610
	0.486	613.5	606.5	614
	0.487	614.5	609.5	614
	0.488	615.5	611.5	611.5
	0.489	617.5	608.5	612
	0.49	616.5	611	613
	0.491	616.5	615.5	610.5
	0.492	615.5	606.5	614
	0.493	616.5	613.5	613
	0.494	619	609.5	609
	0.495	617.5	610	612
	0.496	617	615.5	610
	0.497	615.5	610.5	609
	0.498	615.5	612	613
	0.499	619	612.5	613.5
	0.5	615.5	611.5	613
	0.501	616	615.5	610.5
	0.502	611	612	611
	0.503	616	615.5	610
	0.504	615.5	610	610
	0.505	615.5	615.5	611.5
	0.506	615.5	610	609
	0.507	615.5	611.5	609
	0.508	616	614.5	612.5
	0.509	613.5	618	609.5
	0.51	613.5	614	609
	0.511	615	612	610
	0.512	614.5	619	606.5
	0.513	613.5	616.5	610
	0.514	611.5	613.5	608.5
	0.515	614.5	614.5	612
	0.516	616.5	615.5	615
	0.517	614	615.5	608.5
	0.518	613.5	615.5	612
	0.519	613.5	616.5	609
	0.52	612.5	617.5	609
	0.521	611.5	614.5	608.5
	0.522	611.5	619	611.5
	0.523	614.5	617	611
	0.524	613	615.5	608.5
	0.525	611	614	608.5
	0.526	611	616	611
	0.527	614.5	612	610
	0.528	613.5	613.5	611
	0.529	613.5	618	610
	0.53	612.5	611.5	611
	0.531	611.5	613.5	610
	0.532	610	614	609
	0.533	611.5	615.5	611
	0.534	615	613	610
	0.535	611.5	614	609
	0.536	612	615.5	611
	0.537	611.5	616	610
	0.538	611.5	612	606
	0.539	612	611.5	609
	0.54	615.5	613.5	612.5
	0.541	609.5	610	612.5
	0.542	614	613	610
	0.543	611.5	613	611
	0.544	613	613.5	610
	0.545	613	612.5	611
	0.546	613.5	614.5	606.5
	0.547	616	615.5	613
	0.548	611	610	607.5
	0.549	613	613.5	611
	0.55	615.5	614	613
	0.551	614	611	610.5
	0.552	611.5	610	610
	0.553	617	614	613
	0.554	612	611	612
	0.555	611.5	612	608.5
	0.556	613.5	610	609.5
	0.557	612.5	612	611
	0.558	615.5	610.5	609.5
	0.559	615.5	609.5	610
	0.56	613.5	608.5	610
	0.561	612.5	609	606
	0.562	614.5	607	614.5
	0.563	615	614.5	611.5
	0.564	612.5	610	612
	0.565	616.5	608.5	608.5
	0.566	612.5	608.5	610
	0.567	613.5	613	610
	0.568	616	610	609
	0.569	615.5	610	612
	0.57	616.5	608.5	611.5
	0.571	613.5	610	612
	0.572	618.5	607.5	612.5
	0.573	617	606.5	609.5
	0.574	614.5	609	610
	0.575	616	607	613
	0.576	613	608.5	609.5
	0.577	612.5	608.5	611.5
	0.578	616	609	613
	0.579	613.5	610	613
	0.58	613.5	610	615.5
	0.581	615.5	609.5	610
	0.582	617	608.5	611
	0.583	615.5	611	614
	0.584	613.5	608	611
	0.585	617	607.5	616
	0.586	615.5	610	610
	0.587	616.5	612	613.5
	0.588	616.5	613.5	611.5
	0.589	614.5	608.5	612
	0.59	613.5	613.5	616.5
	0.591	617	610	610.5
	0.592	615.5	608.5	612.5
	0.593	615	610	614.5
	0.594	614	608.5	614
	0.595	616	610	614
	0.596	614.5	609.5	614.5
	0.597	614.5	608.5	615
	0.598	613.5	613.5	616
	0.599	613.5	610	610
	0.6	615	610	613
	0.601	613	613	615.5
	0.602	611.5	608.5	609.5
	0.603	617.5	612.5	611.5
	0.604	617	610	610
	0.605	616.5	610	612
	0.606	615.5	610	612
	0.607	618.5	611.5	613.5
	0.608	615.5	611	613.5
	0.609	616	611	612.5
	0.61	615.5	611	613.5
	0.611	615.5	614.5	612.5
	0.612	619	610	614.5
	0.613	613.5	609	615.5
	0.614	617	608.5	612
	0.615	618.5	608.5	615.5
	0.616	614	609.5	611
	0.617	615	610	612
	0.618	615.5	613.5	610.5
	0.619	613.5	612	609.5
	0.62	618	610	610.5
	0.621	615.5	610	610
	0.622	612	612	612
	0.623	615.5	611.5	611
	0.624	610	611.5	612
	0.625	613.5	612	612
	0.626	618	612.5	611.5
	0.627	615.5	612	607.5
	0.628	615.5	614	608.5
	0.629	617.5	613.5	612
	0.63	617	613.5	613.5
	0.631	613	611.5	610
	0.632	613.5	611	611
	0.633	616.5	609.5	615.5
	0.634	615.5	613	611.5
	0.635	615.5	615	611
	0.636	615	612	611
	0.637	613.5	615.5	612
	0.638	613	613	613
	0.639	611.5	612	613
	0.64	614	613.5	607.5
	0.641	612.5	613	611.5
	0.642	613.5	615	612.5
	0.643	612.5	613.5	609.5
	0.644	609	610	611
	0.645	611	613.5	611
	0.646	609.5	615	609.5
	0.647	612.5	613.5	610
	0.648	612.5	618	613.5
	0.649	612.5	612.5	610
	0.65	613	614.5	614
	0.651	612.5	613.5	613.5
	0.652	611	613.5	612.5
	0.653	610.5	613.5	611
	0.654	612.5	614.5	613
	0.655	606.5	610	612.5
	0.656	611	613	610
	0.657	610.5	612	612.5
	0.658	608.5	613.5	618
	0.659	610	616.5	611.5
	0.66	608	616	613
	0.661	611.5	611	613.5
	0.662	608.5	617	614.5
	0.663	610.5	611.5	609
	0.664	609.5	615.5	610
	0.665	608.5	616	610
	0.666	607	614	609.5
	0.667	609	617	614
	0.668	610.5	618	613.5
	0.669	609.5	612.5	610.5
	0.67	608.5	615.5	611
	0.671	608	616	612.5
	0.672	609.5	615.5	614
	0.673	611	614	608
	0.674	608.5	615	608.5
	0.675	610.5	614	610
	0.676	610	616	610.5
	0.677	608.5	613.5	609
	0.678	611	614	609
	0.679	609.5	613	612
	0.68	610.5	614.5	611.5
	0.681	611.5	612	609.5
	0.682	608	614.5	609.5
	0.683	609.5	610	608.5
	0.684	611	614	608
	0.685	610	616.5	608.5
	0.686	613	616	609.5
	0.687	608	613.5	605.5
	0.688	609	613.5	609.5
	0.689	609	613	608
	0.69	611.5	612	612.5
	0.691	608.5	616	608.5
	0.692	608.5	616.5	607.5
	0.693	608.5	615	606.5
	0.694	609.5	611	607.5
	0.695	609	611	607.5
	0.696	608.5	611	610
	0.697	611	614	608.5
	0.698	614.5	614	610
	0.699	613.5	616	605.5
	0.7	608	613.5	609
	0.701	615	616	604.5
	0.702	612	613	608.5
	0.703	612	612.5	606.5
	0.704	609.5	610	607
	0.705	611.5	610	609
	0.706	611.5	615.5	609.5
	0.707	611.5	610	611.5
	0.708	612.5	612.5	610
	0.709	609	612.5	606.5
	0.71	615.5	610	608.5
	0.711	613	613	608.5
	0.712	611.5	609	613
	0.713	611.5	614	610
	0.714	612.5	614	606.5
	0.715	610.5	614.5	609
	0.716	612.5	612	607
	0.717	614	612.5	610
	0.718	612.5	610	605.5
	0.719	611.5	608.5	609.5
	0.72	613.5	609	610
	0.721	612.5	614	609.5
	0.722	614	608.5	608
	0.723	609	610	609
	0.724	612	613.5	610
	0.725	612.5	613.5	609.5
	0.726	613	614	610
	0.727	613.5	612.5	609.5
	0.728	615	611.5	609
	0.729	612.5	613	609
	0.73	612	611.5	608.5
	0.731	615.5	610	607.5
	0.732	615.5	612.5	610.5
	0.733	615.5	614	609.5
	0.734	613	614	606
	0.735	610.5	615.5	611.5
	0.736	614.5	610	610
	0.737	614.5	613	613
	0.738	612.5	615	611.5
	0.739	613.5	615	612
	0.74	609.5	609.5	609.5
	0.741	611.5	610.5	611
	0.742	611.5	612	608
	0.743	613.5	612	609.5
	0.744	610.5	610.5	612
	0.745	615.5	611	611
	0.746	613.5	612	611
	0.747	611.5	612	608.5
	0.748	611.5	611	612
	0.749	615	609.5	611.5
	0.75	615.5	612	609
	0.751	613.5	613	611.5
	0.752	616	610	613.5
	0.753	616.5	614	610.5
	0.754	611	613.5	613.5
	0.755	613.5	613.5	611
	0.756	616.5	614	609
	0.757	615.5	615.5	609.5
	0.758	613	613.5	608.5
	0.759	615.5	611.5	609
	0.76	611.5	614	610.5
	0.761	615.5	613.5	614
	0.762	615.5	616.5	612.5
	0.763	617	613	613.5
	0.764	618	612	613.5
	0.765	615.5	615	613.5
	0.766	618.5	612	612
	0.767	617	612	613
	0.768	616	611.5	614
	0.769	615.5	612.5	613.5
	0.77	617	610	615.5
	0.771	615	610	611.5
	0.772	615.5	612	612.5
	0.773	617.5	610	614
	0.774	613.5	613.5	610
	0.775	614.5	612	613.5
	0.776	615.5	612.5	613
	0.777	616	612.5	612
	0.778	619	613	612
	0.779	618.5	610	613.5
	0.78	621	610	610
	0.781	617	612.5	614
	0.782	612.5	609	615.5
	0.783	618	613	613
	0.784	616	611.5	610
	0.785	619	610	613.5
	0.786	620.5	612	612
	0.787	616	612.5	610.5
	0.788	616	613.5	613.5
	0.789	620	612.5	614
	0.79	619	611	613
	0.791	619.5	608.5	613.5
	0.792	618	612.5	612.5
	0.793	615	613	613
	0.794	620	613	616
	0.795	617.5	611	614.5
	0.796	622	610.5	610
	0.797	618	611	615.5
	0.798	615	611.5	613
	0.799	616.5	608.5	612
	0.8	619.5	613.5	613.5
	0.801	619.5	611.5	616
	0.802	615.5	611	613.5
	0.803	620.5	611.5	610
	0.804	617	609.5	613.5
	0.805	616	610	616.5
	0.806	620.5	611.5	610
	0.807	617	608	613
	0.808	616.5	612.5	613
	0.809	616	613	614
	0.81	620	611.5	612.5
	0.811	618	610.5	613.5
	0.812	616.5	613	614.5
	0.813	620	613.5	613.5
	0.814	615.5	610	612.5
	0.815	617	612.5	616.5
	0.816	619.5	608.5	617
	0.817	618	614	611.5
	0.818	617	611	612
	0.819	617	610	615.5
	0.82	616.5	609	610
	0.821	619.5	613	612
	0.822	615.5	610	614
	0.823	616	608.5	614
	0.824	615	610	615
	0.825	619	609	614
	0.826	617.5	612.5	613
	0.827	612.5	611	617.5
	0.828	615	609	613.5
	0.829	621.5	612	613
	0.83	619	610	616.5
	0.831	617	614	613.5
	0.832	618.5	612	612
	0.833	616	611.5	612.5
	0.834	615.5	612	610
	0.835	619.5	616.5	616.5
	0.836	615.5	609.5	613.5
	0.837	616.5	613	610
	0.838	618	613	611
	0.839	616.5	609	613.5
	0.84	615	610	610
	0.841	617	611.5	613
	0.842	616	611.5	613
	0.843	615	614	610
	0.844	618	610	611.5
	0.845	616.5	610	614
	0.846	615	609	610
	0.847	615.5	611	614
	0.848	615.5	611	614
	0.849	616.5	610	614
	0.85	617	608.5	613.5
	0.851	615.5	610.5	612.5
	0.852	613.5	607.5	612.5
	0.853	617	610	615.5
	0.854	615.5	611	612
	0.855	615.5	609.5	613.5
	0.856	615.5	608.5	614
	0.857	615.5	610	610
	0.858	614.5	610	612
	0.859	613.5	610.5	613.5
	0.86	615	606.5	610.5
	0.861	613.5	612	615
	0.862	614.5	610	615.5
	0.863	613	613	613
	0.864	617	613.5	612.5
	0.865	613.5	613.5	612
	0.866	613.5	611	612.5
	0.867	614	613.5	612
	0.868	615.5	608.5	613.5
	0.869	614.5	611.5	611
	0.87	616.5	612.5	612
	0.871	615.5	608.5	611.5
	0.872	613.5	613.5	612
	0.873	612	613.5	610
	0.874	613.5	608.5	611.5
	0.875	611	612.5	614
	0.876	613	614	615.5
	0.877	613.5	610	610
	0.878	611	607	612
	0.879	615	607.5	613.5
	0.88	615	611.5	611.5
	0.881	613	609	608.5
	0.882	613	607.5	612.5
	0.883	613	610	608.5
	0.884	613.5	611.5	611
	0.885	614	612.5	612.5
	0.886	609.5	610	612.5
	0.887	612.5	613	614
	0.888	612.5	610	611
	0.889	613.5	609.5	612.5
	0.89	614.5	610	612
	0.891	609.5	612.5	610
	0.892	613.5	614	610
	0.893	610.5	613.5	612.5
	0.894	609.5	613.5	609
	0.895	610.5	613.5	613.5
	0.896	613.5	609.5	611.5
	0.897	615	612	609
	0.898	612	611	609.5
	0.899	610.5	614	613
	0.9	615.5	611.5	608.5
	0.901	613.5	612	610.5
	0.902	611.5	615	611
	0.903	610.5	611	607
	0.904	613	612	610.5
	0.905	613.5	612	609
	0.906	612.5	616	608.5
	0.907	615.5	612.5	608
	0.908	615.5	617.5	608.5
	0.909	612.5	611.5	608
	0.91	612.5	618	613.5
	0.911	613.5	614	609
	0.912	613.5	613	610
	0.913	612.5	615.5	612
	0.914	614.5	614.5	609
	0.915	612.5	615.5	606.5
	0.916	613.5	619	610.5
	0.917	617	616.5	608.5
	0.918	612.5	616	608.5
	0.919	615.5	616.5	608
	0.92	615	616	608.5
	0.921	615.5	613.5	606.5
	0.922	613	618.5	610
	0.923	615.5	613	611.5
	0.924	615.5	615.5	613
	0.925	612.5	615.5	611
	0.926	615.5	615.5	608.5
	0.927	611.5	618	610.5
	0.928	613.5	613	614
	0.929	615.5	616.5	612
	0.93	616.5	616	611
	0.931	613	616.5	615.5
	0.932	615.5	617	609
	0.933	614.5	613	614
	0.934	618	614	612.5
	0.935	614.5	616.5	611.5
	0.936	614.5	615.5	610
	0.937	616.5	616.5	610
	0.938	616.5	612.5	615.5
	0.939	615.5	614	612
	0.94	613.5	613.5	611.5
	0.941	617	614	613
	0.942	616.5	612.5	611
	0.943	617	612.5	613.5
	0.944	617.5	611.5	614.5
	0.945	616	611.5	614
	0.946	611.5	607	614
	0.947	617	611.5	613.5
	0.948	615.5	607.5	614
	0.949	616	610	614
	0.95	618	608.5	615
	0.951	616.5	610	617.5
	0.952	616	606	612
	0.953	615.5	608.5	613.5
	0.954	615.5	605	613.5
	0.955	615.5	609	614
	0.956	613.5	609	615.5
	0.957	620.5	604.5	613
	0.958	620	606.5	615
	0.959	616	608.5	616
	0.96	616	603.5	615.5
	0.961	613	606	612
	0.962	613.5	608.5	615.5
	0.963	615.5	603.5	612.5
	0.964	615.5	603	613
	0.965	614.5	608	612
	0.966	613.5	604.5	615.5
	0.967	617	604.5	612
	0.968	617.5	601.5	613.5
	0.969	615.5	603.5	615
	0.97	613.5	601.5	613
	0.971	616	605	612
	0.972	615.5	599	613
	0.973	616	604	611
	0.974	615.5	601.5	615
	0.975	613.5	605	614.5
	0.976	616	599	614.5
	0.977	616.5	601.5	609
	0.978	614.5	600	610
	0.979	612.5	599	612.5
	0.98	615.5	601.5	611.5
	0.981	617	601.5	610
	0.982	617	600.5	612.5
	0.983	613	601	612
	0.984	616	598.5	608.5
	0.985	619.5	604.5	610
	0.986	617	599.5	608.5
	0.987	613	601	612
	0.988	615.5	600	612.5
	0.989	616.5	594.5	609.5
	0.99	612.5	599	613
	0.991	615.5	601.5	613
	0.992	616	599	610
	0.993	613.5	598.5	610
	0.994	615.5	601.5	612
	0.995	612.5	599	609.5
	0.996	618	601.5	609.5
	0.997	613.5	599	609
	0.998	611.5	601.5	610.5
	0.999	615.5	604.5	610
	1	616.5	603	608.5
	1.001	618.5	600.5	609.5
	1.002	616	601	610
	1.003	613.5	600.5	610
	1.004	613.5	603	610
	1.005	617	601.5	613.5
	1.006	615.5	601.5	612
	1.007	616.5	599	610
	1.008	616.5	606.5	606
	1.009	615.5	601.5	608
	1.01	613.5	601.5	608.5
	1.011	616.5	603.5	609.5
	1.012	616	604.5	608.5
	1.013	613.5	601	607
	1.014	618.5	604.5	608
	1.015	613	607	607.5
	1.016	615.5	603	612
	1.017	618.5	608.5	608.5
	1.018	613.5	608.5	607.5
	1.019	617	604.5	609.5
	1.02	619.5	604.5	610
	1.021	617	609	613
	1.022	615.5	608.5	611
	1.023	616.5	608.5	615.5
	1.024	616	609	611.5
	1.025	615	610	610
	1.026	615.5	608	612
	1.027	620	608	614.5
	1.028	616.5	609	610
	1.029	621	608	610
	1.03	615	609	612.5
	1.031	622	613.5	612
	1.032	614.5	610	612.5
	1.033	615.5	612.5	610
	1.034	616.5	610	611.5
	1.035	615	610.5	616
	1.036	616.5	609	614
	1.037	614.5	611	616
	1.038	613.5	612.5	615.5
	1.039	615.5	614.5	610
	1.04	612.5	611.5	614.5
	1.041	614.5	614	613
	1.042	618	610	618
	1.043	615.5	617	611
	1.044	616.5	613.5	615
	1.045	613.5	615.5	613.5
	1.046	616.5	616.5	612
	1.047	616.5	618	617.5
	1.048	613.5	616.5	615.5
	1.049	613.5	616.5	616
	1.05	618.5	615.5	615
	1.051	613.5	618	616.5
	1.052	611.5	620	614
	1.053	614.5	619.5	615
	1.054	616.5	616	615
	1.055	613	618	614.5
	1.056	613.5	618.5	616
	1.057	612	621.5	616
	1.058	615.5	617.5	612
	1.059	613.5	618	617.5
	1.06	615.5	618.5	615.5
	1.061	615	620	615
	1.062	613	619	613.5
	1.063	614.5	618.5	612.5
	1.064	612.5	619.5	616.5
	1.065	615.5	621.5	614.5
	1.066	615.5	618	616
	1.067	612.5	618.5	618.5
	1.068	615	618	615
	1.069	612	618.5	616.5
	1.07	611	619.5	618
	1.071	612.5	618	618
	1.072	613.5	620.5	615.5
	1.073	612.5	620.5	615.5
	1.074	612.5	620.5	615.5
	1.075	614.5	621.5	616.5
	1.076	611.5	622	615.5
	1.077	612	623	615.5
	1.078	615	620.5	615.5
	1.079	613.5	618.5	615
	1.08	613.5	620	616.5
	1.081	612.5	620.5	616.5
	1.082	613.5	621	613.5
	1.083	609.5	623	615.5
	1.084	613.5	622	612
	1.085	612.5	620	615.5
	1.086	613.5	623	615.5
	1.087	610	619	614
	1.088	612.5	623	614
	1.089	613	620.5	617
	1.09	613.5	619.5	613.5
	1.091	610.5	619	612
	1.092	611.5	620	614
	1.093	610.5	622	614
	1.094	612.5	621	615
	1.095	611.5	621.5	611
	1.096	609.5	619.5	611
	1.097	615.5	621.5	614.5
	1.098	611.5	619	614
	1.099	611.5	621.5	612.5
	1.1	614	619.5	612
	1.101	612	623	610
	1.102	613.5	618	615
	1.103	609	618.5	611
	1.104	609.5	623	611
	1.105	613.5	616.5	613.5
	1.106	610.5	622	609
	1.107	615	618.5	612.5
	1.108	612	618	611
	1.109	609	619.5	608.5
	1.11	608	617.5	608.5
	1.111	613.5	620	610
	1.112	611.5	616.5	610.5
	1.113	610	618	610
	1.114	611.5	616.5	613.5
	1.115	612.5	617.5	612
	1.116	612	618	610
	1.117	613	614	610
	1.118	610.5	615.5	610
	1.119	611.5	616	612.5
	1.12	610.5	616.5	609.5
	1.121	610.5	613.5	609
	1.122	609.5	614.5	610
	1.123	611.5	615	612.5
	1.124	613	614	608.5
	1.125	611.5	615.5	607
	1.126	613	612	610
	1.127	611.5	616	610
	1.128	608.5	610	609.5
	1.129	613.5	612	609.5
	1.13	611.5	609.5	609
	1.131	611	611	609.5
	1.132	611.5	613	608.5
	1.133	613.5	612.5	609
	1.134	613.5	609	612.5
	1.135	608	613.5	608.5
	1.136	611.5	615.5	610
	1.137	611	613	610
	1.138	611.5	612	610
	1.139	612.5	611	609
	1.14	611	610	612
	1.141	611.5	610	612
	1.142	612	613	609.5
	1.143	610.5	614.5	612
	1.144	612	612.5	609.5
	1.145	612.5	609	610.5
	1.146	614.5	613.5	612.5
	1.147	613.5	606.5	611.5
	1.148	614.5	611.5	609
	1.149	613.5	612	607.5
	1.15	610.5	613	609.5
	1.151	611.5	609	613.5
	1.152	611.5	608.5	608.5
	1.153	613	610	607.5
	1.154	612	610	608.5
	1.155	612	609.5	610
	1.156	613.5	609.5	608.5
	1.157	613.5	611.5	610
	1.158	610.5	609.5	607.5
	1.159	612.5	609	609.5
	1.16	609.5	610	608.5
	1.161	613	608.5	612
	1.162	613.5	610.5	608.5
	1.163	611	610	607
	1.164	614	612.5	606.5
	1.165	611	610	608
	1.166	613.5	615.5	606
	1.167	613.5	610	610
	1.168	610.5	610.5	607.5
	1.169	611.5	610	607
	1.17	612.5	611	608.5
	1.171	611	612	609.5
	1.172	613.5	611	606
	1.173	614.5	613.5	606.5
	1.174	613.5	613	604
	1.175	615.5	611.5	610
	1.176	613.5	610	608.5
	1.177	613.5	611.5	605.5
	1.178	612.5	608.5	608.5
	1.179	611.5	613.5	604.5
	1.18	612.5	613.5	605
	1.181	614.5	613.5	608.5
	1.182	612.5	614	608.5
	1.183	613.5	614	604.5
	1.184	615.5	611	606.5
	1.185	615	613	606.5
	1.186	612.5	616.5	608.5
	1.187	613.5	615	605
	1.188	615.5	612	606.5
	1.189	615.5	616.5	607.5
	1.19	615.5	612	607.5
	1.191	614.5	612.5	609.5
	1.192	617	614	606
	1.193	617.5	613	608.5
	1.194	615.5	610.5	610
	1.195	616	615.5	607
	1.196	617.5	614	606.5
	1.197	613.5	617	608.5
	1.198	616	613	610
	1.199	612.5	610	604
	1.2	615.5	612	610
	1.201	618	610	606
	1.202	617	609.5	609
	1.203	620	610.5	606.5
	1.204	617	612.5	603
	1.205	614.5	610	607
	1.206	613.5	616	608.5
	1.207	616.5	613.5	605.5
	1.208	617	612	609.5
	1.209	617	611.5	611.5
	1.21	617.5	610	609.5
	1.211	617.5	612.5	611
	1.212	618	611.5	606.5
	1.213	616.5	610	610
	1.214	618	608	607
	1.215	616.5	610	608
	1.216	617	612	611.5
	1.217	617	609	608.5
	1.218	616.5	608.5	612
	1.219	619	610	609
	1.22	617	608	608.5
	1.221	616.5	607.5	611
	1.222	616.5	609	609.5
	1.223	618.5	610	612.5
	1.224	616.5	611	609
	1.225	619.5	609	610
	1.226	617	610	613
	1.227	617	612.5	612.5
	1.228	617.5	608.5	613.5
	1.229	618.5	603	616
	1.23	617.5	607.5	612
	1.231	615	608.5	614
	1.232	617	608.5	616
	1.233	618	604.5	610
	1.234	615	606.5	611
	1.235	616	609	614.5
	1.236	614.5	609	614
	1.237	618.5	606.5	612.5
	1.238	613.5	610	614
	1.239	617	611.5	616.5
	1.24	618	608.5	615.5
	1.241	612.5	610	615
	1.242	618.5	607	613.5
	1.243	615.5	610	611
	1.244	613.5	607.5	617.5
	1.245	618	607	615.5
	1.246	613.5	607.5	611
	1.247	616.5	609.5	617.5
	1.248	615	607	619
	1.249	618.5	610	616
	1.25	617.5	609	618
	1.251	615.5	607.5	617.5
	1.252	615.5	607	617.5
	1.253	614	608.5	619.5
	1.254	612.5	608.5	618
	1.255	612.5	609	616.5
	1.256	617.5	609	614.5
	1.257	615.5	609	616.5
	1.258	616	606.5	617
	1.259	613	608.5	616
	1.26	615.5	610	616.5
	1.261	611.5	609	617
	1.262	615.5	610.5	615.5
	1.263	618.5	610	614
	1.264	614.5	610	616
	1.265	614	611.5	616.5
	1.266	613.5	610	615.5
	1.267	615.5	610	616.5
	1.268	616.5	608.5	619.5
	1.269	613.5	611	618
	1.27	612.5	610	617
	1.271	612	608.5	618.5
	1.272	614	611	614
	1.273	611.5	610	619.5
	1.274	611.5	608.5	618.5
	1.275	615.5	608.5	619
	1.276	612.5	610	615.5
	1.277	611.5	612.5	618
	1.278	615.5	609.5	617.5
	1.279	613.5	607.5	613
	1.28	615	611	615.5
	1.281	611	615.5	616
	1.282	613.5	610	618.5
	1.283	614	616.5	615.5
	1.284	613.5	612	615.5
	1.285	610.5	611.5	614
	1.286	612	610	612.5
	1.287	613	615.5	616.5
	1.288	614.5	611	616
	1.289	615.5	614	614
	1.29	611	611.5	613.5
	1.291	617	613	616.5
	1.292	613.5	616.5	615.5
	1.293	613	613.5	614.5
	1.294	613.5	615.5	616.5
	1.295	614.5	615.5	615.5
	1.296	614.5	611.5	613
	1.297	614	612.5	617.5
	1.298	613.5	614	610
	1.299	613.5	610	614
	1.3	613.5	613.5	609
	1.301	611.5	613	610
	1.302	612.5	616.5	610
	1.303	615.5	613.5	613.5
	1.304	613	613.5	610.5
	1.305	613	615.5	615.5
	1.306	614.5	614.5	610
	1.307	615.5	615	611
	1.308	614.5	614	614
	1.309	612.5	617.5	613.5
	1.31	611.5	612.5	612
	1.311	613.5	612	611.5
	1.312	613.5	614.5	610
	1.313	611.5	615.5	612
	1.314	613	614	615.5
	1.315	613.5	614	611.5
	1.316	615.5	614.5	612.5
	1.317	615.5	615	613.5
	1.318	613.5	615.5	608.5
	1.319	611.5	615.5	610
	1.32	613	614	611
	1.321	610.5	619.5	612
	1.322	615.5	615.5	613.5
	1.323	611	617.5	609
	1.324	614.5	616.5	608
	1.325	613.5	615.5	611
	1.326	615.5	614	614
	1.327	615.5	613.5	610
	1.328	615	618	611.5
	1.329	615.5	616.5	610
	1.33	616	615.5	608.5
	1.331	612	615.5	612
	1.332	615	619	610
	1.333	611.5	616	612.5
	1.334	612	615	610
	1.335	612.5	615.5	612.5
	1.336	614.5	615.5	609
	1.337	611.5	617	611.5
	1.338	611.5	617.5	610
	1.339	615.5	618	611.5
	1.34	615.5	615.5	610.5
	1.341	613.5	615.5	613.5
	1.342	615.5	614	610
	1.343	612.5	618	609
	1.344	616	615.5	607
	1.345	615	610	611
	1.346	615.5	611	609
	1.347	616	614	610
	1.348	616	617.5	612
	1.349	619.5	612	609
	1.35	615.5	614	615.5
	1.351	613.5	613	613.5
	1.352	614	613	611.5
	1.353	616	615.5	609
	1.354	613	612.5	613.5
	1.355	614.5	612	615
	1.356	611.5	614	609.5
	1.357	615.5	616.5	610.5
	1.358	614	616	612.5
	1.359	615.5	616.5	610
	1.36	613.5	615	614.5
	1.361	614	613	610
	1.362	615.5	608.5	612
	1.363	614.5	609.5	610
	1.364	613	612.5	608.5
	1.365	613.5	611.5	610
	1.366	615.5	611	610.5
	1.367	613.5	615.5	612
	1.368	614.5	614	608.5
	1.369	619.5	610.5	609.5
	1.37	616.5	611	611
	1.371	614.5	610	612.5
	1.372	612.5	608.5	610.5
	1.373	615	607.5	612.5
	1.374	612	613	612.5
	1.375	615	608.5	609
	1.376	611.5	612.5	613
	1.377	619.5	608.5	609.5
	1.378	616	613	610
	1.379	616.5	610	611.5
	1.38	613	610	611.5
	1.381	609.5	613	611.5
	1.382	611.5	611.5	612
	1.383	615.5	608.5	608
	1.384	613.5	611.5	610.5
	1.385	616	612	609
	1.386	612.5	612.5	615.5
	1.387	613.5	610	613.5
	1.388	616	612.5	616
	1.389	615	608.5	614
	1.39	613.5	612	612
	1.391	611	611	613
	1.392	613.5	609.5	615.5
	1.393	613.5	611	612.5
	1.394	618.5	612.5	613.5
	1.395	616.5	611.5	612
	1.396	610.5	609	614
	1.397	611	608.5	614.5
	1.398	612	613.5	608
	1.399	613.5	610	615.5
	1.4	614.5	611.5	611
	1.401	613.5	610	613.5
	1.402	612	608.5	613
	1.403	615	612.5	615.5
	1.404	615.5	610.5	613
	1.405	613	610	609.5
	1.406	613	608	613.5
	1.407	613.5	609	612
	1.408	613.5	608.5	613
	1.409	613.5	610	610
	1.41	613	609	615
	1.411	613	608.5	611
	1.412	617.5	608	612
	1.413	615.5	611.5	610
	1.414	613.5	607.5	613
	1.415	615	610	613
	1.416	615.5	610	613.5
	1.417	617	610	609.5
	1.418	613.5	609	609
	1.419	614.5	613.5	612
	1.42	617	612.5	610
	1.421	613.5	611	613
	1.422	619.5	612.5	612
	1.423	614	609.5	609.5
	1.424	615	607.5	610
	1.425	616	608.5	613
	1.426	617	612	611
	1.427	615.5	610.5	609.5
	1.428	615.5	608	608.5
	1.429	613.5	610	607
	1.43	615	613	610.5
	1.431	617.5	609.5	610
	1.432	616.5	611.5	610
	1.433	614.5	613.5	612
	1.434	616	611	610
	1.435	614.5	613	612.5
	1.436	618	613	610
	1.437	617	615.5	615
	1.438	615.5	615.5	611
	1.439	617	612	610
	1.44	617	611.5	613
	1.441	615.5	613	613
	1.442	617.5	613	613
	1.443	616.5	611	613
	1.444	613.5	613.5	616
	1.445	618.5	613.5	614
	1.446	616.5	615.5	617
	1.447	617	615	616
	1.448	619	612	616.5
	1.449	615.5	612.5	615.5
	1.45	616	619	611.5
	1.451	618	611.5	614
	1.452	614	611	616.5
	1.453	616.5	616.5	613
	1.454	616.5	613.5	615.5
	1.455	616	614.5	615.5
	1.456	612	613.5	618.5
	1.457	616.5	614	615
	1.458	614	613.5	615.5
	1.459	615.5	615.5	621.5
	1.46	616.5	614	618.5
	1.461	615	614.5	619.5
	1.462	614.5	612	621
	1.463	615.5	612	622
	1.464	615.5	612.5	621
	1.465	616	616	618
	1.466	613.5	614	622
	1.467	615.5	612.5	620.5
	1.468	617	616	622
	1.469	617	615.5	622.5
	1.47	616.5	614	623.5
	1.471	614.5	615.5	621
	1.472	612.5	613	618.5
	1.473	615	616	619.5
	1.474	613.5	614.5	621.5
	1.475	618	615.5	623
	1.476	615	616.5	620.5
	1.477	615.5	613.5	621.5
	1.478	619	615	622
	1.479	613.5	613.5	621.5
	1.48	611	612.5	624
	1.481	609.5	616.5	621.5
	1.482	613	610	622
	1.483	613.5	613	618
	1.484	612.5	616.5	621.5
	1.485	614.5	618	621.5
	1.486	613.5	615.5	619.5
	1.487	616.5	618.5	620
	1.488	615	617	619.5
	1.489	613.5	620.5	618.5
	1.49	614.5	622	619.5
	1.491	613.5	618	620.5
	1.492	617	620	617.5
	1.493	613.5	618.5	620
	1.494	614.5	619.5	619
	1.495	612.5	619.5	618.5
	1.496	613.5	620.5	620.5
	1.497	614.5	619	618.5
	1.498	616.5	618.5	618.5
	1.499	613.5	619	616
	1.5	616.5	623.5	617.5
	1.501	613	620	616
	1.502	613.5	620.5	614
	1.503	613.5	621.5	618.5
	1.504	616.5	620	615.5
	1.505	613.5	623.5	615
	1.506	615.5	624	617.5
	1.507	613.5	620.5	615.5
	1.508	615.5	622	614.5
	1.509	613	621.5	616
	1.51	610	621	615.5
	1.511	612.5	623	617
	1.512	614.5	622.5	615.5
	1.513	611	627	613
	1.514	614	623.5	614
	1.515	613.5	624.5	614.5
	1.516	611	625	613.5
	1.517	613	625	613.5
	1.518	613.5	623	613.5
	1.519	613.5	624	612
	1.52	612.5	625.5	613.5
	1.521	612.5	627	611
	1.522	616	625.5	610
	1.523	612.5	624.5	616.5
	1.524	613.5	623.5	614
	1.525	609.5	624	612.5
	1.526	613.5	629.5	608.5
	1.527	613.5	624	609.5
	1.528	614.5	627.5	609
	1.529	610	629	614.5
	1.53	612.5	629	610
	1.531	613.5	626	615.5
	1.532	613.5	626	612
	1.533	614.5	628	613
	1.534	609.5	625	613
	1.535	611.5	625.5	617
	1.536	612	626.5	610.5
	1.537	610.5	631.5	619.5
	1.538	612.5	624.5	615.5
	1.539	615.5	628	613.5
	1.54	613.5	630.5	615.5
	1.541	609.5	631	614
	1.542	614.5	629	620.5
	1.543	612	630.5	617.5
	1.544	611.5	633	620
	1.545	612.5	630.5	619
	1.546	611.5	631	621.5
	1.547	612	633	619.5
	1.548	609	630.5	622.5
	1.549	611.5	632	621
	1.55	611	629.5	621.5
	1.551	611.5	635	621
	1.552	612	632.5	624.5
	1.553	611.5	631.5	622.5
	1.554	613.5	630.5	627
	1.555	612	634.5	623
	1.556	607.5	631.5	626
	1.557	614	634.5	624.5
	1.558	609.5	633.5	623
	1.559	608	633	624
	1.56	608	636	622
	1.561	610	634	624
	1.562	612	631	621.5
	1.563	609	636	625
	1.564	608.5	636	628
	1.565	609.5	638	624.5
	1.566	610	636.5	628
	1.567	614	637.5	625.5
	1.568	607	636.5	625.5
	1.569	611	636	627
	1.57	610.5	638.5	626
	1.571	615.5	640	627
	1.572	613	642	625
	1.573	611.5	638	622.5
	1.574	608.5	634	623.5
	1.575	611.5	638	625
	1.576	612.5	637.5	622
	1.577	611.5	639	623
	1.578	613	643	623
	1.579	610.5	640	619.5
	1.58	611	637	619.5
	1.581	613.5	639	623
	1.582	611.5	636	616.5
	1.583	610.5	639.5	621.5
	1.584	613	635.5	619
	1.585	609	636	620
	1.586	613.5	639.5	619
	1.587	613.5	638	618
	1.588	615.5	639	620.5
	1.589	615.5	636	620.5
	1.59	615.5	638	617.5
	1.591	611.5	634.5	619.5
	1.592	614.5	633.5	616
	1.593	613	635.5	618.5
	1.594	613.5	636.5	615.5
	1.595	615.5	634	619.5
	1.596	616.5	631.5	615.5
	1.597	618.5	633	616.5
	1.598	613.5	630.5	618
	1.599	617	635	613.5
	1.6	618	630	615.5
	1.601	615	628.5	615
	1.602	616	630	612
	1.603	616.5	628.5	614
	1.604	618	628.5	615.5
	1.605	618.5	629	613
	1.606	616.5	627.5	612.5
	1.607	617	625	614
	1.608	617.5	623	614
	1.609	616.5	625	616
	1.61	619	624	612
	1.611	616	620	614
	1.612	621.5	620.5	613
	1.613	619	618	612.5
	1.614	616.5	622.5	610
	1.615	615.5	622	612
	1.616	619.5	616.5	613.5
	1.617	620	615	610
	1.618	616.5	616.5	609.5
	1.619	622	616.5	613.5
	1.62	616	615.5	607.5
	1.621	619.5	615.5	608
	1.622	619.5	612	606.5
	1.623	618.5	613.5	607.5
	1.624	617	611	605
	1.625	619	612.5	606.5
	1.626	620	613	606
	1.627	620	609.5	604
	1.628	622	610	601.5
	1.629	613.5	608	603
	1.63	618.5	609	601.5
	1.631	620.5	608.5	600.5
	1.632	619.5	609	601.5
	1.633	620.5	608.5	599
	1.634	620	607.5	600.5
	1.635	617.5	603	598
	1.636	618	604.5	598.5
	1.637	618.5	601.5	596
	1.638	620	603	597
	1.639	615.5	601.5	595.5
	1.64	621.5	600	595.5
	1.641	621	600.5	592
	1.642	618	596	595
	1.643	616	600	591.5
	1.644	617	597.5	594.5
	1.645	618	594.5	593.5
	1.646	616	596	590.5
	1.647	620	592.5	587.5
	1.648	617	593	589.5
	1.649	620	590.5	590.5
	1.65	616.5	589	591
	1.651	616.5	589	591
	1.652	615.5	589.5	587.5
	1.653	616	586	589.5
	1.654	616	583.5	590.5
	1.655	615.5	582.5	587
	1.656	617.5	583.5	590
	1.657	620	585.5	588
	1.658	614.5	581	590.5
	1.659	615.5	579.5	591
	1.66	616.5	578	583
	1.661	616.5	581	586
	1.662	619	576.5	587.5
	1.663	616	577.5	586
	1.664	613.5	578	588.5
	1.665	616	575.5	586.5
	1.666	617.5	573.5	585.5
	1.667	615.5	571.5	588
	1.668	617	573.5	587
	1.669	619	573	588
	1.67	616.5	572	584
	1.671	615.5	568	582
	1.672	616	567.5	583.5
	1.673	616	566	588.5
	1.674	616	563.5	587
	1.675	616	562	584
	1.676	616.5	559.5	581
	1.677	613.5	560.5	586.5
	1.678	619	558	584
	1.679	614.5	555	578.5
	1.68	617.5	559	581
	1.681	616.5	552.5	580.5
	1.682	617	550	581
	1.683	617	550.5	579
	1.684	614.5	551	579
	1.685	616	548.5	579.5
	1.686	618	546	576
	1.687	617	545.5	572
	1.688	615.5	538	576.5
	1.689	619.5	545.5	575
	1.69	618.5	537	575.5
	1.691	620	540	572.5
	1.692	621	535	573.5
	1.693	617	537	569
	1.694	618	532.5	569
	1.695	619	533	568
	1.696	619	526.5	564.5
	1.697	616	527.5	565.5
	1.698	618.5	528.5	566
	1.699	616.5	526.5	563
	1.7	619.5	525.5	560.5
	1.701	619.5	526.5	557.5
	1.702	616.5	522.5	556.5
	1.703	620.5	519	555
	1.704	618	519	554
	1.705	619.5	517	553.5
	1.706	613.5	516.5	550.5
	1.707	617.5	518	552
	1.708	619.5	517	547.5
	1.709	616.5	513	547
	1.71	617	511.5	547
	1.711	621	513	543
	1.712	616	509	540.5
	1.713	615.5	504	537.5
	1.714	618	506	534.5
	1.715	619	504	533.5
	1.716	617	502	529
	1.717	617	502	527
	1.718	622	499.5	524.5
	1.719	619	497.5	522.5
	1.72	622.5	497.5	517.5
	1.721	621	496	514
	1.722	617.5	489	512.5
	1.723	620	492.5	505
	1.724	621.5	491	507.5
	1.725	619.5	491	499
	1.726	618.5	488	493.5
	1.727	618	482.5	491
	1.728	618	481	487
	1.729	619.5	479	484
	1.73	620	478	480
	1.731	618	478	470
	1.732	622.5	472	468
	1.733	620	466	461
	1.734	619	468	456
	1.735	615	463	450
	1.736	622	459	445.5
	1.737	619.5	455	438.5
	1.738	620	452	432
	1.739	620	447	426.5
	1.74	619.5	443.5	420.5
	1.741	616	444	413.5
	1.742	620.5	436	409.5
	1.743	615.5	431.5	402.5
	1.744	616	424.5	399
	1.745	621	423.5	393
	1.746	613.5	416.5	384.5
	1.747	618	411.5	375.5
	1.748	618	410.5	373
	1.749	621	403.5	368.5
	1.75	617.5	401	359.5
	1.751	619	398	357
	1.752	619.5	389	348.5
	1.753	616.5	383	345
	1.754	617.5	383	340
	1.755	619	374.5	335
	1.756	615.5	371.5	333
	1.757	615.5	364.5	330
	1.758	615.5	360.5	319.5
	1.759	614.5	357.5	317
	1.76	615.5	348.5	315
	1.761	616.5	345.5	311
	1.762	616	340.5	305
	1.763	612.5	335	300.5
	1.764	614.5	331	296.5
	1.765	613.5	329	294
	1.766	615.5	321.5	290.5
	1.767	611.5	317.5	285.5
	1.768	616	310	284
	1.769	613.5	308.5	282
	1.77	613.5	302.5	280
	1.771	614	299	273.5
	1.772	614.5	296	274.5
	1.773	613.5	290.5	269
	1.774	611.5	285	265.5
	1.775	609.5	283.5	267.5
	1.776	612	280.5	266
	1.777	609	274.5	259
	1.778	611.5	273	253
	1.779	611.5	268	252
	1.78	611.5	268	250.5
	1.781	610.5	261	245.5
	1.782	613	260	243
	1.783	612.5	257.5	238
	1.784	611.5	256	239.5
	1.785	615	250.5	236.5
	1.786	613.5	249	233.5
	1.787	612	246	233.5
	1.788	612	247.5	231.5
	1.789	613.5	239.5	225.5
	1.79	613.5	239.5	225
	1.791	612.5	239	221.5
	1.792	613.5	236	220
	1.793	613.5	230.5	212
	1.794	611	232.5	212
	1.795	612	230.5	213
	1.796	613.5	228.5	205
	1.797	614.5	229	201
	1.798	612.5	223.5	196.5
	1.799	615.5	223	198
	1.8	613.5	221.5	191
	1.801	613	217.5	189
	1.802	613.5	218	185.5
	1.803	613.5	213	181.5
	1.804	613.5	212	179
	1.805	615.5	211	175
	1.806	611.5	207	171.5
	1.807	619.5	206	170
	1.808	616.5	202	165.5
	1.809	618.5	200.5	162.5
	1.81	617	201.5	162
	1.811	616	198	157
	1.812	616.5	196.5	155.5
	1.813	616	194	152
	1.814	618.5	191	148.5
	1.815	617.5	192	148
	1.816	616	184.5	143.5
	1.817	618.5	186	139.5
	1.818	619.5	182	139
	1.819	620	177.5	143
	1.82	616.5	179.5	135
	1.821	620	177.5	130.5
	1.822	620	178.5	131
	1.823	619	171	130
	1.824	622	171	130
	1.825	617.5	168.5	127.5
	1.826	622	165.5	127.5
	1.827	616.5	168	124.5
	1.828	621	164	124
	1.829	620.5	160.5	122.5
	1.83	621.5	159.5	121
	1.831	615.5	159	120
	1.832	620	155.5	119
	1.833	619.5	156.5	121.5
	1.834	618	152	119
	1.835	616.5	153.5	117
	1.836	620.5	150.5	118.5
	1.837	619.5	149.5	118
	1.838	619	149.5	115
	1.839	620	145.5	111.5
	1.84	617	145	114
	1.841	621.5	142	114
	1.842	616.5	143.5	112.5
	1.843	617.5	141	115.5
	1.844	616.5	141	116
	1.845	618	140.5	114
	1.846	615.5	138	111.5
	1.847	615.5	134.5	112
	1.848	612.5	134.5	111.5
	1.849	615	135.5	113.5
	1.85	615	135	113.5
	1.851	612	133	111.5
	1.852	609	137	113.5
	1.853	609.5	135.5	114.5
	1.854	613.5	133	112.5
	1.855	608.5	130.5	113
	1.856	608.5	130	113
	1.857	609.5	133	110
	1.858	611.5	134	114.5
	1.859	608	132	113.5
	1.86	609	133.5	114.5
	1.861	608.5	134	116.5
	1.862	608.5	129.5	114.5
	1.863	610.5	132	115
	1.864	608.5	131	113
	1.865	611.5	134	116
	1.866	607.5	130	116
	1.867	608	133	118.5
	1.868	605	136.5	117.5
	1.869	609	133.5	121.5
	1.87	603	135.5	119
	1.871	603	138	118
	1.872	603	136.5	124
	1.873	605	138	123
	1.874	603.5	138.5	122
	1.875	604	136.5	123
	1.876	603.5	139.5	125
	1.877	602	139.5	123
	1.878	601	142	124.5
	1.879	601.5	138	126.5
	1.88	599.5	142	128.5
	1.881	598.5	144.5	130.5
	1.882	598.5	142.5	130
	1.883	595.5	143	129.5
	1.884	597	144.5	129
	1.885	596.5	148.5	133.5
	1.886	598.5	146	136
	1.887	593.5	151.5	133
	1.888	594.5	148	134.5
	1.889	591.5	155	134
	1.89	591.5	151	136.5
	1.891	592.5	153	144.5
	1.892	593.5	154	140.5
	1.893	595	155.5	138.5
	1.894	592	157	139
	1.895	588	159.5	141
	1.896	587	160.5	143
	1.897	585.5	164	150
	1.898	585	164	147
	1.899	586	163.5	150
	1.9	584	164	147.5
	1.901	581.5	166	152
	1.902	582.5	164	153.5
	1.903	581	168.5	156.5
	1.904	581	169	159
	1.905	580.5	168.5	162.5
	1.906	578.5	171.5	165.5
	1.907	576.5	171.5	162
	1.908	574.5	170	164.5
	1.909	576	171	169
	1.91	574.5	172	171
	1.911	570.5	171	176
	1.912	573.5	171	177.5
	1.913	567	172.5	179
	1.914	570.5	170.5	179.5
	1.915	566.5	171.5	183.5
	1.916	564	172	184
	1.917	561.5	172	184.5
	1.918	561.5	169	189.5
	1.919	561.5	175	189.5
	1.92	561.5	173	192.5
	1.921	554.5	173	197
	1.922	558	177.5	199.5
	1.923	556	171	199.5
	1.924	557.5	175	203.5
	1.925	553.5	179.5	208
	1.926	554	176.5	211.5
	1.927	550.5	177.5	214
	1.928	551.5	179	217
	1.929	547	183	222
	1.93	547.5	179.5	225
	1.931	547.5	182.5	224
	1.932	548	183	228.5
	1.933	545.5	186	231
	1.934	545	186	233
	1.935	544.5	188.5	240
	1.936	541.5	190.5	241
	1.937	539	192.5	243
	1.938	533.5	190.5	248
	1.939	535	191.5	252.5
	1.94	535.5	198	255
	1.941	533.5	198	265
	1.942	528.5	200.5	266.5
	1.943	529.5	204	270.5
	1.944	528	204.5	275
	1.945	526.5	205	275.5
	1.946	526	208	280
	1.947	519	211.5	286.5
	1.948	518.5	210.5	292.5
	1.949	512	212	294
	1.95	513	217.5	300.5
	1.951	512	223	299
	1.952	511	225	307.5
	1.953	506	229.5	310
	1.954	504.5	231.5	313.5
	1.955	499.5	234.5	318.5
	1.956	498	239	320
	1.957	494.5	243	321.5
	1.958	495.5	250	326
	1.959	489	252	330.5
	1.96	488	255.5	332.5
	1.961	486.5	261	336
	1.962	487.5	263.5	341
	1.963	478.5	270.5	343.5
	1.964	475	274	348
	1.965	473	274.5	347
	1.966	470.5	280	353.5
	1.967	467	288	355.5
	1.968	459	294	357.5
	1.969	461	295	365.5
	1.97	454.5	301.5	366.5
	1.971	449.5	305	371.5
	1.972	449	313	374.5
	1.973	444	317.5	380
	1.974	440.5	321	382.5
	1.975	434.5	328.5	386
	1.976	436	333.5	392.5
	1.977	427	340	392.5
	1.978	423	340	399
	1.979	417	351.5	401
	1.98	416	355	407
	1.981	406	362.5	408
	1.982	402.5	369	409.5
	1.983	397	376	412.5
	1.984	393.5	375	420
	1.985	388	386.5	424
	1.986	386	388	431
	1.987	376	400.5	433.5
	1.988	371	407	439.5
	1.989	368	416.5	443
	1.99	360	425	449.5
	1.991	358	430	454.5
	1.992	348.5	436	459.5
	1.993	345.5	445.5	470.5
[truncated: 5,006 more rows]

## Sheet: G
DataTypeVer2.0	Time	Fz	Fz	Fz
NumberOfData		15000	15000	15000
PreTriggerData		0	0	0
SamplingTime[ms]		1	1	1
DataLabel		Z1:CMJ	Z2:CMJ	Z3:CMJ
DataUnit	sec	N	N	N
	0	668	669.5	675
	0.001	673	669.5	678
	0.002	670.5	669.5	677
	0.003	671	668	674.5
	0.004	670	671.5	675
	0.005	672	669.5	676.5
	0.006	670	670	675
	0.007	670	669	672.5
	0.008	672	673.5	675.5
	0.009	672	671.5	675.5
	0.01	670.5	668.5	673
	0.011	671	670	673.5
	0.012	671	672	672.5
	0.013	670.5	675.5	671
	0.014	671	672	675.5
	0.015	673.5	673.5	673.5
	0.016	673	674.5	677
	0.017	673	670	677
	0.018	670	673.5	677
	0.019	670.5	674	670
	0.02	674.5	673.5	676.5
	0.021	670.5	673.5	679
	0.022	676	672.5	673.5
	0.023	671.5	676.5	671.5
	0.024	673.5	671.5	675
	0.025	672	674.5	671
	0.026	670.5	675	673.5
	0.027	672.5	672.5	674.5
	0.028	673	674.5	672
	0.029	669.5	674.5	674
	0.03	673.5	672.5	674
	0.031	672.5	673.5	677.5
	0.032	672.5	674.5	675
	0.033	672	672	674
	0.034	674	672	676
	0.035	672.5	675	675
	0.036	676.5	670	675
	0.037	673.5	677	677
	0.038	670.5	675.5	670
	0.039	673	674	672.5
	0.04	669.5	674	673.5
	0.041	670.5	674	671.5
	0.042	674.5	677	672.5
	0.043	673	672.5	675.5
	0.044	670.5	674.5	671.5
	0.045	672	674.5	670.5
	0.046	672	675	674.5
	0.047	676.5	672.5	670.5
	0.048	674.5	672	673
	0.049	670.5	677	671
	0.05	672	676	673.5
	0.051	671.5	676.5	675
	0.052	674.5	675	671.5
	0.053	672.5	674.5	670
	0.054	676.5	675.5	673
	0.055	673.5	677	672.5
	0.056	676	673	670
	0.057	672	674	674
	0.058	673	676	673
	0.059	673	673.5	670.5
	0.06	669	674.5	671
	0.061	674	675	671.5
	0.062	673	673.5	671
	0.063	674	674.5	669.5
	0.064	671.5	675.5	672.5
	0.065	672.5	674	671.5
	0.066	673.5	675.5	671.5
	0.067	673.5	674.5	670.5
	0.068	671.5	672.5	672.5
	0.069	674	674.5	671
	0.07	670	671.5	670
	0.071	673.5	674	671.5
	0.072	674.5	673.5	672.5
	0.073	675.5	675	671.5
	0.074	670	674.5	671
	0.075	675.5	671.5	670
	0.076	674.5	673	669.5
	0.077	671.5	671	670.5
	0.078	673.5	672.5	672
	0.079	670	671.5	671.5
	0.08	674.5	673	670.5
	0.081	676.5	672.5	670
	0.082	673.5	672.5	669.5
	0.083	671.5	674	671
	0.084	671.5	675.5	670
	0.085	676	670.5	673.5
	0.086	675	669.5	668.5
	0.087	672	672.5	671
	0.088	674	672	670
	0.089	675.5	670	671
	0.09	673.5	672.5	670
	0.091	673	673	671.5
	0.092	675.5	675.5	672.5
	0.093	672	677	669.5
	0.094	674.5	670	673.5
	0.095	675.5	671	672
	0.096	672.5	674.5	668
	0.097	674	674	670.5
	0.098	673	675.5	670.5
	0.099	671	671	670.5
	0.1	670	673.5	668.5
	0.101	672.5	671.5	668.5
	0.102	670.5	670.5	670.5
	0.103	670.5	673	673
	0.104	670.5	673.5	671.5
	0.105	673	673.5	673.5
	0.106	668	675	670.5
	0.107	676.5	674	672
	0.108	671.5	675.5	674.5
	0.109	669.5	672.5	670.5
	0.11	669	671.5	672.5
	0.111	673	675	669.5
	0.112	668.5	672	669
	0.113	671.5	671	672
	0.114	672.5	672.5	671.5
	0.115	671	674.5	671.5
	0.116	671.5	674.5	675
	0.117	671.5	673	673.5
	0.118	675	673.5	673
	0.119	669	674.5	675.5
	0.12	668	670	670.5
	0.121	666.5	675	670.5
	0.122	664	675.5	673.5
	0.123	670	671.5	672.5
	0.124	668	673	671.5
	0.125	669	674	673
	0.126	670	670	673.5
	0.127	668	672	674.5
	0.128	669.5	675.5	671
	0.129	669	670.5	673.5
	0.13	670	673.5	676
	0.131	667.5	672	672
	0.132	666	677	672.5
	0.133	669	669.5	673.5
	0.134	670	671.5	671.5
	0.135	668	673	671.5
	0.136	667	670.5	672.5
	0.137	670	672.5	674
	0.138	670	671	674
	0.139	669	670.5	673
	0.14	667	670	676
	0.141	668	669	672.5
	0.142	669	669.5	676.5
	0.143	669.5	670	672.5
	0.144	669	670.5	675.5
	0.145	670.5	671	673.5
	0.146	670	670	677.5
	0.147	666.5	670.5	677
	0.148	666.5	671	678.5
	0.149	672	671.5	673
	0.15	670	672.5	675.5
	0.151	670	670	676
	0.152	668.5	669	675.5
	0.153	669	671	673.5
	0.154	669.5	671.5	670
	0.155	671	668	676.5
	0.156	669.5	673	673
	0.157	670	670	672.5
	0.158	670.5	671.5	676.5
	0.159	670	668	676.5
	0.16	670	673	672.5
	0.161	670.5	670	672
	0.162	670.5	670	677.5
	0.163	670	671	674.5
	0.164	670.5	671.5	676.5
	0.165	670	673	676.5
	0.166	667.5	669	678
	0.167	671	674.5	673
	0.168	671.5	667.5	674.5
	0.169	670	670	676
	0.17	670.5	672.5	673.5
	0.171	673.5	669	675
	0.172	667.5	671	674.5
	0.173	671	672.5	677
	0.174	671.5	667.5	676
	0.175	672.5	671.5	675.5
	0.176	671	671	675
	0.177	669	673.5	673
	0.178	677	671.5	675.5
	0.179	671.5	670.5	675
	0.18	675.5	673	676
	0.181	675.5	669.5	675
	0.182	672.5	670	675.5
	0.183	671	670.5	677
	0.184	672.5	670	676.5
	0.185	671.5	669	677
	0.186	670	670	674.5
	0.187	677	673	675.5
	0.188	670	671	674.5
	0.189	676	670.5	673
	0.19	674	671	674
	0.191	677	670.5	672.5
	0.192	676.5	672.5	676.5
	0.193	674.5	670.5	674
	0.194	676	668.5	676.5
	0.195	674	670	672.5
	0.196	673.5	671	677
	0.197	677	671.5	677
	0.198	671.5	671	677.5
	0.199	674	669	675
	0.2	674.5	670	675.5
	0.201	674.5	670	672.5
	0.202	675	671.5	675
	0.203	672	669.5	675
	0.204	676	670	672.5
	0.205	672	671.5	673
	0.206	676	673	673.5
	0.207	674.5	669.5	674.5
	0.208	677.5	674	675
	0.209	676.5	673.5	674.5
	0.21	673.5	676.5	673.5
	0.211	673.5	672.5	669
	0.212	676.5	674	673
	0.213	674	673.5	674.5
	0.214	673.5	675	674.5
	0.215	672.5	670.5	673.5
	0.216	672	675.5	671.5
	0.217	671.5	673.5	672.5
	0.218	671.5	676	675
	0.219	673.5	674.5	675
	0.22	672.5	673.5	670.5
	0.221	672.5	675.5	674
	0.222	672.5	672.5	671.5
	0.223	673	676.5	672.5
	0.224	672.5	673.5	673
	0.225	672	670.5	673.5
	0.226	671	677.5	671
	0.227	672.5	672	670
	0.228	671	675.5	673
	0.229	672.5	673	672
	0.23	669.5	675.5	670
	0.231	673.5	677	670
	0.232	670.5	675	668
	0.233	670.5	676.5	673.5
	0.234	672.5	677	670
	0.235	671	675	671.5
	0.236	669.5	676.5	671.5
	0.237	670	673	669
	0.238	672	679	672
	0.239	671	677	668.5
	0.24	670.5	677	670
	0.241	671	677	671
	0.242	670.5	674.5	669
	0.243	669	674.5	671.5
	0.244	669.5	672.5	669.5
	0.245	666.5	674.5	670
	0.246	672.5	679	671
	0.247	670	677	669
	0.248	670	674	669
	0.249	669.5	678.5	670
	0.25	669.5	676	671
	0.251	668	675.5	669
	0.252	669	675.5	670
	0.253	670	674.5	669.5
	0.254	669.5	674	666.5
	0.255	672.5	672	669.5
	0.256	670.5	677	671.5
	0.257	668	674	674
	0.258	671	674	669.5
	0.259	672	675.5	670
	0.26	669.5	677	669
	0.261	670	671	670
	0.262	671	673	672.5
	0.263	669.5	675	668
	0.264	671	676	670
	0.265	669	674.5	669.5
	0.266	670	672.5	670
	0.267	671	672.5	669.5
	0.268	670	672	671
	0.269	666	674	669.5
	0.27	669.5	678	669.5
	0.271	670.5	675.5	672
	0.272	670	674.5	667.5
	0.273	671.5	672	669.5
	0.274	669	670	669.5
	0.275	671.5	671	669
	0.276	670	674	671
	0.277	670	673	668.5
	0.278	667	672.5	667.5
	0.279	672	674	670
	0.28	668	672	673
	0.281	669	674	671
	0.282	670.5	670	670.5
	0.283	673.5	672	667.5
	0.284	670	671	669
	0.285	670	673.5	670
	0.286	670	671.5	673
	0.287	671	671.5	670
	0.288	667	670.5	671.5
	0.289	673.5	672	670
	0.29	670	670	671
	0.291	670	669.5	670
	0.292	673.5	672.5	672
	0.293	669.5	669.5	670.5
	0.294	669	672.5	669
	0.295	670	669	669.5
	0.296	670.5	671.5	670
	0.297	670	672	668.5
	0.298	670.5	671	672
	0.299	670.5	671	671
	0.3	671	671.5	670.5
	0.301	670	668.5	671.5
	0.302	671	670.5	670
	0.303	671	671.5	671
	0.304	672.5	668	672
	0.305	671	669	670
	0.306	670	670	674
	0.307	674.5	670	674.5
	0.308	672	666	671.5
	0.309	674.5	671.5	673
	0.31	670.5	669	669
	0.311	668.5	669.5	673
	0.312	667.5	668.5	671.5
	0.313	672.5	668	670
	0.314	671	669	670.5
	0.315	671.5	669	670
	0.316	670	667.5	670
	0.317	673	670	671
	0.318	672.5	666.5	673
	0.319	670	669	675
	0.32	672.5	669	673
	0.321	671.5	669	675
	0.322	673.5	671	671.5
	0.323	671	667	674.5
	0.324	670.5	672.5	669
	0.325	673.5	664	671.5
	0.326	671	671	672.5
	0.327	669.5	667.5	676
	0.328	673	670	674.5
	0.329	671.5	668.5	673.5
	0.33	674.5	665.5	676.5
	0.331	671.5	669	675
	0.332	670.5	669.5	674
	0.333	670.5	671	673
	0.334	672.5	669	672.5
	0.335	671.5	670	679
	0.336	669	665.5	676.5
	0.337	670	667	671
	0.338	671	668	673
	0.339	671	670	673
	0.34	668	669.5	670.5
	0.341	671	669	673.5
	0.342	665.5	665	674.5
	0.343	670.5	666.5	674
	0.344	672.5	670	676.5
	0.345	669.5	667	676
	0.346	670	666	674.5
	0.347	670	663.5	673.5
	0.348	669	667.5	676.5
	0.349	670	670	673.5
	0.35	671	667.5	676.5
	0.351	673	667	677
	0.352	672.5	667.5	674
	0.353	668.5	664	676
	0.354	670.5	665	675.5
	0.355	669	666	673.5
	0.356	667	666.5	675.5
	0.357	670	669	675
	0.358	669.5	670	675
	0.359	667.5	670	677
	0.36	675	668.5	677
	0.361	673	669.5	675.5
	0.362	675	671	672
	0.363	670.5	668.5	676
	0.364	671.5	667	676
	0.365	671.5	669.5	677
	0.366	673.5	668	674
	0.367	670.5	670	675.5
	0.368	671.5	670.5	674
	0.369	671	668.5	674.5
	0.37	671.5	667	674.5
	0.371	670	671.5	676.5
	0.372	671	670	674
	0.373	671.5	671.5	678
	0.374	672.5	669.5	674
	0.375	669.5	671	677.5
	0.376	670	668	676
	0.377	673.5	671.5	677
	0.378	670	670	677
	0.379	673.5	671.5	676.5
	0.38	674.5	673	676
	0.381	673	674	675
	0.382	671.5	670.5	677
	0.383	673	671	675.5
	0.384	670	670.5	673.5
	0.385	674	670.5	673.5
	0.386	672	673	672
	0.387	675	670	673
	0.388	674	670.5	673.5
	0.389	671.5	671.5	672.5
	0.39	674	672.5	675
	0.391	672.5	669.5	677.5
	0.392	672.5	672	675.5
	0.393	673.5	671.5	675.5
	0.394	671.5	674	676
	0.395	674	670	672.5
	0.396	672.5	672.5	671
	0.397	672.5	670	671.5
	0.398	673	671.5	673.5
	0.399	671.5	672	669.5
	0.4	670.5	674	670.5
	0.401	672	673.5	673
	0.402	673.5	673.5	671
	0.403	670	671.5	674
	0.404	672	674	667.5
	0.405	671.5	673.5	672.5
	0.406	671.5	675	675
	0.407	672.5	673.5	671
	0.408	672.5	672.5	672.5
	0.409	671	671.5	670
	0.41	671	673	670
	0.411	672.5	672	670
	0.412	671.5	671.5	671.5
	0.413	673.5	669	672
	0.414	670.5	671	673.5
	0.415	672.5	671	669
	0.416	675	675	670
	0.417	671	670.5	671
	0.418	674.5	673	671
	0.419	674	673.5	672.5
	0.42	673	671.5	671.5
	0.421	670	671	669.5
	0.422	673	673.5	670
	0.423	671.5	671.5	669.5
	0.424	672	671.5	666.5
	0.425	670	673.5	669.5
	0.426	670	674	670
	0.427	668	673	669
	0.428	675.5	670	663.5
	0.429	669.5	676	670.5
	0.43	671.5	671.5	669.5
	0.431	670	672	669.5
	0.432	676.5	674	672.5
	0.433	670	673.5	673
	0.434	672.5	674	670
	0.435	672.5	673.5	670
	0.436	674	675.5	671.5
	0.437	674.5	672.5	671
	0.438	671.5	677	669.5
	0.439	672	673.5	669.5
	0.44	675.5	673.5	670.5
	0.441	674.5	676.5	667.5
	0.442	675.5	673	668.5
	0.443	673	672.5	668.5
	0.444	673	672	667
	0.445	672	669.5	671.5
	0.446	677	674.5	667.5
	0.447	673.5	673	665
	0.448	675.5	674.5	670
	0.449	676.5	672	665.5
	0.45	677	673.5	666
	0.451	677	673.5	670
	0.452	678.5	673	667
	0.453	679	673	668
	0.454	679	669	668.5
	0.455	679	671.5	667.5
	0.456	682	674	672
	0.457	680	670.5	667.5
	0.458	681	669.5	667.5
	0.459	684	672	669.5
	0.46	684	669	667
	0.461	688	669.5	668
	0.462	687	672.5	668
	0.463	688	672.5	668.5
	0.464	686.5	673.5	666.5
	0.465	686.5	669.5	668
	0.466	686	671.5	667
	0.467	688	673	669.5
	0.468	685.5	673	669
	0.469	690.5	669	668.5
	0.47	690.5	671.5	670
	0.471	689.5	671.5	670.5
	0.472	690.5	673.5	671
	0.473	692.5	673.5	670.5
	0.474	691	669.5	665.5
	0.475	690.5	670	667
	0.476	691	672	670
	0.477	693	670	668
	0.478	690.5	672	670
	0.479	696	671.5	665.5
	0.48	696	672.5	670.5
	0.481	697.5	670	671
	0.482	698	669	668
	0.483	696	670.5	668
	0.484	697.5	670.5	670
	0.485	697.5	671.5	668
	0.486	696.5	674	670
	0.487	697.5	671	671.5
	0.488	699	670	669.5
	0.489	697	669.5	672
	0.49	699	667.5	669.5
	0.491	697.5	671.5	670
	0.492	699.5	669.5	667
	0.493	699.5	668.5	668
	0.494	696	668.5	669
	0.495	701	670.5	668.5
	0.496	699	667	669
	0.497	702.5	670	670.5
	0.498	699	670	670
	0.499	700	670	668.5
	0.5	697	668.5	670.5
	0.501	698.5	665	668
	0.502	695	667.5	674
	0.503	700.5	671	669.5
	0.504	699.5	665.5	668.5
	0.505	697	668	669
	0.506	697.5	666	666.5
	0.507	697	664	671.5
	0.508	695.5	670	667.5
	0.509	694	665	670.5
	0.51	696.5	667	670.5
	0.511	697	670	669
	0.512	696.5	668	666.5
	0.513	691.5	666.5	668
	0.514	694	667	670.5
	0.515	692.5	669	668
	0.516	691	662	672
	0.517	686.5	666.5	670.5
	0.518	694	670	669
	0.519	696.5	667.5	668
	0.52	690.5	667.5	669.5
	0.521	690.5	662.5	668.5
	0.522	685.5	664	668
	0.523	687	667	670.5
	0.524	688	665.5	670.5
	0.525	683.5	665.5	670.5
	0.526	688	664	672
	0.527	684	666.5	668
	0.528	683.5	668	667.5
	0.529	679	665.5	671
	0.53	685.5	667	674
	0.531	684	663.5	670.5
	0.532	681.5	666.5	671.5
	0.533	678	667.5	667
	0.534	677.5	665.5	670.5
	0.535	677	665.5	673.5
	0.536	677	665.5	670
	0.537	679	663.5	670.5
	0.538	681	664	670.5
	0.539	676.5	664	673.5
	0.54	677	665	675
	0.541	676.5	665	670
	0.542	673	667	674
	0.543	670.5	664	673
	0.544	673.5	665.5	668
	0.545	670	665.5	671.5
	0.546	674	666	671.5
	0.547	670	662.5	672.5
	0.548	673	669.5	677
	0.549	671.5	665.5	670
	0.55	670.5	668.5	673.5
	0.551	667.5	664	671.5
	0.552	671	666	671.5
	0.553	663	665.5	670
	0.554	664	667.5	670.5
	0.555	665	669.5	670.5
	0.556	661.5	667	674
	0.557	664	667	670.5
	0.558	662	667	673.5
	0.559	664	668	671.5
	0.56	659	667	672.5
	0.561	660	668	673
	0.562	661	668.5	673.5
	0.563	658.5	670.5	674
	0.564	659.5	669	672.5
	0.565	653	670.5	670.5
	0.566	657.5	669.5	673.5
	0.567	655	670	672.5
	0.568	654.5	668	671.5
	0.569	654	666.5	674
	0.57	654	670.5	670.5
	0.571	649.5	672	675
	0.572	653.5	673.5	674.5
	0.573	653	673.5	670
	0.574	649.5	672	673.5
	0.575	649.5	674.5	672.5
	0.576	646.5	669.5	670
	0.577	649.5	670.5	673
	0.578	645.5	671.5	671
	0.579	643.5	672.5	670.5
	0.58	644.5	674	674.5
	0.581	647	670.5	669.5
	0.582	642.5	673	670.5
	0.583	644	675.5	675
	0.584	643.5	673.5	672.5
	0.585	641	675.5	675.5
	0.586	643	674	674
	0.587	640.5	676.5	675.5
	0.588	639	673.5	673
	0.589	636.5	674.5	672.5
	0.59	638.5	675	673.5
	0.591	640	678	671
	0.592	634.5	676.5	674.5
	0.593	634.5	679	672.5
	0.594	637	674.5	673.5
	0.595	634.5	676	674.5
	0.596	630	677	671.5
	0.597	631	677	674
	0.598	628.5	677.5	675.5
	0.599	628.5	678	676
	0.6	630	682.5	673.5
	0.601	630	680.5	673.5
	0.602	632.5	677	672.5
	0.603	630.5	679	676.5
	0.604	629.5	681	671.5
	0.605	628	681	673.5
	0.606	629	678	672.5
	0.607	626	679	676
	0.608	627	679	675
	0.609	625	683.5	672
	0.61	624.5	679	672.5
	0.611	623.5	684	674.5
	0.612	623	683.5	674
	0.613	619.5	678	672.5
	0.614	622	679	669
	0.615	619.5	679	670
	0.616	620	681	670.5
	0.617	620.5	683	670
	0.618	619	682	670
	0.619	618	682.5	672.5
	0.62	617.5	679	672.5
	0.621	617.5	679	669
	0.622	619.5	682	669
	0.623	620	676	671
	0.624	618	681	669
	0.625	617	679	669
	0.626	617	684	670
	0.627	621.5	679	673
	0.628	617.5	679	669
	0.629	617.5	679	669.5
	0.63	618	676.5	668.5
	0.631	617	679	668.5
	0.632	621.5	682	672
	0.633	622	683.5	668.5
	0.634	624	677.5	668.5
	0.635	622	681	670.5
	0.636	619	679	667
	0.637	626	682	669.5
	0.638	627.5	679	667.5
	0.639	624.5	681	669
	0.64	626.5	681	670
	0.641	626	679	667
	0.642	627.5	678	666.5
	0.643	631.5	680.5	672
	0.644	632.5	678.5	673.5
	0.645	630	681.5	667
	0.646	630.5	684.5	668.5
	0.647	637	677.5	666
	0.648	638	679	668
	0.649	637	679	667.5
	0.65	640	681	670.5
	0.651	640.5	677	670
	0.652	644	679	667.5
	0.653	645	678	668
	0.654	646	679	666.5
	0.655	647	679	672
	0.656	652	678.5	664
	0.657	653.5	677.5	668.5
	0.658	653.5	677.5	670.5
	0.659	658	677	670
	0.66	658	677	671.5
	0.661	658.5	674	668
	0.662	658.5	677	670.5
	0.663	657.5	675.5	668
	0.664	662.5	677	670
	0.665	664	676.5	669
	0.666	666	675	668.5
	0.667	670	677	669.5
	0.668	670	674.5	667
	0.669	669.5	677	672
	0.67	671	679	664
	0.671	676.5	675.5	668.5
	0.672	677.5	676	668.5
	0.673	684	676	670
	0.674	684.5	676	669
	0.675	689.5	674	668
	0.676	691	671.5	667.5
	0.677	693	673.5	669.5
	0.678	694	673.5	671
	0.679	693	672.5	670.5
	0.68	697.5	675.5	667
	0.681	702.5	677	673
	0.682	704.5	670	666
	0.683	706.5	672.5	671
	0.684	712.5	675	668
	0.685	713	672	668
	0.686	711.5	673	671
	0.687	719.5	671.5	667.5
	0.688	718.5	671.5	669
	0.689	720	672	670
	0.69	720	672	669.5
	0.691	718.5	670	669
	0.692	722	671.5	669
	0.693	723	670	669
	0.694	724	672	664
	0.695	726	670	667
	0.696	725	673.5	670
	0.697	726.5	673	667
	0.698	728	670	668
	0.699	726.5	669	672.5
	0.7	727	669.5	667.5
	0.701	728.5	673	671.5
	0.702	723.5	671	670
	0.703	722.5	670.5	667
	0.704	723	671	670
	0.705	724	668	665.5
	0.706	723.5	672.5	670
	0.707	723.5	670	670
	0.708	725.5	670	668.5
	0.709	725	669.5	669.5
	0.71	723	670	669.5
	0.711	721	671.5	670.5
	0.712	720.5	668.5	671
	0.713	720	670.5	671
	0.714	717.5	670	667
	0.715	718.5	669.5	670
	0.716	716.5	669.5	669.5
	0.717	718	668	670.5
	0.718	715.5	668	671.5
	0.719	714	666	670.5
	0.72	717.5	670.5	670
	0.721	711.5	671.5	668.5
	0.722	712.5	669	669
	0.723	708	666.5	670.5
	0.724	706.5	668	668.5
	0.725	709	667.5	670.5
	0.726	700.5	667.5	670.5
	0.727	700.5	668	673.5
	0.728	705.5	665	670
	0.729	700.5	666.5	673
	0.73	703.5	668.5	670
	0.731	701	670	671
	0.732	699	667.5	669.5
	0.733	701.5	669.5	675
	0.734	697.5	667.5	669.5
	0.735	694	666	671.5
	0.736	691.5	669	674.5
	0.737	694	666	671
	0.738	696	667.5	675.5
	0.739	694	667	672
	0.74	693.5	670	670
	0.741	690.5	664	671.5
	0.742	687.5	664	671.5
	0.743	688.5	668	669.5
	0.744	689.5	666.5	673
	0.745	686.5	667.5	669.5
	0.746	684.5	663.5	674
	0.747	684	669	672
	0.748	683.5	667.5	672
	0.749	684	668	671.5
	0.75	682.5	664	674.5
	0.751	682.5	666	673.5
	0.752	679	669	673.5
	0.753	683	665.5	675
	0.754	681.5	664	671.5
	0.755	677.5	666	676.5
	0.756	679	669	672.5
	0.757	678.5	669	673
	0.758	678.5	667.5	675.5
	0.759	677	668	673
	0.76	676.5	666	676
	0.761	675.5	667	672.5
	0.762	676.5	670	671.5
	0.763	677	668	672.5
	0.764	673.5	665	672.5
	0.765	672	667	672
	0.766	675	668.5	674
	0.767	675.5	670	671.5
	0.768	674	667	671.5
	0.769	671.5	666	674
	0.77	676	669	672.5
	0.771	674.5	666.5	673
	0.772	672	666.5	677
	0.773	670.5	667	673
	0.774	673	668	674.5
	0.775	667.5	664.5	672
	0.776	670	670	671
	0.777	671.5	666	672.5
	0.778	674.5	668	670
	0.779	673	667	671
	0.78	670	668	672.5
	0.781	670.5	667.5	671
	0.782	670.5	669	673
	0.783	669.5	670.5	671.5
	0.784	670	669.5	671
	0.785	665.5	670.5	671.5
	0.786	668	667	671
	0.787	668.5	670	671.5
	0.788	668	669	675.5
	0.789	667	673.5	671.5
	0.79	664	671.5	674.5
	0.791	665.5	670	669.5
	0.792	664	671.5	672
	0.793	665.5	671.5	670
	0.794	662	671	670.5
	0.795	664	672	674
	0.796	663.5	674.5	675.5
	0.797	664	673.5	672.5
	0.798	664	671	671
	0.799	663.5	675	670.5
	0.8	664	671.5	674
	0.801	660	669	672.5
	0.802	662	671.5	673
	0.803	663.5	670	672.5
	0.804	662	672.5	673.5
	0.805	660	672	671.5
	0.806	660	672.5	670.5
	0.807	662	675	669.5
	0.808	660	672.5	677
	0.809	661	672.5	674
	0.81	662	671	673.5
	0.811	659.5	673	670
	0.812	659.5	674	671.5
	0.813	656	673.5	674
	0.814	659.5	673.5	673.5
	0.815	659	675.5	673
	0.816	656.5	674	674.5
	0.817	659	673	675
	0.818	656.5	675.5	671
	0.819	656.5	674.5	669.5
	0.82	656	673	669
	0.821	655	674	672
	0.822	656.5	672.5	671
	0.823	657.5	674.5	666.5
	0.824	657.5	674	672
	0.825	654.5	676	672
	0.826	652.5	676.5	673.5
	0.827	656.5	675.5	669.5
	0.828	656	677	672
	0.829	654	674	670.5
	0.83	655.5	676.5	671
	0.831	653	675.5	669
	0.832	651.5	674	670.5
	0.833	656	677	670
	0.834	654	677.5	672
	0.835	649.5	675.5	667
	0.836	655.5	676.5	670
	0.837	652	679	668.5
	0.838	652.5	673.5	670.5
	0.839	652	679	668
	0.84	651.5	675.5	670
	0.841	651.5	671.5	670.5
	0.842	653.5	677	670
	0.843	654.5	676.5	671.5
	0.844	649.5	676	670.5
	0.845	656.5	675.5	668
	0.846	654	678	669
	0.847	655	679	672
	0.848	652.5	674	669.5
	0.849	654	674	670
	0.85	651.5	678.5	669.5
	0.851	655	675.5	672.5
	0.852	652	675.5	671
	0.853	653	675.5	668
	0.854	648.5	675.5	668.5
	0.855	657	678.5	668.5
	0.856	649.5	677	669
	0.857	656.5	675.5	668.5
	0.858	654.5	675	668.5
	0.859	655.5	677	667.5
	0.86	655	674	670
	0.861	658.5	678.5	668
	0.862	657	676.5	669.5
	0.863	657.5	676.5	668
	0.864	656.5	675	666.5
	0.865	659	676.5	667
	0.866	657	674.5	670.5
	0.867	658	679	668.5
	0.868	658	675.5	669
	0.869	658	675.5	668
	0.87	659	674	670
	0.871	658	675.5	670
	0.872	660.5	673.5	669.5
	0.873	661	675	670
	0.874	663.5	677.5	669
	0.875	662.5	676	671
	0.876	664	675	669
	0.877	663.5	677	663.5
	0.878	663.5	675.5	667.5
	0.879	664	675.5	667.5
	0.88	663.5	676	672
	0.881	667	677	666
	0.882	666	675.5	669.5
	0.883	666.5	677	668
	0.884	665.5	675	666
	0.885	669	678.5	670
	0.886	667	673.5	667.5
	0.887	671	676.5	669
	0.888	669.5	676	672.5
	0.889	670	672	667
	0.89	671	673	670
	0.891	670.5	673	670
	0.892	673	674.5	667.5
	0.893	672.5	677	670.5
	0.894	673.5	674	667
	0.895	675.5	677	671
	0.896	678	676	667
	0.897	675	672.5	663.5
	0.898	677	672.5	671
	0.899	675	676.5	669
	0.9	676.5	671	670
	0.901	676	673	667.5
	0.902	679	672.5	667.5
	0.903	678	675	670
	0.904	677	672.5	670.5
	0.905	678	673.5	671
	0.906	679	675	667
	0.907	677	673	671
	0.908	677.5	672.5	668.5
	0.909	679	669.5	674
	0.91	678.5	671.5	670
	0.911	677	675.5	673
	0.912	681.5	671	670.5
	0.913	678	671.5	670
	0.914	678	673.5	671.5
	0.915	681.5	670.5	670
	0.916	683	671.5	668
	0.917	683	670	671.5
	0.918	681	670	673
	0.919	679	670.5	672.5
	0.92	682	672	670
	0.921	679	671	670
	0.922	681.5	670	669
	0.923	683	670	670
	0.924	679	672.5	671.5
	0.925	678	669.5	668.5
	0.926	679	671.5	674
	0.927	679	670	673
	0.928	683	667	670
	0.929	681.5	670	672
	0.93	679	669.5	673
	0.931	682.5	672	673
	0.932	682.5	670	669.5
	0.933	679	671	672
	0.934	681	668	671.5
	0.935	683.5	670	671
	0.936	679	670.5	672
	0.937	683	673	673.5
	0.938	678.5	668.5	671
	0.939	679	669	674
	0.94	679	667	669.5
	0.941	684	670	672
	0.942	679	669	673.5
	0.943	682	672.5	674.5
	0.944	681.5	668	670.5
	0.945	678.5	670	671.5
	0.946	681	668	670
	0.947	679	668.5	671.5
	0.948	676.5	671	673
	0.949	681.5	668.5	667.5
	0.95	681	668	670
	0.951	683.5	670.5	670
	0.952	681.5	667.5	671.5
	0.953	681	666.5	672
	0.954	679	670	673
	0.955	677	669.5	670.5
	0.956	679	670	671
	0.957	679	670	673
	0.958	679	666.5	671.5
	0.959	679	669	673
	0.96	678	666	671.5
	0.961	676.5	670.5	670.5
	0.962	675.5	670	669.5
	0.963	678.5	670	669.5
	0.964	677	667.5	671.5
	0.965	678	669.5	671.5
	0.966	678	666.5	671
	0.967	677.5	670	669.5
	0.968	677	668	672.5
	0.969	678.5	667.5	671.5
	0.97	676.5	666	671.5
	0.971	674	669	674
	0.972	677	669.5	675.5
	0.973	675.5	668	673
	0.974	678	670.5	669.5
	0.975	677	669	671
	0.976	671	670	670
	0.977	677.5	668	673
	0.978	672.5	666.5	671.5
	0.979	675	669.5	676
	0.98	677	668.5	673.5
	0.981	672	666.5	674
	0.982	673	667.5	673
	0.983	674	666	673.5
	0.984	676.5	667.5	671
	0.985	673.5	668.5	671.5
	0.986	672.5	668.5	672.5
	0.987	673	665.5	672
	0.988	672	669	673
	0.989	670	668.5	672.5
	0.99	670	669.5	675
	0.991	671	670	669
	0.992	671.5	669	668.5
	0.993	667	666	674
	0.994	666	664	673.5
	0.995	671.5	669	671.5
	0.996	670.5	671.5	669.5
	0.997	669	669	671.5
	0.998	670	670	675.5
	0.999	668	671	674.5
	1	669.5	668.5	673
	1.001	669	673.5	672
	1.002	666	669.5	674
	1.003	667.5	667	672.5
	1.004	668	670	676.5
	1.005	667	669	675.5
	1.006	666	671.5	675
	1.007	667	669.5	676.5
	1.008	666.5	670.5	671
	1.009	663.5	670	671.5
	1.01	665	671.5	675.5
	1.011	668	670	674
	1.012	663	668.5	674.5
	1.013	667.5	669	676.5
	1.014	663.5	670	674
	1.015	668.5	670.5	674
	1.016	664	668.5	674
	1.017	666	670.5	674.5
	1.018	667	671	672.5
	1.019	665	672	671.5
	1.02	667	670.5	675
	1.021	666.5	671	676.5
	1.022	666.5	670	672
	1.023	671.5	669	672.5
	1.024	669	672	671.5
	1.025	670	671	669.5
	1.026	668.5	671.5	674.5
	1.027	668	667.5	673
	1.028	670.5	666	671
	1.029	667	668	671.5
	1.03	668	670	676
	1.031	667	670	670.5
	1.032	668	669	670
	1.033	670	668	672.5
	1.034	670	671	669
	1.035	671	671.5	671
	1.036	669.5	668	670
	1.037	670	672	671.5
	1.038	668	668.5	669
	1.039	670.5	671.5	671.5
	1.04	670	671.5	673.5
	1.041	671	670.5	674
	1.042	670.5	670.5	671
	1.043	674.5	671.5	670
	1.044	673.5	670	669
	1.045	673	671.5	672.5
	1.046	668.5	667.5	669
	1.047	670.5	670	668
	1.048	671	673	667.5
	1.049	670.5	670.5	671.5
	1.05	673.5	670.5	670
	1.051	670.5	673	669
	1.052	670	672.5	667
	1.053	670.5	670.5	670
	1.054	671.5	668.5	670.5
	1.055	673	671.5	668
	1.056	669.5	671	666.5
	1.057	668	671	668.5
	1.058	670	673.5	668.5
	1.059	671	672	667
	1.06	671.5	674.5	666
	1.061	673.5	670	670
	1.062	669.5	671.5	668.5
	1.063	674.5	674	669
	1.064	669	668.5	667.5
	1.065	671.5	673	666.5
	1.066	671	675.5	670
	1.067	670	674	666.5
	1.068	672.5	673.5	670
	1.069	673.5	671	667.5
	1.07	671	675	670.5
	1.071	671	673.5	667.5
	1.072	670	673	665
	1.073	671.5	672.5	669.5
	1.074	670	671	667.5
	1.075	670.5	673	671
	1.076	670	673	666.5
	1.077	671.5	671	669.5
	1.078	669.5	671.5	674
	1.079	671	674.5	669.5
	1.08	670	673	667.5
	1.081	671.5	671.5	669.5
	1.082	670.5	671.5	666
	1.083	674	674	667
	1.084	671.5	671	670.5
	1.085	672	671.5	669
	1.086	671.5	673.5	668.5
	1.087	671.5	670	669
	1.088	673	672.5	670.5
	1.089	673.5	674.5	670
	1.09	671.5	676	670
	1.091	672.5	672.5	668
	1.092	673.5	671.5	669
	1.093	671	673.5	669
	1.094	671.5	673	668.5
	1.095	672.5	670	670.5
	1.096	671.5	670.5	668
	1.097	675.5	672.5	670.5
	1.098	672	672	670
	1.099	671	673.5	670
	1.1	673	673	670.5
	1.101	674.5	673	670.5
	1.102	670.5	673	667.5
	1.103	670	674.5	672
	1.104	671.5	674	671
	1.105	675.5	671	671
	1.106	671.5	672	668.5
	1.107	672	671.5	670
	1.108	675	670.5	670.5
	1.109	673	672.5	669.5
	1.11	672.5	671.5	669
	1.111	675	674	669
	1.112	674.5	667.5	668
	1.113	670.5	668.5	673
	1.114	670	669.5	670.5
	1.115	671	670.5	669
	1.116	672	670	670.5
	1.117	672.5	666.5	671.5
	1.118	670.5	671	670
	1.119	672.5	671	672
	1.12	675	669	670
	1.121	669	673	669.5
	1.122	670.5	670.5	670
	1.123	670	669.5	671.5
	1.124	671	670	670
	1.125	670	668.5	670
	1.126	672	667.5	668.5
	1.127	671	670	668
	1.128	669	670	671.5
	1.129	672.5	670	669.5
	1.13	672	668.5	668
	1.131	667	669.5	670
	1.132	672.5	669.5	669.5
	1.133	670	670	672
	1.134	669	670.5	672.5
	1.135	671	670.5	671.5
	1.136	673.5	669	670.5
	1.137	673	669.5	668.5
	1.138	671	667	672.5
	1.139	671.5	669	671
	1.14	670	669.5	670.5
	1.141	670.5	665	669.5
	1.142	675	666.5	673
	1.143	673	668	670
	1.144	670.5	668.5	670.5
	1.145	671	664	670
	1.146	671.5	669	671.5
	1.147	672	667.5	669
	1.148	673.5	668	675
	1.149	670	665	675.5
	1.15	672.5	667	671.5
	1.151	676	667.5	675
	1.152	671	668	673.5
	1.153	671.5	666	675
	1.154	671.5	668.5	673
	1.155	675	667.5	673
	1.156	672	666.5	671.5
	1.157	673	668	672.5
	1.158	672	667	674.5
	1.159	673	666	674
	1.16	673	667.5	671
	1.161	674	665	670.5
	1.162	673.5	667.5	676
	1.163	671	665	671.5
	1.164	673	666.5	673
	1.165	670	668	673.5
	1.166	670.5	670	671.5
	1.167	670	666.5	673.5
	1.168	671	665.5	675.5
	1.169	673.5	666	672
	1.17	668	670.5	673.5
	1.171	671.5	667	674.5
	1.172	667.5	667	670
	1.173	672.5	665.5	673.5
	1.174	672.5	665.5	672
	1.175	669.5	666.5	675.5
	1.176	672.5	669	672.5
	1.177	668	667.5	674
	1.178	672.5	664	675.5
	1.179	670	665.5	673
	1.18	670	667.5	671
	1.181	669.5	663.5	674
	1.182	670.5	667	677
	1.183	671.5	666.5	672.5
	1.184	666	666	673
	1.185	667.5	667.5	675
	1.186	669	666	670.5
	1.187	668.5	670.5	674
	1.188	664	669.5	674
	1.189	668.5	670	673
	1.19	667.5	668	676.5
	1.191	665	664	670.5
	1.192	666	666.5	673.5
	1.193	667.5	667	671
	1.194	668	670	676
	1.195	666	666.5	675.5
	1.196	668.5	665.5	674.5
	1.197	666	670	671.5
	1.198	670	668.5	672
	1.199	667.5	670	673
	1.2	666.5	670	675.5
	1.201	667.5	671.5	676.5
	1.202	664	671	669
	1.203	667.5	665.5	671
	1.204	669	666.5	673.5
	1.205	666	666.5	672
	1.206	667.5	668	674.5
	1.207	664.5	668.5	672.5
	1.208	666	669	673
	1.209	666.5	668	674
	1.21	668	667.5	676
	1.211	663.5	670	670
	1.212	662.5	670	674
	1.213	668	667	670.5
	1.214	668	669.5	672
	1.215	666.5	665.5	675
	1.216	666.5	668	674
	1.217	667.5	668.5	672
	1.218	664	669.5	672
	1.219	665	666.5	673.5
	1.22	665	670	673.5
	1.221	662.5	675	675.5
	1.222	663.5	670	675.5
	1.223	667	671.5	670.5
	1.224	667	671.5	673
	1.225	663.5	673	673.5
	1.226	666	669	670
	1.227	667.5	670	675
	1.228	667.5	671	674
	1.229	663.5	670	674.5
	1.23	665	671.5	673.5
	1.231	665.5	671.5	675
	1.232	667.5	671.5	675.5
	1.233	665.5	673.5	674
	1.234	667.5	671	670
	1.235	664	669	671.5
	1.236	666	671.5	672.5
	1.237	664	672	668.5
	1.238	668.5	670	671
	1.239	663.5	673	672.5
	1.24	664	675	674.5
	1.241	666	674.5	676.5
	1.242	666	674	674.5
	1.243	665.5	671	673.5
	1.244	666	675	673
	1.245	665	673.5	671
	1.246	665	673	674
	1.247	666	673.5	669
	1.248	665.5	672.5	674.5
	1.249	664	674	673
	1.25	668	676.5	671.5
	1.251	666.5	675	674.5
	1.252	666.5	674.5	672
	1.253	667.5	674	676.5
	1.254	668	677	672.5
	1.255	665.5	674.5	672
	1.256	666.5	673	673
	1.257	664	677.5	670
	1.258	669	675	674.5
	1.259	668	676.5	670.5
	1.26	663.5	677	671.5
	1.261	667.5	675	672.5
	1.262	669	675	669.5
	1.263	670	676.5	671
	1.264	670.5	675.5	675
	1.265	668	674	671
	1.266	666	675.5	670.5
	1.267	665.5	677	672.5
	1.268	667	676.5	669.5
	1.269	669	673	670.5
	1.27	666	676.5	671.5
	1.271	670	674.5	671.5
	1.272	674.5	671.5	674.5
	1.273	670	674.5	674
	1.274	671	678	669
	1.275	667	678	670
	1.276	671.5	674.5	670
	1.277	668	677	669
	1.278	671	678	670
	1.279	670	676.5	672.5
	1.28	670.5	675	670.5
	1.281	669	676.5	671
	1.282	673.5	675.5	669
	1.283	674	673	670.5
	1.284	670.5	677	672.5
	1.285	674.5	675	672
	1.286	672.5	675	670.5
	1.287	668.5	673	670
	1.288	673.5	678	667.5
	1.289	673	677	668.5
	1.29	673.5	674	667.5
	1.291	674	674.5	667
	1.292	672	679	670.5
	1.293	674.5	673	671.5
	1.294	672	677	670.5
	1.295	674.5	677	672
	1.296	674.5	674	672
	1.297	675.5	673	671.5
	1.298	674	676	670.5
	1.299	673.5	676.5	671
	1.3	675.5	672.5	671.5
	1.301	676.5	677	669
	1.302	673.5	675.5	666.5
	1.303	675.5	674	670.5
	1.304	672.5	676.5	670.5
	1.305	674.5	672.5	665.5
	1.306	675	675.5	671.5
	1.307	673.5	675.5	670
	1.308	676.5	676.5	668
	1.309	675.5	676.5	670
	1.31	677	676.5	669.5
	1.311	676.5	676	667
	1.312	677.5	671.5	670.5
	1.313	673.5	674.5	673
	1.314	674	671.5	666.5
	1.315	670.5	673.5	670
	1.316	674.5	676	668
	1.317	674	675	666.5
	1.318	673.5	677	670.5
	1.319	670.5	673	667
	1.32	673	672	668
	1.321	673.5	677	669
	1.322	672.5	674	669.5
	1.323	677	673	667
	1.324	675	672.5	668
	1.325	671.5	674	670
	1.326	674	675.5	670.5
	1.327	676.5	677	668
	1.328	673.5	673	671
	1.329	675	674	671.5
	1.33	672	676.5	671
	1.331	670.5	671.5	671
	1.332	671.5	678.5	671.5
	1.333	672.5	674	669.5
	1.334	672	672.5	669.5
	1.335	676.5	671.5	670.5
	1.336	673.5	677	672
	1.337	672.5	675	671.5
	1.338	673.5	672	668.5
	1.339	671	672.5	670.5
	1.34	671.5	675	670
	1.341	674.5	673.5	672
	1.342	674	673	670
	1.343	675	673.5	669
	1.344	671.5	674	671.5
	1.345	675.5	673	674
	1.346	670	672	671.5
	1.347	673.5	673.5	674
	1.348	677.5	671	671.5
	1.349	675	673	673.5
	1.35	674	674	669
	1.351	674	672	669.5
	1.352	675.5	671	673
	1.353	673.5	671	673
	1.354	677	671.5	675
	1.355	674.5	671	672.5
	1.356	670.5	674	675.5
	1.357	674	671	672
	1.358	674	672	671.5
	1.359	669	673	671
	1.36	673	674	674.5
	1.361	673	673.5	671
	1.362	672.5	668	673
	1.363	671.5	670.5	671.5
	1.364	673.5	673.5	671.5
	1.365	673	673.5	674.5
	1.366	674.5	674.5	673.5
	1.367	672	672.5	669
	1.368	671	671	670.5
	1.369	674	670	673
	1.37	673.5	671	671.5
	1.371	670	671	672.5
	1.372	670	669	672
	1.373	675	672	670
	1.374	674	671	671.5
	1.375	675	669	670.5
	1.376	671.5	670	670
	1.377	674	670	672.5
	1.378	672	672.5	672.5
	1.379	673.5	668.5	674.5
	1.38	676.5	668.5	673.5
	1.381	673.5	668.5	672.5
	1.382	675	672	674
	1.383	675	670	673
	1.384	673.5	669.5	673
	1.385	672.5	669.5	671.5
	1.386	675.5	669.5	674.5
	1.387	676	672.5	673
	1.388	670.5	670	673
	1.389	672.5	666	671.5
	1.39	675.5	670.5	674.5
	1.391	674	670	677
	1.392	675.5	671	676
	1.393	674.5	673	674.5
	1.394	676	671.5	674.5
	1.395	674	670.5	674.5
	1.396	671.5	670.5	671
	1.397	676	670.5	676
	1.398	677	668.5	673
	1.399	676.5	671.5	676.5
	1.4	675	671.5	677.5
	1.401	678	667	672.5
	1.402	677	670	674.5
	1.403	677.5	672.5	677
	1.404	675.5	671.5	675
	1.405	676.5	668.5	676.5
	1.406	676.5	670.5	673
	1.407	674.5	671	677.5
	1.408	675	667.5	675.5
	1.409	675	671	678
	1.41	675	670	671.5
	1.411	672.5	669	675
	1.412	675.5	674	673.5
	1.413	676	672	673
	1.414	675	671	676.5
	1.415	672.5	671	676
	1.416	677	672	677.5
	1.417	676.5	673	674.5
	1.418	675	670.5	679
	1.419	674	671.5	677.5
	1.42	674	670.5	676.5
	1.421	671.5	670	676.5
	1.422	675	670	674.5
	1.423	674.5	672.5	676
	1.424	675.5	670.5	675.5
	1.425	672	669	671.5
	1.426	673.5	671.5	673.5
	1.427	672.5	671	675
	1.428	670	670	678.5
	1.429	671.5	670	677.5
	1.43	670	676.5	677.5
	1.431	673	671	677.5
	1.432	672.5	669.5	676
	1.433	671	671	675.5
	1.434	671.5	669.5	676
	1.435	673.5	670	674.5
	1.436	671	670	678
	1.437	671.5	671.5	676
	1.438	671	670.5	677
	1.439	672	670	673.5
	1.44	675	673.5	678
	1.441	671.5	669	674
	1.442	672.5	669	674
	1.443	671	672.5	675.5
	1.444	671.5	675.5	677.5
	1.445	676.5	672.5	677
	1.446	670.5	671	673.5
	1.447	675.5	670.5	677
	1.448	670.5	671.5	670.5
	1.449	673.5	672	675.5
	1.45	670	671.5	677
	1.451	671	673	674.5
	1.452	675	670	672.5
	1.453	671	671	672.5
	1.454	674	672.5	675.5
	1.455	673	670	672.5
	1.456	672.5	673	674.5
	1.457	677	673.5	673.5
	1.458	672.5	671	673.5
	1.459	673	670	675
	1.46	670.5	673.5	671
	1.461	673	675.5	668
	1.462	674.5	672.5	673.5
	1.463	673	672.5	674.5
	1.464	674	672.5	675
	1.465	672	674	672.5
	1.466	672	674	672
	1.467	672	672.5	671.5
	1.468	672	672	670
	1.469	671.5	673	671
	1.47	675.5	671.5	670
	1.471	673.5	674	672
	1.472	674	675	670
	1.473	672	671.5	668.5
	1.474	671.5	672.5	669.5
	1.475	674.5	673.5	671.5
	1.476	675	671.5	670.5
	1.477	675	672.5	669
	1.478	673	673.5	671.5
	1.479	673.5	677	667.5
	1.48	673	673	671.5
	1.481	675	673.5	668
	1.482	677	672.5	669.5
	1.483	671.5	675.5	671.5
	1.484	670	677.5	672
	1.485	675	672.5	673
	1.486	674	674	671.5
	1.487	676.5	674	670
	1.488	675.5	677	669
	1.489	673.5	674	670.5
	1.49	677	675.5	671
	1.491	675.5	676	672
	1.492	671	676	672.5
	1.493	674.5	675	672.5
	1.494	672	675.5	670.5
	1.495	674	672	669.5
	1.496	673	674.5	670.5
	1.497	677	676.5	670.5
	1.498	672.5	677	669.5
	1.499	671	674	673
	1.5	671.5	675	670.5
	1.501	674.5	674	674.5
	1.502	674.5	679	670
	1.503	675.5	677	671
	1.504	676	674.5	669.5
	1.505	672	674.5	668.5
	1.506	673.5	676	673.5
	1.507	673.5	676.5	674.5
	1.508	676.5	679	671
	1.509	675	675.5	673
	1.51	672.5	676	669.5
	1.511	672	676.5	669.5
	1.512	675	678.5	672
	1.513	677.5	675	671.5
	1.514	677	675.5	671
	1.515	675	672.5	672.5
	1.516	677	678.5	669
	1.517	676.5	675.5	670.5
	1.518	675.5	674.5	670
	1.519	677	672.5	669
	1.52	674.5	671.5	671.5
	1.521	676	675.5	672.5
	1.522	672.5	675.5	672.5
	1.523	676	674.5	673.5
	1.524	677.5	670.5	671
	1.525	676.5	672.5	668
	1.526	674	668.5	673
	1.527	675	672.5	674
	1.528	675.5	675	671.5
	1.529	673.5	676.5	671
	1.53	677	672.5	670
	1.531	676	673	672.5
	1.532	679	668	672.5
	1.533	678.5	670.5	671
	1.534	673	669	670
	1.535	676.5	669	670.5
	1.536	677	670	671.5
	1.537	677.5	670	670.5
	1.538	679	670	672.5
	1.539	677	671.5	671.5
	1.54	677	667	668.5
	1.541	677	670.5	670.5
	1.542	675.5	667	669
	1.543	677	667	673
	1.544	678	668	673.5
	1.545	679	667	675
	1.546	681.5	665	675
	1.547	679	668.5	674.5
	1.548	679	665.5	671.5
	1.549	679	668	670
	1.55	678	667.5	672.5
	1.551	682	667.5	674
	1.552	678	664	669.5
	1.553	681.5	669	670
	1.554	677	668.5	671
	1.555	679	668.5	672.5
	1.556	683.5	669	673
	1.557	682	670	673
	1.558	679	664	671.5
	1.559	681.5	666.5	673.5
	1.56	684	670.5	675
	1.561	678	664	675.5
	1.562	681.5	668	672.5
	1.563	684	665.5	675
	1.564	679	663.5	674
	1.565	685	666	677
	1.566	683.5	667	674.5
	1.567	685	667.5	672
	1.568	683.5	666.5	674
	1.569	682.5	668	677
	1.57	684	666.5	675.5
	1.571	681	667.5	675
	1.572	681.5	669	677
	1.573	683	669	676
	1.574	683	668	674
	1.575	688.5	667.5	672.5
	1.576	685	669.5	675
	1.577	683.5	668	675.5
	1.578	690	667	677
	1.579	684.5	666	674
	1.58	685.5	670	675
	1.581	682	670	675.5
	1.582	681.5	668	677
	1.583	682	665.5	678.5
	1.584	688.5	668.5	677
	1.585	685.5	668	679
	1.586	682	670	678
	1.587	684	670	677
	1.588	684	671	676.5
	1.589	681	665	676
	1.59	679	669.5	676
	1.591	684	669.5	675.5
	1.592	682	669.5	677
	1.593	683	671.5	678
	1.594	679	669.5	677.5
	1.595	684	673.5	679
	1.596	682.5	675	683.5
	1.597	685.5	670	678
	1.598	682.5	672.5	681.5
	1.599	684	672.5	679
	1.6	679	671.5	677
	1.601	686	671.5	678
	1.602	682	675	679
	1.603	683	672	675.5
	1.604	684.5	674.5	676
	1.605	682.5	671	679
	1.606	681.5	675	681
	1.607	681.5	671.5	679
	1.608	679	673.5	679
	1.609	679	677	677
	1.61	679	673	681
	1.611	682.5	674.5	676.5
	1.612	684.5	673	678.5
	1.613	679	672.5	679
	1.614	681	672.5	677
	1.615	681	676	679
	1.616	678.5	672	673.5
	1.617	677.5	671.5	679
	1.618	679	676.5	677.5
	1.619	682.5	675.5	677
	1.62	679	675	677.5
	1.621	681	675.5	678
	1.622	681	676.5	677.5
	1.623	682	671.5	677
	1.624	684	673.5	679
	1.625	681.5	672	675.5
	1.626	679	671.5	678.5
	1.627	684	674.5	672
	1.628	683.5	674	677
	1.629	683.5	672.5	676
	1.63	682	673.5	674.5
	1.631	683	673.5	677
	1.632	683	675.5	674
	1.633	679	675	677
	1.634	683.5	675.5	674.5
	1.635	679	676	673.5
	1.636	684	673	674.5
	1.637	683.5	672.5	675
	1.638	683	674	676
	1.639	683.5	672.5	674.5
	1.64	679	673.5	675.5
	1.641	684.5	675.5	675
	1.642	683	677	673
	1.643	682	673.5	673.5
	1.644	679	675.5	674.5
	1.645	681.5	675.5	673
	1.646	684	676	677.5
	1.647	681.5	675	670.5
	1.648	685	678.5	674
	1.649	679	672.5	670.5
	1.65	685	671.5	673
	1.651	686.5	678.5	672
	1.652	684	675.5	674
	1.653	684	677	668.5
	1.654	684	677	670
	1.655	685.5	676.5	672.5
	1.656	682	678.5	675
	1.657	684.5	675.5	671
	1.658	686.5	677	675
	1.659	683	675	673
	1.66	685	673	669
	1.661	678.5	677	672
	1.662	685	678	674
	1.663	685	677.5	674.5
	1.664	686.5	674.5	670
	1.665	683.5	677.5	670
	1.666	682.5	674	670.5
	1.667	684	678.5	671.5
	1.668	686	676.5	672.5
	1.669	679	678	670.5
	1.67	685.5	679	668.5
	1.671	685	677.5	669.5
	1.672	685	678.5	671.5
	1.673	684.5	677.5	666.5
	1.674	687	678.5	670.5
	1.675	684.5	679	673
	1.676	684.5	677.5	670
	1.677	685.5	679	673
	1.678	684.5	679	670.5
	1.679	685.5	674	671
	1.68	690.5	678	671
	1.681	686.5	678	671
	1.682	688.5	679	672
	1.683	687.5	678	671.5
	1.684	690	682	669.5
	1.685	687	679	673.5
	1.686	687	679	671.5
	1.687	687.5	679	674.5
	1.688	686	677	672
	1.689	686	679	673.5
	1.69	690	679	675
	1.691	686	678.5	675
	1.692	686	679	677
	1.693	685.5	679	674.5
	1.694	686	681	671.5
	1.695	685.5	677	678.5
	1.696	684.5	682	674
	1.697	687	677	674.5
	1.698	688	679	677
	1.699	684	682	676
	1.7	687	681	672
	1.701	684.5	684	676.5
	1.702	684.5	681	675.5
	1.703	686.5	682.5	675
	1.704	682.5	681.5	676
	1.705	686	681	673.5
	1.706	689	682.5	673.5
	1.707	684	679	674
	1.708	684	682	676
	1.709	684	684.5	670.5
	1.71	685.5	684	677
	1.711	686	683.5	676
	1.712	686	683.5	676.5
	1.713	681.5	681	676.5
	1.714	686.5	683	674
	1.715	686	681.5	673.5
	1.716	683.5	684.5	672.5
	1.717	688	682	673.5
	1.718	681.5	679	672.5
	1.719	684	679	673.5
	1.72	684.5	687.5	672
	1.721	685	679	673
	1.722	683	683	672
	1.723	683	683.5	676
	1.724	681.5	682.5	671.5
	1.725	679	681	670.5
	1.726	684	684	673
	1.727	685.5	682	672
	1.728	684	683.5	673.5
	1.729	679	681.5	671
	1.73	684	683.5	672
	1.731	684	684.5	672
	1.732	684.5	679	670.5
	1.733	687.5	682.5	669.5
	1.734	682	683	668.5
	1.735	682.5	679	672.5
	1.736	682.5	685.5	675
	1.737	683	684	672.5
	1.738	682.5	682.5	671.5
	1.739	684.5	685	669.5
	1.74	682	684	670.5
	1.741	684	685	670
	1.742	684	684	670
	1.743	684	684	671
	1.744	683.5	686	670
	1.745	679	684	667
	1.746	683	683.5	672.5
	1.747	679	681.5	668
	1.748	679	684	670.5
	1.749	682	684	670.5
	1.75	679	683	669
	1.751	684	684	670.5
	1.752	676.5	686	671.5
	1.753	681	686	669
	1.754	679	684.5	670
	1.755	681.5	687	666.5
	1.756	678	686.5	672.5
	1.757	677	684.5	671.5
	1.758	678	682.5	670.5
	1.759	679	688.5	668
	1.76	677	685	671
	1.761	679	686.5	670
	1.762	677	687	669.5
	1.763	677	688	673.5
	1.764	672.5	684	669.5
	1.765	674.5	687.5	669.5
	1.766	675.5	689.5	670.5
	1.767	673	687	668
	1.768	675.5	687.5	670.5
	1.769	673.5	684.5	671.5
	1.77	674.5	684.5	668
	1.771	670	686	670.5
	1.772	670	686	671
	1.773	673	688.5	669.5
	1.774	672	686	676.5
	1.775	666	692	671.5
	1.776	668.5	686.5	673.5
	1.777	668	688	675.5
	1.778	666	687	675.5
	1.779	665.5	688.5	672.5
	1.78	665	686	673
	1.781	663.5	686	674.5
	1.782	665.5	690	674.5
	1.783	665	689.5	675
	1.784	662	687.5	675.5
	1.785	664	687.5	676
	1.786	662.5	688.5	674
	1.787	660.5	686	676.5
	1.788	663	690.5	674
	1.789	661.5	684.5	678
	1.79	661	685.5	676
	1.791	660.5	687.5	679
	1.792	658.5	684.5	677.5
	1.793	656.5	688.5	674.5
	1.794	655	691	677.5
	1.795	654.5	687.5	674
	1.796	655	685.5	673
	1.797	654.5	685	679
	1.798	649.5	686.5	677
	1.799	655	686.5	676.5
	1.8	653.5	687	678.5
	1.801	649.5	690.5	678.5
	1.802	651	689	678
	1.803	649.5	689.5	676.5
	1.804	649.5	688.5	678.5
	1.805	649.5	688.5	679
	1.806	644.5	687.5	677
	1.807	648.5	689	679
	1.808	645.5	685.5	677
	1.809	647.5	687	679
	1.81	643	684.5	677.5
	1.811	643	688.5	684
	1.812	641	690	680.5
	1.813	642	687	678
	1.814	638.5	687.5	679
	1.815	642	686.5	679
	1.816	642	685.5	682
	1.817	639	685.5	682
	1.818	638.5	687	678
	1.819	636	687.5	679
	1.82	636	687.5	683.5
	1.821	634.5	685	682
	1.822	633.5	687.5	681.5
	1.823	633	686.5	679
	1.824	632	685	684
	1.825	631.5	684.5	681.5
	1.826	628.5	684	679
	1.827	628.5	684.5	682
	1.828	629.5	686.5	679
	1.829	628	686	683
	1.83	626	684.5	682
	1.831	626	682	684
	1.832	626	684.5	681
	1.833	625	686	684
	1.834	622.5	683	685.5
	1.835	620.5	686.5	682
	1.836	619.5	685.5	684
	1.837	616	682.5	681.5
	1.838	616.5	683	683
	1.839	614.5	681	681.5
	1.84	616.5	682.5	683
	1.841	616.5	682	681
	1.842	614.5	679	685.5
	1.843	608.5	678	682.5
	1.844	609	681	684
	1.845	606.5	678	682.5
	1.846	604	677	682.5
	1.847	604.5	679	684
	1.848	604.5	678.5	680.5
	1.849	600.5	677.5	685.5
	1.85	601.5	677	685.5
	1.851	600	677.5	683
	1.852	593	679	684
	1.853	597.5	677	679
	1.854	596.5	678.5	683.5
	1.855	592	678.5	679
	1.856	593.5	676.5	684.5
	1.857	593	675	682.5
	1.858	592.5	673.5	682.5
	1.859	589.5	674	682.5
	1.86	588	674	684
	1.861	587	674	682.5
	1.862	585	671.5	678
	1.863	586.5	673	684
	1.864	582.5	674	683.5
	1.865	585.5	673	682.5
	1.866	582.5	671	683
	1.867	579	672.5	682
	1.868	581	673.5	684.5
	1.869	581.5	673.5	685.5
	1.87	579	670.5	684.5
	1.871	576.5	665.5	686
	1.872	573	674	684.5
	1.873	573	670.5	683.5
	1.874	570.5	670	683.5
	1.875	571	668	684
	1.876	570	668	684.5
	1.877	565	666	684
	1.878	561.5	666	683
	1.879	564	666	684.5
	1.88	562	665.5	686.5
	1.881	559	666.5	681
	1.882	558.5	668.5	685.5
	1.883	558	663.5	684
	1.884	554	662.5	683.5
	1.885	551.5	664	684
	1.886	550	661.5	681.5
	1.887	549.5	662.5	685.5
	1.888	549.5	663	684
	1.889	542	660.5	679
	1.89	541.5	664	684
	1.891	538	663	684.5
	1.892	538	663.5	685
	1.893	535.5	665.5	679
	1.894	535	664	686
	1.895	534.5	664	681.5
	1.896	529	662.5	684
	1.897	529	665.5	683.5
	1.898	526.5	663.5	684
	1.899	527.5	664	684.5
	1.9	522.5	663	687
	1.901	519.5	663.5	685
	1.902	518	665.5	684.5
	1.903	512	662.5	683
	1.904	509.5	666.5	681.5
	1.905	506	662.5	684
	1.906	505.5	665	686.5
	1.907	500	662.5	679
	1.908	498.5	664	685.5
	1.909	495	668	686
	1.91	492	665.5	684
	1.911	487	666.5	683
	1.912	484.5	670	684.5
	1.913	477.5	668.5	684
	1.914	475.5	670	686.5
	1.915	470.5	668.5	685.5
	1.916	466	667.5	684
	1.917	464.5	670	686
	1.918	456	667.5	687
	1.919	455.5	671	687
	1.92	447	676	684
	1.921	444.5	672.5	683.5
	1.922	439.5	672.5	688.5
	1.923	438.5	671	688
	1.924	431.5	672.5	687.5
	1.925	426.5	673	687.5
	1.926	425	673	684.5
	1.927	419	671.5	685
	1.928	412.5	671.5	686
	1.929	407.5	675.5	687.5
	1.93	403	672.5	684
	1.931	396	673	685.5
	1.932	396.5	673	684
	1.933	393	671.5	686.5
	1.934	385	671.5	683
	1.935	387.5	675.5	683.5
	1.936	380	672	684
	1.937	376	675.5	684
	1.938	372.5	672.5	687.5
	1.939	365.5	673	685
	1.94	362.5	671.5	686
	1.941	358	673	688
	1.942	351	670.5	682.5
	1.943	345.5	671	681.5
	1.944	341	671	686
	1.945	330.5	669	686.5
	1.946	333	671	683
	1.947	328.5	667.5	685
	1.948	323	665	682
	1.949	321	668.5	684
	1.95	316	667.5	685
	1.951	314	667	686
	1.952	306.5	664	685
	1.953	301	666.5	686.5
	1.954	299.5	662	684
	1.955	298	665.5	683.5
	1.956	293	663	682.5
	1.957	290	664	687
	1.958	285	667.5	683
	1.959	279.5	660	684
	1.96	279	663	687
	1.961	276	660	684.5
	1.962	272.5	659	683
	1.963	267.5	657	683
	1.964	269.5	662	681.5
	1.965	260	659	684
	1.966	257.5	660	684
	1.967	256.5	656.5	681
	1.968	256	658.5	684.5
	1.969	248.5	656.5	681
	1.97	249	655	682
	1.971	246	659	682
	1.972	246	658.5	684.5
	1.973	244	656.5	681
	1.974	240.5	656	684
	1.975	237.5	649.5	683
	1.976	236	652	681.5
	1.977	231	647.5	681.5
	1.978	236	649.5	682.5
	1.979	231	651	682
	1.98	235.5	649	678.5
	1.981	228.5	649.5	679
	1.982	231	649.5	678.5
	1.983	229	645.5	679
	1.984	228.5	646.5	682
	1.985	225.5	646	683
	1.986	228.5	643.5	679
	1.987	228	646.5	679
	1.988	228	646	680.5
	1.989	228	642	677
	1.99	231.5	643	679
	1.991	232.5	644.5	678
	1.992	233.5	643.5	677
	1.993	233.5	644	676
[truncated: 13,006 more rows]

## Sheet: H
DataTypeVer2.0	Time	Fz	Fz	Fz
NumberOfData		8000	8000	8000
PreTriggerData		0	0	0
SamplingTime[ms]		1	1	1
DataLabel		V1:CMJ	V2:CMJ	V3:CMJ
DataUnit	sec	N	N	N
	0	615.5	620	626
	0.001	615.5	622	627
	0.002	617.5	619	622.5
	0.003	614	621.5	625.5
	0.004	613	620.5	624
	0.005	615.5	621	627
	0.006	615.5	621	623.5
	0.007	614.5	622	628.5
	0.008	613.5	619	625
	0.009	612.5	620	629
	0.01	617	623	626.5
	0.011	615	621	630
	0.012	614	621.5	625.5
	0.013	611.5	620	628
	0.014	615.5	622.5	626
	0.015	615.5	622	623.5
	0.016	615.5	623.5	626.5
	0.017	614.5	620.5	626
	0.018	614.5	619.5	628
	0.019	616	622	628.5
	0.02	616.5	626	628.5
	0.021	616.5	625.5	631.5
	0.022	615	622.5	628.5
	0.023	619	623	625
	0.024	617	620.5	629
	0.025	616	622	627.5
	0.026	615.5	625.5	626.5
	0.027	616	622.5	629.5
	0.028	616.5	626.5	626
	0.029	615	620	625.5
	0.03	615.5	625.5	627.5
	0.031	616	623.5	626.5
	0.032	615.5	626	631.5
	0.033	613.5	625	626.5
	0.034	617	622.5	629.5
	0.035	615.5	624	626
	0.036	614.5	621.5	627.5
	0.037	617	625.5	628.5
	0.038	613.5	623.5	628.5
	0.039	615.5	624.5	626.5
	0.04	614.5	625	623.5
	0.041	617	622	625.5
	0.042	617.5	623.5	627.5
	0.043	617	624.5	627
	0.044	619	622.5	622
	0.045	616	622	624.5
	0.046	616	618.5	627
	0.047	618.5	623.5	627
	0.048	616	623.5	624
	0.049	621.5	621.5	629
	0.05	618	621.5	624
	0.051	616	620.5	624
	0.052	616	619	624
	0.053	618.5	619	625.5
	0.054	615.5	622	624.5
	0.055	619	621	624.5
	0.056	619	623.5	623
	0.057	620	618	622
	0.058	620.5	622	626
	0.059	619	621.5	625.5
	0.06	623	621	622
	0.061	617	622	623.5
	0.062	616.5	623	625.5
	0.063	617.5	622	626
	0.064	617	617.5	624
	0.065	616	619	625.5
	0.066	620.5	619.5	623.5
	0.067	616	620.5	623
	0.068	620	620	622.5
	0.069	618.5	618	626.5
	0.07	619	620.5	623
	0.071	615.5	618	621.5
	0.072	619.5	620	625.5
	0.073	617	619	626
	0.074	620	620	624.5
	0.075	624	621	625.5
	0.076	617.5	619.5	626.5
	0.077	618.5	621.5	622
	0.078	620.5	617	621
	0.079	621.5	619	625.5
	0.08	619	617.5	621.5
	0.081	621.5	621	615.5
	0.082	620.5	621	623
	0.083	618	616	623
	0.084	617	616.5	620.5
	0.085	622	620.5	624.5
	0.086	621.5	619.5	623.5
	0.087	622.5	620	620.5
	0.088	620	619	622
	0.089	620.5	618.5	621.5
	0.09	622.5	621	621
	0.091	619	618.5	621.5
	0.092	620	620	622
	0.093	621	619	623.5
	0.094	622.5	620	622.5
	0.095	619	618	622
	0.096	624	619	622.5
	0.097	622	618	622.5
	0.098	622	619	620.5
	0.099	623	619.5	626
	0.1	626.5	619.5	624.5
	0.101	623.5	615	622
	0.102	623.5	617.5	626
	0.103	625	617	624.5
	0.104	622	619	622
	0.105	622	618.5	623
	0.106	623	620.5	622.5
	0.107	624	617	623.5
	0.108	629	617	623.5
	0.109	624.5	617.5	624
	0.11	623.5	615	622.5
	0.111	624.5	618.5	622
	0.112	625.5	617	621.5
	0.113	626	619	623.5
	0.114	622	621	622
	0.115	624.5	618.5	626.5
	0.116	624.5	616.5	619.5
	0.117	626	618.5	624
	0.118	625.5	615	622
	0.119	623.5	619	620.5
	0.12	624	617	619.5
	0.121	624.5	619	626.5
	0.122	622	617	620
	0.123	623	618.5	624
	0.124	624.5	616.5	622.5
	0.125	627	615	622
	0.126	627.5	616.5	622.5
	0.127	625.5	617	621.5
	0.128	624	620	621
	0.129	622.5	618	624.5
	0.13	626	619	621
	0.131	625.5	615	618
	0.132	629	617	622.5
	0.133	622.5	617	620.5
	0.134	625.5	615.5	621
	0.135	625	616	623
	0.136	627.5	619.5	622
	0.137	622.5	618.5	622.5
	0.138	622	616	622
	0.139	624.5	615	620.5
	0.14	628.5	615	621
	0.141	625	615.5	618
	0.142	622.5	614.5	620
	0.143	627.5	616	617
	0.144	622	616.5	622
	0.145	626.5	615.5	622
	0.146	626	619	620
	0.147	628.5	614	619
	0.148	624.5	614.5	618
	0.149	627	611.5	620
	0.15	622.5	613	619.5
	0.151	628	613.5	622
	0.152	623.5	611.5	620
	0.153	624.5	614.5	619
	0.154	627.5	614	619.5
	0.155	625.5	613	619
	0.156	623.5	614	619
	0.157	626	611.5	616
	0.158	622.5	613.5	619.5
	0.159	624	615.5	617.5
	0.16	622	615	619
	0.161	625	612.5	618.5
	0.162	624.5	611.5	621
	0.163	623.5	611.5	620
	0.164	622	610.5	618.5
	0.165	623.5	611.5	617
	0.166	624	609	622
	0.167	625	614.5	619.5
	0.168	623.5	611.5	616
	0.169	623.5	611	619
	0.17	624.5	615	617.5
	0.171	625	611	619
	0.172	625	611.5	621
	0.173	622	611.5	617
	0.174	624.5	611	622
	0.175	622.5	611	613.5
	0.176	622	610.5	619
	0.177	625	611	617
	0.178	622	609	622
	0.179	624	610.5	620
	0.18	620	610	622
	0.181	622	609.5	618.5
	0.182	623.5	612.5	616.5
	0.183	621	611	617
	0.184	625.5	611	619
	0.185	621.5	611.5	619.5
	0.186	622.5	613.5	619
	0.187	620	613	621.5
	0.188	619.5	612	618.5
	0.189	619	615.5	616
	0.19	621	613.5	621.5
	0.191	622.5	610.5	620
	0.192	623	613.5	619.5
	0.193	623	608.5	619.5
	0.194	621.5	615	620.5
	0.195	619.5	612	618
	0.196	617	614.5	619.5
	0.197	621.5	615.5	620
	0.198	622.5	617	621.5
	0.199	619.5	612	623
	0.2	620.5	614.5	619.5
	0.201	622.5	613	624
	0.202	618	616	620.5
	0.203	620	617.5	615.5
	0.204	619.5	616	620.5
	0.205	617.5	619	622
	0.206	622	618	621
	0.207	618.5	618	621.5
	0.208	620.5	617	621
	0.209	620	615.5	623.5
	0.21	619.5	618.5	623.5
	0.211	616.5	618	622
	0.212	621.5	621	626
	0.213	617.5	621.5	623
	0.214	616.5	619	626.5
	0.215	621	619	623.5
	0.216	617	621.5	626
	0.217	615.5	621	626.5
	0.218	619.5	623	623
	0.219	619	622.5	624
	0.22	618	620.5	624.5
	0.221	618	622.5	629
	0.222	615.5	623.5	626
	0.223	617.5	626.5	627.5
	0.224	618.5	623.5	628.5
	0.225	617	623	624.5
	0.226	617	620.5	624
	0.227	619	624.5	624.5
	0.228	617	626.5	625
	0.229	618	622.5	624.5
	0.23	618.5	626.5	626.5
	0.231	615	624	622.5
	0.232	616.5	624	625
	0.233	617	625	628
	0.234	619	622.5	627.5
	0.235	617	625.5	628.5
	0.236	618.5	624.5	629
	0.237	616.5	626	626.5
	0.238	616.5	625.5	624.5
	0.239	616.5	623.5	626
	0.24	617	626.5	628.5
	0.241	616	623.5	628.5
	0.242	615	626	626.5
	0.243	619.5	624.5	629
	0.244	615.5	628.5	629
	0.245	618	625.5	625
	0.246	617.5	624.5	626.5
	0.247	618.5	628	632
	0.248	620	626	629.5
	0.249	618	622	629.5
	0.25	615	625.5	625.5
	0.251	618	628	625.5
	0.252	616.5	625.5	626
	0.253	618.5	624.5	624.5
	0.254	619	625.5	624.5
	0.255	618	625.5	628.5
	0.256	622	630.5	626.5
	0.257	616.5	625.5	623.5
	0.258	619	628	630.5
	0.259	618	624	625
	0.26	617	628	625.5
	0.261	617	626	628
	0.262	615.5	628.5	625.5
	0.263	617	626	625.5
	0.264	617	626	625.5
	0.265	614.5	625.5	626.5
	0.266	617	627.5	623.5
	0.267	619.5	625.5	625.5
	0.268	620	626.5	625.5
	0.269	617	622.5	628.5
	0.27	615.5	625	625.5
	0.271	616.5	622	624.5
	0.272	615.5	625	627.5
	0.273	619	623.5	624.5
	0.274	622	625.5	624.5
	0.275	617	625	627.5
	0.276	617	623.5	624
	0.277	618.5	626	626.5
	0.278	618.5	625	627.5
	0.279	618.5	625	626
	0.28	617.5	624.5	626.5
	0.281	619	623	626
	0.282	619.5	626.5	627
	0.283	617	627	626.5
	0.284	619	626	623
	0.285	620	623.5	621
	0.286	618	624	623
	0.287	619.5	627.5	626.5
	0.288	618.5	623	621
	0.289	620	620	627
	0.29	622	623	625.5
	0.291	619.5	622.5	623
	0.292	620	623	624
	0.293	621	625	621
	0.294	620.5	623	623.5
	0.295	621	623	619
	0.296	624	622.5	619
	0.297	619	625.5	622.5
	0.298	621	621	617
	0.299	620	623.5	620
	0.3	620.5	623	622
	0.301	624.5	622.5	619.5
	0.302	622.5	622	618
	0.303	624	620.5	618.5
	0.304	620.5	619.5	619.5
	0.305	627.5	621.5	618.5
	0.306	624	619.5	616.5
	0.307	626.5	619	619.5
	0.308	623.5	621	619
	0.309	621.5	621	619
	0.31	624.5	622	619
	0.311	623.5	618.5	620.5
	0.312	626.5	625.5	618.5
	0.313	624.5	619.5	614.5
	0.314	628	621	616.5
	0.315	626	622.5	622
	0.316	625.5	617	615.5
	0.317	622	621	617
	0.318	625.5	622.5	619.5
	0.319	621	625.5	618.5
	0.32	623.5	622	619.5
	0.321	627.5	621.5	617
	0.322	629	616	618
	0.323	624.5	619.5	620.5
	0.324	626.5	618.5	620
	0.325	624.5	620	618.5
	0.326	624	619	617
	0.327	626	622	620
	0.328	626.5	617	620.5
	0.329	625.5	619.5	616.5
	0.33	627.5	621	618
	0.331	624.5	616.5	616
	0.332	624.5	618	617
	0.333	624	618.5	621.5
	0.334	624	622.5	621
	0.335	628	620	619.5
	0.336	627	616	620
	0.337	625.5	618.5	620
	0.338	623.5	620.5	619
	0.339	623.5	622	619
	0.34	624.5	621	617
	0.341	623	618	622
	0.342	624	623	622
	0.343	620.5	620.5	621.5
	0.344	624.5	619.5	622
	0.345	622.5	621.5	621.5
	0.346	622.5	619.5	622.5
	0.347	623	620	623
	0.348	625.5	618.5	622.5
	0.349	621.5	619	619
	0.35	622	618.5	623.5
	0.351	622	616	620.5
	0.352	621.5	619	621.5
	0.353	622	620	619
	0.354	621	621	624
	0.355	620	616.5	622
	0.356	622.5	619.5	624
	0.357	622.5	621.5	620
	0.358	622	618	625.5
	0.359	620.5	620.5	625
	0.36	617	623	623.5
	0.361	623.5	617	624
	0.362	619.5	624.5	627
	0.363	622	618	622.5
	0.364	615.5	616	624
	0.365	623	620	623.5
	0.366	618.5	621	623.5
	0.367	618.5	621	625
	0.368	620	620.5	623
	0.369	616.5	618	622.5
	0.37	621	619	625.5
	0.371	619.5	620.5	625.5
	0.372	620	619.5	624
	0.373	618.5	620.5	623
	0.374	619.5	622	624.5
	0.375	617	621	625.5
	0.376	616.5	620	624.5
	0.377	618	620.5	620.5
	0.378	618	621	622.5
	0.379	615	621	624.5
	0.38	617.5	616	622.5
	0.381	616.5	622	626
	0.382	617.5	620	622
	0.383	618.5	617.5	625
	0.384	617	623	623
	0.385	615	619.5	625
	0.386	620.5	621	624.5
	0.387	618	617	622
	0.388	615	621	621.5
	0.389	615.5	622	622
	0.39	617.5	618	622.5
	0.391	615.5	622	623.5
	0.392	619	622.5	624.5
	0.393	616.5	621	622
	0.394	616.5	620.5	620.5
	0.395	620	621.5	624
	0.396	615	622	622
	0.397	618	622.5	628
	0.398	619	615.5	623
	0.399	616.5	626	622
	0.4	613.5	623.5	625.5
	0.401	615.5	623.5	622
	0.402	615	623	621.5
	0.403	615.5	624.5	620
	0.404	615.5	624.5	622
	0.405	614.5	623	619.5
	0.406	615.5	622.5	621.5
	0.407	620	622	621
	0.408	616	624.5	622.5
	0.409	615.5	622	624
	0.41	615.5	625	619.5
	0.411	616	623.5	623
	0.412	616	621.5	621
	0.413	617	626	616.5
	0.414	614	622	616
	0.415	617.5	624	621.5
	0.416	612.5	626.5	619
	0.417	617	624.5	620.5
	0.418	619	625	618
	0.419	616.5	623	618
	0.42	617	625.5	620
	0.421	618	624	619
	0.422	614.5	626	621.5
	0.423	617	626.5	621.5
	0.424	615.5	622.5	618.5
	0.425	619.5	623	619.5
	0.426	612	625.5	620
	0.427	617.5	627.5	619.5
	0.428	616.5	623.5	620
	0.429	619	623	619.5
	0.43	616.5	629.5	617
	0.431	615.5	622	621
	0.432	616.5	624.5	618.5
	0.433	619	623.5	621
	0.434	616.5	626.5	623.5
	0.435	617	626	621
	0.436	619.5	623.5	617.5
	0.437	619	629	619.5
	0.438	618	626.5	619
	0.439	619	625	621
	0.44	618	625	622
	0.441	616	623.5	621
	0.442	617	622.5	617.5
	0.443	619	624.5	619.5
	0.444	620	623.5	623
	0.445	616	625	623
	0.446	618	625	623.5
	0.447	618	624.5	620
	0.448	620.5	624.5	622
	0.449	617	625.5	622
	0.45	618	622	622
	0.451	617	622	620.5
	0.452	620	622.5	622
	0.453	620.5	622	619
	0.454	620.5	623.5	622
	0.455	617	622.5	626.5
	0.456	622	628	621.5
	0.457	620.5	625.5	623
	0.458	618	623.5	619.5
	0.459	619.5	622	624
	0.46	622.5	623.5	624.5
	0.461	621	622	626.5
	0.462	617	624.5	622
	0.463	622	629.5	625
	0.464	619.5	624.5	620.5
	0.465	620	626	623.5
	0.466	620.5	624	622
	0.467	621	625.5	621
	0.468	620	621.5	621.5
	0.469	619.5	626.5	622
	0.47	621.5	623.5	629
	0.471	619	623.5	623.5
	0.472	619.5	626	625
	0.473	620	625.5	624.5
	0.474	620.5	622	620
	0.475	619	628	625
	0.476	622	625.5	626.5
	0.477	617	624	625
	0.478	624.5	627.5	623.5
	0.479	620.5	627	623
	0.48	622	620.5	622.5
	0.481	621	625	624.5
	0.482	623.5	622	624.5
	0.483	619.5	621.5	623.5
	0.484	618	623	621
	0.485	621.5	623.5	621.5
	0.486	621	621.5	626
	0.487	619	625	625
	0.488	623	625.5	623.5
	0.489	619	624.5	624.5
	0.49	620.5	623.5	626.5
	0.491	622	623	625.5
	0.492	625	624.5	622
	0.493	622	620.5	625.5
	0.494	623.5	622.5	619.5
	0.495	624	622.5	622
	0.496	624.5	621.5	623.5
	0.497	621	624	622.5
	0.498	623.5	620	623
	0.499	621.5	622	622
	0.5	622	623	621
	0.501	621.5	622.5	621
	0.502	623.5	621.5	619
	0.503	624.5	622	624.5
	0.504	622.5	621	623
	0.505	625	620	620
	0.506	625.5	619.5	621.5
	0.507	623	619.5	618.5
	0.508	625.5	620.5	620
	0.509	624	621	621.5
	0.51	623.5	620.5	621.5
	0.511	623	620.5	620.5
	0.512	624.5	617.5	618.5
	0.513	624	618	619
	0.514	624	618	619
	0.515	625	618.5	616.5
	0.516	624.5	616.5	619.5
	0.517	625	617	619
	0.518	623.5	619.5	620.5
	0.519	625.5	615.5	620
	0.52	622.5	615.5	618
	0.521	623.5	619	615.5
	0.522	624.5	617	615.5
	0.523	629	615.5	616
	0.524	622	614.5	617
	0.525	626	615.5	615.5
	0.526	626	619.5	615
	0.527	622	616.5	620
	0.528	622.5	620	615.5
	0.529	623	616.5	618
	0.53	627	618	616.5
	0.531	626.5	616	614
	0.532	623	614.5	617
	0.533	624.5	613	613.5
	0.534	625.5	614	610.5
	0.535	626	618	611
	0.536	622	616	611.5
	0.537	624	618	613.5
	0.538	622.5	615	613
	0.539	624	616	613
	0.54	627	615	609.5
	0.541	627	618	611.5
	0.542	626	617	611
	0.543	624.5	615.5	610.5
	0.544	628.5	615	610.5
	0.545	621.5	615	609
	0.546	622	615.5	612.5
	0.547	624	615	610.5
	0.548	626	618.5	611.5
	0.549	624	615.5	613.5
	0.55	624.5	617	610
	0.551	625	617	612
	0.552	623.5	616	612.5
	0.553	622	619.5	612.5
	0.554	624	619	610.5
	0.555	621.5	616.5	611
	0.556	622	619	611
	0.557	622	616	615.5
	0.558	621	619	612.5
	0.559	621	619	615
	0.56	624	619	613.5
	0.561	620.5	620	613
	0.562	621.5	620	613
	0.563	622	619.5	612.5
	0.564	621	622	614.5
	0.565	622	620	614.5
	0.566	619.5	620.5	611
	0.567	621	618.5	613.5
	0.568	621.5	617.5	615.5
	0.569	622	622	617
	0.57	620	621	615.5
	0.571	620.5	622	616.5
	0.572	619	620.5	616.5
	0.573	621.5	622	614.5
	0.574	623	622	616
	0.575	621	621	614.5
	0.576	620.5	626.5	617
	0.577	619.5	621	614.5
	0.578	617.5	623.5	617.5
	0.579	621.5	626	621
	0.58	617	621	620.5
	0.581	618	622.5	620.5
	0.582	624	623.5	619.5
	0.583	618.5	623.5	618.5
	0.584	618	624.5	620
	0.585	620	623.5	620
	0.586	619.5	625.5	622
	0.587	619.5	625	618
	0.588	615.5	625	620.5
	0.589	619	627.5	619
	0.59	618.5	623	625
	0.591	618.5	622	622
	0.592	619	622.5	622.5
	0.593	619	623.5	620.5
	0.594	621.5	623.5	622.5
	0.595	620.5	622.5	624.5
	0.596	620	622	626
	0.597	618	622.5	623.5
	0.598	618	621.5	623
	0.599	620.5	624.5	622.5
	0.6	621	628	624
	0.601	619	623	624
	0.602	618.5	626	624
	0.603	617.5	626.5	621
	0.604	620	623.5	623.5
	0.605	620.5	625.5	622.5
	0.606	619.5	627	625
	0.607	620.5	626	623
	0.608	621	628	623.5
	0.609	624	624.5	621.5
	0.61	618	628.5	623.5
	0.611	615.5	626	624.5
	0.612	626	623.5	622.5
	0.613	619	625.5	623.5
	0.614	622	624.5	622
	0.615	623	626	622
	0.616	624.5	625	626.5
	0.617	620.5	623	625
	0.618	617	627	624.5
	0.619	623	627	621
	0.62	622	624	622
	0.621	618.5	624.5	623.5
	0.622	622	623.5	624.5
	0.623	621	626	624.5
	0.624	622.5	625.5	621
	0.625	622	622	622
	0.626	622	628	622
	0.627	622	624	621
	0.628	620	622	621
	0.629	620	626	622.5
	0.63	622.5	622.5	621.5
	0.631	622	626	624.5
	0.632	621	620.5	621
	0.633	621	626.5	621
	0.634	619	624.5	621
	0.635	620	626.5	622
	0.636	620	628.5	625.5
	0.637	620.5	622	617
	0.638	621.5	623	620
	0.639	617.5	624	621.5
	0.64	620	626	620
	0.641	624.5	623.5	618
	0.642	620	627	622
	0.643	621	624	620
	0.644	622.5	626	623
	0.645	623	624.5	619
	0.646	621	624.5	620
	0.647	623.5	622.5	621
	0.648	619	625.5	622
	0.649	624	625	619.5
	0.65	620.5	624	618.5
	0.651	617.5	627	622
	0.652	619	629.5	619
	0.653	621	624	619
	0.654	617	626.5	621
	0.655	620.5	625	620.5
	0.656	620.5	624.5	622.5
	0.657	621	624	623
	0.658	620.5	626	625.5
	0.659	621.5	627.5	625
	0.66	619.5	627.5	624
	0.661	621	626	622
	0.662	623.5	627	623
	0.663	621	622	624.5
	0.664	620.5	626	621
	0.665	622	625.5	622
	0.666	620	626	622
	0.667	619.5	622	622
	0.668	619.5	625	627.5
	0.669	620	624	624
	0.67	621.5	623	623.5
	0.671	619	627	622
	0.672	618	629.5	623.5
	0.673	619	627	624.5
	0.674	622.5	628.5	625.5
	0.675	622.5	626	622
	0.676	618.5	622.5	626
	0.677	621.5	627.5	625.5
	0.678	618	624	622
	0.679	621	627	622.5
	0.68	620.5	626	623
	0.681	621.5	628.5	626
	0.682	622	624.5	623
	0.683	623.5	624	626.5
	0.684	622	624.5	626.5
	0.685	623	625	625
	0.686	619	625	626.5
	0.687	620	624.5	628
	0.688	619.5	629	625.5
	0.689	621	626	624.5
	0.69	619.5	623.5	624
	0.691	622.5	627	628.5
	0.692	621.5	624.5	628.5
	0.693	621.5	628.5	626.5
	0.694	621.5	626	628.5
	0.695	620.5	627	626
	0.696	624	626.5	627.5
	0.697	622.5	627.5	627.5
	0.698	622	623.5	626
	0.699	624.5	625.5	626.5
	0.7	619.5	625.5	630
	0.701	622	627.5	627.5
	0.702	621.5	624.5	626
	0.703	625	626.5	623.5
	0.704	625	621.5	626
	0.705	624.5	623.5	626.5
	0.706	622.5	622	628
	0.707	622	623.5	629
	0.708	620.5	622	627.5
	0.709	623.5	623	628.5
	0.71	626	625	629
	0.711	622	622	628.5
	0.712	621.5	623.5	630
	0.713	626	624.5	629
	0.714	627.5	624.5	628
	0.715	623.5	622	628.5
	0.716	624	622	629
	0.717	621	623.5	628
	0.718	623.5	620	628
	0.719	624.5	620	626.5
	0.72	625.5	623.5	628
	0.721	622	622	627.5
	0.722	621	622	629
	0.723	624	621	628.5
	0.724	623	620.5	625.5
	0.725	626	618.5	625.5
	0.726	620	618.5	626
	0.727	625	619.5	627.5
	0.728	622.5	620.5	627
	0.729	625	620	626.5
	0.73	627	620	628.5
	0.731	622.5	618	627
	0.732	624.5	622.5	628.5
	0.733	624	619.5	623
	0.734	622.5	619	629.5
	0.735	623	619	622
	0.736	627	621	625.5
	0.737	628	617.5	622
	0.738	628.5	619	624.5
	0.739	625.5	619.5	623
	0.74	622.5	620	626.5
	0.741	622	616.5	622
	0.742	626	618.5	624.5
	0.743	622.5	619.5	621
	0.744	622.5	617	624.5
	0.745	622.5	618.5	624
	0.746	628	617	623
	0.747	623	615.5	623.5
	0.748	622.5	617	621
	0.749	624.5	620	620
	0.75	622	615.5	621
	0.751	629.5	616.5	620.5
	0.752	623	616	622
	0.753	624.5	616.5	623
	0.754	625.5	617.5	620
	0.755	626	616	617
	0.756	622.5	618.5	621.5
	0.757	625	616	618.5
	0.758	624.5	619	622
	0.759	626	617	619
	0.76	624	619	617
	0.761	627.5	619.5	622
	0.762	626.5	619.5	621
	0.763	624	616	621.5
	0.764	624.5	618.5	615.5
	0.765	626	623.5	615.5
	0.766	622	618	617
	0.767	625	617	618
	0.768	628	616	614.5
	0.769	624.5	616.5	619
	0.77	627.5	618.5	618
	0.771	627	618.5	616
	0.772	619.5	620	616
	0.773	623	622	616
	0.774	622.5	619.5	615
	0.775	623.5	616.5	621
	0.776	621	621.5	620
	0.777	622	614.5	613
	0.778	622	619	615.5
	0.779	625	620	615
	0.78	623.5	617.5	617
	0.781	620.5	620.5	615.5
	0.782	625.5	619.5	614.5
	0.783	622	621	615
	0.784	625.5	622	614
	0.785	623	622	611
	0.786	621.5	620.5	615
	0.787	622	619	616
	0.788	621	617	615.5
	0.789	620	618	617
	0.79	621.5	621.5	615.5
	0.791	624	624.5	619
	0.792	619	621	614
	0.793	619	622.5	619.5
	0.794	622	624.5	618.5
	0.795	622	624	615.5
	0.796	614	626.5	615.5
	0.797	623	622	617
	0.798	622.5	623.5	621
	0.799	621.5	622	620
	0.8	619.5	623	615.5
	0.801	618	622	615.5
	0.802	621.5	622	619
	0.803	621	624	618.5
	0.804	619	623.5	617
	0.805	621.5	622.5	616
	0.806	622	622	616
	0.807	621	622	622
	0.808	619.5	622.5	615.5
	0.809	619.5	619	617
	0.81	620	624.5	617
	0.811	619.5	622.5	617
	0.812	617	623	619
	0.813	618	624	616.5
	0.814	618	624	617
	0.815	620	626.5	616.5
	0.816	617.5	623	616.5
	0.817	621.5	624.5	619
	0.818	615	624	619
	0.819	620	623	619.5
	0.82	617	621.5	617.5
	0.821	618	624	620
	0.822	617.5	629	618
	0.823	620	625.5	621
	0.824	616	622	623.5
	0.825	618	622	620.5
	0.826	617.5	621.5	619
	0.827	619.5	622	621
	0.828	616	622.5	622.5
	0.829	618	622	626
	0.83	618.5	622.5	624
	0.831	618.5	626	621
	0.832	617	623.5	619
	0.833	619.5	623.5	623
	0.834	617	622	626
	0.835	615	622.5	625.5
	0.836	619	621	624
	0.837	617	620.5	624
	0.838	618	622.5	626
	0.839	616.5	622.5	622.5
	0.84	619.5	620	626.5
	0.841	618.5	622.5	622
	0.842	617.5	619	627
	0.843	618	623	624.5
	0.844	616	624.5	624.5
	0.845	619	619.5	625.5
	0.846	616	618.5	625.5
	0.847	616.5	622.5	624
	0.848	616	618	624.5
	0.849	620	621.5	622
	0.85	621.5	622.5	624.5
	0.851	614.5	620.5	629
	0.852	619	617.5	625
	0.853	620	619	626
	0.854	616.5	623.5	626
	0.855	616	621	625
	0.856	616	616	621.5
	0.857	616	621	622
	0.858	619.5	622	628
	0.859	618.5	621	625
	0.86	616.5	622	622
	0.861	617	619	627
	0.862	617	621	625
	0.863	615.5	624.5	622
	0.864	618	621	620.5
	0.865	617	622	626.5
	0.866	616	623.5	622
	0.867	617.5	622.5	622
	0.868	615	619	622
	0.869	616.5	621.5	623
	0.87	619.5	620	624
	0.871	616	624.5	622.5
	0.872	615.5	622	621.5
	0.873	616	622	622
	0.874	617	622.5	621.5
	0.875	615	622.5	622.5
	0.876	620	623	625
	0.877	619.5	621.5	622
	0.878	618	623.5	622.5
	0.879	618.5	622.5	619
	0.88	618.5	623	621.5
	0.881	618	624.5	617
	0.882	618	622	618
	0.883	618	622	622
	0.884	620	620.5	619
	0.885	621	625.5	620
	0.886	619	624.5	619.5
	0.887	620	629	620
	0.888	620.5	622.5	618.5
	0.889	619.5	627.5	616.5
	0.89	619.5	625	618.5
	0.891	618.5	625	621
	0.892	624.5	627	620.5
	0.893	621	623.5	622.5
	0.894	622	625.5	617
	0.895	621	628.5	619
	0.896	619	624	620
	0.897	623	624	621.5
	0.898	619	627.5	619
	0.899	619	626.5	619.5
	0.9	622.5	625	618
	0.901	624	623	617
	0.902	622	625	619
	0.903	620.5	624.5	618.5
	0.904	622	622.5	620
	0.905	623.5	624.5	618
	0.906	622	625.5	621
	0.907	624	624	619
	0.908	622	626.5	620.5
	0.909	623.5	626.5	619.5
	0.91	622	624	617
	0.911	622	621	619
	0.912	625	625.5	619
	0.913	624.5	623	618
	0.914	623	622	620
	0.915	626	620.5	617
	0.916	619.5	625	619.5
	0.917	623	624	619
	0.918	622	622.5	621
	0.919	622	621.5	622
	0.92	621.5	622.5	617
	0.921	623	623.5	616.5
	0.922	623.5	621	618.5
	0.923	624.5	624.5	621
	0.924	619.5	617.5	623
	0.925	623	624	621
	0.926	624	622	619
	0.927	625.5	621.5	622.5
	0.928	622.5	624.5	620.5
	0.929	626.5	618	621.5
	0.93	627.5	621.5	620.5
	0.931	623.5	622.5	620
	0.932	625	618.5	624.5
	0.933	625	620.5	622.5
	0.934	624.5	619.5	626
	0.935	625.5	622	622
	0.936	622.5	617	621.5
	0.937	622	619	623
	0.938	623	621	622
	0.939	626	619	622
	0.94	624	617	621
	0.941	622	617	624.5
	0.942	625.5	617	625
	0.943	626.5	619.5	626.5
	0.944	622.5	619.5	624.5
	0.945	626	620.5	620.5
	0.946	626	619	625.5
	0.947	624	620	622
	0.948	623.5	620	622
	0.949	625.5	617.5	623.5
	0.95	622.5	620.5	623.5
	0.951	627	617	626
	0.952	624.5	617.5	625
	0.953	626	619.5	627.5
	0.954	626	616	626.5
	0.955	622.5	617	624
	0.956	626.5	616.5	621
	0.957	623.5	618.5	622
	0.958	624	619	621.5
	0.959	622	617	623.5
	0.96	622	618.5	622
	0.961	622	618.5	624.5
	0.962	624	618.5	622
	0.963	624.5	616.5	622
	0.964	623	618	622
	0.965	622	615.5	623
	0.966	622.5	618.5	625.5
	0.967	625.5	620.5	621.5
	0.968	622.5	616.5	624
	0.969	622.5	618.5	621
	0.97	623	619.5	622
	0.971	625.5	616.5	623.5
	0.972	620.5	618	620
	0.973	620	619	621.5
	0.974	621.5	620	621
	0.975	623.5	619.5	620
	0.976	622.5	622	621
	0.977	622	620.5	620
	0.978	619.5	619	622
	0.979	621	622	622
	0.98	622.5	619	622
	0.981	620	619	617
	0.982	620	618.5	620
	0.983	621	620	618
	0.984	623	621	620.5
	0.985	621	620	619.5
	0.986	618.5	622	623
	0.987	620	623	620
	0.988	623	623.5	617
	0.989	621	619.5	618
	0.99	622	619	617
	0.991	623.5	622	619
	0.992	621	619.5	617
	0.993	619	619.5	614
	0.994	619	619	616
	0.995	619	624	619
	0.996	619.5	622	618
	0.997	621	623.5	617.5
	0.998	620	624	617.5
	0.999	619.5	623.5	617.5
	1	619.5	622.5	617
	1.001	619	625	617
	1.002	620.5	624	617
	1.003	620	623.5	615
	1.004	621.5	622	615.5
	1.005	620	627	618.5
	1.006	620	623	618
	1.007	618.5	629	616
	1.008	618	623	620
	1.009	619	624.5	619.5
	1.01	619	623.5	617.5
	1.011	616.5	623.5	620
	1.012	615.5	623.5	618.5
	1.013	616.5	624.5	618
	1.014	618.5	624.5	618.5
	1.015	618	623	617
	1.016	618.5	625	619.5
	1.017	616.5	623.5	618.5
	1.018	619	620.5	618
	1.019	616	623	618.5
	1.02	618.5	624	621
	1.021	617	622.5	618.5
	1.022	615.5	626.5	620
	1.023	616.5	621	622
	1.024	618	625.5	618.5
	1.025	621.5	623.5	622.5
	1.026	619	623.5	618.5
	1.027	615.5	623	618.5
	1.028	615	622	620
	1.029	615.5	622	623.5
	1.03	616.5	622	620
	1.031	619	623	618.5
	1.032	618	626.5	621
	1.033	617.5	625	620.5
	1.034	616	621.5	622
	1.035	615.5	623	622
	1.036	617	623.5	621.5
	1.037	616	625.5	620
	1.038	615.5	622	618.5
	1.039	615.5	623	624.5
	1.04	619.5	625.5	622
	1.041	620	622	621.5
	1.042	618	622	625
	1.043	618	621	620.5
	1.044	617	624.5	625.5
	1.045	618.5	623	623
	1.046	617	626	623
	1.047	617	624.5	621.5
	1.048	616	623	621
	1.049	620	622.5	623
	1.05	615	622.5	622
	1.051	616	624	618
	1.052	620	621	621
	1.053	615.5	622.5	623.5
	1.054	618	621.5	622
	1.055	619	623	622
	1.056	618.5	625.5	620.5
	1.057	615.5	622	621
	1.058	616.5	624	621
	1.059	617	623	622
	1.06	617	627	622
	1.061	617.5	622	619.5
	1.062	614.5	624.5	622
	1.063	616.5	622	619.5
	1.064	619.5	626	621.5
	1.065	621	624.5	622.5
	1.066	617	624	621
	1.067	618	619	622
	1.068	617	621	619.5
	1.069	615.5	622	622.5
	1.07	620.5	624.5	622
	1.071	616.5	622	621
	1.072	620.5	619.5	620
	1.073	620	622.5	618.5
	1.074	622	619	621.5
	1.075	619.5	619.5	618
	1.076	615.5	624	619.5
	1.077	621.5	624.5	622
	1.078	615.5	621	624
	1.079	615	621	620.5
	1.08	622	622.5	619.5
	1.081	622.5	623	622
	1.082	621	622	618
	1.083	622	620	622
	1.084	622	621.5	621
	1.085	622	621.5	617
	1.086	620	623.5	620
	1.087	622	622	621
	1.088	620.5	621	619.5
	1.089	620.5	622	619
	1.09	621.5	622	621
	1.091	623.5	617	624
	1.092	622.5	620	622
	1.093	622.5	621	622.5
	1.094	623	622.5	620
	1.095	623.5	621.5	619
	1.096	620.5	618.5	622
	1.097	623.5	622	617
	1.098	624	620	620.5
	1.099	621	620.5	621
	1.1	625.5	618.5	618
	1.101	623	619.5	622.5
	1.102	625.5	624	618.5
	1.103	624.5	618.5	618.5
	1.104	622.5	620	619.5
	1.105	625.5	620.5	619.5
	1.106	625.5	617.5	620
	1.107	627.5	618.5	623
	1.108	625.5	617	621.5
	1.109	626	617	622
	1.11	627	618.5	623
	1.111	627	618.5	619
	1.112	625.5	620	622
	1.113	628.5	619	623.5
	1.114	620	619.5	622
	1.115	624	619.5	623
	1.116	622.5	618.5	619.5
	1.117	627	622	623.5
	1.118	624	618	624
	1.119	623	617.5	623.5
	1.12	622.5	619	625.5
	1.121	623	620	624
	1.122	624	618	621
	1.123	622	621.5	629
	1.124	624.5	620	620.5
	1.125	622.5	619.5	623.5
	1.126	624	620	625.5
	1.127	626	622	623.5
	1.128	622.5	618	622
	1.129	624	617	624
	1.13	622.5	621.5	624.5
	1.131	622	616	622
	1.132	623	621	624
	1.133	621.5	621.5	627.5
	1.134	624	619.5	622.5
	1.135	624.5	622	622
	1.136	622.5	619.5	624.5
	1.137	623	619.5	626
	1.138	624.5	622	624
	1.139	624	622.5	623.5
	1.14	623	620.5	623.5
	1.141	624.5	620	625
	1.142	622.5	620	624.5
	1.143	623.5	620.5	622
	1.144	624	620.5	621
	1.145	623.5	622	624.5
	1.146	623	622	625
	1.147	623.5	618.5	624
	1.148	623	620	624
	1.149	622.5	616	624
	1.15	623.5	622	623.5
	1.151	622	624.5	622.5
	1.152	622	617	625.5
	1.153	624	621.5	624
	1.154	622	620.5	624
	1.155	620	618.5	623
	1.156	622	619	622.5
	1.157	619.5	623.5	627.5
	1.158	625.5	621.5	621
	1.159	620.5	620.5	622.5
	1.16	621	621.5	628.5
	1.161	623	619.5	624.5
	1.162	622.5	615.5	620
	1.163	622	618.5	621.5
	1.164	618.5	622	620.5
	1.165	621	617	624.5
	1.166	619	621	624.5
	1.167	623.5	621.5	620.5
	1.168	622.5	623	622.5
	1.169	619.5	619	621.5
	1.17	622	618	622
	1.171	621	619.5	625.5
	1.172	621.5	617.5	624.5
	1.173	623	619	622.5
	1.174	623	622	622
	1.175	621	619.5	625.5
	1.176	620.5	621.5	622.5
	1.177	617	618.5	622.5
	1.178	617.5	620.5	624
	1.179	620	620	622
	1.18	620.5	620.5	624.5
	1.181	620	620	625
	1.182	622.5	621	621.5
	1.183	619.5	621	623
	1.184	619.5	616.5	622
	1.185	618.5	622.5	625
	1.186	621	618	622
	1.187	619	620	622.5
	1.188	615.5	623	621
	1.189	617.5	620.5	624
	1.19	617.5	623.5	624.5
	1.191	619	624	622
	1.192	620	621	628.5
	1.193	617	621	624.5
	1.194	617	623.5	621
	1.195	616.5	621.5	626
	1.196	617	625.5	622.5
	1.197	620	622.5	618.5
	1.198	615	623	617
	1.199	615	619	618
	1.2	614	626	624
	1.201	618.5	623.5	621.5
	1.202	618	624	623.5
	1.203	617.5	624.5	625.5
	1.204	614	625.5	620
	1.205	616.5	623.5	622
	1.206	618.5	623	623.5
	1.207	615	624.5	619.5
	1.208	614.5	624	620.5
	1.209	613.5	624	624.5
	1.21	614.5	625.5	622
	1.211	613	624.5	621
	1.212	613	625	622
	1.213	614	625.5	622
	1.214	617	623.5	621
	1.215	615.5	625.5	622
	1.216	615.5	622.5	624
	1.217	615.5	624.5	619
	1.218	612.5	622	622
	1.219	614	626.5	622
	1.22	615	628.5	620
	1.221	615.5	627	624.5
	1.222	613	625	625
	1.223	615.5	626	621
	1.224	615.5	626.5	620.5
	1.225	615.5	628.5	621.5
	1.226	612.5	629.5	621
	1.227	613.5	627	623.5
	1.228	614	628.5	622
	1.229	614.5	627.5	622
	1.23	614	627	622
	1.231	611.5	628.5	623
	1.232	615.5	627	627
	1.233	614	630.5	622.5
	1.234	613.5	629	622
	1.235	612.5	627.5	625.5
	1.236	617	629.5	621
	1.237	613.5	629	624
	1.238	612.5	630	619.5
	1.239	615	628.5	622
	1.24	610	628.5	625
	1.241	613.5	629	621.5
	1.242	610	628.5	622
	1.243	614.5	630	620.5
	1.244	614.5	628	618
	1.245	614.5	631	619.5
	1.246	613.5	629.5	621
	1.247	614	629	621
	1.248	614	632	622
	1.249	614.5	630	621.5
	1.25	613.5	629	621
	1.251	613.5	632	623
	1.252	614	629.5	620.5
	1.253	610.5	631	620.5
	1.254	617	630.5	619
	1.255	618.5	629.5	619.5
	1.256	612.5	631	621
	1.257	616	630	622
	1.258	617.5	633.5	621
	1.259	617	631.5	622
	1.26	614	626.5	618
	1.261	618	629.5	618.5
	1.262	619.5	634	622.5
	1.263	621	632	620.5
	1.264	615.5	632	619
	1.265	617	633	619.5
	1.266	615.5	631.5	621.5
	1.267	614.5	631.5	620.5
	1.268	616	632	622.5
	1.269	616	630	620.5
	1.27	620	630.5	616.5
	1.271	618.5	630	622.5
	1.272	615.5	629	622.5
	1.273	620.5	629	618.5
	1.274	619	632	622.5
	1.275	616	628	621
	1.276	618.5	632	623.5
	1.277	620	632	623
	1.278	619.5	634	620
	1.279	618	633.5	617.5
	1.28	619	630.5	622
	1.281	620	632	623
	1.282	621	626.5	624
	1.283	622	631	623.5
	1.284	620	630	623
	1.285	624.5	632	624
	1.286	622	629	623
	1.287	622	631.5	623.5
	1.288	620.5	631	624.5
	1.289	616.5	632	626.5
	1.29	621.5	630	622
	1.291	621.5	632	623.5
	1.292	624.5	629	623
	1.293	624.5	628.5	622.5
	1.294	622	632	624
	1.295	624.5	629.5	623.5
	1.296	627	631	624.5
	1.297	622.5	632	622
	1.298	623.5	631	623
	1.299	625	633.5	625
	1.3	625.5	635	623.5
	1.301	620	634	628
	1.302	625.5	631.5	626
	1.303	623	636	624
	1.304	622.5	632	624.5
	1.305	625.5	633.5	626.5
	1.306	622	636	630
	1.307	623	635	624
	1.308	624	636	625
	1.309	624.5	632	622.5
	1.31	623	638	628
	1.311	624	638	625.5
	1.312	625.5	632	623.5
	1.313	622.5	634.5	626
	1.314	627	635	627
	1.315	627	639.5	626.5
	1.316	626	638	625.5
	1.317	625	640.5	624
	1.318	628	637.5	626
	1.319	627	640.5	627.5
	1.32	628	641.5	627
	1.321	623	640.5	628
	1.322	623.5	639.5	624.5
	1.323	624.5	641	627.5
	1.324	620.5	639.5	625.5
	1.325	625.5	638.5	629
	1.326	626	641	627.5
	1.327	623.5	640.5	626
	1.328	622.5	642.5	626.5
	1.329	626	644.5	628.5
	1.33	626	643	621
	1.331	624.5	643	623
	1.332	625	644	621.5
	1.333	624.5	644	624
	1.334	626.5	643.5	624
	1.335	622	641.5	626
	1.336	622.5	644.5	622
	1.337	622	647	624
	1.338	623	649.5	623
	1.339	622	642	624.5
	1.34	625.5	644.5	626.5
	1.341	625	645.5	624.5
	1.342	626	642.5	625.5
	1.343	622	645.5	625
	1.344	622.5	645.5	625
	1.345	622.5	643	623
	1.346	624	647	624
	1.347	622	642.5	627.5
	1.348	624.5	646.5	624
	1.349	623	647	625
	1.35	620.5	641.5	623
	1.351	618.5	643	625.5
	1.352	623	642	622.5
	1.353	622	642.5	626
	1.354	619	643.5	620
	1.355	622	644.5	623.5
	1.356	618	643	624
	1.357	622	643	621.5
	1.358	621.5	640.5	622
	1.359	622	643	620
	1.36	618.5	642	624.5
	1.361	621	642.5	622.5
	1.362	618.5	640.5	620.5
	1.363	617.5	640.5	622
	1.364	620.5	640.5	622
	1.365	620.5	636.5	621.5
	1.366	619	640.5	617
	1.367	619	638	622
	1.368	614	637.5	621
	1.369	619	637.5	622
	1.37	615	636	622
	1.371	615.5	636	622.5
	1.372	617	636.5	622
	1.373	616.5	629	619.5
	1.374	619	632.5	622.5
	1.375	615.5	631	621.5
	1.376	615	629	621
	1.377	617	632	617
	1.378	614	631	621.5
	1.379	616.5	632	618.5
	1.38	616	627.5	621.5
	1.381	615.5	629	619.5
	1.382	616	629	618.5
	1.383	614.5	628	623
	1.384	615	627	621.5
	1.385	612	626.5	619
	1.386	612.5	624.5	620.5
	1.387	612.5	625	620.5
	1.388	613.5	621	621.5
	1.389	615.5	625.5	621
	1.39	616.5	623.5	621
	1.391	610	625	620
	1.392	609.5	621	621
	1.393	609	620	619
	1.394	611.5	622	620
	1.395	612	620.5	621
	1.396	611.5	619	623
	1.397	612.5	621	619.5
	1.398	611	619.5	619.5
	1.399	610.5	621.5	622.5
	1.4	609.5	618	620.5
	1.401	613.5	619	619.5
	1.402	614	616.5	621
	1.403	612	620.5	619.5
	1.404	615.5	615.5	619
	1.405	615	615.5	621.5
	1.406	617	614	621.5
	1.407	614.5	614	622
	1.408	616	614.5	622.5
	1.409	615	609.5	623
	1.41	617.5	612.5	622.5
	1.411	618.5	609	621.5
	1.412	616.5	609	624
	1.413	622	609.5	622
	1.414	622	608	621
	1.415	620	602	619
	1.416	619	606	622
	1.417	619.5	601.5	623.5
	1.418	618	602	620
	1.419	622	601.5	623
	1.42	622.5	599.5	625
	1.421	622	596	622
	1.422	622	597	624
	1.423	623.5	594.5	623.5
	1.424	620	593.5	622
	1.425	623	594	622
	1.426	620	589.5	624.5
	1.427	622	587.5	626.5
	1.428	628.5	586.5	625
	1.429	626.5	586	624.5
	1.43	627	585.5	624.5
	1.431	629.5	581	627.5
	1.432	630	578	624
	1.433	624.5	581	628
	1.434	626	577	629
	1.435	629	569.5	625
	1.436	631.5	572.5	628
	1.437	632	567.5	626.5
	1.438	631.5	564.5	623
	1.439	629	561.5	625
	1.44	631.5	557.5	627.5
	1.441	636	556	629
	1.442	630.5	551.5	627
	1.443	632	549	628.5
	1.444	634.5	543.5	627.5
	1.445	636	539	630.5
	1.446	636	538	629
	1.447	636	530.5	629
	1.448	636	532.5	632
	1.449	636	524.5	630.5
	1.45	638.5	520	630.5
	1.451	637	515.5	632
	1.452	642	509	629
	1.453	638	505.5	628.5
	1.454	641.5	502	629
	1.455	641	497.5	632
	1.456	644.5	489.5	630
	1.457	640.5	487	634.5
	1.458	643.5	480	634
	1.459	641.5	475.5	631
	1.46	644.5	471.5	632
	1.461	646.5	465	632
	1.462	641	459.5	631.5
	1.463	644.5	455	636
	1.464	646	452	635.5
	1.465	645.5	444.5	635
	1.466	646.5	444.5	636
	1.467	643	436.5	635
	1.468	645	433.5	634.5
	1.469	647	431	637
	1.47	645	423.5	633.5
	1.471	643.5	419	637
	1.472	646	414.5	639.5
	1.473	646	413	640.5
	1.474	647	408	637.5
	1.475	647	406	640
	1.476	643	400.5	637
	1.477	647	397.5	638
	1.478	646.5	392	640.5
	1.479	644	395.5	638.5
	1.48	646	388	636
	1.481	646	383.5	640.5
	1.482	645	381	639.5
	1.483	643.5	378.5	638.5
	1.484	644.5	371.5	639.5
	1.485	645	370	638
	1.486	641	365	641
	1.487	643	365.5	642.5
	1.488	642.5	363	641
	1.489	640	356	638
	1.49	642.5	353	641
	1.491	644	348.5	639.5
	1.492	642	345.5	641.5
	1.493	643	347	640.5
	1.494	639.5	340.5	639
	1.495	643	339.5	639
	1.496	640.5	335	643
	1.497	643	332	637
	1.498	639.5	328	640.5
	1.499	640.5	323	636
	1.5	639	320	636.5
	1.501	638	319	637.5
	1.502	635	314.5	638
	1.503	636.5	311	633.5
	1.504	632	307.5	635.5
	1.505	632	305.5	634
	1.506	634	301	635.5
	1.507	629	296	631
	1.508	632	295	632
	1.509	626.5	292	630
	1.51	624	288.5	626.5
	1.511	626.5	285.5	630.5
	1.512	622.5	282.5	627.5
	1.513	622	276	623
	1.514	622	272.5	622.5
	1.515	616	269	622
	1.516	617	262	624
	1.517	614	261.5	623.5
	1.518	612.5	259.5	618.5
	1.519	613	257	617
	1.52	608.5	249	616
	1.521	606	247.5	613.5
	1.522	604	243	611.5
	1.523	603.5	239.5	608.5
	1.524	601.5	237.5	606
	1.525	600.5	232.5	608.5
	1.526	594	226	609
	1.527	594	227	604
	1.528	596.5	224.5	601.5
	1.529	590	219.5	596
	1.53	591	213	598
	1.531	587.5	213	595.5
	1.532	587.5	207.5	593.5
	1.533	582.5	206.5	589.5
	1.534	586	203.5	587.5
	1.535	577.5	198.5	584.5
	1.536	577	196	580
	1.537	572.5	194	575.5
	1.538	575	188.5	574.5
	1.539	568.5	189.5	572.5
	1.54	569	184.5	568.5
	1.541	566.5	179	565.5
	1.542	565	174	562
	1.543	559	176.5	560.5
	1.544	562	171.5	555
	1.545	560.5	170.5	552
	1.546	556.5	170	549
	1.547	556	164	546
	1.548	555	164	540
	1.549	554	158.5	540
	1.55	549.5	157	537
	1.551	545	153	533.5
	1.552	547.5	153	527.5
	1.553	542.5	154	522.5
	1.554	546	148.5	519.5
	1.555	540.5	148.5	516
	1.556	541	146.5	510.5
	1.557	537	149	506
	1.558	537.5	141	503
	1.559	530	140	494.5
	1.56	532	141	495.5
	1.561	531.5	141	488.5
	1.562	532.5	138	486.5
	1.563	530.5	136.5	480.5
	1.564	527.5	134.5	478.5
	1.565	530	134.5	474
	1.566	527.5	134	472.5
	1.567	527.5	129	468
	1.568	523	129.5	460.5
	1.569	524	129.5	458
	1.57	526	131.5	451
	1.571	523	127.5	448
	1.572	520	128.5	444.5
	1.573	521.5	128	440.5
	1.574	520	127.5	436
	1.575	520.5	125.5	430
	1.576	519	124	424
	1.577	514	123	427
	1.578	517.5	123.5	418
	1.579	512.5	124.5	417
	1.58	514	124.5	408.5
	1.581	511	124	405
	1.582	512	124	402
	1.583	513	124.5	399
	1.584	510.5	124.5	393.5
	1.585	512	126	391.5
	1.586	507	123.5	385.5
	1.587	506	124	378.5
	1.588	506	129	383
	1.589	505.5	125	375
	1.59	500	126	369
	1.591	495	126	369
	1.592	495	126.5	362
	1.593	492.5	128	357
	1.594	488.5	128	356
	1.595	488	128.5	348.5
	1.596	483	129.5	346
	1.597	483	129	342
	1.598	483	130	335
	1.599	476.5	134	335.5
	1.6	473	132	330.5
	1.601	468	135.5	326
	1.602	465.5	137.5	325
	1.603	459.5	138.5	320
	1.604	456	142	315.5
	1.605	450.5	138.5	310
	1.606	449.5	145	309.5
	1.607	444.5	145	305
	1.608	438	149.5	300.5
	1.609	435	149	294
	1.61	427	150	294
	1.611	426	152	288
	1.612	419	154	284.5
	1.613	414.5	155	280.5
	1.614	404.5	157.5	275
	1.615	398	159	274.5
	1.616	393.5	163	268.5
	1.617	390.5	166	262
	1.618	381.5	165.5	259
	1.619	378	170.5	253.5
	1.62	371	166	253
	1.621	365	169.5	247
	1.622	358.5	174	244
	1.623	354	179.5	238.5
	1.624	345.5	179.5	236.5
	1.625	342.5	181.5	231
	1.626	338.5	185	229.5
	1.627	331	183	226
	1.628	324.5	190	220.5
	1.629	321	192.5	216
	1.63	312	191.5	215.5
	1.631	311.5	198.5	209
	1.632	303.5	200.5	205.5
	1.633	296	199	205
	1.634	295	202.5	197.5
	1.635	291.5	204.5	193.5
	1.636	285.5	208	191
	1.637	276.5	212	191
	1.638	278	213.5	190.5
	1.639	268	215	183.5
	1.64	264.5	216	177.5
	1.641	260.5	220.5	176
	1.642	254.5	224	177
	1.643	248	224.5	172
	1.644	248.5	227	167.5
	1.645	243	228.5	167
	1.646	240.5	236	166
	1.647	235	244.5	162.5
	1.648	236	247.5	160.5
	1.649	232.5	253	158.5
	1.65	230	255	156.5
	1.651	226.5	257	152.5
	1.652	224	261.5	154
	1.653	220	266.5	149.5
	1.654	221	273	151
	1.655	215	276	144
	1.656	213.5	281.5	147.5
	1.657	212.5	287.5	142.5
	1.658	207	294	143.5
	1.659	210	300.5	143.5
	1.66	203.5	302.5	140
	1.661	205	308	139.5
	1.662	203.5	313	136
	1.663	196	317	138.5
	1.664	196	322	137.5
	1.665	195	326.5	136.5
	1.666	196.5	332	136
	1.667	190.5	338.5	134
	1.668	191.5	340.5	137
	1.669	188.5	345	136.5
	1.67	186.5	348	134
	1.671	182.5	348.5	133
	1.672	184.5	351	133
	1.673	180	358	131.5
	1.674	181	362.5	134.5
	1.675	180	363.5	138
	1.676	178.5	366.5	138
	1.677	175.5	375	136.5
	1.678	175.5	376.5	132.5
	1.679	173	381.5	136.5
	1.68	174.5	382.5	140
	1.681	176	386.5	133.5
	1.682	173.5	389.5	140
	1.683	174	392	136.5
	1.684	170.5	399.5	138.5
	1.685	170	406	141.5
	1.686	169.5	408.5	141.5
	1.687	170.5	414	142
	1.688	171.5	420	142.5
	1.689	169.5	427	144.5
	1.69	167	430.5	148
	1.691	169.5	434.5	146.5
	1.692	168	444	149
	1.693	169	445.5	150.5
	1.694	165.5	452	154
	1.695	170	459	155
	1.696	170	465	155.5
	1.697	167	472	160.5
	1.698	164.5	481	159.5
	1.699	165	482	163
	1.7	166.5	495	166
	1.701	166	501.5	169.5
	1.702	165	509.5	171
	1.703	164.5	516	170
	1.704	167.5	523	174
	1.705	165	526.5	176.5
	1.706	167.5	537	180.5
	1.707	171.5	547	181.5
	1.708	167	555	181.5
	1.709	169.5	563	185
	1.71	169	574.5	186.5
	1.711	169	583	187.5
	1.712	171	590.5	196.5
	1.713	173	598.5	195
	1.714	171	612	197.5
	1.715	171	620	201.5
	1.716	172.5	631	199.5
	1.717	171	642.5	203.5
	1.718	173	651.5	205.5
	1.719	171	666.5	209.5
	1.72	175.5	674.5	206.5
	1.721	172.5	684	211
	1.722	173.5	701.5	216
	1.723	175	713.5	212
	1.724	175.5	721.5	218
	1.725	175	734.5	216.5
	1.726	178	746.5	216.5
	1.727	178.5	762.5	223.5
	1.728	177	771.5	226
	1.729	176.5	784	228
	1.73	178.5	796	228
	1.731	178.5	814	229.5
	1.732	178	822.5	229.5
	1.733	182.5	836.5	235
	1.734	182.5	842.5	233.5
	1.735	182.5	857.5	234
	1.736	182.5	870.5	235.5
	1.737	183.5	882	232.5
	1.738	184.5	895.5	237
	1.739	184.5	904	238.5
	1.74	189	914.5	240.5
	1.741	190	927.5	240.5
	1.742	190	937	244.5
	1.743	192	943.5	244.5
	1.744	192	951.5	246.5
	1.745	193	960	246
	1.746	192.5	967.5	247.5
	1.747	193.5	980	246
	1.748	197.5	983	249
	1.749	198.5	989	250.5
	1.75	200.5	994.5	253
	1.751	200.5	1004.5	259.5
	1.752	205	1008	256
	1.753	204	1017.5	259
	1.754	203.5	1016	260
	1.755	208	1026	262
	1.756	210	1029.5	263
	1.757	209.5	1032.5	264
	1.758	211	1034.5	265.5
	1.759	210	1046	267.5
	1.76	212	1048	270.5
	1.761	217.5	1055.5	276
	1.762	219.5	1060.5	276
	1.763	223	1064.5	280
	1.764	225	1064.5	284.5
	1.765	225.5	1078	290.5
	1.766	231	1086.5	293.5
	1.767	231.5	1090	298.5
	1.768	234	1096.5	305
	1.769	233	1102.5	306
	1.77	239.5	1109	312
	1.771	241.5	1118	317.5
	1.772	243.5	1124	321.5
	1.773	246	1133	328
	1.774	251	1138.5	333.5
	1.775	251.5	1142.5	336
	1.776	253.5	1154	343.5
	1.777	256	1158.5	350.5
	1.778	258.5	1166.5	353
	1.779	261	1173	362
	1.78	266	1178	371
	1.781	265	1183	376
	1.782	271	1192	379.5
	1.783	271	1196	387.5
	1.784	277.5	1198.5	388
	1.785	280	1206.5	395.5
	1.786	278	1213.5	399
	1.787	284	1217.5	405
	1.788	287	1225.5	411
	1.789	291	1230.5	418
	1.79	294	1238	425
	1.791	295.5	1243.5	426.5
	1.792	298	1250.5	437.5
	1.793	300	1258.5	443.5
	1.794	308.5	1266.5	445.5
	1.795	308	1273	452.5
	1.796	311.5	1280.5	458
	1.797	315.5	1286	465
	1.798	321	1293.5	473.5
	1.799	321.5	1299	477.5
	1.8	321.5	1303	483
	1.801	323.5	1311.5	485
	1.802	328	1316.5	495
	1.803	332	1325	503
	1.804	332	1329	507.5
	1.805	334	1337	513
	1.806	336	1338.5	524
	1.807	337	1344	531.5
	1.808	343.5	1347	536
	1.809	344	1350.5	542.5
	1.81	348.5	1357	552
	1.811	351.5	1362	559.5
	1.812	357.5	1362.5	563
	1.813	357.5	1362.5	568
	1.814	359	1370	577.5
	1.815	366	1374	586.5
	1.816	368.5	1381	594
	1.817	370	1380	601
	1.818	376	1388	608.5
	1.819	378.5	1385	617.5
	1.82	385	1388.5	625.5
	1.821	390.5	1392.5	637
	1.822	393.5	1398	642
	1.823	399.5	1398.5	651.5
	1.824	405.5	1404.5	659
	1.825	407.5	1402.5	670
	1.826	414.5	1407.5	677
	1.827	420	1407.5	687
	1.828	427.5	1412	695
	1.829	436.5	1407.5	702
	1.83	441.5	1415.5	706.5
	1.831	448.5	1416	718
	1.832	457.5	1418.5	727.5
	1.833	465	1419.5	739
	1.834	470	1422.5	745.5
	1.835	472.5	1422.5	753.5
	1.836	485	1428	760.5
	1.837	491	1422.5	766
	1.838	501.5	1427.5	777.5
	1.839	508.5	1431	790
	1.84	518.5	1434	793
	1.841	526.5	1436.5	808
	1.842	533.5	1437	814.5
	1.843	547.5	1442.5	824.5
	1.844	554	1443.5	832
	1.845	565	1448	842.5
	1.846	571.5	1450	850
	1.847	580	1450	862
	1.848	593	1452	874
	1.849	605	1455	885.5
	1.85	615	1457	894.5
	1.851	624	1457	902.5
	1.852	637	1459.5	921
	1.853	647	1457	933.5
	1.854	657	1462	945
	1.855	669.5	1457	957.5
	1.856	681	1459.5	970.5
	1.857	692.5	1465	988
	1.858	701	1462.5	998.5
	1.859	712.5	1459	1011
	1.86	724	1461.5	1022.5
	1.861	739	1462.5	1034.5
	1.862	750	1462.5	1049.5
	1.863	758	1467	1059
	1.864	769.5	1459.5	1073.5
	1.865	782	1460.5	1080.5
	1.866	793	1459.5	1093
	1.867	802	1457	1103.5
	1.868	810	1458.5	1114
	1.869	820.5	1457	1120
	1.87	829.5	1460.5	1129
	1.871	837	1455.5	1136.5
	1.872	847	1456.5	1142.5
	1.873	858	1459	1152
	1.874	862.5	1457	1153.5
	1.875	872	1454.5	1154
	1.876	878.5	1454	1163.5
	1.877	885.5	1452	1167
	1.878	896	1454	1176
	1.879	902.5	1454	1174
	1.88	910.5	1452	1174.5
	1.881	923	1451.5	1182.5
	1.882	930	1452	1182.5
	1.883	933	1451.5	1183.5
	1.884	940	1449.5	1183.5
	1.885	951.5	1449	1189.5
	1.886	959	1448	1189
	1.887	966.5	1445.5	1192
	1.888	978	1442.5	1196.5
	1.889	986.5	1443	1200
	1.89	992	1440.5	1201.5
	1.891	998	1437	1205
	1.892	1004	1435.5	1207
	1.893	1010	1434	1207
	1.894	1019.5	1433	1214.5
	1.895	1028	1429.5	1219
	1.896	1034.5	1429.5	1223.5
	1.897	1038.5	1422	1224.5
	1.898	1046.5	1422.5	1228.5
	1.899	1055.5	1418.5	1236.5
	1.9	1060.5	1416.5	1240
	1.901	1064.5	1417	1243.5
	1.902	1078.5	1413	1252.5
	1.903	1085	1407.5	1258.5
	1.904	1089.5	1410	1263.5
	1.905	1095	1405	1269.5
	1.906	1104.5	1403.5	1278.5
	1.907	1115.5	1402	1282
	1.908	1122	1401.5	1287.5
	1.909	1134.5	1401	1292
	1.91	1142.5	1392.5	1302
	1.911	1149	1392.5	1303
	1.912	1160.5	1392.5	1310.5
	1.913	1168	1392.5	1317.5
	1.914	1174.5	1392	1325
	1.915	1183.5	1389	1328
	1.916	1191	1392.5	1333
	1.917	1201.5	1390	1346
	1.918	1215	1385	1347.5
	1.919	1219	1390.5	1347.5
	1.92	1227.5	1388.5	1359.5
	1.921	1238.5	1382.5	1362
	1.922	1242	1387.5	1362.5
	1.923	1252	1386.5	1369
	1.924	1257.5	1384	1374.5
	1.925	1268.5	1383	1377.5
	1.926	1273	1380.5	1383
	1.927	1282.5	1376.5	1386
	1.928	1288	1375.5	1388
	1.929	1299.5	1375	1392.5
	1.93	1303	1376.5	1392.5
	1.931	1317	1381.5	1398
	1.932	1318	1376	1399
	1.933	1328	1374.5	1402
	1.934	1333	1377.5	1401.5
	1.935	1340.5	1375.5	1405.5
	1.936	1347.5	1374.5	1405.5
	1.937	1356.5	1376.5	1407.5
	1.938	1361.5	1377.5	1407
	1.939	1362.5	1377.5	1407.5
	1.94	1375.5	1381	1406
	1.941	1381	1377.5	1407.5
	1.942	1386	1377.5	1407.5
	1.943	1392.5	1377.5	1407.5
	1.944	1392.5	1375.5	1406
	1.945	1398	1377.5	1405.5
	1.946	1407.5	1377.5	1407.5
	1.947	1415	1377.5	1406.5
	1.948	1416.5	1376.5	1404
	1.949	1420	1375.5	1406
	1.95	1422.5	1380.5	1405.5
	1.951	1429.5	1377.5	1400.5
	1.952	1430.5	1375	1404.5
	1.953	1432.5	1376	1402
	1.954	1437	1374.5	1402.5
	1.955	1437	1377	1401
	1.956	1444.5	1382	1400.5
	1.957	1445	1381.5	1398.5
	1.958	1451.5	1386	1392.5
	1.959	1453.5	1381.5	1399
	1.96	1457.5	1382	1392.5
	1.961	1461.5	1388.5	1392.5
	1.962	1465	1390.5	1392.5
	1.963	1470	1392.5	1392.5
	1.964	1473	1392.5	1392.5
	1.965	1477	1392.5	1392.5
	1.966	1482	1399	1392.5
	1.967	1482	1401	1392.5
	1.968	1492	1407	1392.5
	1.969	1496	1410.5	1392.5
	1.97	1499.5	1412	1389.5
	1.971	1500	1412.5	1391
	1.972	1504.5	1420.5	1388.5
	1.973	1508.5	1421.5	1387
	1.974	1511.5	1422.5	1385
	1.975	1516.5	1429.5	1385.5
	1.976	1519	1432.5	1384.5
	1.977	1522.5	1436	1383
	1.978	1529.5	1437	1380.5
	1.979	1530.5	1442.5	1382.5
	1.98	1535.5	1444	1377.5
	1.981	1540	1444	1375.5
	1.982	1538.5	1451	1376.5
	1.983	1541.5	1452	1370
	1.984	1541.5	1455.5	1373
	1.985	1541.5	1457	1369
	1.986	1552	1458	1369.5
	1.987	1552.5	1461	1362.5
	1.988	1556.5	1464	1362.5
	1.989	1554	1462	1361
	1.99	1553	1467	1361.5
	1.991	1556.5	1470.5	1359.5
	1.992	1556.5	1472.5	1360.5
	1.993	1556	1475.5	1360
[truncated: 6,006 more rows]

## Sheet: I
DataTypeVer2.0	Time	Fz	Fz	Fz
NumberOfData		15000	15000	15000
PreTriggerData		0	0	0
SamplingTime[ms]		1	1	1
DataLabel		AL1:CMJ	AL2:CMJ	AL3:CMJ
DataUnit	sec	N	N	N
	0	611.5	608.5	608.5
	0.001	611.5	611	606.5
	0.002	610	606.5	609
	0.003	609.5	605.5	608.5
	0.004	609	606.5	610.5
	0.005	612.5	606.5	606.5
	0.006	609	609	610
	0.007	611.5	608	608.5
	0.008	609	608	608.5
	0.009	615	609	606
	0.01	608.5	609	606.5
	0.011	609.5	609	608.5
	0.012	612	611.5	606.5
	0.013	608.5	608.5	609.5
	0.014	611.5	613	609
	0.015	610.5	607.5	608
	0.016	611.5	608.5	610
	0.017	612	608	606.5
	0.018	609.5	606	610
	0.019	610.5	608.5	612
	0.02	613.5	609	610
	0.021	615	609	609.5
	0.022	613	604	611
	0.023	613	611.5	613.5
	0.024	612	612.5	610.5
	0.025	612	608.5	608.5
	0.026	611.5	608	610
	0.027	614.5	610.5	612.5
	0.028	612	608	609.5
	0.029	613.5	611.5	606.5
	0.03	612.5	611	612.5
	0.031	610.5	606.5	611.5
	0.032	616.5	610	612
	0.033	611	610.5	611.5
	0.034	610	611	613
	0.035	615.5	609	606.5
	0.036	611.5	611	609
	0.037	613.5	610	612
	0.038	615	609	612
	0.039	611	610	609.5
	0.04	613.5	613	609.5
	0.041	613	614	608
	0.042	615.5	612	610
	0.043	614	614	608.5
	0.044	617	609.5	612
	0.045	613	612.5	610.5
	0.046	615.5	611.5	610.5
	0.047	611	614	609
	0.048	612.5	616	613.5
	0.049	615	614	612
	0.05	616	612.5	609
	0.051	612.5	612.5	610.5
	0.052	612.5	615.5	611
	0.053	614.5	616.5	609
	0.054	615.5	608.5	614.5
	0.055	612	612	611
	0.056	612	615.5	611
	0.057	610	614	615
	0.058	611	612.5	612
	0.059	614.5	615	610.5
	0.06	611.5	615	613
	0.061	611	617	613
	0.062	611.5	612	612
	0.063	610	610	612
	0.064	615.5	613	614
	0.065	611	615.5	612.5
	0.066	609	616.5	610
	0.067	609.5	612	612
	0.068	608.5	615.5	609.5
	0.069	608.5	617	608.5
	0.07	612	617	613.5
	0.071	611	613	606.5
	0.072	612.5	615	615
	0.073	610.5	612.5	611.5
	0.074	606.5	615.5	612
	0.075	608.5	611.5	612
	0.076	610	612	611
	0.077	606.5	614	610.5
	0.078	609.5	615.5	613
	0.079	606.5	616	614.5
	0.08	606	612	615
	0.081	604.5	614.5	610
	0.082	609	614	609.5
	0.083	608.5	615	610
	0.084	606.5	615.5	613.5
	0.085	609	610	613
	0.086	610	613.5	614.5
	0.087	606	611	606.5
	0.088	605.5	614.5	615
	0.089	604	616.5	608.5
	0.09	605.5	614.5	615.5
	0.091	608	611.5	611.5
	0.092	603.5	613.5	609
	0.093	606	612	611
	0.094	605	612	610.5
	0.095	606.5	615	611.5
	0.096	606	615.5	609
	0.097	604.5	615	606.5
	0.098	605.5	613.5	608
	0.099	606	615.5	606.5
	0.1	606.5	614	611
	0.101	604.5	613.5	611
	0.102	602	613.5	609.5
	0.103	604.5	612.5	610.5
	0.104	605.5	611.5	608.5
	0.105	605	616	612
	0.106	606.5	614	611
	0.107	605.5	612	609
	0.108	606.5	614	606.5
	0.109	608.5	610	610
	0.11	604.5	611.5	606
	0.111	606.5	611	608.5
	0.112	604	614	606.5
	0.113	603	614	608
	0.114	605	613	608.5
	0.115	606.5	615	608
	0.116	608.5	612.5	608.5
	0.117	606.5	614.5	612
	0.118	606	613	611
	0.119	606.5	612	605.5
	0.12	612	613.5	610
	0.121	606	613	609.5
	0.122	609	613.5	612.5
	0.123	612	608	611.5
	0.124	609	611	612
	0.125	610	611	611
	0.126	606.5	611	610
	0.127	608.5	611.5	609.5
	0.128	613	612	609.5
	0.129	610	612	609.5
	0.13	612.5	609.5	612
	0.131	610	611	612.5
	0.132	610.5	615	614.5
	0.133	610.5	609.5	611.5
	0.134	609	613	614.5
	0.135	610	611	610.5
	0.136	614.5	612	613.5
	0.137	614	612	612.5
	0.138	610	608	614.5
	0.139	614	610	611.5
	0.14	611	612	615.5
	0.141	615	609	614
	0.142	616	610	612.5
	0.143	612	612	613.5
	0.144	609	613.5	616.5
	0.145	612.5	609	615.5
	0.146	614	613	613.5
	0.147	609	609	615
	0.148	612	609.5	614
	0.149	609.5	612	618.5
	0.15	609	608.5	614.5
	0.151	615.5	608.5	618
	0.152	614	608.5	616.5
	0.153	615	611	620.5
	0.154	613.5	608	618
	0.155	612.5	608.5	616.5
	0.156	615.5	610	618.5
	0.157	610	608.5	617.5
	0.158	610	608.5	616
	0.159	611.5	606.5	616.5
	0.16	612.5	608.5	616
	0.161	611	610	615
	0.162	612.5	606	619.5
	0.163	609	606.5	616
	0.164	612.5	605	617
	0.165	613.5	605.5	617
	0.166	612	606	615
	0.167	612	611.5	615.5
	0.168	614.5	605	618
	0.169	614	606	616.5
	0.17	609.5	605.5	615.5
	0.171	611	608.5	616.5
	0.172	614	609	615.5
	0.173	608.5	603.5	614
	0.174	608.5	606	617
	0.175	611.5	604	618
	0.176	611.5	609.5	612
	0.177	610	605	615.5
	0.178	611.5	602	615.5
	0.179	614	608	613.5
	0.18	613	603.5	616.5
	0.181	610.5	605	612.5
	0.182	610.5	606.5	612.5
	0.183	608.5	604	614
	0.184	610.5	606	615
	0.185	611	604.5	611
	0.186	609	605.5	613
	0.187	608.5	603.5	615.5
	0.188	610	604	614
	0.189	606.5	605	609
	0.19	613	603.5	611
	0.191	610	606.5	611.5
	0.192	606.5	604	606.5
	0.193	608.5	604	609
	0.194	609.5	604	603.5
	0.195	611	604.5	608.5
	0.196	610	606.5	606.5
	0.197	611.5	606.5	604
	0.198	609	606.5	603.5
	0.199	611.5	608.5	603.5
	0.2	609.5	606.5	604.5
	0.201	611.5	611	602.5
	0.202	611	608	605
	0.203	608.5	609.5	604
	0.204	613	606.5	603
	0.205	608.5	608.5	601.5
	0.206	612.5	606.5	601.5
	0.207	612	606.5	604
	0.208	612.5	605.5	601
	0.209	610	606.5	602.5
	0.21	612	609	603.5
	0.211	611	606.5	600.5
	0.212	612	605.5	599
	0.213	612	609	600
	0.214	610.5	606.5	601.5
	0.215	609.5	608.5	599.5
	0.216	609	608.5	601.5
	0.217	611.5	611	597.5
	0.218	611	604.5	602
	0.219	613	606	597
	0.22	613.5	606.5	599
	0.221	612	609.5	599
	0.222	612.5	609.5	601
	0.223	612	606.5	600
	0.224	615	608.5	600
	0.225	611	613.5	599
	0.226	614	610.5	601.5
	0.227	614	610	601
	0.228	612.5	612.5	598.5
	0.229	613.5	611	599.5
	0.23	614	611	600
	0.231	612.5	615	603
	0.232	613.5	611.5	603
	0.233	613	613	602.5
	0.234	611.5	611	602
	0.235	614.5	610.5	603.5
	0.236	617	613.5	603
	0.237	615.5	613	605.5
	0.238	615.5	615	606.5
	0.239	613.5	610.5	605.5
	0.24	614	610	606
	0.241	614	613	611.5
	0.242	610	615	606.5
	0.243	614.5	612	604.5
	0.244	615.5	612	609
	0.245	616.5	614	611
	0.246	610	614	610.5
	0.247	614.5	615.5	609
	0.248	611.5	613	610.5
	0.249	613	617.5	610
	0.25	614	617	609
	0.251	614	612.5	608.5
	0.252	611.5	615.5	614
	0.253	613	613.5	612.5
	0.254	610.5	611	612
	0.255	613.5	613	613.5
	0.256	616	614.5	612
	0.257	615	611.5	610.5
	0.258	615	612	611.5
	0.259	612.5	611.5	613.5
	0.26	611.5	610.5	612
	0.261	611	613	614
	0.262	614	611	615
	0.263	614	613.5	617
	0.264	615.5	613.5	618.5
	0.265	613	613	616
	0.266	610	609.5	613.5
	0.267	612	612.5	614
	0.268	610.5	612.5	616.5
	0.269	612	613	614.5
	0.27	610.5	613.5	612.5
	0.271	611	614.5	616.5
	0.272	614	612.5	617
	0.273	612	612	618.5
	0.274	611.5	613.5	618.5
	0.275	609.5	615	618.5
	0.276	610	614	616.5
	0.277	611	615.5	612.5
	0.278	608.5	613.5	614.5
	0.279	609	612	616.5
	0.28	609	611	614.5
	0.281	611.5	611.5	614.5
	0.282	612.5	610.5	615
	0.283	608.5	617	614
	0.284	606.5	616.5	616
	0.285	609	613.5	614
	0.286	606	613.5	616.5
	0.287	610.5	612.5	615
	0.288	610.5	616.5	611.5
	0.289	606.5	612	613
	0.29	606.5	614	614
	0.291	609.5	610.5	614
	0.292	610	611.5	609.5
	0.293	613.5	613	616
	0.294	610.5	612.5	612.5
	0.295	606.5	613	609.5
	0.296	612	613	613.5
	0.297	609	611.5	610
	0.298	608.5	611.5	606.5
	0.299	609.5	612	610.5
	0.3	611	613.5	610
	0.301	611.5	614	611
	0.302	608.5	612	610.5
	0.303	612	613	606.5
	0.304	608.5	614.5	609
	0.305	608.5	616	615
	0.306	605	613.5	609.5
	0.307	610	614.5	609.5
	0.308	612	612.5	611
	0.309	609	613	610.5
	0.31	611	612	610.5
	0.311	610	613.5	612
	0.312	613.5	614	606.5
	0.313	611	610.5	609
	0.314	611	614	610
	0.315	609.5	614.5	611
	0.316	610.5	612	609.5
	0.317	610.5	615.5	611
	0.318	606.5	619.5	612
	0.319	606.5	614.5	613.5
	0.32	611.5	612	613.5
	0.321	611.5	615.5	611
	0.322	610	614	610.5
	0.323	613	618.5	611
	0.324	610.5	615	608.5
	0.325	610.5	616.5	612.5
	0.326	610	613.5	610.5
	0.327	610	616	608
	0.328	610	617.5	609
	0.329	609.5	616.5	614
	0.33	610	617	615.5
	0.331	610	617.5	609
	0.332	609	617.5	610.5
	0.333	609	618	612
	0.334	608	615.5	612.5
	0.335	610.5	617.5	612
	0.336	611.5	614.5	613.5
	0.337	610.5	616.5	613
	0.338	612	615.5	611
	0.339	612	614.5	614
	0.34	612.5	613.5	613.5
	0.341	610	618.5	615
	0.342	611	616.5	612
	0.343	614	612	614
	0.344	608.5	615	616.5
	0.345	615.5	612	615.5
	0.346	613	616	615.5
	0.347	611	615.5	615
	0.348	610.5	613	616.5
	0.349	612	614.5	614.5
	0.35	612	615.5	617.5
	0.351	615	613	617
	0.352	613	611	615.5
	0.353	612	612	616
	0.354	609	610.5	613
	0.355	612	613.5	617
	0.356	612.5	613	609.5
	0.357	612	617.5	615.5
	0.358	610	613	615.5
	0.359	614	612	614
	0.36	611	606.5	617
	0.361	615.5	615.5	617
	0.362	612	612.5	616.5
	0.363	611.5	610.5	614
	0.364	611	614	613.5
	0.365	613	611.5	617
	0.366	613	609.5	616.5
	0.367	609.5	609.5	616
	0.368	613	613.5	617
	0.369	613.5	612	616
	0.37	613.5	609.5	616
	0.371	613.5	606.5	611
	0.372	611.5	606.5	615.5
	0.373	612.5	605.5	614.5
	0.374	612	611	615.5
	0.375	614	610	614
	0.376	609	606.5	614
	0.377	608.5	610	614
	0.378	613	608	610.5
	0.379	611.5	608.5	613
	0.38	609	606.5	615
	0.381	611.5	606	608.5
	0.382	611	608.5	612
	0.383	610.5	606.5	609.5
	0.384	608.5	606.5	613
	0.385	609.5	606.5	612
	0.386	610.5	605.5	610
	0.387	611	605	608.5
	0.388	611	606.5	609.5
	0.389	614	606.5	608.5
	0.39	611	602	611.5
	0.391	614.5	603	606.5
	0.392	610	605.5	610.5
	0.393	613	603.5	608.5
	0.394	613.5	606.5	610
	0.395	609	606.5	604
	0.396	608.5	609	610
	0.397	610.5	608.5	606
	0.398	608.5	606	608.5
	0.399	611	605	605
	0.4	611	605.5	606.5
	0.401	606.5	606.5	606.5
	0.402	610	605.5	604.5
	0.403	613	605.5	606.5
	0.404	610	605.5	603.5
	0.405	612.5	606.5	604
	0.406	612	602.5	606
	0.407	612	608.5	602
	0.408	608.5	604.5	605
	0.409	610	603	604
	0.41	611.5	603.5	603
	0.411	611	605	608
	0.412	612.5	606.5	605.5
	0.413	611.5	608.5	605
	0.414	613.5	606.5	606.5
	0.415	613	609.5	603.5
	0.416	614	608.5	604
	0.417	613	608.5	602.5
	0.418	608.5	606.5	602.5
	0.419	612	612	602
	0.42	613.5	610	604
	0.421	608.5	612	606
	0.422	611.5	610.5	606.5
	0.423	610.5	614	606.5
	0.424	612.5	613.5	606.5
	0.425	612.5	613	601.5
	0.426	612.5	613.5	603.5
	0.427	613	614	605.5
	0.428	611	610.5	609
	0.429	612.5	614.5	608
	0.43	613.5	616	609.5
	0.431	609	614.5	608.5
	0.432	610.5	615.5	606.5
	0.433	613	611	608.5
	0.434	612.5	614	609.5
	0.435	613.5	615.5	606
	0.436	611	615.5	605.5
	0.437	613.5	615.5	608.5
	0.438	612	614.5	608.5
	0.439	613	614	610
	0.44	614.5	614.5	611
	0.441	614	618.5	610
	0.442	608.5	614.5	612
	0.443	614	616.5	613
	0.444	611.5	615.5	609.5
	0.445	614	617	609
	0.446	612.5	615.5	609.5
	0.447	613.5	617.5	610.5
	0.448	611.5	616.5	613
	0.449	613.5	618	614
	0.45	613.5	618	611
	0.451	617	616	612
	0.452	612	615	612
	0.453	614	615	615
	0.454	615.5	615	615
	0.455	615.5	612.5	615.5
	0.456	614	615.5	615.5
	0.457	614.5	616	615
	0.458	615.5	614.5	611.5
	0.459	615.5	615.5	612
	0.46	614	615.5	614.5
	0.461	616	616.5	616
	0.462	611	615	613
	0.463	618.5	615.5	617
	0.464	611.5	612	613
	0.465	615	614.5	616.5
	0.466	615	613.5	616.5
	0.467	614	613.5	617.5
	0.468	616	612	616.5
	0.469	616	613	614
	0.47	612	615.5	614
	0.471	612	611.5	617
	0.472	615	612	615.5
	0.473	614	611.5	616.5
	0.474	609.5	612	612
	0.475	610.5	611.5	616
	0.476	617	610	616.5
	0.477	615.5	612	613
	0.478	611	614.5	613
	0.479	610.5	610	617
	0.48	613.5	610.5	611
	0.481	610	610	612
	0.482	615	611	614
	0.483	611	610.5	615.5
	0.484	614	611	615.5
	0.485	612	610.5	615.5
	0.486	614	609	614.5
	0.487	614	608.5	615.5
	0.488	614.5	609.5	610
	0.489	612	606	611
	0.49	615	610.5	612
	0.491	612	613	615.5
	0.492	610	612	614.5
	0.493	612	611.5	608.5
	0.494	613	605.5	613
	0.495	611.5	611.5	612
	0.496	613.5	608.5	613
	0.497	613	608.5	615
	0.498	610	606.5	610
	0.499	613.5	609	611
	0.5	609.5	611	613.5
	0.501	614	609	608.5
	0.502	611.5	609.5	610
	0.503	610.5	612	611.5
	0.504	611	605	613
	0.505	608	610	610
	0.506	611.5	612	608.5
	0.507	606.5	609	611
	0.508	610	610	612
	0.509	612	612	611
	0.51	611.5	610	609
	0.511	610	612	606.5
	0.512	611.5	608.5	606.5
	0.513	609	608.5	611.5
	0.514	608.5	611.5	610
	0.515	611.5	613.5	609
	0.516	610.5	613.5	610
	0.517	606.5	610	611
	0.518	609	611	610.5
	0.519	608.5	614	611
	0.52	610	614.5	610
	0.521	606.5	611	610
	0.522	606.5	609	613
	0.523	608.5	610	610.5
	0.524	606.5	611.5	611.5
	0.525	608.5	615.5	611
	0.526	604.5	615.5	606.5
	0.527	609.5	612.5	608.5
	0.528	605	616	613.5
	0.529	608.5	617	613.5
	0.53	605	615.5	613
	0.531	606	613.5	613
	0.532	608	614.5	613
	0.533	606.5	615.5	614.5
	0.534	606.5	618	613.5
	0.535	604.5	612.5	613
	0.536	608	615	614.5
	0.537	608.5	615.5	617.5
	0.538	606.5	617.5	615.5
	0.539	605	615.5	614.5
	0.54	605.5	616.5	619.5
	0.541	606	617.5	616
	0.542	608.5	613.5	616
	0.543	606.5	616	614.5
	0.544	611	615.5	616
	0.545	608	613	615.5
	0.546	608.5	615	615
	0.547	606.5	617	617.5
	0.548	606.5	613	618
	0.549	605.5	613.5	619.5
	0.55	608.5	616.5	619
	0.551	606	615.5	620
	0.552	608.5	615	614.5
	0.553	606.5	614.5	615.5
	0.554	606.5	613	614
	0.555	608.5	615.5	618
	0.556	606.5	611	615.5
	0.557	606.5	612.5	616.5
	0.558	609	618.5	618
	0.559	610	615.5	613.5
	0.56	610	613.5	618
	0.561	609.5	614	617.5
	0.562	608.5	614	616
	0.563	609	611.5	614.5
	0.564	609.5	613.5	615.5
	0.565	606.5	612	618
	0.566	608.5	615.5	615.5
	0.567	611	609	617.5
	0.568	610.5	613	615
	0.569	611	612	614.5
	0.57	611	608.5	614
	0.571	613	609.5	611.5
	0.572	612	609.5	615.5
	0.573	607.5	609.5	610.5
	0.574	606.5	609	614
	0.575	611	610.5	613
	0.576	611	610	614
	0.577	611	609	617.5
	0.578	606.5	610	615.5
	0.579	611.5	612	610
	0.58	609	606.5	610
	0.581	609.5	608.5	613.5
	0.582	608.5	608.5	612.5
	0.583	608	606.5	609
	0.584	609	608	612.5
	0.585	608.5	608	606.5
	0.586	609	606.5	612
	0.587	606.5	606.5	612
	0.588	610	604.5	610
	0.589	606.5	606.5	606
	0.59	609	606.5	610.5
	0.591	609.5	605.5	609
	0.592	609	604	610
	0.593	609.5	609	608
	0.594	611.5	604	610.5
	0.595	610	604	609
	0.596	608.5	604	608.5
	0.597	608.5	614	610
	0.598	613	606	606
	0.599	610	603.5	609
	0.6	610	606	606.5
	0.601	611.5	606.5	606.5
	0.602	611.5	608.5	610
	0.603	612	601.5	608.5
	0.604	613	606.5	608.5
	0.605	609	607.5	606.5
	0.606	610.5	604.5	608.5
	0.607	608.5	606.5	606.5
	0.608	610.5	608.5	604
	0.609	609	602.5	604.5
	0.61	611.5	603	608.5
	0.611	608	601.5	606.5
	0.612	611	606	611
	0.613	612.5	603.5	607.5
	0.614	609.5	605	604
	0.615	609.5	605.5	605
	0.616	611.5	606.5	605.5
	0.617	614	600.5	605
	0.618	613	602.5	602
	0.619	610.5	605	606.5
	0.62	612.5	605	605
	0.621	612.5	606.5	604.5
	0.622	614	606.5	605.5
	0.623	610	608.5	603.5
	0.624	609	606	608.5
	0.625	606.5	606.5	606
	0.626	612	608.5	606.5
	0.627	613	604.5	605
	0.628	612.5	606.5	606.5
	0.629	611.5	606	606.5
	0.63	615.5	608.5	604.5
	0.631	612.5	609.5	608.5
	0.632	612.5	606	604.5
	0.633	613	608.5	606.5
	0.634	610	608.5	604
	0.635	614.5	608	606.5
	0.636	611	611	608.5
	0.637	613	608	606.5
	0.638	614.5	611.5	610.5
	0.639	612.5	609.5	605.5
	0.64	609	608	604
	0.641	613.5	611	606
	0.642	614	611.5	606.5
	0.643	614	610	606.5
	0.644	615	612.5	606
	0.645	612.5	612.5	608.5
	0.646	612	611	608.5
	0.647	613	609.5	604.5
	0.648	615	613	606.5
	0.649	614	608.5	606
	0.65	615.5	611	608.5
	0.651	615.5	610	606.5
	0.652	612	610	606
	0.653	615.5	611	604.5
	0.654	615	611.5	608.5
	0.655	619.5	612	608.5
	0.656	615	611.5	606.5
	0.657	614	611	606.5
	0.658	616	612.5	606.5
	0.659	613.5	609.5	608.5
	0.66	615.5	611	606.5
	0.661	615	612	611.5
	0.662	615	610	606.5
	0.663	617.5	614.5	606.5
	0.664	617.5	614	611
	0.665	615.5	611	606
	0.666	617.5	610	606.5
	0.667	619.5	612	605.5
	0.668	613.5	613.5	605.5
	0.669	615.5	613	606.5
	0.67	614	610	606.5
	0.671	618	610	605.5
	0.672	614	610.5	609
	0.673	616	611	605.5
	0.674	615.5	609.5	608.5
	0.675	615.5	615	608.5
	0.676	614	611.5	609.5
	0.677	614	611	606.5
	0.678	618.5	612	608.5
	0.679	611	612.5	606.5
	0.68	615.5	614.5	608
	0.681	614.5	611.5	608.5
	0.682	618	611	610
	0.683	612	609	609
	0.684	614.5	611.5	606.5
	0.685	615.5	610.5	608.5
	0.686	615	609	608.5
	0.687	613.5	610	608
	0.688	614	611.5	608.5
	0.689	613	611.5	609
	0.69	612	614	606.5
	0.691	615	615.5	606.5
	0.692	614	613	608.5
	0.693	619.5	609	606.5
	0.694	615	606.5	609.5
	0.695	613.5	610.5	611
	0.696	615	612.5	609.5
	0.697	611.5	613.5	609
	0.698	612	613	612.5
	0.699	615.5	613	613.5
	0.7	611	614	612.5
	0.701	612	608.5	609
	0.702	612.5	612	608.5
	0.703	611.5	614.5	612.5
	0.704	608	613.5	611
	0.705	611	611	616
	0.706	612.5	615.5	609
	0.707	610	612	611.5
	0.708	608.5	612.5	611.5
	0.709	611	612	614
	0.71	611	611	613
	0.711	610	611	612.5
	0.712	610	612.5	616
	0.713	610.5	615	613
	0.714	611	610.5	615.5
	0.715	608.5	613	614
	0.716	608.5	613.5	613.5
	0.717	607.5	613	615.5
	0.718	611	615	620.5
	0.719	609	612.5	616.5
	0.72	606	614	615.5
	0.721	609.5	612	618
	0.722	608.5	613	617
	0.723	610	612	615
	0.724	606.5	612.5	616.5
	0.725	609.5	615.5	615.5
	0.726	611	612.5	615.5
	0.727	608.5	615.5	613.5
	0.728	610	611	619.5
	0.729	611.5	617.5	615.5
	0.73	608	617	617.5
	0.731	609.5	611.5	615.5
	0.732	609.5	618.5	618.5
	0.733	611	615.5	618
	0.734	612.5	615.5	616.5
	0.735	611	614	621.5
	0.736	612	616	618.5
	0.737	609.5	614	620.5
	0.738	611	615.5	616.5
	0.739	606.5	613	619.5
	0.74	610.5	611.5	615.5
	0.741	608.5	615.5	617.5
	0.742	609	616.5	617.5
	0.743	613.5	617	619.5
	0.744	611.5	615.5	619
	0.745	609	617	619
	0.746	608	615.5	618.5
	0.747	609	614.5	618.5
	0.748	610.5	618	621
	0.749	612	613	615.5
	0.75	609.5	613	616.5
	0.751	610.5	615.5	620.5
	0.752	610.5	616.5	617
	0.753	610	614.5	619
	0.754	611.5	613	615.5
	0.755	611	613	616
	0.756	610.5	614	615
	0.757	611	612.5	615
	0.758	609	615	615
	0.759	610.5	612.5	616.5
	0.76	610	610	618
	0.761	612	613	614.5
	0.762	612.5	611.5	614
	0.763	613	610.5	618
	0.764	613	608	613.5
	0.765	610.5	612.5	615.5
	0.766	613.5	611.5	616.5
	0.767	611	611	613.5
	0.768	612	612.5	609.5
	0.769	612	614	614
	0.77	611	614.5	611.5
	0.771	612	609.5	610
	0.772	614	612.5	611.5
	0.773	611	608.5	613
	0.774	613	606.5	613
	0.775	616	609	614.5
	0.776	610	610.5	610
	0.777	612	610	614
	0.778	615.5	609	611
	0.779	613	610	612
	0.78	614	613.5	612
	0.781	614	609	614
	0.782	612	606.5	609.5
	0.783	611	609	610
	0.784	610	608.5	613.5
	0.785	613	608.5	608.5
	0.786	610	608	611.5
	0.787	614.5	606.5	608.5
	0.788	612	606.5	609
	0.789	613	608.5	608.5
	0.79	610	612.5	610
	0.791	611	609	608
	0.792	612	606.5	610.5
	0.793	614	608	606.5
	0.794	610	611	613
	0.795	611	606.5	608.5
	0.796	614	606.5	611
	0.797	609.5	610	610.5
	0.798	610.5	606.5	606.5
	0.799	612	608.5	606.5
	0.8	609.5	606.5	609.5
	0.801	610.5	606.5	609
	0.802	611.5	606.5	610
	0.803	606.5	609.5	612.5
	0.804	611.5	609.5	610
	0.805	609	609.5	611
	0.806	610	610.5	612
	0.807	606.5	608.5	611
	0.808	611.5	610	611.5
	0.809	606.5	604.5	612.5
	0.81	610	609.5	613
	0.811	609	610.5	612
	0.812	610.5	611.5	611.5
	0.813	606.5	611	613.5
	0.814	612.5	610	614.5
	0.815	609.5	612	612.5
	0.816	609.5	605.5	610.5
	0.817	611.5	609	615.5
	0.818	609	612.5	612
	0.819	606.5	608.5	610.5
	0.82	609.5	609.5	613.5
	0.821	610	613	613.5
	0.822	610	612	615
	0.823	611	611.5	613
	0.824	608.5	610	616
	0.825	612	611.5	615
	0.826	613.5	612	615.5
	0.827	606.5	610	615.5
	0.828	609	610	614
	0.829	606.5	613	615.5
	0.83	608.5	606.5	612.5
	0.831	609.5	611	615.5
	0.832	606.5	609	613
	0.833	606.5	614	615
	0.834	609.5	614	613.5
	0.835	611.5	613.5	614
	0.836	609	610	617.5
	0.837	613.5	611.5	617.5
	0.838	612	613.5	613.5
	0.839	610.5	612	612
	0.84	609.5	612	615
	0.841	614	613	615.5
	0.842	612	610	615.5
	0.843	610.5	609	614
	0.844	611.5	612	614.5
	0.845	612.5	612	613
	0.846	611	615.5	614
	0.847	610	612	613.5
	0.848	611.5	614	614.5
	0.849	610.5	611	613.5
	0.85	612.5	612	613
	0.851	611	612	613.5
	0.852	615	611.5	613.5
	0.853	613	609	610
	0.854	611	608.5	612.5
	0.855	609	608.5	613.5
	0.856	614	608.5	614.5
	0.857	610	609.5	610
	0.858	613.5	613.5	611
	0.859	615	611	611
	0.86	612	609.5	614
	0.861	614	609.5	606.5
	0.862	613	611	614
	0.863	611	609.5	610.5
	0.864	615.5	612.5	609
	0.865	610	608.5	608.5
	0.866	615.5	610	613
	0.867	614	608.5	610
	0.868	611.5	611.5	606.5
	0.869	613.5	608.5	608.5
	0.87	615.5	606.5	606
	0.871	614	609.5	608.5
	0.872	613.5	609.5	608
	0.873	615.5	606.5	606.5
	0.874	614.5	609.5	609.5
	0.875	614	609	603
	0.876	613	609	606.5
	0.877	614.5	604.5	606.5
	0.878	615	606.5	607.5
	0.879	615	606.5	606
	0.88	612.5	609.5	606
	0.881	612	609	606.5
	0.882	614	609	603.5
	0.883	613.5	610	603.5
	0.884	613.5	609	605.5
	0.885	616.5	608.5	605.5
	0.886	612.5	608	608.5
	0.887	614.5	609.5	603
	0.888	611	610	604.5
	0.889	615.5	608.5	604
	0.89	615	606.5	605
	0.891	616	611	602
	0.892	614.5	612.5	606.5
	0.893	614.5	606.5	606.5
	0.894	615	611	606.5
	0.895	615	611	605
	0.896	615.5	608.5	606.5
	0.897	612.5	608.5	606.5
	0.898	612.5	609.5	603.5
	0.899	615.5	615.5	605.5
	0.9	613.5	610	605
	0.901	613.5	612	603.5
	0.902	613.5	609	606.5
	0.903	611	611.5	606.5
	0.904	613.5	614	609
	0.905	611.5	612.5	606.5
	0.906	615.5	609	604.5
	0.907	612.5	608.5	608.5
	0.908	615.5	610.5	605.5
	0.909	613.5	611.5	608.5
	0.91	612.5	610	606.5
	0.911	613	610	606.5
	0.912	615.5	608	609.5
	0.913	613.5	612.5	606.5
	0.914	614.5	613.5	611.5
	0.915	614	609	609
	0.916	610.5	612.5	610
	0.917	613	611.5	610.5
	0.918	613	613	609.5
	0.919	611.5	612	614
	0.92	614	614	614.5
	0.921	615.5	613	613
	0.922	612	613	612.5
	0.923	610.5	611.5	611.5
	0.924	609	615	612
	0.925	611.5	614	613
	0.926	613.5	614	617.5
	0.927	611	614	613.5
	0.928	612	613.5	614
	0.929	614	615	615
	0.93	615	615.5	612
	0.931	614	614	613.5
	0.932	616.5	614	613.5
	0.933	613	614	614
	0.934	610	616	615
	0.935	610.5	611	614.5
	0.936	615	610.5	615
	0.937	614	614	618
	0.938	610.5	612.5	614
	0.939	612.5	614	615.5
	0.94	612	616	615
	0.941	615.5	615.5	614.5
	0.942	610.5	616	615.5
	0.943	610	617	615.5
	0.944	612	617.5	613
	0.945	609	616.5	614.5
	0.946	612	616	615.5
	0.947	610	618	618
	0.948	613.5	617	617
	0.949	609.5	613	615.5
	0.95	612.5	615.5	616
	0.951	610.5	620	614
	0.952	613.5	615.5	614
	0.953	610	615	615.5
	0.954	613.5	614	615
	0.955	612	615.5	615
	0.956	606.5	611	615
	0.957	612	616	618
	0.958	614	618	612.5
	0.959	611.5	613.5	612
	0.96	609	614	614
	0.961	606.5	615.5	616
	0.962	610	614.5	614
	0.963	610	610.5	615.5
	0.964	610	613.5	615
	0.965	608.5	615	610
	0.966	610	613.5	611.5
	0.967	611	614	611.5
	0.968	608	614.5	609.5
	0.969	608.5	610.5	612
	0.97	609.5	608.5	609
	0.971	609	613.5	612
	0.972	608.5	608.5	612
	0.973	609	609	611.5
	0.974	608.5	611.5	611
	0.975	608	614	610
	0.976	606	609	609
	0.977	610.5	611.5	610
	0.978	609.5	611.5	611.5
	0.979	608.5	612	610
	0.98	606.5	610	609.5
	0.981	606.5	609.5	609
	0.982	606.5	605	610.5
	0.983	605.5	610.5	609
	0.984	605	610.5	609
	0.985	604.5	606	609
	0.986	606.5	606	610.5
	0.987	605	608.5	608.5
	0.988	605.5	606.5	608.5
	0.989	606.5	609	606.5
	0.99	604.5	606.5	611
	0.991	606.5	606.5	611
	0.992	606.5	606.5	609.5
	0.993	606.5	606.5	609
	0.994	604	606.5	606.5
	0.995	604.5	606.5	608.5
	0.996	606	608.5	608.5
	0.997	603.5	604.5	609
	0.998	604	608.5	606.5
	0.999	606.5	604	609.5
	1	606.5	609	610
	1.001	606.5	608	611.5
	1.002	608.5	608	610
	1.003	605	608.5	613.5
	1.004	605	606	609
	1.005	602.5	606.5	608.5
	1.006	605	608.5	610.5
	1.007	606	608.5	612.5
	1.008	605.5	605	612
	1.009	603	606	612
	1.01	605.5	605.5	611
	1.011	604.5	610.5	614.5
	1.012	605.5	606	610.5
	1.013	604.5	608.5	614.5
	1.014	606.5	609	613
	1.015	604.5	606	615.5
	1.016	605.5	608.5	619
	1.017	606.5	608.5	613.5
	1.018	604.5	606.5	618.5
	1.019	604	609	615
	1.02	605	605.5	616
	1.021	606.5	605.5	614
	1.022	605.5	609.5	614.5
	1.023	609	606.5	612.5
	1.024	603.5	605.5	611
	1.025	606.5	606.5	614
	1.026	605	611.5	611.5
	1.027	609	609.5	618
	1.028	606.5	611	613
	1.029	608.5	610	614
	1.03	609.5	608.5	609.5
	1.031	606.5	605.5	614.5
	1.032	608.5	608.5	615.5
	1.033	610.5	606.5	617.5
	1.034	606.5	606.5	615
	1.035	606	610	613.5
	1.036	611.5	606.5	615.5
	1.037	606.5	608.5	616
	1.038	609	606.5	616
	1.039	614	606.5	615
	1.04	610.5	606.5	613.5
	1.041	611.5	606.5	610.5
	1.042	609.5	608.5	613.5
	1.043	612	606.5	611
	1.044	613	606.5	606.5
	1.045	614	609	611.5
	1.046	611	610.5	609.5
	1.047	613.5	609.5	610
	1.048	613.5	608.5	613
	1.049	616	611.5	611.5
	1.05	614	610	609
	1.051	615.5	609	608.5
	1.052	611.5	608	608.5
	1.053	610.5	611	608.5
	1.054	613	611	613
	1.055	610.5	610	604.5
	1.056	612	610	609.5
	1.057	608.5	606.5	606.5
	1.058	611	611	611
	1.059	616	608.5	606.5
	1.06	616	610.5	610.5
	1.061	615.5	608.5	605.5
	1.062	614	610.5	608
	1.063	616	611	606.5
	1.064	612	611	603.5
	1.065	612	609	608.5
	1.066	612	608	606.5
	1.067	615.5	606	606.5
	1.068	616.5	610.5	604.5
	1.069	612.5	609	608.5
	1.07	615	608.5	606.5
	1.071	612.5	606	603.5
	1.072	615	608.5	606
	1.073	612	608.5	604.5
	1.074	612	610	603.5
	1.075	611.5	608.5	606
	1.076	613	614	606.5
	1.077	611	606	603.5
	1.078	614	609.5	605.5
	1.079	613.5	609.5	602
	1.08	612	608	602.5
	1.081	610.5	608.5	604
	1.082	613.5	608	602.5
	1.083	615.5	609	602.5
	1.084	610.5	608.5	601.5
	1.085	615.5	610	606.5
	1.086	612	610	604.5
	1.087	614	605.5	602.5
	1.088	614.5	606.5	604
	1.089	613	609	606
	1.09	610	610	605
	1.091	610	610	604.5
	1.092	611	612	606
	1.093	611.5	610	606
	1.094	614	606.5	608.5
	1.095	615	608.5	604.5
	1.096	613.5	610.5	601.5
	1.097	612	606.5	603
	1.098	611.5	606.5	603.5
	1.099	606.5	610.5	606.5
	1.1	610	610	604
	1.101	609	610	606.5
	1.102	615.5	611	604.5
	1.103	608.5	606.5	606
	1.104	611.5	610	603.5
	1.105	610	605.5	604.5
	1.106	611	610.5	608.5
	1.107	613.5	609	606.5
	1.108	609.5	606.5	611.5
	1.109	611	612.5	609
	1.11	612.5	607.5	611
	1.111	611	608.5	612
	1.112	615.5	608.5	611.5
	1.113	615	610.5	611.5
	1.114	612	610.5	615
	1.115	610	611	611.5
	1.116	612	608.5	613
	1.117	614	611	613.5
	1.118	613	611	615.5
	1.119	613	606.5	614
	1.12	612	609	614
	1.121	614	613	616
	1.122	613.5	611	615.5
	1.123	614	608.5	614
	1.124	615	611	617
	1.125	612	609.5	619
	1.126	611	613	619.5
	1.127	609.5	612.5	618.5
	1.128	615	610.5	619.5
	1.129	613	611.5	623
	1.13	613.5	612.5	617.5
	1.131	612	612.5	620.5
	1.132	610	611	622
	1.133	615.5	614.5	617
	1.134	613	615.5	620.5
	1.135	615.5	612	619.5
	1.136	614	612	622
	1.137	613.5	614	623
	1.138	613	614	619
	1.139	613.5	612	621.5
	1.14	613	615	621.5
	1.141	615.5	611.5	622
	1.142	612	613.5	619.5
	1.143	615.5	611.5	621.5
	1.144	612.5	613.5	619
	1.145	615	612.5	622.5
	1.146	614.5	617.5	619.5
	1.147	614	614.5	622.5
	1.148	615.5	615.5	621
	1.149	614	617.5	622.5
	1.15	613.5	620.5	622
	1.151	614.5	615	619
	1.152	614	617	619.5
	1.153	612	614	619
	1.154	614	620	621
	1.155	613	619	618.5
	1.156	612	617	620.5
	1.157	613	616	616
	1.158	613.5	616	616
	1.159	610	618.5	615.5
	1.16	615.5	620.5	613
	1.161	610	620.5	615.5
	1.162	611	618.5	615
	1.163	611.5	619.5	616.5
	1.164	613	618.5	613
	1.165	611.5	616	617.5
	1.166	615.5	615.5	615.5
	1.167	612.5	618	613.5
	1.168	612	615	615.5
	1.169	612.5	617	613
	1.17	611	616	614
	1.171	610	615.5	614
	1.172	615	616	610.5
	1.173	609.5	615.5	614
	1.174	613.5	611	612
	1.175	610	616.5	613.5
	1.176	610.5	613.5	613
	1.177	610.5	615.5	610.5
	1.178	609.5	615.5	615.5
	1.179	613.5	615.5	609
	1.18	614	613	611
	1.181	609	613.5	612
	1.182	611.5	615.5	610.5
	1.183	610.5	615.5	608.5
	1.184	608.5	613.5	611.5
	1.185	612.5	612	606.5
	1.186	608.5	613	610
	1.187	612.5	614.5	606.5
	1.188	614	610	608
	1.189	611.5	611	608
	1.19	609	614	610
	1.191	609.5	611.5	608.5
	1.192	609	613	608.5
	1.193	608.5	613.5	606
	1.194	609	610.5	606.5
	1.195	608.5	610.5	608.5
	1.196	606.5	614	606.5
	1.197	606.5	609	606.5
	1.198	606.5	611	608.5
	1.199	609	610	610
	1.2	606.5	611	609
	1.201	612	606.5	609.5
	1.202	611.5	606.5	608.5
	1.203	606.5	609.5	609.5
	1.204	609	610.5	612.5
	1.205	609.5	610.5	610
	1.206	606.5	606.5	608.5
	1.207	606.5	611	610
	1.208	611	608.5	608
	1.209	608.5	608.5	612
	1.21	608.5	610	613.5
	1.211	610	608.5	612.5
	1.212	609.5	610	613
	1.213	608	606.5	611.5
	1.214	606.5	606.5	615
	1.215	610	609	610
	1.216	606.5	606.5	614
	1.217	608.5	606.5	615
	1.218	608.5	608.5	612
	1.219	606.5	609.5	614
	1.22	610.5	608.5	613.5
	1.221	608.5	606	614
	1.222	608.5	605.5	615.5
	1.223	609.5	608	616
	1.224	614	606.5	617.5
	1.225	608.5	608.5	618
	1.226	608.5	606.5	615
	1.227	609.5	608.5	618
	1.228	610.5	606.5	617.5
	1.229	609.5	606.5	618.5
	1.23	608.5	609.5	616.5
	1.231	611	606.5	617
	1.232	609.5	608.5	620
	1.233	610.5	608.5	618.5
	1.234	612.5	606.5	621.5
	1.235	611.5	606.5	618
	1.236	613	609	619.5
	1.237	610.5	610.5	618.5
	1.238	614	609.5	619.5
	1.239	613.5	609.5	619
	1.24	613.5	614	618
	1.241	613	608.5	618
	1.242	608.5	612.5	620.5
	1.243	610.5	611	619
	1.244	613.5	613	618
	1.245	613	613.5	617
	1.246	613	612	619
	1.247	617.5	610	619.5
	1.248	613	613	616
	1.249	612.5	614	620
	1.25	617.5	611.5	616
	1.251	612	612.5	617
	1.252	613.5	615.5	615.5
	1.253	613.5	612.5	616
	1.254	613	612	614
	1.255	614.5	613	618.5
	1.256	613.5	614	614
	1.257	613	611	612.5
	1.258	609.5	611.5	615.5
	1.259	613.5	613.5	614
	1.26	610.5	612	611.5
	1.261	611	609	612
	1.262	614.5	616	612
	1.263	613	616.5	615.5
	1.264	613	613.5	611.5
	1.265	614	617	609.5
	1.266	615.5	617.5	613
	1.267	613	617.5	610
	1.268	612	610.5	610.5
	1.269	612	614	612.5
	1.27	612	614	608.5
	1.271	615	615	606.5
	1.272	609	619.5	608.5
	1.273	612.5	615.5	611
	1.274	611.5	617.5	604.5
	1.275	613	617.5	605.5
	1.276	615.5	610	605
	1.277	609.5	613.5	606
	1.278	615.5	615	610.5
	1.279	614	616	604
	1.28	612	615	603.5
	1.281	613	614	600.5
	1.282	614	615.5	603.5
	1.283	613	618.5	603.5
	1.284	609.5	614.5	603
	1.285	610	617.5	606.5
	1.286	610.5	612.5	601.5
	1.287	611	617.5	604
	1.288	610	615.5	604.5
	1.289	610	615.5	603
	1.29	610.5	617	601.5
	1.291	611.5	615.5	601.5
	1.292	609	616.5	603
	1.293	608.5	615.5	601.5
	1.294	612	617	605
	1.295	611	614	602.5
	1.296	610	616	601.5
	1.297	606.5	615	603
	1.298	609	617.5	600
	1.299	610	616	601
	1.3	611.5	615.5	601.5
	1.301	613.5	615.5	601
	1.302	610.5	613.5	604.5
	1.303	611	616	601.5
	1.304	613.5	615	606.5
	1.305	609.5	611.5	606.5
	1.306	609.5	614	608.5
	1.307	609	614.5	606.5
	1.308	606.5	613	606
	1.309	610.5	613.5	610
	1.31	610.5	615.5	606.5
	1.311	608.5	613.5	611
	1.312	612	615.5	606.5
	1.313	609.5	612	610.5
	1.314	614	612	610.5
	1.315	610	615.5	612.5
	1.316	611	612.5	614
	1.317	614.5	614.5	612.5
	1.318	614	612.5	615
	1.319	613.5	611.5	615.5
	1.32	615	611	614.5
	1.321	610.5	610	616
	1.322	613.5	613	618
	1.323	615	612.5	615.5
	1.324	609.5	612.5	615.5
	1.325	611.5	612.5	615.5
	1.326	610.5	610.5	614.5
	1.327	615	610.5	617.5
	1.328	612	612	620
	1.329	612	614.5	618
	1.33	613.5	613	619
	1.331	610	614.5	618.5
	1.332	616	610	617.5
	1.333	613	610.5	620
	1.334	614.5	612.5	621
	1.335	614	610.5	621
	1.336	611.5	611	624
	1.337	612	612	622
	1.338	615.5	607.5	618
	1.339	615.5	611.5	623.5
	1.34	611.5	613.5	623
	1.341	617	610	621
	1.342	615.5	611	620
	1.343	613.5	611.5	620.5
	1.344	613	610	621
	1.345	615.5	611	619.5
	1.346	618	614	622.5
	1.347	616.5	610.5	621
	1.348	619	614	620.5
	1.349	616	612	622
	1.35	617.5	612.5	622
	1.351	616	609.5	622
	1.352	619	613	621.5
	1.353	616.5	611.5	621
	1.354	618	615.5	620.5
	1.355	619	611	622
	1.356	614.5	615	622
	1.357	616	616	619.5
	1.358	619	616	622
	1.359	617.5	615	618
	1.36	619	611.5	622
	1.361	617	616.5	620.5
	1.362	618.5	613	620.5
	1.363	615	615.5	617.5
	1.364	617	616.5	617.5
	1.365	617	618	621.5
	1.366	615.5	613.5	617
	1.367	616.5	614.5	616.5
	1.368	615.5	616.5	615.5
	1.369	616.5	617.5	617.5
	1.37	616.5	612	614.5
	1.371	614.5	617	614
	1.372	621	615.5	616
	1.373	618	616	614.5
	1.374	617.5	616	615.5
	1.375	617	615.5	612
	1.376	613.5	614	611.5
	1.377	615.5	617	611
	1.378	616	615.5	613
	1.379	616.5	613	613.5
	1.38	619	614	614
	1.381	614	617.5	610
	1.382	615.5	615.5	606.5
	1.383	616	616.5	608.5
	1.384	615	618	608.5
	1.385	613.5	615.5	610.5
	1.386	613.5	617.5	606
	1.387	614.5	617.5	610
	1.388	612.5	615.5	609
	1.389	611	615.5	610.5
	1.39	611.5	615.5	609
	1.391	611	616	611
	1.392	609	617	609.5
	1.393	608.5	618	608.5
	1.394	613.5	616.5	609.5
	1.395	611	615.5	608.5
	1.396	613	614	610
	1.397	609	615.5	609.5
	1.398	608.5	613.5	609.5
	1.399	609.5	614	610
	1.4	609.5	612.5	606.5
	1.401	611	610.5	608.5
	1.402	606.5	615.5	608.5
	1.403	606.5	608.5	612
	1.404	608.5	610.5	613.5
	1.405	606.5	608	611
	1.406	606.5	610	609
	1.407	605.5	613	612
	1.408	609	610	612
	1.409	605.5	608.5	612
	1.41	605.5	609	611
	1.411	604.5	611.5	616
	1.412	606.5	609	616.5
	1.413	606.5	609	615.5
	1.414	604.5	606.5	613
	1.415	606	609.5	617.5
	1.416	608.5	606.5	613.5
	1.417	605.5	610	620
	1.418	606.5	606.5	619
	1.419	606.5	606.5	614.5
	1.42	605.5	610	616
	1.421	606.5	604.5	617
	1.422	606.5	606	618
	1.423	606.5	606.5	616.5
	1.424	606.5	606.5	623
	1.425	604	604	621
	1.426	602.5	605.5	619.5
	1.427	604.5	606.5	621.5
	1.428	606.5	602	622
	1.429	609	604	622.5
	1.43	606.5	604.5	623
	1.431	606.5	603.5	620.5
	1.432	608.5	603	621.5
	1.433	605	601.5	619
	1.434	606	606	618.5
	1.435	610	601.5	620.5
	1.436	606.5	603	622
	1.437	608.5	605	621
	1.438	608.5	602	618.5
	1.439	609.5	604.5	622.5
	1.44	606.5	604	616.5
	1.441	606.5	600.5	617
	1.442	609	600.5	618
	1.443	606.5	602.5	619.5
	1.444	608.5	603	616.5
	1.445	606.5	604.5	618.5
	1.446	609	603.5	617.5
	1.447	612	604.5	618.5
	1.448	609.5	599	620
	1.449	611.5	601.5	616.5
	1.45	611.5	604.5	615.5
	1.451	611	604.5	617
	1.452	609.5	602.5	615.5
	1.453	612	606.5	617
	1.454	610.5	605	613.5
	1.455	612.5	610	612
	1.456	615.5	604.5	614.5
	1.457	613.5	608.5	615.5
	1.458	612	608	614
	1.459	612	606.5	615
	1.46	614	609	611
	1.461	612	611.5	610.5
	1.462	615.5	609	610
	1.463	615	609	613
	1.464	616.5	606.5	608.5
	1.465	618	606.5	610
	1.466	613	606.5	606.5
	1.467	615.5	609.5	606.5
	1.468	615.5	609	606.5
	1.469	616	610	606.5
	1.47	619.5	611	608.5
	1.471	619.5	608.5	604.5
	1.472	618.5	609	606.5
	1.473	615	610	606.5
	1.474	619	610	606.5
	1.475	617.5	611.5	604.5
	1.476	616.5	608.5	603.5
	1.477	616.5	608.5	602.5
	1.478	620.5	610	604
	1.479	615.5	609	606.5
	1.48	621	606.5	603
	1.481	618	606.5	601
	1.482	617.5	606.5	605.5
	1.483	619.5	610	603.5
	1.484	617.5	611.5	602.5
	1.485	617.5	609	602.5
	1.486	616	606.5	602.5
	1.487	620	608.5	600
	1.488	619	608.5	604.5
	1.489	616	608	606.5
	1.49	615	608.5	605
	1.491	617.5	607.5	603
	1.492	620	605.5	606
	1.493	618.5	606.5	601.5
	1.494	621.5	604.5	608.5
	1.495	619	609.5	606.5
	1.496	619	606	605
	1.497	620	606.5	608.5
	1.498	621	606.5	604
	1.499	620	606.5	602.5
	1.5	621.5	608.5	606.5
	1.501	621	605	606
	1.502	619.5	601.5	609.5
	1.503	619	606.5	606.5
	1.504	621	604.5	612
	1.505	619.5	606.5	608
	1.506	621	606.5	609.5
	1.507	623	603.5	608.5
	1.508	621.5	606	606.5
	1.509	624	602	610.5
	1.51	619	604.5	606.5
	1.511	623	604.5	612
	1.512	621.5	603	606.5
	1.513	628	606	609
	1.514	623	601.5	611
	1.515	624	603.5	611
	1.516	621.5	605	606.5
	1.517	621.5	605.5	609
	1.518	626	605.5	608
	1.519	620	606.5	610
	1.52	623	604	612.5
	1.521	628	604.5	610
	1.522	624	603.5	612.5
	1.523	624	605	612.5
	1.524	626.5	606.5	610
	1.525	622.5	606	612
	1.526	624.5	604	611
	1.527	625	605.5	611
	1.528	629.5	605	613
	1.529	629.5	608.5	612
	1.53	628	608	611.5
	1.531	628	610	613.5
	1.532	627	606.5	611.5
	1.533	627	606.5	610.5
	1.534	627.5	606.5	611
	1.535	629	604	606.5
	1.536	628.5	606.5	608
	1.537	629.5	610.5	606.5
	1.538	629.5	608.5	608.5
	1.539	631	609.5	611
	1.54	630	608.5	606.5
	1.541	630.5	608.5	609
	1.542	630.5	609.5	605.5
	1.543	629.5	610	610
	1.544	628	613.5	609
	1.545	631.5	612	609
	1.546	632.5	615.5	602.5
	1.547	630	612	605
	1.548	630	614	606.5
	1.549	633.5	613.5	604
	1.55	629.5	611.5	604
	1.551	633.5	610.5	604.5
	1.552	629.5	615.5	608.5
	1.553	633	617.5	602.5
	1.554	632.5	616.5	603.5
	1.555	632	618.5	603
	1.556	632.5	617	605.5
	1.557	634.5	616	604
	1.558	637	613	604
	1.559	635.5	614	606
	1.56	638	616	605.5
	1.561	633	618.5	605
	1.562	635.5	618.5	602.5
	1.563	635.5	620.5	601.5
	1.564	634.5	622	606.5
	1.565	636	620	603.5
	1.566	634.5	621.5	606.5
	1.567	636	619	605.5
	1.568	635.5	619	608
	1.569	636	620	604.5
	1.57	636	616.5	606.5
	1.571	639	617.5	606.5
	1.572	636	620.5	609
	1.573	637	621.5	605
	1.574	634	621	606.5
	1.575	636	619	608.5
	1.576	639	619.5	606.5
	1.577	634.5	617.5	609
	1.578	638	619	606.5
	1.579	637.5	621	605.5
	1.58	637	619.5	612
	1.581	634	621.5	609.5
	1.582	636	618.5	610.5
	1.583	640.5	618.5	612
	1.584	634	618.5	613
	1.585	638	620	609
	1.586	635.5	617.5	612
	1.587	636	616.5	614
	1.588	636	617.5	614
	1.589	634	617	615
	1.59	634.5	620.5	615.5
	1.591	634.5	618.5	614
	1.592	634	617	616.5
	1.593	639.5	616.5	613
	1.594	632	617.5	617.5
	1.595	634.5	617	617
	1.596	632	619.5	620.5
	1.597	636	614.5	619
	1.598	632	615	619
	1.599	633	617.5	622
	1.6	631	614	621
	1.601	631.5	619.5	618
	1.602	629	615	615.5
	1.603	628.5	614	621.5
	1.604	626.5	616.5	619.5
	1.605	629	617	621
	1.606	628	614.5	617
	1.607	625	619.5	621.5
	1.608	627	616	620
	1.609	626	611.5	620.5
	1.61	622.5	613.5	619
	1.611	624.5	617	621.5
	1.612	623.5	613	616
	1.613	621.5	613.5	619.5
	1.614	624	613	617.5
	1.615	622.5	612.5	621.5
	1.616	621	612	621.5
	1.617	620.5	613	621
	1.618	623	613	622.5
	1.619	622.5	616.5	620.5
	1.62	619	613	621.5
	1.621	616.5	615.5	620.5
	1.622	617.5	614	619.5
	1.623	618.5	616	620
	1.624	619	618.5	620
	1.625	620.5	615.5	618.5
	1.626	621.5	612	618
	1.627	617	613	616.5
	1.628	616.5	617	619.5
	1.629	612.5	613.5	621
	1.63	614.5	611.5	620
	1.631	615.5	613.5	620
	1.632	613	614.5	620
	1.633	612.5	615	619.5
	1.634	615.5	615.5	617.5
	1.635	615.5	613	618.5
	1.636	611.5	613	619
	1.637	611	616.5	621.5
	1.638	613.5	611	622
	1.639	610	613.5	617
	1.64	612	611	621.5
	1.641	615.5	614	617.5
	1.642	612	619	617.5
	1.643	611.5	613	621.5
	1.644	613	614.5	620
	1.645	616.5	613.5	619.5
	1.646	613.5	613	618.5
	1.647	612	614.5	617.5
	1.648	610.5	612	618.5
	1.649	616	611	619.5
	1.65	611.5	609.5	615.5
	1.651	612	612.5	617
	1.652	613.5	612	614.5
	1.653	611.5	612.5	615.5
	1.654	612	609.5	617.5
	1.655	611	608.5	616
	1.656	614	613.5	618.5
	1.657	612	613	619
	1.658	609.5	613.5	618
	1.659	606.5	612.5	616.5
	1.66	608.5	612	621
	1.661	609	615	620.5
	1.662	606.5	612.5	622.5
	1.663	608	615	621
	1.664	609.5	612	623.5
	1.665	608.5	615.5	620.5
	1.666	606.5	613	617
	1.667	605.5	614.5	620
	1.668	606.5	612.5	623
	1.669	608.5	615.5	620.5
	1.67	602.5	615.5	620
	1.671	602.5	613	625.5
	1.672	605	612.5	620
	1.673	602	613.5	622.5
	1.674	601	617.5	623.5
	1.675	600	615.5	626
	1.676	600	613.5	624
	1.677	598.5	615	626.5
	1.678	597.5	614.5	623.5
	1.679	595.5	616.5	623
	1.68	593.5	617	626
	1.681	595	614	628
	1.682	594.5	615.5	625
	1.683	594	619.5	625
	1.684	590.5	620.5	625
	1.685	588	615.5	630.5
	1.686	586	616.5	630.5
	1.687	584.5	620	627
	1.688	583.5	615.5	629
	1.689	584	615.5	629
	1.69	583.5	617.5	630.5
	1.691	576.5	617	632
	1.692	582.5	616.5	633.5
	1.693	574.5	618	630
	1.694	576	616.5	630.5
	1.695	572	617.5	636
	1.696	570.5	621	632.5
	1.697	568.5	617	633.5
	1.698	567	620	635.5
	1.699	567	616	634
	1.7	564	620.5	631
	1.701	559	614	632.5
	1.702	560.5	618	633.5
	1.703	557.5	617	632
	1.704	553.5	618.5	636
	1.705	554	615.5	633.5
	1.706	554	616.5	635
	1.707	554	616.5	636
	1.708	548.5	618	634.5
	1.709	546	614	636
	1.71	542.5	615.5	632.5
	1.711	540	615.5	632.5
	1.712	537.5	614	635
	1.713	540.5	612	636
	1.714	537	615.5	634.5
	1.715	534	610	634
	1.716	529	610.5	636
	1.717	531.5	611.5	636
	1.718	526.5	606.5	638.5
	1.719	525.5	608.5	633.5
	1.72	520.5	604	634.5
	1.721	520.5	606.5	639.5
	1.722	519.5	605	638.5
	1.723	517	601.5	638
	1.724	512	604.5	638
	1.725	508.5	601	640.5
	1.726	508.5	602	640
	1.727	506.5	598	638.5
	1.728	503.5	601	643.5
	1.729	499.5	599	641.5
	1.73	497	596	642.5
	1.731	493.5	595	643.5
	1.732	488	594.5	645.5
	1.733	486.5	595	647
	1.734	484.5	594	643.5
	1.735	480.5	591	647
	1.736	476.5	591	645.5
	1.737	469.5	588.5	650
	1.738	466	587.5	644.5
	1.739	459.5	587.5	646.5
	1.74	454	590	649.5
	1.741	452.5	585.5	650.5
	1.742	446	586	647.5
	1.743	444.5	583.5	647
	1.744	440.5	585	650
	1.745	433.5	584	646.5
	1.746	430.5	584	648.5
	1.747	424	581	651
	1.748	419.5	577.5	651
	1.749	417	580.5	653.5
	1.75	414	576.5	651
	1.751	408.5	576.5	656.5
	1.752	402	574.5	649.5
	1.753	400	576.5	656.5
	1.754	392	579	653.5
	1.755	387.5	575	657
	1.756	385	574.5	655
	1.757	379.5	570.5	656
	1.758	373.5	569	656.5
	1.759	368	572	656.5
	1.76	363.5	571	657
	1.761	359	569	658.5
	1.762	356.5	566.5	660
	1.763	351.5	561.5	657
	1.764	345.5	563.5	659.5
	1.765	344.5	564	661
	1.766	341.5	559	657
	1.767	334.5	559.5	660
	1.768	324	557.5	663.5
	1.769	323	554	660.5
	1.77	320.5	554	657.5
	1.771	317	553	662
	1.772	311.5	551	664
	1.773	307.5	547.5	658.5
	1.774	306	545	663.5
	1.775	298	545	663
	1.776	293	541.5	663.5
	1.777	289	539.5	664
	1.778	284.5	538	663.5
	1.779	281.5	534	666.5
	1.78	277.5	532	666.5
	1.781	274	528	666
	1.782	267.5	527	666
	1.783	265.5	527	667
	1.784	260	520	668
	1.785	259	521	669.5
	1.786	250.5	517	666
	1.787	248.5	512.5	669
	1.788	244	510.5	669
	1.789	242	503	671.5
	1.79	231	503.5	668.5
	1.791	230	502.5	666
	1.792	226.5	500.5	669
	1.793	223	495	669.5
	1.794	217.5	489.5	670
	1.795	214.5	484.5	669.5
	1.796	210.5	484.5	666
	1.797	206	483.5	665.5
	1.798	200	479	667.5
	1.799	199	479	669.5
	1.8	191.5	473.5	671.5
	1.801	189.5	467.5	672.5
	1.802	182.5	469.5	669
	1.803	183	465	667.5
	1.804	177.5	461	669
	1.805	173.5	462.5	670.5
	1.806	172	459	666
	1.807	164.5	453.5	666
	1.808	161	451	665.5
	1.809	158	449.5	669.5
	1.81	152.5	444.5	667.5
	1.811	148	438.5	665
	1.812	143.5	435.5	668.5
	1.813	146.5	433.5	662.5
	1.814	141	428.5	664.5
	1.815	136	425	663
	1.816	136	423.5	664.5
	1.817	130	419.5	663
	1.818	128.5	417	659.5
	1.819	125	408.5	660
	1.82	121	405.5	657.5
	1.821	116	404.5	656
	1.822	116	399.5	655.5
	1.823	116	392.5	654
	1.824	109	389	656
	1.825	110	386	655.5
	1.826	106.5	382	651
	1.827	105	376.5	651
	1.828	100	373.5	651
	1.829	101	369	648.5
	1.83	99.5	363.5	647.5
	1.831	99	360.5	645.5
	1.832	96.5	356.5	643
	1.833	94.5	354	645
	1.834	92	350	643
	1.835	91	344.5	638
	1.836	90	341	642.5
	1.837	91	342	636
	1.838	88.5	338	633.5
	1.839	88	335.5	631.5
	1.84	84.5	331	630.5
	1.841	84.5	331.5	630.5
	1.842	86	324.5	627
	1.843	84.5	320.5	621.5
	1.844	86	315	620.5
	1.845	82.5	314.5	621.5
	1.846	83	310	617.5
	1.847	78.5	307.5	618
	1.848	80	304	613.5
	1.849	77	300.5	615
	1.85	79	299.5	615.5
	1.851	79	297	606.5
	1.852	78.5	294	608.5
	1.853	73.5	293.5	604.5
	1.854	79	290	602
	1.855	74.5	285	599
	1.856	72.5	286	601.5
	1.857	74	280.5	600.5
	1.858	76	281.5	595
	1.859	75	276	595
	1.86	77	274.5	590
	1.861	75	273.5	588.5
	1.862	75	269	588
	1.863	75.5	270.5	587
	1.864	70.5	270.5	576
	1.865	72.5	262.5	578.5
	1.866	74	268	576.5
	1.867	71.5	261.5	574.5
	1.868	75	259	574.5
	1.869	76.5	255	570.5
	1.87	77	257	565.5
	1.871	75	253	561.5
	1.872	74	250.5	564.5
	1.873	76.5	252	557
	1.874	80	253	555.5
	1.875	80.5	250.5	552
	1.876	81.5	246.5	545
	1.877	80.5	244	547
	1.878	82.5	243.5	543
	1.879	85.5	243	537
	1.88	89.5	241	535.5
	1.881	88	239	529
	1.882	91	239	526.5
	1.883	91.5	236	524
	1.884	94	236.5	521
	1.885	97.5	235.5	519.5
	1.886	100	236	511
	1.887	101	235.5	510.5
	1.888	110.5	232.5	502
	1.889	113	230.5	502
	1.89	113	229	496.5
	1.891	118	232.5	489
	1.892	126	232.5	484.5
	1.893	126	229	481
	1.894	130	230.5	480
	1.895	136.5	232.5	472
	1.896	142.5	226	470
	1.897	147.5	229.5	460.5
	1.898	153	231	460.5
	1.899	158	230	455.5
	1.9	167.5	226	450
	1.901	175.5	224.5	442.5
	1.902	188.5	224	437.5
	1.903	198	228	430
	1.904	205	227	424
	1.905	214.5	226	417.5
	1.906	222	227.5	411.5
	1.907	232.5	226	407.5
	1.908	242	230.5	404
	1.909	253.5	231.5	396
	1.91	265	229	389
	1.911	274	230	382.5
	1.912	289	228	378
	1.913	305	230	368.5
	1.914	319	231	363.5
	1.915	338	228	355
	1.916	355.5	231.5	350.5
	1.917	369	231	343.5
	1.918	384.5	232	332.5
	1.919	397	231.5	330.5
	1.92	409.5	229.5	322
	1.921	415.5	228	318
	1.922	431	230	308
	1.923	440.5	233.5	300
	1.924	450	231	293.5
	1.925	464	233.5	287.5
	1.926	474.5	234.5	283
	1.927	479.5	234	278
	1.928	487	233.5	271.5
	1.929	491	235.5	266.5
	1.93	496.5	235.5	259
	1.931	499.5	236	254
	1.932	501	236	246
	1.933	506	236.5	243
	1.934	509.5	239	233.5
	1.935	513	240.5	227.5
	1.936	520	241	222
	1.937	527.5	241	213.5
	1.938	535	247	212.5
	1.939	540.5	246	207
	1.94	547	245	198.5
	1.941	557	248.5	195
	1.942	560	252	192.5
	1.943	566	253	186.5
	1.944	568	256	186.5
	1.945	574.5	257.5	174.5
	1.946	580	258.5	174
	1.947	584	259.5	168.5
	1.948	591	264	162.5
	1.949	591.5	265.5	159.5
	1.95	600.5	268.5	155.5
	1.951	605	267.5	147
	1.952	606.5	267	148.5
	1.953	613.5	270.5	144.5
	1.954	613.5	268	137
	1.955	614	274	138
	1.956	617	276	134.5
	1.957	622	273.5	131
	1.958	618.5	278.5	127.5
	1.959	621.5	281	122.5
	1.96	624	282	122
	1.961	628.5	280.5	115.5
	1.962	629.5	280	114.5
	1.963	632.5	284	116
	1.964	632.5	286	110.5
	1.965	638	286	109
	1.966	639.5	290.5	106
	1.967	644	289	103
	1.968	647.5	287	103.5
	1.969	647	293.5	101
	1.97	655.5	293.5	97.5
	1.971	659.5	293.5	95.5
	1.972	658.5	291.5	94
	1.973	663	293	92
	1.974	663.5	295.5	89
	1.975	673	295	86
	1.976	672	297.5	84.5
	1.977	680.5	299	86.5
	1.978	679	294.5	83
	1.979	686.5	302.5	79
	1.98	690	299.5	76.5
	1.981	697	299	77.5
	1.982	698	304	76
	1.983	704.5	300.5	75
	1.984	714.5	304	77
	1.985	717.5	308	73
	1.986	722	311	74
	1.987	725.5	308.5	69
	1.988	729	310.5	70.5
	1.989	738	317	71.5
	1.99	742	316	69
	1.991	752	323	68
	1.992	753.5	322.5	66.5
	1.993	763.5	323	66.5
[truncated: 13,006 more rows]

## Sheet: J
DataTypeVer2.0	Time	Fz	Fz	Fz
NumberOfData		15000	15000	15000
PreTriggerData		0	0	0
SamplingTime[ms]		1	1	1
DataLabel		V1:CMJ	V2:CMJ	V3:CMJ
DataUnit	sec	N	N	N
	0	734.5	723	734
	0.001	732.5	719.5	728
	0.002	733	720.5	730
	0.003	732.5	723.5	731
	0.004	732	718.5	728
	0.005	731.5	721	731.5
	0.006	733.5	719.5	731.5
	0.007	733.5	725	731
	0.008	731.5	721.5	737
	0.009	733.5	723.5	730.5
	0.01	731.5	723.5	731.5
	0.011	733.5	720	728
	0.012	734	720	731.5
	0.013	734.5	722	731
	0.014	731.5	720.5	727.5
	0.015	734	722.5	732.5
	0.016	735	720	732
	0.017	731	721	731
	0.018	731	723	732
	0.019	733.5	722	733.5
	0.02	729	723.5	732.5
	0.021	732	722.5	733
	0.022	732.5	723.5	729
	0.023	731	721.5	732.5
	0.024	728.5	720.5	730
[truncated: 14,975 more rows]
