# Supplementary material for: Effects of high-intensity sprint exercise on neuromuscular function in sprinters: the countermovement jump as a fatigue assessment tool
Source: PeerJ. 2024 May 29;12:e17443. doi: 10.7717/peerj.17443 (PMC11143976; doi:10.7717/peerj.17443)
Supplement: Supplemental Information 4 — The data for each trial for each participant (A–J). [file peerj-12-17443-s004.xlsx]

## Sheet: A
DataTypeVer2.0	Time	Fz	Fz	Fz
NumberOfData		8000	8000	8000
PreTriggerData		0	0	0
SamplingTime[ms]		1	1	1
DataLabel		J1:CMJ	J2:CMJ	J3:CMJ
DataUnit	sec	N	N	N
	0	543.5	543	544
	0.001	544.5	544	544.5
	0.002	549.5	544.5	544.5
	0.003	548.5	542	544.5
	0.004	543.5	544.5	544.5
	0.005	543.5	543	543.5
	0.006	543	543	542.5
	0.007	551	539.5	539
	0.008	546.5	540.5	544
	0.009	544	547	544
	0.01	543.5	543	540.5
	0.011	542.5	544.5	543.5
	0.012	544.5	544.5	544.5
	0.013	544.5	544	542.5
	0.014	546.5	541.5	541
	0.015	542	542.5	544
	0.016	546.5	543.5	540
	0.017	544.5	542	543
	0.018	544	544	543
	0.019	543	539.5	542.5
	0.02	541.5	541.5	543
	0.021	542.5	542	544.5
	0.022	544	542.5	546.5
	0.023	541.5	544.5	542.5
	0.024	544	543.5	544.5
	0.025	541.5	540	543.5
	0.026	543.5	543	539.5
	0.027	540	541.5	543.5
	0.028	541	542.5	547
	0.029	542	542.5	542.5
	0.03	543	544	544.5
	0.031	540	541	547
	0.032	542.5	540	541.5
	0.033	544.5	543.5	544.5
	0.034	542.5	543	542.5
	0.035	544.5	543	544.5
	0.036	542	540	544
	0.037	544.5	543.5	547
	0.038	544	542.5	544.5
	0.039	544.5	543	544.5
	0.04	544.5	540.5	544.5
	0.041	544	542.5	543
	0.042	540.5	542	547
	0.043	543	542.5	547.5
	0.044	543	541.5	544.5
	0.045	543.5	542	544.5
	0.046	544.5	540	543.5
	0.047	543	544	544.5
	0.048	544	544.5	544.5
	0.049	544	543	543.5
	0.05	546.5	543.5	547.5
	0.051	544.5	544.5	544.5
	0.052	543.5	544.5	547.5
	0.053	544.5	541	544.5
	0.054	543	543	543.5
	0.055	541.5	544	543
	0.056	544.5	544.5	547.5
	0.057	544.5	542	547
	0.058	543	543.5	546
	0.059	542.5	543.5	544.5
	0.06	541	542.5	547
	0.061	544.5	544.5	544.5
	0.062	544	540.5	544.5
	0.063	544.5	544.5	547.5
	0.064	543	543.5	544.5
	0.065	541	544	544.5
	0.066	543	544.5	547
	0.067	544.5	544.5	547
	0.068	542	543	544.5
	0.069	540.5	544.5	543
	0.07	543.5	544.5	544.5
	0.071	547.5	541	543
	0.072	547	540.5	543.5
	0.073	544.5	540.5	544.5
	0.074	543	544.5	547
	0.075	547	540.5	541.5
	0.076	548	539	547
	0.077	544.5	544.5	544.5
	0.078	544	544.5	543.5
	0.079	548	543.5	541
	0.08	544.5	542	540
	0.081	543.5	542.5	540.5
	0.082	544.5	541	542
	0.083	542.5	541.5	544.5
	0.084	547	542.5	541.5
	0.085	548.5	540	542
	0.086	544.5	544.5	544
	0.087	548	540	542.5
	0.088	544.5	541.5	541
	0.089	544	540	542.5
	0.09	544.5	540.5	541.5
	0.091	542	541.5	544.5
	0.092	542.5	541.5	541
	0.093	550	542.5	538
	0.094	544.5	541.5	538
	0.095	547	540	540.5
	0.096	550.5	546.5	538.5
	0.097	544	540	540
	0.098	547	543.5	538.5
	0.099	544.5	540	541.5
	0.1	548.5	540	543
	0.101	544.5	542.5	537.5
	0.102	544.5	539	538.5
	0.103	548	541.5	537
	0.104	549	541.5	536.5
	0.105	547	542.5	538
	0.106	543.5	544.5	541
	0.107	544.5	542.5	538
	0.108	547	544.5	536.5
	0.109	544	540.5	536
	0.11	544.5	543.5	535
	0.111	547	543.5	537
	0.112	547	544	537
	0.113	547	542.5	538.5
	0.114	548	544.5	538.5
	0.115	547	547	538.5
	0.116	547.5	544.5	536.5
	0.117	544.5	546.5	536.5
	0.118	549.5	541.5	536
	0.119	546.5	542.5	540
	0.12	543	542.5	540
	0.121	547	540.5	539
	0.122	544.5	544.5	538
	0.123	544.5	544	539.5
	0.124	544.5	548	540
	0.125	544.5	544.5	539.5
	0.126	547.5	544.5	537
	0.127	543	542.5	538
	0.128	544.5	541.5	539.5
	0.129	544	547	539.5
	0.13	547	547	540
	0.131	544.5	544.5	540
	0.132	544.5	544.5	541
	0.133	541.5	544	539.5
	0.134	542.5	544.5	540
	0.135	546.5	543	541
	0.136	543.5	543.5	542.5
	0.137	544.5	544.5	538.5
	0.138	547.5	546.5	543
	0.139	547	543.5	541.5
	0.14	549.5	544.5	541.5
	0.141	544.5	544.5	542
	0.142	543.5	544.5	539.5
	0.143	543.5	547	540
	0.144	544.5	547	544.5
	0.145	544.5	544.5	543
	0.146	544	547	544.5
	0.147	544.5	547	544.5
	0.148	544.5	544.5	544.5
	0.149	544.5	548	544
	0.15	549	544.5	544.5
	0.151	544.5	542.5	544.5
	0.152	544	544.5	548
	0.153	544	542	542
	0.154	544.5	547	544.5
	0.155	543	547.5	544.5
	0.156	544.5	544.5	544.5
	0.157	546	544.5	542.5
	0.158	547	542.5	546.5
	0.159	544.5	549	541.5
	0.16	548	544.5	544.5
	0.161	549	543.5	544.5
	0.162	544.5	544.5	544.5
	0.163	547	542	542.5
	0.164	548.5	543	541.5
	0.165	548	544.5	544.5
	0.166	547	546.5	543
	0.167	544.5	544.5	548.5
	0.168	547.5	544.5	542.5
	0.169	542.5	543	549.5
	0.17	544.5	541.5	546.5
	0.171	548.5	544	543.5
	0.172	548	543	547
	0.173	549.5	543	546.5
	0.174	547.5	544	542
	0.175	544.5	542	542.5
	0.176	546.5	543	544.5
	0.177	547	542.5	543.5
	0.178	549	544.5	544.5
	0.179	547	544	544.5
	0.18	549	544.5	544.5
	0.181	547.5	540	543
	0.182	549.5	543	544.5
	0.183	549.5	540.5	544
	0.184	549.5	541.5	544.5
	0.185	546.5	541.5	542.5
	0.186	544.5	541	544.5
	0.187	547.5	541.5	547
	0.188	548.5	539	544.5
	0.189	549	544.5	547
	0.19	544.5	543.5	542
	0.191	547.5	541	541.5
	0.192	547.5	541.5	542
	0.193	547	542.5	547
	0.194	544.5	539.5	543.5
	0.195	548	542.5	544.5
	0.196	547.5	544.5	547
	0.197	547	540.5	544.5
	0.198	544.5	541	544.5
	0.199	548	541.5	540
	0.2	549.5	542.5	541.5
	0.201	547.5	542	542
	0.202	549.5	540	540.5
	0.203	547.5	539	544.5
	0.204	547	540.5	540.5
	0.205	547	542	543.5
	0.206	548.5	539	540.5
	0.207	547.5	539.5	539.5
	0.208	547.5	538.5	540.5
	0.209	548	540	540
	0.21	550	540	541.5
	0.211	550.5	544	544
	0.212	544.5	541	540.5
	0.213	544.5	542.5	541.5
	0.214	547.5	542.5	540.5
	0.215	547	541	540
	0.216	547	542	540.5
	0.217	546	538.5	544.5
	0.218	549.5	542	542.5
	0.219	547	540.5	541
	0.22	547	544	539.5
	0.221	548	544.5	541.5
	0.222	549	542.5	543.5
	0.223	548	541	541.5
	0.224	544.5	539.5	539.5
	0.225	547.5	542	543.5
	0.226	543.5	542	544.5
	0.227	544.5	544.5	544.5
	0.228	546.5	542.5	540.5
	0.229	544.5	540	547.5
	0.23	547	544.5	543
	0.231	544.5	544	542
	0.232	548.5	544.5	544.5
	0.233	544.5	544	543
	0.234	543.5	544.5	542
	0.235	549	542.5	543
	0.236	544.5	543	541.5
	0.237	547.5	543.5	544.5
	0.238	543.5	542.5	542.5
	0.239	546.5	543	542
	0.24	547.5	544.5	547.5
	0.241	547.5	543	543.5
	0.242	548	543.5	541
	0.243	547.5	541	544.5
	0.244	544	544.5	547
	0.245	544.5	542.5	540
	0.246	546.5	544.5	543
	0.247	544.5	548	544.5
	0.248	551.5	542.5	544
	0.249	544.5	547.5	543
	0.25	544.5	544	544.5
	0.251	549	544.5	544.5
	0.252	548	544.5	544.5
	0.253	547.5	544.5	541
	0.254	544.5	544.5	544.5
	0.255	546.5	548	539.5
	0.256	548.5	546.5	544
	0.257	549.5	544.5	542.5
	0.258	544.5	544.5	543
	0.259	546.5	547.5	544.5
	0.26	547.5	544.5	540.5
	0.261	547	544.5	541.5
	0.262	544.5	547.5	547
	0.263	544.5	544.5	540.5
	0.264	548	544.5	547
	0.265	550.5	547	544.5
	0.266	551	543	544.5
	0.267	548	544.5	544.5
	0.268	547	548.5	544.5
	0.269	544.5	544.5	543.5
	0.27	549	544.5	538
	0.271	547	544.5	543.5
	0.272	544.5	542.5	543
	0.273	547	544.5	541.5
	0.274	547.5	543	541.5
	0.275	544.5	541.5	540.5
	0.276	547	543.5	540
	0.277	547	547	540
	0.278	544.5	547	543
	0.279	544	544	540
	0.28	544.5	541	539
	0.281	550	543.5	540.5
	0.282	544.5	542	542.5
	0.283	547	542	540.5
	0.284	547	540	540.5
	0.285	549	539.5	540
	0.286	547.5	540	537.5
	0.287	547	544.5	539
	0.288	547.5	543	543.5
	0.289	544.5	542.5	539.5
	0.29	544.5	541.5	540
	0.291	547	544.5	540
	0.292	547.5	540.5	539
	0.293	543	542.5	540.5
	0.294	547.5	540	540
	0.295	547	539.5	536
	0.296	544.5	540	539
	0.297	547.5	538.5	533.5
	0.298	544	540.5	539.5
	0.299	544.5	539	540
	0.3	546.5	542	539
	0.301	541.5	540	533.5
	0.302	543.5	541.5	538
	0.303	544.5	542	541.5
	0.304	544.5	540	538.5
	0.305	543.5	541	538.5
	0.306	544.5	539	540.5
	0.307	542.5	540	534.5
	0.308	547	537.5	538.5
	0.309	544.5	544	535.5
	0.31	544.5	539.5	539
	0.311	549	537	540
	0.312	544.5	540	538
	0.313	544.5	537	538.5
	0.314	544.5	540	538.5
	0.315	544.5	540	539.5
	0.316	542.5	540	540
	0.317	544.5	540.5	539.5
	0.318	544.5	544	542.5
	0.319	546.5	542	541
	0.32	544.5	538.5	539.5
	0.321	542.5	537.5	541
	0.322	544.5	540.5	539
	0.323	541.5	542	544.5
	0.324	544	538	539
	0.325	541	539.5	540.5
	0.326	543.5	544.5	541.5
	0.327	544.5	540	540.5
	0.328	544.5	540.5	542
	0.329	542	542.5	541.5
	0.33	541	539.5	539.5
	0.331	542	541.5	542
	0.332	541	542.5	541.5
	0.333	541.5	540.5	540
	0.334	540	540	544.5
	0.335	540.5	541.5	540.5
	0.336	540	540.5	544.5
	0.337	541.5	542	544.5
	0.338	542.5	543	544.5
	0.339	539	541.5	540
	0.34	540	542	544.5
	0.341	544.5	542	543.5
	0.342	541	543.5	544.5
	0.343	540	540.5	544
	0.344	538.5	541.5	543.5
	0.345	542	543.5	543.5
	0.346	541.5	542	541
	0.347	541.5	541.5	542.5
	0.348	543	541.5	544.5
	0.349	539.5	541	544.5
	0.35	543	540	548
	0.351	539.5	544	548.5
	0.352	540.5	544.5	547.5
	0.353	539.5	543	544.5
	0.354	544.5	543	543.5
	0.355	542.5	544	544.5
	0.356	542	542.5	544.5
	0.357	541	540	544.5
	0.358	542.5	540	544.5
	0.359	541	541.5	544
	0.36	544.5	543	544.5
	0.361	542	544.5	543
	0.362	543.5	544	544.5
	0.363	542	544	544
	0.364	541.5	543	544.5
	0.365	543	541	539
	0.366	544.5	542	544.5
	0.367	542	543	547
	0.368	547	541.5	541.5
	0.369	544.5	544	543.5
	0.37	543	543	544.5
	0.371	539.5	539	542.5
	0.372	544.5	542	544
	0.373	544.5	544.5	540.5
	0.374	544.5	544.5	541
	0.375	543	540	544.5
	0.376	543.5	537	542
	0.377	547	539	540
	0.378	547.5	540	539.5
	0.379	547	540	541
	0.38	544.5	544	540
	0.381	547	540	544.5
	0.382	547	543	540.5
	0.383	547.5	542	541.5
	0.384	544.5	542.5	540
	0.385	544.5	542	544
	0.386	547.5	540.5	542.5
	0.387	543.5	536.5	544.5
	0.388	544.5	541.5	544.5
	0.389	549	544.5	541
	0.39	547	540	540
	0.391	548.5	540	540
	0.392	552	540.5	540.5
	0.393	547	544.5	541.5
	0.394	548	542	538
	0.395	547	541	543
	0.396	549.5	540	542
	0.397	544.5	539.5	543.5
	0.398	543.5	538	540.5
	0.399	544.5	538	543.5
	0.4	546.5	542	541.5
	0.401	544.5	540.5	542
	0.402	547	539.5	543.5
	0.403	547	539.5	541.5
	0.404	547.5	541	543.5
	0.405	551	541.5	537.5
	0.406	547.5	538.5	540.5
	0.407	547	541.5	542.5
	0.408	551	540.5	542
	0.409	547	540.5	542.5
	0.41	546.5	541.5	547
	0.411	551	543	544.5
	0.412	547	542.5	544.5
	0.413	550	539.5	539.5
	0.414	550	541	541
	0.415	549	542.5	543.5
	0.416	551.5	543	543.5
	0.417	547	543.5	540
	0.418	552.5	540.5	542.5
	0.419	547	547	544
	0.42	548	544.5	541.5
	0.421	547	543.5	542.5
	0.422	546.5	541	544
	0.423	553	543.5	544
	0.424	548	542	543.5
	0.425	548	540.5	544.5
	0.426	546.5	544.5	547
	0.427	551	544.5	549.5
	0.428	547.5	543.5	544.5
	0.429	551	543.5	544.5
	0.43	551	543.5	544.5
	0.431	547	540	544.5
	0.432	552	542	541.5
	0.433	548	544.5	543
	0.434	550.5	542	544
	0.435	547	543	544.5
	0.436	547.5	544.5	544.5
	0.437	547	544.5	544.5
	0.438	548.5	547	544.5
	0.439	551.5	544.5	541.5
	0.44	544.5	543.5	544.5
	0.441	547	543.5	543.5
	0.442	548.5	542	544.5
	0.443	544.5	543.5	543
	0.444	549	544.5	541.5
	0.445	549.5	547	542.5
	0.446	544.5	543	541.5
	0.447	548.5	544.5	542.5
	0.448	551.5	548	541
	0.449	548.5	544.5	542
	0.45	547	544.5	539.5
	0.451	546.5	544	542
	0.452	544.5	544.5	544
	0.453	548	540	543.5
	0.454	549	541	541.5
	0.455	548	547	539
	0.456	547	543.5	542.5
	0.457	543.5	542.5	540.5
	0.458	551	544	541.5
	0.459	544.5	544	542
	0.46	546.5	546.5	541
	0.461	544.5	544.5	540
	0.462	547.5	543.5	537
	0.463	544.5	544.5	541
	0.464	547	544.5	539.5
	0.465	544.5	544.5	540.5
	0.466	544.5	544.5	542
	0.467	547	541.5	539
	0.468	547	543.5	539
	0.469	547	544.5	541
	0.47	541	543.5	540
	0.471	547	540.5	539.5
	0.472	548	544.5	538
	0.473	544	544.5	542.5
	0.474	548	543.5	538
	0.475	547	543.5	540.5
	0.476	544.5	544.5	540.5
	0.477	544.5	543	536
	0.478	544.5	543.5	541
	0.479	547	543	540
	0.48	548	541	540
	0.481	544	544.5	538.5
	0.482	547.5	542.5	542
	0.483	547	543	539.5
	0.484	544.5	541.5	541.5
	0.485	543.5	543.5	541
	0.486	543.5	541.5	540.5
	0.487	544.5	539.5	537
	0.488	544.5	543	538
	0.489	544.5	542.5	541.5
	0.49	543	540.5	538
	0.491	549.5	540.5	539
	0.492	548	542.5	539
	0.493	544.5	540	541
	0.494	546.5	541	542
	0.495	548	542.5	538
	0.496	544.5	544.5	542
	0.497	544.5	540	541
	0.498	544.5	544	542.5
	0.499	543.5	540.5	543
	0.5	541	540.5	540.5
	0.501	544.5	544.5	544.5
	0.502	544.5	539.5	544.5
	0.503	547	541	544.5
	0.504	544.5	540	544.5
	0.505	543.5	540	544.5
	0.506	540	541.5	544.5
	0.507	544.5	544	542.5
	0.508	548.5	544	539.5
	0.509	543.5	540	540.5
	0.51	541	541.5	541
	0.511	543.5	537	541
	0.512	544.5	541.5	543
	0.513	546.5	543	540.5
	0.514	542.5	541.5	540
	0.515	544.5	544.5	544.5
	0.516	544.5	538	543.5
	0.517	542.5	540.5	546.5
	0.518	547	540	541
	0.519	543	544.5	541.5
	0.52	540.5	539.5	544.5
	0.521	540	541.5	541
	0.522	544.5	540	544.5
	0.523	544.5	538.5	544.5
	0.524	544.5	537	540
	0.525	543	537.5	544
	0.526	541	537.5	544.5
	0.527	541.5	538	542.5
	0.528	544.5	540.5	542
	0.529	540	539.5	541.5
	0.53	544.5	540	547
	0.531	542.5	535	543.5
	0.532	542	538	542
	0.533	547	542.5	542
	0.534	541.5	540.5	547
	0.535	542	540.5	542.5
	0.536	542.5	539.5	542.5
	0.537	542	539.5	544
	0.538	542.5	537	541.5
	0.539	542	539	544.5
	0.54	541	538.5	543
	0.541	540	538.5	543.5
	0.542	541.5	541	543
	0.543	543.5	541.5	544.5
	0.544	544.5	540	544
	0.545	543.5	541.5	543.5
	0.546	542	541	544
	0.547	541.5	539.5	542
	0.548	540	539.5	544.5
	0.549	541.5	542.5	544.5
	0.55	541	542.5	544.5
	0.551	540.5	544.5	542.5
	0.552	538	544.5	541.5
	0.553	541	538.5	538.5
	0.554	540.5	544.5	543
	0.555	542.5	542	542.5
	0.556	538.5	542	544.5
	0.557	544.5	540.5	541
	0.558	541.5	544.5	542.5
	0.559	539.5	542.5	541
	0.56	542	543	544.5
	0.561	540.5	540.5	541.5
	0.562	542	542.5	541.5
	0.563	541.5	543.5	543
	0.564	540	544	540.5
	0.565	539	542.5	542.5
	0.566	542	544.5	543
	0.567	538.5	542.5	544
	0.568	542.5	543.5	544
	0.569	541.5	544.5	543
	0.57	544.5	541	540.5
	0.571	544.5	543.5	544.5
	0.572	543	544.5	543.5
	0.573	540	544.5	543.5
	0.574	542.5	544.5	544.5
	0.575	544.5	544.5	547
	0.576	540	543.5	548
	0.577	543.5	542	544.5
	0.578	541.5	539.5	540.5
	0.579	542.5	546.5	544.5
	0.58	543	544.5	544.5
	0.581	546.5	544.5	544.5
	0.582	544	543	544.5
	0.583	542.5	543	547
	0.584	546.5	544	544.5
	0.585	544.5	544.5	547.5
	0.586	544.5	541	546.5
	0.587	544.5	546.5	544.5
	0.588	544.5	544.5	544.5
	0.589	543.5	542.5	547
	0.59	543	546	543.5
	0.591	544.5	544.5	543.5
	0.592	547	542.5	544.5
	0.593	549.5	544.5	544.5
	0.594	544.5	547	547
	0.595	544.5	544.5	547
	0.596	547	543.5	544.5
	0.597	544.5	542	547
	0.598	544.5	544	547
	0.599	543.5	544.5	544.5
	0.6	544.5	547	548
	0.601	548	544.5	544.5
	0.602	544.5	544	549.5
	0.603	544.5	544.5	544.5
	0.604	543.5	544.5	546.5
	0.605	547.5	542.5	544.5
	0.606	542.5	543.5	549.5
	0.607	544.5	544	547
	0.608	547	544.5	547
	0.609	544	544.5	547
	0.61	547.5	543	546.5
	0.611	547	544.5	544
	0.612	544.5	547.5	543
	0.613	544	545.5	544
	0.614	548	542	549.5
	0.615	547	544.5	544.5
	0.616	548	543	544.5
	0.617	546.5	542	547
	0.618	546.5	542	542.5
	0.619	547	544.5	546.5
	0.62	547.5	547.5	544.5
	0.621	544.5	542	543.5
	0.622	544.5	544.5	544.5
	0.623	548	544.5	544.5
	0.624	546	544.5	547
	0.625	547	544	542
	0.626	546.5	543	541
	0.627	546	541.5	543.5
	0.628	546.5	544.5	544.5
	0.629	548	544.5	544.5
	0.63	548	543	543.5
	0.631	547.5	542.5	544.5
	0.632	547	540.5	544.5
	0.633	544.5	544.5	544
	0.634	544	540	543.5
	0.635	549	543.5	543.5
	0.636	547.5	544.5	541
	0.637	550	540	543.5
	0.638	544.5	544.5	540.5
	0.639	544.5	544.5	546.5
	0.64	551.5	544.5	544.5
	0.641	544.5	548.5	542
	0.642	544.5	544.5	544.5
	0.643	548	547	540.5
	0.644	549.5	544.5	539.5
	0.645	544.5	542.5	543
	0.646	550	541	544
	0.647	547.5	544.5	542
	0.648	550.5	542.5	543.5
	0.649	551	538.5	543
	0.65	549	544.5	543.5
	0.651	547.5	543	543
	0.652	548.5	541	544.5
	0.653	552	541	541
	0.654	550	540	540.5
	0.655	544.5	543	544.5
	0.656	547	538.5	544
	0.657	544.5	541.5	544
	0.658	547	542	541.5
	0.659	544.5	543	541
	0.66	547.5	543	544.5
	0.661	547	543.5	543
	0.662	549	544.5	540.5
	0.663	548	544.5	544.5
	0.664	549.5	543.5	544
	0.665	547.5	540	540
	0.666	550	538.5	542
	0.667	544.5	544.5	542.5
	0.668	547.5	542.5	541.5
	0.669	549.5	541	541.5
	0.67	549	544	542.5
	0.671	547	543	542.5
	0.672	549	544	542.5
	0.673	547	541	543
	0.674	549.5	546.5	541
	0.675	546.5	541	544.5
	0.676	544.5	544.5	540
	0.677	547	543.5	542
	0.678	547	544.5	541.5
	0.679	543.5	544.5	542.5
	0.68	544.5	543.5	542.5
	0.681	542.5	544.5	543
	0.682	548	541.5	544.5
	0.683	548	544.5	542.5
	0.684	544	542.5	540
	0.685	544.5	544	539
	0.686	548	540	538.5
	0.687	544	541	540
	0.688	547.5	544.5	542
	0.689	547	540.5	542
	0.69	544.5	543	541
	0.691	549	541.5	540
	0.692	544	542	541
	0.693	544.5	541.5	540.5
	0.694	547	541	537
	0.695	544.5	540.5	540
	0.696	544.5	540	542.5
	0.697	547	544.5	540
	0.698	547.5	543.5	539
	0.699	546.5	543.5	541
	0.7	549.5	541	539.5
	0.701	548	543.5	536.5
	0.702	547	543	538
	0.703	544	542.5	539
	0.704	544.5	543.5	542
	0.705	547.5	544.5	538
	0.706	550.5	540.5	538.5
	0.707	544	543.5	538.5
	0.708	544.5	543	540
	0.709	546.5	542.5	538.5
	0.71	546.5	540	537
	0.711	547.5	546.5	538.5
	0.712	544.5	539.5	540
	0.713	544.5	539	534.5
	0.714	544.5	542	536
	0.715	547	542.5	539
	0.716	544.5	540.5	537.5
	0.717	544.5	540	536
	0.718	544.5	538.5	537
	0.719	548	538.5	536
	0.72	544.5	540.5	534
	0.721	544.5	539	536
	0.722	543	541	537.5
	0.723	547	541.5	539.5
	0.724	548	542	538
	0.725	544.5	540	540
	0.726	548.5	540	537.5
	0.727	548	539.5	537
	0.728	547.5	541.5	537
	0.729	544	537	535.5
	0.73	551.5	536.5	535.5
	0.731	547	540.5	537.5
	0.732	548	540	538
	0.733	547	540.5	536
	0.734	548	538.5	537
	0.735	544.5	542	541
	0.736	544.5	541.5	536.5
	0.737	544.5	542.5	533
	0.738	544.5	543	537
	0.739	547	541.5	538
	0.74	544.5	542.5	540
	0.741	544.5	541.5	535
	0.742	547	542.5	539
	0.743	547.5	543.5	536.5
	0.744	548.5	543.5	538.5
	0.745	547	541	538
	0.746	546.5	544	538.5
	0.747	544.5	541	537
	0.748	551.5	540	538
	0.749	547	541.5	540
	0.75	544	541	539.5
	0.751	547	544	536.5
	0.752	550.5	541.5	537.5
	0.753	547.5	542.5	535
	0.754	544.5	540.5	539.5
	0.755	544.5	542.5	539
	0.756	548.5	544	540
	0.757	549.5	546.5	538
	0.758	542	543	540
	0.759	543.5	544.5	537
	0.76	547	541	540
	0.761	544.5	542	539
	0.762	542.5	542.5	542
	0.763	544.5	542.5	540
	0.764	543.5	544.5	538
	0.765	549	543	544.5
	0.766	547	542.5	543
	0.767	544.5	542.5	539
	0.768	544.5	544.5	543.5
	0.769	547	544.5	541.5
	0.77	546	544.5	542.5
	0.771	544.5	544.5	539.5
	0.772	548	542.5	540.5
	0.773	544	543.5	543
	0.774	544.5	547	540
	0.775	548.5	543.5	541.5
	0.776	544.5	543	538.5
	0.777	543.5	543	544.5
	0.778	544.5	540	539.5
	0.779	551	542.5	540
	0.78	547	544.5	543.5
	0.781	544.5	542	540.5
	0.782	544.5	544.5	540
	0.783	544.5	543	540.5
	0.784	544.5	543	542
	0.785	544.5	543.5	540
	0.786	544.5	544.5	542.5
	0.787	542	544	540
	0.788	548.5	542	539
	0.789	544.5	540	543.5
	0.79	544.5	544.5	540.5
	0.791	548	544	543
	0.792	543.5	544	541.5
	0.793	548	540	544.5
	0.794	544	543	544
	0.795	542	544	543
	0.796	544.5	541.5	540.5
	0.797	547	543.5	544.5
	0.798	544.5	541	540.5
	0.799	544.5	540.5	541.5
	0.8	544.5	544.5	543.5
	0.801	547	544	546.5
	0.802	547.5	540	542.5
	0.803	548.5	542	542
	0.804	544.5	540	541.5
	0.805	541.5	541.5	544.5
	0.806	544.5	542.5	540.5
	0.807	544	542	542
	0.808	542.5	542.5	542
	0.809	544.5	539	544.5
	0.81	542	539.5	538.5
	0.811	542	544.5	542
	0.812	540.5	541	544.5
	0.813	541.5	543	547
	0.814	547.5	540.5	544.5
	0.815	544.5	541	541.5
	0.816	544.5	540.5	544.5
	0.817	542	540	542.5
	0.818	539.5	539.5	541.5
	0.819	542	539.5	544.5
	0.82	539.5	541.5	543
	0.821	543	542	544
	0.822	541	544.5	544
	0.823	547	540.5	544.5
	0.824	542	538.5	542
	0.825	544.5	537	541.5
	0.826	540	540	542
	0.827	543	542	547
	0.828	539	538.5	544.5
	0.829	541.5	538	541.5
	0.83	542	540.5	544.5
	0.831	540.5	541	542.5
	0.832	540.5	540.5	544.5
	0.833	539.5	540.5	542.5
	0.834	541.5	539.5	542
	0.835	544.5	542.5	543
	0.836	543.5	539	542.5
	0.837	542	541.5	541
	0.838	539.5	540	546.5
	0.839	543	539	544.5
	0.84	542	540.5	542.5
	0.841	540	540	544
	0.842	541.5	540	542
	0.843	540.5	538	544
	0.844	541.5	541	542.5
	0.845	541	538.5	544.5
	0.846	537.5	542	540
	0.847	542.5	541.5	541.5
	0.848	542	540.5	547.5
	0.849	540	540.5	544.5
	0.85	540	540	544.5
	0.851	540	544.5	542.5
	0.852	538	538.5	544
	0.853	541.5	543.5	543.5
	0.854	537	535	544
	0.855	539	543.5	543.5
	0.856	543	540	543
	0.857	538.5	544	547
	0.858	537	537.5	541.5
	0.859	540	542.5	542.5
	0.86	539.5	539.5	544.5
	0.861	539.5	540.5	542.5
	0.862	542	541	544.5
	0.863	539.5	540.5	543.5
	0.864	542.5	540.5	544.5
	0.865	542.5	538	544
	0.866	540	542	544.5
	0.867	542.5	541	543.5
	0.868	540	541	542.5
	0.869	541.5	540	544.5
	0.87	540	544	544
	0.871	541	543	541
	0.872	540	540	544.5
	0.873	546.5	543	543
	0.874	542.5	542.5	544
	0.875	544.5	541.5	543.5
	0.876	544	540.5	543
	0.877	542	539	541.5
	0.878	544	541.5	544
	0.879	542	540.5	540.5
	0.88	543	542	544.5
	0.881	543.5	542.5	540
	0.882	544	544.5	543
	0.883	542	540	539.5
	0.884	544.5	543.5	541.5
	0.885	543	540	538
	0.886	544.5	542.5	543
	0.887	544.5	541.5	542.5
	0.888	544.5	547	544
	0.889	544.5	538.5	541
	0.89	544	543	535
	0.891	549.5	543.5	542
	0.892	548	540.5	544.5
	0.893	544.5	542	539.5
	0.894	549	537.5	541.5
	0.895	546.5	540	542
	0.896	548	542.5	542.5
	0.897	544.5	540.5	540
	0.898	544.5	540	542.5
	0.899	547	544	540.5
	0.9	547	542.5	542
	0.901	544	541.5	543.5
	0.902	546	540	540
	0.903	544.5	542.5	542
	0.904	544.5	539	543.5
	0.905	544.5	540	544
	0.906	547	541.5	541.5
	0.907	544.5	538.5	541.5
	0.908	549	543.5	543.5
	0.909	547.5	544.5	539.5
	0.91	544.5	542	542.5
	0.911	552	541.5	538
	0.912	549	543.5	540.5
	0.913	544.5	544.5	541.5
	0.914	547	547	538.5
	0.915	544.5	544.5	540.5
	0.916	544.5	540.5	540.5
	0.917	550	548	538
	0.918	544	542.5	540.5
	0.919	548.5	540.5	547
	0.92	544.5	544.5	542
	0.921	547	544	542
	0.922	544.5	541.5	540.5
	0.923	544.5	540.5	539.5
	0.924	548	543	542.5
	0.925	544.5	541	541.5
	0.926	547	544	541
	0.927	543.5	544.5	542
	0.928	547	544.5	544.5
	0.929	547	544.5	540.5
	0.93	547	544	539
	0.931	547.5	544.5	543.5
	0.932	544	544.5	540.5
	0.933	549	541	540
	0.934	544.5	543	541
	0.935	544.5	542.5	539.5
	0.936	544.5	544.5	540
	0.937	544.5	544.5	544.5
	0.938	543	543	541.5
	0.939	544	543.5	540
	0.94	544.5	547.5	542
	0.941	544.5	544.5	540
	0.942	544.5	544	539.5
	0.943	548	542.5	539
	0.944	544	544	542.5
	0.945	544.5	543.5	542.5
	0.946	547	541.5	543.5
	0.947	543	541	540
	0.948	544.5	544.5	539
	0.949	542	541	541
	0.95	544.5	544.5	541.5
	0.951	541.5	544.5	541.5
	0.952	544.5	544.5	542.5
	0.953	544.5	544.5	541.5
	0.954	544.5	544	541.5
	0.955	544.5	547	540
	0.956	544.5	548	540.5
	0.957	544.5	543.5	542.5
	0.958	544.5	544.5	540.5
	0.959	544.5	544.5	544.5
	0.96	540.5	546.5	541.5
	0.961	544	544.5	540
	0.962	540.5	544.5	540.5
	0.963	543.5	544.5	543.5
	0.964	544.5	544	543.5
	0.965	543.5	548	540
	0.966	544.5	544.5	540
	0.967	546.5	547	540.5
	0.968	544.5	549.5	542.5
	0.969	544.5	544.5	538.5
	0.97	546.5	549	543.5
	0.971	544.5	544.5	541.5
	0.972	544.5	546.5	541.5
	0.973	543.5	544.5	542
	0.974	544.5	544.5	542
	0.975	541.5	547	540
	0.976	544.5	543.5	544.5
	0.977	540.5	544	542.5
	0.978	544.5	543.5	540
	0.979	547.5	547.5	543
	0.98	546	544.5	542.5
	0.981	544.5	547	542.5
	0.982	544.5	547	542.5
	0.983	546.5	552	541
	0.984	544	548	544.5
	0.985	547	544	543
	0.986	544.5	544.5	540
	0.987	543.5	546.5	542
	0.988	548	544.5	544.5
	0.989	543.5	543.5	542.5
	0.99	551	544.5	543
	0.991	546.5	544.5	541.5
	0.992	548	547	544.5
	0.993	549.5	548	544
	0.994	547.5	547	547
	0.995	544.5	548	542
	0.996	547	544.5	547
	0.997	544.5	544	543.5
	0.998	544.5	544.5	543.5
	0.999	547	544.5	544.5
	1	549.5	544.5	544.5
	1.001	548	547	543
	1.002	547.5	543.5	544.5
	1.003	548.5	543	544.5
	1.004	548.5	542	544.5
	1.005	547.5	544	547
	1.006	550.5	543	544.5
	1.007	550.5	542.5	544.5
	1.008	549.5	541.5	548.5
	1.009	550	539.5	544.5
	1.01	552.5	540.5	547
	1.011	550	540	544.5
	1.012	551	542.5	548
	1.013	549.5	544	544.5
	1.014	548	541.5	544.5
	1.015	548	540.5	540.5
	1.016	551	541.5	547.5
	1.017	551	537.5	546.5
	1.018	553	540.5	542.5
	1.019	552.5	539	544.5
	1.02	549.5	538	549.5
	1.021	550.5	540	543.5
	1.022	550.5	541.5	544.5
	1.023	553.5	539.5	547
	1.024	549	541.5	547
	1.025	547.5	542	544.5
	1.026	549.5	540.5	541
	1.027	551	537	544.5
	1.028	552	537	547
	1.029	551	539	547.5
	1.03	553	536.5	544.5
	1.031	550	538	544.5
	1.032	550	540.5	544.5
	1.033	550.5	540	542.5
	1.034	550	542.5	544.5
	1.035	549.5	542.5	547
	1.036	551.5	538	549.5
	1.037	547	535.5	549
	1.038	547.5	539	544.5
	1.039	549.5	539	544.5
	1.04	548	540	544.5
	1.041	550.5	539.5	547
	1.042	551.5	540	544
	1.043	550.5	538	544.5
	1.044	548	541.5	547
	1.045	546.5	538.5	547
	1.046	548	540	544.5
	1.047	549	539.5	544.5
	1.048	547.5	541.5	544.5
	1.049	544.5	541.5	544.5
	1.05	549.5	540	544
	1.051	544.5	539	547
	1.052	547	539	542
	1.053	544.5	539	544
	1.054	547	542.5	544.5
	1.055	546.5	541	543
	1.056	544	543	543.5
	1.057	547.5	540.5	544.5
	1.058	549.5	542	546
	1.059	547	542	544.5
	1.06	548.5	543.5	544.5
	1.061	549	540	544.5
	1.062	549.5	541.5	542
	1.063	547	543.5	544
	1.064	548	543	540
	1.065	549.5	542.5	540
	1.066	543.5	544.5	541.5
	1.067	550.5	542.5	543.5
	1.068	546.5	542	543.5
	1.069	548.5	544	540
	1.07	547	544	542
	1.071	548.5	544.5	544
	1.072	547	543.5	544.5
	1.073	550	542	543
	1.074	549	543.5	540
	1.075	548	544.5	542
	1.076	549	544	543
	1.077	547.5	542.5	541
	1.078	548.5	541.5	542.5
	1.079	547.5	543.5	543
	1.08	548	543.5	543
	1.081	544.5	543	540.5
	1.082	550	541.5	540.5
	1.083	544.5	544	541.5
	1.084	549	544	541
	1.085	548	544.5	544.5
	1.086	544	544.5	542
	1.087	543.5	542	546.5
	1.088	548	544	541.5
	1.089	549.5	542.5	542
	1.09	544.5	541.5	541.5
	1.091	549	544.5	540.5
	1.092	543	547	539
	1.093	547	544.5	542
	1.094	547	544.5	541
	1.095	544	539.5	544.5
	1.096	544	544.5	542.5
	1.097	544.5	544.5	544.5
	1.098	547	547	540
	1.099	543.5	544.5	540
	1.1	544.5	543.5	539
	1.101	543.5	543.5	540
	1.102	544.5	544.5	540.5
	1.103	544.5	542.5	541
	1.104	544.5	540.5	541
	1.105	546	542.5	543.5
	1.106	543.5	546	544.5
	1.107	543.5	542.5	538
	1.108	544.5	544.5	541
	1.109	547.5	544.5	538
	1.11	544.5	543	539.5
	1.111	543	544.5	541
	1.112	546.5	543.5	542
	1.113	544.5	544.5	539.5
	1.114	543.5	542	539
	1.115	544.5	540.5	540
	1.116	540	544	544.5
	1.117	544.5	544.5	544.5
	1.118	544	541.5	542
	1.119	542	543	537.5
	1.12	544.5	542.5	539
	1.121	548	542.5	541.5
	1.122	543.5	543	541.5
	1.123	543.5	542	543
	1.124	543.5	540.5	543
	1.125	543	539.5	539
	1.126	546.5	542	544.5
	1.127	548	543.5	540.5
	1.128	544.5	540.5	539
	1.129	543.5	543	540.5
	1.13	543	542	540
	1.131	543	544	542.5
	1.132	544.5	540	544
	1.133	544.5	543	541.5
	1.134	544.5	540.5	543.5
	1.135	544.5	541	541.5
	1.136	540.5	542.5	543
	1.137	544.5	541.5	541.5
	1.138	542	544.5	540.5
	1.139	547	539.5	542
	1.14	546.5	542.5	544.5
	1.141	544.5	543.5	539
	1.142	547	541.5	542
	1.143	544.5	540	544.5
	1.144	548.5	541.5	543.5
	1.145	544.5	544	543
	1.146	547	542.5	544
	1.147	544.5	544.5	543.5
	1.148	544.5	544.5	543.5
	1.149	548.5	544	544.5
	1.15	549	544	544.5
	1.151	547	544.5	542
	1.152	546.5	544.5	546.5
	1.153	544.5	546	547
	1.154	544.5	547	544.5
	1.155	544.5	544.5	543
	1.156	544.5	549	544.5
	1.157	548.5	544.5	544.5
	1.158	547	543.5	544.5
	1.159	548	547	542.5
	1.16	544.5	544.5	546.5
	1.161	542.5	543	544.5
	1.162	544.5	544.5	547
	1.163	544.5	544.5	544.5
	1.164	547	544.5	547
	1.165	549.5	544.5	544.5
	1.166	544.5	547	546.5
	1.167	544.5	547	544.5
	1.168	544.5	543	544.5
	1.169	547.5	544.5	544
	1.17	547	549	546.5
	1.171	544.5	550	547
	1.172	544.5	546.5	550
	1.173	546.5	549	547
	1.174	546.5	544.5	544.5
	1.175	549.5	544.5	542.5
	1.176	544.5	548	547
	1.177	544.5	544.5	547
	1.178	544.5	544.5	541.5
	1.179	546.5	544	544.5
	1.18	544.5	547	544.5
	1.181	544.5	544.5	544.5
	1.182	549	544.5	544
	1.183	547	548	544.5
	1.184	547	544.5	544
	1.185	544.5	544.5	543.5
	1.186	543	547	544.5
	1.187	547.5	546.5	544.5
	1.188	548.5	544	544
	1.189	547	547	541
	1.19	544.5	544	542.5
	1.191	546.5	547	544.5
	1.192	547	547	542
	1.193	544.5	544.5	544.5
	1.194	544.5	543	547
	1.195	547	544.5	544.5
	1.196	546.5	541.5	542.5
	1.197	544.5	548	541
	1.198	544.5	547	544.5
	1.199	548.5	543	544
	1.2	547	544.5	543
	1.201	544	549.5	542.5
	1.202	544.5	544.5	542
	1.203	544.5	543	542
	1.204	544	541	541.5
	1.205	543.5	544.5	544.5
	1.206	544.5	543	543
	1.207	547.5	544.5	543.5
	1.208	547.5	542	544.5
	1.209	542.5	541.5	543
	1.21	548	542	544.5
	1.211	547	541.5	543.5
	1.212	547.5	543	541.5
	1.213	544.5	541	540
	1.214	549	542	542
	1.215	543	540	543
	1.216	544	539.5	540
	1.217	547	540.5	542.5
	1.218	543.5	543.5	542.5
	1.219	544.5	539	543
	1.22	544.5	540	542
	1.221	544.5	543.5	539.5
	1.222	544	541	540
	1.223	544.5	539	539.5
	1.224	544.5	540	541
	1.225	542.5	540	540
	1.226	547	540.5	541.5
	1.227	544.5	537	538.5
	1.228	544.5	539.5	544
	1.229	546.5	541.5	540
	1.23	544.5	540	542.5
	1.231	549.5	540	540.5
	1.232	544.5	541.5	540
	1.233	549.5	536.5	541
	1.234	544	542	542
	1.235	548	538	541
	1.236	544.5	540.5	543.5
	1.237	548	537	540
	1.238	544.5	537.5	538
	1.239	547	536.5	541
	1.24	544.5	541.5	541.5
	1.241	544.5	542	542
	1.242	549	537	543.5
	1.243	549	540.5	541.5
	1.244	547	541	542
	1.245	544.5	540	538.5
	1.246	544.5	539	540
	1.247	548	539.5	540
	1.248	549.5	540	540
	1.249	550	538.5	540.5
	1.25	553	541	540.5
	1.251	547	540	540
	1.252	550	544	539.5
	1.253	544.5	542	541.5
	1.254	546.5	540.5	540.5
	1.255	547.5	543.5	538
	1.256	542.5	544	541.5
	1.257	547.5	542	538.5
	1.258	553	544.5	540.5
	1.259	551	544.5	540
	1.26	547	544	540.5
	1.261	549	543.5	540.5
	1.262	553	548	540
	1.263	548	542.5	540
	1.264	548.5	547	538
	1.265	552	544.5	536
	1.266	550	543.5	541
	1.267	552.5	544.5	537.5
	1.268	549.5	543.5	540
	1.269	549.5	541.5	540
	1.27	549.5	544.5	540
	1.271	547	544.5	538.5
	1.272	548	547.5	538.5
	1.273	548	547	539.5
	1.274	549	544.5	540
	1.275	550	547	539.5
	1.276	551.5	546	538
	1.277	547	548.5	540.5
	1.278	547	547	540.5
	1.279	547.5	543	539.5
	1.28	551	549.5	540
	1.281	549	547	541
	1.282	549	548.5	537.5
	1.283	547	548.5	540
	1.284	547	544.5	538
	1.285	547.5	547	542
	1.286	550	544.5	541.5
	1.287	548.5	548	541.5
	1.288	549.5	548.5	539.5
	1.289	550.5	547	540
	1.29	544.5	542.5	540
	1.291	549	544.5	540.5
	1.292	544.5	544.5	541
	1.293	547	544.5	539.5
	1.294	547.5	546.5	544
	1.295	548	544.5	542
	1.296	547	544.5	540
	1.297	549.5	544.5	544
	1.298	547	546.5	544
	1.299	547.5	544.5	543
	1.3	543.5	544.5	541
	1.301	543	548	538
	1.302	544.5	542.5	540
	1.303	544.5	543	540
	1.304	544	540.5	537.5
	1.305	544.5	543.5	541.5
	1.306	544.5	541	541
	1.307	544.5	544.5	540
	1.308	544.5	544.5	544
	1.309	541.5	541	540.5
	1.31	543	540.5	541
	1.311	544.5	543.5	544
	1.312	542.5	538.5	541
	1.313	543.5	541.5	540.5
	1.314	544.5	539	542
	1.315	544.5	541	544.5
	1.316	541.5	540	541
	1.317	544	538.5	541
	1.318	543	540	540
	1.319	540	540	543.5
	1.32	541.5	538	542
	1.321	544.5	537.5	540
	1.322	544	539.5	541
	1.323	543.5	539	538
	1.324	542	538	543.5
	1.325	542	538.5	542.5
	1.326	544.5	538.5	543.5
	1.327	542	536	544.5
	1.328	543	536	543
	1.329	544.5	535.5	541
	1.33	540.5	537	541
	1.331	539.5	539	544
	1.332	542.5	536	541
	1.333	539.5	535	544
	1.334	542	533	540
	1.335	542.5	534	540
	1.336	540	536	541
	1.337	542.5	533	544
	1.338	539.5	538.5	544.5
	1.339	542.5	535.5	540
	1.34	540	535.5	542
	1.341	543	535	540
	1.342	541	535	544.5
	1.343	544.5	534	544.5
	1.344	538	529.5	547
	1.345	546.5	534.5	546
	1.346	542.5	533	544.5
	1.347	543.5	534	544
	1.348	544.5	536.5	544.5
	1.349	541.5	535.5	541.5
	1.35	543	535.5	544.5
	1.351	541.5	533	543
	1.352	538.5	536	541
	1.353	544.5	532.5	547.5
	1.354	544.5	539	544.5
	1.355	542	531.5	543
	1.356	541	535.5	542
	1.357	544.5	534	546.5
	1.358	544.5	535	542
	1.359	541.5	536.5	544.5
	1.36	544.5	536.5	544.5
	1.361	543.5	537	542
	1.362	543	542.5	544.5
	1.363	544	540.5	544
	1.364	547	538	543
	1.365	544.5	537	540.5
	1.366	544.5	538	544.5
	1.367	547	540.5	544.5
	1.368	544.5	536.5	548.5
	1.369	544.5	538.5	542
	1.37	550.5	537	544.5
	1.371	544	539.5	543.5
	1.372	543.5	540	544.5
	1.373	544.5	541.5	541
	1.374	544.5	540	544.5
	1.375	544	539.5	544.5
	1.376	543.5	542	544.5
	1.377	544.5	540.5	543.5
	1.378	544.5	538.5	547.5
	1.379	547	539.5	541
	1.38	544.5	544	544.5
	1.381	541.5	544.5	544
	1.382	548	544.5	544
	1.383	544.5	542	547
	1.384	548	544	544.5
	1.385	547.5	540.5	544.5
	1.386	544.5	544.5	544.5
	1.387	547.5	543	547.5
	1.388	544.5	544.5	544.5
	1.389	544.5	544.5	544.5
	1.39	548	544	547.5
	1.391	544.5	544.5	544.5
	1.392	547	542.5	544.5
	1.393	547	547	544
	1.394	547	544.5	542.5
	1.395	551	544.5	544
	1.396	548	544.5	541.5
	1.397	544.5	547.5	544.5
	1.398	548.5	544.5	540
	1.399	547	544.5	544.5
	1.4	547.5	543.5	542.5
	1.401	547.5	544	541
	1.402	548	547	541
	1.403	547	544.5	542
	1.404	547	547	544.5
	1.405	544.5	543.5	544.5
	1.406	547.5	549	544
	1.407	549.5	544	544.5
	1.408	549.5	544	544
	1.409	544	541.5	542.5
	1.41	544.5	543.5	542.5
	1.411	549	546.5	540
	1.412	548	544	544
	1.413	549.5	542	540.5
	1.414	544.5	544.5	542.5
	1.415	547	544	544.5
	1.416	547	544.5	542.5
	1.417	547.5	541.5	541.5
	1.418	548.5	544.5	544.5
	1.419	548	544	544.5
	1.42	544.5	544.5	544.5
	1.421	549.5	547	544
	1.422	550	544	541.5
	1.423	544.5	546.5	542
	1.424	547.5	542	538.5
	1.425	544.5	547	540.5
	1.426	548.5	543	543
	1.427	547	544	540
	1.428	547	544.5	539.5
	1.429	548	544.5	544.5
	1.43	544.5	541	540.5
	1.431	544.5	543.5	544.5
	1.432	544.5	546.5	539.5
	1.433	548.5	539.5	543
	1.434	549	540	543
	1.435	547	542.5	538
	1.436	547	547	541.5
	1.437	544.5	544.5	542
	1.438	544	540	541
	1.439	544	544.5	539.5
	1.44	544.5	541	541
	1.441	544.5	543	542.5
	1.442	542.5	539.5	541.5
	1.443	544.5	542	540.5
	1.444	549.5	542.5	544.5
	1.445	544.5	541.5	540
	1.446	544.5	540.5	541
	1.447	546.5	539.5	538.5
	1.448	547.5	544.5	544.5
	1.449	544.5	542	543
	1.45	542.5	542.5	542
	1.451	544.5	540	543
	1.452	544	543.5	543.5
	1.453	544.5	539	541
	1.454	547	540	541.5
	1.455	544.5	542.5	544
	1.456	549	542.5	541.5
	1.457	541.5	544.5	542
	1.458	542	544.5	540
	1.459	544.5	544	544.5
	1.46	543	542.5	544.5
	1.461	544.5	544	544.5
	1.462	544	544.5	544.5
	1.463	543	541.5	542
	1.464	544	542.5	544
	1.465	543	548	541.5
	1.466	543.5	543	547.5
	1.467	544.5	544.5	542.5
	1.468	544.5	542.5	543.5
	1.469	544.5	543	544.5
	1.47	542	544	544
	1.471	544.5	544.5	543.5
	1.472	547.5	544.5	544.5
	1.473	548	547.5	542.5
	1.474	547	547	544.5
	1.475	544.5	544.5	544.5
	1.476	544.5	543.5	547
	1.477	547	544.5	543
	1.478	544.5	544.5	546.5
	1.479	547.5	546.5	542.5
	1.48	546.5	547	544
	1.481	547.5	544.5	544.5
	1.482	549.5	547.5	547
	1.483	546.5	544.5	542.5
	1.484	547	543.5	542.5
	1.485	548	544.5	541
	1.486	551	544.5	544.5
	1.487	544.5	549	544
	1.488	548.5	549	544.5
	1.489	544.5	544.5	541.5
	1.49	552	547.5	544.5
	1.491	547.5	547	541
	1.492	544.5	544.5	544.5
	1.493	547.5	546.5	543
	1.494	544.5	546.5	543
	1.495	546.5	547	543.5
	1.496	544.5	542.5	542.5
	1.497	544.5	544.5	544
	1.498	547	549	544.5
	1.499	548	547	543
	1.5	544.5	548.5	542.5
	1.501	547.5	547	542
	1.502	547.5	548	541.5
	1.503	544.5	544.5	544.5
	1.504	546.5	544.5	542
	1.505	549.5	544.5	547
	1.506	547.5	543	542
	1.507	543	539	544.5
	1.508	548	542.5	540
	1.509	547.5	544.5	537
	1.51	544.5	547	541.5
	1.511	547	544.5	539
	1.512	547	544.5	542.5
	1.513	544.5	544	541.5
	1.514	547	542	542
	1.515	544.5	541	544.5
	1.516	544.5	541.5	540.5
	1.517	544.5	538.5	539
	1.518	542.5	542.5	540.5
	1.519	544.5	544	542
	1.52	544	542	543.5
	1.521	544.5	541	541.5
	1.522	544.5	540	540
	1.523	544	544.5	543
	1.524	542	544	542.5
	1.525	547	540	546.5
	1.526	543.5	540	542.5
	1.527	544	541	544
	1.528	541.5	540	542
	1.529	543	540	542.5
	1.53	544.5	540	543
	1.531	544.5	538	542.5
	1.532	547.5	538	538
	1.533	547.5	541.5	543
	1.534	544.5	537	544.5
	1.535	542	538.5	539
	1.536	544.5	539.5	542.5
	1.537	542.5	538.5	544.5
	1.538	543.5	536.5	540
	1.539	543	540.5	542
	1.54	544.5	540	541
	1.541	544	539.5	541.5
	1.542	544.5	536.5	541
	1.543	543	538	540
	1.544	544.5	540.5	543.5
	1.545	544	539.5	541
	1.546	541	537.5	542.5
	1.547	544.5	539	540
	1.548	544.5	539	539
	1.549	541.5	538	544.5
	1.55	543	539.5	544
	1.551	544.5	534.5	543
	1.552	547	540	541
	1.553	544.5	541.5	541
	1.554	549.5	538.5	542.5
	1.555	547	538.5	543.5
	1.556	542.5	541	542
	1.557	544	540.5	541
	1.558	544	544	542.5
	1.559	544.5	538.5	541
	1.56	544.5	536.5	540
	1.561	546.5	544.5	544
	1.562	543.5	539.5	541
	1.563	547.5	539.5	541.5
	1.564	543.5	540	541.5
	1.565	544.5	539	540.5
	1.566	547.5	539	543.5
	1.567	544.5	541.5	544.5
	1.568	544.5	541.5	542.5
	1.569	544.5	541	540
	1.57	543.5	542	541.5
	1.571	546.5	540.5	540.5
	1.572	544.5	541	540.5
	1.573	543.5	544.5	540
	1.574	546	543	541
	1.575	547	547	541.5
	1.576	547	544	540
	1.577	547.5	542.5	541
	1.578	548	543	540.5
	1.579	544.5	544.5	541.5
	1.58	544.5	544.5	543
	1.581	549.5	542.5	542
	1.582	547.5	546.5	542
	1.583	547	541.5	542
	1.584	550.5	544	548
	1.585	543.5	546.5	542.5
	1.586	547	544.5	540
	1.587	548	544.5	543.5
	1.588	547.5	541.5	544.5
	1.589	548	542	547
	1.59	550	546.5	544.5
	1.591	547.5	542.5	544.5
	1.592	544.5	544	543
	1.593	551	543.5	547
	1.594	548	543.5	547
	1.595	548	544.5	544.5
	1.596	544.5	541.5	544.5
	1.597	547.5	541.5	544.5
	1.598	544.5	544.5	543.5
	1.599	549.5	544.5	544.5
	1.6	544.5	544.5	544.5
	1.601	549	542	543.5
	1.602	548.5	543.5	547
	1.603	544.5	543.5	547
	1.604	547.5	541	544.5
	1.605	547	544.5	548.5
	1.606	550	541.5	544.5
	1.607	547	542	549
	1.608	544.5	540	544
	1.609	549.5	543	549.5
	1.61	544.5	541.5	544.5
	1.611	549	540	547
	1.612	547	542.5	550
	1.613	548.5	542.5	544.5
	1.614	544.5	541.5	550
	1.615	549	540.5	549
	1.616	547.5	541.5	550.5
	1.617	544.5	542	552
	1.618	544.5	543.5	550
	1.619	544	540	551.5
	1.62	544.5	538.5	553
	1.621	544.5	540	550.5
	1.622	544.5	540	551.5
	1.623	549	536	551.5
	1.624	544.5	540	548
	1.625	546.5	544.5	549
	1.626	544.5	541	552.5
	1.627	547.5	540	550
	1.628	547.5	539	552
	1.629	547.5	538.5	553
	1.63	544.5	543.5	552.5
	1.631	542.5	539	550.5
	1.632	544.5	541.5	551.5
	1.633	544.5	539.5	548
	1.634	547.5	540	552.5
	1.635	547	540	554
	1.636	547	541.5	553.5
	1.637	544.5	543	552
	1.638	544.5	544	552
	1.639	541.5	541	550
	1.64	543.5	540.5	553.5
	1.641	543	541.5	555.5
	1.642	540	540	553.5
	1.643	548	540	554
	1.644	547	542	553
	1.645	544.5	542	553.5
	1.646	544	542	555
	1.647	544.5	543.5	555.5
	1.648	543	543.5	555.5
	1.649	543	542.5	551.5
	1.65	543	542.5	553
	1.651	544.5	544	558
	1.652	547	544.5	553
	1.653	547.5	544.5	552
	1.654	542	544.5	555
	1.655	547	544.5	550.5
	1.656	543.5	544.5	557.5
	1.657	544.5	548	554.5
	1.658	544.5	544.5	557
	1.659	544.5	547	553.5
	1.66	546.5	544.5	550
	1.661	548	547.5	551.5
	1.662	547	548	552
	1.663	544.5	547.5	553.5
	1.664	544.5	544.5	550.5
	1.665	547	549.5	556.5
	1.666	544.5	544.5	553
	1.667	547	548.5	555.5
	1.668	543.5	544.5	552.5
	1.669	548.5	544.5	551
	1.67	547.5	544.5	554
	1.671	547.5	548.5	552.5
	1.672	550	548.5	552.5
	1.673	548	548.5	548
	1.674	544.5	549.5	547
	1.675	544.5	544.5	553.5
	1.676	550	544	549
	1.677	544.5	547	548
	1.678	544.5	547	547.5
	1.679	549	548	549.5
	1.68	549	551.5	548
	1.681	547.5	548	544.5
	1.682	551	547.5	549
	1.683	548	549.5	542.5
	1.684	548.5	544.5	544.5
	1.685	549	547	547
	1.686	548	547.5	543.5
	1.687	550.5	547.5	544.5
	1.688	548.5	542	542.5
	1.689	549.5	547	544.5
	1.69	550	548	543
	1.691	550	547.5	543.5
	1.692	547	544.5	544.5
	1.693	547	543.5	542
	1.694	552	544.5	542
	1.695	553	550	539.5
	1.696	550	543.5	540.5
	1.697	549	544.5	543
	1.698	550	544.5	538.5
	1.699	550	548.5	540
	1.7	550	543.5	537.5
	1.701	552.5	541.5	539
	1.702	549.5	544.5	538.5
	1.703	551	544.5	539.5
	1.704	551.5	544	533.5
	1.705	553.5	544	538
	1.706	552	544	537
	1.707	553	544	534
	1.708	552	543	536.5
	1.709	550.5	543.5	532
	1.71	551.5	543.5	533.5
	1.711	548.5	540	536.5
	1.712	553	542	531.5
	1.713	549	541.5	535
	1.714	549.5	540.5	529.5
	1.715	551	547	531
	1.716	548	540	532
	1.717	552.5	542.5	526.5
	1.718	552	541	531.5
	1.719	551	542	531.5
	1.72	548.5	539	531
	1.721	548	538.5	533.5
	1.722	547.5	544.5	529.5
	1.723	548.5	539.5	529.5
	1.724	548.5	544.5	528
	1.725	552	540	533
	1.726	550.5	541	532.5
	1.727	548	543	531
	1.728	549	541.5	528.5
	1.729	548	541	529
	1.73	551.5	541.5	527.5
	1.731	547.5	537	531
	1.732	550.5	540.5	528.5
	1.733	548	540	532.5
	1.734	544.5	537.5	533.5
	1.735	544.5	540	531.5
	1.736	544.5	537	533.5
	1.737	548.5	539	532
	1.738	548	544	529.5
	1.739	547	539.5	532
	1.74	548	542.5	527.5
	1.741	544.5	542.5	531
	1.742	546.5	541.5	531
	1.743	544.5	540.5	531.5
	1.744	551	544.5	536
	1.745	547	540	532
	1.746	542	544.5	534
	1.747	547.5	544.5	538
	1.748	548.5	542.5	533.5
	1.749	544.5	543	537
	1.75	544	544	536.5
	1.751	544.5	543.5	533.5
	1.752	542.5	543	539
	1.753	547.5	542.5	535.5
	1.754	544.5	542.5	536.5
	1.755	544.5	541	537.5
	1.756	544.5	544	540
	1.757	543.5	539.5	538.5
	1.758	547	540.5	540
	1.759	544	544	538
	1.76	547.5	542.5	540.5
	1.761	548	544.5	541
	1.762	547	540	539.5
	1.763	546.5	541.5	543.5
	1.764	547	547	544.5
	1.765	549.5	544.5	543
	1.766	550.5	542	541
	1.767	548.5	544	544
	1.768	550.5	541.5	544.5
	1.769	549	544.5	542.5
	1.77	547.5	541	544.5
	1.771	550	540.5	541.5
	1.772	552	544	542
	1.773	547	543.5	541
	1.774	553	543.5	541
	1.775	549	544.5	542
	1.776	549.5	540.5	544.5
	1.777	553	542.5	544.5
	1.778	548	540.5	547
	1.779	553	540	544.5
	1.78	548	542.5	550
	1.781	550	544	550.5
	1.782	552	540.5	544.5
	1.783	554.5	543.5	549
	1.784	551	541.5	543
	1.785	553	541	543.5
	1.786	548	541	544.5
	1.787	555.5	540.5	548.5
	1.788	552	539.5	544.5
	1.789	553.5	538.5	544.5
	1.79	547.5	544	548
	1.791	554	541.5	547
	1.792	554	539.5	544
	1.793	552.5	538	544.5
	1.794	548.5	540	544.5
	1.795	554.5	542.5	548
	1.796	552	539	547
	1.797	553.5	538.5	544.5
	1.798	553.5	540	544
	1.799	554	540	543
	1.8	554	539	544
	1.801	554.5	540	544.5
	1.802	552.5	538.5	544
	1.803	552	536	544.5
	1.804	549	539	544.5
	1.805	551	540	546.5
	1.806	551	540	542
	1.807	551.5	541.5	540
	1.808	550	540	544.5
	1.809	550	540	544.5
	1.81	548.5	538.5	543.5
	1.811	550	535	541
	1.812	548	540	546.5
	1.813	547	541.5	546
	1.814	552.5	541	544
	1.815	549	539	544
	1.816	549	542	542.5
	1.817	552	540.5	544.5
	1.818	547.5	536.5	538.5
	1.819	547	539.5	544.5
	1.82	550.5	536	542
	1.821	548.5	541	544.5
	1.822	544.5	538.5	544.5
	1.823	547.5	540	542
	1.824	547	541.5	541
	1.825	547	542	543
	1.826	544.5	540	540
	1.827	544.5	539	540.5
	1.828	544.5	544	544.5
	1.829	544.5	538	544.5
	1.83	549	541.5	543.5
	1.831	544.5	540.5	540.5
	1.832	544.5	542.5	542.5
	1.833	544.5	538	540.5
	1.834	542.5	539.5	544
	1.835	543.5	543	544.5
	1.836	539.5	544	547.5
	1.837	540	540.5	544.5
	1.838	543.5	543.5	541
	1.839	543.5	540	544.5
	1.84	539.5	543.5	542.5
	1.841	544.5	539.5	544.5
	1.842	543	540	548.5
	1.843	544.5	541	544.5
	1.844	544.5	543	544.5
	1.845	543	542.5	547
	1.846	540.5	544.5	544.5
	1.847	544.5	543.5	544.5
	1.848	544.5	547	544
	1.849	541	544.5	544.5
	1.85	540	544	548.5
	1.851	541.5	543	544.5
	1.852	543.5	544.5	546
	1.853	540.5	544.5	544.5
	1.854	541	541.5	544.5
	1.855	540	542.5	548
	1.856	540	544.5	544.5
	1.857	538.5	547	548.5
	1.858	543	544.5	550
	1.859	538.5	548.5	546.5
	1.86	543	544.5	548
	1.861	540	543	547
	1.862	542	548	546.5
	1.863	543.5	544.5	544.5
	1.864	542.5	544	544.5
	1.865	540.5	546.5	544
	1.866	535	549.5	544.5
	1.867	540	548	547
	1.868	540.5	547	544.5
	1.869	542	544.5	547
	1.87	541	546.5	543.5
	1.871	541.5	548	544.5
	1.872	543	544.5	544.5
	1.873	543	548.5	547
	1.874	540	549.5	544
	1.875	543.5	548.5	544.5
	1.876	540.5	548	544.5
	1.877	540.5	548	540
	1.878	542.5	549	542.5
	1.879	540.5	548	544.5
	1.88	541.5	550.5	542
	1.881	542	547.5	544.5
	1.882	543.5	550.5	542
	1.883	543.5	552	544
	1.884	541.5	550	541.5
	1.885	540	552.5	540.5
	1.886	543	551	543
	1.887	544.5	548.5	544.5
	1.888	541	547.5	541.5
	1.889	540	546.5	542
	1.89	543.5	547	542.5
	1.891	543.5	549	540
	1.892	540	551	543.5
	1.893	541	550.5	540
	1.894	539	548.5	540
	1.895	541.5	553.5	541.5
	1.896	541.5	547	542.5
	1.897	542	549.5	540.5
	1.898	540	547	535.5
	1.899	541.5	544.5	540.5
	1.9	544.5	550	536.5
	1.901	543	544.5	538.5
	1.902	544.5	547	538
	1.903	542	550	540.5
	1.904	543.5	549	538.5
	1.905	542.5	550.5	540
	1.906	542.5	548	542.5
	1.907	540	546.5	537.5
	1.908	542	548	535
	1.909	544.5	551	537
	1.91	544.5	547.5	537.5
	1.911	544.5	548	535
	1.912	541.5	548	536.5
	1.913	543.5	548.5	536.5
	1.914	540	547	536.5
	1.915	544.5	549.5	536
	1.916	544.5	547.5	535
	1.917	544.5	548.5	535
	1.918	544.5	543.5	537.5
	1.919	540.5	548	534
	1.92	544.5	549	538
	1.921	546.5	547.5	539.5
	1.922	541.5	550	538.5
	1.923	543.5	547	537
	1.924	544.5	547	537
	1.925	543.5	544.5	538
	1.926	543.5	544.5	538.5
	1.927	544.5	547	537
	1.928	542.5	548.5	540
	1.929	547.5	548	540.5
	1.93	541.5	544.5	537
	1.931	542	544.5	541.5
	1.932	540.5	544.5	537
	1.933	543.5	544.5	539.5
	1.934	544	544.5	539
	1.935	541.5	544.5	536.5
	1.936	541.5	544.5	539
	1.937	544	543	541
	1.938	544.5	543	540
	1.939	544.5	546.5	540.5
	1.94	547	547	540
	1.941	541.5	543	540.5
	1.942	542.5	547	540
	1.943	547	542	542.5
	1.944	546.5	543.5	542.5
	1.945	544	544.5	540
	1.946	539.5	546	541
	1.947	542.5	543	544.5
	1.948	543	544.5	540.5
	1.949	543.5	543.5	542.5
	1.95	543	544.5	540
	1.951	540	544	544.5
	1.952	543	543	540
	1.953	544.5	543	544.5
	1.954	543.5	544.5	540
	1.955	541.5	544.5	541
	1.956	540.5	544	540.5
	1.957	543	544	542.5
	1.958	542.5	543.5	541.5
	1.959	547	547	542
	1.96	542.5	543.5	543.5
	1.961	544.5	542	542.5
	1.962	542.5	544	542
	1.963	542	541.5	541
	1.964	541.5	543	541
	1.965	542.5	544.5	542.5
	1.966	541	543	541
	1.967	544.5	544.5	540.5
	1.968	542	544.5	540
	1.969	542	542.5	542
	1.97	540	546	540
	1.971	540	541.5	538
	1.972	539.5	543.5	539
	1.973	540	544.5	541
	1.974	540	544.5	536
	1.975	539.5	547	539
	1.976	535	544	540
	1.977	538	544.5	538
	1.978	540.5	544.5	540
	1.979	538.5	543.5	537
	1.98	539	543	536
	1.981	538	544.5	537.5
	1.982	536.5	541.5	538
	1.983	534.5	542.5	539.5
	1.984	537	541	537
	1.985	533.5	542	535.5
	1.986	534.5	543.5	535.5
	1.987	537	542	536
	1.988	531.5	541.5	535.5
	1.989	532.5	543	536.5
	1.99	534	541	537
	1.991	535	544.5	535.5
	1.992	528.5	544	538
	1.993	529.5	544	537.5
[truncated: 6,006 more rows]

## Sheet: B
DataTypeVer2.0	Time	Fz	Fz	Fz
NumberOfData		8000	8000	8000
PreTriggerData		0	0	0
SamplingTime[ms]		1	1	1
DataLabel		S1:CMJ	S2:CMJ	S3:CMJ
DataUnit	sec	N	N	N
	0	715.5	690.5	698
	0.001	714	688	693
	0.002	715.5	689.5	692.5
	0.003	715	689.5	696
	0.004	715	689	697
	0.005	713.5	690	694
	0.006	714	691	696.5
	0.007	715	686	696.5
	0.008	716	686	696.5
	0.009	714	689	695.5
	0.01	711	690	697.5
	0.011	715	690.5	695
	0.012	713	691.5	695
	0.013	715	686	695.5
	0.014	715.5	692.5	697.5
	0.015	712	691.5	697
	0.016	709.5	692.5	694.5
	0.017	715	691.5	696.5
	0.018	711	690	694.5
	0.019	714.5	690.5	696.5
	0.02	713.5	693	695
	0.021	713.5	692.5	697
	0.022	715.5	696	696
	0.023	712.5	692	697.5
	0.024	712	691	698.5
	0.025	712.5	693.5	697
	0.026	714.5	693	698
	0.027	714	692.5	700.5
	0.028	711.5	697.5	699.5
	0.029	714	692	700
	0.03	713	695.5	700
	0.031	714	693.5	700.5
	0.032	713.5	695	700.5
	0.033	714	699.5	701
	0.034	712	694.5	704
	0.035	711.5	696.5	699.5
	0.036	711	697.5	703.5
	0.037	713.5	695.5	703.5
	0.038	711.5	696.5	704
	0.039	713.5	693.5	703.5
	0.04	713	699	702.5
	0.041	715	697.5	706
	0.042	713	699.5	704.5
	0.043	712.5	699	706.5
	0.044	711.5	698.5	707.5
	0.045	714	701	708
	0.046	712.5	700	701
	0.047	714	700	701
	0.048	711.5	700	706
	0.049	711	699.5	708.5
	0.05	713.5	697.5	705
	0.051	711	699	706
	0.052	713.5	698.5	705.5
	0.053	711	703.5	709.5
	0.054	712	700.5	705.5
	0.055	713.5	699.5	704.5
	0.056	714	700	706
	0.057	712	701	705.5
	0.058	713	700.5	708
	0.059	709.5	701	704.5
	0.06	710	697.5	706.5
	0.061	712	700.5	705.5
	0.062	707	699	709.5
	0.063	709	701	704
	0.064	713.5	701	706
	0.065	710.5	703	705
	0.066	710	700	704.5
	0.067	709.5	699	705
	0.068	707.5	700.5	704.5
	0.069	709	697.5	708
	0.07	708	705.5	703
	0.071	708.5	700	704.5
	0.072	707	702	704
	0.073	709.5	701	703.5
	0.074	709.5	703	703
	0.075	707.5	703	704
	0.076	707.5	702.5	701
	0.077	705.5	702.5	703.5
	0.078	707.5	704.5	703
	0.079	704.5	706	698
	0.08	705.5	701	697.5
	0.081	706	701	700
	0.082	701	703.5	701
	0.083	702.5	703	697.5
	0.084	705	701	700
	0.085	703.5	701	699.5
	0.086	707.5	701	700
	0.087	705.5	707.5	698
	0.088	704.5	702.5	697.5
	0.089	701	702	699.5
	0.09	704	707	696.5
	0.091	703	704.5	696.5
	0.092	701	701	697.5
	0.093	703.5	705.5	700.5
	0.094	704.5	703	697.5
	0.095	704.5	703	693.5
	0.096	698.5	704	697
	0.097	701	704	693.5
	0.098	703	709	696.5
	0.099	701	707	697
	0.1	704.5	707	695
	0.101	706	703.5	695
	0.102	702	708.5	694
	0.103	701	706	694.5
	0.104	697.5	706.5	692.5
	0.105	702.5	708	695
	0.106	701	704.5	690
	0.107	701	710	694.5
	0.108	700	706.5	690
	0.109	701	707.5	691.5
	0.11	699	709.5	690
	0.111	701	710.5	691
	0.112	705	708.5	692
	0.113	700	711	693
	0.114	698	711	691.5
	0.115	697.5	711	690
	0.116	698.5	709	689
	0.117	697.5	709.5	688
	0.118	698	711	686
	0.119	697.5	711	686
	0.12	700	711	691
	0.121	701	712.5	690.5
	0.122	701	710	689
	0.123	700.5	708.5	688.5
	0.124	699	712	689
	0.125	695.5	706.5	690
	0.126	701	710	689.5
	0.127	699	710.5	689
	0.128	697	709.5	688.5
	0.129	698.5	709.5	691
	0.13	696	712.5	691.5
	0.131	697.5	710.5	691.5
	0.132	700.5	711	686
	0.133	698.5	710.5	690.5
	0.134	697	715.5	690
	0.135	699	710	692.5
	0.136	698.5	708.5	694.5
	0.137	697.5	708.5	686
	0.138	699	711	690.5
	0.139	700.5	708.5	691.5
	0.14	695	712.5	690.5
	0.141	695	708	692.5
	0.142	697	704.5	686
	0.143	694	709.5	693
	0.144	697	710	689.5
	0.145	693.5	707.5	692
	0.146	696	710.5	693.5
	0.147	695	704.5	694.5
	0.148	695.5	704.5	695
	0.149	697	708.5	690
	0.15	696.5	708.5	690.5
	0.151	698	709.5	691
	0.152	694	704.5	695
	0.153	696.5	704.5	691.5
	0.154	692.5	704.5	694.5
	0.155	695	704	693
	0.156	696.5	704.5	690.5
	0.157	698.5	703.5	694
	0.158	694.5	706	693
	0.159	696	704.5	694
	0.16	697	705.5	692.5
	0.161	695.5	704.5	696
	0.162	695	704	692
	0.163	696	701	691
	0.164	695.5	701	692
	0.165	693.5	704.5	694
	0.166	692	703	690
	0.167	692.5	701	692
	0.168	694	704.5	689
	0.169	693	701	691.5
	0.17	692.5	701	689.5
	0.171	694	704.5	691.5
	0.172	693.5	703.5	690.5
	0.173	695	702.5	686
	0.174	698.5	701	692.5
	0.175	693	701	692
	0.176	692.5	701	694
	0.177	693	701	691.5
	0.178	694.5	698.5	690.5
	0.179	695	701	694
	0.18	696	701	694
	0.181	694.5	698	696
	0.182	694.5	699.5	690.5
	0.183	693.5	703	690.5
	0.184	690.5	700.5	693.5
	0.185	694.5	700	697.5
	0.186	694	699.5	693.5
	0.187	696	702.5	693
	0.188	695	699	690.5
	0.189	696	701	693
	0.19	696	701	695
	0.191	695.5	697.5	696.5
	0.192	698	701	697
	0.193	694	701	690.5
	0.194	695.5	699.5	690.5
	0.195	697	697.5	694.5
	0.196	692	698.5	694.5
	0.197	697.5	700	690
	0.198	693	699.5	694
	0.199	695.5	701	697.5
	0.2	697.5	699.5	690.5
	0.201	699	698.5	691.5
	0.202	696	700.5	692.5
	0.203	696	697.5	696
	0.204	697	700.5	696.5
	0.205	696.5	701	695
	0.206	696.5	697	697.5
	0.207	695	701	697.5
	0.208	701	701	697.5
	0.209	698.5	703	697
	0.21	699	699.5	698.5
	0.211	697	702.5	695
	0.212	700.5	700.5	695
	0.213	695	699	697.5
	0.214	701	697.5	695
	0.215	699.5	698	699.5
	0.216	699	696	696.5
	0.217	699	698.5	697
	0.218	700.5	701	700
	0.219	698.5	699	698
	0.22	699.5	699	701
	0.221	703	701	701
	0.222	704.5	699	701
	0.223	702	696.5	704
	0.224	701	697	701
	0.225	702	694.5	700.5
	0.226	700	696.5	705.5
	0.227	699.5	695.5	704
	0.228	703.5	696.5	704
	0.229	704	697.5	699.5
	0.23	704.5	695.5	704
	0.231	702.5	693	703
	0.232	704.5	696.5	701
	0.233	704.5	696.5	703.5
	0.234	701	693.5	704
	0.235	703.5	693.5	699.5
	0.236	704.5	694.5	701
	0.237	702.5	694	703.5
	0.238	701	696	704.5
	0.239	703.5	696	704.5
	0.24	704.5	696.5	701
	0.241	700.5	692.5	701
	0.242	702.5	693	700
	0.243	704	694.5	704.5
	0.244	701	693.5	704.5
	0.245	701	696	701
	0.246	705	693	702
	0.247	703.5	694.5	701
	0.248	699	695.5	702.5
	0.249	705.5	691.5	700
	0.25	700.5	695.5	705.5
	0.251	704.5	697.5	701
	0.252	705.5	695	701
	0.253	701	696	701
	0.254	705.5	699	704.5
	0.255	706	692	700
	0.256	705.5	694.5	701
	0.257	706	695.5	699
	0.258	701	696	700
	0.259	703.5	697.5	699.5
	0.26	707.5	697	699
	0.261	703	696.5	701
	0.262	703.5	701	700.5
	0.263	705	696	699.5
	0.264	704.5	701	696.5
	0.265	705.5	701	699
	0.266	705.5	699	697.5
	0.267	708	699.5	700.5
	0.268	704.5	699	696
	0.269	704	697.5	693.5
	0.27	707	699	695.5
	0.271	707	700	697.5
	0.272	710	702.5	696.5
	0.273	704.5	703	697.5
	0.274	707.5	704.5	698
	0.275	706.5	699.5	695
	0.276	708.5	704.5	695
	0.277	709	704.5	695.5
	0.278	708.5	705	695
	0.279	707.5	704.5	695
	0.28	708	701	695
	0.281	707.5	705	693
	0.282	711	703	694.5
	0.283	708	701	690
	0.284	710	703	695
	0.285	710	705.5	691.5
	0.286	711.5	704.5	692.5
	0.287	708.5	701	694
	0.288	708	704.5	695.5
	0.289	712	704.5	692.5
	0.29	708	709	695
	0.291	709	704.5	693.5
	0.292	709	706.5	697.5
	0.293	708.5	704.5	691
	0.294	707	705	690.5
	0.295	710	707.5	693.5
	0.296	710.5	705	694.5
	0.297	706.5	706	696
	0.298	708.5	705.5	693.5
	0.299	709.5	704.5	694
	0.3	709	707.5	697.5
	0.301	706.5	708.5	695.5
	0.302	708.5	705.5	694.5
	0.303	707.5	704.5	696.5
	0.304	710	707	695.5
	0.305	709	706.5	693.5
	0.306	708	704.5	697
	0.307	706.5	704.5	696
	0.308	707.5	708	695.5
	0.309	705	707.5	697.5
	0.31	705.5	703	697.5
	0.311	705.5	705	698
	0.312	705.5	704.5	697.5
	0.313	709	707	696.5
	0.314	707.5	706	698
	0.315	710	703	698
	0.316	707.5	706	701
	0.317	708	703	698.5
	0.318	709.5	703.5	699.5
	0.319	709	706.5	698
	0.32	705.5	707	700
	0.321	705	704	698
	0.322	701	704.5	701
	0.323	706.5	705	699
	0.324	707	705.5	698.5
	0.325	703.5	704.5	699.5
	0.326	706.5	701	696.5
	0.327	704.5	701	698.5
	0.328	706.5	707.5	697.5
	0.329	704.5	704	701
	0.33	707.5	702.5	700
	0.331	705.5	702.5	697.5
	0.332	707	701	698.5
	0.333	706.5	704.5	700
	0.334	707	704.5	699.5
	0.335	704.5	703.5	699.5
	0.336	705	703	700
	0.337	704.5	704.5	697.5
	0.338	705	701	696.5
	0.339	707.5	703	696
	0.34	704.5	700.5	698.5
	0.341	704.5	702.5	697
	0.342	707	704.5	697.5
	0.343	701	700.5	698
	0.344	704	701	699
	0.345	701	703	699.5
	0.346	701	699.5	701
	0.347	701	700.5	699
	0.348	703.5	702.5	701
	0.349	704.5	700	697
	0.35	702.5	700	697.5
	0.351	704.5	701	699.5
	0.352	704.5	698.5	700
	0.353	703	697.5	697.5
	0.354	701	700	698
	0.355	702.5	701	698
	0.356	703.5	698	700.5
	0.357	701	697.5	696.5
	0.358	704	700.5	696.5
	0.359	701	697.5	695.5
	0.36	703.5	698.5	699.5
	0.361	702.5	695.5	698
	0.362	702.5	700.5	697
	0.363	699.5	698	699
	0.364	701	694.5	698
	0.365	697.5	693.5	700
	0.366	699	699.5	698.5
	0.367	701	697.5	697.5
	0.368	699	696.5	699.5
	0.369	699	698	698.5
	0.37	701	699.5	700.5
	0.371	696.5	696	700
	0.372	697.5	695	700.5
	0.373	700	696.5	697.5
	0.374	698	698.5	697
	0.375	696	698.5	697.5
	0.376	700	697.5	697.5
	0.377	700	692	700.5
	0.378	699	691.5	697.5
	0.379	702.5	694.5	699
	0.38	700.5	699	697.5
	0.381	697.5	697.5	699
	0.382	697	696	697.5
	0.383	699	697	698
	0.384	697	694.5	695.5
	0.385	697.5	697	696
	0.386	699	698	697.5
	0.387	698	697.5	698
	0.388	698	695.5	698.5
	0.389	696	697	700
	0.39	699.5	693	696.5
	0.391	697	696	697.5
	0.392	700	693.5	696
	0.393	700.5	696	699.5
	0.394	697.5	695	700
	0.395	698	696.5	695.5
	0.396	700	694.5	697
	0.397	697.5	697.5	698
	0.398	700	695	696
	0.399	697.5	698	698
	0.4	703.5	695.5	698.5
	0.401	698	698.5	695.5
	0.402	701	699	699.5
	0.403	700.5	696.5	698.5
	0.404	697.5	699	699
	0.405	700	697.5	697
	0.406	697	697	696.5
	0.407	697	698.5	695
	0.408	696	698	701
	0.409	700	697.5	697.5
	0.41	700.5	701	698.5
	0.411	698	701	697
	0.412	697.5	699	696
	0.413	698.5	700	697.5
	0.414	700.5	701	699
	0.415	698.5	701	699.5
	0.416	701	703.5	699.5
	0.417	696	704	696
	0.418	699	698.5	703.5
	0.419	701	700.5	699.5
	0.42	700.5	701	695
	0.421	700.5	699	703
	0.422	697.5	705.5	700
	0.423	701	697.5	697.5
	0.424	700	705.5	697.5
	0.425	699.5	704.5	700
	0.426	700	704.5	700.5
	0.427	698	698.5	701
	0.428	699	704.5	699
	0.429	704	701	702.5
	0.43	698.5	704	700.5
	0.431	701	704.5	701
	0.432	701	706	701
	0.433	700.5	703.5	703
	0.434	701	703.5	703.5
	0.435	704.5	706	701
	0.436	701	701	701
	0.437	701	701	702.5
	0.438	701	701	698
	0.439	698.5	704	702
	0.44	699.5	701	702.5
	0.441	700.5	704.5	701
	0.442	701	702	704.5
	0.443	700	699.5	700.5
	0.444	700.5	703.5	702
	0.445	701	702.5	700.5
	0.446	701	701	706
	0.447	697.5	702.5	702
	0.448	698	701	699
	0.449	700.5	700	704.5
	0.45	701	702.5	698.5
	0.451	699	701	697.5
	0.452	699	702	701
	0.453	700	702.5	701
	0.454	701	701	699
	0.455	703	703	701
	0.456	701	699.5	697.5
	0.457	701	699.5	699
	0.458	701	699.5	696.5
	0.459	700.5	697	700.5
	0.46	701	699	702.5
	0.461	701	701	701
	0.462	704.5	701	702
	0.463	701	697.5	701
	0.464	699	699.5	701
	0.465	703	701	700
	0.466	702	700	699.5
	0.467	704	701	697.5
	0.468	699	699	701
	0.469	704.5	697.5	699.5
	0.47	701	700	699
	0.471	701	701	699.5
	0.472	699.5	700.5	699.5
	0.473	707.5	697.5	697.5
	0.474	705	699	698.5
	0.475	701	701	698
	0.476	704.5	702	697.5
	0.477	704.5	698.5	697.5
	0.478	708	700.5	697.5
	0.479	703	699	697.5
	0.48	703.5	698.5	700
	0.481	704	701	697
	0.482	705	699.5	695.5
	0.483	705.5	697.5	701
	0.484	701	701	698.5
	0.485	703.5	698	695.5
	0.486	704.5	701	701
	0.487	706	696.5	697.5
	0.488	706	699.5	698.5
	0.489	706	701	697.5
	0.49	708	700	697.5
	0.491	707.5	700	700
	0.492	705	700	700
	0.493	704	700.5	698
	0.494	707.5	700.5	698.5
	0.495	704.5	699.5	696.5
	0.496	705.5	705	698.5
	0.497	707	700.5	697.5
	0.498	705	701	697.5
	0.499	707.5	704.5	701
	0.5	705.5	700	702.5
	0.501	711	700	701
	0.502	708	703	701
	0.503	710.5	705.5	700.5
	0.504	704	708	698
	0.505	708.5	703	698.5
	0.506	708	704.5	695.5
	0.507	707.5	703.5	699
	0.508	709.5	705.5	700
	0.509	705.5	705	701
	0.51	711.5	704.5	697.5
	0.511	709.5	699.5	699.5
	0.512	711	704.5	699.5
	0.513	709.5	704.5	697
	0.514	711	701	698
	0.515	708	705	699
	0.516	708.5	703.5	703
	0.517	711	706.5	699.5
	0.518	708	704.5	696.5
	0.519	709.5	704.5	701
	0.52	706.5	705.5	701
	0.521	712	703	700
	0.522	711	703	700.5
	0.523	707	704	698.5
	0.524	711	706.5	698.5
	0.525	712	703	699
	0.526	711.5	705.5	697.5
	0.527	711	704	700.5
	0.528	712	701	699.5
	0.529	711	706	697
	0.53	711	704.5	698
	0.531	712	705	699.5
	0.532	711	706	703
	0.533	710.5	705	697.5
	0.534	713	702.5	702.5
	0.535	713	701	697.5
	0.536	710	705	701
	0.537	711.5	705	703.5
	0.538	712	703	704
	0.539	708	703.5	704.5
	0.54	714.5	703.5	699
	0.541	710	704.5	702
	0.542	709.5	703.5	701
	0.543	712	704.5	703
	0.544	709.5	701	701
	0.545	708.5	701	701
	0.546	707	704.5	703
	0.547	711	704	701
	0.548	711	700	701
	0.549	709.5	699.5	703
	0.55	708.5	699	704.5
	0.551	711	699.5	704.5
	0.552	709.5	698.5	704
	0.553	711	701	704.5
	0.554	712	703	705
	0.555	707	697.5	703
	0.556	706.5	701	708
	0.557	707	700	705
	0.558	707.5	700.5	707
	0.559	708.5	696	704.5
	0.56	708	701	702
	0.561	708.5	701	705
	0.562	707	699	704.5
	0.563	708.5	699.5	707.5
	0.564	710	701	704
	0.565	706	699	707.5
	0.566	709.5	699	705.5
	0.567	708.5	702	704.5
	0.568	705	697.5	704.5
	0.569	706.5	701	706.5
	0.57	701	700.5	704
	0.571	704.5	701	704.5
	0.572	703.5	698.5	702.5
	0.573	704	700.5	704.5
	0.574	703.5	697	703
	0.575	706	699.5	702.5
	0.576	701	701.5	700.5
	0.577	701	698	700.5
	0.578	700.5	701	702.5
	0.579	701	699	703
	0.58	704	700	702
	0.581	702	700.5	699
	0.582	704	700	701
	0.583	700	698.5	700
	0.584	703	701	701
	0.585	701	701	699
	0.586	698.5	703.5	696.5
	0.587	700	701	702
	0.588	700	698	700.5
	0.589	699	700.5	697
	0.59	702	701	696.5
	0.591	701	701	697.5
	0.592	703.5	704	697
	0.593	700	701	697.5
	0.594	700	704.5	697.5
	0.595	698.5	700.5	698.5
	0.596	699.5	701	697
	0.597	701	704.5	692.5
	0.598	698.5	704	695.5
	0.599	699.5	700	695.5
	0.6	698	702	694
	0.601	696.5	701	697.5
	0.602	700.5	703.5	695
	0.603	697	702	691.5
	0.604	699	704.5	694
	0.605	702.5	703.5	694.5
	0.606	698	703	693.5
	0.607	694.5	704.5	695.5
	0.608	695.5	704.5	697.5
	0.609	699	701	692.5
	0.61	698.5	701	691
	0.611	696.5	703	693.5
	0.612	697	697.5	695.5
	0.613	699	698.5	691.5
	0.614	698.5	700	691
	0.615	698	697	694.5
	0.616	701	699.5	697
	0.617	700	701	696.5
	0.618	699	703	691.5
	0.619	701	700.5	695.5
	0.62	700	701	693.5
	0.621	698	699	691
	0.622	698	701	696.5
	0.623	696.5	700	695.5
	0.624	698.5	703	695
	0.625	698	698	694.5
	0.626	699.5	703.5	697.5
	0.627	698	700.5	694.5
	0.628	697.5	697.5	692
	0.629	701	701	696.5
	0.63	698.5	700	692
	0.631	700.5	699	694.5
	0.632	699	701	696
	0.633	700	700	693.5
	0.634	701	698.5	691
	0.635	700.5	695	691
	0.636	698.5	695	698
	0.637	701	698.5	691
	0.638	699	696	697.5
	0.639	698.5	697.5	695
	0.64	700	698	692.5
	0.641	704	698	696.5
	0.642	700.5	701	693.5
	0.643	698	701	690.5
	0.644	701	697	694.5
	0.645	700	696.5	696
	0.646	700	699	691.5
	0.647	704	697.5	694.5
	0.648	701	699	696
	0.649	701	697.5	693.5
	0.65	701	700.5	693
	0.651	701	701	694
	0.652	704.5	697.5	694
	0.653	703	703	694.5
	0.654	704	695	692
	0.655	703	699	691.5
	0.656	705	699	693
	0.657	702	699	695.5
	0.658	700	699.5	695
	0.659	701	700.5	694.5
	0.66	705.5	697	692
	0.661	702.5	698.5	693.5
	0.662	702.5	701	693
	0.663	702.5	703	694.5
	0.664	705	700	692.5
	0.665	704.5	702	690.5
	0.666	704.5	701	692
	0.667	704.5	699	692
	0.668	701	700.5	689
	0.669	700.5	703	690
	0.67	701	702	688.5
	0.671	703	700	690
	0.672	701	701	689
	0.673	704.5	702.5	690
	0.674	706.5	699.5	686
	0.675	704.5	700.5	686
	0.676	703	698.5	688.5
	0.677	704	700	686
	0.678	703	703.5	686
	0.679	701	704	686
	0.68	705	704.5	688.5
	0.681	706	702.5	690.5
	0.682	706.5	707	686
	0.683	705.5	703.5	684
	0.684	703.5	703.5	688.5
	0.685	705	701	690.5
	0.686	703.5	703.5	690.5
	0.687	704.5	704.5	686
	0.688	704.5	703	685
	0.689	704.5	701	686
	0.69	704.5	701	686
	0.691	705	703	690.5
	0.692	705.5	701	692.5
	0.693	707	701	690.5
	0.694	708.5	701	688.5
	0.695	708.5	702	692.5
	0.696	706	702.5	690.5
	0.697	707.5	705.5	691
	0.698	709.5	705	689.5
	0.699	708	702.5	693.5
	0.7	706	700	691
	0.701	704.5	704.5	692.5
	0.702	707.5	703.5	690.5
	0.703	708.5	703	692
	0.704	704.5	703	693
	0.705	709.5	701	692
	0.706	708	700	694.5
	0.707	707.5	702	697.5
	0.708	708	701	697.5
	0.709	706	706.5	695
	0.71	709.5	704.5	696
	0.711	707.5	703	696.5
	0.712	711	705.5	697.5
	0.713	710.5	703.5	697
	0.714	711	704.5	700
	0.715	710	705	699.5
	0.716	710	701	698.5
	0.717	712	700.5	700
	0.718	707.5	704	703.5
	0.719	711	702.5	703
	0.72	711	703.5	703
	0.721	710	703.5	701
	0.722	711	701	701
	0.723	712	700.5	705.5
	0.724	710	703.5	703.5
	0.725	708	704.5	707.5
	0.726	711	701	704.5
	0.727	711	703.5	706.5
	0.728	711	704	701
	0.729	713.5	701	705.5
	0.73	713	705	705.5
	0.731	712	704	706.5
	0.732	711	701	707
	0.733	709	703	707.5
	0.734	712	702.5	705.5
	0.735	711.5	706	708.5
	0.736	712.5	704	703.5
	0.737	712	704.5	707
	0.738	715	704.5	704.5
	0.739	709.5	705	705.5
	0.74	713	703.5	701
	0.741	712.5	704	707
	0.742	709.5	706	703.5
	0.743	712	705.5	704.5
	0.744	711	704.5	704.5
	0.745	709	701	701
	0.746	713.5	704	705.5
	0.747	711.5	704.5	701
	0.748	711.5	706.5	704.5
	0.749	710	705	705
	0.75	711.5	708	703.5
	0.751	710	704	704.5
	0.752	709	706	703.5
	0.753	708.5	704.5	705
	0.754	709.5	707	698
	0.755	708.5	705.5	703.5
	0.756	710.5	704.5	702.5
	0.757	706	706.5	701
	0.758	708.5	704.5	699.5
	0.759	709.5	706	703.5
	0.76	703.5	707	704
	0.761	707.5	701	700
	0.762	707	705	699
	0.763	706.5	704.5	698
	0.764	706.5	707	698.5
	0.765	705.5	704	701
	0.766	704.5	703	699.5
	0.767	704	704	699.5
	0.768	706	703.5	700
	0.769	706.5	701	698
	0.77	708	704.5	696
	0.771	708	705	698
	0.772	705	704.5	695.5
	0.773	706	701	698
	0.774	706.5	702	697
	0.775	704.5	703.5	699
	0.776	701	701	696.5
	0.777	703.5	702.5	694.5
	0.778	704	701	697.5
	0.779	704.5	705.5	697
	0.78	704	702.5	697
	0.781	703.5	701	696.5
	0.782	707	701	699
	0.783	704.5	702.5	695
	0.784	703.5	699.5	694.5
	0.785	703	699	694.5
	0.786	708	703	701
	0.787	703.5	698.5	698
	0.788	705	704	697.5
	0.789	706.5	701	695
	0.79	704	697.5	695
	0.791	705	697	692.5
	0.792	704	701	695
	0.793	706.5	700	693.5
	0.794	706	703	699
	0.795	703	699	699
	0.796	704.5	701	698
	0.797	700	699	698
	0.798	705	700	697.5
	0.799	701	699.5	697.5
	0.8	704.5	700.5	700
	0.801	701	700.5	696
	0.802	703	700.5	698
	0.803	704.5	699	697.5
	0.804	701	702	698
	0.805	704	701	697.5
	0.806	703.5	700	701
	0.807	703.5	701	700.5
	0.808	700.5	701	701
	0.809	704	701	698
	0.81	700.5	700.5	699.5
	0.811	705	699.5	698
	0.812	704.5	696.5	698.5
	0.813	705.5	701	698
	0.814	701	699	701
	0.815	703	695.5	698
	0.816	700	701	703
	0.817	699.5	700	697.5
	0.818	701	699.5	700
	0.819	704.5	700.5	698
	0.82	701	698	697.5
	0.821	704.5	698.5	695.5
	0.822	701	699	698
	0.823	703	698	701
	0.824	702.5	698	699
	0.825	701	701	699.5
	0.826	702.5	699	699
	0.827	701	703.5	696
	0.828	701	698.5	698
	0.829	700	700	701
	0.83	701	701	700
	0.831	699.5	700.5	697.5
	0.832	703.5	702	698
	0.833	701	700.5	691
	0.834	703	701	695.5
	0.835	705	699.5	698
	0.836	698	698.5	694
	0.837	700.5	699.5	695
	0.838	700.5	700	695
	0.839	702.5	703.5	696.5
	0.84	703	700.5	695.5
	0.841	697.5	701	695
	0.842	701	701	693.5
	0.843	701	698	693
	0.844	700	703	691.5
	0.845	701	701	690.5
	0.846	700.5	698.5	692.5
	0.847	698.5	700.5	694.5
	0.848	701	699.5	694.5
	0.849	704	702	693
	0.85	701	699	691.5
	0.851	700	701	693
	0.852	701	701	697
	0.853	701	696.5	694
	0.854	701	704.5	691
	0.855	700	697	694
	0.856	700.5	699	691.5
	0.857	701	701	695
	0.858	701	701	692.5
	0.859	701	703.5	693.5
	0.86	700.5	701	694
	0.861	702.5	699	693.5
	0.862	702	701	690
	0.863	699	700	692.5
	0.864	700.5	700.5	692
	0.865	703	701	690.5
	0.866	701	701	692.5
	0.867	704.5	699.5	689.5
	0.868	701	701	694
	0.869	704	697.5	693.5
	0.87	701	703.5	691.5
	0.871	704.5	700.5	690.5
	0.872	703.5	703	692
	0.873	699	700	694.5
	0.874	703.5	700	690.5
	0.875	701	703.5	690.5
	0.876	704.5	699	692
	0.877	703	697.5	691
	0.878	706	700.5	691.5
	0.879	701	703	686
	0.88	705	704	693.5
	0.881	705	703.5	693
	0.882	702	701	693.5
	0.883	703	701	690
	0.884	703.5	701	692.5
	0.885	704	700.5	694
	0.886	705.5	704.5	694
	0.887	701	703	694.5
	0.888	705.5	705.5	692.5
	0.889	704.5	703	694
	0.89	705.5	704.5	693
	0.891	705.5	704.5	696
	0.892	701	705.5	696
	0.893	706.5	704.5	695
	0.894	701	701	693.5
	0.895	703.5	703.5	695
	0.896	703.5	701	697.5
	0.897	703	701	698.5
	0.898	701	705.5	694.5
	0.899	703.5	704.5	696.5
	0.9	703.5	703	698.5
	0.901	704.5	705	700
	0.902	703.5	704	697.5
	0.903	701	706	697.5
	0.904	701	701	700
	0.905	705.5	700.5	699.5
	0.906	699.5	704.5	704
	0.907	704	704	700.5
	0.908	705	705.5	701
	0.909	706	701	704.5
	0.91	701	705	705
	0.911	703.5	705	705.5
	0.912	707	704.5	704.5
	0.913	704.5	704	703.5
	0.914	704.5	704	703
	0.915	705.5	704.5	704
	0.916	708.5	706	700.5
	0.917	707.5	706	707
	0.918	700.5	702.5	708.5
	0.919	706.5	704.5	707.5
	0.92	705.5	705	705
	0.921	705	704.5	706.5
	0.922	704	707.5	707.5
	0.923	704.5	705.5	703
	0.924	704.5	701	710.5
	0.925	706	706	704.5
	0.926	704	703.5	704.5
	0.927	704.5	702.5	707
	0.928	704.5	704.5	707
	0.929	701	704	705
	0.93	708.5	703.5	705.5
	0.931	704.5	701	707
	0.932	706.5	707	708.5
	0.933	706	705	702.5
	0.934	707.5	703.5	704.5
	0.935	706.5	700.5	707
	0.936	706	704.5	704.5
	0.937	706.5	703	705.5
	0.938	707	702	707.5
	0.939	705.5	704.5	705.5
	0.94	703.5	703.5	701
	0.941	707	700.5	704
	0.942	703.5	701	703
	0.943	708	705	703.5
	0.944	704	704	706
	0.945	704.5	702.5	705.5
	0.946	705	704	704.5
	0.947	705	704.5	705.5
	0.948	704.5	701	703
	0.949	706	701	703.5
	0.95	705	701	701
	0.951	707.5	701	704.5
	0.952	706	704.5	701
	0.953	705.5	702.5	701
	0.954	706	701	704
	0.955	706.5	702.5	701
	0.956	703.5	703	700.5
	0.957	701	700	699.5
	0.958	705.5	703	700
	0.959	704.5	699.5	701
	0.96	701	700.5	701
	0.961	702.5	707	701
	0.962	703	699	699.5
	0.963	702	701	699.5
	0.964	701	701	699
	0.965	701	703	701
	0.966	701	700.5	698
	0.967	699	703	699.5
	0.968	701	702.5	698
	0.969	704	703.5	692.5
	0.97	704.5	703.5	699.5
	0.971	699.5	701	700
	0.972	701	701	701
	0.973	704.5	699.5	698
	0.974	701	700.5	697
	0.975	706	701	698.5
	0.976	704.5	703	701
	0.977	704	701	700.5
	0.978	701	699.5	703
	0.979	702.5	703	697.5
	0.98	701	697.5	698.5
	0.981	701	701	698
	0.982	703.5	699	698.5
	0.983	704.5	700.5	697.5
	0.984	701	701	696
	0.985	703.5	701	697.5
	0.986	701	698	700
	0.987	704.5	701	699
	0.988	703	702	698
	0.989	702.5	699.5	699.5
	0.99	701	697	695.5
	0.991	707	699	699
	0.992	704	697.5	700
	0.993	699.5	701	697
	0.994	701	701	699
	0.995	704.5	701	697
	0.996	700.5	700	697.5
	0.997	705.5	699	699
	0.998	701	701	701
	0.999	703	701	698
	1	701	697.5	697
	1.001	707	700	700
	1.002	703	699	698
	1.003	707.5	701	704
	1.004	702.5	700	696
	1.005	703	698.5	697.5
	1.006	705	702.5	701
	1.007	704.5	703	697
	1.008	706	701	701
	1.009	705	699.5	704
	1.01	708	699.5	701
	1.011	710.5	699.5	701
	1.012	709	701	697.5
	1.013	707.5	701	698
	1.014	705.5	700.5	699
	1.015	707.5	697.5	698
	1.016	706.5	701	699.5
	1.017	705.5	699	700
	1.018	706	700	697.5
	1.019	705.5	704.5	700
	1.02	709.5	698.5	697
	1.021	707.5	702.5	698
	1.022	707	701	699
	1.023	704.5	697.5	698
	1.024	708	701	700.5
	1.025	708	699.5	698
	1.026	710	696.5	696
	1.027	709.5	700	701
	1.028	709.5	699	699
	1.029	706.5	699	699.5
	1.03	713.5	704.5	697.5
	1.031	706.5	704	698.5
	1.032	707	701	697.5
	1.033	708.5	701	694.5
	1.034	710.5	703	697.5
	1.035	713	703.5	697.5
	1.036	708.5	701	696
	1.037	709.5	703.5	697.5
	1.038	713	702.5	696.5
	1.039	709.5	704	693.5
	1.04	710.5	701	697.5
	1.041	710	703	696
	1.042	708.5	701	694.5
	1.043	711	700.5	694
	1.044	710.5	701	692
	1.045	711	698	697.5
	1.046	711	701	693
	1.047	709	700.5	694
	1.048	711	701	692.5
	1.049	708.5	702	695.5
	1.05	707.5	701	693
	1.051	706.5	703.5	695.5
	1.052	707.5	701	691.5
	1.053	710.5	698	696
	1.054	711	703.5	692
	1.055	710.5	704.5	691.5
	1.056	708.5	704	690.5
	1.057	711	699.5	695.5
	1.058	709.5	703	693.5
	1.059	709.5	701	696.5
	1.06	706	701	694.5
	1.061	705.5	700	697.5
	1.062	708.5	701	693.5
	1.063	708.5	699.5	695.5
	1.064	707	703.5	692.5
	1.065	706.5	703	696
	1.066	709	699	693.5
	1.067	708.5	699	696.5
	1.068	706	703.5	697.5
	1.069	704.5	699	695.5
	1.07	702.5	701	694
	1.071	706	700.5	693
	1.072	705.5	701	695.5
	1.073	708	698.5	697.5
	1.074	701	701	696
	1.075	708.5	699.5	700.5
	1.076	703	700.5	697
	1.077	704.5	700.5	696.5
	1.078	703	702	697
	1.079	706	697.5	699.5
	1.08	705	701	697
	1.081	702.5	703.5	697.5
	1.082	704	701	697.5
	1.083	703	703	697.5
	1.084	705	700.5	697.5
	1.085	700	702.5	697.5
	1.086	705.5	698.5	700
	1.087	701	701	695
	1.088	701	701	698.5
	1.089	699.5	700	697.5
	1.09	704.5	698.5	697
	1.091	700.5	700	695.5
	1.092	704.5	700	694.5
	1.093	702.5	705	697.5
	1.094	704	701	696.5
	1.095	699.5	699.5	695.5
	1.096	702	703	699
	1.097	699.5	699	698.5
	1.098	696.5	701	697.5
	1.099	700.5	699	695
	1.1	699.5	704.5	697
	1.101	699	704.5	694.5
	1.102	700.5	703	698.5
	1.103	702.5	701	699.5
	1.104	700.5	700	695
	1.105	698	703	694.5
	1.106	698	701	692.5
	1.107	700.5	698.5	691.5
	1.108	701	703.5	696.5
	1.109	698	705.5	692.5
	1.11	698	703.5	696.5
	1.111	701	704.5	695.5
	1.112	703	704	693.5
	1.113	701	704	695.5
	1.114	700.5	704.5	693.5
	1.115	702.5	705	693.5
	1.116	701	706	692
	1.117	700.5	704	693.5
	1.118	701	706.5	694
	1.119	700	704	693
	1.12	701	705.5	695.5
	1.121	701	704.5	690.5
	1.122	700.5	706.5	693.5
	1.123	699	704.5	692.5
	1.124	701	704	690.5
	1.125	704.5	704	689.5
	1.126	701	704.5	690
	1.127	703	706	690
	1.128	700.5	705.5	690.5
	1.129	698	706	691
	1.13	703	706.5	695
	1.131	703.5	699	695
	1.132	704.5	702.5	692.5
	1.133	698	705.5	692
	1.134	699	704	688.5
	1.135	704	704	691.5
	1.136	700.5	705	694
	1.137	700.5	701	693
	1.138	700.5	705	692
	1.139	700.5	702.5	690
	1.14	703.5	704	692
	1.141	701	704.5	691.5
	1.142	704.5	704.5	690
	1.143	699	701	691.5
	1.144	700.5	705	689
	1.145	704.5	703.5	692
	1.146	703.5	705	689
	1.147	703	703.5	691
	1.148	703.5	703	693.5
	1.149	705.5	700.5	690.5
	1.15	703	704.5	691
	1.151	705.5	705	690.5
	1.152	700.5	702	692
	1.153	704.5	705	686
	1.154	705.5	700	692.5
	1.155	702.5	701	692
	1.156	704	700.5	692.5
	1.157	705	699.5	695.5
	1.158	703.5	700	693.5
	1.159	704.5	705	695
	1.16	704.5	701	693.5
	1.161	705	706.5	692.5
	1.162	702.5	701	696.5
	1.163	701	701	693
	1.164	701	704	695
	1.165	701	701	695.5
	1.166	701	701	695
	1.167	703	697.5	696
	1.168	700.5	701	697
	1.169	705	703.5	695.5
	1.17	704	699	698
	1.171	704.5	699.5	697
	1.172	701	703.5	696.5
	1.173	701	703	695.5
	1.174	701	697.5	695
	1.175	701	699	698
	1.176	703.5	696.5	696.5
	1.177	700	698.5	697
	1.178	702	699	700
	1.179	705	700.5	697.5
	1.18	700.5	700	699
	1.181	701	701	699
	1.182	701	700	698
	1.183	701	698.5	701
	1.184	701	699.5	696.5
	1.185	703.5	701	699.5
	1.186	704.5	700.5	700
	1.187	701	703	700
	1.188	701	696.5	698
	1.189	701	701	701
	1.19	703	697	699
	1.191	702.5	698.5	704
	1.192	700	699	700
	1.193	700.5	699	701
	1.194	704	699.5	698
	1.195	702.5	704.5	698
	1.196	700	699	699
	1.197	700.5	700	701
	1.198	700.5	698	701
	1.199	700.5	704.5	700
	1.2	705.5	700.5	701
	1.201	700.5	701	697.5
	1.202	701	698	698
	1.203	704.5	700.5	702.5
	1.204	700.5	701	701
	1.205	704.5	701	703
	1.206	701	698	701
	1.207	700.5	703.5	702
	1.208	701	700	698.5
	1.209	703.5	700.5	700
	1.21	703.5	698	701
	1.211	702.5	698.5	696.5
	1.212	704	699	703
	1.213	704	700.5	701
	1.214	701	698.5	701
	1.215	703.5	701	701
	1.216	701	698.5	702
	1.217	707	703.5	700.5
	1.218	704	700.5	702.5
	1.219	703	701	704.5
	1.22	704	700	701
	1.221	704.5	700	706
	1.222	701	699.5	703.5
	1.223	704.5	700	698.5
	1.224	704.5	703.5	703
	1.225	705.5	701	698
	1.226	704.5	701	706.5
	1.227	701	703	706.5
	1.228	703	700	700.5
	1.229	701	699	701
	1.23	707	697.5	703.5
	1.231	701	698.5	703
	1.232	706.5	699.5	704.5
	1.233	706	701	704
	1.234	707	698	702.5
	1.235	706	697.5	707
	1.236	702.5	702.5	703.5
	1.237	705	697.5	703
	1.238	705.5	700.5	704
	1.239	704	699	700
	1.24	705	698.5	703
	1.241	708.5	699	703.5
	1.242	707	699.5	705.5
	1.243	707	699	703
	1.244	704.5	697.5	704
	1.245	708.5	698.5	706
	1.246	709.5	697.5	705
	1.247	703.5	697	704.5
	1.248	709.5	699	703.5
	1.249	706.5	697	701.5
	1.25	707	700	704.5
	1.251	707.5	701	701
	1.252	710.5	697	701
	1.253	710	700.5	701
	1.254	707	701	703.5
	1.255	706.5	700	703.5
	1.256	707.5	697	707
	1.257	711	698	707.5
	1.258	707.5	699	703
	1.259	706.5	699.5	701
	1.26	707.5	697.5	700.5
	1.261	707.5	698	704.5
	1.262	707	696.5	706.5
	1.263	708	699	702
	1.264	703.5	696.5	702.5
	1.265	706.5	700	703.5
	1.266	708	695	702
	1.267	707	697	703.5
	1.268	708	700	703.5
	1.269	706	699	701
	1.27	704.5	696.5	700.5
	1.271	709.5	698	701
	1.272	708.5	697.5	699
	1.273	706	699.5	701
	1.274	708	698.5	701
	1.275	706	701	699
	1.276	708.5	697	704
	1.277	709.5	698	700
	1.278	707.5	697.5	701
	1.279	708.5	698.5	700
	1.28	704.5	695	698
	1.281	706.5	694.5	700.5
	1.282	706.5	697.5	701
	1.283	704.5	696	699
	1.284	705	697.5	695.5
	1.285	705	697.5	698.5
	1.286	708	695.5	697.5
	1.287	706.5	696.5	701
	1.288	706	698.5	697
	1.289	706	697.5	696
	1.29	704.5	695.5	696
	1.291	704.5	695.5	700.5
	1.292	704.5	694.5	699
	1.293	705.5	698.5	697.5
	1.294	701	695.5	697.5
	1.295	708	698	693
	1.296	702.5	698.5	697.5
	1.297	705.5	696	697.5
	1.298	708	699	698
	1.299	704	694.5	697
	1.3	706.5	696.5	695
	1.301	704.5	700	697.5
	1.302	704.5	698	694
	1.303	701	698	695.5
	1.304	704	697.5	697.5
	1.305	706.5	698	695.5
	1.306	705	700	692
	1.307	704.5	693.5	693
	1.308	704.5	697	695
	1.309	704.5	697.5	695
	1.31	706	696.5	696
	1.311	702.5	697	694
	1.312	704.5	697.5	692.5
	1.313	701	698.5	693.5
	1.314	705	697	694.5
	1.315	703.5	695.5	695.5
	1.316	705.5	698	694.5
	1.317	703.5	698	692
	1.318	703.5	697	693
	1.319	703	701	693
	1.32	704.5	697.5	692
	1.321	707	700	695
	1.322	704	700	697
	1.323	703.5	697.5	697
	1.324	705	696.5	695.5
	1.325	704.5	697.5	697
	1.326	701	697.5	694.5
	1.327	705	699.5	696.5
	1.328	703.5	698	695.5
	1.329	703.5	703	692.5
	1.33	706	698.5	696.5
	1.331	701	698.5	696.5
	1.332	705.5	703	697.5
	1.333	703	698	696
	1.334	704	696.5	697
	1.335	703	701	696
	1.336	704	699.5	698
	1.337	704.5	699	695.5
	1.338	705.5	704.5	697
	1.339	704.5	698	694
	1.34	701	701	696
	1.341	704	702.5	694
	1.342	706	701	697
	1.343	701	700	694
	1.344	702	703.5	696.5
	1.345	703.5	701	691
	1.346	702.5	703.5	699
	1.347	701	702.5	696.5
	1.348	701	703	697.5
	1.349	700	700.5	697
	1.35	704	699	697
	1.351	702.5	703.5	694.5
	1.352	704.5	699	695
	1.353	701	704.5	697.5
	1.354	706	702.5	698
	1.355	700	699.5	696
	1.356	701	704	695
	1.357	704.5	703	694.5
	1.358	704	700.5	695.5
	1.359	701	702.5	694.5
	1.36	704	704	695.5
	1.361	704.5	701	698
	1.362	703	701	696
	1.363	704.5	704.5	696
	1.364	701	701	698
	1.365	703	704	699.5
	1.366	704	700.5	696
	1.367	703	701	697
	1.368	701	700	701
	1.369	703.5	700.5	697.5
	1.37	701	698.5	698.5
	1.371	701	701	695
	1.372	704	701	695.5
	1.373	705.5	705.5	698.5
	1.374	703.5	701	697.5
	1.375	704.5	701	694
	1.376	704.5	701	692.5
	1.377	703.5	700	697.5
	1.378	704.5	701	694.5
	1.379	704	701	697.5
	1.38	701	700	697.5
	1.381	706	704.5	700.5
	1.382	701	701	697.5
	1.383	703	701	697
	1.384	705	699.5	697.5
	1.385	701	704.5	701
	1.386	703	701	699
	1.387	706	704	699.5
	1.388	704.5	700	694.5
	1.389	706	703	699.5
	1.39	699.5	702.5	697
	1.391	702.5	701	696.5
	1.392	706	704	695.5
	1.393	701	702.5	698
	1.394	704.5	705.5	700
	1.395	704.5	700.5	698
	1.396	703	702	698.5
	1.397	701	703	697.5
	1.398	707.5	703.5	699
	1.399	705.5	704	698
	1.4	703.5	701	697
	1.401	704	704	697.5
	1.402	704.5	704.5	699
	1.403	704	703	694
	1.404	708	704.5	698
	1.405	705.5	704.5	701
	1.406	703.5	699	697.5
	1.407	702.5	704	698
	1.408	704.5	704.5	696.5
	1.409	705	701	701
	1.41	706	703.5	698
	1.411	701	704	696
	1.412	706.5	701	695.5
	1.413	702.5	704	696
	1.414	703	702.5	702.5
	1.415	703.5	701	698
	1.416	705.5	703	697.5
	1.417	700.5	703	699
	1.418	703.5	703	700
	1.419	703	702.5	701
	1.42	706	701	696.5
	1.421	703.5	705.5	701
	1.422	704.5	706	699.5
	1.423	704.5	704.5	698
	1.424	704	701	698.5
	1.425	701	703	695.5
	1.426	705	703.5	697
	1.427	703.5	701	699.5
	1.428	706	699.5	696.5
	1.429	704.5	702	697.5
	1.43	705	704.5	701
	1.431	701	701	694.5
	1.432	703	701	699
	1.433	705	702	696.5
	1.434	705	703	697.5
	1.435	701	701	699.5
	1.436	706.5	699.5	699.5
	1.437	705	702.5	698
	1.438	703	701	693.5
	1.439	705	704	697.5
	1.44	705.5	701	698.5
	1.441	704.5	701	701
	1.442	705	701	697.5
	1.443	706.5	701	698
	1.444	705	703	697.5
	1.445	704	707.5	694.5
	1.446	706	705	696
	1.447	703	701	697.5
	1.448	704.5	698	697.5
	1.449	703.5	700.5	698.5
	1.45	700	705	697
	1.451	704.5	703	697
	1.452	703	703	697
	1.453	705	701	696.5
	1.454	704.5	700	692
	1.455	706.5	704	698
	1.456	705.5	697.5	696
	1.457	704.5	700	693
	1.458	706.5	703	699.5
	1.459	704.5	704.5	695.5
	1.46	705	700	698.5
	1.461	704.5	702.5	696.5
	1.462	708.5	702.5	697
	1.463	703.5	701	698.5
	1.464	704.5	702	695.5
	1.465	708.5	701	697.5
	1.466	708	704.5	698.5
	1.467	704.5	703.5	695.5
	1.468	705	701	696.5
	1.469	705.5	701	695.5
	1.47	705	704.5	696
	1.471	701	698	697.5
	1.472	703.5	703	698
	1.473	705.5	700.5	694
	1.474	704.5	702.5	693.5
	1.475	706	701	699
	1.476	705	701	693
	1.477	706.5	698	697.5
	1.478	704	700	693.5
	1.479	704.5	700	695
	1.48	705	701	695.5
	1.481	705	697.5	693.5
	1.482	706.5	701	695.5
	1.483	705.5	701	697.5
	1.484	706.5	700.5	697.5
	1.485	706	699.5	699
	1.486	708.5	697.5	698
	1.487	709.5	701	697
	1.488	710	697	699
	1.489	707	697.5	697
	1.49	706.5	699.5	698
	1.491	709.5	697	694.5
	1.492	707.5	698.5	695.5
	1.493	705.5	695.5	696
	1.494	709	698	693.5
	1.495	707.5	693.5	696
	1.496	706.5	697.5	693
	1.497	710	697	694.5
	1.498	709.5	694.5	694
	1.499	703.5	695	699.5
	1.5	706	697.5	698.5
	1.501	707	697.5	695.5
	1.502	706.5	698.5	695
	1.503	706	695.5	695.5
	1.504	707.5	693.5	694.5
	1.505	707.5	693.5	697
	1.506	706.5	694	695
	1.507	708.5	694.5	699.5
	1.508	709	695.5	701
	1.509	704.5	694	696.5
	1.51	707	693.5	696
	1.511	708	698	697
	1.512	711	691	695
	1.513	707	696	697.5
	1.514	705	696.5	697
	1.515	707.5	693	696.5
	1.516	706	693.5	697.5
	1.517	706.5	696	698.5
	1.518	704.5	695.5	696.5
	1.519	706	695.5	694.5
	1.52	708	698.5	698
	1.521	708.5	697	695.5
	1.522	703	695.5	696
	1.523	705.5	696	697.5
	1.524	705.5	699.5	697.5
	1.525	710	697.5	699.5
	1.526	705	698	696.5
	1.527	705.5	697	699.5
	1.528	704.5	698.5	700
	1.529	705.5	698	697.5
	1.53	704.5	698.5	697
	1.531	701	700	698.5
	1.532	706.5	697.5	697.5
	1.533	703	699.5	697.5
	1.534	706.5	698	696.5
	1.535	703	698.5	697
	1.536	702.5	698	692.5
	1.537	704	701	701
	1.538	701	699	695.5
	1.539	705.5	701	695.5
	1.54	703	700	697.5
	1.541	706.5	701	696.5
	1.542	700	703	697.5
	1.543	702.5	698.5	700.5
	1.544	700.5	700	693.5
	1.545	700.5	703	696
	1.546	704	699.5	695
	1.547	703.5	705.5	696.5
	1.548	702.5	704	696.5
	1.549	704.5	701	697.5
	1.55	699	703.5	698.5
	1.551	703.5	705.5	699
	1.552	700.5	705	697.5
	1.553	703	704.5	697.5
	1.554	700.5	706.5	697.5
	1.555	701	705.5	698.5
	1.556	700.5	702.5	698
	1.557	701	704.5	698.5
	1.558	701	708	694.5
	1.559	701	704.5	696
	1.56	699	705.5	696.5
	1.561	700.5	707	699
	1.562	705.5	705.5	698.5
	1.563	699.5	705	700
	1.564	701	705.5	699
	1.565	700.5	704.5	701
	1.566	700.5	706	696
	1.567	700	705.5	701
	1.568	701	707	699.5
	1.569	699.5	706.5	699
	1.57	703.5	706.5	694.5
	1.571	701	706.5	697.5
	1.572	703	706	699
	1.573	701	704.5	698
	1.574	700.5	707.5	696
	1.575	699	705.5	698
	1.576	700	707	698.5
	1.577	700	708	695.5
	1.578	698.5	709	696.5
	1.579	704.5	705.5	693.5
	1.58	698.5	708.5	697
	1.581	699	704.5	694
	1.582	704.5	703.5	698
	1.583	703	703.5	697.5
	1.584	700	703	697
	1.585	701	707.5	696
	1.586	703	706	691
	1.587	704	703	698
	1.588	701	708.5	697.5
	1.589	701	706.5	701
	1.59	702.5	707.5	695.5
	1.591	701	704.5	698.5
	1.592	701	706	697.5
	1.593	701	703	695
	1.594	703	704.5	694.5
	1.595	703.5	703	700
	1.596	703	704.5	692.5
	1.597	701	705.5	694.5
	1.598	704	705.5	694.5
	1.599	703	706.5	697.5
	1.6	703	706	698
	1.601	700	706.5	697.5
	1.602	701	706	698.5
	1.603	702	705.5	696
	1.604	704.5	707.5	695
	1.605	705	706.5	694.5
	1.606	707.5	706	693.5
	1.607	703	708	697.5
	1.608	700.5	704.5	694.5
	1.609	701	707	692.5
	1.61	701	708	697.5
	1.611	704	710	693.5
	1.612	703	706.5	696.5
	1.613	703	705.5	697
	1.614	704	710.5	693.5
	1.615	703.5	709	694
	1.616	705	709.5	693.5
	1.617	705.5	710.5	696.5
	1.618	704.5	707.5	695
	1.619	702.5	708.5	697.5
	1.62	704	706	693.5
	1.621	706.5	706.5	697
	1.622	707	708.5	698
	1.623	704.5	706	694
	1.624	705	709	694.5
	1.625	703.5	707	691
	1.626	704.5	704.5	693.5
	1.627	701	707.5	697.5
	1.628	705.5	710.5	696.5
	1.629	704.5	711.5	698.5
	1.63	704.5	709	700
	1.631	705.5	705	695
	1.632	704.5	709.5	693.5
	1.633	704	707	691.5
	1.634	705.5	706.5	695.5
	1.635	703	709.5	695.5
	1.636	705.5	708	695.5
	1.637	706.5	707	696
	1.638	704.5	710.5	693
	1.639	706.5	710.5	695.5
	1.64	706	708	697
	1.641	704.5	710.5	697.5
	1.642	705.5	708	694.5
	1.643	703.5	704.5	696
	1.644	703	708.5	696
	1.645	703.5	707	694
	1.646	705	705.5	697
	1.647	704.5	703	698.5
	1.648	703	705	694.5
	1.649	709.5	703.5	698
	1.65	705.5	704.5	697.5
	1.651	704.5	708	697.5
	1.652	705	704	693.5
	1.653	703	704.5	697.5
	1.654	701	701	697.5
	1.655	705	703.5	697
	1.656	704.5	703	695.5
	1.657	706	700	698.5
	1.658	706.5	702.5	698
	1.659	703.5	704.5	697.5
	1.66	707.5	700.5	697.5
	1.661	704.5	701	695.5
	1.662	708	700	695.5
	1.663	709.5	701	697.5
	1.664	703.5	699.5	697
	1.665	704	701	697
	1.666	707	698	696.5
	1.667	706.5	704	697
	1.668	702.5	699	695.5
	1.669	704	701	697.5
	1.67	706	698	700.5
	1.671	704.5	694.5	694
	1.672	704	701	697
	1.673	706	694.5	699.5
	1.674	707.5	697	695.5
	1.675	706	694	698.5
	1.676	707	695.5	697.5
	1.677	705.5	698.5	695
	1.678	707.5	694	699.5
	1.679	705.5	698	697
	1.68	706	697	698
	1.681	706.5	699.5	699
	1.682	709	698.5	696.5
	1.683	707	698.5	699
	1.684	706.5	697.5	699.5
	1.685	703.5	696	694
	1.686	707	697.5	695
	1.687	708	696.5	696.5
	1.688	709.5	695.5	697.5
	1.689	705.5	692.5	697.5
	1.69	709.5	695.5	695.5
	1.691	705.5	695.5	696.5
	1.692	707.5	697.5	699
	1.693	705.5	700.5	696.5
	1.694	702.5	698	698
	1.695	704.5	697.5	692.5
	1.696	706	699.5	696.5
	1.697	707.5	695	698
	1.698	706	698.5	697.5
	1.699	708.5	696	697
	1.7	708.5	699.5	696
	1.701	706.5	697.5	695
	1.702	707.5	697.5	694.5
	1.703	704.5	700	693
	1.704	703	697	697
	1.705	705.5	697.5	696.5
	1.706	707	699.5	697.5
	1.707	706.5	699	693.5
	1.708	708.5	701	697.5
	1.709	706.5	699	700.5
	1.71	705	700.5	696
	1.711	706.5	697.5	696
	1.712	708.5	701	696.5
	1.713	705	701	695.5
	1.714	705	705	698.5
	1.715	705.5	704	698
	1.716	703.5	703	697.5
	1.717	707	700	697.5
	1.718	704.5	703.5	697.5
	1.719	704	701	697.5
	1.72	706	699	696.5
	1.721	704	703.5	694.5
	1.722	703.5	703	698
	1.723	706	701	696
	1.724	703.5	702.5	697.5
	1.725	704.5	704.5	694.5
	1.726	705	701	696.5
	1.727	703.5	709.5	697.5
	1.728	703.5	704	698
	1.729	705.5	705.5	701
	1.73	704	703	697.5
	1.731	702.5	706	694
	1.732	705.5	701	698
	1.733	704.5	703	699
	1.734	704.5	700	698
	1.735	702	704	697
	1.736	706.5	707.5	697.5
	1.737	705.5	705.5	697.5
	1.738	704.5	704	700
	1.739	703.5	704.5	699.5
	1.74	706	701	695.5
	1.741	703.5	705	700
	1.742	704.5	704.5	694.5
	1.743	704	704.5	696.5
	1.744	704	706	698
	1.745	706.5	704	700
	1.746	705.5	707	699.5
	1.747	705	704	699
	1.748	706.5	703.5	697.5
	1.749	705.5	703	699
	1.75	704.5	703.5	697.5
	1.751	706	706.5	698
	1.752	704.5	705.5	697.5
	1.753	707	709	700
	1.754	704.5	704	698.5
	1.755	704.5	706	698
	1.756	703.5	706.5	696.5
	1.757	707	704.5	699
	1.758	704.5	701	697.5
	1.759	705.5	705	700
	1.76	705.5	704.5	698
	1.761	706.5	704.5	693.5
	1.762	703.5	704.5	696.5
	1.763	704.5	705	696.5
	1.764	707	704.5	698.5
	1.765	703.5	701	695.5
	1.766	706	704	695.5
	1.767	699.5	705.5	695
	1.768	704.5	706	698
	1.769	703.5	702	697.5
	1.77	704	703	700.5
	1.771	704.5	704	693.5
	1.772	704.5	702.5	698
	1.773	703	703	700
	1.774	703.5	705	698
	1.775	706	704	697
	1.776	707	703.5	696.5
	1.777	704	704.5	695.5
	1.778	704	706	695
	1.779	706	704.5	693.5
	1.78	703	703.5	696.5
	1.781	703.5	704.5	697.5
	1.782	703	700	697.5
	1.783	705.5	704.5	697.5
	1.784	701	700.5	698.5
	1.785	703	704.5	697.5
	1.786	705	701	696.5
	1.787	701	705	698
	1.788	701	701	697
	1.789	704	701	696.5
	1.79	705.5	704.5	698
	1.791	704	706	696.5
	1.792	701	701	696.5
	1.793	704	703	695
	1.794	702.5	704	696.5
	1.795	703.5	701	695
	1.796	701	700	697.5
	1.797	701	704	698
	1.798	701	704.5	698
	1.799	704.5	703.5	698
	1.8	700	705	696
	1.801	703.5	705	697
	1.802	701	701	700
	1.803	703	704.5	698.5
	1.804	699	704	698.5
	1.805	701	706.5	697.5
	1.806	698.5	704.5	697.5
	1.807	701	706	697.5
	1.808	699.5	704.5	698.5
	1.809	704.5	703.5	698
	1.81	699	701	696.5
	1.811	705.5	703.5	698.5
	1.812	703	706	696.5
	1.813	704	705	700
	1.814	700.5	703	697
	1.815	699.5	706.5	697.5
	1.816	704.5	703	698.5
	1.817	705.5	699.5	700
	1.818	700.5	706	697.5
	1.819	702	703	700
	1.82	701	704.5	697.5
	1.821	703	701	698
	1.822	700.5	700.5	699.5
	1.823	705	700	700
	1.824	703	700	697.5
	1.825	701	701	698.5
	1.826	703.5	701	697.5
	1.827	700	703.5	698.5
	1.828	704.5	703.5	701
	1.829	704	703	697.5
	1.83	704.5	706.5	698.5
	1.831	701	701	699
	1.832	701	702.5	700
	1.833	704	703.5	699
	1.834	704.5	704	699.5
	1.835	704	704	696.5
	1.836	699.5	703	697.5
	1.837	701	703	699.5
	1.838	706	705.5	699.5
	1.839	703	701	697.5
	1.84	704.5	704.5	697.5
	1.841	708.5	700	697.5
	1.842	703.5	703	703
	1.843	706.5	700	698.5
	1.844	705.5	703	700
	1.845	704	702	701
	1.846	701	701	698.5
	1.847	704	699.5	698
	1.848	706.5	703.5	699.5
	1.849	706.5	703.5	695.5
	1.85	704.5	704	696
	1.851	706	704.5	698
	1.852	704	699	696.5
	1.853	701	704.5	699
	1.854	705	701	699.5
	1.855	704.5	701	697.5
	1.856	704.5	701	702
	1.857	705	705	700
	1.858	703.5	704	700.5
	1.859	704.5	704	697
	1.86	704	705	699
	1.861	706	703	701
	1.862	706	699.5	700
	1.863	703.5	700.5	700.5
	1.864	708	701	700
	1.865	704.5	700.5	701
	1.866	704.5	697.5	701
	1.867	707	697	704
	1.868	709	702.5	701
	1.869	706	700	699
	1.87	703.5	698.5	701
	1.871	710	701	700.5
	1.872	704.5	701	700
	1.873	705	699	698.5
	1.874	708.5	701	699
	1.875	710	701	700.5
	1.876	709.5	702.5	697
	1.877	706	700	700
	1.878	707.5	698	700.5
	1.879	706	699	701
	1.88	704	701	700
	1.881	704.5	702.5	704.5
	1.882	707.5	698.5	702.5
	1.883	705	700	704.5
	1.884	708	699.5	703.5
	1.885	705	699.5	701
	1.886	706.5	701	704
	1.887	705.5	697.5	701
	1.888	705.5	697	704.5
	1.889	706	697	703.5
	1.89	705.5	702	701
	1.891	706.5	694	702
	1.892	706.5	698	703.5
	1.893	707	700.5	702.5
	1.894	707	697	700
	1.895	708	696.5	701
	1.896	705	695.5	704.5
	1.897	709	695	700.5
	1.898	707	697.5	703.5
	1.899	704.5	696	703
	1.9	708	696.5	704.5
	1.901	707.5	698	703
	1.902	707	694	702
	1.903	709.5	699.5	698.5
	1.904	701	695.5	699.5
	1.905	704.5	691	700.5
	1.906	706	693	701
	1.907	705.5	695	702.5
	1.908	706.5	694.5	701
	1.909	705.5	698	701
	1.91	707	696	701
	1.911	708	696.5	702.5
	1.912	705.5	692	704.5
	1.913	704.5	697.5	700.5
	1.914	704	696	700
	1.915	706	694	700
	1.916	707.5	695.5	699
	1.917	704	695.5	701
	1.918	707.5	697	697.5
	1.919	705.5	695.5	698.5
	1.92	704.5	697.5	701
	1.921	708	697	701
	1.922	704.5	697	702
	1.923	707	697.5	698
	1.924	705	697.5	701
	1.925	704.5	697.5	700.5
	1.926	704	697.5	699
	1.927	706.5	699.5	699.5
	1.928	706.5	697	698.5
	1.929	704.5	699	700.5
	1.93	705	698.5	696
	1.931	705.5	697.5	698.5
	1.932	706.5	698.5	697.5
	1.933	705.5	699.5	699
	1.934	706	700.5	702.5
	1.935	707	701	698.5
	1.936	707.5	699	695.5
	1.937	708.5	702	700.5
	1.938	707	700.5	696
	1.939	704.5	698	698
	1.94	709	701	699.5
	1.941	702.5	698.5	696.5
	1.942	704.5	697.5	698
	1.943	703	700	701
	1.944	704.5	702	698
	1.945	707	701	696.5
	1.946	707	703.5	696.5
	1.947	710.5	703.5	697
	1.948	704.5	702.5	696.5
	1.949	706	706	699.5
	1.95	705	703	700.5
	1.951	708.5	703	695.5
	1.952	705.5	703.5	696.5
	1.953	704	704	699.5
	1.954	704	703	699.5
	1.955	705	704.5	699.5
	1.956	705	703	699
	1.957	705	704.5	700
	1.958	704.5	704.5	701
	1.959	704	704	699
	1.96	704	706	699
	1.961	704.5	705.5	699
	1.962	705.5	705.5	699.5
	1.963	701	701	703
	1.964	706	701	701
	1.965	704.5	708	697.5
	1.966	705.5	703	700
	1.967	706.5	706	701
	1.968	700	700	701
	1.969	700.5	701	700.5
	1.97	704	702.5	704
	1.971	704	707.5	701
	1.972	704.5	705.5	704
	1.973	707	702.5	704.5
	1.974	709	703.5	703
	1.975	702.5	703	701
	1.976	704.5	706.5	704
	1.977	703	703	703.5
	1.978	705.5	702.5	701
	1.979	706.5	704.5	701
	1.98	704.5	705	704.5
	1.981	702.5	706	703
	1.982	705.5	701	703
	1.983	704	704.5	704
	1.984	704	702.5	700.5
	1.985	703.5	707	704
	1.986	704.5	703	700.5
	1.987	705.5	706	702.5
	1.988	707.5	704.5	701
	1.989	706.5	704.5	703.5
	1.99	704.5	703	699
	1.991	706	704.5	700
	1.992	707.5	706.5	704.5
	1.993	703.5	705	697.5
[truncated: 6,006 more rows]

## Sheet: C
DataTypeVer2.0	Time	Fz	Fz	Fz
NumberOfData		15000	15000	15000
PreTriggerData		0	0	0
SamplingTime[ms]		1	1	1
DataLabel		AE1:CMJ	AE2:CMJ	AE3:CMJ
DataUnit	sec	N	N	N
	0	696	689.5	700.5
	0.001	696.5	687.5	698
	0.002	696	684.5	699
	0.003	696	687.5	697.5
	0.004	694.5	690	699
	0.005	695	687.5	699
	0.006	695	687.5	698
	0.007	696	690.5	697
	0.008	693	688	696.5
	0.009	695	691	699
	0.01	693	688	698.5
	0.011	695	687.5	698.5
	0.012	694	688.5	697
	0.013	695	688.5	700.5
	0.014	695.5	690	698
	0.015	693	684	703.5
	0.016	699.5	688	698.5
	0.017	693	689	697
	0.018	697	688	696
	0.019	695	691	698.5
	0.02	695.5	687.5	700
	0.021	691	690	698.5
	0.022	691.5	688.5	698.5
	0.023	697	690.5	699.5
	0.024	693	688	699
	0.025	697	690.5	697.5
	0.026	695	690	699
	0.027	695	690	698.5
	0.028	697.5	692.5	698.5
	0.029	696	691	697
	0.03	698	691	699.5
	0.031	695	689	698.5
	0.032	695	690.5	698.5
	0.033	698	689.5	697.5
	0.034	696	690.5	697
	0.035	695	693	700.5
	0.036	697.5	693	697
	0.037	695.5	690.5	698
	0.038	694.5	691	695
	0.039	691.5	692	697.5
	0.04	696.5	691	697.5
	0.041	696	693	697.5
	0.042	699.5	695.5	699
	0.043	696	691	698
	0.044	693	693	696
	0.045	699	695.5	697.5
	0.046	697.5	695	697.5
	0.047	696.5	690.5	696
	0.048	693	693	697.5
	0.049	696	689.5	698.5
	0.05	696.5	690.5	693.5
	0.051	699	691.5	697.5
	0.052	696.5	692	697.5
	0.053	697	698.5	694.5
	0.054	697	695	696.5
	0.055	694.5	691	698
	0.056	693	693	702
	0.057	695	694	698
	0.058	695	692.5	694.5
	0.059	692.5	696	697
	0.06	696	700	699
	0.061	694.5	697	700
	0.062	695	696.5	700
	0.063	695	697.5	698
	0.064	696	696.5	695.5
	0.065	697	693	702.5
	0.066	693	696.5	700.5
	0.067	693	698	698.5
	0.068	697	702.5	701
	0.069	697.5	698.5	696.5
	0.07	695.5	696	697
	0.071	695	696.5	698.5
	0.072	697	697	698.5
	0.073	693	697.5	698
	0.074	697.5	694.5	696.5
	0.075	697.5	697	700.5
	0.076	693.5	698	698
	0.077	693	694.5	698
	0.078	693	698	699.5
	0.079	694.5	699.5	698
	0.08	697	700	697
	0.081	695.5	697.5	698.5
	0.082	696	697.5	696
	0.083	693	697.5	695.5
	0.084	693	700.5	696.5
	0.085	695	697	697
	0.086	695.5	697.5	698
	0.087	696.5	698.5	696.5
	0.088	693	701.5	699
	0.089	694	700	697.5
	0.09	692	700.5	700.5
	0.091	695	698.5	699
	0.092	691.5	701.5	698.5
	0.093	694.5	700.5	697.5
	0.094	692	698	703
	0.095	694.5	696.5	699.5
	0.096	695.5	700.5	700
	0.097	694.5	699	702
	0.098	692.5	698.5	702
	0.099	695.5	702	699.5
	0.1	692.5	699	699.5
	0.101	697	700.5	702
	0.102	692.5	699.5	702
	0.103	694	700	703
	0.104	695	700.5	700
	0.105	691.5	702	699.5
	0.106	693	700.5	701.5
	0.107	691.5	703	700
	0.108	693	703	702
	0.109	695.5	699	697.5
	0.11	690	701.5	696
	0.111	692.5	699	701.5
	0.112	697.5	700	703
	0.113	696	702.5	701
	0.114	694.5	703	700.5
	0.115	691	700.5	700
	0.116	696.5	701	700.5
	0.117	695	702.5	700.5
	0.118	695	699	698
	0.119	694.5	699.5	701
	0.12	694	698.5	700.5
	0.121	696.5	700.5	703.5
	0.122	695.5	700.5	701
	0.123	696	700.5	701.5
	0.124	696	702	700.5
	0.125	694.5	699	702.5
	0.126	694	699.5	704
	0.127	697	701	700.5
	0.128	697.5	701.5	702
	0.129	694.5	698	704
	0.13	697.5	700.5	698.5
	0.131	697.5	698	700
	0.132	696.5	702.5	702.5
	0.133	697.5	699	701.5
	0.134	699	697.5	701
	0.135	695.5	701	698
	0.136	696.5	701.5	701
	0.137	697.5	697.5	702
	0.138	697.5	697.5	697
	0.139	698	697	702
	0.14	700	698.5	700
	0.141	697.5	700	700.5
	0.142	696	694.5	700
	0.143	697	698	697.5
	0.144	695.5	694.5	698.5
	0.145	698	702	697.5
	0.146	696	698.5	700
	0.147	697	696.5	698.5
	0.148	699	697.5	699
	0.149	697.5	700.5	699.5
	0.15	698	693	698
	0.151	697.5	696	701.5
	0.152	696.5	697	697.5
	0.153	699	697	703
	0.154	701	699	698.5
	0.155	700.5	697.5	699
	0.156	697.5	696.5	700
	0.157	698.5	698.5	699.5
	0.158	699	697	699
	0.159	699	698.5	703.5
	0.16	699	697.5	698
	0.161	701.5	697.5	699
	0.162	702	697.5	700.5
	0.163	695.5	694.5	701
	0.164	696.5	697.5	700
	0.165	697.5	695	700
	0.166	700.5	700.5	699.5
	0.167	699.5	696.5	699
	0.168	701.5	697.5	699
	0.169	698.5	697	702
	0.17	700.5	697.5	699
	0.171	702.5	699.5	700.5
	0.172	701.5	699.5	701.5
	0.173	700.5	695.5	701
	0.174	699	697.5	699.5
	0.175	702.5	697.5	699.5
	0.176	701.5	696.5	701.5
	0.177	698.5	700	698.5
	0.178	698.5	697.5	701
	0.179	703	696	697
	0.18	699.5	697.5	698.5
	0.181	703	696.5	697.5
	0.182	698.5	693	700.5
	0.183	703.5	697.5	698
	0.184	702	696.5	696.5
	0.185	703.5	693	697.5
	0.186	700.5	697.5	697
	0.187	704.5	695.5	697.5
	0.188	703	698	696.5
	0.189	704	692.5	698.5
	0.19	703.5	699.5	695.5
	0.191	702.5	695.5	698
	0.192	701.5	699.5	697.5
	0.193	704.5	695.5	700.5
	0.194	697	697.5	700.5
	0.195	701	694	699.5
	0.196	704.5	700.5	700
	0.197	704.5	698.5	698
	0.198	701	697	697.5
	0.199	700.5	698	698.5
	0.2	700	697	698.5
	0.201	702	702.5	695
	0.202	704.5	696.5	697.5
	0.203	700.5	697	696
	0.204	702	695.5	696
	0.205	702	702	701.5
	0.206	702.5	696	697.5
	0.207	703	693	697.5
	0.208	702	698	697.5
	0.209	701.5	697	696.5
	0.21	702.5	697	697.5
	0.211	701.5	701.5	699.5
	0.212	702.5	698.5	699
	0.213	698	696	698
	0.214	701.5	694.5	697
	0.215	700.5	696	697.5
	0.216	700	698	697
	0.217	697.5	694.5	697.5
	0.218	699	696.5	700
	0.219	700.5	694.5	698.5
	0.22	701	697.5	698
	0.221	701	698	695
	0.222	697.5	694	696.5
	0.223	699.5	696.5	697.5
	0.224	699.5	696.5	693
	0.225	700	699.5	696.5
	0.226	700.5	698.5	697
	0.227	698.5	696	698
	0.228	698	697.5	694.5
	0.229	701	691.5	697
	0.23	694.5	698	695
	0.231	700	697	693
	0.232	693	699	695.5
	0.233	698	696	695
	0.234	697	695	695
	0.235	692.5	696	694.5
	0.236	697	696.5	693
	0.237	694.5	696.5	697.5
	0.238	694.5	697	696.5
	0.239	697.5	695.5	694.5
	0.24	696.5	696.5	693
	0.241	696	694.5	696.5
	0.242	695	697.5	694
	0.243	695	696	696
	0.244	696	692.5	695
	0.245	694	696.5	693
	0.246	696.5	693	693
	0.247	692.5	697.5	696.5
	0.248	692	695	693
	0.249	691.5	696	695
	0.25	693	695	692
	0.251	693	697.5	694.5
	0.252	690.5	696	693
	0.253	692	697	694.5
	0.254	691	693	691.5
	0.255	695	695	694
	0.256	692.5	695	691.5
	0.257	694	696.5	691.5
	0.258	691	697	697.5
	0.259	690.5	695	695
	0.26	693	695	694.5
	0.261	689.5	695	693
	0.262	689.5	694	693
	0.263	690	697.5	692.5
	0.264	691	692	693
	0.265	691.5	695	690.5
	0.266	691	691.5	692
	0.267	691.5	692.5	691
	0.268	687.5	693	692.5
	0.269	690.5	696	693.5
	0.27	690.5	695	694
	0.271	689.5	693	693
	0.272	690.5	697.5	695
	0.273	689.5	696	693
	0.274	689.5	691	694.5
	0.275	694	696	696
	0.276	691	693	695
	0.277	693	698.5	693
	0.278	693	696.5	691
	0.279	687.5	697.5	691.5
	0.28	685.5	696.5	689.5
	0.281	690	697.5	690
	0.282	689.5	698	695
	0.283	689.5	696	693
	0.284	690.5	695.5	693
	0.285	689	694.5	696
	0.286	692.5	696.5	693
	0.287	690.5	698	696
	0.288	690.5	696.5	698
	0.289	690.5	696.5	696
	0.29	689	699	691
	0.291	691	697.5	692
	0.292	693	697.5	697.5
	0.293	690.5	697	693
	0.294	692	694.5	695
	0.295	691	697	695.5
	0.296	692	697.5	695
	0.297	692.5	697.5	697
	0.298	688.5	694.5	695
	0.299	694.5	698.5	694
	0.3	693	697.5	692.5
	0.301	692	697.5	693
	0.302	690.5	696.5	694.5
	0.303	689.5	696.5	695
	0.304	692	697.5	694.5
	0.305	691	698	697.5
	0.306	692	694	696.5
	0.307	691.5	696	693
	0.308	692.5	698.5	695.5
	0.309	692	695.5	694.5
	0.31	692.5	699	694
	0.311	692.5	696.5	693
	0.312	697	697	696
	0.313	694	695	695.5
	0.314	695.5	694.5	698.5
	0.315	690.5	696	697.5
	0.316	691.5	697.5	696
	0.317	694.5	697.5	695.5
	0.318	692	695.5	694.5
	0.319	692.5	697	693
	0.32	696	697	696.5
	0.321	690	696.5	694.5
	0.322	692.5	695.5	699
	0.323	693	696.5	695
	0.324	691.5	693	694.5
	0.325	695	697.5	693
	0.326	695	696	692.5
	0.327	692	698.5	698.5
	0.328	693	695.5	695
	0.329	695	694	698.5
	0.33	697	696	695.5
	0.331	696	697.5	695.5
	0.332	698	692.5	697
	0.333	693	697.5	693
	0.334	695.5	698	696.5
	0.335	695.5	698	697
	0.336	698.5	695.5	694.5
	0.337	697	695.5	696
	0.338	697.5	697.5	697.5
	0.339	691.5	697.5	693
	0.34	695	695	698
	0.341	695.5	693	695.5
	0.342	699	697.5	691
	0.343	693	697	698.5
	0.344	695.5	694.5	698.5
	0.345	696.5	697.5	693
	0.346	697.5	697	693
	0.347	695.5	696.5	697
	0.348	696.5	696.5	696.5
	0.349	695	697	694.5
	0.35	697	696.5	697.5
	0.351	701.5	694.5	696.5
	0.352	697.5	694.5	693
	0.353	698.5	697.5	696
	0.354	695	698	699
	0.355	693.5	697.5	697.5
	0.356	698.5	696	696
	0.357	700	697.5	699
	0.358	700	699.5	696
	0.359	698.5	696	696
	0.36	698	695.5	696
	0.361	698	698	698.5
	0.362	700	697	697
	0.363	699.5	697	700.5
	0.364	700	695.5	698
	0.365	698.5	691.5	696
	0.366	697.5	698	697
	0.367	698	697.5	697
	0.368	699.5	695	693
	0.369	697	697.5	694.5
	0.37	697.5	695.5	697.5
	0.371	701	696.5	696
	0.372	698.5	695.5	692
	0.373	699.5	696.5	693
	0.374	699.5	696.5	695
	0.375	697.5	694.5	697
	0.376	699	696.5	698
	0.377	699.5	694	692
	0.378	700	695	696
	0.379	697.5	701.5	698
	0.38	699.5	694.5	694
	0.381	698	697.5	697
	0.382	698.5	698	696.5
	0.383	699	694	693
	0.384	699.5	696.5	696
	0.385	700.5	697.5	693
	0.386	699	697.5	695
	0.387	698	699	695
	0.388	698	699	698
	0.389	702	696.5	693
	0.39	706	697	694.5
	0.391	697	695.5	693
	0.392	696.5	694.5	690
	0.393	701	696.5	698
	0.394	699	698.5	694
	0.395	698	696.5	691.5
	0.396	697.5	695.5	693
	0.397	697	696	693
	0.398	698	697	693
	0.399	697.5	697.5	691.5
	0.4	697.5	695	693
	0.401	698.5	695	693
	0.402	697.5	696	692
	0.403	695	699.5	690
	0.404	695	696	692.5
	0.405	697.5	696.5	693
	0.406	694.5	698.5	692.5
	0.407	697	694.5	691.5
	0.408	696.5	698	690.5
	0.409	697.5	697	691.5
	0.41	696.5	695.5	690
	0.411	698	698	689.5
	0.412	694.5	695.5	693
	0.413	700	697	692
	0.414	694.5	694	692
	0.415	696.5	695	693
	0.416	698.5	697	687
	0.417	697.5	697.5	686.5
	0.418	697	699.5	690
	0.419	697.5	697.5	690.5
	0.42	697	697.5	688.5
	0.421	696	694.5	690
	0.422	694	693	691
	0.423	697	694	687
	0.424	695	699.5	689.5
	0.425	697	696	691
	0.426	694.5	698	692
	0.427	697.5	699.5	693
	0.428	696	696.5	693
	0.429	698.5	696.5	689.5
	0.43	694.5	696.5	690
	0.431	696.5	697.5	691.5
	0.432	693	701	689.5
	0.433	694	695.5	690
	0.434	695	697.5	691
	0.435	692	699	693
	0.436	693	698.5	692.5
	0.437	694.5	697.5	694
	0.438	695.5	696	688.5
	0.439	694	699	691
	0.44	694.5	700.5	691.5
	0.441	696	699.5	695
	0.442	696.5	698.5	693
	0.443	691	694.5	691.5
	0.444	696.5	701	690
	0.445	693	698	691.5
	0.446	695	697.5	692
	0.447	694.5	699.5	693
	0.448	697	697.5	692
	0.449	694	698.5	689
	0.45	693	696	693.5
	0.451	695.5	702	693
	0.452	694	698	694.5
	0.453	694.5	701.5	693
	0.454	692	700	696
	0.455	697.5	699	693
	0.456	697	697.5	695
	0.457	697.5	700.5	694.5
	0.458	693.5	701	695.5
	0.459	695	698.5	691
	0.46	695.5	698	694
	0.461	696.5	700.5	697
	0.462	696.5	700	691.5
	0.463	697.5	698.5	695
	0.464	696.5	700.5	694.5
	0.465	699.5	699.5	693
	0.466	702	699.5	693
	0.467	694	699	695
	0.468	698	702.5	691.5
	0.469	698	701.5	695.5
	0.47	698.5	697.5	692.5
	0.471	696	698.5	692
	0.472	698	702	695.5
	0.473	697.5	697.5	695
	0.474	697.5	695	696.5
	0.475	697.5	696	692
	0.476	699.5	698	691.5
	0.477	697	699	693
	0.478	697.5	697.5	694.5
	0.479	695.5	697	693
	0.48	695.5	694	697
	0.481	695	697	690.5
	0.482	695.5	698	691.5
	0.483	700.5	698.5	693.5
	0.484	696.5	695.5	692.5
	0.485	695.5	696.5	695.5
	0.486	700.5	693	691
	0.487	696.5	696	692.5
	0.488	697	693	692
	0.489	700	694	692.5
	0.49	700.5	694.5	693
	0.491	696.5	693	692.5
	0.492	697.5	696.5	696
	0.493	698.5	693	694
	0.494	699	696	696
	0.495	700	695	692.5
	0.496	697	698	697
	0.497	698.5	695	693
	0.498	696.5	696	693
	0.499	697.5	693	695.5
	0.5	699.5	695	696
	0.501	696.5	693	693
	0.502	698	690.5	694.5
	0.503	699	690.5	690.5
	0.504	700.5	693	691.5
	0.505	696	691	693
	0.506	697.5	692	692
	0.507	698	693	696
	0.508	697.5	693	692.5
	0.509	696	692	691.5
	0.51	698.5	693	692
	0.511	699.5	690	692
	0.512	699.5	693	694.5
	0.513	697.5	694	693
	0.514	697.5	692	694
	0.515	696	695.5	692.5
	0.516	700.5	695	695.5
	0.517	698.5	690.5	694.5
	0.518	700.5	693	694.5
	0.519	698	692	693
	0.52	698.5	690.5	695.5
	0.521	698.5	695	692.5
	0.522	699	691.5	693
	0.523	695.5	689	695.5
	0.524	700	690	690.5
	0.525	698	690.5	694
	0.526	698	690.5	698
	0.527	702	692	697
	0.528	698	689.5	695.5
	0.529	698	693	697
	0.53	695.5	689	696
	0.531	697.5	692	693
	0.532	697	691	694
	0.533	698.5	693	694.5
	0.534	698.5	691.5	699.5
	0.535	697.5	693	699
	0.536	699	692	697.5
	0.537	697.5	692.5	696
	0.538	697	690	694.5
	0.539	696.5	692	695
	0.54	697	691.5	694
	0.541	699	691.5	695
	0.542	696	690.5	695
	0.543	697.5	693	696.5
	0.544	698	693	697
	0.545	697.5	695	697.5
	0.546	697.5	693	694.5
	0.547	696.5	692.5	698
	0.548	697.5	690	697
	0.549	695.5	695	695.5
	0.55	697	693	699.5
	0.551	696.5	690.5	699
	0.552	701	693	696.5
	0.553	695.5	694.5	695.5
	0.554	697	695	697.5
	0.555	699	690.5	697.5
	0.556	692	693	697.5
	0.557	697	693	695.5
	0.558	701	693	697
	0.559	698	695	697.5
	0.56	699	690.5	697.5
	0.561	697.5	696.5	698
	0.562	699	693	697.5
	0.563	700.5	694.5	696.5
	0.564	698	696	695
	0.565	698	696	698
	0.566	701.5	692	699
	0.567	699	697	701.5
	0.568	700.5	693	696.5
	0.569	698.5	695	698.5
	0.57	702	697.5	698
	0.571	698	694.5	699.5
	0.572	699	697	700
	0.573	700.5	695.5	701
	0.574	700.5	695	699.5
	0.575	697	699	696
	0.576	698.5	697	695.5
	0.577	699.5	695	698.5
	0.578	696.5	697.5	697.5
	0.579	697	697	703.5
	0.58	697	699	697
	0.581	699.5	699.5	697.5
	0.582	696.5	697.5	697.5
	0.583	699	698	696.5
	0.584	701.5	700	704
	0.585	697.5	703.5	700
	0.586	698.5	699.5	698.5
	0.587	699	696.5	703.5
	0.588	698.5	696.5	701.5
	0.589	697	698.5	700
	0.59	697	696	703.5
	0.591	697.5	700	699.5
	0.592	698	702.5	700.5
	0.593	699	701.5	702.5
	0.594	698.5	703	699
	0.595	702.5	701.5	701.5
	0.596	700	698	699.5
	0.597	697.5	700.5	695.5
	0.598	698	700.5	701
	0.599	696.5	697.5	701.5
	0.6	698.5	701	698.5
	0.601	697	699.5	699
	0.602	698	700	698.5
	0.603	696.5	699	700
	0.604	697.5	701	698
	0.605	700	698.5	699
	0.606	697.5	699	697.5
	0.607	698.5	699.5	697.5
	0.608	701.5	699.5	696
	0.609	697.5	698.5	697
	0.61	697.5	697.5	699.5
	0.611	701	699.5	700
	0.612	704.5	699.5	698
	0.613	698	699	700.5
	0.614	697.5	698.5	699.5
	0.615	699	700	698
	0.616	697.5	698.5	698
	0.617	698	701.5	699
	0.618	701.5	701	697.5
	0.619	700	698	700
	0.62	699.5	699	697.5
	0.621	697	697.5	697
	0.622	697.5	702.5	697
	0.623	699.5	698	697
	0.624	697.5	699	699
	0.625	700	698	700.5
	0.626	701	697.5	698.5
	0.627	697.5	697.5	696.5
	0.628	696.5	700.5	697.5
	0.629	697.5	697.5	693
	0.63	697.5	702	697
	0.631	697	700.5	697.5
	0.632	697.5	700	697.5
	0.633	699.5	698	695
	0.634	699	696	693
	0.635	700	696	692.5
	0.636	695	698	697.5
	0.637	696	695	695
	0.638	699	697	699
	0.639	697	700.5	693
	0.64	697.5	697	696
	0.641	699	696.5	697.5
	0.642	695.5	697.5	695.5
	0.643	697	701	692
	0.644	696.5	697.5	693
	0.645	697	697.5	697.5
	0.646	696	700.5	696
	0.647	697.5	700.5	696.5
	0.648	698	696.5	695.5
	0.649	696.5	696.5	698.5
	0.65	697.5	697.5	696
	0.651	694	697.5	693
	0.652	694.5	698.5	695.5
	0.653	692	698.5	695
	0.654	696.5	693	693
	0.655	692	695.5	698.5
	0.656	697.5	696.5	696
	0.657	693	694.5	694
	0.658	696	695	697
	0.659	694	698	695
	0.66	697.5	695.5	695
	0.661	692.5	698.5	697.5
	0.662	691.5	695	697
	0.663	697	697	698
	0.664	696.5	698	695.5
	0.665	696.5	693	696
	0.666	692.5	695	697.5
	0.667	695	697.5	696
	0.668	697.5	697.5	697.5
	0.669	693	698.5	698.5
	0.67	696	693	697.5
	0.671	695	696	694
	0.672	695	697	696.5
	0.673	695	696.5	696.5
	0.674	695	696	696
	0.675	696	695	697.5
	0.676	695	697.5	699.5
	0.677	694	697.5	700.5
	0.678	694	696.5	696
	0.679	695	697.5	697.5
	0.68	693	693	698.5
	0.681	693	698	695
	0.682	693	696.5	698.5
	0.683	692	694	696.5
	0.684	694	692	698.5
	0.685	692.5	694	696.5
	0.686	697.5	692.5	696.5
	0.687	695.5	696	698
	0.688	692.5	695.5	698.5
	0.689	695	693.5	695.5
	0.69	696	692.5	695
	0.691	693	694	698
	0.692	693	691	696
	0.693	691	694	698.5
	0.694	693	690	695.5
	0.695	690.5	694.5	698.5
	0.696	692	697	697.5
	0.697	694	694.5	696.5
	0.698	692	693	699.5
	0.699	698.5	693	697.5
	0.7	694.5	692.5	695.5
	0.701	694	691	698
	0.702	693	692	695.5
	0.703	696	691	696
	0.704	691.5	692.5	696.5
	0.705	693	690.5	696
	0.706	693	694.5	695
	0.707	693	687.5	695.5
	0.708	691.5	692.5	694.5
	0.709	690.5	691	699.5
	0.71	693	689	696.5
	0.711	693.5	690.5	695.5
	0.712	692.5	694.5	697
	0.713	692	692	697
	0.714	695	691.5	697.5
	0.715	695	691	697
	0.716	693	693	693
	0.717	693	693	695.5
	0.718	693	692	700.5
	0.719	693	690.5	695.5
	0.72	695	694.5	690
	0.721	693	694.5	694.5
	0.722	697.5	693	697.5
	0.723	695.5	691	697
	0.724	697.5	691.5	697
	0.725	696.5	693	697.5
	0.726	693.5	691.5	698.5
	0.727	696	693	697.5
	0.728	696	693	694.5
	0.729	698	691.5	696.5
	0.73	697	693	697.5
	0.731	692	695	696
	0.732	696	691.5	696
	0.733	696	691	697
	0.734	695	693	696.5
	0.735	694	694	695
	0.736	698.5	692	699.5
	0.737	696.5	695.5	697.5
	0.738	696.5	692.5	698
	0.739	695	692	693
	0.74	697.5	692	697
	0.741	696	692	698
	0.742	698	690.5	697
	0.743	695	692.5	697
	0.744	695	694.5	697.5
	0.745	697.5	693	697
	0.746	695.5	696	695.5
	0.747	696.5	689.5	695
	0.748	697.5	693	697.5
	0.749	693	693	695
	0.75	693	693	695
	0.751	696.5	691	696.5
	0.752	696.5	691	694.5
	0.753	694.5	693	696
	0.754	691.5	697.5	695.5
	0.755	695	691.5	696.5
	0.756	695	691	696.5
	0.757	695.5	689	696.5
	0.758	695	693	697
	0.759	697	695.5	696.5
	0.76	695.5	691	698
	0.761	696	692	699
	0.762	695.5	695	697
	0.763	693	694	695
	0.764	694.5	688	693
	0.765	694.5	690	696.5
	0.766	695	690.5	699.5
	0.767	696	688.5	695
	0.768	695	691	695
	0.769	697.5	692	695.5
	0.77	697	691.5	692.5
	0.771	696.5	689	696.5
	0.772	696	689.5	694.5
	0.773	699.5	692.5	696
	0.774	698.5	690	695.5
	0.775	697.5	695	696.5
	0.776	693	690	694.5
	0.777	698.5	694	693
	0.778	698	693	696
	0.779	698.5	690.5	692
	0.78	697.5	686	695
	0.781	697.5	689.5	694.5
	0.782	700	688.5	697.5
	0.783	696.5	690.5	695.5
	0.784	694.5	687	693
	0.785	696.5	685.5	693
	0.786	697	691	699
	0.787	697	689	695
	0.788	697	691.5	694.5
	0.789	697	690.5	694
	0.79	698	688.5	694.5
	0.791	697.5	691	693
	0.792	700.5	691	699
	0.793	697.5	691.5	693.5
	0.794	695.5	691	696.5
	0.795	696.5	687.5	695
	0.796	697	688.5	697.5
	0.797	698.5	690	698
	0.798	698.5	687	692.5
	0.799	695.5	692	697.5
	0.8	700	690.5	697.5
	0.801	700	693	693
	0.802	696	689	694.5
	0.803	697.5	688.5	697.5
	0.804	699.5	689.5	696.5
	0.805	694	690	696
	0.806	697.5	690.5	699
	0.807	698.5	689.5	695
	0.808	697	690.5	694.5
	0.809	699	689	697.5
	0.81	697	691	695
	0.811	698	692.5	697.5
	0.812	700	692	695
	0.813	697.5	689.5	695.5
	0.814	697	692.5	694.5
	0.815	702.5	693	695.5
	0.816	697.5	692.5	695.5
	0.817	701	693	699
	0.818	697.5	694	697.5
	0.819	700.5	690	697.5
	0.82	701.5	691.5	696
	0.821	699.5	696.5	697.5
	0.822	700.5	691.5	696.5
	0.823	699	692	695
	0.824	699.5	691	697
	0.825	697	696	696.5
	0.826	697.5	692	695.5
	0.827	697.5	692.5	700
	0.828	698	697	695.5
	0.829	698	691	697.5
	0.83	699	698.5	693
	0.831	700	693	702
	0.832	697	693	697
	0.833	697.5	696	693
	0.834	697.5	696	698.5
	0.835	696	696	695.5
	0.836	696.5	697	697.5
	0.837	698	697.5	696
	0.838	696	697.5	697
	0.839	695.5	700	700.5
	0.84	697.5	700	699
	0.841	697.5	699	694.5
	0.842	695	696.5	696.5
	0.843	696	697.5	695
	0.844	693	697.5	697
	0.845	696.5	697	697.5
	0.846	695.5	701.5	699
	0.847	693	702.5	697.5
	0.848	693	698.5	694.5
	0.849	695.5	697.5	697
	0.85	697.5	700.5	697.5
	0.851	695	698	697
	0.852	693	702	694
	0.853	695	697.5	695.5
	0.854	694.5	700.5	696.5
	0.855	694	701.5	699.5
	0.856	693	702	697.5
	0.857	693	701	698.5
	0.858	693	701	696.5
	0.859	693	703.5	694
	0.86	693	701.5	697
	0.861	693	701.5	696.5
	0.862	693	702	696
	0.863	691	700	697.5
	0.864	693	701	698
	0.865	689.5	704	699.5
	0.866	690.5	701.5	693
	0.867	691	703.5	696
	0.868	693	701.5	696.5
	0.869	693	700.5	696
	0.87	692.5	704.5	697
	0.871	693	703	693
	0.872	694.5	702	695
	0.873	692.5	707	695
	0.874	694.5	705	696
	0.875	695	703.5	696.5
	0.876	693	702.5	695
	0.877	693	699	695
	0.878	691	704.5	696.5
	0.879	692	699	694
	0.88	693	703.5	697.5
	0.881	691.5	702.5	695.5
	0.882	691	703.5	695
	0.883	693	704	695
	0.884	690.5	705	698.5
	0.885	692.5	701	693
	0.886	690.5	705	692.5
	0.887	691	703.5	695
	0.888	697.5	706.5	695
	0.889	692	703	695.5
	0.89	692	704	696.5
	0.891	691.5	702	692
	0.892	690.5	704	691.5
	0.893	694.5	701.5	695.5
	0.894	695.5	707	695
	0.895	694.5	701.5	693
	0.896	693	702.5	694
	0.897	696	702.5	693
	0.898	691.5	703.5	694.5
	0.899	690.5	707	692.5
	0.9	693	703.5	693
	0.901	693	702	698
	0.902	691.5	705	699
	0.903	688.5	699.5	697.5
	0.904	694.5	705	696.5
	0.905	698	706	694.5
	0.906	696	701.5	695
	0.907	696	702	690.5
	0.908	691.5	703	693
	0.909	699.5	703.5	693
	0.91	694.5	702.5	695.5
	0.911	691.5	704	696.5
	0.912	693	700	693
	0.913	695	698	698
	0.914	692.5	699	696
	0.915	697.5	698.5	697.5
	0.916	693	701.5	697.5
	0.917	697.5	698.5	698.5
	0.918	694	698	700.5
	0.919	693	699	697
	0.92	693	699	696.5
	0.921	697.5	700.5	698.5
	0.922	694.5	699	699.5
	0.923	693	698.5	697.5
	0.924	693	697.5	697.5
	0.925	695	697.5	700
	0.926	696.5	696.5	696.5
	0.927	696.5	698.5	697
	0.928	699	696.5	702
	0.929	695.5	698	699
	0.93	693	695.5	697.5
	0.931	695	696	696
	0.932	692.5	692.5	695
	0.933	696.5	698	697.5
	0.934	696.5	697	693
	0.935	695	696	697
	0.936	697	693	701
	0.937	698	700	696.5
	0.938	696.5	697	697
	0.939	696.5	697.5	698
	0.94	697.5	696	698
	0.941	696.5	696	694
	0.942	694	698.5	698
	0.943	696.5	697.5	698.5
	0.944	695.5	697	703
	0.945	694.5	698	699
	0.946	698.5	697.5	696.5
	0.947	696	699.5	697
	0.948	695.5	696	697.5
	0.949	696.5	695	698
	0.95	695.5	697	697
	0.951	700.5	697.5	700
	0.952	696	693	696.5
	0.953	697.5	697.5	697
	0.954	696	696.5	697.5
	0.955	692.5	696	696
	0.956	697	698	695
	0.957	697.5	700	695
	0.958	697.5	697	695.5
	0.959	694	695.5	694
	0.96	697.5	694.5	699.5
	0.961	697.5	697	697.5
	0.962	697.5	697.5	694.5
	0.963	694.5	697.5	695.5
	0.964	693	697.5	697.5
	0.965	696	698	696.5
	0.966	693	697.5	698.5
	0.967	697	697.5	697.5
	0.968	697	700.5	697
	0.969	696	697	696
	0.97	697.5	697.5	697.5
	0.971	695.5	698	695.5
	0.972	697.5	699.5	698.5
	0.973	697.5	696.5	698.5
	0.974	695.5	694	696.5
	0.975	696	699	697.5
	0.976	696	697.5	698
	0.977	697.5	698	698
	0.978	696.5	697	697.5
	0.979	693	696	693
	0.98	697.5	698	697
	0.981	694.5	699	696
	0.982	697	696	694
	0.983	698.5	697	696
	0.984	694	696.5	697
	0.985	698	695	698
	0.986	696.5	697	697.5
	0.987	696.5	697	697.5
	0.988	698	693	697.5
	0.989	694	696	696.5
	0.99	696	697.5	695
	0.991	695	695.5	698.5
	0.992	695.5	699	698
	0.993	694	697	696.5
	0.994	697.5	697.5	697
	0.995	697	697	698.5
	0.996	697	700.5	695
	0.997	698.5	697.5	694.5
	0.998	694.5	700	693
	0.999	695	698.5	697
	1	699	697	694.5
	1.001	697	695	696
	1.002	696	698	699
	1.003	696.5	697.5	697
	1.004	699	697	696
	1.005	690.5	692	697.5
	1.006	694.5	693	695
	1.007	695.5	695.5	697
	1.008	693	697.5	699.5
	1.009	698	696.5	699
	1.01	696	697	696.5
	1.011	697	696	697.5
	1.012	697	697.5	696
	1.013	693	696.5	697
	1.014	693	691	696
	1.015	696.5	695.5	695.5
	1.016	697	696	697.5
	1.017	698	696.5	697.5
	1.018	696.5	694.5	696.5
	1.019	700	698.5	696.5
	1.02	697.5	693	697.5
	1.021	697.5	693	698.5
	1.022	696.5	690.5	694.5
	1.023	698	695	695
	1.024	693	696	699
	1.025	700.5	696	695
	1.026	697	695	695.5
	1.027	696	695	697
	1.028	696.5	693	696
	1.029	695.5	695	697.5
	1.03	697	696.5	699.5
	1.031	696	693	696.5
	1.032	696	693	695
	1.033	694.5	696.5	694
	1.034	696.5	693	693
	1.035	699	692	697
	1.036	695.5	695.5	698.5
	1.037	695.5	695.5	697.5
	1.038	699.5	696.5	698.5
	1.039	698.5	693	696
	1.04	699.5	692	697.5
	1.041	697	692.5	696.5
	1.042	696	692	696.5
	1.043	697	693	694
	1.044	699.5	696	695
	1.045	698.5	690.5	697
	1.046	697.5	693	696
	1.047	694	691	694
	1.048	701.5	693	696.5
	1.049	698.5	694.5	697.5
	1.05	697.5	693	696.5
	1.051	699.5	694.5	697.5
	1.052	702.5	690.5	697.5
	1.053	698	694	697.5
	1.054	701	693	695
	1.055	696	693.5	696
	1.056	697	693	699
	1.057	698.5	692	694.5
	1.058	697	692	694
	1.059	699	691	695.5
	1.06	697.5	693	697.5
	1.061	697.5	692	695
	1.062	696	691	699
	1.063	694.5	695	697.5
	1.064	697.5	696	699.5
	1.065	694.5	694	692.5
	1.066	697	691	696
	1.067	696.5	691	699.5
	1.068	699	692.5	695
	1.069	696	691.5	697.5
	1.07	697.5	694	696
	1.071	696	693	696.5
	1.072	697.5	693	698.5
	1.073	697.5	697	697.5
	1.074	695.5	695	696.5
	1.075	693	693	694
	1.076	696	692	695
	1.077	696.5	696.5	698
	1.078	698	693	695
	1.079	698.5	694.5	697.5
	1.08	697.5	697.5	697.5
	1.081	696	695	694
	1.082	693.5	695.5	695.5
	1.083	694.5	691.5	699
	1.084	697.5	693	696.5
	1.085	698	693	696.5
	1.086	696	693	696
	1.087	696.5	695.5	697.5
	1.088	696	697	696
	1.089	693	695	694.5
	1.09	696	693	694
	1.091	696.5	696.5	696
	1.092	696	697.5	695.5
	1.093	695	697.5	695
	1.094	695	690.5	696.5
	1.095	697.5	700	697
	1.096	695.5	694	696.5
	1.097	693	697	694.5
	1.098	693	695.5	694.5
	1.099	693	697	696
	1.1	695	693	696
	1.101	695	696	695.5
	1.102	694.5	696	693
	1.103	693	696	696
	1.104	697	696	694.5
	1.105	695	698	692.5
	1.106	697	696.5	697.5
	1.107	692	695	697
	1.108	695.5	697.5	696.5
	1.109	693	697.5	700.5
	1.11	697.5	696	695.5
	1.111	690.5	696.5	694
	1.112	698.5	693	695.5
	1.113	692.5	695	695.5
	1.114	694	697.5	697.5
	1.115	693	697.5	694.5
	1.116	691	699	697.5
	1.117	695.5	697	697.5
	1.118	696.5	703	698
	1.119	691	695	699
	1.12	696.5	697	697
	1.121	688.5	693	697.5
	1.122	695	697	698.5
	1.123	691.5	697.5	698.5
	1.124	697.5	697	692
	1.125	692	696	696
	1.126	695	697	694.5
	1.127	693	698.5	697.5
	1.128	695	698	699
	1.129	692.5	697.5	698
	1.13	693	698.5	696.5
	1.131	695	700.5	697.5
	1.132	696.5	697.5	696
	1.133	696.5	700.5	690.5
	1.134	695.5	694.5	697.5
	1.135	693	697	694.5
	1.136	691	697.5	693.5
	1.137	695	697.5	695
	1.138	698.5	698.5	697.5
	1.139	698.5	699	695.5
	1.14	697.5	695	697.5
	1.141	696.5	698	699.5
	1.142	693	697	699.5
	1.143	696.5	696	698.5
	1.144	695	696.5	697
	1.145	693	696.5	697
	1.146	698	695	697.5
	1.147	697	697	696
	1.148	697.5	697.5	695.5
	1.149	697.5	697.5	697.5
	1.15	698	699	692.5
	1.151	697.5	697.5	695.5
	1.152	699	699.5	697.5
	1.153	699.5	700	696
	1.154	694.5	699.5	696.5
	1.155	698.5	698.5	697
	1.156	695.5	697	698.5
	1.157	693	695.5	697
	1.158	699	695.5	698
	1.159	698	695.5	696.5
	1.16	698.5	699	697
	1.161	695.5	696	696.5
	1.162	697	694.5	698
	1.163	697	697	696
	1.164	700.5	697.5	697
	1.165	698	697.5	697
	1.166	703	695	696
	1.167	697.5	695.5	695.5
	1.168	701	696.5	694.5
	1.169	700	695	696
	1.17	697.5	694.5	697.5
	1.171	696.5	696	696
	1.172	698.5	697.5	695
	1.173	701.5	696.5	700.5
	1.174	696.5	694	698
	1.175	699	696	699.5
	1.176	698	697	700
	1.177	696	695.5	699.5
	1.178	697.5	694	695.5
	1.179	697.5	697	697
	1.18	697.5	693	700.5
	1.181	700.5	696.5	695.5
	1.182	700	697	699
	1.183	696.5	695	698.5
	1.184	696	698	696
	1.185	697	693	697.5
	1.186	699	693	697.5
	1.187	700.5	696	697
	1.188	698	695.5	696
	1.189	698	692	697.5
	1.19	697.5	700	697
	1.191	698.5	696.5	697.5
	1.192	697.5	696	697.5
	1.193	697.5	698.5	698
	1.194	693	699	698.5
	1.195	698.5	695	701.5
	1.196	697.5	695.5	701.5
	1.197	697.5	695.5	697.5
	1.198	696.5	699	699.5
	1.199	697.5	695	701
	1.2	694.5	696.5	696
	1.201	697.5	698	697.5
	1.202	697	694	697
	1.203	698.5	695	698.5
	1.204	699	695	699.5
	1.205	692.5	694	699.5
	1.206	695	699	699
	1.207	696.5	696.5	697
	1.208	698	697.5	697
	1.209	696	698	699
	1.21	696.5	697.5	697
	1.211	694.5	695	699
	1.212	693	693	700.5
	1.213	694.5	696	696.5
	1.214	693	695.5	700.5
	1.215	695	697.5	697.5
	1.216	696	698	695.5
	1.217	692	696	700.5
	1.218	693	696.5	697.5
	1.219	693	696.5	697
	1.22	696	697.5	697.5
	1.221	693	697.5	696
	1.222	692	697.5	697
	1.223	695.5	695.5	698
	1.224	693	697.5	695
	1.225	693	694	700
	1.226	693	695.5	697.5
	1.227	695	696	697.5
	1.228	690.5	696	693
	1.229	690.5	699	697.5
	1.23	692.5	696	698
	1.231	693	700.5	700
	1.232	694	694.5	696
	1.233	694	695	697
	1.234	697	699.5	700.5
	1.235	693	700	694
	1.236	696.5	697.5	697.5
	1.237	692	697	699
	1.238	696.5	698.5	695.5
	1.239	693	697	696.5
	1.24	695.5	698.5	696.5
	1.241	697	695	691.5
	1.242	695	700	695.5
	1.243	690.5	697.5	693
	1.244	696	701.5	695
	1.245	696.5	693	692.5
	1.246	695	701.5	693
	1.247	696	700.5	697.5
	1.248	696.5	698.5	695
	1.249	695.5	694	696.5
	1.25	698	700	691
	1.251	697.5	697	692
	1.252	696.5	698.5	694
	1.253	695	697.5	697.5
	1.254	699.5	696	696.5
	1.255	699.5	697	693
	1.256	698.5	699	693
	1.257	698.5	695	695
	1.258	696.5	699	694.5
	1.259	697.5	699.5	694.5
	1.26	697.5	699.5	696
	1.261	698.5	696	693
	1.262	696.5	700.5	693
	1.263	697	700	697
	1.264	698.5	700.5	692
	1.265	700.5	695.5	695
	1.266	699.5	701.5	693
	1.267	698	698	695.5
	1.268	697	700.5	695
	1.269	702.5	698	693.5
	1.27	700.5	697.5	695.5
	1.271	696	699.5	692.5
	1.272	698.5	698.5	697
	1.273	698.5	697.5	690.5
	1.274	694.5	700	695
	1.275	698.5	701.5	695
	1.276	698.5	700.5	691.5
	1.277	696	698	693
	1.278	696	698.5	692
	1.279	696.5	697.5	689.5
	1.28	697.5	699	694
	1.281	695.5	699.5	693
	1.282	696	700.5	693
	1.283	697	700	688
	1.284	698.5	697	695.5
	1.285	700	698	693
	1.286	698.5	699	692
	1.287	698	698.5	693
	1.288	698	701.5	698
	1.289	696.5	697	691.5
	1.29	697.5	698.5	695.5
	1.291	698.5	696.5	689.5
	1.292	693	701	695
	1.293	693	699	696
	1.294	697	697.5	697
	1.295	696	699	695
	1.296	698.5	698	691.5
	1.297	694	698	693
	1.298	697.5	698.5	695
	1.299	693	697.5	693
	1.3	695	697.5	695.5
	1.301	697	697	696
	1.302	697.5	699.5	694.5
	1.303	697.5	699	693
	1.304	693.5	697	693
	1.305	694.5	695	696.5
	1.306	693	697.5	693
	1.307	696	700	693
	1.308	697	698	694.5
	1.309	693	697.5	697
	1.31	696	697.5	694.5
	1.311	697	696.5	693
	1.312	697	696.5	698.5
	1.313	698.5	697	695.5
	1.314	698	700	695.5
	1.315	692.5	700	698
	1.316	695	697.5	695.5
	1.317	695	700.5	695
	1.318	692	696.5	693
	1.319	696	699	697.5
	1.32	696.5	697	696
	1.321	697.5	700.5	698.5
	1.322	695.5	694.5	698.5
	1.323	697.5	699.5	692
	1.324	697.5	699.5	697
	1.325	696.5	698.5	692.5
	1.326	696.5	697	694.5
	1.327	695.5	697	700.5
	1.328	698.5	700	696
	1.329	697.5	697.5	696
	1.33	699	698	698.5
	1.331	697	697	696.5
	1.332	699	693	696.5
	1.333	699.5	697.5	698.5
	1.334	698.5	696.5	695.5
	1.335	697.5	697.5	693
	1.336	701.5	698.5	697
	1.337	699	699.5	694.5
	1.338	698.5	698.5	699
	1.339	697	697	695.5
	1.34	698.5	693	698
	1.341	701.5	697.5	697.5
	1.342	695.5	697.5	696.5
	1.343	700.5	695.5	697
	1.344	700	697.5	697
	1.345	698.5	694	699
	1.346	702.5	696	697.5
	1.347	698.5	697	697.5
	1.348	696.5	694	697.5
	1.349	699.5	697	697.5
	1.35	699	698	697
	1.351	699	695.5	697
	1.352	699	696	697.5
	1.353	703	696	696
	1.354	699.5	700.5	699.5
	1.355	700	695	698.5
	1.356	701	697.5	698.5
	1.357	698	699.5	697.5
	1.358	699.5	696	698
	1.359	698.5	696	697
	1.36	701.5	694.5	697.5
	1.361	701	693	698
	1.362	702.5	695	700
	1.363	699	698.5	698
	1.364	697	696	699.5
	1.365	696	696	700
	1.366	700	697.5	698.5
	1.367	699	695	700
	1.368	696.5	697	698.5
	1.369	700.5	695	700.5
	1.37	697.5	696	700.5
	1.371	700	691	700
	1.372	697	695	700
	1.373	697	695	698
	1.374	697	695	702.5
	1.375	698	693	698.5
	1.376	699.5	691.5	702
	1.377	697.5	691	699
	1.378	697.5	693	703.5
	1.379	702	697.5	698
	1.38	697.5	694.5	698.5
	1.381	700	697.5	699
	1.382	695	695	698
	1.383	697	697.5	702
	1.384	698.5	690.5	698
	1.385	698.5	696	700.5
	1.386	698.5	695.5	700
	1.387	697.5	693	699.5
	1.388	694	692.5	698
	1.389	700.5	694.5	696.5
	1.39	696.5	691.5	702
	1.391	697.5	697.5	700
	1.392	696	694	702.5
	1.393	692	692	698
	1.394	695	693	698
	1.395	695	695.5	700
	1.396	698.5	692	697
	1.397	694	693	700.5
	1.398	693	694	699
	1.399	694.5	693	700
	1.4	695.5	694.5	697.5
	1.401	693	696.5	694.5
	1.402	695	694	698
	1.403	697.5	695	695
	1.404	695	693	697.5
	1.405	694.5	693	695
	1.406	695	691	700.5
	1.407	698	693	697
	1.408	693	693	696
	1.409	697.5	693	699
	1.41	693	696.5	698
	1.411	694.5	693	698
	1.412	693	694.5	697
	1.413	691	695	695.5
	1.414	693	691	697
	1.415	691	694	699
	1.416	693	693	697.5
	1.417	695	693	698.5
	1.418	697	694.5	694.5
	1.419	691	692.5	695.5
	1.42	693	693	698.5
	1.421	694.5	696.5	697
	1.422	692.5	696.5	697.5
	1.423	691.5	697.5	697
	1.424	695	696	697.5
	1.425	694.5	696.5	695
	1.426	693	693	696
	1.427	695	697	691.5
	1.428	695.5	696	695.5
	1.429	695.5	694.5	695
	1.43	694.5	694	692.5
	1.431	693	694.5	694.5
	1.432	696	694	692.5
	1.433	691	695.5	696
	1.434	693	696	697
	1.435	694	694.5	695
	1.436	695.5	696.5	691.5
	1.437	696	695	695
	1.438	692.5	694.5	693
	1.439	690	697.5	693
	1.44	693	695.5	694.5
	1.441	695.5	694.5	693
	1.442	693	692.5	691
	1.443	695	695.5	691
	1.444	696.5	696.5	695
	1.445	697.5	694.5	696.5
	1.446	696	691	693
	1.447	695.5	698	692.5
	1.448	693	692	692.5
	1.449	693	695	693
	1.45	695	698	694
	1.451	696.5	696	691
	1.452	697.5	696.5	692
	1.453	697	695	692.5
	1.454	697.5	697.5	693
	1.455	694	695	694
	1.456	697.5	696	692
	1.457	697	695	694.5
	1.458	696.5	696.5	692
	1.459	697.5	693	696
	1.46	698	693	696
	1.461	699	697.5	698.5
	1.462	697	696	694.5
	1.463	698.5	694.5	695.5
	1.464	697	697.5	694
	1.465	697.5	693	693
	1.466	696.5	697.5	693
	1.467	696	698	693
	1.468	699	696.5	692.5
	1.469	698	698.5	693
	1.47	697.5	697.5	696
	1.471	697.5	697	695
	1.472	697.5	697.5	692.5
	1.473	700	700	694
	1.474	700.5	701.5	693
	1.475	700.5	696	694.5
	1.476	700.5	699	697.5
	1.477	700	697.5	697
	1.478	698	701.5	692
	1.479	697	696	695
	1.48	697.5	698	697.5
	1.481	699	698.5	697
	1.482	696	700	693
	1.483	697.5	701.5	695.5
	1.484	698.5	701.5	696
	1.485	700	699.5	692
	1.486	697.5	697.5	695.5
	1.487	697	704.5	698.5
	1.488	697	700.5	698.5
	1.489	698	701.5	694
	1.49	697	703	697.5
	1.491	700	701	695
	1.492	700.5	699.5	698
	1.493	701.5	701	695.5
	1.494	701	701	697
	1.495	696.5	697.5	698.5
	1.496	697.5	699.5	701.5
	1.497	695.5	700	698
	1.498	693	698	697.5
	1.499	697	700.5	697
	1.5	695.5	700	699
	1.501	698.5	700.5	696
	1.502	693	697.5	699.5
	1.503	694.5	699	700
	1.504	699.5	700	697.5
	1.505	697.5	700.5	701
	1.506	692	700.5	699
	1.507	696	701.5	699
	1.508	697	698	700.5
	1.509	697.5	699	699.5
	1.51	697.5	701.5	698
	1.511	696.5	697	694.5
	1.512	696.5	696	702.5
	1.513	697	696	697
	1.514	695	697	698
	1.515	696	698	697
	1.516	696.5	697	702.5
	1.517	696	695.5	700
	1.518	692.5	700.5	697
	1.519	695	697.5	698.5
	1.52	696	697.5	702
	1.521	694	698	698
	1.522	696	693	700.5
	1.523	695	694.5	700
	1.524	693	696	699
	1.525	693	697	697.5
	1.526	689.5	693	700
	1.527	693	697	700.5
	1.528	693	693	700
	1.529	693	697	700.5
	1.53	696	700.5	695.5
	1.531	695	697	697.5
	1.532	696	696.5	701.5
	1.533	695	697	700
	1.534	694	695	696.5
	1.535	692	693	700
	1.536	693	692.5	696.5
	1.537	694.5	691.5	697.5
	1.538	696.5	697	698
	1.539	697.5	693	697
	1.54	694.5	691	697.5
	1.541	693	692	695
	1.542	695	695.5	697.5
	1.543	693	693	697
	1.544	693	693	697.5
	1.545	695	693	698
	1.546	694.5	695	700.5
	1.547	693	692	697.5
	1.548	692.5	687.5	697.5
	1.549	695	695	696.5
	1.55	695	695	698
	1.551	695	696	702
	1.552	697	691.5	698
	1.553	694.5	690.5	698
	1.554	694.5	691	693
	1.555	694.5	694.5	699
	1.556	698	693	697.5
	1.557	697.5	693	699
	1.558	696	693	697.5
	1.559	698.5	692	698
	1.56	696.5	692.5	697.5
	1.561	699.5	695.5	697.5
	1.562	700	695	695
	1.563	697.5	694	697.5
	1.564	696	692.5	697
	1.565	699.5	688.5	701
	1.566	698	693	696.5
	1.567	694.5	693	697
	1.568	698	695.5	697.5
	1.569	698	693	693
	1.57	697	691	697
	1.571	697.5	694	695
	1.572	698	694.5	696.5
	1.573	699.5	694.5	697
	1.574	699.5	692	695.5
	1.575	696	696	697.5
	1.576	695.5	689.5	697.5
	1.577	697	694	697.5
	1.578	701.5	694.5	696
	1.579	697	696	698
	1.58	697.5	696	698.5
	1.581	701.5	692.5	698
	1.582	698.5	693	695
	1.583	700.5	697.5	697.5
	1.584	695.5	698	697.5
	1.585	698	697	697
	1.586	697.5	693	699.5
	1.587	699	695.5	697.5
	1.588	697.5	692	699
	1.589	700.5	693	695
	1.59	696	692	696
	1.591	695	696	697.5
	1.592	696.5	697	699.5
	1.593	700	695	695.5
	1.594	697.5	694.5	698.5
	1.595	702.5	693	697
	1.596	696	694.5	697
	1.597	700	693	695.5
	1.598	697.5	694	695
	1.599	700	692	693
	1.6	697	691.5	693
	1.601	696.5	696.5	697.5
	1.602	698.5	696	696.5
	1.603	699	695.5	696
	1.604	698.5	694	696.5
	1.605	697.5	697.5	693
	1.606	697.5	691	694.5
	1.607	697.5	696	693
	1.608	698	694.5	695.5
	1.609	701	695.5	695
	1.61	697	693	694.5
	1.611	704	695.5	696.5
	1.612	700.5	694	696.5
	1.613	697.5	695	693
	1.614	700.5	693	694.5
	1.615	697.5	693	695.5
	1.616	698.5	695	697
	1.617	697.5	695	693
	1.618	702.5	691.5	696.5
	1.619	698.5	697.5	693
	1.62	700	693	693
	1.621	699.5	696	695
	1.622	703	695	695.5
	1.623	696.5	694.5	694
	1.624	697.5	695	697
	1.625	700.5	695.5	693
	1.626	698.5	692.5	693
	1.627	697.5	697.5	694
	1.628	699.5	695.5	695
	1.629	699.5	696.5	698
	1.63	700.5	697.5	696.5
	1.631	697.5	696.5	697.5
	1.632	702	699.5	693.5
	1.633	701	696	693
	1.634	699.5	699.5	697
	1.635	698.5	695.5	697.5
	1.636	698	695.5	695
	1.637	702	697.5	695
	1.638	700	697.5	695.5
	1.639	699.5	695	692
	1.64	699	696.5	695.5
	1.641	697.5	697	697
	1.642	697.5	697.5	693
	1.643	698.5	697.5	695
	1.644	700.5	697.5	695.5
	1.645	701.5	697.5	697
	1.646	703	699	694
	1.647	698.5	696	692.5
	1.648	699	699	693
	1.649	702	697.5	694
	1.65	700	700	697.5
	1.651	697.5	700.5	695.5
	1.652	698	695.5	691
	1.653	700.5	697	697
	1.654	702.5	701	699.5
	1.655	702	699	697.5
	1.656	701.5	697	696
	1.657	702.5	697.5	693
	1.658	697	699.5	697
	1.659	698	697.5	695
	1.66	698.5	700.5	695.5
	1.661	700	699	694.5
	1.662	697.5	699	696.5
	1.663	697	697	692.5
	1.664	698.5	698.5	693
	1.665	699	697.5	695
	1.666	698	701.5	692.5
	1.667	699.5	697	695
	1.668	702.5	694.5	692
	1.669	697.5	700.5	695.5
	1.67	697.5	698	692.5
	1.671	698.5	700	695
	1.672	701.5	701.5	692
	1.673	699.5	697	695
	1.674	699.5	695	694.5
	1.675	700	698.5	694.5
	1.676	697.5	700.5	696.5
	1.677	700.5	701	694.5
	1.678	699.5	701	693
	1.679	698.5	702	693
	1.68	698	701	693
	1.681	701	703	694.5
	1.682	701.5	699	695
	1.683	701.5	699.5	697
	1.684	700.5	700.5	694
	1.685	702	700	694
	1.686	703.5	698	694
	1.687	700.5	697.5	691
	1.688	699.5	698.5	693
	1.689	705	698	695.5
	1.69	701.5	700.5	697.5
	1.691	703	702.5	693
	1.692	703	699	695
	1.693	703	701.5	693
	1.694	699	699.5	690.5
	1.695	700.5	697.5	696.5
	1.696	698	698	694.5
	1.697	703.5	696	691
	1.698	700.5	698.5	696
	1.699	702.5	700	689
	1.7	699.5	697.5	695.5
	1.701	700.5	698.5	696
	1.702	701.5	697	695.5
	1.703	699.5	702	695
	1.704	697.5	698	695.5
	1.705	693	696	691.5
	1.706	697.5	697.5	690.5
	1.707	700	697.5	689
	1.708	695	696	687.5
	1.709	698.5	697.5	687.5
	1.71	697.5	697.5	687
	1.711	695	700	690.5
	1.712	696.5	698.5	690
	1.713	692.5	696.5	685.5
	1.714	692	697	687
	1.715	693	697	681.5
	1.716	689.5	699	681.5
	1.717	693	696	682.5
	1.718	692	695.5	682
	1.719	689.5	697	679
	1.72	688	695	677
	1.721	689.5	696	675
	1.722	687.5	697	674
	1.723	685.5	699	676.5
	1.724	687	700	675
	1.725	685.5	698	671.5
	1.726	685.5	694.5	669.5
	1.727	683	698	669
	1.728	679.5	693	665.5
	1.729	677	696	665.5
	1.73	678	697.5	663.5
	1.731	673.5	697.5	664.5
	1.732	674	698	659.5
	1.733	676.5	692	658
	1.734	669	697	657
	1.735	667.5	696.5	654
	1.736	665	697.5	654
	1.737	660	695.5	650.5
	1.738	661.5	695.5	648
	1.739	660.5	690.5	647
	1.74	657.5	697	645.5
	1.741	653	695	638
	1.742	652	697.5	641
	1.743	648.5	697	639
	1.744	646.5	698.5	636
	1.745	642.5	697.5	635.5
	1.746	642	697	632.5
	1.747	636	697.5	628
	1.748	632.5	697	626.5
	1.749	629.5	697.5	623
	1.75	624	692	623
	1.751	624.5	694.5	625.5
	1.752	618.5	697.5	618
	1.753	613	697	617
	1.754	614	696.5	613
	1.755	605.5	696.5	613
	1.756	603.5	697.5	608.5
	1.757	597	700	606.5
	1.758	596	695	601
	1.759	588.5	692	601.5
	1.76	588	697	599.5
	1.761	581	690.5	595
	1.762	578.5	695	590
	1.763	575.5	696	588
	1.764	571.5	695	588.5
	1.765	567.5	696.5	588
	1.766	561.5	695.5	586
	1.767	559	696	581.5
	1.768	554	693	576
	1.769	551	693	575
	1.77	548	695	572
	1.771	543	693	569.5
	1.772	538	697.5	567
	1.773	536	695	565
	1.774	533	696.5	558.5
	1.775	529	696.5	556
	1.776	525.5	695	556
	1.777	518.5	696.5	549.5
	1.778	517	693	546.5
	1.779	513	694.5	547
	1.78	509.5	697	541
	1.781	506	697.5	539
	1.782	500.5	695	533
	1.783	499	699	528
	1.784	502	693	529
	1.785	491	698.5	521.5
	1.786	493	697.5	517.5
	1.787	486	697.5	513
	1.788	485	697.5	509.5
	1.789	480	697	506.5
	1.79	475.5	693	499
	1.791	473	697.5	496.5
	1.792	467	692	492.5
	1.793	462	695	487
	1.794	459.5	696	484.5
	1.795	453	695.5	481
	1.796	451.5	693	473.5
	1.797	446	696	468.5
	1.798	443.5	697	462.5
	1.799	437.5	696	460
	1.8	431	697.5	454.5
	1.801	432	695	448.5
	1.802	421	697	444
	1.803	418	693	439.5
	1.804	414.5	698	432.5
	1.805	409	700.5	429.5
	1.806	404	696.5	421.5
	1.807	399.5	697	417
	1.808	391	694	409.5
	1.809	387.5	700	399
	1.81	381	696	397.5
	1.811	375.5	695	389.5
	1.812	370.5	694.5	384
	1.813	360.5	695.5	376
	1.814	357.5	693	374.5
	1.815	350	693	364
	1.816	344.5	699.5	358.5
	1.817	338.5	694.5	351.5
	1.818	329.5	696	342.5
	1.819	326	697.5	340.5
	1.82	319	693	330.5
	1.821	306.5	695	327
	1.822	301.5	699	321
	1.823	297.5	694.5	313.5
	1.824	291	696	308
	1.825	286.5	698.5	302.5
	1.826	279.5	696.5	298.5
	1.827	268	696.5	288
	1.828	265.5	697	284.5
	1.829	256	697.5	277
	1.83	252.5	696.5	271.5
	1.831	242	693	266
	1.832	238.5	695	262
	1.833	229.5	696.5	253
	1.834	223.5	696.5	254.5
	1.835	218.5	696.5	247
	1.836	215.5	697	241
	1.837	208.5	700	234.5
	1.838	206	697.5	230
	1.839	200	698.5	232
	1.84	196.5	698.5	222
	1.841	189.5	693	222
	1.842	187	696.5	219.5
	1.843	184.5	697.5	215.5
	1.844	175	693	209.5
	1.845	172	696	208.5
	1.846	169.5	697.5	207.5
	1.847	167.5	693	199
	1.848	161.5	696.5	200
	1.849	158.5	697	197.5
	1.85	152.5	699	194
	1.851	150.5	695	186.5
	1.852	144	696.5	186.5
	1.853	142.5	697.5	189
	1.854	141.5	700.5	180.5
	1.855	134	697.5	180
	1.856	132.5	697.5	179
	1.857	131.5	697	177.5
	1.858	130	696	176
	1.859	125.5	698	174.5
	1.86	124	699.5	172
	1.861	122	696	170
	1.862	117.5	698.5	166.5
	1.863	118	696	166.5
	1.864	112.5	696	164.5
	1.865	114	693	162.5
	1.866	110.5	699.5	163.5
	1.867	110.5	699	158
	1.868	105.5	698.5	157
	1.869	107	699	155.5
	1.87	109.5	696.5	157.5
	1.871	102.5	697.5	154
	1.872	102	698.5	152.5
	1.873	101.5	698.5	151.5
	1.874	97.5	697.5	149
	1.875	101.5	698.5	153.5
	1.876	99	695	147.5
	1.877	99.5	694.5	146.5
	1.878	97.5	697.5	147
	1.879	93	697.5	146.5
	1.88	94	698	141
	1.881	91.5	697.5	143.5
	1.882	93	697	143.5
	1.883	91	695.5	144.5
	1.884	88	697.5	140.5
	1.885	91	695.5	143.5
	1.886	85	695	138.5
	1.887	88.5	696.5	141
	1.888	90.5	695	138.5
	1.889	85.5	691	140.5
	1.89	90.5	695	140
	1.891	90	698.5	141
	1.892	88.5	695.5	133
	1.893	89	697	143
	1.894	92.5	697	139
	1.895	89	699	140.5
	1.896	93	694.5	139.5
	1.897	89.5	695	144.5
	1.898	91.5	701	141.5
	1.899	91	696	139
	1.9	96	693	141
	1.901	95.5	700	146.5
	1.902	95.5	699	146.5
	1.903	97.5	696	143
	1.904	102	696	148.5
	1.905	100.5	693	147.5
	1.906	100.5	697.5	149
	1.907	103.5	695	148
	1.908	105	700	147.5
	1.909	107.5	697	149.5
	1.91	109.5	693	150
	1.911	109.5	695.5	151
	1.912	115	696	153.5
	1.913	110.5	698	156.5
	1.914	114	700	155
	1.915	118	697	156
	1.916	118.5	697.5	158
	1.917	122	698	161
	1.918	123	696.5	162
	1.919	125.5	695	158
	1.92	125.5	696	162
	1.921	131	697.5	163
	1.922	133.5	697	161.5
	1.923	134.5	699	165
	1.924	136.5	693	166
	1.925	139.5	698	167.5
	1.926	140	697	163
	1.927	148.5	696.5	168.5
	1.928	151.5	696.5	168
	1.929	152.5	694	169.5
	1.93	159	698.5	167
	1.931	164	694.5	168.5
	1.932	165	696.5	168.5
	1.933	170	697	169.5
	1.934	172	697	171
	1.935	173	698.5	169
	1.936	175	698.5	172
	1.937	177.5	699.5	171
	1.938	177.5	700	175.5
	1.939	181.5	701.5	174
	1.94	184	699	175
	1.941	185.5	699	177.5
	1.942	182	696	174
	1.943	187	699.5	177.5
	1.944	186	696	175
	1.945	186	698.5	178
	1.946	188.5	700	181.5
	1.947	184.5	697.5	178
	1.948	190	696.5	182
	1.949	186.5	695.5	183
	1.95	187	698.5	180.5
	1.951	188.5	697.5	183.5
	1.952	191.5	696.5	183.5
	1.953	189	698	186
	1.954	190	701.5	187.5
	1.955	187	700.5	189.5
	1.956	190.5	700.5	193.5
	1.957	193.5	697.5	193
	1.958	197	699.5	192
	1.959	202.5	698.5	192.5
	1.96	208.5	698.5	194.5
	1.961	213	698	196.5
	1.962	215	696.5	198
	1.963	224	700.5	198
	1.964	223.5	700.5	200
	1.965	225.5	702	198
	1.966	229	698.5	199
	1.967	233.5	701	199.5
	1.968	232.5	701.5	200.5
	1.969	237.5	700.5	201
	1.97	236.5	697.5	202
	1.971	237	702.5	199
	1.972	239	699.5	200.5
	1.973	235.5	699.5	201.5
	1.974	236	697.5	200
	1.975	233	697	204
	1.976	234.5	700.5	201
	1.977	231	698.5	204
	1.978	236	698.5	205
	1.979	230.5	698	203.5
	1.98	228.5	703.5	206.5
	1.981	227	702.5	204
	1.982	227	701.5	208.5
	1.983	226	697	208.5
	1.984	223.5	702	211.5
	1.985	222	700.5	212
	1.986	223.5	700.5	214
	1.987	223	703.5	212.5
	1.988	222	701	214
	1.989	223	697.5	216
	1.99	220.5	701.5	218
	1.991	219.5	700	218.5
	1.992	224.5	700.5	218.5
	1.993	224.5	702.5	222.5
[truncated: 6,006 more rows]

## Sheet: D
DataTypeVer2.0	Time	Fz	Fz	Fz
NumberOfData		8000	8000	8000
PreTriggerData		0	0	0
SamplingTime[ms]		1	1	1
DataLabel		O1:CMJ	O2:CMJ	O3:CMJ
DataUnit	sec	N	N	N
	0	633.5	631	636
	0.001	632	633	636.5
	0.002	631	632	639
	0.003	634	629.5	635.5
	0.004	634.5	632.5	634.5
	0.005	633.5	628.5	633
	0.006	634	632	636.5
	0.007	633.5	632	638.5
	0.008	634.5	634.5	635.5
	0.009	635.5	631.5	636
	0.01	635	634.5	635
	0.011	635.5	633	635.5
	0.012	634.5	634.5	638
	0.013	634.5	631.5	635
	0.014	634	632	631
	0.015	633.5	633.5	637
	0.016	633.5	630	633
	0.017	632.5	634.5	638
	0.018	634.5	631	636
	0.019	635.5	635.5	637
	0.02	633.5	633.5	632
	0.021	633	633	637.5
	0.022	636.5	632	632.5
	0.023	633.5	636	633.5
	0.024	632.5	633.5	636
	0.025	632	631.5	635
	0.026	633.5	633	635
	0.027	633	629.5	633.5
	0.028	633.5	630	631.5
	0.029	636	633.5	636
	0.03	634	635	633.5
	0.031	634.5	635.5	631.5
	0.032	635	636	636
	0.033	632	633	634.5
	0.034	635	634.5	635.5
	0.035	633	632.5	632.5
	0.036	635	635	634
	0.037	631	629.5	635
	0.038	634.5	633.5	633.5
	0.039	631.5	633.5	636.5
	0.04	633.5	634	632.5
	0.041	635.5	635	635.5
	0.042	635.5	634.5	636.5
	0.043	636	632	636
	0.044	636	636	634
	0.045	633	630	633.5
	0.046	631.5	636	632
	0.047	635.5	635.5	636
	0.048	635.5	633.5	634
	0.049	636.5	635.5	634
	0.05	635.5	634.5	636
	0.051	634	630.5	634.5
	0.052	639	633.5	633
	0.053	633.5	634	636
	0.054	631	632.5	635.5
	0.055	636	632	633.5
	0.056	634.5	637.5	633.5
	0.057	635	629	638
	0.058	635.5	633	636
	0.059	633.5	631.5	634
	0.06	634.5	629.5	636
	0.061	635.5	629.5	632.5
	0.062	634.5	635	636
	0.063	633.5	633.5	632.5
	0.064	632	632	635.5
	0.065	632.5	633	636
	0.066	635.5	634	631.5
	0.067	636	633.5	636
	0.068	629.5	630.5	635
	0.069	636	634.5	636
	0.07	635	634	636
	0.071	635.5	633	634
	0.072	636.5	631	635
	0.073	637.5	633.5	633.5
	0.074	634	631	633.5
	0.075	632.5	630	634
	0.076	635	631	631
	0.077	636.5	633	637
	0.078	635	631	633
	0.079	635.5	631.5	632.5
	0.08	635.5	630.5	635.5
	0.081	636.5	631.5	634.5
	0.082	636	632	634.5
	0.083	633	631.5	630
	0.084	635	628	633
	0.085	636.5	631.5	633.5
	0.086	634	629.5	631.5
	0.087	634	630.5	633
	0.088	635.5	635.5	629
	0.089	633	631	633.5
	0.09	631.5	629	632
	0.091	635	631.5	631.5
	0.092	631.5	632	632
	0.093	632.5	630.5	633
	0.094	632.5	632	632.5
	0.095	635.5	631.5	632
	0.096	630	631.5	629.5
	0.097	630	629	629
	0.098	631.5	631	631
	0.099	632.5	632.5	627.5
	0.1	627	629	629
	0.101	629	629.5	633.5
	0.102	631.5	632	630.5
	0.103	631.5	631.5	626.5
	0.104	631.5	630	629.5
	0.105	633.5	632.5	633.5
	0.106	629	631	629
	0.107	631.5	629	631
	0.108	629.5	631.5	633.5
	0.109	630	630	630
	0.11	631.5	628.5	632.5
	0.111	630.5	628.5	629
	0.112	630.5	629.5	629
	0.113	632	629	630.5
	0.114	630	630	629.5
	0.115	628.5	632.5	631.5
	0.116	629.5	633.5	629
	0.117	630.5	629.5	631
	0.118	627.5	632	632.5
	0.119	635.5	629	627.5
	0.12	631.5	632.5	633
	0.121	635	631	628
	0.122	629.5	633	629.5
	0.123	632.5	634.5	630.5
	0.124	636	630	628
	0.125	636	631.5	628
	0.126	634.5	632.5	632.5
	0.127	634	634.5	629.5
	0.128	631	635.5	626.5
	0.129	633.5	628.5	631.5
	0.13	635.5	633	630
	0.131	633	632.5	633
	0.132	634.5	632.5	629.5
	0.133	633.5	629	630.5
	0.134	634.5	632.5	628.5
	0.135	637	633	630.5
	0.136	634.5	630	634
	0.137	633	635.5	629
	0.138	632.5	636	632.5
	0.139	635	635.5	631.5
	0.14	634	632.5	630.5
	0.141	634.5	630	629.5
	0.142	635.5	634.5	630.5
	0.143	637	633.5	631.5
	0.144	631.5	633	630.5
	0.145	636	633.5	632.5
	0.146	633.5	632	632.5
	0.147	633	634.5	634.5
	0.148	634	631.5	630.5
	0.149	633.5	636.5	631.5
	0.15	634.5	629	631
	0.151	634.5	633	628.5
	0.152	635	632.5	630
	0.153	636	634	629
	0.154	636	635.5	630
	0.155	635	634.5	629.5
	0.156	635.5	632.5	629
	0.157	634.5	633	633
	0.158	633	631.5	629.5
	0.159	634.5	631.5	633.5
	0.16	633	631.5	630
	0.161	636	633	628.5
	0.162	632.5	633	631.5
	0.163	631.5	635	628
	0.164	633	629	629
	0.165	635	633.5	628
	0.166	634.5	631.5	631.5
	0.167	632.5	631.5	628
	0.168	632.5	632	631
	0.169	635.5	633.5	630
	0.17	634.5	630.5	628.5
	0.171	630	631.5	629.5
	0.172	637	630	630
	0.173	634.5	629.5	631
	0.174	634	633	629
	0.175	634.5	633.5	630.5
	0.176	634	635	632.5
	0.177	633.5	631	628.5
	0.178	631.5	630	631
	0.179	630	630.5	629.5
	0.18	636	634.5	629
	0.181	630.5	631.5	631.5
	0.182	631.5	630	630.5
	0.183	631.5	629	632.5
	0.184	632	631.5	632
	0.185	631.5	633.5	628.5
	0.186	630	633.5	628
	0.187	632.5	632	629.5
	0.188	629.5	630	629
	0.189	635.5	633.5	629
	0.19	634	628.5	630.5
	0.191	630.5	631.5	634.5
	0.192	632.5	630	631
	0.193	627	633.5	630.5
	0.194	633.5	631.5	633.5
	0.195	629	633.5	631.5
	0.196	631	629	632.5
	0.197	631.5	629	630
	0.198	632	634	632.5
	0.199	631.5	633.5	636
	0.2	633.5	633	635
	0.201	632.5	633.5	630.5
	0.202	631.5	636	632
	0.203	631	629	630.5
	0.204	633.5	633.5	630.5
	0.205	630.5	633	634.5
	0.206	631.5	631	633.5
	0.207	634.5	635.5	632.5
	0.208	632	631.5	633.5
	0.209	633.5	637	634.5
	0.21	629.5	636	636.5
	0.211	634.5	635.5	636
	0.212	632.5	634	634.5
	0.213	631.5	636	638
	0.214	631	635.5	636
	0.215	635.5	633.5	635.5
	0.216	635	635	639
	0.217	635	631	637
	0.218	635.5	633.5	636
	0.219	635.5	635	638.5
	0.22	633.5	633	636
	0.221	635.5	634.5	638
	0.222	636.5	634.5	638.5
	0.223	638	632.5	639
	0.224	636	638	636
	0.225	636.5	634	637.5
	0.226	639	638	637.5
	0.227	637.5	635	638
	0.228	635.5	635.5	638
	0.229	638	631.5	637.5
	0.23	636	636	636
	0.231	634.5	634.5	636.5
	0.232	636	634.5	634.5
	0.233	639	636	636
	0.234	636	631.5	636.5
	0.235	639	632.5	634.5
	0.236	637.5	636	636
	0.237	638	635.5	635.5
	0.238	637	632	637.5
	0.239	636	636.5	635
	0.24	637	633	638.5
	0.241	635	635.5	637.5
	0.242	638	636	634.5
	0.243	639	632	636.5
	0.244	635.5	634.5	635.5
	0.245	638	636	635.5
	0.246	637.5	636	636
	0.247	638	633	636
	0.248	634.5	635	634
	0.249	636.5	638	637
	0.25	638	634.5	635
	0.251	638.5	634.5	636.5
	0.252	636.5	635	634
	0.253	639	631.5	634.5
	0.254	635	636	638
	0.255	637.5	635.5	638.5
	0.256	636	636.5	635
	0.257	637.5	636	635
	0.258	639	630.5	637
	0.259	636	633.5	635
	0.26	637	633.5	637
	0.261	633.5	630.5	635.5
	0.262	634	639	637
	0.263	636.5	630	635.5
	0.264	630.5	633	636.5
	0.265	636	631.5	634.5
	0.266	637	631.5	635
	0.267	635.5	631.5	635.5
	0.268	639	632.5	634
	0.269	637.5	632.5	634.5
	0.27	637	630	634.5
	0.271	634.5	630	633.5
	0.272	636	629	632.5
	0.273	636	632	634.5
	0.274	638.5	630.5	633.5
	0.275	637	631	631.5
	0.276	635	631.5	636
	0.277	637.5	631.5	635.5
	0.278	635	631.5	629
	0.279	635.5	633	634.5
	0.28	636	631.5	635
	0.281	630	628.5	634.5
	0.282	639	628	635.5
	0.283	635.5	632.5	634
	0.284	635.5	629.5	631.5
	0.285	635.5	627.5	634
	0.286	636	629	631.5
	0.287	641.5	631	633.5
	0.288	637	631	631.5
	0.289	636	629.5	630.5
	0.29	634.5	629.5	632.5
	0.291	633.5	636	635
	0.292	637.5	631.5	628
	0.293	637.5	631.5	631
	0.294	638	634	632.5
	0.295	635	627.5	632
	0.296	636.5	629	633.5
	0.297	638	630.5	627.5
	0.298	635	633	630.5
	0.299	634.5	629.5	632.5
	0.3	634.5	633	628.5
	0.301	632.5	632	631.5
	0.302	637	631	633
	0.303	634.5	630	629.5
	0.304	635	631	632.5
	0.305	635.5	631.5	632
	0.306	636	632.5	630.5
	0.307	635.5	634.5	630.5
	0.308	634.5	635.5	629.5
	0.309	634	634	631.5
	0.31	635.5	631	632
	0.311	635	633.5	626.5
	0.312	632.5	634.5	630
	0.313	632.5	635	629
	0.314	633	631.5	631.5
	0.315	629.5	631	629.5
	0.316	631.5	631.5	631
	0.317	632	629	628
	0.318	629	633	630
	0.319	632	633	630.5
	0.32	629.5	629.5	633
	0.321	630.5	634	631.5
	0.322	630.5	631.5	630.5
	0.323	628	632.5	631
	0.324	631.5	631	631.5
	0.325	629.5	629.5	629
	0.326	628	633.5	634
	0.327	631.5	633.5	632
	0.328	632	633	627
	0.329	628.5	630	634
	0.33	633	634.5	630.5
	0.331	630	629.5	631
	0.332	631.5	629.5	634.5
	0.333	633.5	629.5	636
	0.334	630.5	630	634
	0.335	630.5	633.5	634.5
	0.336	629.5	630	631
	0.337	630.5	627.5	633
	0.338	630	631.5	630
	0.339	630.5	629	630.5
	0.34	629.5	628	632
	0.341	629	629	633.5
	0.342	633	631.5	631
	0.343	630.5	629	632.5
	0.344	632	624	630
	0.345	629	632	630.5
	0.346	633	629	633
	0.347	631.5	629.5	634.5
	0.348	629.5	630	631
	0.349	632.5	627.5	631.5
	0.35	629	627	633
	0.351	627.5	631.5	631
	0.352	629.5	627.5	635.5
	0.353	635.5	629.5	631
	0.354	629	630	630
	0.355	631	629	632.5
	0.356	629.5	630.5	629.5
	0.357	632.5	627	632
	0.358	627.5	629	634.5
	0.359	633	629	635
	0.36	629.5	633.5	630
	0.361	631.5	630.5	632
	0.362	632	626.5	629
	0.363	631.5	629	631.5
	0.364	635	629.5	634
	0.365	629	630	630
	0.366	634.5	629.5	631
	0.367	633	629.5	630.5
	0.368	631.5	631.5	633.5
	0.369	631	628.5	633.5
	0.37	633.5	629	634.5
	0.371	629.5	629	631
	0.372	631	628.5	635
	0.373	633	633.5	630.5
	0.374	635	631.5	630.5
	0.375	629	631.5	634.5
	0.376	631.5	633.5	631
	0.377	632.5	631	631.5
	0.378	634.5	629.5	634
	0.379	632	630	631.5
	0.38	634.5	632.5	634.5
	0.381	633.5	630	634
	0.382	629	630	630.5
	0.383	633	629.5	633.5
	0.384	631	632	632.5
	0.385	629	634	632.5
	0.386	631.5	627.5	631.5
	0.387	629.5	632.5	631.5
	0.388	632.5	632	636
	0.389	629	631	630.5
	0.39	633.5	633	632.5
	0.391	630	632.5	636
	0.392	631.5	632	634
	0.393	629	629.5	631.5
	0.394	632.5	633.5	634
	0.395	636	633.5	631
	0.396	632.5	630.5	635
	0.397	630.5	631	635.5
	0.398	634	631	633
	0.399	634.5	630.5	635
	0.4	633	630.5	633.5
	0.401	634	631	633
	0.402	630.5	631	630
	0.403	635.5	629.5	634
	0.404	632.5	630	636.5
	0.405	631.5	632	634.5
	0.406	634.5	633	636.5
	0.407	635.5	632.5	636
	0.408	636.5	631	633
	0.409	634.5	631.5	636
	0.41	635.5	633	633.5
	0.411	635	630	631.5
	0.412	634.5	629	635
	0.413	634	632.5	636
	0.414	635.5	634.5	636
	0.415	635	633	635.5
	0.416	632	637	631.5
	0.417	637	633.5	632.5
	0.418	638	634	637
	0.419	637	633	634.5
	0.42	638	635	634.5
	0.421	634	628.5	637
	0.422	637	631	633.5
	0.423	639	633	636.5
	0.424	636.5	634	635
	0.425	638	632	634
	0.426	638	636	633.5
	0.427	635	638	636
	0.428	636.5	634	633.5
	0.429	639	635.5	635.5
	0.43	636	633.5	631
	0.431	642	632	635.5
	0.432	637	636	634
	0.433	637	634.5	632
	0.434	639	635	633
	0.435	638.5	635.5	633
	0.436	639	636	636
	0.437	638.5	633.5	635
	0.438	637.5	636	636
	0.439	638	636.5	636
	0.44	639	633.5	633
	0.441	636.5	632.5	636
	0.442	637	635.5	634.5
	0.443	635	635.5	635
	0.444	638.5	635	630.5
	0.445	639	638	635.5
	0.446	639	638	636
	0.447	639	635.5	634
	0.448	639	635.5	636
	0.449	635.5	639	634.5
	0.45	637.5	636	633.5
	0.451	637	638	634.5
	0.452	633.5	639	635
	0.453	635	636	633.5
	0.454	636.5	636	634
	0.455	637.5	637	632.5
	0.456	635	636.5	634
	0.457	639	631.5	634.5
	0.458	634	635.5	631.5
	0.459	637	636	635
	0.46	635.5	637	633.5
	0.461	633	636	638
	0.462	636.5	638	633.5
	0.463	632	633.5	635.5
	0.464	635.5	639	635
	0.465	636	638	634
	0.466	634	639	635
	0.467	633.5	636.5	637.5
	0.468	634.5	639	635.5
	0.469	632.5	636.5	633.5
	0.47	631.5	638	632
	0.471	633.5	637	634.5
	0.472	633	639	636
	0.473	632.5	636	632.5
	0.474	629.5	639	633
	0.475	634	641.5	634.5
	0.476	630	637	633.5
	0.477	633	638	632.5
	0.478	635	639	633
	0.479	630.5	637	635.5
	0.48	633.5	642	636
	0.481	632	639	634.5
	0.482	632.5	642	634
	0.483	631.5	641.5	635
	0.484	633.5	639	634
	0.485	633	639	632.5
	0.486	635.5	639	629.5
	0.487	634.5	637	636
	0.488	635	637	633.5
	0.489	632	639	636.5
	0.49	634	642	634.5
	0.491	634	642	634
	0.492	630	638.5	634
	0.493	633	637.5	632.5
	0.494	631.5	639	634
	0.495	637	639	634
	0.496	636.5	639	632.5
	0.497	633	639	632.5
	0.498	634	638.5	633
	0.499	635.5	642	631.5
	0.5	632.5	639	631.5
	0.501	636	643	631.5
	0.502	634	639	631.5
	0.503	632	639	634
	0.504	631.5	642	631.5
	0.505	636	642.5	633
	0.506	633.5	637.5	632.5
	0.507	636	636	629.5
	0.508	636	641	632.5
	0.509	634.5	639	630
	0.51	634	639	630
	0.511	637.5	641.5	631
	0.512	637	639	633.5
	0.513	635.5	639	633.5
	0.514	636	637.5	635
	0.515	636	635	634
	0.516	634	637.5	629
	0.517	636	638	633.5
	0.518	636	639	632
	0.519	636.5	638.5	633.5
	0.52	636.5	639	632.5
	0.521	636.5	637	632.5
	0.522	633.5	638.5	631.5
	0.523	632.5	638	630
	0.524	634.5	639	633
	0.525	633.5	636.5	633
	0.526	635	638	629.5
	0.527	634.5	637.5	636.5
	0.528	635.5	636	629.5
	0.529	638	635.5	631
	0.53	638.5	637.5	634.5
	0.531	636	639	633.5
	0.532	634	634.5	634
	0.533	633.5	637.5	631.5
	0.534	636.5	632	630.5
	0.535	638	636	632.5
	0.536	634	634.5	635
	0.537	633	639	632
	0.538	636.5	630	633.5
	0.539	636	634.5	634.5
	0.54	636	631.5	635
	0.541	636.5	635	631
	0.542	633.5	633.5	633
	0.543	636	632.5	636
	0.544	635	631	637
	0.545	641.5	630.5	632.5
	0.546	633	635.5	635.5
	0.547	634.5	630	636
	0.548	634.5	634	635
	0.549	632.5	633	637.5
	0.55	633	632	633
	0.551	636	633	637
	0.552	631.5	632	636
	0.553	635.5	629	636.5
	0.554	633	629.5	636
	0.555	632.5	630	637
	0.556	635.5	631.5	639
	0.557	635.5	633.5	635.5
	0.558	634.5	630	631
	0.559	632.5	632	637.5
	0.56	636	629	635.5
	0.561	636	633	630.5
	0.562	633.5	632.5	634
	0.563	630.5	629	632.5
	0.564	636.5	629.5	634.5
	0.565	634	629	635.5
	0.566	636	631.5	637
	0.567	634.5	630.5	636
	0.568	630	629	632.5
	0.569	633.5	631	636
	0.57	634.5	626	632
	0.571	631	631.5	636
	0.572	635.5	627.5	629
	0.573	635.5	626.5	634
	0.574	636	624	633.5
	0.575	633	626.5	633
	0.576	631.5	628.5	631
	0.577	634.5	627.5	631.5
	0.578	633	627.5	632.5
	0.579	630.5	626	633
	0.58	633.5	624	633
	0.581	637	623	631
	0.582	632.5	627.5	631
	0.583	638.5	627.5	628.5
	0.584	634.5	628	632
	0.585	635	624	629.5
	0.586	637	623	635.5
	0.587	634.5	632.5	633.5
	0.588	634.5	625.5	629.5
	0.589	636	627.5	629
	0.59	635	626.5	629
	0.591	638	627.5	629
	0.592	635	629	630.5
	0.593	635.5	628	629.5
	0.594	631.5	627	630
	0.595	636	624	628.5
	0.596	634.5	625.5	631
	0.597	634.5	624	628
	0.598	631.5	626	630.5
	0.599	636	624	629.5
	0.6	633.5	630	629.5
	0.601	635.5	631	628
	0.602	633	631.5	629
	0.603	633.5	631	633.5
	0.604	632.5	630	630.5
	0.605	635	628	627.5
	0.606	634.5	628	632.5
	0.607	635	631	626
	0.608	632	630.5	628.5
	0.609	635	634	627
	0.61	631.5	629.5	632
	0.611	634.5	632	629
	0.612	634.5	630	629
	0.613	634	634.5	629.5
	0.614	635	636	629.5
	0.615	632.5	628	631
	0.616	631.5	635	629.5
	0.617	634.5	635.5	629.5
	0.618	634.5	631.5	629
	0.619	632.5	635	628
	0.62	636.5	632	633.5
	0.621	631.5	635	629
	0.622	632	635	629.5
	0.623	632	633	631
	0.624	632	633.5	632
	0.625	632.5	636	632.5
	0.626	630	635.5	629.5
	0.627	633	633.5	631.5
	0.628	629	636.5	629.5
	0.629	631.5	637.5	629
	0.63	632	632.5	632
	0.631	632.5	635.5	631
	0.632	629.5	636	632
	0.633	632.5	633	631.5
	0.634	637	634	633.5
	0.635	631.5	635	630.5
	0.636	635.5	635.5	632
	0.637	635.5	634	630.5
	0.638	637	633	632.5
	0.639	631.5	636	630.5
	0.64	632.5	639	632.5
	0.641	634	636.5	632
	0.642	634.5	636.5	628.5
	0.643	635.5	634	633
	0.644	634.5	632	634
	0.645	632.5	636	632
	0.646	636.5	630.5	631
	0.647	633.5	633	635
	0.648	635	629.5	633.5
	0.649	634	634.5	633.5
	0.65	630.5	632.5	631
	0.651	633	631	634
	0.652	633.5	634	632.5
	0.653	634.5	633	633
	0.654	631.5	633.5	630.5
	0.655	632	629.5	636.5
	0.656	632	629	635
	0.657	635	633.5	633.5
	0.658	632	627	634.5
	0.659	636	630.5	629
	0.66	634.5	631.5	629
	0.661	633	628.5	631
	0.662	631	628.5	629
	0.663	631.5	630	634
	0.664	628.5	626.5	629.5
	0.665	635	624	633
	0.666	631.5	626	631.5
	0.667	631.5	629	631
	0.668	631.5	627	635
	0.669	632	628.5	631.5
	0.67	630	627	629
	0.671	636	630	631.5
	0.672	636.5	629	630
	0.673	632.5	626.5	632
	0.674	633	629.5	634
	0.675	633.5	629.5	631
	0.676	630.5	629	632
	0.677	635	628	632
	0.678	632.5	628	633
	0.679	631.5	629.5	633
	0.68	634	627	630
	0.681	632	628.5	634.5
	0.682	630	625	634
	0.683	630.5	627	634
	0.684	634.5	628.5	632.5
	0.685	631	625	634.5
	0.686	634	629.5	633
	0.687	632	627	635.5
	0.688	634	627	632
	0.689	630	625.5	635.5
	0.69	633	624	637
	0.691	634	624	632.5
	0.692	633	626	635
	0.693	634	626.5	635
	0.694	633	625	635.5
	0.695	632.5	626.5	636.5
	0.696	634.5	629	634
	0.697	634	629	634
	0.698	634	628.5	637
	0.699	636	628	635.5
	0.7	634.5	624	636
	0.701	632	631	636.5
	0.702	636.5	626.5	637.5
	0.703	634	625	635
	0.704	636	629	635.5
	0.705	635.5	625.5	641.5
	0.706	635.5	630	639
	0.707	636	628	635.5
	0.708	630.5	627	635.5
	0.709	636	626.5	637.5
	0.71	633.5	627	638
	0.711	637	627.5	634.5
	0.712	637.5	627.5	636.5
	0.713	634.5	632	635.5
	0.714	635.5	629	639
	0.715	631.5	626.5	634
	0.716	634	630.5	636
	0.717	636	629.5	636
	0.718	634.5	634.5	637
	0.719	633	631.5	635.5
	0.72	636	633	638
	0.721	636	631.5	641
	0.722	634.5	628	638.5
	0.723	635.5	629	639
	0.724	635.5	633	635.5
	0.725	633	631.5	636
	0.726	631.5	633	636.5
	0.727	633.5	630.5	637
	0.728	634	634	636
	0.729	632.5	631.5	635
	0.73	634.5	630	633.5
	0.731	635	638.5	636
	0.732	636	630.5	636.5
	0.733	634	634	636
	0.734	635.5	631.5	636.5
	0.735	632	629.5	631.5
	0.736	632.5	635.5	635.5
	0.737	636	637.5	632
	0.738	633	632.5	635
	0.739	635.5	639	634
	0.74	635	635	636
	0.741	633.5	635	636
	0.742	635.5	629.5	632.5
	0.743	631.5	635	634.5
	0.744	632	638	635
	0.745	636	637	633.5
	0.746	635.5	634	631.5
	0.747	632.5	634.5	636.5
	0.748	635	635	632.5
	0.749	635	632.5	629.5
	0.75	633.5	632.5	632.5
	0.751	635	638.5	630.5
	0.752	633.5	634	636
	0.753	631.5	635.5	632.5
	0.754	630.5	636	632
	0.755	630	635.5	634.5
	0.756	632	635.5	635
	0.757	632	636.5	634.5
	0.758	633	637	632.5
	0.759	635	634.5	634.5
	0.76	632.5	636	635
	0.761	634	635	633
	0.762	637	635.5	629
	0.763	635	635.5	633
	0.764	634	634.5	629.5
	0.765	632	637.5	630.5
	0.766	631.5	636	634
	0.767	631	634	633
	0.768	633.5	636	632.5
	0.769	632.5	636	634
	0.77	633.5	635.5	632.5
	0.771	635.5	636.5	629
	0.772	636	635	633
	0.773	634.5	636	631.5
	0.774	634	639	632.5
	0.775	634.5	636	633.5
	0.776	633.5	637	632
	0.777	637	638.5	633.5
	0.778	632	636	633.5
	0.779	634	634.5	632
	0.78	635.5	635.5	631.5
	0.781	635	635	634.5
	0.782	637	637	631.5
	0.783	633	637.5	635
	0.784	633	637	631.5
	0.785	636	634	632
	0.786	633	636.5	633.5
	0.787	634	636	633.5
	0.788	634	636	634
	0.789	634	636	637.5
	0.79	633.5	636	629
	0.791	632.5	632.5	634.5
	0.792	638.5	635	631
	0.793	636.5	634.5	634
	0.794	633	635.5	633.5
	0.795	633	636.5	630.5
	0.796	635	635.5	632
	0.797	632.5	634	632
	0.798	633.5	637	630.5
	0.799	636	636	630
	0.8	634	634	630
	0.801	631.5	632.5	631.5
	0.802	633.5	633	633.5
	0.803	635	635.5	629.5
	0.804	635	637.5	629
	0.805	632.5	636	629
	0.806	630	637.5	633
	0.807	636	637	632.5
	0.808	632.5	634.5	631.5
	0.809	634.5	635.5	629.5
	0.81	632.5	635	630
	0.811	635	638	633.5
	0.812	633.5	635.5	629
	0.813	635.5	638	634.5
	0.814	635	636.5	632.5
	0.815	635	633.5	629.5
	0.816	635.5	635.5	630.5
	0.817	632.5	634.5	634
	0.818	634.5	633.5	630
	0.819	635.5	635	631
	0.82	634.5	633	629
	0.821	634	632.5	634.5
	0.822	635.5	631.5	629
	0.823	634.5	630	631
	0.824	636	630.5	628
	0.825	635.5	633.5	630
	0.826	636.5	632	629
	0.827	636.5	630	635.5
	0.828	631.5	631	632
	0.829	635	629	630.5
	0.83	634.5	629.5	629
	0.831	635.5	631.5	626.5
	0.832	633.5	631.5	631.5
	0.833	636	632	631.5
	0.834	634.5	631	628
	0.835	635	628	628.5
	0.836	632.5	629	629
	0.837	631.5	628	629.5
	0.838	636.5	625	629
	0.839	635.5	627	630.5
	0.84	638.5	630.5	633.5
	0.841	636	628.5	629
	0.842	634.5	631.5	631.5
	0.843	636.5	631.5	627
	0.844	636	630	630.5
	0.845	637.5	629	632.5
	0.846	636	625.5	631.5
	0.847	636.5	627	632.5
	0.848	637	628	632.5
	0.849	639	629	636
	0.85	639	627	632.5
	0.851	635	627.5	632
	0.852	636	634.5	629.5
	0.853	637	629	632
	0.854	636.5	626.5	634.5
	0.855	639	629.5	630
	0.856	633.5	628.5	631
	0.857	637	629.5	635
	0.858	637.5	628	634.5
	0.859	636	629	635.5
	0.86	635	628	633
	0.861	635.5	627.5	635
	0.862	636	629	628.5
	0.863	635.5	629.5	635
	0.864	637.5	629	633
	0.865	636	628	632.5
	0.866	634	628.5	638
	0.867	636	625.5	634.5
	0.868	636	630.5	631.5
	0.869	632.5	629.5	635
	0.87	634.5	630	633.5
	0.871	632.5	630	636
	0.872	635	631	632.5
	0.873	635.5	626.5	635.5
	0.874	628.5	629	633.5
	0.875	630	627	636
	0.876	634	627	633.5
	0.877	632.5	629.5	635.5
	0.878	632	633.5	636
	0.879	631.5	631	637
	0.88	629.5	630	637
	0.881	630	631	636
	0.882	629.5	632	635.5
	0.883	630	632	636
	0.884	631	628	633.5
	0.885	629.5	629.5	633
	0.886	634	629.5	634
	0.887	633	629	637
	0.888	632.5	630.5	635.5
	0.889	629	627	633
	0.89	628	628.5	635
	0.891	628.5	632.5	636
	0.892	630	629	632.5
	0.893	629	631	633
	0.894	630	630	636
	0.895	629	629.5	636.5
	0.896	625	633.5	634.5
	0.897	627	634	634.5
	0.898	630.5	630.5	633.5
	0.899	626	629.5	633
	0.9	629	629.5	634.5
	0.901	628	636	636
	0.902	629.5	633	635.5
	0.903	630.5	630.5	636
	0.904	629.5	632.5	634.5
	0.905	627.5	631	633
	0.906	628	635	632
	0.907	625.5	632	632.5
	0.908	629	632.5	631.5
	0.909	629	632.5	632.5
	0.91	629	634	633
	0.911	630.5	630.5	633.5
	0.912	633	634.5	635
	0.913	631	632.5	637.5
	0.914	631	631.5	633
	0.915	633.5	632	632.5
	0.916	629.5	631	633.5
	0.917	629	633.5	636.5
	0.918	629.5	634	635
	0.919	630.5	634.5	632.5
	0.92	629	635	634.5
	0.921	633	633.5	633.5
	0.922	634	637.5	634
	0.923	629	639	636
	0.924	634.5	636	634.5
	0.925	633.5	638	631
	0.926	632	636.5	635.5
	0.927	630	632.5	631
	0.928	633	637	630
	0.929	633	636	630.5
	0.93	630.5	637	635.5
	0.931	633.5	634.5	633
	0.932	631.5	639	631
	0.933	633.5	636	630.5
	0.934	634	636	630
	0.935	634.5	637.5	633.5
	0.936	631.5	638	633.5
	0.937	632	637	636
	0.938	631.5	637.5	634.5
	0.939	631	639	632
	0.94	632	638.5	635.5
	0.941	632	636	631
	0.942	633.5	637.5	634.5
	0.943	636	638	636
	0.944	632.5	636.5	634
	0.945	632.5	635.5	636
	0.946	635	636	632
	0.947	638	633.5	634
	0.948	632.5	636	635
	0.949	636	637.5	633.5
	0.95	633.5	637	635.5
	0.951	634.5	638.5	634
	0.952	634.5	636	635
	0.953	634.5	635.5	635
	0.954	633.5	639	638
	0.955	633	636	637
	0.956	636	636	633.5
	0.957	631	637	636
	0.958	631	637	634
	0.959	632	636.5	636
	0.96	633	636	633.5
	0.961	637	635.5	636.5
	0.962	633	637.5	636
	0.963	633	634.5	635
	0.964	635.5	634.5	633.5
	0.965	635	636	636
	0.966	631.5	636	633
	0.967	634	636.5	633.5
	0.968	633	636.5	636.5
	0.969	634.5	636	637.5
	0.97	634	636	638.5
	0.971	633	635.5	631.5
	0.972	631.5	636	629
	0.973	631.5	634.5	631.5
	0.974	634	633	635
	0.975	635	636	636.5
	0.976	634	634.5	634.5
	0.977	633	635.5	633.5
	0.978	632	637.5	634.5
	0.979	635	635.5	636.5
	0.98	637.5	632.5	632
	0.981	630	638	636
	0.982	634.5	635	639
	0.983	634	633	632.5
	0.984	635	636.5	634.5
	0.985	634.5	634	630
	0.986	636.5	634.5	631.5
	0.987	635	632	634.5
	0.988	635.5	636	633
	0.989	636	634.5	633
	0.99	636	637.5	634
	0.991	632.5	637	633.5
	0.992	632.5	631.5	631.5
	0.993	634	634.5	632.5
	0.994	635	632.5	632
	0.995	638	636	633.5
	0.996	634.5	631.5	631
	0.997	633	633.5	630.5
	0.998	633	633.5	638
	0.999	636	632.5	632
	1	636	634	631
	1.001	636	634	634
	1.002	634.5	631.5	634.5
	1.003	638	636	633.5
	1.004	633.5	636.5	631.5
	1.005	636.5	633.5	634
	1.006	634	632	629.5
	1.007	632	632.5	630
	1.008	636	632.5	631.5
	1.009	635.5	630	633
	1.01	631.5	631	631.5
	1.011	634.5	637	630.5
	1.012	634.5	635	633
	1.013	634.5	631.5	633
	1.014	636	633	633
	1.015	634.5	629.5	630.5
	1.016	630.5	632	633.5
	1.017	635.5	629.5	634
	1.018	634	629	631.5
	1.019	632.5	632.5	633.5
	1.02	636	631.5	632.5
	1.021	630.5	634	632.5
	1.022	634.5	629.5	633
	1.023	634.5	627.5	635.5
	1.024	632.5	633	633
	1.025	630.5	631.5	630
	1.026	636	631	634.5
	1.027	632.5	632	632
	1.028	632.5	629	632
	1.029	632	634.5	632
	1.03	634	629	629.5
	1.031	634	632.5	633
	1.032	632	629.5	631
	1.033	633	630.5	634
	1.034	629.5	629.5	631.5
	1.035	635.5	629	632.5
	1.036	635	629	632.5
	1.037	635.5	634	629.5
	1.038	633.5	630	630.5
	1.039	633	633	630.5
	1.04	633.5	631.5	636
	1.041	633	630	633.5
	1.042	634.5	630	635
	1.043	633.5	631	633
	1.044	632.5	632.5	633
	1.045	636.5	630	630
	1.046	637.5	633.5	632
	1.047	636	629.5	634
	1.048	636	629	634.5
	1.049	635	628.5	634.5
	1.05	631	627	629
	1.051	633.5	629	631.5
	1.052	636	630	634.5
	1.053	634.5	626.5	631.5
	1.054	635	632.5	633
	1.055	636	629.5	630.5
	1.056	633	630	634.5
	1.057	637.5	630	633
	1.058	636.5	630	632.5
	1.059	634.5	628.5	636
	1.06	637	629	636
	1.061	631.5	630.5	634.5
	1.062	636	630.5	633
	1.063	633	629	634
	1.064	637.5	629	631.5
	1.065	637	631	633
	1.066	635	629	636
	1.067	635.5	629.5	628.5
	1.068	636	629	631.5
	1.069	633.5	632.5	632.5
	1.07	635.5	632	633
	1.071	633	634.5	629.5
	1.072	633.5	632.5	634
	1.073	636	632.5	632
	1.074	633	631.5	629.5
	1.075	634	633	630.5
	1.076	632	631.5	636.5
	1.077	632.5	635.5	634.5
	1.078	634.5	633.5	634
	1.079	635.5	633	632
	1.08	634.5	635	629
	1.081	634.5	631.5	630.5
	1.082	631.5	636	634
	1.083	636.5	637	634
	1.084	633	633.5	631.5
	1.085	635.5	635.5	628
	1.086	634	635	629
	1.087	633	638	631.5
	1.088	635	635.5	630
	1.089	633.5	633.5	632
	1.09	634	637	629
	1.091	633	636	634
	1.092	631.5	632.5	629
	1.093	634.5	633	630
	1.094	635	637.5	627
	1.095	630	636.5	629
	1.096	636	634	631
	1.097	631.5	634.5	633
	1.098	630.5	634.5	628.5
	1.099	630.5	636	630
	1.1	634	639	627.5
	1.101	636	633.5	631.5
	1.102	630.5	633.5	628
	1.103	633.5	633.5	625
	1.104	632.5	633.5	626
	1.105	629.5	634.5	629
	1.106	629.5	637	628.5
	1.107	630	637.5	629.5
	1.108	629.5	633	627
	1.109	629.5	632.5	629.5
	1.11	633	636	628
	1.111	633	633.5	629.5
	1.112	629	636	628.5
	1.113	627	633.5	630.5
	1.114	631	634.5	631
	1.115	631	629.5	631.5
	1.116	629	633	628
	1.117	628	632.5	632.5
	1.118	629	635	628.5
	1.119	629	632	632.5
	1.12	630	633.5	631
	1.121	632.5	633	630
	1.122	629.5	632.5	630.5
	1.123	631.5	631.5	628.5
	1.124	629	633.5	633.5
	1.125	629	630	629
	1.126	627.5	631.5	631.5
	1.127	631	632.5	629
	1.128	631.5	633	627
	1.129	631	629	629
	1.13	630	633.5	632
	1.131	629	629.5	631
	1.132	629	627.5	629
	1.133	626	629.5	631.5
	1.134	632.5	627	629.5
	1.135	629.5	631.5	628
	1.136	627.5	629	628.5
	1.137	628	629	628.5
	1.138	628.5	627.5	632
	1.139	632	629.5	629
	1.14	634	629.5	631.5
	1.141	629	629.5	631.5
	1.142	631.5	629	631.5
	1.143	632	628	631.5
	1.144	633.5	626	627
	1.145	631.5	627.5	631.5
	1.146	632.5	626	629
	1.147	633	627.5	631.5
	1.148	629.5	626.5	632
	1.149	630.5	626.5	630.5
	1.15	631.5	631	633.5
	1.151	631.5	625.5	631.5
	1.152	633.5	630.5	631
	1.153	632.5	626	628
	1.154	633	626.5	631.5
	1.155	632.5	627.5	629
	1.156	632	627.5	631
	1.157	631.5	629.5	633
	1.158	630.5	627.5	632.5
	1.159	633	626	631
	1.16	630	626.5	631.5
	1.161	636	628	634
	1.162	630.5	633	633.5
	1.163	628.5	631	633.5
	1.164	629	627	632
	1.165	632.5	630	634
	1.166	635.5	629.5	631
	1.167	631	632	634
	1.168	630.5	631	635.5
	1.169	632	631	635
	1.17	633.5	629	635
	1.171	629	631.5	635.5
	1.172	633	629.5	633
	1.173	630.5	636	636
	1.174	629	632.5	636
	1.175	629	634.5	639
	1.176	630.5	633.5	636
	1.177	629	631.5	634.5
	1.178	630	637	638
	1.179	633	633	636
	1.18	631	634	637
	1.181	632	636	636
	1.182	631.5	636.5	636.5
	1.183	632.5	639	636
	1.184	629	636	636.5
	1.185	635	636	639
	1.186	632.5	636.5	634
	1.187	629.5	631.5	635.5
	1.188	632	637.5	636
	1.189	631.5	634	635
	1.19	632	637	633.5
	1.191	632.5	636.5	634
	1.192	635	637.5	634
	1.193	633	636.5	632.5
	1.194	631	636	635.5
	1.195	631.5	637	636.5
	1.196	634	637.5	635
	1.197	636	637	635.5
	1.198	630	636	637
	1.199	634.5	636.5	636
	1.2	636.5	636.5	638
	1.201	631.5	638	635.5
	1.202	635.5	637.5	635
	1.203	638	638.5	636
	1.204	637	635	635.5
	1.205	638	636	637.5
	1.206	641	636	636
	1.207	639	636	637.5
	1.208	638	635	636.5
	1.209	637.5	636.5	638
	1.21	637	635	633.5
	1.211	638.5	634.5	637
	1.212	638	636	634.5
	1.213	641.5	632.5	636
	1.214	639	637.5	634.5
	1.215	639	636	635
	1.216	639	632.5	635.5
	1.217	639	631.5	634.5
	1.218	638	632	632
	1.219	636	633	635.5
	1.22	636	636.5	636
	1.221	639	634.5	635
	1.222	636	636	635.5
	1.223	639	631.5	633
	1.224	643	632.5	634.5
	1.225	642	634	633
	1.226	638.5	634.5	635
	1.227	639	631	635
	1.228	638.5	630	633
	1.229	642	634	635.5
	1.23	639	634	629
	1.231	642.5	634.5	635
	1.232	643	632.5	631.5
	1.233	637.5	631	629.5
	1.234	642.5	634	631.5
	1.235	639	632	628.5
	1.236	636	629.5	635.5
	1.237	643	629	630
	1.238	642	630.5	631.5
	1.239	645.5	632.5	634.5
	1.24	641	635	631.5
	1.241	639	631.5	634
	1.242	639	635	632.5
	1.243	644	635.5	636
	1.244	639	633.5	635
	1.245	639	635	634.5
	1.246	638.5	634	633
	1.247	645.5	631.5	631
	1.248	642	634.5	629
	1.249	643	634.5	633
	1.25	639	637	633
	1.251	643	634.5	634.5
	1.252	641.5	634	631
	1.253	643	637.5	632.5
	1.254	637.5	636	631.5
	1.255	639	639	630.5
	1.256	638.5	633	631.5
	1.257	638	636.5	632.5
	1.258	639	636	635.5
	1.259	637.5	637.5	632.5
	1.26	639	636	632.5
	1.261	639	639	632.5
	1.262	639	639	629
	1.263	639	642	630
	1.264	636	642.5	634
	1.265	637.5	638.5	632
	1.266	637.5	636	633.5
	1.267	641.5	639	632.5
	1.268	637	638	637
	1.269	636.5	642	631.5
	1.27	638	642	636.5
	1.271	635	642.5	634.5
	1.272	636.5	643	635
	1.273	632.5	639	634
	1.274	635	641	634
	1.275	632	641.5	634
	1.276	634	639	635.5
	1.277	639	643.5	637.5
	1.278	633.5	643	636
	1.279	632.5	643	635
	1.28	631	644	634
	1.281	630.5	644.5	637
	1.282	634.5	646	636.5
	1.283	632.5	643.5	636.5
	1.284	629.5	644.5	638.5
	1.285	632.5	642	635.5
	1.286	634	645	636
	1.287	633.5	642	638.5
	1.288	631.5	641.5	636
	1.289	633.5	646.5	638
	1.29	628	646.5	639
	1.291	631	643.5	636
	1.292	630	640.5	639
	1.293	629.5	647	635.5
	1.294	629	648.5	638.5
	1.295	627.5	642.5	640.5
	1.296	629.5	643	635.5
	1.297	630	639	634.5
	1.298	627.5	643	636.5
	1.299	629	642	641
	1.3	629	643.5	637.5
	1.301	628	642	639
	1.302	632.5	645	639
	1.303	628	645.5	636
	1.304	624	643.5	637.5
	1.305	630.5	639	639
	1.306	631.5	643.5	638
	1.307	631.5	643	639
	1.308	631	645	638
	1.309	632.5	642.5	642
	1.31	629	642	636
	1.311	626	643.5	640
	1.312	632	639	639
	1.313	631	639	640
	1.314	631	641.5	638
	1.315	629	643.5	642.5
	1.316	632.5	642	639
	1.317	629.5	641.5	638.5
	1.318	630	642	638
	1.319	634	639	638.5
	1.32	633.5	639	639
	1.321	631	637.5	639
	1.322	633.5	642	639
	1.323	636	640.5	641
	1.324	636	635.5	642
	1.325	636.5	639	637.5
	1.326	635	639	636.5
	1.327	639	638.5	638.5
	1.328	638	636.5	639
	1.329	639	637	641.5
	1.33	638.5	635.5	639
	1.331	638	635.5	638.5
	1.332	641	635.5	639
	1.333	638.5	633.5	641
	1.334	639	635.5	638
	1.335	641.5	636	636
	1.336	643	636	636
	1.337	641.5	635	639
	1.338	641	636	637.5
	1.339	643.5	636	638
	1.34	645	632	638
	1.341	648.5	634	638
	1.342	648	631	636.5
	1.343	647	630	638.5
	1.344	648.5	632.5	637
	1.345	649.5	631.5	638
	1.346	649	632	636
	1.347	646	629	636.5
	1.348	649.5	631	637
	1.349	649.5	629	633.5
	1.35	648	630	636
	1.351	651	629.5	636
	1.352	648.5	630.5	634.5
	1.353	646.5	629	634.5
	1.354	647.5	629.5	636
	1.355	648.5	632	634
	1.356	649.5	630.5	634
	1.357	648	629.5	631.5
	1.358	649	629	634.5
	1.359	649	632.5	633.5
	1.36	648.5	630	634
	1.361	649.5	629	634.5
	1.362	647.5	627.5	634.5
	1.363	648	630.5	630.5
	1.364	647	627	634
	1.365	647.5	629	631.5
	1.366	648.5	627.5	636
	1.367	647	625.5	634
	1.368	647	626	632.5
	1.369	644.5	628	634.5
	1.37	645.5	629	633.5
	1.371	646.5	632.5	634
	1.372	646	625.5	635
	1.373	647	628.5	632.5
	1.374	644.5	628	630.5
	1.375	644.5	628.5	633.5
	1.376	644	628	632
	1.377	643.5	628.5	632
	1.378	644.5	629.5	636
	1.379	639	628	633
	1.38	643.5	628.5	632.5
	1.381	641	626	635.5
	1.382	638.5	625.5	635
	1.383	639	626	635.5
	1.384	642.5	626.5	630.5
	1.385	637	626.5	636.5
	1.386	641	626.5	636
	1.387	639	624	636
	1.388	637	628	636
	1.389	639	627	631.5
	1.39	636.5	628	637
	1.391	637	626.5	635.5
	1.392	634	628.5	638.5
	1.393	636	626	639
	1.394	634	626	639
	1.395	634.5	625.5	639
	1.396	635.5	628.5	639
	1.397	632	628	641.5
	1.398	633.5	626	642
	1.399	634	624	642.5
	1.4	631	623.5	643.5
	1.401	627.5	627	639
	1.402	629	626	642.5
	1.403	629.5	626.5	645.5
	1.404	628	625.5	645.5
	1.405	629	627	644
	1.406	625.5	624	649
	1.407	629	629	644.5
	1.408	628.5	626	649.5
	1.409	626	622.5	648.5
	1.41	627.5	625	647
	1.411	626	625	648
	1.412	626	629	650
	1.413	624	625.5	652
	1.414	626	626	649.5
	1.415	622	623	650
	1.416	622	625.5	655.5
	1.417	623.5	624	656
	1.418	624	621	656
	1.419	622.5	626	656.5
	1.42	626	625.5	657
	1.421	619	625	659
	1.422	622.5	626	659
	1.423	621.5	623	658.5
	1.424	622	624	657.5
	1.425	620	623	664
	1.426	624	624	664.5
	1.427	623.5	625	661.5
	1.428	623	624	659
	1.429	621	624	663.5
	1.43	624	629	660
	1.431	621.5	626	662
	1.432	619	623	662
	1.433	624	625.5	663
	1.434	623.5	626.5	661
	1.435	621.5	626.5	663
	1.436	626.5	624	661.5
	1.437	623.5	623.5	658
	1.438	621	623	657.5
	1.439	624	626	661.5
	1.44	625.5	626.5	656.5
	1.441	624	624	657
	1.442	623.5	623	657.5
	1.443	624	623	656.5
	1.444	626	627.5	650
	1.445	627	627	651
	1.446	626	623.5	648.5
	1.447	624	625.5	648.5
	1.448	627	626	647
	1.449	629	627	645.5
	1.45	624	624	643
	1.451	629.5	629.5	644
	1.452	627.5	622.5	643
	1.453	628	624	642
	1.454	629	629	638.5
	1.455	632.5	628	638
	1.456	629	627	635
	1.457	629	626.5	636
	1.458	628.5	628	633.5
	1.459	630.5	629	633.5
	1.46	634.5	630	626.5
	1.461	632.5	629	628
	1.462	634.5	631.5	628
	1.463	633.5	633	628
	1.464	634.5	632.5	629
	1.465	636	630	624
	1.466	637.5	629	623
	1.467	637.5	634.5	624
	1.468	639	630.5	623.5
	1.469	637.5	631.5	619
	1.47	638	632	622.5
	1.471	638	629.5	621.5
	1.472	636	630.5	620.5
	1.473	642	630.5	619
	1.474	639	632	619.5
	1.475	641.5	633	619
	1.476	642	637	620
	1.477	639	634.5	617
	1.478	639	633.5	618.5
	1.479	637.5	632.5	617
	1.48	639	633.5	620
	1.481	642	634	617.5
	1.482	639	633	619.5
	1.483	639	636	616.5
	1.484	638	636	619
	1.485	641	635.5	615.5
	1.486	643	637.5	616
	1.487	639	638	616.5
	1.488	635	637.5	617.5
	1.489	638	635.5	616.5
	1.49	639	636	612.5
	1.491	636	639	615.5
	1.492	639	637.5	612
	1.493	636	637	608
	1.494	639	638	613.5
	1.495	636.5	639	608
	1.496	639	636	608.5
	1.497	634.5	639	607
	1.498	633	636	602.5
	1.499	632.5	638	600.5
	1.5	630	638.5	598
	1.501	628	637.5	600.5
	1.502	629	639	590.5
	1.503	630	639	589
	1.504	625.5	642	587.5
	1.505	627	641	583
	1.506	628	636	577
	1.507	622	637.5	574
	1.508	625.5	641	568
	1.509	621	639	566.5
	1.51	617.5	637	561
	1.511	618	642	558.5
	1.512	618.5	638	549.5
	1.513	616	639	547
	1.514	619	639	537.5
	1.515	614	642	536
	1.516	616.5	637	533.5
	1.517	611.5	643	525
	1.518	612	642	519.5
	1.519	608.5	643.5	514.5
	1.52	607.5	641	512.5
	1.521	609	639	504.5
	1.522	606.5	639	499
	1.523	608.5	639	490
	1.524	606	639	489.5
	1.525	604.5	638	478.5
	1.526	605.5	642.5	475
	1.527	605.5	642.5	466
	1.528	606.5	639	460
	1.529	602.5	642	455.5
	1.53	605.5	643.5	448.5
	1.531	604	639	441
	1.532	605.5	639	432.5
	1.533	604	642	429
	1.534	604	642.5	423.5
	1.535	606	641.5	419
	1.536	601.5	641.5	408
	1.537	601.5	639	400.5
	1.538	601	643	395
	1.539	603.5	639	388
	1.54	602.5	635.5	378
	1.541	601	639	370.5
	1.542	601.5	638	365
	1.543	598.5	638	358
	1.544	598	637	350.5
	1.545	596.5	635	342.5
	1.546	595.5	635	336
	1.547	595.5	633.5	327.5
	1.548	591.5	636	324
	1.549	594.5	634.5	316.5
	1.55	590.5	628	308
	1.551	589.5	630	300.5
	1.552	586	628	294
	1.553	586.5	628	289.5
	1.554	579.5	627	281
	1.555	579.5	624.5	275.5
	1.556	579.5	626.5	272
	1.557	574.5	627	264
	1.558	571	625	258.5
	1.559	567	624	258
	1.56	566	624	254
	1.561	562.5	618	241.5
	1.562	558	620	240
	1.563	552	618.5	233
	1.564	547.5	615.5	231.5
	1.565	547	616	232
	1.566	539	615	225.5
	1.567	533.5	615.5	224
	1.568	531.5	611	217.5
	1.569	523.5	609	221
	1.57	519.5	613	219
	1.571	515.5	608.5	213
	1.572	510.5	607.5	212
	1.573	505	610	209.5
	1.574	498	611	204.5
	1.575	490	609	199
	1.576	484.5	609	203
	1.577	482	604.5	196.5
	1.578	471.5	607.5	194.5
	1.579	464	609	191
	1.58	458.5	605.5	190
	1.581	453	603	187.5
	1.582	445	603	183.5
	1.583	437.5	602.5	181
	1.584	431	605	178.5
	1.585	422	602.5	177
	1.586	417	597	174
	1.587	407	601.5	171
	1.588	403	597	169
	1.589	392.5	598	165
	1.59	385	596	164.5
	1.591	377.5	594.5	157
	1.592	370	594	159
	1.593	367	592	159
	1.594	355	591.5	156
	1.595	347	588	149.5
	1.596	342	587.5	148.5
	1.597	333.5	581.5	146
	1.598	325.5	579.5	144
	1.599	316	584	143.5
	1.6	313.5	579.5	140.5
	1.601	303.5	577	135.5
	1.602	296	576.5	137
	1.603	288.5	579.5	132
	1.604	279	572	129.5
	1.605	274.5	574.5	129.5
	1.606	269	569	126.5
	1.607	260.5	567.5	123
	1.608	256	567.5	120
	1.609	253	567	120.5
	1.61	241.5	564.5	120
	1.611	234.5	562	117
	1.612	231.5	562	114
	1.613	225	561.5	113.5
	1.614	219	561.5	109
	1.615	210.5	560	110.5
	1.616	208.5	557	105
	1.617	202.5	558	105.5
	1.618	196.5	554	104
	1.619	191	554.5	102.5
	1.62	187.5	551.5	98.5
	1.621	182.5	546.5	101
	1.622	177.5	549.5	99
	1.623	172	545	94
	1.624	169.5	542	97
	1.625	161.5	545	91
	1.626	161	540.5	92.5
	1.627	156.5	537	95
	1.628	154.5	533.5	88
	1.629	153.5	534	89
	1.63	150.5	530	85.5
	1.631	147.5	527.5	87.5
	1.632	145.5	525.5	85
	1.633	141.5	524.5	83.5
	1.634	143.5	518.5	82
	1.635	136	515.5	83.5
	1.636	134	512	81.5
	1.637	138	506	79
	1.638	129.5	502	76.5
	1.639	132	499	78
	1.64	129	496	75.5
	1.641	132.5	487.5	75
	1.642	127	484.5	72.5
	1.643	123	479	73
	1.644	123.5	473	72
	1.645	121.5	467	73
	1.646	120	461.5	73.5
	1.647	121.5	452.5	71
	1.648	118	446	69.5
	1.649	118.5	442.5	69.5
	1.65	112.5	432	71
	1.651	110.5	425	69.5
	1.652	113	417	71
	1.653	109	410.5	69
	1.654	109	400.5	65.5
	1.655	108	394	68
	1.656	105	381	66.5
	1.657	105.5	378.5	66
	1.658	104.5	367	68
	1.659	104.5	357	65
	1.66	100	349	66
	1.661	99.5	340	68.5
	1.662	102.5	332.5	68
	1.663	102.5	324.5	68
	1.664	97	314.5	68
	1.665	96.5	306	68
	1.666	94	298.5	71
	1.667	93.5	291.5	70.5
	1.668	92.5	280	69.5
	1.669	94	273.5	73
	1.67	90.5	265.5	73
	1.671	89	257	74.5
	1.672	86	248.5	73.5
	1.673	90	242.5	73
	1.674	84.5	236.5	81.5
	1.675	86.5	225.5	81.5
	1.676	87.5	219.5	81
	1.677	82.5	215	81.5
	1.678	85.5	208.5	84
	1.679	84.5	205	87
	1.68	80.5	195.5	90
	1.681	84	190	91.5
	1.682	80.5	187.5	94.5
	1.683	80.5	181.5	96.5
	1.684	78	182	99
	1.685	80	178	103.5
	1.686	78.5	175.5	108.5
	1.687	79	175.5	107.5
	1.688	80	169	116
	1.689	79	164.5	116.5
	1.69	78	164	123.5
	1.691	76	163.5	122.5
	1.692	76	161	129.5
	1.693	78.5	162	133
	1.694	76	153.5	139
	1.695	77	156.5	141.5
	1.696	76	154	152
	1.697	74.5	151.5	155
	1.698	80	152.5	163.5
	1.699	75	149.5	176
	1.7	76	143.5	186.5
	1.701	73	144.5	196.5
	1.702	76.5	139.5	216
	1.703	76	141	232.5
	1.704	76.5	142	253.5
	1.705	76	137	273.5
	1.706	82	131	292
	1.707	78.5	136.5	313.5
	1.708	78.5	129.5	332
	1.709	78	129.5	354
	1.71	79.5	129.5	372
	1.711	78.5	124	389.5
	1.712	80	122.5	406
	1.713	84.5	123	421.5
	1.714	82	118	431
	1.715	85.5	119	441.5
	1.716	87.5	116	447.5
	1.717	84.5	115.5	458
	1.718	85.5	110.5	457.5
	1.719	88.5	109	465
	1.72	93.5	111	474
	1.721	92	109.5	481.5
	1.722	92	103	484.5
	1.723	95	109	489.5
	1.724	99.5	103.5	492.5
	1.725	100	102.5	499
	1.726	102.5	103	506
	1.727	105	101	514
	1.728	110	98.5	521.5
	1.729	110	97	533.5
	1.73	113	95.5	537
	1.731	119.5	95.5	542
	1.732	125.5	94	549.5
	1.733	124.5	90.5	548
	1.734	133.5	88.5	549
	1.735	143.5	89	550.5
	1.736	144	91	548
	1.737	156	91.5	549
	1.738	165	88	547
	1.739	172.5	87	546
	1.74	185	84.5	543
	1.741	198	83	545.5
	1.742	212.5	83	541.5
	1.743	229.5	86	544.5
	1.744	242.5	83	547.5
	1.745	261	82	553.5
	1.746	276	86	554
	1.747	293.5	83	560.5
	1.748	305.5	81	558.5
	1.749	324	81	571.5
	1.75	333	81	573.5
	1.751	342	82	578
	1.752	351.5	84.5	587
	1.753	355.5	82.5	594.5
	1.754	369	82	600.5
	1.755	375	84	609
	1.756	378.5	83.5	618.5
	1.757	385.5	82	626.5
	1.758	389.5	83.5	636.5
	1.759	390.5	82	648
	1.76	396.5	81	661
	1.761	405.5	82	672.5
	1.762	404.5	81	682
	1.763	413	82.5	698.5
	1.764	418	82.5	710
	1.765	425	82	726
	1.766	430.5	83	739
	1.767	439.5	84	752
	1.768	446.5	80	767.5
	1.769	452.5	81.5	784
	1.77	458	82.5	796.5
	1.771	462	81.5	812
	1.772	465	83	818
	1.773	465	82	834.5
	1.774	469.5	82	848
	1.775	474.5	84.5	857.5
	1.776	470.5	86	873
	1.777	472	85.5	883
	1.778	470	83.5	897.5
	1.779	475	87.5	905.5
	1.78	475	88	916
	1.781	482.5	88.5	930
	1.782	483.5	87.5	937
	1.783	488	89.5	949
	1.784	492.5	88	958.5
	1.785	499.5	88.5	972.5
	1.786	505	92.5	978
	1.787	511	94	986
	1.788	518.5	93.5	997
	1.789	526	92.5	1004
	1.79	534	95	1010
	1.791	543.5	96.5	1016.5
	1.792	553	101	1023.5
	1.793	562.5	102	1028
	1.794	569	102.5	1035.5
	1.795	578.5	108.5	1041.5
	1.796	590	108	1044
	1.797	601.5	109	1051
	1.798	612.5	114.5	1054.5
	1.799	622	117.5	1056.5
	1.8	636	123	1061.5
	1.801	643.5	129	1069
	1.802	650	134	1071
	1.803	666	142	1076.5
	1.804	677	145.5	1081.5
	1.805	687.5	155	1086
	1.806	701.5	159	1091
	1.807	712	167.5	1099.5
	1.808	719.5	178.5	1100.5
	1.809	732.5	184.5	1110
	1.81	745.5	192.5	1113.5
	1.811	754	203.5	1116
	1.812	758.5	210.5	1124
	1.813	771	220	1126
	1.814	784	227.5	1135.5
	1.815	786.5	238.5	1134
	1.816	797.5	245.5	1139.5
	1.817	807.5	259.5	1141.5
	1.818	816	272.5	1142
	1.819	830.5	279	1145
	1.82	833	294	1144
	1.821	845.5	305.5	1144.5
	1.822	855	317.5	1150
	1.823	862.5	326.5	1153.5
	1.824	870	342	1153.5
	1.825	875.5	354	1155.5
	1.826	887.5	369.5	1156.5
	1.827	895.5	379.5	1160
	1.828	904.5	391	1161
	1.829	910	399.5	1166.5
	1.83	920.5	410	1174.5
	1.831	922.5	414.5	1176
	1.832	931.5	422.5	1176
	1.833	937	425.5	1188
	1.834	943.5	428.5	1190
	1.835	950	429.5	1196.5
	1.836	952	431	1200.5
	1.837	960.5	431	1211
	1.838	961.5	433	1219.5
	1.839	966	429.5	1224.5
	1.84	973	428.5	1232
	1.841	977	431	1239.5
	1.842	982	430.5	1245.5
	1.843	982	430	1255
	1.844	988.5	428	1265
	1.845	991.5	434.5	1272
	1.846	991.5	434.5	1280
	1.847	1002.5	439.5	1292.5
	1.848	1002.5	444.5	1295
	1.849	1006	445	1310
	1.85	1008	454	1317
	1.851	1012	453	1323
	1.852	1020	459.5	1335.5
	1.853	1021.5	464	1340
	1.854	1025	471	1350
	1.855	1029	474	1350.5
	1.856	1031.5	479.5	1361.5
	1.857	1033	481.5	1369.5
	1.858	1034	490	1369.5
	1.859	1038	496	1378.5
	1.86	1039.5	499	1380.5
	1.861	1043.5	506	1388.5
	1.862	1046.5	511.5	1389
	1.863	1046	519.5	1395
	1.864	1044.5	529	1398.5
	1.865	1050	532.5	1403
	1.866	1052	543	1407.5
	1.867	1054	551	1410
	1.868	1056.5	560	1414
	1.869	1056.5	569	1414.5
	1.87	1061	577.5	1420
	1.871	1065	588.5	1422.5
	1.872	1067	595.5	1424.5
	1.873	1069.5	603.5	1431.5
	1.874	1070	613	1429.5
	1.875	1075	623	1434.5
	1.876	1080	632.5	1435
	1.877	1085	642	1443
	1.878	1084.5	651	1444
	1.879	1093.5	656	1444
	1.88	1098	668	1455
	1.881	1103.5	677	1455
	1.882	1106	687	1459
	1.883	1113	698.5	1466.5
	1.884	1116	704	1464
	1.885	1125	718	1469.5
	1.886	1128.5	723.5	1470.5
	1.887	1135.5	733	1474
	1.888	1138.5	743	1474
	1.889	1147.5	752	1474
	1.89	1153.5	767.5	1479
	1.891	1160	772.5	1484
	1.892	1167.5	779.5	1483.5
	1.893	1176	798	1483.5
	1.894	1180.5	805.5	1487.5
	1.895	1186	811	1488
	1.896	1188	821.5	1489
	1.897	1199	836	1494
	1.898	1203	845.5	1493.5
	1.899	1213	857	1499
	1.9	1218.5	872	1497.5
	1.901	1227.5	877.5	1502.5
	1.902	1231	892.5	1504
	1.903	1239	902.5	1510
	1.904	1243.5	912	1511.5
	1.905	1245.5	928	1512.5
	1.906	1250.5	934	1518.5
	1.907	1258.5	946.5	1517
	1.908	1265	956	1518.5
	1.909	1265	967	1521.5
	1.91	1270.5	977	1523.5
	1.911	1276.5	988	1527
	1.912	1278.5	997	1530.5
	1.913	1282.5	1003.5	1531.5
	1.914	1289.5	1012	1533.5
	1.915	1295	1024	1533.5
	1.916	1295	1032	1533.5
	1.917	1305.5	1040	1540
	1.918	1310	1051	1540.5
	1.919	1315.5	1056.5	1542
	1.92	1324	1066	1545
	1.921	1325	1071.5	1542.5
	1.922	1336	1078.5	1547.5
	1.923	1340	1086.5	1547
	1.924	1350.5	1094.5	1548.5
	1.925	1354.5	1099.5	1548.5
	1.926	1368	1106	1548.5
	1.927	1374	1110	1551.5
	1.928	1380.5	1116	1553.5
	1.929	1384.5	1121.5	1556
	1.93	1398	1128.5	1556
	1.931	1399.5	1136.5	1556
	1.932	1409	1138.5	1556
	1.933	1414.5	1142	1557
	1.934	1421	1146	1559.5
	1.935	1427	1149	1557.5
	1.936	1433	1156.5	1558
	1.937	1440.5	1158	1554
	1.938	1444	1164	1556.5
	1.939	1453	1166.5	1551.5
	1.94	1456.5	1171.5	1553.5
	1.941	1459	1173.5	1548.5
	1.942	1464.5	1176	1546
	1.943	1471	1181	1547.5
	1.944	1474	1181	1546
	1.945	1479	1186.5	1545.5
	1.946	1482.5	1190.5	1545.5
	1.947	1480	1193.5	1539
	1.948	1489	1198	1539.5
	1.949	1492.5	1199	1533.5
	1.95	1495.5	1199.5	1533.5
	1.951	1504	1205.5	1533.5
	1.952	1504	1212.5	1533.5
	1.953	1512	1216	1533.5
	1.954	1509.5	1220.5	1533.5
	1.955	1517	1227	1533.5
	1.956	1518.5	1230	1533.5
	1.957	1518.5	1235	1539
	1.958	1522	1244	1533.5
	1.959	1525	1246.5	1533.5
	1.96	1531.5	1254.5	1540.5
	1.961	1533.5	1259.5	1533.5
	1.962	1539	1265	1533.5
	1.963	1539.5	1270.5	1533
	1.964	1543.5	1282.5	1533.5
	1.965	1547	1289.5	1533.5
	1.966	1548.5	1302	1530.5
	1.967	1555	1305.5	1532
	1.968	1553.5	1309	1530
	1.969	1556.5	1318.5	1529.5
	1.97	1557.5	1325	1526.5
	1.971	1558.5	1330.5	1525
	1.972	1561.5	1340	1525
	1.973	1560	1347.5	1518.5
	1.974	1563.5	1349.5	1521
	1.975	1563.5	1354.5	1518.5
	1.976	1563.5	1363	1518
	1.977	1563.5	1368	1517.5
	1.978	1563.5	1375	1511.5
	1.979	1563.5	1379	1511
	1.98	1563.5	1384.5	1511.5
	1.981	1563.5	1392	1505.5
	1.982	1559.5	1395.5	1507.5
	1.983	1563.5	1399.5	1505.5
	1.984	1559	1407	1507.5
	1.985	1560.5	1411	1501
	1.986	1559.5	1414.5	1498.5
	1.987	1561	1423	1500
	1.988	1557	1419.5	1498
	1.989	1558	1429.5	1496
	1.99	1553	1436	1494
	1.991	1555	1438.5	1489
	1.992	1553.5	1441.5	1489
	1.993	1551.5	1444	1489
[truncated: 6,006 more rows]

## Sheet: E
DataTypeVer2.0	Time	Fz	Fz	Fz
NumberOfData		15000	15000	15000
PreTriggerData		0	0	0
SamplingTime[ms]		1	1	1
DataLabel		AI1:CMJ	AI2:CMJ	AI3:CMJ
DataUnit	sec	N	N	N
	0	679	688	685
	0.001	683.5	685	685
	0.002	681.5	688	685.5
	0.003	681	686	683.5
	0.004	684	686	682.5
	0.005	685	681	684
	0.006	681.5	687.5	687.5
	0.007	681.5	687	682
	0.008	683	684	684.5
	0.009	682	684.5	683.5
	0.01	681	684	689
	0.011	683.5	683.5	684.5
	0.012	682.5	686.5	685
	0.013	682.5	685	682
	0.014	680	681.5	684
	0.015	685	683	687
	0.016	681	684	685.5
	0.017	681.5	684.5	682
	0.018	683.5	685	686
	0.019	683	682.5	684.5
	0.02	684.5	683	680.5
	0.021	686	681.5	680.5
	0.022	683	684.5	683
	0.023	683	683.5	685
	0.024	684	684.5	683.5
	0.025	685	683	684.5
	0.026	683.5	686	683.5
	0.027	686	685.5	690.5
	0.028	685.5	683.5	684
	0.029	688	682.5	683
	0.03	681.5	687.5	685
	0.031	684.5	681	685
	0.032	686	684	685
	0.033	687.5	681.5	685
	0.034	684	685	682
	0.035	685.5	684	685.5
	0.036	686.5	679.5	685.5
	0.037	685.5	681.5	686
	0.038	689.5	683	687
	0.039	686	684	685
	0.04	687.5	686	685.5
	0.041	687.5	684	684
	0.042	684	684	684.5
	0.043	687.5	682.5	685
	0.044	689.5	684	684
	0.045	686	685	684.5
	0.046	684.5	687.5	685
	0.047	684	683.5	683.5
	0.048	687.5	684	681.5
	0.049	687	685	683
	0.05	684	685	686.5
	0.051	686.5	683.5	684
	0.052	686	683.5	682
	0.053	688.5	682.5	684.5
	0.054	685.5	685	684
	0.055	685.5	685	684
	0.056	685.5	681	683
	0.057	690	686	682.5
	0.058	688.5	683	684.5
	0.059	688	683	684
	0.06	687.5	682	681
	0.061	690	686.5	686
	0.062	688	685.5	684.5
	0.063	689	682.5	683.5
	0.064	690.5	684	685
	0.065	688.5	686	684
	0.066	688.5	686	685
	0.067	690.5	687.5	682.5
	0.068	688.5	683.5	684
	0.069	688	683	684
	0.07	688.5	684	688
	0.071	684.5	683.5	684
	0.072	688.5	688	685
	0.073	686	684	682.5
	0.074	689.5	687.5	684
	0.075	688	686	684
	0.076	687	686.5	687.5
	0.077	691.5	686	682
	0.078	689	688	686.5
	0.079	687	687	686.5
	0.08	688.5	685	684
	0.081	688	687	687.5
	0.082	687	686.5	689
	0.083	686.5	684	687
	0.084	687	685	689
	0.085	690.5	687.5	684
	0.086	687	683	689
	0.087	693	686.5	688
	0.088	688.5	684.5	685.5
	0.089	692	684	685.5
	0.09	686	682	688
	0.091	690.5	685	690
	0.092	689.5	687.5	688
	0.093	688.5	684	687
	0.094	685	686	690.5
	0.095	686	686.5	687.5
	0.096	688.5	688	689.5
	0.097	687.5	684	689.5
	0.098	688	686	688.5
	0.099	688	685	688
	0.1	689	684.5	688.5
	0.101	687.5	685.5	686
	0.102	688.5	686	690.5
	0.103	690.5	684	689
	0.104	690.5	685	690.5
	0.105	688.5	687	689.5
	0.106	689.5	684	688.5
	0.107	689	685	691.5
	0.108	688.5	685	688
	0.109	687	684.5	690.5
	0.11	688	684.5	691.5
	0.111	689.5	684.5	690.5
	0.112	687	687	693
	0.113	688.5	684	690.5
	0.114	685	685	687.5
	0.115	689.5	684	690.5
	0.116	688	684	690.5
	0.117	686.5	685	690.5
	0.118	688.5	681	688
	0.119	686	683	690.5
	0.12	687	686.5	687.5
	0.121	685.5	681	689
	0.122	685	685.5	690
	0.123	683.5	687	691.5
	0.124	685	687.5	690
	0.125	686.5	686	687.5
	0.126	687.5	684.5	690.5
	0.127	684	686	689.5
	0.128	687	689.5	689.5
	0.129	686	683	690.5
	0.13	688.5	682.5	687
	0.131	686	685	689
	0.132	687.5	684.5	690
	0.133	685.5	686	689
	0.134	686.5	687	690.5
	0.135	685	685.5	686.5
	0.136	685	684.5	687
	0.137	686.5	683.5	690.5
	0.138	686	688.5	688
	0.139	686	685	690
	0.14	686	684	689.5
	0.141	686	683.5	686.5
	0.142	687.5	684	690.5
	0.143	684	687	684.5
	0.144	690	689	684
	0.145	689	686	687
	0.146	688.5	688.5	686
	0.147	688.5	687	686
	0.148	690.5	685	684.5
	0.149	686.5	688.5	686.5
	0.15	687.5	690.5	684.5
	0.151	687	687.5	685.5
	0.152	685.5	687	686.5
	0.153	686	688	687.5
	0.154	686	687	687.5
	0.155	685	688	686
	0.156	688.5	687	686
	0.157	685.5	686.5	687.5
	0.158	686	688	688
	0.159	687.5	687	684
	0.16	687.5	689.5	684
	0.161	684	689	684.5
	0.162	684.5	684.5	684.5
	0.163	686	690.5	684
	0.164	685.5	686	684
	0.165	685	686	685
	0.166	685.5	688	685.5
	0.167	688.5	690.5	685
	0.168	684	687	686.5
	0.169	686	687	686
	0.17	686	685.5	686
	0.171	687.5	690.5	684
	0.172	685	688	684
	0.173	683.5	687	688.5
	0.174	685	688.5	686
	0.175	684	687	685
	0.176	689	689.5	686.5
	0.177	686.5	685	685.5
	0.178	686	690	685.5
	0.179	686.5	688.5	687
	0.18	686	687.5	686.5
	0.181	684	690	690
	0.182	688	686	690
	0.183	687	685	687
	0.184	686.5	687.5	689
	0.185	684.5	689.5	686.5
	0.186	686	689	689.5
	0.187	684	687.5	685
	0.188	684.5	690.5	689.5
	0.189	684.5	688	689.5
	0.19	684	690.5	685
	0.191	683	690	687
	0.192	684	690.5	690
	0.193	683	686.5	689
	0.194	685.5	688	689.5
	0.195	689	689.5	687.5
	0.196	686.5	687.5	684.5
	0.197	683.5	690	685
	0.198	685	687	686
	0.199	683	688.5	688
	0.2	686	689	686.5
	0.201	685	690.5	688.5
	0.202	684	689.5	688.5
	0.203	684	687.5	689
	0.204	685.5	687	687
	0.205	687	687	686
	0.206	684.5	687	688.5
	0.207	684	687	686.5
	0.208	683.5	686	688
	0.209	689.5	687.5	689
	0.21	685.5	687.5	687
	0.211	687	689	687
	0.212	686.5	690.5	689
	0.213	688.5	687	686.5
	0.214	689	686.5	689.5
	0.215	686	688	690.5
	0.216	686	686	687
	0.217	684	686	689
	0.218	688.5	684	688
	0.219	686	687	690
	0.22	686	688.5	690.5
	0.221	686	686	688.5
	0.222	687	686	688
	0.223	684.5	689	690
	0.224	687	687.5	688
	0.225	687	686	688
	0.226	689	684.5	689.5
	0.227	687	687.5	686
	0.228	686.5	683.5	689.5
	0.229	689	687.5	689.5
	0.23	685.5	687	688.5
	0.231	685.5	686.5	689
	0.232	687	684.5	690.5
	0.233	685.5	683	687.5
	0.234	685.5	687	686
	0.235	685	686	689.5
	0.236	686	690.5	690
	0.237	688.5	686.5	684
	0.238	687	684	685.5
	0.239	686.5	688.5	688
	0.24	684	685.5	686
	0.241	684	685.5	687
	0.242	689	686.5	687
	0.243	690	687.5	683
	0.244	688	686.5	687
	0.245	685	687	685
	0.246	687.5	687	688
	0.247	685.5	685	685
	0.248	686.5	685.5	689.5
	0.249	689	683	683.5
	0.25	689	688.5	687
	0.251	688	687	686.5
	0.252	684	685	687
	0.253	686.5	688	683
	0.254	687	686.5	689.5
	0.255	687	686.5	689.5
	0.256	687.5	688	685.5
	0.257	690	687	685.5
	0.258	684	686	687.5
	0.259	685.5	687	685
	0.26	685.5	684.5	685
	0.261	686	690.5	687
	0.262	686	684	686.5
	0.263	687	684.5	687
	0.264	684.5	685.5	688.5
	0.265	690	686	687.5
	0.266	688	688.5	686.5
	0.267	689.5	688.5	690.5
	0.268	686	686	687
	0.269	690	686.5	687.5
	0.27	689	689.5	689
	0.271	688.5	684	687.5
	0.272	687.5	686	689.5
	0.273	688.5	686	684
	0.274	686	684	685.5
	0.275	686.5	686.5	685.5
	0.276	687	686.5	685
	0.277	690.5	687	684.5
	0.278	686.5	686.5	687.5
	0.279	687.5	688.5	687.5
	0.28	687	686.5	685
	0.281	688	685.5	686
	0.282	690	692.5	690.5
	0.283	686	684	689.5
	0.284	687	685.5	685.5
	0.285	685.5	690	688.5
	0.286	684.5	685.5	687.5
	0.287	684.5	683.5	685.5
	0.288	692	684.5	685.5
	0.289	690.5	686	683.5
	0.29	687.5	685.5	682.5
	0.291	686	685	684.5
	0.292	686.5	684	686
	0.293	688	686	685.5
	0.294	690	688.5	685
	0.295	688	685	685.5
	0.296	688	686	686.5
	0.297	690.5	686	686
	0.298	688.5	688	685
	0.299	688	688.5	684.5
	0.3	689.5	687.5	688.5
	0.301	685	687	688
	0.302	689.5	686.5	685.5
	0.303	689.5	683.5	688.5
	0.304	690.5	685	688.5
	0.305	686.5	685	685.5
	0.306	688	685	688.5
	0.307	689	686	687.5
	0.308	690.5	680	685
	0.309	690	689	687
	0.31	687	685	687.5
	0.311	685.5	682.5	686.5
	0.312	687	684	684.5
	0.313	688.5	686	687
	0.314	689	683	689
	0.315	685	684.5	685
	0.316	686	685.5	686.5
	0.317	688	684	685
	0.318	688	682	685
	0.319	690	683.5	689.5
	0.32	686.5	683.5	687
	0.321	685	684.5	685.5
	0.322	686.5	686	687.5
	0.323	683.5	685.5	688
	0.324	687	687	686
	0.325	685.5	684.5	686.5
	0.326	684.5	683	688.5
	0.327	682	686.5	689
	0.328	689	684	689
	0.329	686	686	685
	0.33	683	686	686
	0.331	685	686	687.5
	0.332	682	682.5	690.5
	0.333	685	685	686
	0.334	684	687.5	686
	0.335	685.5	683.5	687
	0.336	686	685.5	685.5
	0.337	688	687.5	684.5
	0.338	682.5	681.5	688.5
	0.339	681.5	687.5	686
	0.34	681.5	688	687.5
	0.341	682.5	688.5	690
	0.342	684	685	686
	0.343	685	687	689.5
	0.344	681	687	686.5
	0.345	682.5	687	683.5
	0.346	682.5	688	689
	0.347	683.5	687	687
	0.348	682.5	690.5	688.5
	0.349	677.5	688	687.5
	0.35	681.5	686	688
	0.351	682.5	690	685.5
	0.352	683.5	689	689
	0.353	681.5	688.5	689
	0.354	684	684.5	685.5
	0.355	682	688	690
	0.356	679.5	686.5	690
	0.357	685	688.5	688.5
	0.358	682.5	687.5	687.5
	0.359	685	687	687
	0.36	682.5	688.5	688.5
	0.361	680.5	687.5	688
	0.362	680	689	689
	0.363	682	687.5	689
	0.364	679	686	688.5
	0.365	679	684.5	688.5
	0.366	683	687.5	690.5
	0.367	681.5	685.5	690
	0.368	683	688.5	684
	0.369	681.5	688	690.5
	0.37	683.5	690	686
	0.371	680.5	688.5	684.5
	0.372	682.5	690.5	688.5
	0.373	686	690	691.5
	0.374	681.5	690	687
	0.375	681	688	687
	0.376	683.5	688	690.5
	0.377	684	686.5	690.5
	0.378	683	687.5	690.5
	0.379	686.5	689	690.5
	0.38	683	689	690.5
	0.381	685.5	686	686
	0.382	686	689	687.5
	0.383	683	687	689
	0.384	682.5	688	693.5
	0.385	686	687.5	690.5
	0.386	684	693.5	690.5
	0.387	683.5	686	690.5
	0.388	684.5	686.5	689
	0.389	682.5	687	689.5
	0.39	682.5	684	690.5
	0.391	683.5	687.5	690.5
	0.392	683.5	688.5	690.5
	0.393	681	686	688
	0.394	682.5	686	690.5
	0.395	683	689	689
	0.396	686	689	690
	0.397	690	685.5	692.5
	0.398	685	684	690
	0.399	684.5	684	689.5
	0.4	687	686.5	686.5
	0.401	686	685	690.5
	0.402	686.5	686	690
	0.403	686	684	690.5
	0.404	685.5	688	686.5
	0.405	683	684.5	688.5
	0.406	685	688	690.5
	0.407	687.5	684	689
	0.408	688	688.5	690.5
	0.409	687	684	688
	0.41	690	688.5	688
	0.411	684	684.5	683
	0.412	686.5	682	687.5
	0.413	685	686	687
	0.414	690	682.5	687.5
	0.415	689	687.5	687
	0.416	687.5	684.5	688
	0.417	684.5	685	688.5
	0.418	690.5	686	688.5
	0.419	685.5	688	684
	0.42	685.5	689	685
	0.421	686	685.5	689
	0.422	687.5	686.5	686.5
	0.423	687	684.5	689
	0.424	685	686	685.5
	0.425	690.5	686.5	687
	0.426	685	685	686
	0.427	685.5	687	680.5
	0.428	689	685.5	685.5
	0.429	690	685	685.5
	0.43	688	686	686
	0.431	688	685.5	685
	0.432	692.5	685	684
	0.433	688.5	685.5	685.5
	0.434	686.5	681.5	686
	0.435	690	686.5	685
	0.436	689	685	686
	0.437	687	687.5	683.5
	0.438	690.5	683.5	683.5
	0.439	690.5	686.5	685.5
	0.44	687	684	685.5
	0.441	689.5	686.5	684.5
	0.442	689	684.5	682.5
	0.443	686.5	685	684
	0.444	685	684.5	686
	0.445	688	687.5	685
	0.446	688	686	683.5
	0.447	688	685.5	686.5
	0.448	690	690	687
	0.449	686	685.5	684
	0.45	690.5	687.5	683.5
	0.451	686	687.5	683.5
	0.452	687.5	686	682
	0.453	684	686	686
	0.454	688	685.5	684
	0.455	684.5	687	685
	0.456	690	685	685.5
	0.457	686.5	682	684.5
	0.458	690	679.5	685
	0.459	687	684	685.5
	0.46	688	686.5	683.5
	0.461	685	688.5	687
	0.462	687	686	687
	0.463	685.5	687	684.5
	0.464	686.5	686	688
	0.465	690.5	686.5	683
	0.466	686	687.5	687
	0.467	690.5	683	687
	0.468	688.5	685	687.5
	0.469	690	688.5	687.5
	0.47	687	683.5	686.5
	0.471	688.5	684.5	689
	0.472	685.5	685.5	685
	0.473	687.5	687.5	687
	0.474	690	685.5	688.5
	0.475	686.5	684.5	687
	0.476	690.5	685	687
	0.477	684.5	685.5	687
	0.478	685.5	684.5	687
	0.479	687	688	685.5
	0.48	686.5	686.5	686
	0.481	689.5	688	688.5
	0.482	686.5	682.5	688.5
	0.483	687.5	686	687
	0.484	686	689.5	687
	0.485	686	687	688
	0.486	687	686	685
	0.487	689.5	686.5	687.5
	0.488	686.5	688	687.5
	0.489	687	688	685.5
	0.49	688	689	688.5
	0.491	687	682.5	683.5
	0.492	688	685.5	685
	0.493	686	685	689
	0.494	685.5	683	688.5
	0.495	685.5	684.5	686.5
	0.496	690.5	683	686.5
	0.497	688.5	685.5	685.5
	0.498	682.5	683	684.5
	0.499	687	686	686.5
	0.5	684.5	689	687
	0.501	688.5	686	686
	0.502	685	685.5	690.5
	0.503	688.5	685	685.5
	0.504	686.5	685	687
	0.505	688	685.5	685
	0.506	689	684	686.5
	0.507	683.5	684.5	686
	0.508	686.5	684.5	687
	0.509	688.5	684	686
	0.51	685	680.5	687.5
	0.511	684.5	685.5	685.5
	0.512	688	684	683
	0.513	688.5	684.5	684
	0.514	688	686	690
	0.515	683	685	684
	0.516	689	684	684.5
	0.517	685.5	685	686.5
	0.518	685	684	686
	0.519	687	686	686.5
	0.52	686	683.5	685
	0.521	682.5	687.5	687
	0.522	687	682	688.5
	0.523	682.5	683	688
	0.524	686.5	683	690
	0.525	685	686.5	687.5
	0.526	684.5	686	687
	0.527	689.5	689	684.5
	0.528	686.5	685.5	686.5
	0.529	680.5	681.5	684
	0.53	687.5	684.5	685
	0.531	683	683.5	684
	0.532	684.5	685	689
	0.533	686.5	685.5	683
	0.534	684	683	686.5
	0.535	686.5	683	688
	0.536	684.5	684	688
	0.537	685.5	685	691
	0.538	687	687.5	686
	0.539	690.5	684	686
	0.54	685	688	689.5
	0.541	688	681.5	686
	0.542	686.5	685	686.5
	0.543	684	681.5	685.5
	0.544	685.5	685	686.5
	0.545	685.5	685	690.5
	0.546	682	683.5	689.5
	0.547	687.5	684	690.5
	0.548	686	684	690.5
	0.549	686.5	686.5	690
	0.55	685.5	687.5	685.5
	0.551	687.5	685.5	689.5
	0.552	683	685.5	684
	0.553	687	687	690.5
	0.554	684.5	684.5	687
	0.555	683	687	688
	0.556	686.5	686.5	690.5
	0.557	689	688.5	689.5
	0.558	687	684.5	687.5
	0.559	685	690	689
	0.56	685	687	690
	0.561	684.5	683.5	686.5
	0.562	684	685	687
	0.563	687.5	687.5	690.5
	0.564	684	684	688
	0.565	687.5	686.5	690
	0.566	684	687	689.5
	0.567	684	686	689.5
	0.568	684.5	687	690.5
	0.569	687	690	688
	0.57	687.5	686	690.5
	0.571	684.5	686	692.5
	0.572	684	686	690.5
	0.573	685.5	682.5	690.5
	0.574	685	688.5	690
	0.575	688	684	689
	0.576	684	689	690.5
	0.577	686.5	684	689
	0.578	688	686.5	690.5
	0.579	685	686	690
	0.58	689	687.5	689
	0.581	684	683.5	690.5
	0.582	687	685.5	689.5
	0.583	686	687.5	686
	0.584	682	689.5	690.5
	0.585	685	687.5	688
	0.586	686.5	685	689.5
	0.587	686.5	687.5	689.5
	0.588	687	690	688
	0.589	688	687.5	687.5
	0.59	684.5	688	690
	0.591	685	690	686.5
	0.592	683	687.5	686
	0.593	685.5	685.5	688
	0.594	684	685	689
	0.595	687	687.5	688
	0.596	684.5	689	689.5
	0.597	682.5	687	686.5
	0.598	683.5	688	687
	0.599	684	690.5	690.5
	0.6	687.5	688	687
	0.601	686	687	689
	0.602	684.5	689	689.5
	0.603	684.5	688	687
	0.604	682.5	687	689.5
	0.605	683.5	688	684.5
	0.606	686	684	688
	0.607	684.5	687	685
	0.608	684	690	684
	0.609	686	690	688
	0.61	684	690	685.5
	0.611	684	686	689.5
	0.612	683.5	687.5	685.5
	0.613	679.5	691.5	689
	0.614	684	690	684.5
	0.615	684	686	687
	0.616	686.5	689.5	684.5
	0.617	684	688.5	684
	0.618	684	688	686
	0.619	684	689.5	688.5
	0.62	684.5	687.5	685.5
	0.621	686	690.5	689
	0.622	685	688	683.5
	0.623	684	690.5	688.5
	0.624	683.5	687.5	689.5
	0.625	685	686	689
	0.626	687	690	690.5
	0.627	685.5	687	687
	0.628	685	690.5	689
	0.629	683.5	687.5	688
	0.63	681.5	687	685
	0.631	684.5	689.5	688.5
	0.632	684.5	690	682.5
	0.633	684	684	685
	0.634	683	686	687.5
	0.635	687	685	688.5
	0.636	686.5	686	688
	0.637	683.5	686	685.5
	0.638	683	690	685.5
	0.639	686	686.5	685.5
	0.64	682.5	687	688.5
	0.641	682.5	688	686.5
	0.642	687	687	686
	0.643	685	689	683.5
	0.644	686.5	689	687
	0.645	688	685	690.5
	0.646	690.5	689	686.5
	0.647	684	684.5	684
	0.648	686	685	685
	0.649	688	688.5	687
	0.65	690.5	689.5	688
	0.651	686.5	689.5	684.5
	0.652	686.5	685	683.5
	0.653	687	686	686
	0.654	689	688.5	687
	0.655	689.5	687	684
	0.656	687	684.5	686.5
	0.657	684	685	684.5
	0.658	692	689	685.5
	0.659	686	687	686
	0.66	689.5	687.5	689
	0.661	688	685	685.5
	0.662	690.5	689	683.5
	0.663	686.5	685	688.5
	0.664	690.5	688	686
	0.665	689	686.5	685
	0.666	689	686.5	684
	0.667	687.5	686.5	689.5
	0.668	690.5	685	687.5
	0.669	690.5	685	685
	0.67	689	686	686
	0.671	688	684	687.5
	0.672	692	689	690
	0.673	689.5	684	689.5
	0.674	692.5	688	689.5
	0.675	688.5	687	689.5
	0.676	690.5	685.5	688
	0.677	687	686	689
	0.678	690.5	684	685
	0.679	688.5	687.5	687
	0.68	692	688	684.5
	0.681	687.5	688	687
	0.682	690.5	685	689.5
	0.683	690	687	685
	0.684	691.5	685	687.5
	0.685	692.5	688.5	686.5
	0.686	687	688	690
	0.687	688.5	687	687.5
	0.688	690.5	686.5	687.5
	0.689	690.5	689.5	686
	0.69	690	684.5	686
	0.691	688	687.5	688
	0.692	688	688	687
	0.693	684	687	686
	0.694	687	686	688.5
	0.695	687.5	687	688
	0.696	687.5	688.5	682
	0.697	683.5	688.5	688
	0.698	684	687	688
	0.699	689.5	688	690
	0.7	684	688	687.5
	0.701	686	686	688
	0.702	685	686.5	689.5
	0.703	687.5	686	687
	0.704	684	689.5	687.5
	0.705	684.5	687	687
	0.706	684.5	686.5	688.5
	0.707	684.5	688.5	690.5
	0.708	681	686	688
	0.709	686	687	686
	0.71	682.5	685.5	689
	0.711	684.5	683	686.5
	0.712	681.5	686.5	687.5
	0.713	687	689.5	687
	0.714	680	683.5	690
	0.715	682	685	689.5
	0.716	683	687	688.5
	0.717	681	684.5	685
	0.718	682.5	687	686.5
	0.719	684	685.5	684.5
	0.72	685	687	686.5
	0.721	681	684	686.5
	0.722	684	685	685
	0.723	683.5	682.5	687.5
	0.724	682	683.5	684.5
	0.725	682.5	684	685
	0.726	682	684	688
	0.727	683	684	688.5
	0.728	683	682.5	688.5
	0.729	684	685	688.5
	0.73	686.5	688	689.5
	0.731	682.5	685.5	683
	0.732	686.5	687.5	684
	0.733	681	684	686
	0.734	683.5	684.5	687.5
	0.735	681.5	684	686.5
	0.736	683.5	684	685.5
	0.737	681	683.5	686.5
	0.738	682	683.5	686.5
	0.739	681.5	684.5	687
	0.74	683.5	685.5	685.5
	0.741	682	685.5	686
	0.742	682.5	688.5	685.5
	0.743	682	684.5	685.5
	0.744	682	688.5	688
	0.745	684	681.5	685
	0.746	685.5	684	688.5
	0.747	688.5	687	684
	0.748	683.5	684.5	690.5
	0.749	684.5	685	687.5
	0.75	687	683.5	684.5
	0.751	683.5	685	690
	0.752	685	687	689.5
	0.753	685	689.5	688
	0.754	685	682.5	687
	0.755	684	683.5	689
	0.756	685	684.5	686.5
	0.757	686	684	686
	0.758	687	684.5	688
	0.759	685	683.5	689
	0.76	686.5	683.5	687.5
	0.761	687	685	686.5
	0.762	683	685.5	683.5
	0.763	685	684.5	687.5
	0.764	686	685	686
	0.765	683.5	685.5	687.5
	0.766	683.5	686	686.5
	0.767	681.5	687	690
	0.768	686	689	690.5
	0.769	684.5	686	689.5
	0.77	687	686	688
	0.771	686.5	685	686
	0.772	685.5	683.5	688.5
	0.773	687	684	687
	0.774	686.5	685.5	688.5
	0.775	686.5	685	689.5
	0.776	685	685	689
	0.777	686	687.5	686.5
	0.778	685	689.5	689
	0.779	687	686	689
	0.78	684	688	687
	0.781	683	685	689
	0.782	688.5	687	687
	0.783	683.5	687.5	687.5
	0.784	684.5	685	689.5
	0.785	687.5	686	689
	0.786	686	690	687
	0.787	690	684	684
	0.788	686.5	688.5	689
	0.789	685	686.5	687
	0.79	685	686	685.5
	0.791	686	685.5	685
	0.792	685	688.5	689.5
	0.793	683.5	689.5	686.5
	0.794	686	687	686.5
	0.795	685	688	688
	0.796	685	689.5	686.5
	0.797	687	685	689
	0.798	685.5	686	688.5
	0.799	686.5	688	687
	0.8	690.5	685	687.5
	0.801	687.5	686	689
	0.802	687	687	692
	0.803	688.5	685	688
	0.804	690.5	686	688
	0.805	690.5	687	686.5
	0.806	687	685	687.5
	0.807	685.5	686	688
	0.808	684.5	688	690.5
	0.809	684	687	688.5
	0.81	684	690	688.5
	0.811	683.5	685	686
	0.812	689	684.5	687
	0.813	688.5	687.5	688
	0.814	687	684	689.5
	0.815	685.5	687	690.5
	0.816	685.5	690	686
	0.817	688.5	687.5	688
	0.818	684.5	688.5	687.5
	0.819	684	689.5	689.5
	0.82	686	689.5	689
	0.821	688.5	686	687.5
	0.822	683.5	688	689
	0.823	687	683.5	689.5
	0.824	685	686.5	690.5
	0.825	687.5	686	690
	0.826	685	682.5	689.5
	0.827	684.5	685	688.5
	0.828	683	686	689
	0.829	688	687.5	690
	0.83	688.5	687.5	693
	0.831	686	684.5	690.5
	0.832	690.5	687	688
	0.833	687	689.5	689
	0.834	687	688	690.5
	0.835	689	686.5	690.5
	0.836	686	686.5	686.5
	0.837	686.5	683	688.5
	0.838	685	686	687
	0.839	688	687	685
	0.84	690	684	690.5
	0.841	687	688.5	686.5
	0.842	687	686.5	687
	0.843	689.5	684.5	689
	0.844	687	687	690
	0.845	685.5	687.5	689
	0.846	689	686.5	690.5
	0.847	688	686	686
	0.848	687.5	687.5	688.5
	0.849	689	687	689
	0.85	689.5	685	687.5
	0.851	688.5	686.5	688.5
	0.852	692	688	689
	0.853	689.5	689	688.5
	0.854	688	687	689.5
	0.855	689	683.5	684
	0.856	687	688.5	683.5
	0.857	689	683.5	687.5
	0.858	686.5	688.5	687
	0.859	689	689	687.5
	0.86	686.5	687	686
	0.861	689.5	689.5	686.5
	0.862	687	688.5	684
	0.863	687	685.5	686
	0.864	688	687.5	684.5
	0.865	687	690	684.5
	0.866	692.5	684.5	683
	0.867	688.5	688.5	683.5
	0.868	690	686.5	689.5
	0.869	688.5	686.5	687.5
	0.87	688	692.5	685
	0.871	690.5	688	684.5
	0.872	686.5	690.5	685
	0.873	689.5	688	683.5
	0.874	689	689.5	683.5
	0.875	688	688.5	684
	0.876	687.5	687	685.5
	0.877	686.5	686.5	683.5
	0.878	686.5	688	686.5
	0.879	689	685.5	684.5
	0.88	689.5	686	683.5
	0.881	689.5	689	689.5
	0.882	688	688	684
	0.883	686.5	691.5	684.5
	0.884	689.5	690.5	685
	0.885	686.5	692.5	684
	0.886	686	693.5	684
	0.887	687	690.5	684.5
	0.888	686	690.5	685
	0.889	686	690.5	688
	0.89	688	688.5	683.5
	0.891	689.5	688	686
	0.892	687	690.5	683.5
	0.893	688.5	690.5	685
	0.894	686	688	683.5
	0.895	688.5	690.5	687
	0.896	689	690.5	683
	0.897	687.5	690.5	684.5
	0.898	685.5	692.5	685.5
	0.899	688	690.5	686.5
	0.9	689	689.5	687
	0.901	685.5	689	685
	0.902	687.5	692.5	687
	0.903	688	687	688
	0.904	690.5	692	685
	0.905	684	690	687
	0.906	684.5	689	684.5
	0.907	687	688	683.5
	0.908	687	690.5	683.5
	0.909	687	690.5	686.5
	0.91	688.5	689	687
	0.911	688.5	688.5	685.5
	0.912	687	685	685
	0.913	685.5	690.5	682.5
	0.914	685.5	689	686
	0.915	688.5	687	687
	0.916	687.5	687	688.5
	0.917	684	686	684
	0.918	684	689	685.5
	0.919	683.5	688.5	686.5
	0.92	685	689	682.5
	0.921	688	686.5	683.5
	0.922	685	688	682.5
	0.923	688	684	686
	0.924	686.5	688.5	684
	0.925	683.5	688	687.5
	0.926	683.5	685.5	685
	0.927	685	687	683.5
	0.928	684	687	685.5
	0.929	689.5	687.5	686
	0.93	685.5	682.5	690.5
	0.931	683.5	686	685.5
	0.932	684	690	686.5
	0.933	681.5	690.5	684.5
	0.934	685.5	687	686
	0.935	685	685	684
	0.936	687	684.5	684
	0.937	686	683.5	687
	0.938	684	686.5	684
	0.939	682	685	683
	0.94	687	684	683
	0.941	686.5	684	688
	0.942	688	685	684
	0.943	686.5	686	684.5
	0.944	687.5	685	687
	0.945	682	685	686
	0.946	685.5	684	684
	0.947	685	689.5	685
	0.948	685	683.5	685
	0.949	684.5	682.5	684
	0.95	681.5	684	684
	0.951	687	685	685.5
	0.952	687.5	683.5	683
	0.953	684.5	685	688
	0.954	688	687	684.5
	0.955	685	685	686.5
	0.956	687.5	684.5	685.5
	0.957	686.5	684.5	686
	0.958	687.5	683	687.5
	0.959	687	686.5	685.5
	0.96	685	682.5	685.5
	0.961	687	687	685
	0.962	684	682.5	690
	0.963	684.5	685.5	689.5
	0.964	682.5	683.5	686
	0.965	685.5	683.5	689
	0.966	683	685	687
	0.967	685.5	683	689.5
	0.968	685	689	691.5
	0.969	684	684.5	689.5
	0.97	686.5	685	689
	0.971	689.5	683.5	687.5
	0.972	686	681.5	689
	0.973	684	684	689
	0.974	687	680.5	690.5
	0.975	687.5	684	688.5
	0.976	690	684	693.5
	0.977	688.5	686	689
	0.978	690	682	687
	0.979	690	684.5	685
	0.98	687	681	690.5
	0.981	687.5	683.5	692.5
	0.982	689	681.5	688.5
	0.983	688.5	687.5	688.5
	0.984	685	686.5	690.5
	0.985	689.5	686.5	687
	0.986	686.5	685	690.5
	0.987	687	684.5	689
	0.988	688.5	685.5	690.5
	0.989	687	688.5	688
	0.99	687.5	685.5	689
	0.991	689	687	692.5
	0.992	692	686	690.5
	0.993	687	684.5	690.5
	0.994	689	689.5	690.5
	0.995	689	684	692
	0.996	686.5	686.5	690
	0.997	687	685	688.5
	0.998	686.5	687	686
	0.999	690	685.5	687.5
	1	687.5	686	690.5
	1.001	687	688.5	690.5
	1.002	685	686.5	690.5
	1.003	688	687.5	689
	1.004	683	688	689.5
	1.005	685.5	686.5	690
	1.006	687	688.5	689.5
	1.007	687	689.5	690.5
	1.008	685	688.5	687.5
	1.009	685	686.5	688.5
	1.01	685	684	694
	1.011	685.5	686.5	690
	1.012	686	685.5	690.5
	1.013	683	685	693
	1.014	684.5	686.5	690
	1.015	685.5	686	688.5
	1.016	682.5	684	689
	1.017	686.5	683.5	691.5
	1.018	681.5	684	690.5
	1.019	685	684	694
	1.02	686	686.5	688
	1.021	683.5	683	690
	1.022	687	686	693
	1.023	685	684.5	686
	1.024	686.5	684.5	688
	1.025	685.5	685.5	688
	1.026	683.5	687	690.5
	1.027	684	682.5	690.5
	1.028	686.5	688	688.5
	1.029	686	684	686.5
	1.03	688	684	688
	1.031	685.5	685	688
	1.032	686	686	685.5
	1.033	687	687.5	690.5
	1.034	686.5	686	690
	1.035	687	688	686
	1.036	684.5	684.5	689
	1.037	685.5	689.5	687.5
	1.038	685	685	690
	1.039	685	685	687
	1.04	687	684.5	686
	1.041	688.5	687	688
	1.042	690.5	687	684
	1.043	687	686	689
	1.044	688.5	687	684
	1.045	684	688.5	685
	1.046	695.5	684.5	684
	1.047	688.5	683.5	683.5
	1.048	692	686	686.5
	1.049	687.5	685	688.5
	1.05	687	684	685.5
	1.051	689	685	685.5
	1.052	687	687	685
	1.053	688	687	688.5
	1.054	687.5	685	684
	1.055	694	689	682.5
	1.056	693	685.5	690.5
	1.057	692	686	686
	1.058	687.5	685	686.5
	1.059	690.5	686	687
	1.06	690.5	684.5	685.5
	1.061	689	687	683.5
	1.062	689.5	686.5	690
	1.063	689.5	686.5	687
	1.064	687.5	687	685
	1.065	693	686.5	685
	1.066	692.5	684	687
	1.067	692.5	685.5	684.5
	1.068	690.5	684.5	684
	1.069	692.5	688.5	686.5
	1.07	685	688	686.5
	1.071	690.5	685	688
	1.072	687.5	687.5	686.5
	1.073	690.5	684.5	684
	1.074	685.5	689.5	688
	1.075	692	688.5	687
	1.076	690.5	684.5	686
	1.077	690.5	684	685
	1.078	688	689.5	686
	1.079	690.5	686	687.5
	1.08	687.5	690.5	686.5
	1.081	689.5	689.5	685.5
	1.082	685.5	684.5	686
	1.083	689	688.5	687.5
	1.084	690.5	691.5	686
	1.085	686	688	685.5
	1.086	689.5	684.5	685
	1.087	687.5	686	685.5
	1.088	687	688	684.5
	1.089	685.5	689	685.5
	1.09	684	686.5	688.5
	1.091	684.5	684.5	690.5
	1.092	685	685.5	689.5
	1.093	682.5	689	686.5
	1.094	683.5	687	689.5
	1.095	686.5	690.5	687
	1.096	684	688	684.5
	1.097	684	687.5	689
	1.098	683.5	690	689
	1.099	684	684.5	688
	1.1	684.5	687	688
	1.101	678.5	689.5	689
	1.102	682.5	689	689.5
	1.103	684	685	689.5
	1.104	682	690	688
	1.105	681.5	686	690.5
	1.106	682	683	686
	1.107	680	686.5	684.5
	1.108	676	688	686
	1.109	682.5	690.5	687
	1.11	682.5	690	687.5
	1.111	683.5	687.5	689.5
	1.112	685	686	687.5
	1.113	681	689.5	686
	1.114	681.5	690.5	684
	1.115	679	685	689
	1.116	681.5	687	684
	1.117	678.5	688	689.5
	1.118	680.5	686	686
	1.119	683.5	686.5	685.5
	1.12	683.5	688.5	685.5
	1.121	683.5	686	687
	1.122	680	685	684.5
	1.123	680.5	688	687
	1.124	677	686.5	687.5
	1.125	681.5	689	687.5
	1.126	681	689.5	689
	1.127	682	684.5	684
	1.128	679	690.5	684
	1.129	684	685	685.5
	1.13	683.5	687	690.5
	1.131	682	687.5	688
	1.132	681	685.5	683.5
	1.133	685	689	687
	1.134	681.5	686.5	687.5
	1.135	683	689.5	690.5
	1.136	680	687	692
	1.137	679	686	685
	1.138	684	688.5	686.5
	1.139	681.5	687	686
	1.14	681	688	684.5
	1.141	682	686.5	687
	1.142	683.5	687	686
	1.143	683.5	689	688
	1.144	681.5	682.5	685.5
	1.145	681.5	688	688.5
	1.146	682	685.5	686.5
	1.147	683.5	686.5	682
	1.148	684	686	685.5
	1.149	683.5	679.5	688
	1.15	682.5	684.5	686
	1.151	683.5	682.5	685
	1.152	678	683	684
	1.153	684	685	687
	1.154	685	687	688.5
	1.155	680.5	686	689
	1.156	684	685	687
	1.157	686	682.5	688
	1.158	685	686.5	689.5
	1.159	685	685	685
	1.16	683.5	683	686
	1.161	681.5	686.5	685
	1.162	685	684.5	686.5
	1.163	688	683	687
	1.164	689	684.5	685
	1.165	687	685.5	689
	1.166	688	687	688
	1.167	689.5	689	690.5
	1.168	686	684.5	688
	1.169	685	686	687
	1.17	689.5	684	686.5
	1.171	689	683.5	687
	1.172	689	687	690
	1.173	682.5	684	687.5
	1.174	685.5	684	689
	1.175	686.5	687	689.5
	1.176	689	684.5	690
	1.177	684.5	682.5	686.5
	1.178	687.5	682.5	688
	1.179	686.5	686	689
	1.18	686	684	688
	1.181	686.5	684.5	686
	1.182	686.5	683	687.5
	1.183	688	683.5	690.5
	1.184	684	684	687
	1.185	690.5	685.5	690
	1.186	688.5	684	686
	1.187	688.5	684.5	691.5
	1.188	690.5	685	687
	1.189	690	684	689
	1.19	688	678.5	689
	1.191	687.5	684.5	688.5
	1.192	690.5	682.5	687
	1.193	690.5	682.5	688
	1.194	690	682.5	687
	1.195	690.5	684.5	690
	1.196	690	685.5	686.5
	1.197	687	688	687.5
	1.198	689	687	687.5
	1.199	687.5	686.5	688.5
	1.2	690.5	679.5	689
	1.201	688.5	689	687
	1.202	687	688	689.5
	1.203	688.5	684	689
	1.204	690.5	686.5	689.5
	1.205	689	686.5	688.5
	1.206	689	686.5	690.5
	1.207	687	686.5	689.5
	1.208	688.5	685	688.5
	1.209	692.5	683	685.5
	1.21	691.5	683	686
	1.211	688.5	687.5	685
	1.212	686.5	686	689.5
	1.213	692.5	686.5	686.5
	1.214	690.5	685	686
	1.215	690.5	684.5	688
	1.216	689	687	689.5
	1.217	688.5	686	688
	1.218	690	686.5	690.5
	1.219	687	683.5	688.5
	1.22	689	685.5	686
	1.221	687.5	682.5	684
	1.222	687	687	684
	1.223	686	686	688
	1.224	690.5	689	684
	1.225	686.5	685	686
	1.226	689.5	684	687
	1.227	689	688	687.5
	1.228	690	687	687
	1.229	686.5	686	689
	1.23	688	688	685
	1.231	691.5	688	687
	1.232	689	690	684
	1.233	690.5	687.5	688
	1.234	687.5	687.5	684.5
	1.235	687.5	687	684.5
	1.236	685	685	687.5
	1.237	688	686.5	686.5
	1.238	688	687	684
	1.239	686	690.5	686
	1.24	690	689.5	687
	1.241	689	688.5	686
	1.242	687.5	687	691.5
	1.243	687	687	687
	1.244	688	686	685
	1.245	686	685	687
	1.246	686.5	685	687
	1.247	686	687	687.5
	1.248	686.5	692	689
	1.249	686	688.5	688
	1.25	686.5	689	689.5
	1.251	689	688	687.5
	1.252	688.5	688	686.5
	1.253	685.5	690.5	688.5
	1.254	687.5	685	688
	1.255	688	690	690.5
	1.256	688	688	689
	1.257	688	690.5	686
	1.258	690.5	689	690
	1.259	687	690	686.5
	1.26	691.5	689.5	690.5
	1.261	688	687.5	689
	1.262	690	686	691.5
	1.263	684.5	686	685.5
	1.264	686	687	690.5
	1.265	690	684.5	690
	1.266	689	686	688.5
	1.267	690	687	689
	1.268	685.5	688.5	689.5
	1.269	686	689.5	689
	1.27	689.5	686.5	687.5
	1.271	689	687.5	688
	1.272	689.5	689	688.5
	1.273	685.5	685	690
	1.274	686.5	689.5	685
	1.275	688	685	690.5
	1.276	687.5	689	690
	1.277	683	686.5	692
	1.278	684.5	686	688.5
	1.279	683.5	688	684
	1.28	688.5	684	690.5
	1.281	686	687.5	689.5
	1.282	688	686.5	688.5
	1.283	685.5	684	689.5
	1.284	684.5	684	687
	1.285	686.5	685.5	688.5
	1.286	682.5	686.5	688
	1.287	684.5	684	688.5
	1.288	686	687	692.5
	1.289	684	683	686
	1.29	687	685	686.5
	1.291	685	684.5	684.5
	1.292	682	683.5	686
	1.293	685	682	684
	1.294	687	685.5	687.5
	1.295	682.5	683.5	689.5
	1.296	686	681.5	687.5
	1.297	680.5	684	688.5
	1.298	685.5	682.5	686.5
	1.299	684.5	681.5	689
	1.3	684	684	686.5
	1.301	686	685.5	686.5
	1.302	683.5	684	684
	1.303	684	683	686
	1.304	686	685	684
	1.305	682.5	683.5	687
	1.306	685	688	685.5
	1.307	683.5	682.5	686.5
	1.308	684.5	687	685
	1.309	685	683	684
	1.31	683.5	683.5	684
	1.311	681	683.5	684.5
	1.312	682	683	686
	1.313	683.5	686	683.5
	1.314	680.5	686	687
	1.315	680	684.5	685
	1.316	686.5	687	687.5
	1.317	683	682.5	683.5
	1.318	683.5	687	684
	1.319	684	684	683.5
	1.32	684.5	685	684
	1.321	684	684.5	684
	1.322	682	690.5	684
	1.323	684	687	687.5
	1.324	682	689	684
	1.325	681.5	686.5	682.5
	1.326	684	685.5	682
	1.327	683.5	685.5	682.5
	1.328	680.5	686	684
	1.329	685	684	685.5
	1.33	682	686.5	685
	1.331	684.5	687	684
	1.332	685	684.5	686
	1.333	683	685.5	683.5
	1.334	685	686	684.5
	1.335	684	686	685
	1.336	685.5	684.5	687
	1.337	683.5	687	688
	1.338	684	685	682.5
	1.339	683	689.5	686.5
	1.34	681	686.5	685
	1.341	684.5	687	685.5
	1.342	685	686.5	685
	1.343	684	689	685
	1.344	686	692	682
	1.345	684	687	682.5
	1.346	686.5	688.5	684
	1.347	683.5	689.5	682.5
	1.348	683	688.5	681.5
	1.349	683	687	684.5
	1.35	687	690.5	686.5
	1.351	687	689	680
	1.352	684.5	690.5	684
	1.353	687	690.5	683.5
	1.354	681	687	679.5
	1.355	684	689	682
	1.356	686.5	690.5	679.5
	1.357	682.5	688	680.5
	1.358	686.5	687.5	684
	1.359	685	693	683.5
	1.36	683	690	683
	1.361	684.5	688.5	685
	1.362	684	689.5	683
	1.363	685	691.5	684
	1.364	683	689.5	683.5
	1.365	685	690.5	685
	1.366	686	688.5	686
	1.367	685	688.5	683.5
	1.368	685	690.5	684.5
	1.369	688.5	690.5	682.5
	1.37	684	689	685
	1.371	684	686.5	685
	1.372	687	687.5	683.5
	1.373	685.5	685	684
	1.374	685.5	694	684
	1.375	685.5	687	685
	1.376	688	689.5	684.5
	1.377	685	689.5	681
	1.378	687	687.5	681.5
	1.379	686.5	687.5	685.5
	1.38	687	687	685
	1.381	685.5	686	683
	1.382	682.5	687	684.5
	1.383	682	690.5	685.5
	1.384	685	685.5	684
	1.385	684	689.5	683.5
	1.386	689	685	684
	1.387	687	683.5	683.5
	1.388	684.5	690.5	685
	1.389	682	690	686
	1.39	687.5	687	684.5
	1.391	685	684	686.5
	1.392	683.5	685.5	685
	1.393	685	687	683
	1.394	684	686.5	685
	1.395	683.5	688.5	684.5
	1.396	684.5	690	685
	1.397	686	687	684.5
	1.398	685	686.5	686.5
	1.399	686	685.5	684.5
	1.4	686	687	688.5
	1.401	686	684	683
	1.402	682	686.5	688
	1.403	684	683.5	687
	1.404	686	683	689.5
	1.405	685	688	686
	1.406	688	683	690.5
	1.407	685.5	684	686
	1.408	686.5	685	689
	1.409	687.5	686	687
	1.41	689	684	690.5
	1.411	686	684	690
	1.412	687.5	684	689.5
	1.413	686	684.5	690
	1.414	690	686	688
	1.415	686	680.5	690.5
	1.416	686	684	690.5
	1.417	685	684.5	692
	1.418	687	681.5	687.5
	1.419	690.5	684	686
	1.42	690.5	682.5	687.5
	1.421	690.5	684.5	690
	1.422	690.5	684.5	690.5
	1.423	690	683.5	690.5
	1.424	689.5	683.5	690
	1.425	690.5	682.5	686.5
	1.426	689	680.5	690.5
	1.427	690.5	684.5	691.5
	1.428	690.5	688	690
	1.429	690.5	684	690.5
	1.43	690.5	684	690.5
	1.431	693.5	682	689.5
	1.432	690	681.5	690
	1.433	690	684	688
	1.434	692	684	689.5
	1.435	690.5	682.5	690
	1.436	690.5	685	687
	1.437	690.5	683.5	690.5
	1.438	690.5	684	690.5
	1.439	693.5	682.5	689
	1.44	691.5	681.5	690
	1.441	692.5	687	688
	1.442	690	685	689
	1.443	691.5	686.5	689
	1.444	690.5	683.5	687.5
	1.445	690.5	683.5	686
	1.446	690.5	681	690
	1.447	694.5	683.5	683.5
	1.448	692.5	687	689.5
	1.449	690	687	688.5
	1.45	687.5	683	688.5
	1.451	690.5	683.5	690.5
	1.452	690	687	688
	1.453	689	687	690.5
	1.454	690	687	688.5
	1.455	689.5	688	687
	1.456	688.5	683.5	689
	1.457	691.5	686	688
	1.458	685.5	686	690.5
	1.459	690	686	686
	1.46	690.5	683	686
	1.461	686	684	686
	1.462	686.5	684.5	684.5
	1.463	686	684	687.5
	1.464	688.5	684.5	686
	1.465	684.5	683.5	684.5
	1.466	689	685	686.5
	1.467	687.5	686	685
	1.468	690	685.5	687
	1.469	689.5	685.5	688.5
	1.47	690.5	686	683
	1.471	688.5	685	686.5
	1.472	689.5	684.5	688.5
	1.473	688	689.5	685
	1.474	684.5	683	688
	1.475	690.5	686	686.5
	1.476	688.5	687.5	685.5
	1.477	683	685	689.5
	1.478	684.5	685	686.5
	1.479	686	688	684
	1.48	686.5	685.5	686
	1.481	683	689	688
	1.482	684	690.5	686
	1.483	690.5	687.5	685
	1.484	683.5	685.5	688.5
	1.485	687	685	686.5
	1.486	686	688.5	686.5
	1.487	684	690.5	686
	1.488	684	688.5	685.5
	1.489	681	688	690
	1.49	684.5	686	687.5
	1.491	683.5	687	690.5
	1.492	683.5	687	687.5
	1.493	685	687.5	684
	1.494	679.5	685	686
	1.495	683	683.5	686
	1.496	683.5	686.5	689.5
	1.497	681.5	687.5	686.5
	1.498	683	685.5	689.5
	1.499	681.5	687	686
	1.5	683.5	687	687.5
	1.501	681	689.5	688
	1.502	682.5	689	686
	1.503	681.5	688	686
	1.504	679.5	687.5	690.5
	1.505	681	685	692
	1.506	681	688	689.5
	1.507	680	684.5	687.5
	1.508	680	687.5	689.5
	1.509	683.5	686.5	690.5
	1.51	680.5	687.5	690.5
	1.511	682	686	690.5
	1.512	686	683.5	688.5
	1.513	681.5	685	690.5
	1.514	683	690.5	692
	1.515	679	685	690
	1.516	683	688	690.5
	1.517	684.5	686	690.5
	1.518	681	689	692.5
	1.519	680	687	690.5
	1.52	685.5	686.5	689
	1.521	685	687	688.5
	1.522	683.5	687	691.5
	1.523	684	686.5	690.5
	1.524	688	687.5	688.5
	1.525	683.5	688	693
	1.526	685	689.5	687.5
	1.527	683.5	686.5	692.5
	1.528	683	689.5	689.5
	1.529	686	686	688.5
	1.53	685	684	690.5
	1.531	687	687.5	689.5
	1.532	689	688	688.5
	1.533	685.5	684	690
	1.534	689.5	687.5	690.5
	1.535	688	685.5	690
	1.536	689.5	686	690
	1.537	689.5	690.5	687
	1.538	687	690	687.5
	1.539	688.5	690	684
	1.54	691.5	690.5	688.5
	1.541	690	690.5	682.5
	1.542	690.5	686.5	686.5
	1.543	686.5	689	684
	1.544	687.5	689	686.5
	1.545	686.5	686	685
	1.546	690.5	690.5	681.5
	1.547	689	687	684
	1.548	687.5	689.5	685.5
	1.549	689	690	682.5
	1.55	690.5	686.5	685
	1.551	688.5	687.5	682
	1.552	688	685	682
	1.553	691.5	687	681.5
	1.554	690	685.5	681.5
	1.555	690.5	690	681.5
	1.556	690.5	685.5	684
	1.557	693.5	687.5	683
	1.558	690.5	690.5	681.5
	1.559	688.5	684	680
	1.56	689.5	687	680.5
	1.561	690.5	686	683.5
	1.562	688	687.5	682
	1.563	695	687.5	682
	1.564	690.5	688.5	682.5
	1.565	690.5	690.5	682.5
	1.566	690	683.5	683
	1.567	689	687	684
	1.568	687	686.5	684.5
	1.569	692.5	689	682
	1.57	689.5	687.5	683
	1.571	690	685.5	685.5
	1.572	694	685.5	690
	1.573	691.5	687.5	685
	1.574	689	687.5	690
	1.575	690.5	688.5	685.5
	1.576	692	690.5	686
	1.577	689	689	687.5
	1.578	690.5	690.5	683.5
	1.579	690.5	685	686.5
	1.58	690.5	686.5	689
	1.581	689	687.5	686
	1.582	686.5	690.5	684.5
	1.583	690	686.5	688.5
	1.584	690.5	684.5	688
	1.585	687.5	689.5	688
	1.586	692.5	687	689.5
	1.587	690.5	690.5	687.5
	1.588	690.5	687	688.5
	1.589	692.5	689.5	689.5
	1.59	692	687	689
	1.591	690.5	686.5	689.5
	1.592	690	687.5	690.5
	1.593	692.5	687	687
	1.594	693.5	685	689.5
	1.595	693.5	688	686.5
	1.596	690.5	688.5	690.5
	1.597	692	684	689.5
	1.598	693	689	686
	1.599	693	686.5	690.5
	1.6	696	683.5	687
	1.601	691	684.5	685.5
	1.602	693.5	684	689.5
	1.603	693.5	687	685.5
	1.604	694.5	686	690.5
	1.605	693.5	687.5	694.5
	1.606	695.5	685.5	689
	1.607	694	684.5	687.5
	1.608	692	687.5	690.5
	1.609	694.5	689	689.5
	1.61	696.5	683.5	686.5
	1.611	697	686.5	686.5
	1.612	694.5	688.5	688
	1.613	694	684	689.5
	1.614	690.5	680.5	688
	1.615	697	687	687.5
	1.616	692.5	685	688.5
	1.617	694.5	685.5	685.5
	1.618	695.5	683.5	689
	1.619	693	685	689.5
	1.62	694.5	684.5	690.5
	1.621	692.5	685	690
	1.622	696	682	687
	1.623	696	684.5	688.5
	1.624	695	686	687
	1.625	694	683.5	686.5
	1.626	694.5	683.5	690
	1.627	694.5	684	688
	1.628	694	686	687
	1.629	694	686	689.5
	1.63	690.5	681.5	687.5
	1.631	693	686.5	688.5
	1.632	692	682	690.5
	1.633	693.5	684.5	688.5
	1.634	695.5	684	689
	1.635	690	684	688
	1.636	690.5	684.5	690.5
	1.637	690.5	688	687
	1.638	690.5	684	687.5
	1.639	690.5	684	687.5
	1.64	690.5	685	688
	1.641	689	686.5	689.5
	1.642	692.5	684.5	689
	1.643	695.5	689	689
	1.644	690	687.5	687
	1.645	688	684	690.5
	1.646	689	685	689
	1.647	687.5	687.5	687.5
	1.648	687.5	684	690
	1.649	689	685.5	686.5
	1.65	687.5	684	688.5
	1.651	685	686	688
	1.652	685	683.5	689
	1.653	686	683	688
	1.654	683.5	684	684.5
	1.655	685	684.5	686
	1.656	684	684	687.5
	1.657	681.5	684	686.5
	1.658	684.5	683	684.5
	1.659	685.5	686	690.5
	1.66	681	683.5	686
	1.661	679.5	682	686.5
	1.662	681	684	692
	1.663	679	686.5	690.5
	1.664	678.5	682.5	690
	1.665	678.5	683	690.5
	1.666	678	684	688.5
	1.667	675	683	689
	1.668	676	684.5	690
	1.669	676	684.5	690.5
	1.67	675	681.5	690.5
	1.671	676	685	689.5
	1.672	677.5	683.5	690.5
	1.673	673	681.5	690
	1.674	672	682	692
	1.675	670	681.5	692.5
	1.676	670.5	684.5	691.5
	1.677	670	682.5	694
	1.678	669.5	684	688.5
	1.679	671	679.5	690.5
	1.68	670.5	684.5	690.5
	1.681	670	685.5	694
	1.682	668	678	690.5
	1.683	666	684.5	694.5
	1.684	666.5	682	695
	1.685	663.5	684	694.5
	1.686	663	681.5	693
	1.687	660	684	694.5
	1.688	663.5	682	696.5
	1.689	661	685	697.5
	1.69	661	683	694.5
	1.691	660.5	683	697.5
	1.692	663	683	695.5
	1.693	659	683	695.5
	1.694	653	681.5	694
	1.695	658	682.5	696.5
	1.696	654	684	696
	1.697	646	683	697.5
	1.698	649.5	684	700
	1.699	649.5	682.5	693.5
	1.7	644	681	695.5
	1.701	644.5	685	697.5
	1.702	638	684	696.5
	1.703	640	683	696.5
	1.704	636.5	681	695.5
	1.705	636	683.5	697
	1.706	634	685	694.5
	1.707	630	685.5	696.5
	1.708	626	682.5	699
	1.709	624	681.5	698
	1.71	621	684.5	697
	1.711	616	679.5	697.5
	1.712	616	680	697.5
	1.713	609.5	683.5	698
	1.714	607	679.5	694.5
	1.715	604	681.5	695
	1.716	601.5	681.5	700
	1.717	598.5	682.5	694
	1.718	592	681	697.5
	1.719	588.5	679	697.5
	1.72	585	683	695
	1.721	584.5	680.5	695.5
	1.722	578	681	696.5
	1.723	572	678.5	694
	1.724	567.5	678	692
	1.725	565	680.5	694.5
	1.726	559	685.5	692.5
	1.727	556.5	684	690.5
	1.728	548.5	678.5	687
	1.729	549	682.5	689
	1.73	541.5	684	690
	1.731	533.5	681.5	690.5
	1.732	531	680	688
	1.733	522.5	684	689
	1.734	523	681	683.5
	1.735	518.5	679.5	688
	1.736	513.5	681.5	683.5
	1.737	508	682.5	683
	1.738	503.5	680.5	680.5
	1.739	499	682.5	676
	1.74	493.5	681.5	682
	1.741	491	684.5	680
	1.742	483	685	674
	1.743	479	679.5	676
	1.744	479.5	680	676
	1.745	470.5	680	672
	1.746	466.5	682.5	671
	1.747	463.5	682.5	670.5
	1.748	460.5	684.5	668.5
	1.749	458	687	665.5
	1.75	452	685	664.5
	1.751	451.5	680.5	661
	1.752	445.5	683	663
	1.753	443.5	681.5	661
	1.754	442.5	681.5	661
	1.755	436	682.5	656.5
	1.756	431	684	656
	1.757	433	680	651
	1.758	428.5	682	650.5
	1.759	425	680.5	644.5
	1.76	426	681	645
	1.761	420	684	643
	1.762	421.5	679.5	646
	1.763	417	683.5	637.5
	1.764	417	682.5	640
	1.765	411	680.5	637.5
	1.766	409.5	684	634
	1.767	409	685	633.5
	1.768	406.5	682.5	629.5
	1.769	404.5	683	632.5
	1.77	401.5	680.5	625.5
	1.771	401.5	681.5	624.5
	1.772	397	683	625
	1.773	399	683	621
	1.774	394.5	682.5	622.5
	1.775	395.5	683.5	621
	1.776	390	682.5	618.5
	1.777	393.5	680.5	617.5
	1.778	386.5	678	612.5
	1.779	385	681	613
	1.78	386	679.5	615
	1.781	384.5	684	612
	1.782	382	682.5	610
	1.783	382.5	678.5	607
	1.784	376.5	682	608.5
	1.785	377.5	684	607
	1.786	372.5	683	604
	1.787	370	684.5	605.5
	1.788	370	679	601
	1.789	367	678	599
	1.79	364.5	686	601
	1.791	366.5	683	598.5
	1.792	358.5	685	598.5
	1.793	360	682	597
	1.794	354	681.5	598.5
	1.795	350	685.5	597
	1.796	349	683.5	593
	1.797	350	685	593.5
	1.798	347.5	685	592.5
	1.799	345	685.5	592
	1.8	340.5	682	590
	1.801	338.5	687.5	586.5
	1.802	338	686.5	589
	1.803	332.5	690	586.5
	1.804	330	687	586.5
	1.805	328	692.5	581
	1.806	323	688	577.5
	1.807	326	689	576.5
	1.808	321	690.5	577
	1.809	318	689.5	576
	1.81	312	693	571.5
	1.811	307.5	690.5	570.5
	1.812	309.5	690.5	566
	1.813	305	692.5	567.5
	1.814	294	692	567
	1.815	296	694	561.5
	1.816	295	694	558
	1.817	290	695	554.5
	1.818	287.5	696	552.5
	1.819	284.5	693.5	550
	1.82	284	700	546.5
	1.821	283	695	542.5
	1.822	276	700.5	536
	1.823	270	695	532.5
	1.824	270	699	531
	1.825	264	698	528.5
	1.826	264	694	518.5
	1.827	261.5	700	513
	1.828	259	698	508.5
	1.829	256.5	696.5	503.5
	1.83	252	696.5	497.5
	1.831	253	697.5	494
	1.832	250.5	697.5	486.5
	1.833	247	702	477
	1.834	244.5	697.5	476.5
	1.835	244	699	472
	1.836	239	697.5	463
	1.837	241	701	457.5
	1.838	237.5	699.5	451
	1.839	232.5	699	444.5
	1.84	235	699.5	438.5
	1.841	234	698.5	431
	1.842	232	697	424
	1.843	229.5	702	417
	1.844	234	699	410.5
	1.845	230	699	403
	1.846	233.5	700.5	395.5
	1.847	235	704.5	388.5
	1.848	232.5	699.5	384.5
	1.849	234	701.5	377.5
	1.85	232.5	699.5	369.5
	1.851	235	699	362.5
	1.852	237	700	357
	1.853	237	697	353.5
	1.854	239.5	697	351
	1.855	245.5	699	345
	1.856	242.5	701	340.5
	1.857	245.5	698.5	333
	1.858	247.5	699.5	329
	1.859	251	703	324.5
	1.86	249	700.5	321.5
	1.861	250.5	700	318.5
	1.862	254.5	700.5	316
	1.863	254.5	699	311
	1.864	256	698.5	311.5
	1.865	259.5	700	307.5
	1.866	262.5	696.5	308.5
	1.867	263.5	699.5	303
	1.868	266	698.5	302.5
	1.869	266	698.5	300
	1.87	266.5	699.5	300
	1.871	271.5	699	299
	1.872	267.5	700	297
	1.873	273.5	697.5	300
	1.874	273	702	296
	1.875	275	701	297.5
	1.876	273	699	295.5
	1.877	274.5	696.5	300
	1.878	277.5	699.5	296.5
	1.879	279	700	300
	1.88	280	699	300
	1.881	278	700	300.5
	1.882	280.5	697	297.5
	1.883	282	698.5	298.5
	1.884	280	696.5	305
	1.885	283.5	699	300.5
	1.886	284.5	697.5	306.5
	1.887	283.5	699	303
	1.888	284	696.5	304.5
	1.889	284.5	698	306.5
	1.89	284	697	305.5
	1.891	286	696	306
	1.892	284	698	313
	1.893	287	694.5	304
	1.894	287	696.5	308.5
	1.895	288.5	698	306
	1.896	288	696.5	305
	1.897	288	695.5	314.5
	1.898	289.5	694	311
	1.899	287	697.5	316
	1.9	289	695.5	315.5
	1.901	288.5	692	315.5
	1.902	287.5	692.5	315
	1.903	290.5	694	317.5
	1.904	292	698.5	318
	1.905	292	694.5	318.5
	1.906	293.5	692.5	316
	1.907	294.5	697	315
	1.908	297	695	319
	1.909	294.5	695.5	316.5
	1.91	297	691.5	315.5
	1.911	298.5	694.5	315.5
	1.912	293.5	693	314.5
	1.913	297	695.5	312
	1.914	299.5	692.5	311
	1.915	295	697.5	310.5
	1.916	300.5	690.5	311
	1.917	301.5	690.5	308.5
	1.918	303	696.5	307
	1.919	300.5	690.5	305.5
	1.92	300.5	692	305
	1.921	301.5	692.5	302
	1.922	302.5	690	299.5
	1.923	304	690.5	295.5
	1.924	306	690.5	292.5
	1.925	301.5	693.5	291.5
	1.926	304	690	290
	1.927	301	692	287
	1.928	298.5	690.5	285
	1.929	303.5	690.5	280
	1.93	304.5	685	279
	1.931	310.5	690.5	274
	1.932	311.5	685	271
	1.933	314.5	688.5	269
	1.934	315.5	690.5	266
	1.935	314.5	689.5	262
	1.936	321.5	684.5	260
	1.937	319	690.5	259.5
	1.938	321.5	685	254.5
	1.939	322	685.5	252
	1.94	322.5	683	247.5
	1.941	326.5	682	246
	1.942	331	681	244.5
	1.943	333	683.5	241.5
	1.944	336.5	681.5	242.5
	1.945	340	682.5	232
	1.946	341	680	235
	1.947	352	678.5	233.5
	1.948	349.5	681	228
	1.949	355.5	678.5	228
	1.95	357.5	681	229.5
	1.951	358.5	676	223
	1.952	362.5	675.5	226.5
	1.953	362.5	676	224
	1.954	372	676	221.5
	1.955	376.5	677	220.5
	1.956	383	674	221
	1.957	385	673.5	221
	1.958	389.5	672	219
	1.959	396.5	671.5	220
	1.96	401	670	214
	1.961	403.5	672.5	214
	1.962	409.5	670.5	220.5
	1.963	414	662	217.5
	1.964	420	668	220.5
	1.965	429	664	221
	1.966	440.5	665.5	221
	1.967	441.5	662.5	226.5
	1.968	452	660	226.5
	1.969	460.5	660	233.5
	1.97	461	656	232.5
	1.971	474	654.5	235
	1.972	485.5	655	237.5
	1.973	492.5	651.5	241
	1.974	500.5	652.5	245
	1.975	509	649.5	246
	1.976	519.5	646	250.5
	1.977	526.5	650	259
	1.978	536.5	644	260
	1.979	545.5	646	265
	1.98	551.5	645.5	268
	1.981	563.5	642.5	271.5
	1.982	571	641.5	275
	1.983	580.5	636.5	280.5
	1.984	585	636	287
	1.985	594	634.5	287
	1.986	604.5	635	294
	1.987	615.5	631	296.5
	1.988	622	630	303
	1.989	633.5	631	307
	1.99	640.5	624.5	310.5
	1.991	648.5	623.5	314
	1.992	653.5	624.5	321.5
	1.993	662	622	322
[truncated: 6,006 more rows]

## Sheet: F
DataTypeVer2.0	Time	Fz	Fz	Fz
NumberOfData		7000	7000	7000
PreTriggerData		0	0	0
SamplingTime[ms]		1	1	1
DataLabel		D1:CMJ	D5:CMJ	D6:CMJ
DataUnit	sec	N	N	N
	0	613	615.5	615.5
	0.001	617	615.5	614.5
	0.002	615.5	615.5	615.5
	0.003	616	613.5	613.5
	0.004	612.5	611.5	615.5
	0.005	614.5	616	614.5
	0.006	615	611.5	615.5
	0.007	614.5	615.5	616.5
	0.008	615	615.5	616.5
	0.009	614.5	615	611
	0.01	613.5	617	615
	0.011	612.5	614	616
	0.012	613.5	616.5	616.5
	0.013	614.5	615.5	616.5
	0.014	611	615.5	614
	0.015	616	616	615.5
	0.016	614	614.5	615
	0.017	614	615.5	614
	0.018	615.5	615.5	614
	0.019	615.5	615.5	614
	0.02	613.5	616.5	614
	0.021	615	614.5	615
	0.022	613.5	615.5	614
	0.023	612.5	614.5	617
	0.024	611	614.5	615.5
	0.025	615.5	615.5	615
	0.026	615.5	617	615
	0.027	612	616.5	614.5
	0.028	614	614	617
	0.029	614.5	613.5	614
	0.03	612.5	613	613
	0.031	614.5	616	612
	0.032	613.5	615	612
	0.033	611	615.5	614.5
	0.034	609.5	616.5	618
	0.035	615.5	612.5	614
	0.036	613.5	612	613.5
	0.037	611.5	615.5	612.5
	0.038	614	616	615
	0.039	608.5	615.5	614
	0.04	613	612.5	615.5
	0.041	612	617.5	609
	0.042	612.5	617	614.5
	0.043	614.5	615	611
	0.044	614.5	616.5	612.5
	0.045	613.5	613	613.5
	0.046	616	615	611
	0.047	613	613	612
	0.048	611.5	615.5	611
	0.049	611	614	612
	0.05	615.5	617.5	612
	0.051	611.5	612	613
	0.052	617	615	613.5
	0.053	616.5	611	612
	0.054	612.5	608.5	613.5
	0.055	612.5	614	611
	0.056	614	612	610.5
	0.057	613	609.5	614.5
	0.058	618	615.5	616
	0.059	613.5	612	613.5
	0.06	614.5	613.5	609.5
	0.061	614.5	614.5	612
	0.062	615.5	611	613
	0.063	615.5	613.5	611.5
	0.064	614	615.5	609
	0.065	613	613.5	611
	0.066	612.5	613.5	612
	0.067	615.5	613.5	613.5
	0.068	616	612	611
	0.069	612.5	615	607.5
	0.07	609.5	612.5	613.5
	0.071	615	614	611.5
	0.072	619	610.5	608.5
	0.073	614.5	615.5	611
	0.074	615.5	612	610.5
	0.075	617	615.5	611.5
	0.076	616	615.5	615
	0.077	611.5	611	611
	0.078	611.5	609	612
	0.079	614.5	613	610
	0.08	615.5	613.5	617
	0.081	614.5	612.5	614
	0.082	615.5	615.5	611
	0.083	615.5	613	611
	0.084	614.5	610	611
	0.085	617	612.5	614.5
	0.086	614	613	609
	0.087	612	614.5	612
	0.088	615.5	613	614
	0.089	615.5	612.5	614
	0.09	610.5	609	612.5
	0.091	617	612	613.5
	0.092	614.5	613.5	609
	0.093	615	613	611.5
	0.094	612.5	610.5	613.5
	0.095	612	613.5	614
	0.096	615.5	615.5	612.5
	0.097	612.5	616	613.5
	0.098	613.5	612	612.5
	0.099	614.5	614	611
	0.1	615	614	610.5
	0.101	615.5	614.5	614
	0.102	614.5	616	613.5
	0.103	615.5	617	615
	0.104	615.5	613.5	611.5
	0.105	615	611	610.5
	0.106	613.5	615.5	612
	0.107	611.5	619	610
	0.108	613.5	614	611
	0.109	615.5	618.5	612
	0.11	613.5	613.5	613
	0.111	612.5	614.5	609.5
	0.112	613.5	616	613
	0.113	613.5	616	611.5
	0.114	614	614.5	613.5
	0.115	612	611	617
	0.116	615	613	613.5
	0.117	615.5	615.5	611
	0.118	615.5	615	612
	0.119	615	615.5	612
	0.12	615.5	614.5	614
	0.121	612.5	615	612
	0.122	611.5	615	608.5
	0.123	612	615.5	612
	0.124	614	611.5	614
	0.125	615	614	617
	0.126	615.5	612.5	612.5
	0.127	611	611.5	615.5
	0.128	614.5	614	616
	0.129	615	612	611
	0.13	614.5	614	615.5
	0.131	617	611.5	613.5
	0.132	611.5	615	613.5
	0.133	612.5	615.5	611
	0.134	616	615	614.5
	0.135	613.5	615	614
	0.136	612.5	611.5	615
	0.137	612	611.5	612
	0.138	615	613.5	611.5
	0.139	614	609.5	612.5
	0.14	612	612	615
	0.141	612	609.5	614.5
	0.142	614	613	611.5
	0.143	615	611	611.5
	0.144	613	615	608.5
	0.145	611.5	614.5	611.5
	0.146	617.5	613.5	613.5
	0.147	615.5	614	609.5
	0.148	616	611.5	613.5
	0.149	613	613.5	614
	0.15	617	611.5	609
	0.151	615.5	612.5	612
	0.152	613.5	608.5	612
	0.153	616	610.5	612
	0.154	614	611.5	613.5
	0.155	615.5	611	614
	0.156	611.5	610.5	614.5
	0.157	617	608.5	614
	0.158	616	610	614
	0.159	616	609	611.5
	0.16	615.5	611	615
	0.161	613	609.5	613
	0.162	614.5	610.5	613
	0.163	615.5	609.5	613
	0.164	615.5	608.5	615
	0.165	612	611.5	616.5
	0.166	612.5	610.5	614.5
	0.167	614	610.5	610.5
	0.168	615	610	613.5
	0.169	613	608.5	612
	0.17	610.5	610.5	613.5
	0.171	616	609	613
	0.172	612.5	611	614
	0.173	613	609	612.5
	0.174	613.5	610	618
	0.175	615	609.5	613.5
	0.176	614.5	608.5	612
	0.177	612	613.5	615
	0.178	612	612	613.5
	0.179	610.5	614.5	614.5
	0.18	612	611	613.5
	0.181	613	611	617
	0.182	614	607.5	612
	0.183	610.5	608.5	612
	0.184	612	612	613.5
	0.185	612.5	608	615.5
	0.186	614	608.5	615.5
	0.187	611	606.5	611
	0.188	610	610.5	610.5
	0.189	615	610	614
	0.19	610.5	608.5	614.5
	0.191	609.5	611.5	616.5
	0.192	612.5	611.5	611.5
	0.193	612.5	605.5	617
	0.194	612.5	611	615
	0.195	610	608.5	615
	0.196	612	607.5	613.5
	0.197	611.5	608	617.5
	0.198	611	608	615.5
	0.199	611	608.5	615
	0.2	611	611.5	619
	0.201	613.5	608.5	616.5
	0.202	612.5	608.5	615
	0.203	614	610	614.5
	0.204	614	610	616
	0.205	609	610.5	613.5
	0.206	612.5	609	611.5
	0.207	611	607	613
	0.208	608	609	615
	0.209	613	608	615.5
	0.21	607.5	612	615.5
	0.211	608	609.5	614
	0.212	611	611.5	616.5
	0.213	613	611	615.5
	0.214	607.5	613.5	614.5
	0.215	610	608.5	614
	0.216	608	608.5	613.5
	0.217	606.5	608.5	615.5
	0.218	609.5	612	613.5
	0.219	609	612	613.5
	0.22	608	610.5	614
	0.221	610	612	611.5
	0.222	615.5	610.5	616
	0.223	608.5	611.5	616
	0.224	606.5	610	612
	0.225	608	612.5	612.5
	0.226	609.5	609	615.5
	0.227	612.5	609.5	613
	0.228	610.5	610.5	608.5
	0.229	609.5	609	614
	0.23	612	610	615
	0.231	609.5	609.5	614.5
	0.232	611	609	614.5
	0.233	613.5	609	615
	0.234	612	613	615.5
	0.235	611.5	610.5	614.5
	0.236	609	608	611
	0.237	611	610.5	609
	0.238	609.5	610	615
	0.239	612	613	612
	0.24	610.5	613.5	618.5
	0.241	613.5	614	612
	0.242	615.5	608.5	612
	0.243	614	613	612
	0.244	611.5	612.5	613.5
	0.245	615.5	615.5	610
	0.246	614.5	611.5	612
	0.247	614.5	611	611.5
	0.248	614.5	615.5	612
	0.249	614.5	612	612
	0.25	614.5	614	611
	0.251	616	613.5	610.5
	0.252	614.5	609.5	612
	0.253	612	614	611
	0.254	615	612.5	615
	0.255	613.5	614	613
	0.256	611.5	613.5	613
	0.257	615.5	609.5	612
	0.258	616	612.5	614.5
	0.259	614	614.5	610.5
	0.26	616	613	612
	0.261	618.5	611	611
	0.262	616	614	612.5
	0.263	614	616	615
	0.264	614.5	612	614
	0.265	615	613.5	612
	0.266	613.5	615.5	615.5
	0.267	614.5	613.5	612
	0.268	615.5	615	615
	0.269	612.5	612.5	616
	0.27	613.5	614.5	614
	0.271	613.5	612	617
	0.272	615	616.5	612
	0.273	613	617	615
	0.274	615.5	620	615
	0.275	613.5	617.5	617.5
	0.276	612	616	611.5
	0.277	615.5	616	611.5
	0.278	613.5	614.5	614
	0.279	612	615.5	610.5
	0.28	615.5	617.5	613.5
	0.281	611	614.5	615
	0.282	615	615.5	619.5
	0.283	613	613.5	616
	0.284	613	615	615.5
	0.285	613	614	614.5
	0.286	611	618.5	613
	0.287	615	615.5	613
	0.288	612	618.5	616
	0.289	614.5	615.5	617.5
	0.29	614	619.5	613.5
	0.291	611.5	619	616.5
	0.292	614.5	615	611
	0.293	612	615.5	615
	0.294	611.5	618	614
	0.295	612	615.5	616
	0.296	611.5	618	616
	0.297	614.5	617	615.5
	0.298	615.5	617	616
	0.299	615.5	619.5	615
	0.3	615	616.5	616
	0.301	616	621	616
	0.302	614.5	616.5	615.5
	0.303	614	616.5	617
	0.304	611	616.5	615
	0.305	614	618	611.5
	0.306	614.5	618	614.5
	0.307	615.5	617.5	614
	0.308	614.5	615.5	618
	0.309	615.5	617.5	615.5
	0.31	615.5	621	620.5
	0.311	612.5	615.5	616.5
	0.312	611.5	617	613
	0.313	613	616.5	614
	0.314	618.5	618	615
	0.315	613.5	618	617
	0.316	614	617.5	615.5
	0.317	612.5	615.5	616
	0.318	616.5	615.5	616.5
	0.319	614.5	616.5	619.5
	0.32	614.5	614.5	617
	0.321	614.5	615.5	615
	0.322	614	613	618.5
	0.323	616	615.5	618
	0.324	611	615.5	615.5
	0.325	613.5	615.5	615
	0.326	615.5	615.5	615.5
	0.327	611	615	613.5
	0.328	615.5	611.5	615.5
	0.329	614	616	615.5
	0.33	617	615.5	619.5
	0.331	617.5	614.5	619.5
	0.332	616	616	615.5
	0.333	616	614.5	615.5
	0.334	616	615	615.5
	0.335	614	614.5	617.5
	0.336	615	614.5	617
	0.337	614	609.5	615
	0.338	614.5	610	617
	0.339	614	613.5	617.5
	0.34	615	612	616
	0.341	615.5	610.5	620.5
	0.342	614.5	611.5	615.5
	0.343	612.5	611.5	613.5
	0.344	618.5	610.5	614.5
	0.345	615.5	612	615.5
	0.346	613.5	611	616.5
	0.347	615.5	611	615.5
	0.348	615.5	611	616.5
	0.349	615.5	611	615.5
	0.35	615.5	611.5	613.5
	0.351	612.5	612	616.5
	0.352	615.5	613.5	614
	0.353	612.5	612	614.5
	0.354	613.5	608.5	611.5
	0.355	616	608.5	614.5
	0.356	614.5	611	615
	0.357	613	611	614
	0.358	614.5	608.5	618
	0.359	616	608.5	615
	0.36	614.5	609.5	615
	0.361	614.5	607.5	619.5
	0.362	612.5	605.5	613.5
	0.363	615.5	608.5	611.5
	0.364	612.5	606.5	612.5
	0.365	613.5	608.5	612.5
	0.366	612.5	604	615
	0.367	609.5	607.5	612
	0.368	616	608	612
	0.369	610.5	607.5	613.5
	0.37	614	608	612
	0.371	611.5	608	613
	0.372	614.5	606.5	611
	0.373	610.5	607.5	610.5
	0.374	614	608.5	615
	0.375	613	610	611.5
	0.376	615.5	608	612
	0.377	613.5	606.5	611.5
	0.378	613.5	607.5	612.5
	0.379	616	608.5	615.5
	0.38	611	608.5	611
	0.381	611.5	605	611.5
	0.382	613	607.5	613
	0.383	614.5	607.5	611
	0.384	615	611	615
	0.385	611	605.5	611.5
	0.386	608.5	605.5	610.5
	0.387	608	606.5	608.5
	0.388	613.5	611.5	615.5
	0.389	613	608.5	613.5
	0.39	612	609	610.5
	0.391	612.5	610	611
	0.392	609.5	609.5	610.5
	0.393	610	608	613
	0.394	611.5	605	608.5
	0.395	610.5	608.5	611.5
	0.396	610	609.5	611
	0.397	610.5	605.5	613
	0.398	610	609.5	612
	0.399	609.5	606	612.5
	0.4	612.5	609	609
	0.401	608.5	608.5	608.5
	0.402	609	611	612
	0.403	612.5	608.5	609
	0.404	613	606	608
	0.405	612.5	611	612
	0.406	610.5	609	608.5
	0.407	610.5	612	611.5
	0.408	612.5	608.5	615
	0.409	612.5	608.5	608
	0.41	614.5	608	611
	0.411	611.5	608.5	606.5
	0.412	612	607	609.5
	0.413	612.5	608.5	611
	0.414	610.5	609.5	609
	0.415	609.5	611	610
	0.416	608	608	611
	0.417	611.5	614	614
	0.418	612	608.5	611.5
	0.419	608.5	608.5	608.5
	0.42	613	612	609
	0.421	611	607	609.5
	0.422	611.5	613.5	610
	0.423	613	609.5	611.5
	0.424	612	612	611
	0.425	612.5	615	613.5
	0.426	614.5	613.5	608.5
	0.427	611.5	613.5	612
	0.428	612	611.5	611
	0.429	613	612.5	608.5
	0.43	611.5	615	611
	0.431	613.5	613.5	612.5
	0.432	610	612.5	612
	0.433	613.5	613	609.5
	0.434	613	611	610.5
	0.435	614.5	614	611.5
	0.436	613.5	612.5	612
	0.437	611.5	615	613
	0.438	609.5	612	610
	0.439	614	614.5	612
	0.44	615.5	614.5	609.5
	0.441	611	615	610.5
	0.442	612.5	613	609.5
	0.443	613	614	614
	0.444	614.5	612	615.5
	0.445	608.5	613.5	611
	0.446	613	613	614
	0.447	612	614.5	613.5
	0.448	612.5	615	615
	0.449	612.5	614	609
	0.45	613	616	610.5
	0.451	613	614.5	611.5
	0.452	612.5	611.5	608.5
	0.453	613.5	614	616
	0.454	610.5	614	611.5
	0.455	611.5	612	617
	0.456	617	613.5	614
	0.457	613.5	614	609
	0.458	615.5	614.5	615.5
	0.459	613.5	614	615
	0.46	615.5	613	609.5
	0.461	615.5	614.5	615
	0.462	611	617	615
	0.463	614.5	612	614
	0.464	612	616.5	613.5
	0.465	613.5	613.5	611.5
	0.466	612	615.5	612.5
	0.467	613.5	616	612
	0.468	615.5	615.5	609
	0.469	614.5	614.5	612.5
	0.47	613	615.5	612
	0.471	613	615.5	613
	0.472	611.5	614	611.5
	0.473	616	617.5	613
	0.474	614.5	615.5	612
	0.475	615	613.5	616
	0.476	610.5	614.5	614
	0.477	612	613.5	611
	0.478	614.5	614	615
	0.479	617.5	616	616
	0.48	611	617	614.5
	0.481	611.5	614.5	613
	0.482	616	617	616.5
	0.483	614.5	613.5	614
	0.484	612.5	616	612
	0.485	612.5	617	611
	0.486	615.5	615.5	615.5
	0.487	616.5	614	613
	0.488	611.5	615	613.5
	0.489	611	614	615
	0.49	612	616	615.5
	0.491	614	612	613
	0.492	614.5	616.5	612
	0.493	616.5	613.5	614.5
	0.494	614	615	613.5
	0.495	611.5	614	614.5
	0.496	613	615.5	614.5
	0.497	614.5	613.5	614.5
	0.498	611.5	613.5	615
	0.499	613.5	617	616.5
	0.5	613	613.5	617.5
	0.501	612.5	615.5	611.5
	0.502	611.5	612	617.5
	0.503	615.5	615.5	617
	0.504	610.5	613.5	612.5
	0.505	613.5	612	614
	0.506	612	613.5	614.5
	0.507	610	612.5	614
	0.508	612	612.5	616
	0.509	610.5	612	615.5
	0.51	614.5	611.5	616
	0.511	611.5	614	617.5
	0.512	614.5	613.5	615.5
	0.513	614	615.5	617
	0.514	613	614	615
	0.515	610	614.5	616
	0.516	612	613.5	616
	0.517	615.5	611.5	614.5
	0.518	613.5	611.5	618.5
	0.519	615.5	609.5	617.5
	0.52	614	615	616.5
	0.521	613.5	613	615.5
	0.522	612.5	613.5	615.5
	0.523	614.5	613	617
	0.524	613.5	610.5	615.5
	0.525	613.5	612	615.5
	0.526	615	613	615
	0.527	613.5	613.5	614
	0.528	613	611	619
	0.529	618.5	607.5	614
	0.53	616	612.5	615
	0.531	610	609.5	617
	0.532	611	609	614
	0.533	612.5	608.5	612
	0.534	610.5	610.5	616.5
	0.535	616	613.5	614.5
	0.536	612.5	610	614.5
	0.537	612.5	613.5	616
	0.538	608	608	616.5
	0.539	613.5	610.5	616
	0.54	612.5	610.5	616.5
	0.541	612.5	609	617
	0.542	614	608.5	612
	0.543	610.5	609	617
	0.544	613	610.5	616
	0.545	613.5	608.5	615.5
	0.546	617	611	617
	0.547	615.5	610.5	617
	0.548	613	609.5	611.5
	0.549	614	613	612
	0.55	612	611.5	615
	0.551	615.5	612	613.5
	0.552	613	613	616
	0.553	611.5	610	615.5
	0.554	614	608.5	614.5
	0.555	615.5	612	612
	0.556	611.5	612.5	614
	0.557	613.5	612.5	611.5
	0.558	611.5	608.5	615.5
	0.559	614	613	613.5
	0.56	613	611.5	616.5
	0.561	616	613.5	614.5
	0.562	613.5	615	613.5
	0.563	612	608.5	613.5
	0.564	615	610	612.5
	0.565	614.5	607.5	614
	0.566	614.5	610.5	616.5
	0.567	614	609	612
	0.568	616	611.5	615.5
	0.569	615.5	610	615.5
	0.57	615.5	611.5	615
	0.571	616	611	612
	0.572	613	614	616
	0.573	612	611.5	612
	0.574	613.5	609	615
	0.575	615	609.5	612
	0.576	613.5	608.5	612
	0.577	614	615.5	614
	0.578	617	609.5	610.5
	0.579	610.5	613.5	612
	0.58	612	615	613.5
	0.581	611.5	613.5	615.5
	0.582	617	611	613.5
	0.583	614.5	612.5	615.5
	0.584	615.5	612	615
	0.585	613.5	613.5	613.5
	0.586	615	615.5	611
	0.587	615.5	612.5	615
	0.588	614	612	615.5
	0.589	613.5	613.5	614
	0.59	614	611.5	611.5
	0.591	616	614	616.5
	0.592	613	611	612
	0.593	615	614.5	613.5
	0.594	616	614	612
	0.595	617.5	612	611.5
	0.596	617	613	612
	0.597	610	612.5	613
	0.598	613.5	613.5	613
	0.599	613.5	612	611
	0.6	616	615	614
	0.601	615	613	614
	0.602	613.5	610	613.5
	0.603	614	618	610.5
	0.604	614	615	614
	0.605	608.5	614	616
	0.606	613.5	614.5	611
	0.607	616	615.5	615.5
	0.608	614	611	612.5
	0.609	610.5	611.5	615.5
	0.61	616.5	613.5	615.5
	0.611	613	613	614
	0.612	613.5	611.5	613.5
	0.613	615.5	615	615
	0.614	611.5	611.5	610.5
	0.615	615.5	613.5	611.5
	0.616	617	614.5	613
	0.617	611.5	614	610.5
	0.618	615.5	614	610.5
	0.619	610.5	613	612
	0.62	614.5	615	610.5
	0.621	613	610	610.5
	0.622	613.5	611	609.5
	0.623	613.5	615.5	612
	0.624	611	614.5	612
	0.625	613.5	612	607.5
	0.626	613.5	615	613.5
	0.627	614.5	612.5	614
	0.628	614.5	616	610
	0.629	613	613.5	616
	0.63	613.5	616.5	615
	0.631	613.5	609.5	613.5
	0.632	615.5	613	611.5
	0.633	613.5	611	613.5
	0.634	614.5	609	611.5
	0.635	612.5	608.5	611.5
	0.636	615.5	613.5	609
	0.637	612	615.5	609
	0.638	617	615	612
	0.639	613.5	609.5	616
	0.64	613.5	613	611
	0.641	615.5	612	611
	0.642	614	611.5	612.5
	0.643	613.5	613	614.5
	0.644	615.5	612	613.5
	0.645	614.5	613.5	610
	0.646	616	611	611.5
	0.647	616	610.5	610
	0.648	615	615	615.5
	0.649	611.5	615	613
	0.65	616	611	617
	0.651	614	614	613
	0.652	611	611.5	613.5
	0.653	614	613	612
	0.654	615.5	611.5	612
	0.655	613.5	611.5	612.5
	0.656	616	612	610.5
	0.657	611.5	612	615
	0.658	615	610.5	615.5
	0.659	613	615.5	611.5
	0.66	612.5	614.5	615.5
	0.661	614	614.5	609.5
	0.662	615.5	612	611.5
	0.663	616	615.5	613.5
	0.664	616.5	613	613.5
	0.665	609	612.5	614.5
	0.666	613	611.5	615
	0.667	615.5	617	616.5
	0.668	615.5	611.5	612
	0.669	614	612	615.5
	0.67	616	615.5	615.5
	0.671	615.5	607.5	611
	0.672	615.5	614	615
	0.673	614.5	613.5	615.5
	0.674	615	613	617
	0.675	614.5	612	615.5
	0.676	615	615	613.5
	0.677	615.5	615.5	615
	0.678	615	613	615.5
	0.679	612	612	613
	0.68	615.5	610	618.5
	0.681	615	612	611.5
	0.682	614.5	611.5	615.5
	0.683	617.5	613	616.5
	0.684	613	610.5	616.5
	0.685	615.5	614	615
	0.686	611.5	610.5	614.5
	0.687	616	613.5	612.5
	0.688	615.5	614	615.5
	0.689	610	611.5	617
	0.69	613.5	612	615.5
	0.691	612.5	612	618.5
	0.692	612.5	612.5	614
	0.693	609	611	615.5
	0.694	613	609.5	615
	0.695	612.5	609	612
	0.696	612.5	611	616.5
	0.697	612.5	609	616.5
	0.698	617	611.5	616.5
	0.699	613	607.5	615.5
	0.7	613.5	609.5	613.5
	0.701	610.5	608.5	613
	0.702	611	612.5	616
	0.703	613	611.5	616
	0.704	611.5	609	617.5
	0.705	610	612	615.5
	0.706	615	609.5	613.5
	0.707	610.5	612.5	617
	0.708	615	612.5	615
	0.709	612.5	612	617.5
	0.71	612.5	612	615
	0.711	609.5	610	614.5
	0.712	614	612	610.5
	0.713	611.5	607	613.5
	0.714	611.5	610.5	614.5
	0.715	612.5	611.5	616.5
	0.716	612	608.5	616
	0.717	612	613	612
	0.718	610.5	609.5	615.5
	0.719	615	612	616.5
	0.72	611.5	610	612
	0.721	610.5	611.5	615.5
	0.722	613.5	613.5	613.5
	0.723	609.5	610	614.5
	0.724	614	609	615.5
	0.725	613.5	611	613.5
	0.726	614.5	611.5	613
	0.727	613.5	609	614
	0.728	609.5	612	614
	0.729	613.5	614	616.5
	0.73	613.5	610.5	613.5
	0.731	612.5	612	616.5
	0.732	608.5	612	611
	0.733	609	611	615
	0.734	612	612	615
	0.735	611.5	612	616.5
	0.736	608.5	616	614
	0.737	611.5	616	616
	0.738	610.5	611.5	615.5
	0.739	610.5	612	617
	0.74	610.5	609.5	616.5
	0.741	611.5	612	613.5
	0.742	611	615.5	616
	0.743	607	609	616
	0.744	609	614	615.5
	0.745	608.5	611	614.5
	0.746	610.5	616.5	615
	0.747	611	612	614.5
	0.748	612.5	615	616.5
	0.749	610	615	617
	0.75	609.5	611.5	611
	0.751	613.5	608.5	614
	0.752	610.5	615.5	616
	0.753	611.5	613.5	615.5
	0.754	608.5	615	618.5
	0.755	611	612	614
	0.756	611.5	615.5	615.5
	0.757	609.5	615	616
	0.758	608.5	611	615
	0.759	610.5	615.5	612.5
	0.76	609	615	614
	0.761	613	615	615
	0.762	613	610.5	620.5
	0.763	611.5	612	614
	0.764	614.5	615	613.5
	0.765	611	613	615.5
	0.766	610	612	614.5
	0.767	611.5	616.5	612
	0.768	611.5	612.5	616.5
	0.769	611.5	611.5	615
	0.77	608.5	612	616
	0.771	614.5	614.5	616.5
	0.772	609.5	612	616
	0.773	613	613.5	615.5
	0.774	611	614.5	614
	0.775	615	608.5	612
	0.776	614	614	614
	0.777	615.5	609	613.5
	0.778	611	611.5	616
	0.779	615	613.5	615.5
	0.78	616	609	614
	0.781	613.5	609	613
	0.782	615.5	610.5	618.5
	0.783	609	615.5	614
	0.784	612.5	613	613.5
	0.785	613	614	615
	0.786	614.5	614.5	613.5
	0.787	616	614	613.5
	0.788	614	612.5	619
	0.789	611	615.5	612
	0.79	611	613	612.5
	0.791	612	611.5	610
	0.792	613.5	611.5	609.5
	0.793	610.5	612	613.5
	0.794	613	613.5	612
	0.795	611.5	612	615
	0.796	614.5	615.5	612
	0.797	615.5	612	617.5
	0.798	613.5	615.5	612
	0.799	611.5	615.5	613
	0.8	614	618	612
	0.801	614	614.5	611
	0.802	612	614.5	614
	0.803	614.5	616	612
	0.804	616	615	615.5
	0.805	616	617	613
	0.806	615.5	613.5	611
	0.807	615.5	613	612
	0.808	617.5	617	615.5
	0.809	614.5	614	613
	0.81	615.5	616	612
	0.811	611.5	615.5	615
	0.812	614.5	614.5	612
	0.813	615.5	618.5	611.5
	0.814	612	620	614
	0.815	614	617	612
	0.816	614.5	616	615.5
	0.817	613.5	618	615.5
	0.818	615.5	616.5	616
	0.819	613.5	616.5	614
	0.82	615.5	617	615.5
	0.821	612.5	620.5	616
	0.822	611.5	616.5	616.5
	0.823	613.5	616	615
	0.824	611	615.5	611.5
	0.825	615.5	616.5	615.5
	0.826	612.5	616	613.5
	0.827	617	615.5	615
	0.828	615.5	615	617.5
	0.829	612	615	614.5
	0.83	611	616	615
	0.831	610.5	615	614
	0.832	615.5	616.5	612.5
	0.833	609.5	614.5	616
	0.834	616	614.5	614
	0.835	616	619.5	616.5
	0.836	614.5	615	612
	0.837	609.5	618.5	612
	0.838	614.5	615	613
	0.839	614.5	615.5	611
	0.84	615.5	613.5	617.5
	0.841	610	612	612
	0.842	612	615	614
	0.843	613	615	613.5
	0.844	616	611.5	614.5
	0.845	611.5	615.5	613.5
	0.846	613.5	611.5	616
	0.847	615.5	614	615
	0.848	614	610.5	614
	0.849	610	615	615
	0.85	617.5	612.5	614
	0.851	614.5	614.5	619
	0.852	613	611	614.5
	0.853	610.5	610	613.5
	0.854	615.5	613.5	611.5
	0.855	611.5	612	614.5
	0.856	612	613.5	615.5
	0.857	614.5	613	617.5
	0.858	612.5	605.5	615
	0.859	612	611.5	614
	0.86	610.5	612	613
	0.861	611	609	615.5
	0.862	612.5	614.5	616.5
	0.863	611	609	612
	0.864	611.5	611.5	617.5
	0.865	613	610.5	615
	0.866	610	611	616.5
	0.867	611.5	611.5	612
	0.868	612	612	616
	0.869	612	611	613.5
	0.87	609.5	607.5	614.5
	0.871	612.5	607.5	615.5
	0.872	611.5	607.5	615.5
	0.873	611	612	615.5
	0.874	610.5	607.5	616.5
	0.875	613	609	615.5
	0.876	612	608	616
	0.877	613.5	609	615
	0.878	607	607.5	616
	0.879	613.5	607.5	614.5
	0.88	608	611	612.5
	0.881	605.5	610	615.5
	0.882	612	610.5	611.5
	0.883	611	609	616
	0.884	614	608	615.5
	0.885	609.5	606.5	615
	0.886	610.5	611	615
	0.887	606	611.5	616.5
	0.888	610	607	612
	0.889	611.5	608	611.5
	0.89	611	612	616.5
	0.891	613	605.5	616.5
	0.892	611.5	609	615
	0.893	608	608.5	617
	0.894	613	607.5	613.5
	0.895	614	612	615
	0.896	611.5	610	613
	0.897	607	609	611.5
	0.898	609.5	608	614
	0.899	611	611	612
	0.9	611.5	611	618
	0.901	609	610	609
	0.902	612	607.5	613
	0.903	614.5	612	611
	0.904	609.5	608.5	614.5
	0.905	609.5	612	615.5
	0.906	611	608.5	613.5
	0.907	609.5	610.5	611
	0.908	610.5	608	612
	0.909	611	608.5	615
	0.91	615.5	615	611
	0.911	613.5	610	609
	0.912	611.5	611	615.5
	0.913	613.5	612	610
	0.914	612.5	610.5	611.5
	0.915	610.5	609	612.5
	0.916	612.5	610.5	608.5
	0.917	616	611.5	610.5
	0.918	611.5	611.5	612.5
	0.919	612.5	609.5	614
	0.92	613	613.5	612
	0.921	608.5	612	611
	0.922	615	612	612
	0.923	611.5	615.5	609
	0.924	610.5	614.5	608.5
	0.925	612.5	614.5	608.5
	0.926	613.5	613.5	609
	0.927	615.5	610	611.5
	0.928	612	611	611.5
	0.929	613	612.5	610.5
	0.93	614	610.5	608.5
	0.931	618.5	612	611.5
	0.932	618	611.5	608.5
	0.933	615	613.5	614.5
	0.934	613.5	611	608.5
	0.935	612	609	609.5
	0.936	614.5	610.5	608.5
	0.937	611.5	612	612
	0.938	613.5	612.5	610.5
	0.939	614	610	612
	0.94	614	608.5	612
	0.941	612.5	614	611
	0.942	614	610	611.5
	0.943	612.5	613	611
	0.944	614.5	613.5	613.5
	0.945	614.5	615	611
	0.946	615.5	611	612
	0.947	614.5	612	613.5
	0.948	613	612	611.5
	0.949	613.5	614.5	613.5
	0.95	615.5	610.5	610.5
	0.951	615.5	614	609.5
	0.952	619	611.5	612
	0.953	613	613.5	609.5
	0.954	614.5	613.5	613
	0.955	618	611	608.5
	0.956	616	611.5	611.5
	0.957	612	612	610
	0.958	614.5	616.5	610.5
	0.959	617.5	611.5	612
	0.96	615	617	607
	0.961	615	613	612
	0.962	612.5	613.5	612
	0.963	612	614	610
	0.964	613.5	614.5	612.5
	0.965	612.5	615	609.5
	0.966	615.5	615.5	613.5
	0.967	611	614	614
	0.968	610.5	614	612
	0.969	613.5	614	608.5
	0.97	614.5	611	611.5
	0.971	614.5	611	612.5
	0.972	615.5	610.5	613
	0.973	613.5	614.5	609
	0.974	613.5	610.5	612.5
	0.975	616	611.5	611.5
	0.976	613.5	616	615
	0.977	614	612	612
	0.978	614	615.5	611
	0.979	614.5	616	608.5
	0.98	613	614.5	611
	0.981	615	616	610.5
	0.982	615.5	615	613.5
	0.983	611.5	610	613.5
	0.984	615	613.5	617
	0.985	615.5	612	612.5
	0.986	616	614	613.5
	0.987	617	614	611.5
	0.988	616	612.5	612
	0.989	614	614	611.5
	0.99	612	616	613.5
	0.991	613.5	613	612
	0.992	616	611.5	611
	0.993	617	614	615.5
	0.994	616	615	615.5
	0.995	614	613.5	614
	0.996	616	615.5	616
	0.997	615.5	614	612
	0.998	615.5	612	615
	0.999	615.5	612.5	611
	1	616.5	613.5	612
	1.001	615.5	612	613.5
	1.002	615.5	611	615.5
	1.003	616	615	613.5
	1.004	616	612	615
	1.005	615.5	614	610
	1.006	614.5	614	615.5
	1.007	613.5	614	611
	1.008	618	615.5	609
	1.009	616	610.5	611
	1.01	615	614	611
	1.011	618	608.5	612
	1.012	614.5	610.5	610.5
	1.013	620	615	615
	1.014	618.5	611.5	611
	1.015	616.5	610.5	613.5
	1.016	616	614	611.5
	1.017	617	610.5	611.5
	1.018	616.5	611.5	610
	1.019	617	614.5	609
	1.02	622.5	617	614
	1.021	617.5	611	609
	1.022	619	615	612
	1.023	616	609.5	610.5
	1.024	619.5	613	613
	1.025	618.5	614.5	611.5
	1.026	618.5	616	611
	1.027	616	613	613
	1.028	616	613.5	611
	1.029	613.5	611	611
	1.03	616.5	613.5	611
	1.031	615.5	612.5	614
	1.032	619.5	612.5	609
	1.033	617	613	612
	1.034	617.5	612.5	612
	1.035	615.5	611.5	613.5
	1.036	616	613	611.5
	1.037	616	615.5	610
	1.038	612.5	615	611
	1.039	617	611.5	609
	1.04	615.5	613.5	613.5
	1.041	616	614	614
	1.042	614	613.5	612
	1.043	619	612.5	613.5
	1.044	618	608.5	611.5
	1.045	618	616.5	612
	1.046	615.5	613	611.5
	1.047	615.5	613.5	610.5
	1.048	618	612.5	611.5
	1.049	617.5	616.5	611
	1.05	618	615	612
	1.051	619	611.5	614
	1.052	616	611.5	612
	1.053	613	614	614.5
	1.054	618	612.5	613
	1.055	615.5	613.5	613
	1.056	614.5	614.5	613.5
	1.057	615.5	615.5	615.5
	1.058	619	617	613.5
	1.059	615.5	613	613
	1.06	618	610	613
	1.061	618.5	611	612
	1.062	617	608.5	612
	1.063	617	614	616
	1.064	617.5	611.5	611
	1.065	616	612.5	614.5
	1.066	618.5	609	616.5
	1.067	613.5	614	613
	1.068	616	611.5	612
	1.069	617	614.5	615
	1.07	614.5	612	616
	1.071	614.5	613	615.5
	1.072	618.5	611.5	612.5
	1.073	614.5	610.5	613.5
	1.074	615	613	615.5
	1.075	612	613.5	613.5
	1.076	615.5	612	615.5
	1.077	612.5	611.5	617
	1.078	613.5	608.5	616
	1.079	614	610.5	613
	1.08	615	614	615
	1.081	614.5	612	612.5
	1.082	616	614.5	615.5
	1.083	615.5	609	613
	1.084	614.5	612	613.5
	1.085	616	612	616
	1.086	615.5	612	615.5
	1.087	612.5	611.5	618.5
	1.088	615	616.5	614.5
	1.089	615.5	611	615
	1.09	615.5	607.5	613.5
	1.091	620	616	616.5
	1.092	616	610.5	615.5
	1.093	616.5	611	615.5
	1.094	618.5	613.5	616
	1.095	616	608.5	613.5
	1.096	618.5	609	614
	1.097	619.5	611.5	614
	1.098	618.5	611.5	615.5
	1.099	618	608.5	616.5
	1.1	622.5	611.5	614
	1.101	619	614	613
	1.102	619	612	611.5
	1.103	623	612.5	614.5
	1.104	622.5	610.5	616
	1.105	619	615.5	610.5
	1.106	621.5	613.5	612
	1.107	624.5	611	612
	1.108	622.5	614.5	614.5
	1.109	623	613.5	611
	1.11	622.5	610.5	611.5
	1.111	622	615	615.5
	1.112	622.5	612	612
	1.113	622.5	614.5	611.5
	1.114	622	612.5	613
	1.115	622.5	608.5	611.5
	1.116	624.5	612	610.5
	1.117	623	611.5	611.5
	1.118	626	612	610.5
	1.119	626	610.5	609
	1.12	623.5	615.5	611.5
	1.121	624.5	614.5	609
	1.122	624	614	611.5
	1.123	621	615.5	609.5
	1.124	623.5	615.5	609
	1.125	624.5	614	610.5
	1.126	623.5	615.5	611
	1.127	621.5	612	612
	1.128	622	612.5	608.5
	1.129	622	615.5	612
	1.13	621.5	609.5	613
	1.131	619.5	612	615
	1.132	620	614	613
	1.133	621	613.5	615
	1.134	620.5	613.5	611
	1.135	619	615	613
	1.136	614.5	615	610.5
	1.137	621	614.5	613.5
	1.138	615.5	615.5	615.5
	1.139	615.5	611	612
	1.14	620	615	610.5
	1.141	618	615.5	613.5
	1.142	619	615.5	615
	1.143	617.5	613	612
	1.144	616	615	611
	1.145	617.5	617	610.5
	1.146	616	612	616
	1.147	619	615	613.5
	1.148	613	613.5	612
	1.149	618.5	612	614.5
	1.15	613	616	615
	1.151	615.5	619	611.5
	1.152	613	615.5	613.5
	1.153	613.5	613.5	613.5
	1.154	612	612.5	612
	1.155	612	615	614.5
	1.156	615	613.5	615.5
	1.157	613.5	611	612.5
	1.158	614	609	617.5
	1.159	610.5	611	613.5
	1.16	609.5	614	613.5
	1.161	612.5	611.5	613.5
	1.162	614	611.5	615.5
	1.163	609.5	609	618
	1.164	611.5	609	612
	1.165	614	612.5	611
	1.166	614.5	612	613
	1.167	609.5	608.5	615
	1.168	611.5	612	619.5
	1.169	611.5	608.5	613.5
	1.17	612.5	609.5	613.5
	1.171	610	613	615.5
	1.172	612	612	612
	1.173	611	613.5	614
	1.174	612	612	613.5
	1.175	613.5	615	613.5
	1.176	613.5	611	613.5
	1.177	607	608.5	612
	1.178	615	610.5	616
	1.179	615.5	614	615
	1.18	611	610.5	616.5
	1.181	611	612	615
	1.182	611.5	608.5	614
	1.183	611.5	614	615
	1.184	615.5	608.5	617
	1.185	610	610.5	614
	1.186	613.5	610.5	616
	1.187	613.5	611	613.5
	1.188	612.5	612	615.5
	1.189	612	612	614
	1.19	612.5	609.5	614
	1.191	614.5	611	613.5
	1.192	610	611.5	617
	1.193	613	611.5	611
	1.194	612.5	609.5	617
	1.195	614	611	613.5
	1.196	614.5	614.5	614.5
	1.197	614	611	611.5
	1.198	613	616.5	612
	1.199	612	613.5	613.5
	1.2	613	615.5	613
	1.201	614	615.5	615.5
	1.202	613.5	613.5	614.5
	1.203	610	616	612
	1.204	612.5	610.5	614
	1.205	613.5	608.5	613.5
	1.206	611.5	611.5	612
	1.207	617	612.5	609.5
	1.208	611.5	610.5	612
	1.209	615.5	615	614.5
	1.21	611.5	613.5	615.5
	1.211	612	609.5	611.5
	1.212	616	612	613.5
	1.213	615	612	612
	1.214	619	615.5	615
	1.215	616	614	615.5
	1.216	614.5	614.5	612
	1.217	615	611.5	614.5
	1.218	616	615.5	615
	1.219	617	615	615
	1.22	613	613.5	613
	1.221	613.5	610.5	615
	1.222	614.5	612	610
	1.223	619	610	615
	1.224	615	613.5	612.5
	1.225	615.5	614.5	615.5
	1.226	614	615.5	617
	1.227	613	614.5	614
	1.228	615.5	615.5	615
	1.229	615.5	611.5	614.5
	1.23	614	615.5	615.5
	1.231	615.5	613.5	609
	1.232	617	615.5	613
	1.233	618.5	609	612
	1.234	615.5	611.5	612
	1.235	614.5	613.5	614
	1.236	620	611	613.5
	1.237	615	615.5	611.5
	1.238	615.5	614	616.5
	1.239	612.5	610.5	615.5
	1.24	614.5	611	615.5
	1.241	615.5	611	614
	1.242	613.5	612	612.5
	1.243	614.5	613	614
	1.244	611.5	612.5	615
	1.245	614.5	612	612.5
	1.246	613.5	613.5	612
	1.247	614	615	615.5
	1.248	613.5	613	611.5
	1.249	612	611	613
	1.25	613.5	608.5	612
	1.251	616	611	615
	1.252	615.5	612	613.5
	1.253	611	611.5	612
	1.254	612	608	614
	1.255	612.5	611	613.5
	1.256	611.5	613.5	612
	1.257	614	613.5	613.5
	1.258	617	610	613
	1.259	612.5	609	611.5
	1.26	618	613	611.5
	1.261	612.5	613	613.5
	1.262	614.5	610	613
	1.263	613	612	614
	1.264	615	609.5	612
	1.265	615.5	610	614
	1.266	615.5	611	611
	1.267	615.5	611.5	617
	1.268	612.5	612.5	614
	1.269	614.5	612	612
	1.27	614.5	608.5	611.5
	1.271	612.5	608	613.5
	1.272	614.5	613.5	615.5
	1.273	614	612.5	612
	1.274	615.5	608.5	616
	1.275	616	611	612.5
	1.276	615.5	613	610.5
	1.277	615.5	609.5	612
	1.278	615.5	613	615.5
	1.279	614	613.5	613
	1.28	616	613	614
	1.281	615	610.5	616.5
	1.282	611.5	613.5	613.5
	1.283	613	615	615
	1.284	612	613	615
	1.285	615	616.5	616
	1.286	613.5	614.5	615
	1.287	615	616	612
	1.288	615.5	613.5	613.5
	1.289	614	612	615.5
	1.29	612.5	614.5	613.5
	1.291	614.5	614.5	612.5
	1.292	613	620	613.5
	1.293	614.5	614.5	614.5
	1.294	614.5	616	614
	1.295	611	617	614.5
	1.296	612	615.5	611.5
	1.297	613.5	615.5	617
	1.298	612.5	616.5	613
	1.299	612	609.5	614.5
	1.3	614.5	616	613.5
	1.301	614.5	619.5	616
	1.302	611.5	618	610.5
	1.303	611.5	620.5	614
	1.304	614.5	618	613
	1.305	616	617	615
	1.306	614	622	617.5
	1.307	612.5	621.5	619
	1.308	613.5	620.5	618
	1.309	613.5	622.5	619.5
	1.31	611.5	619	616
	1.311	614	619.5	617
	1.312	612	620.5	620
	1.313	614	622	615
	1.314	609.5	621.5	611.5
	1.315	611	620.5	618.5
	1.316	610	619.5	614.5
	1.317	609	621	615
	1.318	612.5	623.5	614.5
	1.319	609.5	619.5	615.5
	1.32	610	620	615.5
	1.321	610	623.5	615.5
	1.322	610	623	618
	1.323	608.5	620.5	613
	1.324	613	619.5	615
	1.325	606	614	614.5
	1.326	611	622	616.5
	1.327	608	620.5	615.5
	1.328	609	619	618
	1.329	607	619.5	615
	1.33	608.5	622	615
	1.331	606	619	616
	1.332	606	617.5	615
	1.333	603.5	620	612.5
	1.334	602	615.5	615
	1.335	606	619	613.5
	1.336	603	616	614.5
	1.337	604.5	618.5	614
	1.338	604	620	615.5
	1.339	602	619.5	612.5
	1.34	605.5	621.5	615
	1.341	603	617.5	611.5
	1.342	601	619.5	612
	1.343	603	620	612
	1.344	602	624	612
	1.345	603	620	611.5
	1.346	601.5	616	611
	1.347	601.5	617.5	613.5
	1.348	600	618	611.5
	1.349	601.5	620	616.5
	1.35	597	618.5	614
	1.351	597	619	616
	1.352	597	619	614
	1.353	595	618	615.5
	1.354	596.5	616	613.5
	1.355	595	616.5	614.5
	1.356	597	618.5	615.5
	1.357	596	618.5	612
	1.358	595	614.5	613.5
	1.359	593	617.5	612.5
	1.36	591	615.5	611.5
	1.361	590	623	615.5
	1.362	588	616.5	613
	1.363	589.5	616	615.5
	1.364	593	616	616.5
	1.365	588	618	615
	1.366	586.5	613.5	614
	1.367	584.5	616	617
	1.368	581	618	617
	1.369	587	612	615.5
	1.37	584.5	618.5	615
	1.371	586.5	615	615.5
	1.372	581	614.5	617
	1.373	581.5	616.5	615.5
	1.374	580	617.5	617
	1.375	578	615	615.5
	1.376	577.5	615	615.5
	1.377	579	613.5	615
	1.378	575	613.5	611
	1.379	572.5	615.5	618
	1.38	573.5	613.5	616.5
	1.381	572.5	615.5	618.5
	1.382	571	615.5	613.5
	1.383	571	612.5	616.5
	1.384	568.5	610	617
	1.385	569.5	612	619.5
	1.386	568	614	619
	1.387	564	614	616
	1.388	561.5	611.5	618
	1.389	564	611	619.5
	1.39	563	615	615.5
	1.391	562.5	613.5	619
	1.392	562	616	617.5
	1.393	559	611.5	619.5
	1.394	558.5	617	618.5
	1.395	560	615	618
	1.396	554.5	614.5	615.5
	1.397	553.5	612.5	617
	1.398	554	616	617
	1.399	546	616.5	618.5
	1.4	549	614.5	619.5
	1.401	548	615.5	620.5
	1.402	548.5	616	619
	1.403	548	618.5	616.5
	1.404	543	614	617
	1.405	542.5	616.5	620.5
	1.406	540	616	617.5
	1.407	536	614	623
	1.408	533.5	617	619.5
	1.409	532.5	615	618.5
	1.41	531	616.5	619
	1.411	531	615	622
	1.412	527.5	616.5	620.5
	1.413	529	618	619.5
	1.414	523	617.5	617
	1.415	519	620.5	619
	1.416	519.5	620	621
	1.417	516.5	617	621
	1.418	514.5	615.5	618.5
	1.419	509	616.5	622
	1.42	509	616.5	619.5
	1.421	499	615	622.5
	1.422	499	618	618.5
	1.423	497.5	615	621
	1.424	492.5	615	616
	1.425	494.5	621	620.5
	1.426	488	615.5	621
	1.427	487	616.5	619.5
	1.428	480	615.5	621.5
	1.429	477.5	615.5	619
	1.43	471.5	613.5	618
	1.431	469.5	615	620.5
	1.432	466	616	623.5
	1.433	463.5	615	616.5
	1.434	458	614	620.5
	1.435	458	614	616.5
	1.436	450	614	619
	1.437	444.5	617	618.5
	1.438	441	614	617.5
	1.439	437.5	612.5	618.5
	1.44	430.5	615.5	617
	1.441	430.5	614.5	617
	1.442	424	615	615.5
	1.443	419.5	614.5	617
	1.444	415	613.5	616.5
	1.445	407.5	612.5	617
	1.446	404	612	617
	1.447	399.5	613	614
	1.448	395.5	615.5	617.5
	1.449	392.5	615.5	617.5
	1.45	385.5	615	619.5
	1.451	381	615	620.5
	1.452	379.5	614	617.5
	1.453	371	615	616.5
	1.454	364.5	614.5	614.5
	1.455	363	614.5	615.5
	1.456	358.5	618	617
	1.457	352	612	616
	1.458	349.5	611	615
	1.459	342	616.5	616
	1.46	342	613.5	615
	1.461	335.5	614.5	619.5
	1.462	333	615.5	617
	1.463	325	614.5	619.5
	1.464	323	615.5	615.5
	1.465	317.5	616.5	618
	1.466	312.5	616.5	618
	1.467	306	614	621
	1.468	302	615.5	617.5
	1.469	299.5	614.5	619.5
	1.47	298	615	617.5
	1.471	292	613.5	615.5
	1.472	287	613.5	617
	1.473	286	615.5	618
	1.474	280.5	614	617
	1.475	275	614	623
	1.476	275.5	617	618.5
	1.477	266.5	617.5	618
	1.478	266.5	613	616.5
	1.479	261.5	614	618.5
	1.48	256.5	617	619
	1.481	254.5	614	621
	1.482	249.5	615	617
	1.483	247	618.5	627
	1.484	246	614.5	620.5
	1.485	238.5	610.5	622.5
	1.486	236.5	613.5	617
	1.487	232	613.5	619
	1.488	228.5	610.5	621.5
	1.489	224.5	611	622
	1.49	223.5	612.5	618.5
	1.491	223	609	622
	1.492	216	612	620.5
	1.493	215	610.5	619.5
	1.494	209.5	613	620.5
	1.495	206.5	609	619
	1.496	203	615.5	622
	1.497	205.5	612	622
	1.498	196	611.5	621.5
	1.499	198	608.5	619
	1.5	195.5	608.5	621
	1.501	188.5	610.5	621
	1.502	185	608	618.5
	1.503	184.5	610.5	619.5
	1.504	183.5	608	624
	1.505	179.5	608.5	624.5
	1.506	180	611	619
	1.507	177.5	610.5	621.5
	1.508	173	611.5	617.5
	1.509	170	609.5	618.5
	1.51	176	606.5	626.5
	1.511	170	609	623
	1.512	165.5	607.5	621.5
	1.513	168	609.5	618.5
	1.514	165.5	606.5	622
	1.515	162	606.5	618.5
	1.516	162.5	605.5	623
	1.517	161.5	606.5	620.5
	1.518	158.5	607	618.5
	1.519	157	604.5	621.5
	1.52	156	603	617
	1.521	154.5	608	617.5
	1.522	152.5	604	616
	1.523	153.5	608.5	620
	1.524	156.5	604	617
	1.525	150	605	617
	1.526	148	605.5	616.5
	1.527	148.5	603.5	619
	1.528	153	603	614.5
	1.529	148	599	614
	1.53	146.5	603.5	618.5
	1.531	143.5	604.5	614.5
	1.532	144	603.5	615
	1.533	142	605.5	614.5
	1.534	141	604	613.5
	1.535	145.5	603.5	611.5
	1.536	143.5	604.5	615.5
	1.537	138.5	605.5	610.5
	1.538	142	601.5	612
	1.539	138	601.5	607.5
	1.54	141	605.5	608
	1.541	138.5	604.5	611
	1.542	140	603	605
	1.543	136.5	604.5	608.5
	1.544	140	601	609
	1.545	134	605	608
	1.546	136	606.5	608.5
	1.547	132	608	602
	1.548	136	604	604.5
	1.549	131	605.5	606.5
	1.55	132.5	602.5	604.5
	1.551	133.5	606	604
	1.552	132.5	602.5	605
	1.553	129.5	605	603
	1.554	133	604.5	600.5
	1.555	131	605.5	601.5
	1.556	129.5	601	598.5
	1.557	134	601.5	601.5
	1.558	133	604.5	605
	1.559	130	603.5	597
	1.56	131	603.5	601
	1.561	131	605.5	596.5
	1.562	132	603.5	596.5
	1.563	130	603	596.5
	1.564	130	603.5	596.5
	1.565	131	601	598.5
	1.566	131	598.5	598.5
	1.567	133	601.5	595.5
	1.568	133.5	604	594.5
	1.569	136	604	592.5
	1.57	135	607	594
	1.571	136	604	597
	1.572	132.5	605	594
	1.573	137	604.5	595.5
	1.574	138	603.5	598.5
	1.575	138	602	596.5
	1.576	142.5	608	593.5
	1.577	143.5	602	596.5
	1.578	147.5	601	594.5
	1.579	146	601.5	596.5
	1.58	151	601.5	590.5
	1.581	155	602	594.5
	1.582	157.5	601.5	595
	1.583	159	600.5	589.5
	1.584	160	599.5	594.5
	1.585	165	600.5	594
	1.586	165.5	597	592
	1.587	170	597	593.5
	1.588	171	601.5	590.5
	1.589	174.5	598.5	590.5
	1.59	173	600.5	589.5
	1.591	181	599	592
	1.592	178.5	593.5	591.5
	1.593	182.5	590	588
	1.594	184.5	598.5	589
	1.595	184.5	595.5	588
	1.596	187	594.5	593.5
	1.597	190.5	592	589
	1.598	189.5	596.5	590
	1.599	193	590	588
	1.6	197	593	590.5
	1.601	197	592.5	585.5
	1.602	199.5	589	585.5
	1.603	196.5	590.5	592.5
	1.604	199.5	590.5	585.5
	1.605	201	589.5	586
	1.606	203	589.5	586.5
	1.607	202.5	588.5	586
	1.608	204	589.5	587
	1.609	204	585.5	585.5
	1.61	204.5	586	587
	1.611	203	584.5	582
	1.612	206.5	585.5	587
	1.613	208	583.5	583.5
	1.614	207	584.5	582.5
	1.615	208	582	586
	1.616	207.5	581	583
	1.617	209	583	582
	1.618	212	579	580
	1.619	213	579.5	582
	1.62	215	579.5	580
	1.621	216.5	578.5	579
	1.622	220	575	576
	1.623	221	577	579.5
	1.624	228	573.5	577
	1.625	229.5	573.5	575.5
	1.626	234	572.5	580
	1.627	240	573	574.5
	1.628	237	573.5	572
	1.629	244.5	571.5	574
	1.63	245	569.5	574.5
	1.631	252	567	571
	1.632	253.5	565	572
	1.633	258.5	566	571
	1.634	262	568.5	570
	1.635	266.5	563	569
	1.636	273	568.5	569.5
	1.637	275	566	569.5
	1.638	281.5	560	564
	1.639	285	564.5	566.5
	1.64	294	560.5	563.5
	1.641	300	560.5	567.5
	1.642	298.5	559	563.5
	1.643	306	556.5	561.5
	1.644	313.5	561	564.5
	1.645	313	554	560.5
	1.646	317.5	557	557.5
	1.647	322.5	557.5	560
	1.648	329	557.5	556.5
	1.649	331.5	552.5	556
	1.65	332.5	552.5	554
	1.651	339.5	548	553.5
	1.652	342	548	552.5
	1.653	343.5	547.5	549.5
	1.654	348	543.5	549.5
	1.655	349.5	542	547
	1.656	355.5	539	545
	1.657	362	541	546.5
	1.658	362.5	542	542
	1.659	367.5	539.5	539.5
	1.66	370	534.5	542
	1.661	373	533.5	536
	1.662	380	534	537.5
	1.663	382.5	531	533
	1.664	384.5	532	532
	1.665	390	528.5	533
	1.666	393	527.5	525.5
	1.667	399.5	526	522.5
	1.668	407	522.5	521
	1.669	409.5	521.5	521.5
	1.67	415.5	522.5	518
	1.671	417.5	519.5	515.5
	1.672	424.5	518.5	514
	1.673	433	513	512.5
	1.674	436.5	512.5	504.5
	1.675	440	509.5	508.5
	1.676	447	510.5	499
	1.677	451.5	506.5	497
	1.678	458	506	497.5
	1.679	464.5	503	490.5
	1.68	469.5	502.5	489.5
	1.681	478.5	500	485.5
	1.682	485.5	499	481
	1.683	490	495	482
	1.684	495.5	492.5	476.5
	1.685	503	490	467.5
	1.686	510	486	466
	1.687	518.5	487	467.5
	1.688	526.5	484	461.5
	1.689	533.5	480.5	460
	1.69	540	477	457
	1.691	546.5	476	448.5
	1.692	554	471.5	448
	1.693	564	467.5	439
	1.694	571	468.5	435.5
	1.695	575	459.5	435
	1.696	582	455.5	432.5
	1.697	593	456	429.5
	1.698	600	452.5	421.5
	1.699	608	449.5	415.5
	1.7	609.5	446.5	410
	1.701	622	444.5	409
	1.702	629	437.5	403.5
	1.703	634	433.5	401.5
	1.704	641	432.5	394
	1.705	649.5	428.5	390
	1.706	656	424.5	385.5
	1.707	663.5	419.5	382
	1.708	671	415.5	379.5
	1.709	677.5	411.5	373.5
	1.71	685	406.5	368
	1.711	688.5	403.5	364
	1.712	698	397	357.5
	1.713	704.5	393	350.5
	1.714	710.5	389	346.5
	1.715	721.5	382	344.5
	1.716	725.5	382.5	339.5
	1.717	731	375	333
	1.718	736.5	372.5	330
	1.719	747.5	368	321
	1.72	752	362.5	320.5
	1.721	762	359	314
	1.722	764.5	355.5	309.5
	1.723	767.5	350.5	304.5
	1.724	773.5	348.5	300.5
	1.725	782.5	338	295.5
	1.726	783.5	339	290
	1.727	788.5	335	287
	1.728	793	328	285
	1.729	795.5	322	278
	1.73	803.5	316.5	274
	1.731	808	317	266
	1.732	813	313.5	259.5
	1.733	816.5	312.5	261
	1.734	822	304	255.5
	1.735	826.5	307.5	255
	1.736	830.5	303.5	250
	1.737	835	295	244.5
	1.738	839.5	293	242.5
	1.739	840.5	293.5	239
	1.74	847.5	290	232.5
	1.741	854.5	285.5	233
	1.742	855.5	287	226.5
	1.743	857.5	284	225.5
	1.744	860.5	281.5	223
	1.745	863.5	280.5	218
	1.746	867	273.5	216.5
	1.747	869	277	211
	1.748	869	270	211
	1.749	872	270	207
	1.75	874.5	268.5	207
	1.751	879	266	206
	1.752	881.5	264.5	201
	1.753	883.5	257.5	197
	1.754	883.5	262	196
	1.755	889	256	195.5
	1.756	893.5	254.5	191
	1.757	896	252	192.5
	1.758	898.5	252.5	187
	1.759	899.5	248	187
	1.76	902.5	244.5	186
	1.761	909.5	244.5	184.5
	1.762	909.5	242.5	184.5
	1.763	911.5	239	182.5
	1.764	915.5	237	181
	1.765	918	235	177.5
	1.766	924	232.5	172.5
	1.767	926.5	229	176
	1.768	929	227	175
	1.769	931	227.5	172
	1.77	929	225.5	169.5
	1.771	934	224.5	171
	1.772	936	222	168
	1.773	936	218	167
	1.774	941.5	218.5	166
	1.775	946	216.5	165.5
	1.776	944	213.5	165
	1.777	947.5	207.5	165
	1.778	949	212	160.5
	1.779	949.5	212	161.5
	1.78	956	208	162.5
	1.781	959.5	206.5	161
	1.782	962	205.5	161
	1.783	964	201	158.5
	1.784	967	202	158.5
	1.785	968	204	158.5
	1.786	975	197	157
	1.787	978.5	196	155.5
	1.788	983.5	193.5	155
	1.789	986.5	193	154
	1.79	993	193	151.5
	1.791	995.5	190.5	156.5
	1.792	1001.5	189.5	153.5
	1.793	1006	186.5	150
	1.794	1009.5	185	149.5
	1.795	1013.5	184.5	152.5
	1.796	1021	182	151
	1.797	1023	181.5	149
	1.798	1027.5	178.5	150
	1.799	1034	181	144.5
	1.8	1035.5	176	148.5
	1.801	1042.5	177.5	149
	1.802	1043.5	176.5	146.5
	1.803	1054	173.5	146.5
	1.804	1053.5	173	146.5
	1.805	1060.5	168.5	146
	1.806	1060	169.5	145.5
	1.807	1070	166.5	146.5
	1.808	1075.5	167	145
	1.809	1080.5	167	148
	1.81	1085	164	145.5
	1.811	1088	164	146
	1.812	1098	162.5	145.5
	1.813	1103.5	157.5	144
	1.814	1107.5	160	143.5
	1.815	1113	158	147.5
	1.816	1120.5	159.5	143.5
	1.817	1121.5	158	146.5
	1.818	1129.5	156.5	144.5
	1.819	1133.5	157	143
	1.82	1136	152.5	139.5
	1.821	1147.5	152	146.5
	1.822	1152.5	154	142.5
	1.823	1156	151.5	142
	1.824	1159.5	151	144.5
	1.825	1162.5	152.5	146
	1.826	1166	153	142
	1.827	1167	152	143.5
	1.828	1170	150	146
	1.829	1174.5	151	143.5
	1.83	1181	155	143.5
	1.831	1184	150	145.5
	1.832	1184.5	143.5	147.5
	1.833	1187.5	150	147
	1.834	1200.5	150	147.5
	1.835	1197	149	144.5
	1.836	1202.5	151	145.5
	1.837	1202.5	148.5	150
	1.838	1208	149.5	150
	1.839	1213	148.5	150.5
	1.84	1219	153.5	155.5
	1.841	1223	156	157
	1.842	1224.5	153.5	156.5
	1.843	1226.5	155	157
	1.844	1233.5	154	156
	1.845	1237	161	161.5
	1.846	1241.5	161.5	162
	1.847	1248	165	163
	1.848	1250	167.5	165
	1.849	1259	173	164
	1.85	1261	176.5	169
	1.851	1269	180	168
	1.852	1270	184	169
	1.853	1278.5	188	171
	1.854	1282	190.5	177
	1.855	1290	192	176
	1.856	1293.5	195	179.5
	1.857	1303.5	201	180
	1.858	1308.5	201	184.5
	1.859	1314	208.5	186
	1.86	1323.5	213	185.5
	1.861	1330	212.5	190.5
	1.862	1336.5	214.5	191
	1.863	1342	223	193
	1.864	1347	220.5	195.5
	1.865	1351.5	225.5	198
	1.866	1359	224.5	203.5
	1.867	1359	226	205
	1.868	1361	231.5	210
	1.869	1371	230	209
	1.87	1374.5	230.5	213
	1.871	1379.5	227	221.5
	1.872	1383	231.5	221.5
	1.873	1386.5	233.5	222
	1.874	1391	236	227
	1.875	1393	234	233.5
	1.876	1395	235	234.5
	1.877	1397	235	238
	1.878	1402	235.5	244
	1.879	1402	238	243.5
	1.88	1403.5	241	246
	1.881	1398	237.5	255
	1.882	1408.5	238.5	255.5
	1.883	1410.5	242	259.5
	1.884	1412	241	263.5
	1.885	1411	248	270.5
	1.886	1417.5	244	271
	1.887	1416.5	247.5	277.5
	1.888	1418	250	282.5
	1.889	1418.5	252.5	283
	1.89	1417	252	289.5
	1.891	1421	254	291.5
	1.892	1424	254.5	297.5
	1.893	1422	259	300.5
	1.894	1424.5	257.5	303.5
	1.895	1426	262	310
	1.896	1427.5	264.5	314.5
	1.897	1426	268	315
	1.898	1427	273	324
	1.899	1428.5	277.5	324
	1.9	1424.5	282	330.5
	1.901	1426	285	335
	1.902	1422.5	287	341
	1.903	1423.5	288	343
	1.904	1424.5	296.5	346.5
	1.905	1422.5	302	348.5
	1.906	1426	303.5	355
	1.907	1422.5	308	357.5
	1.908	1422.5	313	362
	1.909	1421	315	364.5
	1.91	1419.5	314.5	370
	1.911	1417	318.5	375.5
	1.912	1419.5	325	381
	1.913	1418	328.5	383.5
	1.914	1419.5	331	388.5
	1.915	1418.5	337.5	396.5
	1.916	1415	340	400
	1.917	1418	342.5	406
	1.918	1415.5	347.5	415
	1.919	1416	352	418
	1.92	1414	353	425.5
	1.921	1412	356.5	432.5
	1.922	1409	360.5	435
	1.923	1410.5	363.5	444.5
	1.924	1405.5	361	450
	1.925	1405.5	367.5	458
	1.926	1405.5	369	465
	1.927	1403	370.5	472
	1.928	1401.5	376	479
	1.929	1401.5	378.5	485.5
	1.93	1399.5	381	493
	1.931	1398	389	500
	1.932	1395.5	391	507.5
	1.933	1394.5	396.5	512.5
	1.934	1397	401.5	522.5
	1.935	1391	408.5	530
	1.936	1389	413.5	534
	1.937	1390	425.5	542.5
	1.938	1387.5	430	547.5
	1.939	1389	438.5	556
	1.94	1389.5	446	560.5
	1.941	1380	456.5	569
	1.942	1379.5	463.5	575.5
	1.943	1374.5	472	581
	1.944	1370.5	477	585
	1.945	1369.5	483.5	594
	1.946	1366.5	493	603.5
	1.947	1361	502.5	608
	1.948	1361	507	614
	1.949	1357	517	621.5
	1.95	1357	521.5	630.5
	1.951	1350	526	637
	1.952	1349	533.5	643.5
	1.953	1348.5	539.5	653
	1.954	1344	541.5	656
	1.955	1343	543.5	664
	1.956	1342	547.5	673
	1.957	1338	555.5	673.5
	1.958	1337.5	560	685.5
	1.959	1330	562.5	692.5
	1.96	1329	571.5	696
	1.961	1325.5	574.5	704.5
	1.962	1323.5	581	711
	1.963	1320	581.5	716.5
	1.964	1314	587.5	720
	1.965	1311.5	592	728.5
	1.966	1309.5	594.5	734
	1.967	1305	598.5	743
	1.968	1293.5	601.5	747.5
	1.969	1293.5	605	754.5
	1.97	1293.5	608.5	756.5
	1.971	1292	610.5	766.5
	1.972	1284.5	616.5	772
	1.973	1282.5	619	778
	1.974	1279	620.5	781.5
	1.975	1272	621.5	792
	1.976	1273	627.5	796
	1.977	1272	627.5	801.5
	1.978	1271.5	633	808.5
	1.979	1267.5	636	813
	1.98	1260	641	816
	1.981	1262	646	821
	1.982	1259.5	645.5	822
	1.983	1251	651	825
	1.984	1251.5	656.5	825.5
	1.985	1248	658.5	832
	1.986	1247	665.5	835.5
	1.987	1241.5	668	835.5
	1.988	1239.5	671	840.5
	1.989	1238	678	843
	1.99	1232	683.5	843
	1.991	1231	689.5	847.5
	1.992	1229	697	848
	1.993	1226.5	699.5	849.5
[truncated: 5,006 more rows]

## Sheet: G
DataTypeVer2.0	Time	Fz	Fz	Fz
NumberOfData		15000	15000	9000
PreTriggerData		0	0	0
SamplingTime[ms]		1	1	1
DataLabel		AA1:CMJ	AA2:CMJ	AA3:CMJ
DataUnit	sec	N	N	N
	0	672.5	673.5	674
	0.001	672.5	670.5	671.5
	0.002	670.5	670.5	673.5
	0.003	670	671	670
	0.004	671	668.5	673.5
	0.005	670.5	674.5	671.5
	0.006	673.5	668.5	671.5
	0.007	668.5	672.5	673.5
	0.008	672.5	672	669.5
	0.009	670	665	674
	0.01	673.5	672.5	675
	0.011	671.5	672.5	675.5
	0.012	672	670	671
	0.013	669.5	670.5	671
	0.014	671	670.5	673
	0.015	668.5	671	675.5
	0.016	668.5	670	672.5
	0.017	670	670	671
	0.018	671	673	675
	0.019	672	668.5	675.5
	0.02	668	671	674
	0.021	672.5	668.5	672.5
	0.022	669.5	671.5	673.5
	0.023	668	669	676
	0.024	670.5	668	674.5
	0.025	672	675	673.5
	0.026	669	673	673
	0.027	671.5	672.5	670.5
	0.028	668	669.5	675
	0.029	668	669.5	674
	0.03	668.5	670	669.5
	0.031	670	671.5	674.5
	0.032	669	671.5	677
	0.033	670	669.5	675.5
	0.034	670	673.5	672.5
	0.035	670	670	674
	0.036	672.5	671.5	673.5
	0.037	669	669.5	672.5
	0.038	671.5	669	673
	0.039	670.5	669.5	677
	0.04	670	669	672
	0.041	671.5	670	671.5
	0.042	672.5	667	675.5
	0.043	673	671	672.5
	0.044	670.5	671	673
	0.045	673	669.5	676.5
	0.046	670.5	668	672
	0.047	674.5	674.5	674.5
	0.048	671	666	672.5
	0.049	670	673	672.5
	0.05	671.5	671.5	671
	0.051	670	671	675
	0.052	670	672.5	672.5
	0.053	669.5	666	673.5
	0.054	670	668.5	673.5
	0.055	676	668.5	673.5
	0.056	669	670	674.5
	0.057	670.5	669	673
	0.058	674	669	675
	0.059	668.5	674	672
	0.06	670.5	670	671.5
	0.061	672	670	673
	0.062	672	668	672.5
	0.063	669.5	673.5	670
	0.064	669.5	668.5	672
	0.065	669	671.5	673
	0.066	670	666	673.5
	0.067	673	671.5	674
	0.068	671.5	672.5	671.5
	0.069	669	670.5	668.5
	0.07	668	672	673.5
	0.071	670.5	671.5	672.5
	0.072	675	671.5	669.5
	0.073	666	671	670.5
	0.074	671.5	671	672
	0.075	671	671	668.5
	0.076	671.5	670.5	670
	0.077	669.5	671	673.5
	0.078	669.5	670.5	671.5
	0.079	669	673.5	670.5
	0.08	670	673.5	675
	0.081	669	670	667
	0.082	668	670	670
	0.083	670.5	673	670
	0.084	668.5	671.5	673
	0.085	673.5	671.5	671
	0.086	669.5	673	669
	0.087	668.5	672	673.5
	0.088	667.5	674	670
	0.089	669	670.5	666
	0.09	671	673	672.5
	0.091	672.5	673	670.5
	0.092	671.5	673	668.5
	0.093	670.5	669	672.5
	0.094	670	670	672
	0.095	670	669	670.5
	0.096	670	669.5	673.5
	0.097	674.5	669.5	673.5
	0.098	668.5	675	671.5
	0.099	670	673.5	668.5
	0.1	669.5	671.5	670.5
	0.101	669	672	668.5
	0.102	670	671	671
	0.103	668	671.5	670.5
	0.104	670	673.5	671
	0.105	669	670.5	671
	0.106	670	672.5	673
	0.107	666	671	673
	0.108	672.5	667.5	670.5
	0.109	670.5	671.5	673.5
	0.11	668.5	670	670.5
	0.111	670	670.5	667
	0.112	666	673.5	670
	0.113	670	672.5	670.5
	0.114	671	672.5	672
	0.115	669	673	666.5
	0.116	668.5	672.5	670
	0.117	672.5	671	671
	0.118	667.5	670	673.5
	0.119	671	673.5	669.5
	0.12	672.5	674	669
	0.121	670.5	670	671
	0.122	667.5	674	667.5
	0.123	669	672.5	670
	0.124	670	672	670
	0.125	670	670	670
	0.126	670.5	672.5	676
	0.127	671.5	672.5	670
	0.128	669	670.5	670.5
	0.129	670	670	668.5
	0.13	672.5	676.5	673
	0.131	670	676	670.5
	0.132	672.5	672.5	673
	0.133	670	673.5	668.5
	0.134	671.5	670	670
	0.135	672.5	675	671.5
	0.136	670	670	670
	0.137	670	671.5	670
	0.138	671	673.5	670
	0.139	673.5	673	666
	0.14	669	674.5	670
	0.141	670	674.5	670.5
	0.142	667.5	670.5	667.5
	0.143	672	673	671.5
	0.144	669.5	671	670.5
	0.145	668	669	669
	0.146	670	672	671
	0.147	670	670	673.5
	0.148	672.5	668	672.5
	0.149	671	672.5	673.5
	0.15	670.5	670	673.5
	0.151	670.5	671	671
	0.152	669	673.5	670.5
	0.153	669	673.5	669.5
	0.154	672	672	671.5
	0.155	670	671.5	670
	0.156	670.5	669.5	671
	0.157	667.5	668	670
	0.158	670.5	671	670
	0.159	669	671.5	670.5
	0.16	669	674	669
	0.161	670.5	670.5	668.5
	0.162	669.5	670	670
	0.163	670.5	671	673.5
	0.164	669	670.5	670
	0.165	670	668	673.5
	0.166	671	666	670
	0.167	668	673	673.5
	0.168	669	673	672.5
	0.169	669	670	672.5
	0.17	669.5	671.5	672.5
	0.171	670	675	670.5
	0.172	670	671	671.5
	0.173	667	669	670.5
	0.174	668	672	672
	0.175	668	672.5	671.5
	0.176	669.5	673.5	673.5
	0.177	668.5	672	674.5
	0.178	668	673	673
	0.179	670	672.5	671.5
	0.18	669.5	669	671
	0.181	669.5	675	668.5
	0.182	670	669	673
	0.183	670	672	672.5
	0.184	670.5	669	671.5
	0.185	670	671	671
	0.186	667.5	672	669.5
	0.187	669	673.5	673.5
	0.188	669.5	672	670.5
	0.189	670	673	671.5
	0.19	668.5	673.5	672.5
	0.191	666	673	673.5
	0.192	667.5	673.5	670
	0.193	668	670.5	670.5
	0.194	670.5	670	675
	0.195	670	670.5	672.5
	0.196	667	674	673.5
	0.197	668.5	672	674
	0.198	668.5	674	671
	0.199	668	675.5	671
	0.2	666	672	670.5
	0.201	670	671	671.5
	0.202	671	673.5	673.5
	0.203	668	675.5	672
	0.204	671.5	673	671
	0.205	670	671	673.5
	0.206	672.5	673	671
	0.207	671	674	673
	0.208	667.5	671	673
	0.209	668	670.5	671.5
	0.21	667	675.5	673
	0.211	669	675	670.5
	0.212	668	676	670.5
	0.213	668.5	670.5	673.5
	0.214	670.5	674.5	675
	0.215	667	675.5	669.5
	0.216	670	670	672.5
	0.217	671	672.5	673
	0.218	667.5	675	676
	0.219	669	671.5	670
	0.22	668	670.5	673.5
	0.221	670	671.5	670.5
	0.222	671.5	670.5	673
	0.223	669.5	674	676.5
	0.224	673.5	674.5	670
	0.225	668	670	670.5
	0.226	666	670	671.5
	0.227	670	672	671.5
	0.228	671.5	671	674.5
	0.229	669.5	672.5	672.5
	0.23	669.5	672	673
	0.231	666	673	673.5
	0.232	666	671	674
	0.233	670	671	672.5
	0.234	670.5	670	674.5
	0.235	670	670.5	671
	0.236	669.5	672.5	674.5
	0.237	669.5	674.5	673.5
	0.238	667	669	671.5
	0.239	666	673.5	675.5
	0.24	670	670.5	672.5
	0.241	669	670	675
	0.242	668.5	671.5	673.5
	0.243	668	669.5	674.5
	0.244	664.5	670	675
	0.245	668	670	674
	0.246	670.5	671.5	671.5
	0.247	668	671.5	672
	0.248	667	671	676.5
	0.249	666	669	675
	0.25	667.5	667.5	672
	0.251	668	671	677
	0.252	667.5	669.5	675.5
	0.253	669	665	675.5
	0.254	673.5	670	672
	0.255	669.5	667.5	671.5
	0.256	668.5	666	672
	0.257	670	671	673
	0.258	669.5	668	672.5
	0.259	670	669.5	675
	0.26	670	668.5	674
	0.261	669	669	674.5
	0.262	670	667.5	675
	0.263	668.5	672.5	672.5
	0.264	667	667	674
	0.265	667	669.5	671
	0.266	668	671	672
	0.267	669	672	673
	0.268	670.5	670	671
	0.269	668.5	666	673
	0.27	666	670	673.5
	0.271	669	664.5	669.5
	0.272	669	668.5	674.5
	0.273	670	675	672
	0.274	667.5	668	674
	0.275	670	670.5	668.5
	0.276	668.5	668.5	674
	0.277	669	668	670.5
	0.278	666	671.5	673
	0.279	669	669	670
	0.28	669.5	669	670.5
	0.281	669	664.5	673
	0.282	669	669	671.5
	0.283	667	666	670
	0.284	667.5	669.5	670
	0.285	668.5	666	673.5
	0.286	670.5	672	670
	0.287	666	670	670.5
	0.288	672	671.5	674
	0.289	672.5	668.5	670
	0.29	670	669	672
	0.291	669	668.5	670
	0.292	671	669	669
	0.293	668	673	671.5
	0.294	669	669.5	670
	0.295	671.5	670	670
	0.296	670	669.5	671
	0.297	669.5	670	672.5
	0.298	669	669	674.5
	0.299	668.5	668.5	673
	0.3	667	666	672
	0.301	668	670	666
	0.302	671.5	668.5	673
	0.303	668	667	672.5
	0.304	670	671	671.5
	0.305	667.5	669	671.5
	0.306	666	672	669
	0.307	671.5	670	668
	0.308	670	672	671.5
	0.309	670	666.5	674
	0.31	671.5	670	670
	0.311	669.5	672.5	670
	0.312	669	669.5	672.5
	0.313	666	670.5	675
	0.314	667	670	671.5
	0.315	668	670.5	669
	0.316	669.5	670.5	675.5
	0.317	670	672.5	674.5
	0.318	667	671.5	671
	0.319	668.5	671	671
	0.32	668.5	670	670.5
	0.321	670	672.5	671
	0.322	665.5	672.5	673.5
	0.323	667.5	671.5	673
	0.324	666	671.5	671
	0.325	670.5	669.5	670.5
	0.326	668.5	670.5	674.5
	0.327	666	667.5	674.5
	0.328	672	670	670.5
	0.329	664	668	671
	0.33	667.5	670	669.5
	0.331	668	668.5	671.5
	0.332	667.5	670	674.5
	0.333	669.5	670.5	674.5
	0.334	668	672	672
	0.335	667.5	671	672
	0.336	667	671	672
	0.337	668.5	670	669
	0.338	669	670	673
	0.339	668	672.5	669
	0.34	667.5	669	671.5
	0.341	668.5	670.5	673
	0.342	667	673	670
	0.343	669.5	674	670
	0.344	669	672	669
	0.345	670	670	672
	0.346	673	670.5	673
	0.347	670.5	669.5	676
	0.348	668.5	670	670
	0.349	666	670.5	670.5
	0.35	672	671	668
	0.351	670.5	671.5	671.5
	0.352	667.5	670	670.5
	0.353	670	666	670
	0.354	669	672.5	668
	0.355	671	672.5	673.5
	0.356	672.5	672.5	671
	0.357	672.5	672	673
	0.358	667.5	671	669
	0.359	668.5	670	670.5
	0.36	670	670.5	675
	0.361	671	671	673.5
	0.362	667.5	670.5	670
	0.363	669.5	671	675
	0.364	674	670	672
	0.365	668	670	674
	0.366	672.5	668.5	673
	0.367	672.5	670.5	670.5
	0.368	669	671	669.5
	0.369	668.5	670	676
	0.37	668	672.5	672
	0.371	672.5	674.5	673.5
	0.372	673	667.5	670.5
	0.373	672.5	670	671
	0.374	672.5	672	672.5
	0.375	673.5	672.5	670.5
	0.376	670.5	668.5	673
	0.377	677	671	673.5
	0.378	673	673	674.5
	0.379	670	669.5	670
	0.38	674	671.5	673.5
	0.381	671	669.5	670
	0.382	670.5	666	672
	0.383	672.5	669.5	674.5
	0.384	670	670.5	673
	0.385	673	672.5	671.5
	0.386	673.5	670	673.5
	0.387	674	670.5	673
	0.388	673	671	673.5
	0.389	671.5	675	676.5
	0.39	669.5	671.5	675
	0.391	672.5	670	670.5
	0.392	672	673.5	673.5
	0.393	669.5	674.5	673.5
	0.394	670.5	669	671.5
	0.395	671.5	670.5	675
	0.396	670.5	670	672.5
	0.397	672	673.5	672.5
	0.398	672	672.5	674.5
	0.399	668.5	669.5	672.5
	0.4	671	669	676
	0.401	675.5	670.5	670.5
	0.402	670	671.5	675.5
	0.403	670	670	671
	0.404	670	670	672.5
	0.405	669.5	673	670
	0.406	671	668	671.5
	0.407	670.5	670.5	672.5
	0.408	670.5	670	673
	0.409	666	671.5	671
	0.41	668.5	670.5	673
	0.411	666	668	672
	0.412	672	673.5	676
	0.413	666	667.5	674
	0.414	670	671.5	675
	0.415	666	671.5	674
	0.416	669.5	669	671.5
	0.417	670	671.5	672
	0.418	670	669	675.5
	0.419	670	666	674.5
	0.42	666	668	671.5
	0.421	669.5	673	674
	0.422	668.5	672.5	673.5
	0.423	668	670	673
	0.424	668.5	672	673
	0.425	665.5	669	674
	0.426	666.5	673.5	673.5
	0.427	665	670	673
	0.428	665.5	673.5	671
	0.429	666	672.5	673.5
	0.43	666	674	672.5
	0.431	666	668.5	671
	0.432	664.5	672.5	670.5
	0.433	666	671.5	673
	0.434	667.5	670	670
	0.435	665.5	672.5	674.5
	0.436	663.5	669.5	674
	0.437	662.5	670.5	668.5
	0.438	664.5	672	671.5
	0.439	666	670.5	674
	0.44	664	674.5	674.5
	0.441	665.5	671	673
	0.442	664	671	669.5
	0.443	664.5	671.5	672
	0.444	663	669	671
	0.445	663.5	670	669
	0.446	665.5	671.5	674
	0.447	659.5	671	673
	0.448	665	671.5	672
	0.449	666	670.5	670.5
	0.45	665	669.5	673
	0.451	667	670	669.5
	0.452	668	670.5	673
	0.453	666	672.5	667.5
	0.454	663.5	668	673.5
	0.455	665.5	672.5	672
	0.456	664.5	671.5	672.5
	0.457	666	670	670
	0.458	666.5	667	668.5
	0.459	665	669.5	672
	0.46	668	669.5	670
	0.461	666	669.5	669.5
	0.462	663.5	669	671
	0.463	663	671.5	670.5
	0.464	664.5	670	670
	0.465	666	673	673.5
	0.466	666	670.5	673
	0.467	670	672	671.5
	0.468	666	671.5	669.5
	0.469	666	671	672
	0.47	665.5	672	672
	0.471	666	670	670
	0.472	664	670.5	671.5
	0.473	665.5	670.5	672.5
	0.474	669.5	670	671
	0.475	665	670.5	673
	0.476	667	670.5	670
	0.477	668	670.5	673.5
	0.478	665.5	668	671.5
	0.479	666	670.5	672.5
	0.48	665.5	673	669
	0.481	669	669	671.5
	0.482	669.5	669	671
	0.483	666	668	672.5
	0.484	667.5	670.5	672.5
	0.485	667.5	669.5	673.5
	0.486	666	673	673
	0.487	668.5	668	672.5
	0.488	666	669	671.5
	0.489	668	672	670.5
	0.49	669.5	673.5	671.5
	0.491	666	670.5	671.5
	0.492	669.5	671	669
	0.493	666	670	673.5
	0.494	667.5	671.5	676
	0.495	669	672	672.5
	0.496	666	670.5	670.5
	0.497	665.5	670	672.5
	0.498	669.5	670	672.5
	0.499	669.5	671.5	670
	0.5	665.5	667	671
	0.501	666	669	671.5
	0.502	668.5	670.5	671
	0.503	667.5	670	670.5
	0.504	668	670.5	673
	0.505	668	669.5	674
	0.506	666	670.5	671.5
	0.507	669	674.5	671
	0.508	668.5	671	670
	0.509	668.5	670	672.5
	0.51	668.5	673.5	673.5
	0.511	669.5	672	672.5
	0.512	669	670.5	671.5
	0.513	669	671.5	673.5
	0.514	663.5	670.5	675.5
	0.515	667.5	671.5	672
	0.516	669.5	668	669
	0.517	669	670.5	671.5
	0.518	669	668	675.5
	0.519	666	668.5	671.5
	0.52	669	669	671.5
	0.521	671	670	674.5
	0.522	672	670	671
	0.523	669.5	673	672
	0.524	670.5	666	672.5
	0.525	669	669.5	671.5
	0.526	670.5	670	669
	0.527	672.5	670	671
	0.528	671.5	670	673.5
	0.529	671	671.5	672
	0.53	668.5	668.5	675
	0.531	674	674	673.5
	0.532	666	672.5	674.5
	0.533	669	671.5	675.5
	0.534	671.5	669.5	672.5
	0.535	669.5	672.5	672.5
	0.536	668	671	675.5
	0.537	671.5	670	677
	0.538	671.5	672	674.5
	0.539	672.5	671	674.5
	0.54	671.5	669.5	672.5
	0.541	671.5	670.5	672.5
	0.542	675	673.5	673.5
	0.543	673.5	674.5	673.5
	0.544	670	670	673
	0.545	667.5	669	671
	0.546	673.5	666	671.5
	0.547	669	670	671
	0.548	671	671	672.5
	0.549	672	672	672
	0.55	670.5	672.5	672.5
	0.551	671.5	671.5	675
	0.552	671.5	669.5	675
	0.553	668.5	665.5	672.5
	0.554	674.5	670.5	674.5
	0.555	672	671.5	674.5
	0.556	673.5	672.5	669.5
	0.557	670.5	670	670.5
	0.558	672	676.5	670
	0.559	670	672.5	672.5
	0.56	674	673	672.5
	0.561	671.5	673.5	671
	0.562	670	670.5	675
	0.563	673	673	675
	0.564	672.5	670.5	672
	0.565	672.5	671.5	669
	0.566	673	672	675
	0.567	672	670.5	670.5
	0.568	672.5	672	672
	0.569	675.5	673	671.5
	0.57	670	670	672.5
	0.571	670	673.5	670
	0.572	671.5	668.5	670.5
	0.573	670	673	674.5
	0.574	671	670.5	676
	0.575	672	673	677
	0.576	670.5	667.5	673.5
	0.577	672.5	673	677
	0.578	673.5	670.5	673
	0.579	673.5	672	671.5
	0.58	671.5	669.5	671.5
	0.581	674.5	671.5	670.5
	0.582	674.5	672	675.5
	0.583	674.5	669.5	674.5
	0.584	672.5	670	671
	0.585	673.5	672.5	670
	0.586	670	672.5	669
	0.587	671	667.5	673.5
	0.588	671	672.5	672
	0.589	671.5	668	671
	0.59	671	670	671
	0.591	670.5	668	671.5
	0.592	670.5	672.5	669.5
	0.593	675.5	675.5	672.5
	0.594	674.5	666	668.5
	0.595	670	671	669.5
	0.596	675	667	674
	0.597	673.5	668.5	672
	0.598	670	670	672
	0.599	674	670	670
	0.6	670	671	669.5
	0.601	670	668	670.5
	0.602	670	670	668
	0.603	668.5	670.5	667.5
	0.604	673.5	670	671
	0.605	671.5	670	670
	0.606	668	669.5	672
	0.607	669.5	670	671.5
	0.608	670	669	669
	0.609	669.5	670.5	670
	0.61	671	670	673
	0.611	668	668.5	668
	0.612	672.5	669	670
	0.613	667.5	670	669
	0.614	668	668.5	666
	0.615	674.5	670	669.5
	0.616	672	671.5	669
	0.617	672.5	670	666
	0.618	670.5	668.5	670
	0.619	667.5	670	667.5
	0.62	670	669.5	669
	0.621	670	671.5	669.5
	0.622	669	669	669.5
	0.623	670.5	667.5	664.5
	0.624	668.5	670.5	669
	0.625	669	666	672.5
	0.626	669	671	667.5
	0.627	668.5	669.5	668.5
	0.628	668.5	667	666
	0.629	669	670	671.5
	0.63	670	668	670
	0.631	666	669	670.5
	0.632	669.5	668	670
	0.633	669.5	670	667.5
	0.634	668	670	669
	0.635	668	669.5	669
	0.636	670	671.5	669
	0.637	665.5	665.5	666
	0.638	670	670	666
	0.639	668.5	668	667.5
	0.64	666	670	667.5
	0.641	670	670	670
	0.642	669.5	669.5	668.5
	0.643	665.5	669.5	668
	0.644	667.5	665	669
	0.645	666	670	668
	0.646	670.5	671.5	668.5
	0.647	666	669	666
	0.648	665.5	669	670
	0.649	668	667.5	670
	0.65	667.5	670	669.5
	0.651	669.5	669.5	670.5
	0.652	669	669	670
	0.653	667.5	669	671
	0.654	667.5	670	670
	0.655	670.5	672.5	669
	0.656	666	670.5	669.5
	0.657	670.5	669.5	670
	0.658	663.5	666	669.5
	0.659	667.5	673	668.5
	0.66	666	669.5	669
	0.661	669.5	669.5	670
	0.662	666.5	669	669
	0.663	666	673.5	670.5
	0.664	669.5	672.5	670
	0.665	668.5	670	671
	0.666	666	671.5	669
	0.667	666	670	667.5
	0.668	668.5	667.5	670
	0.669	666	663	670.5
	0.67	666	676	670
	0.671	669	670.5	670.5
	0.672	667	670.5	672
	0.673	666	669.5	669
	0.674	669	669.5	670
	0.675	667	666	671.5
	0.676	668.5	670.5	672
	0.677	669	671.5	671
	0.678	664	670	669.5
	0.679	668.5	670	668.5
	0.68	666	670	668.5
	0.681	666	673	670
	0.682	668.5	668.5	665.5
	0.683	667.5	672.5	667.5
	0.684	669.5	668.5	672.5
	0.685	670	671.5	670
	0.686	668	666	672
	0.687	669	671	670
	0.688	670.5	670.5	669
	0.689	668	673	668.5
	0.69	669.5	672.5	669
	0.691	668.5	671.5	671.5
	0.692	669.5	672.5	675
	0.693	668.5	671.5	670
	0.694	666	672	670.5
	0.695	668.5	670	671.5
	0.696	668.5	673	670.5
	0.697	669	671.5	672.5
	0.698	671	673	671
	0.699	669	672.5	671.5
	0.7	670	669.5	669
	0.701	668.5	673	671.5
	0.702	669.5	670.5	671.5
	0.703	670.5	670	670
	0.704	671.5	670.5	673
	0.705	667.5	671.5	672.5
	0.706	670	669.5	670
	0.707	670	672.5	670.5
	0.708	668	670	669.5
	0.709	671	673.5	672.5
	0.71	670	671	674.5
	0.711	670	670.5	670
	0.712	669	672.5	670.5
	0.713	670	669	674
	0.714	672	669.5	673.5
	0.715	669.5	670.5	673.5
	0.716	669.5	669	673
	0.717	671.5	671.5	671.5
	0.718	671	671	676
	0.719	672	673	673
	0.72	671.5	665.5	672
	0.721	670	670	673.5
	0.722	668.5	669.5	670
	0.723	670	669.5	672.5
	0.724	670	673.5	673
	0.725	672.5	668.5	677
	0.726	673.5	671.5	674.5
	0.727	672.5	669	677
	0.728	670	669.5	673
	0.729	671.5	670	674.5
	0.73	672	670	670.5
	0.731	668	670	674.5
	0.732	670.5	667.5	671
	0.733	669.5	668.5	674.5
	0.734	671.5	669.5	672
	0.735	670	674	672
	0.736	668.5	671.5	670.5
	0.737	670	666	675
	0.738	669.5	668.5	673.5
	0.739	670.5	668	674
	0.74	668	671.5	673
	0.741	670	670	671.5
	0.742	669	667	675.5
	0.743	671.5	668	671.5
	0.744	670.5	672.5	674.5
	0.745	672	670	675.5
	0.746	670	668	669.5
	0.747	671.5	668	675
	0.748	667.5	669.5	672
	0.749	668	669.5	675.5
	0.75	669	672	671.5
	0.751	670.5	665.5	673
	0.752	669	666	675
	0.753	666	668.5	674.5
	0.754	670.5	668	671
	0.755	670	670.5	673
	0.756	666	669.5	671.5
	0.757	670	671	671
	0.758	672	669	676
	0.759	671.5	668	673
	0.76	670.5	667.5	671.5
	0.761	670	669.5	675.5
	0.762	672	666	671
	0.763	669	669.5	672.5
	0.764	667.5	672	670.5
	0.765	668	668.5	671.5
	0.766	669.5	666	675
	0.767	672.5	667.5	669
	0.768	671.5	669	671
	0.769	669	667.5	675
	0.77	670.5	669.5	672.5
	0.771	674	670	671
	0.772	670.5	667	673
	0.773	671.5	668	670.5
	0.774	670.5	666	672.5
	0.775	670	668	671
	0.776	673	664	673
	0.777	669.5	664.5	670.5
	0.778	670	665	668.5
	0.779	671.5	669	673.5
	0.78	671	666	669
	0.781	667.5	670	669
	0.782	671	666	671
	0.783	672.5	667	672.5
	0.784	667	666.5	672
	0.785	667	664.5	673
	0.786	671	666	671
	0.787	670	666	671.5
	0.788	669	666	671.5
	0.789	672.5	669	674
	0.79	670	664	668.5
	0.791	671.5	669.5	670
	0.792	671	670	669
	0.793	669.5	667.5	669.5
	0.794	669	663.5	670.5
	0.795	670	663	669.5
	0.796	671.5	667	669
	0.797	668	666	670.5
	0.798	668	666	669.5
	0.799	666	668	668
	0.8	670	665	670
	0.801	668.5	671.5	674
	0.802	668	667.5	672.5
	0.803	668	666	671.5
	0.804	671.5	668.5	672.5
	0.805	670	669	672
	0.806	669.5	664.5	669
	0.807	671	664.5	670
	0.808	668	668	670
	0.809	668.5	668.5	671.5
	0.81	670	665	669.5
	0.811	671.5	666	671
	0.812	666	670	670.5
	0.813	666	667.5	669
	0.814	671.5	664.5	669
	0.815	668	667.5	671.5
	0.816	670.5	668	669.5
	0.817	670	663.5	666.5
	0.818	669.5	666	671.5
	0.819	672.5	665.5	670
	0.82	670.5	670	670
	0.821	669	665.5	669.5
	0.822	669.5	667	669
	0.823	671.5	670	671
	0.824	669	666	670
	0.825	671	668	669.5
	0.826	672	666	668
	0.827	673	669.5	668.5
	0.828	670.5	666	670
	0.829	670	668	668
	0.83	670	670	672
	0.831	670	669.5	669
	0.832	670	665	670.5
	0.833	672.5	668.5	669.5
	0.834	673.5	667.5	669
	0.835	670	666	670.5
	0.836	669	666	669.5
	0.837	671	668.5	670.5
	0.838	669.5	665.5	671
	0.839	664.5	670	668.5
	0.84	669	665	669.5
	0.841	667	669	667
	0.842	667.5	670	670
	0.843	670	670.5	670
	0.844	670.5	666	670.5
	0.845	670.5	671	672
	0.846	669	669.5	667
	0.847	671	668	671
	0.848	669	669.5	671
	0.849	671	668	668.5
	0.85	670.5	668.5	669.5
	0.851	670	669	668.5
	0.852	670	667.5	670.5
	0.853	670	671.5	670.5
	0.854	666	669.5	667.5
	0.855	668.5	670.5	668
	0.856	672	668	670.5
	0.857	672.5	669.5	668.5
	0.858	672.5	670	672
	0.859	672.5	669	671.5
	0.86	670	670.5	671
	0.861	670	667.5	671.5
	0.862	671	669.5	668.5
	0.863	669.5	668.5	672
	0.864	671	668	668.5
	0.865	672	670.5	670
	0.866	670.5	670.5	668
	0.867	669	671.5	673
	0.868	673	671.5	671
	0.869	669.5	671	670
	0.87	670	667	668.5
	0.871	672.5	670.5	670
	0.872	672.5	667.5	668
	0.873	672	669	668.5
	0.874	670.5	673	670.5
	0.875	668.5	670	666
	0.876	670	670	670
	0.877	670.5	668.5	669
	0.878	671.5	669.5	668.5
	0.879	672	674.5	666
	0.88	671.5	671.5	670.5
	0.881	670	671	670
	0.882	676	673	670
	0.883	670	672.5	668.5
	0.884	671.5	675.5	670.5
	0.885	670.5	670.5	669
	0.886	670	670	671
	0.887	671.5	674	671.5
	0.888	671.5	668.5	672
	0.889	672	676	668.5
	0.89	668	675	667
	0.891	670	671.5	670
	0.892	673	672.5	672
	0.893	672.5	673	671
	0.894	670.5	673.5	670.5
	0.895	668.5	675	668.5
	0.896	673	671	669
	0.897	667.5	671	670
	0.898	672.5	674	668
	0.899	670	675	670
	0.9	670	676.5	666
	0.901	671.5	671	669.5
	0.902	670.5	672	668.5
	0.903	670	672.5	671.5
	0.904	673	668.5	669.5
	0.905	672	673.5	668
	0.906	671.5	673.5	668.5
	0.907	670.5	672	671
	0.908	670.5	669.5	669
	0.909	670	674	668
	0.91	669	674.5	669.5
	0.911	668	673.5	667.5
	0.912	668	670.5	666
	0.913	672	670	672.5
	0.914	671	674.5	670.5
	0.915	670.5	670.5	671.5
	0.916	668.5	673	670
	0.917	673.5	674	669.5
	0.918	670	672	671.5
	0.919	669.5	674.5	669.5
	0.92	667.5	671.5	670
	0.921	670	670.5	671.5
	0.922	669.5	672.5	670
	0.923	668.5	672	669
	0.924	668	673.5	673.5
	0.925	670.5	673.5	671
	0.926	671	677	668
	0.927	666	673	670
	0.928	666	670	671.5
	0.929	670.5	671	669.5
	0.93	669	673	669.5
	0.931	667.5	672.5	670.5
	0.932	667	670	672.5
	0.933	666	673.5	670.5
	0.934	670	671.5	670
	0.935	666	672.5	670
	0.936	667.5	673	672.5
	0.937	668	671.5	667.5
	0.938	666	674.5	675
	0.939	671	673.5	669
	0.94	667.5	673	670
	0.941	666	671.5	669.5
	0.942	666	670	672.5
	0.943	668.5	672.5	670
	0.944	665.5	667.5	671
	0.945	668.5	669.5	669.5
	0.946	666	672	668.5
	0.947	666	670.5	670
	0.948	666	670	671
	0.949	666	670	670
	0.95	666	670	672.5
	0.951	668.5	675.5	672
	0.952	670	672.5	667.5
	0.953	664.5	672.5	670
	0.954	666.5	670.5	671.5
	0.955	665.5	672	670.5
	0.956	669	671.5	672
	0.957	670	672	672.5
	0.958	670.5	669	672
	0.959	668.5	669	673.5
	0.96	668	670	670
	0.961	667.5	670	669
	0.962	668	668.5	669.5
	0.963	666	671.5	669.5
	0.964	669	670.5	670
	0.965	670	673	673
	0.966	669	671.5	671.5
	0.967	668.5	670.5	669.5
	0.968	669	673	672.5
	0.969	669.5	668.5	672.5
	0.97	667	671.5	668
	0.971	670	673.5	670
	0.972	668	671.5	672.5
	0.973	666	672	672.5
	0.974	669	669.5	669
	0.975	666	671	670.5
	0.976	668.5	670	670
	0.977	670	670.5	671
	0.978	668	669	668.5
	0.979	670	671	670
	0.98	662	670	669
	0.981	668	669.5	673
	0.982	666	670	670.5
	0.983	671.5	670	671.5
	0.984	666	670	671
	0.985	667	671	670.5
	0.986	667.5	671	670
	0.987	670	672.5	671
	0.988	671.5	670	670
	0.989	670.5	670	669
	0.99	668	672.5	672
	0.991	666	672	672.5
	0.992	668	671.5	668.5
	0.993	667.5	673	669
	0.994	670	671.5	670.5
	0.995	667.5	668.5	668.5
	0.996	669.5	669	670
	0.997	670.5	670	669
	0.998	667.5	671	669.5
	0.999	668.5	671	670.5
	1	670	670	670.5
	1.001	667.5	670	670
	1.002	666	672	670.5
	1.003	665.5	672	671.5
	1.004	666	672	669.5
	1.005	669.5	666	669
	1.006	670	669	668
	1.007	666	670	668.5
	1.008	668	672.5	669
	1.009	667	673.5	670
	1.01	666	672.5	670
	1.011	667	668	671.5
	1.012	668.5	670	671
	1.013	668.5	668.5	671.5
	1.014	664	668.5	673
	1.015	670.5	667.5	669
	1.016	671	669	670
	1.017	666	670	670.5
	1.018	670.5	670.5	670
	1.019	670	669.5	669
	1.02	668.5	671.5	670
	1.021	666	667.5	665
	1.022	668.5	671	667.5
	1.023	670	669	665.5
	1.024	670.5	672.5	671.5
	1.025	668	670	672.5
	1.026	670	671.5	668.5
	1.027	670.5	672.5	668.5
	1.028	670	669	668
	1.029	668.5	672	669.5
	1.03	668	670	668
	1.031	670	670	671.5
	1.032	668	670	670
	1.033	670	670	670.5
	1.034	672.5	668.5	666
	1.035	670	669	670
	1.036	666	670	676
	1.037	668	668.5	670.5
	1.038	670.5	670	670
	1.039	673	671.5	669
	1.04	669	673.5	670.5
	1.041	670.5	671	670.5
	1.042	668	668.5	670
	1.043	670.5	669	670
	1.044	670.5	670	673.5
	1.045	671	673	670
	1.046	672	672.5	670.5
	1.047	670	670	669.5
	1.048	674	668.5	668
	1.049	669	667.5	667.5
	1.05	674.5	673	674
	1.051	670	668.5	670.5
	1.052	669	668.5	672.5
	1.053	673	672.5	673.5
	1.054	670.5	672	672
	1.055	669.5	673.5	672
	1.056	671.5	669.5	673.5
	1.057	670	672	669.5
	1.058	670.5	670	675.5
	1.059	672	669.5	673
	1.06	671.5	672	671.5
	1.061	670	670.5	673
	1.062	668.5	673	672.5
	1.063	672.5	670	670.5
	1.064	671	668	670
	1.065	670.5	667.5	671.5
	1.066	671	670	672.5
	1.067	673.5	670	670.5
	1.068	671.5	669.5	671.5
	1.069	673	671.5	668
	1.07	670.5	670.5	671
	1.071	673	669.5	670.5
	1.072	671	670.5	675
	1.073	666	673.5	670.5
	1.074	669.5	667	672
	1.075	669	671	672.5
	1.076	671	670.5	671
	1.077	669	670.5	672.5
	1.078	672.5	668.5	674
	1.079	666.5	673	671.5
	1.08	671.5	670	670
	1.081	669.5	670	672.5
	1.082	670	670.5	671.5
	1.083	669	673.5	670
	1.084	672	671.5	673.5
	1.085	671.5	668.5	671
	1.086	670	666	669
	1.087	673.5	668.5	669.5
	1.088	672.5	670	671
	1.089	671.5	669	672.5
	1.09	668	670	673.5
	1.091	670.5	668.5	671.5
	1.092	670.5	670	675.5
	1.093	675	673.5	673
	1.094	670	668.5	672
	1.095	669	666	673.5
	1.096	670.5	669	674
	1.097	671	670	671.5
	1.098	671.5	666	674
	1.099	670.5	671	670
	1.1	670.5	666	671.5
	1.101	670	670.5	669
	1.102	670.5	667.5	673
	1.103	671.5	669.5	670
	1.104	667.5	671	669.5
	1.105	673	671.5	675
	1.106	669.5	673	670.5
	1.107	673	671	672.5
	1.108	671	669.5	673.5
	1.109	675	668	675
	1.11	667	671	672
	1.111	670.5	671	669.5
	1.112	671.5	670.5	671.5
	1.113	666	674.5	670
	1.114	672	668.5	670
	1.115	669.5	670	671.5
	1.116	672.5	670.5	673.5
	1.117	673.5	671	670
	1.118	667.5	672.5	670
	1.119	669	673	670.5
	1.12	670	670	669.5
	1.121	670	670	672.5
	1.122	668	671.5	671.5
	1.123	671.5	670	670
	1.124	669	669.5	672.5
	1.125	669	671.5	671
	1.126	671	672.5	665.5
	1.127	670	670	668.5
	1.128	669.5	677	667.5
	1.129	671.5	670	670
	1.13	669.5	674	671
	1.131	671.5	671	670
	1.132	670	671.5	671.5
	1.133	669	672	668.5
	1.134	672.5	670	671
	1.135	670.5	672	669
	1.136	670	672.5	672
	1.137	669.5	671.5	670
	1.138	670.5	671.5	669
	1.139	671	671	671.5
	1.14	672	670	669.5
	1.141	665.5	672.5	669.5
	1.142	669	671.5	670.5
	1.143	670	672.5	670
	1.144	668	670	668
	1.145	666	670.5	667.5
	1.146	670	674	668.5
	1.147	670.5	673	670
	1.148	667	672	670.5
	1.149	671.5	673.5	670
	1.15	668	673.5	666
	1.151	668	672.5	672
	1.152	669.5	670	673
	1.153	667.5	673	670
	1.154	670	673.5	671.5
	1.155	669	669	669.5
	1.156	666	671.5	670
	1.157	671.5	670	668.5
	1.158	670.5	669.5	672
	1.159	670	673	671.5
	1.16	669.5	674.5	671.5
	1.161	667.5	672	668.5
	1.162	669	671.5	670.5
	1.163	670	673	669
	1.164	669	670	668.5
	1.165	669	671.5	671
	1.166	667	670.5	672.5
	1.167	668.5	671	669.5
	1.168	668	671.5	671
	1.169	668	670.5	670.5
	1.17	670	671.5	666
	1.171	669.5	670	671.5
	1.172	668.5	669.5	669.5
	1.173	668	670	670.5
	1.174	666	673.5	671
	1.175	670.5	672	671.5
	1.176	665.5	673.5	673.5
	1.177	670.5	672.5	669
	1.178	669	675	670.5
	1.179	669.5	674	670.5
	1.18	666	670	671
	1.181	667	672	670
	1.182	667.5	670	670
	1.183	669	671.5	670.5
	1.184	667.5	671.5	666
	1.185	669	676	672
	1.186	672	670.5	670
	1.187	667.5	670.5	673.5
	1.188	667.5	673.5	672.5
	1.189	668	671.5	670
	1.19	669.5	669	670
	1.191	669.5	669.5	670
	1.192	670	671.5	671
	1.193	666	672.5	669.5
	1.194	670.5	671.5	670
	1.195	666	668.5	672
	1.196	669	671	668
	1.197	671.5	671	671
	1.198	667.5	675	669.5
	1.199	670.5	674	672
	1.2	670	670	669.5
	1.201	669.5	671	671
	1.202	670	670.5	671.5
	1.203	670.5	670.5	670.5
	1.204	671	673	668
	1.205	670	669	670
	1.206	670	667.5	670
	1.207	673	673.5	671
	1.208	667.5	673.5	670.5
	1.209	668	671.5	670
	1.21	665	670	671
	1.211	669.5	669	671.5
	1.212	668.5	675	670
	1.213	670	669	670
	1.214	670	669	669
	1.215	670	672	671
	1.216	670.5	673.5	673
	1.217	666	669.5	671
	1.218	671.5	670	670.5
	1.219	669.5	670	671.5
	1.22	669	670	672.5
	1.221	668.5	673	671
	1.222	671.5	674.5	671.5
	1.223	669.5	672	671.5
	1.224	674	674	671.5
	1.225	672.5	673.5	670
	1.226	670	672	669
	1.227	671	673	675
	1.228	667	671	670
	1.229	670	670.5	670.5
	1.23	673	670	672
	1.231	669.5	672.5	673
	1.232	669.5	666	672
	1.233	670	669.5	675
	1.234	670	671	670
	1.235	671	672.5	672.5
	1.236	669.5	672	672.5
	1.237	667	673.5	673
	1.238	670.5	673.5	676
	1.239	668.5	673.5	670.5
	1.24	669.5	671	674
	1.241	670	669.5	676
	1.242	667.5	669.5	673.5
	1.243	666	671	672.5
	1.244	670	671	675
	1.245	669	670	672
	1.246	670	673	676
	1.247	667	667.5	670.5
	1.248	670	670.5	675.5
	1.249	670	670.5	674.5
	1.25	670	672.5	674
	1.251	667	671.5	673
	1.252	668.5	672	674.5
	1.253	668	669.5	672
	1.254	670	670	673.5
	1.255	670	673	675
	1.256	668	670	669.5
	1.257	670	673.5	673.5
	1.258	669	672	670
	1.259	668.5	677	673.5
	1.26	666	672	676.5
	1.261	670	672.5	675
	1.262	670	669.5	673.5
	1.263	670	672.5	673
	1.264	665.5	670	671.5
	1.265	669.5	669	674.5
	1.266	670	667.5	672.5
	1.267	666	671.5	677
	1.268	671	670.5	672.5
	1.269	668.5	674.5	674.5
	1.27	669	675	674
	1.271	668	673.5	669
	1.272	670	669.5	673.5
	1.273	666	668	672.5
	1.274	668.5	671	671.5
	1.275	669.5	672	674
	1.276	668	670.5	671.5
	1.277	667.5	672	670
	1.278	668	670	671
	1.279	668	670.5	673.5
	1.28	666.5	671.5	672.5
	1.281	665	675.5	674.5
	1.282	668.5	673.5	672.5
	1.283	667	670.5	674
	1.284	667	668.5	672
	1.285	671	672.5	673.5
	1.286	670.5	667.5	672.5
	1.287	666	674.5	676
	1.288	670.5	672	670
	1.289	667.5	673	672
	1.29	668.5	669.5	670
	1.291	668	669	675
	1.292	667.5	673	674
	1.293	666	670	672
	1.294	666	668	670
	1.295	669.5	670.5	674.5
	1.296	665	670	675
	1.297	666	670	671
	1.298	670	669.5	676
	1.299	666	670	675.5
	1.3	667	673	670.5
	1.301	669.5	671	671.5
	1.302	670	669.5	670
	1.303	671	671	672.5
	1.304	669.5	667.5	672
	1.305	669.5	671	675
	1.306	665.5	670	673.5
	1.307	670	671	673.5
	1.308	666	672.5	671
	1.309	670	670	670
	1.31	671.5	670	673.5
	1.311	669.5	670	675
	1.312	671	672	671.5
	1.313	666	669.5	668
	1.314	665.5	670	671
	1.315	669.5	667.5	672.5
	1.316	670.5	671	674.5
	1.317	670	668.5	675
	1.318	670	670	673.5
	1.319	671.5	673.5	677
	1.32	670	669	670
	1.321	673.5	669	673.5
	1.322	672	667.5	674.5
	1.323	671	668	671.5
	1.324	673.5	672.5	672
	1.325	672.5	670	675.5
	1.326	671	669.5	672.5
	1.327	670	666	672
	1.328	673.5	670	674.5
	1.329	671	667.5	671.5
	1.33	670.5	670	672.5
	1.331	675.5	670	671
	1.332	670	669.5	670
	1.333	670.5	668.5	671.5
	1.334	670	668.5	670.5
	1.335	668.5	671	671.5
	1.336	671.5	666	671
	1.337	668	671.5	671.5
	1.338	671.5	670	675
	1.339	671	671	672.5
	1.34	671.5	667.5	673.5
	1.341	671.5	666	671
	1.342	672.5	666	671.5
	1.343	670	671	674
	1.344	670	670	673.5
	1.345	670	669.5	670
	1.346	673	668	671
	1.347	667.5	665.5	669
	1.348	670	670	673.5
	1.349	672	669	674
	1.35	669.5	665	671
	1.351	670.5	670	668
	1.352	675.5	672.5	671
	1.353	672.5	666.5	670
	1.354	670.5	665.5	670
	1.355	669.5	669.5	676.5
	1.356	671.5	668	670.5
	1.357	673	671	670
	1.358	672.5	670	671.5
	1.359	669	668.5	670
	1.36	668	668	672
	1.361	670	667.5	674.5
	1.362	670	669.5	673.5
	1.363	670.5	672	670
	1.364	670	667	670.5
	1.365	669	667	672.5
	1.366	671.5	668.5	671
	1.367	666	668.5	674.5
	1.368	666	670.5	670.5
	1.369	668.5	669.5	671
	1.37	670	669.5	670
	1.371	670	666	670.5
	1.372	671.5	673	669.5
	1.373	670	671	670.5
	1.374	668.5	669.5	670
	1.375	669	671	671.5
	1.376	671	669.5	670.5
	1.377	671.5	669	673.5
	1.378	673	669	672
	1.379	672.5	668	672.5
	1.38	669	671	668
	1.381	671.5	671.5	669
	1.382	669.5	671.5	671.5
	1.383	666	668.5	675
	1.384	670.5	670	670
	1.385	670.5	670.5	673.5
	1.386	667.5	673	669
	1.387	668	670	671.5
	1.388	667.5	671.5	670.5
	1.389	668.5	672	670.5
	1.39	669	670	672.5
	1.391	670	671	674.5
	1.392	670	670.5	671.5
	1.393	666	674	670
	1.394	672	670	669
	1.395	670.5	670	671.5
	1.396	669	674	672
	1.397	672	669.5	673
	1.398	670.5	672	674
	1.399	671	670.5	670.5
	1.4	669	671	669
	1.401	670.5	673.5	670
	1.402	671.5	673.5	673
	1.403	673.5	673.5	670.5
	1.404	671	675.5	670.5
	1.405	670.5	677	669
	1.406	671.5	670	670
	1.407	677	671.5	675.5
	1.408	670	674.5	671
	1.409	668.5	672.5	671.5
	1.41	668	673	670.5
	1.411	667	677.5	672
	1.412	671	672.5	674
	1.413	672.5	674.5	673
	1.414	670.5	671.5	670
	1.415	669.5	673	671.5
	1.416	670.5	673	671.5
	1.417	672	674	677
	1.418	667	673	669.5
	1.419	669	670.5	668.5
	1.42	669.5	673.5	669.5
	1.421	675	671	673.5
	1.422	667	672.5	670.5
	1.423	667	671	668.5
	1.424	674	671	671
	1.425	669	672.5	669
	1.426	670.5	672.5	672
	1.427	672	678.5	670
	1.428	670	674	670
	1.429	668	673.5	671
	1.43	669	673	669
	1.431	668.5	671.5	671.5
	1.432	670.5	676	671
	1.433	666	672	670.5
	1.434	669.5	675.5	671
	1.435	666	673	667
	1.436	666	673.5	670.5
	1.437	670	672.5	672.5
	1.438	669.5	671.5	673.5
	1.439	668	670	666
	1.44	668	669.5	672.5
	1.441	666	673.5	671.5
	1.442	666	672.5	669.5
	1.443	669	674.5	670.5
	1.444	668	671.5	670.5
	1.445	670	669	670
	1.446	666	670	670
	1.447	663.5	674.5	669.5
	1.448	665.5	674	671
	1.449	666	672.5	670
	1.45	670	671.5	670
	1.451	666	667	669.5
	1.452	666	671.5	671.5
	1.453	667	673	671
	1.454	666	669	670
	1.455	665.5	673.5	674.5
	1.456	665	671	672.5
	1.457	665	670.5	674
	1.458	665	674.5	670
	1.459	666.5	672.5	671.5
	1.46	665	670.5	671.5
	1.461	671	672.5	670
	1.462	668	673	671.5
	1.463	669	674.5	673.5
	1.464	664	673	671
	1.465	665	674.5	672
	1.466	666	672.5	672
	1.467	666	672.5	672.5
	1.468	665	675	673.5
	1.469	665.5	671	673
	1.47	664.5	670	671.5
	1.471	670	670.5	673.5
	1.472	666	674	672.5
	1.473	663.5	675	675.5
	1.474	666	671	672
	1.475	669	673.5	674.5
	1.476	666	675	674
	1.477	666	670.5	672
	1.478	664.5	671.5	670
	1.479	666	671	672.5
	1.48	664.5	674	670.5
	1.481	669	672.5	669
	1.482	668.5	672	676
	1.483	669	671.5	671.5
	1.484	669	671	673
	1.485	668.5	670.5	677
	1.486	670	670	672.5
	1.487	666	670	669
	1.488	665.5	671	674.5
	1.489	665.5	670.5	675.5
	1.49	668	671	672.5
	1.491	666	668.5	674
	1.492	668.5	670	675
	1.493	666	670	672.5
	1.494	669.5	671.5	673
	1.495	664	670.5	673.5
	1.496	668.5	670	674
	1.497	668	668	674.5
	1.498	665.5	670.5	672
	1.499	667	669	671.5
	1.5	668.5	671	673
	1.501	670.5	667.5	675.5
	1.502	669	674	672.5
	1.503	666	668.5	675
	1.504	666	671	673.5
	1.505	670.5	672.5	673.5
	1.506	668.5	668	670
	1.507	668	670	673
	1.508	664	670.5	675.5
	1.509	665	666	670
	1.51	664	673.5	674.5
	1.511	666	670.5	677
	1.512	670.5	670	672.5
	1.513	670.5	670	674
	1.514	667.5	671.5	671.5
	1.515	669.5	670.5	673
	1.516	669	669	675.5
	1.517	666.5	666	668.5
	1.518	673	672.5	676
	1.519	667	670	675
	1.52	671	669.5	672.5
	1.521	668	667.5	677
	1.522	667	668	673
	1.523	669	669	674.5
	1.524	670	668	677
	1.525	666	668	674.5
	1.526	668.5	672	676.5
	1.527	666	670	675.5
	1.528	670	670	677
	1.529	670	671.5	673.5
	1.53	669.5	668	678
	1.531	666	666	674.5
	1.532	670	670	675
	1.533	669.5	672	673.5
	1.534	669	670.5	676
	1.535	668	672	675.5
	1.536	669	668.5	676.5
	1.537	671	669.5	674
	1.538	667	674.5	676.5
	1.539	670	669	675
	1.54	670	673.5	677
	1.541	671	672	674
	1.542	669	670.5	673
	1.543	672	672	674.5
	1.544	671	667.5	677
	1.545	671	670	675.5
	1.546	668	669	675.5
	1.547	668.5	668.5	676.5
	1.548	669	670	674.5
	1.549	666	670.5	674.5
	1.55	669	672.5	673
	1.551	671	672	676
	1.552	671	673.5	676
	1.553	672	671.5	676.5
	1.554	669.5	669	677
	1.555	670.5	665	677
	1.556	668.5	668.5	673
	1.557	669	670.5	676
	1.558	670.5	669	677
	1.559	666	670.5	678.5
	1.56	669	671.5	676.5
	1.561	674	671	677
	1.562	670	668	677.5
	1.563	670	666	678
	1.564	675.5	671.5	677
	1.565	670	670.5	677.5
	1.566	672	670	677
	1.567	670.5	668.5	680.5
	1.568	673.5	667.5	676.5
	1.569	672.5	671.5	680
	1.57	670	668.5	675.5
	1.571	672	668.5	676
	1.572	673.5	670	679
	1.573	670	672	677.5
	1.574	672.5	670	680
	1.575	676	668	677
	1.576	668	670.5	679.5
	1.577	673.5	670	678.5
	1.578	670.5	670.5	679.5
	1.579	670	668.5	680.5
	1.58	671.5	670	681
	1.581	670.5	669.5	681
	1.582	673	670	683
	1.583	672.5	669.5	681
	1.584	671	672	681
	1.585	673	671	680.5
	1.586	670	670	681
	1.587	673	669	683.5
	1.588	672	667.5	683.5
	1.589	672.5	671	681
	1.59	670.5	676	684.5
	1.591	674.5	672.5	684
	1.592	673	668	683.5
	1.593	675	669	683
	1.594	671.5	670	684
	1.595	674	669.5	683.5
	1.596	676	670.5	686
	1.597	671.5	669	685
	1.598	674.5	671	686.5
	1.599	670.5	669.5	687.5
	1.6	672.5	669.5	683
	1.601	673.5	668	687.5
	1.602	672.5	670	688.5
	1.603	670	666	685.5
	1.604	673.5	671.5	687.5
	1.605	669	670	684.5
	1.606	673.5	668.5	687
	1.607	672	673.5	686.5
	1.608	675	671.5	686.5
	1.609	673	671	687
	1.61	669	669.5	688
	1.611	671.5	670.5	686.5
	1.612	674	672.5	686.5
	1.613	671.5	668.5	686.5
	1.614	673	665	688.5
	1.615	671	670	686.5
	1.616	670	669	690.5
	1.617	673	668	686
	1.618	670	671.5	685.5
	1.619	669.5	670	685.5
	1.62	670	671.5	687.5
	1.621	670	669.5	686
	1.622	669.5	665.5	685.5
	1.623	670	671.5	684.5
	1.624	671	669	687
	1.625	671.5	671.5	684
	1.626	672	669.5	685
	1.627	670	670	686.5
	1.628	670.5	670.5	685.5
	1.629	671	673.5	686.5
	1.63	672	667	684
	1.631	671	670.5	684
	1.632	668.5	670.5	683
	1.633	670	670	689.5
	1.634	670	670	685.5
	1.635	669.5	671.5	683
	1.636	669	669	686.5
	1.637	668.5	671	685
	1.638	668	670	683
	1.639	671.5	666	681
	1.64	670.5	669.5	685
	1.641	670	670	682.5
	1.642	665	668.5	684
	1.643	671	668	686.5
	1.644	670	668	687
	1.645	671.5	670.5	684
	1.646	670	668.5	683.5
	1.647	670	669	684
	1.648	668	670	681
	1.649	670.5	670	684
	1.65	669	670	685
	1.651	671.5	671	684.5
	1.652	670	668	685.5
	1.653	670.5	668	684.5
	1.654	668.5	672	686
	1.655	668.5	669.5	684
	1.656	670	669.5	689.5
	1.657	668.5	673.5	685.5
	1.658	670	667.5	686.5
	1.659	671	669	685.5
	1.66	672.5	670	688.5
	1.661	671.5	670.5	686
	1.662	672.5	668.5	686.5
	1.663	669.5	672.5	684.5
	1.664	671.5	668.5	686
	1.665	669	671	683.5
	1.666	669	670	685
	1.667	674	669	684
	1.668	668.5	668.5	686.5
	1.669	667.5	670	684
	1.67	669.5	668.5	689.5
	1.671	669.5	668.5	687.5
	1.672	671.5	670.5	688
	1.673	672	670	686.5
	1.674	669.5	669.5	686.5
	1.675	672	670	683
	1.676	669.5	670	683
	1.677	672.5	670	687.5
	1.678	670	671	684
	1.679	671.5	667.5	686.5
	1.68	673.5	669.5	683.5
	1.681	672	670	682
	1.682	670	670	684
	1.683	672	669.5	684
	1.684	673.5	670	687
	1.685	670.5	668.5	684
	1.686	671.5	671.5	686.5
	1.687	672.5	669	684.5
	1.688	669	670.5	681
	1.689	672.5	669.5	684.5
	1.69	671	666	681
	1.691	670	670	685
	1.692	672	672.5	684.5
	1.693	676	668	683.5
	1.694	672.5	667.5	683.5
	1.695	675	670	683.5
	1.696	675.5	669	683.5
	1.697	670	670.5	680
	1.698	672.5	669	686
	1.699	672.5	667.5	685
	1.7	673.5	668	685
	1.701	676	667	684
	1.702	674	664	684
	1.703	672.5	668.5	681
	1.704	678.5	670	684
	1.705	674.5	663	679
	1.706	674.5	669	680.5
	1.707	673.5	665	680.5
	1.708	673	663.5	680.5
	1.709	678	666	680
	1.71	678	667.5	681
	1.711	671.5	669	680
	1.712	677	670	681
	1.713	675.5	672.5	679
	1.714	675.5	670.5	678.5
	1.715	677	667.5	679
	1.716	678	667.5	677
	1.717	677	670	679.5
	1.718	677	668.5	680
	1.719	674.5	669	679.5
	1.72	673.5	666	677.5
	1.721	674.5	667.5	680
	1.722	675.5	670	680
	1.723	678	669.5	678
	1.724	676.5	670	678
	1.725	677	670	677
	1.726	678	668.5	673
	1.727	680	667	673.5
	1.728	676.5	670.5	676.5
	1.729	677	671	674
	1.73	678.5	671	678.5
	1.731	680	669.5	677
	1.732	680.5	669.5	675.5
	1.733	678.5	672.5	675.5
	1.734	677	670	671
	1.735	677.5	671.5	676
	1.736	679.5	668	675
	1.737	677.5	670	677
	1.738	681	667.5	674.5
	1.739	677.5	672	673.5
	1.74	676.5	668	675
	1.741	678	669.5	678
	1.742	679	671	673.5
	1.743	674	669.5	671.5
	1.744	680.5	670	673.5
	1.745	677	670.5	672
	1.746	675.5	669.5	673.5
	1.747	673.5	668.5	671.5
	1.748	680	672.5	671.5
	1.749	681	670.5	670.5
	1.75	679	670.5	675
	1.751	681	673	672
	1.752	680	671	669.5
	1.753	681	670	672.5
	1.754	684	671	671.5
	1.755	678	669	670
	1.756	683.5	675	672
	1.757	680.5	671.5	672.5
	1.758	680.5	669.5	670.5
	1.759	681	670.5	673
	1.76	684	671	669.5
	1.761	684	672	669.5
	1.762	681	671.5	668.5
	1.763	683.5	672	669.5
	1.764	680	672.5	670
	1.765	681	671	670
	1.766	679.5	670	669
	1.767	681	671.5	673.5
	1.768	683	671	666
	1.769	679	670.5	666
	1.77	686	669.5	668.5
	1.771	684.5	669.5	668.5
	1.772	681	670	666
	1.773	681	671	668
	1.774	681	670.5	668
	1.775	683	669	667.5
	1.776	681	670	665
	1.777	683.5	666	670
	1.778	683.5	669	666
	1.779	685	668	666
	1.78	683	670.5	664
	1.781	687	668.5	663.5
	1.782	685.5	667.5	667.5
	1.783	685	668	666
	1.784	688	667.5	664
	1.785	684.5	670	661.5
	1.786	686.5	671	664
	1.787	688.5	671	663
	1.788	683	665	662.5
	1.789	687.5	672	663.5
	1.79	687	670	663.5
	1.791	688.5	670	668
	1.792	690.5	670	664.5
	1.793	688.5	670	663
	1.794	687	669.5	661
	1.795	688.5	670.5	662
	1.796	689.5	668.5	660
	1.797	689.5	670	663.5
	1.798	688.5	664.5	663
	1.799	688.5	670	662.5
	1.8	687	669	658.5
	1.801	690.5	667.5	661
	1.802	687.5	671	657.5
	1.803	689.5	668	657
	1.804	687.5	673	660.5
	1.805	688.5	666	658.5
	1.806	690	668.5	660
	1.807	694.5	667.5	658
	1.808	688.5	668	659.5
	1.809	690.5	664	658.5
	1.81	690.5	669.5	656
	1.811	690.5	667.5	660
	1.812	692.5	670.5	654.5
	1.813	689.5	668.5	654
	1.814	690.5	672	657
	1.815	694.5	669.5	651
	1.816	690.5	669	655.5
	1.817	690	666	656.5
	1.818	691	670	655
	1.819	692.5	666.5	654
	1.82	688.5	668.5	651
	1.821	693	670	651
	1.822	691.5	671.5	648
	1.823	693	665.5	653.5
	1.824	689.5	664.5	651
	1.825	691.5	668.5	651
	1.826	695.5	668.5	651
	1.827	692.5	668	651
	1.828	692	667.5	650.5
	1.829	694	668	648.5
	1.83	690.5	670.5	645.5
	1.831	692	669	650.5
	1.832	693.5	666	650
	1.833	689	666	645.5
	1.834	692	669	646
	1.835	692	669	643.5
	1.836	696	668	642
	1.837	693.5	670	643
	1.838	690	670	644
	1.839	693	671.5	641.5
	1.84	691	669	642
	1.841	695	670	638
	1.842	690	670.5	641
	1.843	691	671.5	641.5
	1.844	689.5	669.5	638.5
	1.845	692.5	671.5	636
	1.846	690.5	671	637.5
	1.847	688.5	670.5	634
	1.848	691	669.5	634.5
	1.849	690.5	668	635.5
	1.85	692.5	671	635.5
	1.851	690	671.5	637
	1.852	690.5	668	636
	1.853	686.5	671.5	632
	1.854	693	670.5	632
	1.855	692	673.5	630.5
	1.856	689	673	630.5
	1.857	693	670.5	631.5
	1.858	691	669.5	628
	1.859	691	670	628.5
	1.86	690	673	627
	1.861	689.5	670.5	627
	1.862	691.5	670	627
	1.863	688	673.5	626.5
	1.864	692	671.5	627.5
	1.865	689	673.5	628.5
	1.866	686.5	671.5	624.5
	1.867	689.5	673	625.5
	1.868	688.5	671	621.5
	1.869	690.5	669	626.5
	1.87	687	673.5	621.5
	1.871	690.5	672.5	623
	1.872	690.5	669.5	618.5
	1.873	685.5	672	623
	1.874	686	671.5	619.5
	1.875	690.5	672	615.5
	1.876	687.5	670	616.5
	1.877	684	670.5	617.5
	1.878	683.5	670	615.5
	1.879	684.5	671	615
	1.88	683.5	669.5	611.5
	1.881	681	672	614.5
	1.882	687.5	673	612.5
	1.883	681	671	614.5
	1.884	684	669	609.5
	1.885	681	672.5	606.5
	1.886	683.5	672	606.5
	1.887	681	671	609
	1.888	681	670.5	609.5
	1.889	683	671.5	608.5
	1.89	683	673	606.5
	1.891	681	670	605
	1.892	684.5	671.5	603.5
	1.893	680.5	672.5	601.5
	1.894	680	670	601
	1.895	681	669.5	596.5
	1.896	683.5	667.5	598.5
	1.897	679	671.5	596
	1.898	680	668	595
	1.899	681	673.5	594.5
	1.9	677	670.5	593.5
	1.901	681	672	591.5
	1.902	683.5	671	590
	1.903	676.5	673	588
	1.904	677.5	671	588.5
	1.905	677	673	588
	1.906	676	670	586
	1.907	677	669	582.5
	1.908	675	671	583
	1.909	674.5	671.5	579
	1.91	678	670	578.5
	1.911	676	670	578.5
	1.912	676.5	672.5	574.5
	1.913	676.5	673	574.5
	1.914	673.5	671.5	571.5
	1.915	673	669	572.5
	1.916	672	671	567
	1.917	673	674	565
	1.918	673	670	561.5
	1.919	674	672.5	560.5
	1.92	673.5	675.5	560.5
	1.921	669.5	670	557
	1.922	668	670.5	555.5
	1.923	669.5	669	552.5
	1.924	669.5	671.5	550.5
	1.925	670	671.5	547.5
	1.926	668.5	675	543
	1.927	668	670	543
	1.928	669	673.5	539.5
	1.929	666	671.5	535.5
	1.93	668.5	671	535
	1.931	666	672	531
	1.932	668.5	670.5	524.5
	1.933	667	673.5	526.5
	1.934	663.5	673.5	522.5
	1.935	666	672.5	519
	1.936	664	672.5	516
	1.937	663.5	673	513.5
	1.938	663	670.5	509.5
	1.939	662.5	675	504
	1.94	662	671.5	504
	1.941	664	668.5	500.5
	1.942	660.5	672.5	497
	1.943	665.5	676.5	493.5
	1.944	660.5	674.5	488
	1.945	662	678.5	490
	1.946	663.5	673.5	480
	1.947	662	676	482.5
	1.948	656.5	670	478
	1.949	661	675.5	473.5
	1.95	658.5	678	471
	1.951	659.5	676.5	466
	1.952	659.5	672.5	467.5
	1.953	656.5	676.5	459
	1.954	659	677.5	455
	1.955	661	679.5	451
	1.956	660.5	678.5	449
	1.957	656.5	676	445.5
	1.958	658	676.5	442.5
	1.959	657	677	437.5
	1.96	657	676.5	436.5
	1.961	656	677	436
	1.962	657.5	675.5	430.5
	1.963	660	675.5	431.5
	1.964	658.5	677	429
	1.965	658.5	674.5	424
	1.966	657.5	675	419.5
	1.967	657.5	674.5	415.5
	1.968	656.5	675.5	410.5
	1.969	656.5	673.5	412
	1.97	656	677	407
	1.971	651	673.5	407.5
	1.972	655.5	676.5	401
	1.973	656.5	679	402.5
	1.974	655.5	677.5	395
	1.975	651	677	397.5
	1.976	656	673.5	394
	1.977	656.5	678.5	389.5
	1.978	654.5	676.5	390.5
	1.979	651	677.5	386.5
	1.98	655.5	677	385.5
	1.981	654.5	672	382.5
	1.982	655	681	384.5
	1.983	651	674.5	383
	1.984	655.5	678	383
	1.985	652.5	678.5	377
	1.986	651	677	382
	1.987	650.5	678.5	377
	1.988	650.5	679	381
	1.989	650	678	378
	1.99	649.5	678.5	379
	1.991	650	675.5	377
	1.992	648.5	677	376.5
	1.993	649.5	677	375.5
[truncated: 13,006 more rows]

## Sheet: H
DataTypeVer2.0	Time	Fz	Fz	Fz
NumberOfData		8000	8000	8000
PreTriggerData		0	0	0
SamplingTime[ms]		1	1	1
DataLabel		W1:CMJ	W2:CMJ	W3:CMJ
DataUnit	sec	N	N	N
	0	617	619	616.5
	0.001	617	620	615
	0.002	621.5	620	617
	0.003	620	617	614.5
	0.004	619	619	620.5
	0.005	617	615.5	616
	0.006	617	617	617
	0.007	617	620.5	620.5
	0.008	619.5	617	615.5
	0.009	620	616.5	621.5
	0.01	622	616	619.5
	0.011	617	617	621
	0.012	619.5	617	615.5
	0.013	619	617	622
	0.014	619	619	622
	0.015	618.5	617	621
	0.016	615	617	621
	0.017	617	617	619.5
	0.018	617	619.5	624.5
	0.019	619.5	621	622.5
	0.02	619	616	621
	0.021	621	615.5	622
	0.022	622	615.5	622
	0.023	617	617	621
	0.024	620	618.5	624.5
	0.025	617	617	622
	0.026	620	619	623
	0.027	622.5	617	624
	0.028	619.5	617	622.5
	0.029	619.5	621	622.5
	0.03	622.5	615.5	622
	0.031	619.5	619.5	622.5
	0.032	621.5	621.5	625.5
	0.033	617	617	624
	0.034	617	618.5	626.5
	0.035	622	622	622
	0.036	623.5	617	622
	0.037	622	617	622
	0.038	624	623	628
	0.039	620.5	617	624
	0.04	621.5	619.5	626
	0.041	623.5	616.5	623.5
	0.042	625.5	620	626
	0.043	626.5	620.5	627
	0.044	622	620	625.5
	0.045	623.5	619	625.5
	0.046	622	618	625.5
	0.047	627	623	626
	0.048	626.5	623	624
	0.049	627	621	627
	0.05	627.5	623.5	624.5
	0.051	627.5	622.5	626
	0.052	625.5	622.5	623.5
	0.053	627	617	624.5
	0.054	624	621.5	622.5
	0.055	627	622.5	624.5
	0.056	624.5	624	625.5
	0.057	628	622.5	622.5
	0.058	622.5	624	623.5
	0.059	624.5	623.5	624.5
	0.06	628.5	623.5	622.5
	0.061	622	621.5	622.5
	0.062	626.5	622.5	622
	0.063	627.5	622	624
	0.064	626	624	620.5
	0.065	627.5	624.5	620.5
	0.066	628	624.5	622
	0.067	628.5	626	622
	0.068	629	624.5	623.5
	0.069	628.5	625.5	621
	0.07	627	624	625.5
	0.071	626	625	622
	0.072	631	623	622.5
	0.073	629	625	622.5
	0.074	626.5	624.5	620
	0.075	626.5	626.5	621
	0.076	628.5	623.5	617
	0.077	625	624	621.5
	0.078	627.5	623.5	622.5
	0.079	631	625.5	619.5
	0.08	628	626	617
	0.081	628.5	627	617
	0.082	628	625.5	619.5
	0.083	630	624.5	619
	0.084	627.5	625.5	622
	0.085	627.5	623	622
	0.086	632	624	622.5
	0.087	629.5	625.5	621
	0.088	629	628.5	621
	0.089	628	629	619
	0.09	628.5	625	622.5
	0.091	627.5	626.5	617
	0.092	630	623	617
	0.093	629	624	621
	0.094	627.5	622.5	617
	0.095	632	622	619.5
	0.096	627	621	617
	0.097	631	624.5	617
	0.098	629	626.5	619
	0.099	628	621	620
	0.1	632	623	617
	0.101	628.5	626.5	619.5
	0.102	632	622.5	622
	0.103	630	625.5	622
	0.104	630	623.5	622.5
	0.105	629	623.5	619
	0.106	627.5	623.5	619.5
	0.107	629.5	617	619
	0.108	632	624	616
	0.109	629	622	621.5
	0.11	631.5	624.5	617
	0.111	630	627	617
	0.112	626.5	623	620.5
	0.113	632	622.5	619.5
	0.114	631	624	619
	0.115	628.5	622.5	617
	0.116	630.5	622	621.5
	0.117	629.5	623.5	617
	0.118	628	623	619.5
	0.119	628.5	622.5	622
	0.12	631	621	620.5
	0.121	629.5	623	619.5
	0.122	630.5	621.5	617
	0.123	631	622	621
	0.124	628	622	617
	0.125	629.5	620	617
	0.126	628.5	623	621
	0.127	628	623	620.5
	0.128	629	620	619.5
	0.129	624.5	621	621.5
	0.13	626.5	619	621
	0.131	626	623	622
	0.132	628	616	622
	0.133	624.5	615.5	623
	0.134	623.5	617	621
	0.135	629	622	622.5
	0.136	621	622	627
	0.137	625.5	621.5	622
	0.138	623	620.5	621
	0.139	623.5	621.5	621
	0.14	623.5	620.5	622
	0.141	626	619	623
	0.142	623	622	622.5
	0.143	624.5	619.5	624
	0.144	623	620	621
	0.145	623.5	617	619
	0.146	623.5	622.5	622
	0.147	622	617	624
	0.148	624.5	615.5	624.5
	0.149	622	622	621.5
	0.15	622	622	622
	0.151	621.5	621	624.5
	0.152	623	623	622.5
	0.153	622.5	622.5	622
	0.154	623.5	619	622.5
	0.155	622	622	621.5
	0.156	620	622	620
	0.157	621	621	620.5
	0.158	624.5	623.5	621
	0.159	623.5	620.5	624.5
	0.16	623.5	623.5	621
	0.161	624.5	624.5	623.5
	0.162	619.5	624.5	620.5
	0.163	622.5	623.5	622
	0.164	626	623.5	617
	0.165	624	624	621.5
	0.166	624	622	624.5
	0.167	622.5	621	623.5
	0.168	625	621	621
	0.169	621	626.5	620.5
	0.17	622.5	623.5	619.5
	0.171	623	627	622
	0.172	623.5	623.5	621.5
	0.173	622.5	627.5	619
	0.174	622.5	621.5	620.5
	0.175	623	620.5	622.5
	0.176	624.5	624	617
	0.177	623.5	622	621
	0.178	624	622	620
	0.179	626.5	624	622.5
	0.18	626.5	624	619.5
	0.181	624.5	623.5	620.5
	0.182	621.5	624.5	617
	0.183	626	622	621
	0.184	623	623.5	621.5
	0.185	624	625	622.5
	0.186	626.5	622	621.5
	0.187	623	625.5	620.5
	0.188	624	622	623
	0.189	624.5	624	622.5
	0.19	624	621	620
	0.191	627	620	622.5
	0.192	624	622	620
	0.193	623	621	622
	0.194	624	623.5	619.5
	0.195	626.5	621	621
	0.196	624	622.5	621
	0.197	628.5	621	616.5
	0.198	622.5	619.5	624.5
	0.199	623.5	627.5	620.5
	0.2	626.5	622.5	622
	0.201	626	621	619
	0.202	625	623	619
	0.203	626	620.5	622.5
	0.204	625	619	622
	0.205	625	624.5	624
	0.206	624	619.5	622
	0.207	626.5	615.5	622
	0.208	629.5	621.5	623
	0.209	628	622.5	621.5
	0.21	627.5	617	621
	0.211	627.5	622	622
	0.212	628.5	617	624.5
	0.213	625.5	621	625
	0.214	628.5	620	619.5
	0.215	627.5	619	621
	0.216	627	619	622
	0.217	624.5	621.5	623
	0.218	627	617	622
	0.219	627.5	619.5	621
	0.22	626	619.5	625
	0.221	630	622	624.5
	0.222	630	620	623.5
	0.223	626.5	621	624
	0.224	628	619.5	625.5
	0.225	627.5	618.5	622
	0.226	626.5	619.5	621.5
	0.227	629	621	624
	0.228	626.5	622	623.5
	0.229	626	619.5	628
	0.23	624.5	617	624
	0.231	627	617	624.5
	0.232	628.5	619.5	622
	0.233	632	617	622.5
	0.234	628	617	627.5
	0.235	627	616	622.5
	0.236	625.5	619	623
	0.237	625	620.5	626
	0.238	625.5	619.5	622
	0.239	630	620.5	623
	0.24	627	623.5	626.5
	0.241	626	620	624.5
	0.242	628	620.5	627
	0.243	627.5	617	624.5
	0.244	628	620.5	622
	0.245	625	621	622
	0.246	626.5	621	623.5
	0.247	628.5	621	621
	0.248	627	617	625
	0.249	625.5	617	624.5
	0.25	626.5	619.5	621.5
	0.251	624.5	623	622
	0.252	626.5	622.5	626.5
	0.253	628	622	622.5
	0.254	624.5	621.5	623.5
	0.255	628	623	624
	0.256	623	621	622
	0.257	627	621	623.5
	0.258	623	621.5	623
	0.259	625.5	624	622
	0.26	624.5	624.5	622
	0.261	625	623	624
	0.262	624.5	622.5	622.5
	0.263	627	625.5	622
	0.264	629	624	624
	0.265	627	624.5	625
	0.266	628.5	624.5	622
	0.267	625	625.5	622
	0.268	625.5	623	622
	0.269	628	628.5	618.5
	0.27	625.5	625.5	619.5
	0.271	628	627	619.5
	0.272	628	624.5	622.5
	0.273	625.5	624	622
	0.274	631	622.5	622.5
	0.275	627	629	622.5
	0.276	627.5	622.5	622
	0.277	628.5	626	623.5
	0.278	626.5	627.5	617
	0.279	626.5	624.5	617
	0.28	626	626	619
	0.281	626	623	619.5
	0.282	626.5	627	621.5
	0.283	626	626	616
	0.284	624.5	625	617
	0.285	623.5	626	620
	0.286	623	629	620.5
	0.287	629	627	617
	0.288	626.5	627.5	622
	0.289	629	626.5	620
	0.29	624.5	627.5	620
	0.291	627	625.5	620
	0.292	626.5	623.5	622.5
	0.293	625.5	628.5	621
	0.294	624.5	625	620.5
	0.295	622.5	622.5	621.5
	0.296	625	627	621
	0.297	625.5	628.5	622.5
	0.298	623	625.5	619.5
	0.299	630	626.5	621
	0.3	625.5	627.5	619
	0.301	625.5	626	621
	0.302	626	627.5	620
	0.303	627.5	625.5	617
	0.304	626	628	620
	0.305	628.5	623.5	622
	0.306	628	624.5	620.5
	0.307	627.5	622	622.5
	0.308	626	625	619
	0.309	624.5	624.5	621
	0.31	626.5	624.5	622
	0.311	627.5	623.5	618.5
	0.312	626.5	622	620
	0.313	625	625.5	622.5
	0.314	627	622.5	621.5
	0.315	626	626.5	623
	0.316	623	623	620
	0.317	625	617	620.5
	0.318	629.5	621.5	619.5
	0.319	628.5	622.5	617
	0.32	625.5	617	622
	0.321	624	618.5	617
	0.322	628	619.5	622.5
	0.323	628	617	623.5
	0.324	624	620	622
	0.325	628.5	622.5	621
	0.326	626	620.5	624
	0.327	626.5	617	623
	0.328	625	616.5	620.5
	0.329	624.5	620.5	622
	0.33	626.5	620	623.5
	0.331	625.5	621	624
	0.332	627.5	617	622
	0.333	623	620	623.5
	0.334	626.5	620	623
	0.335	625.5	616	622
	0.336	628.5	620	622
	0.337	624	616	624
	0.338	628	619.5	621
	0.339	628	618.5	625
	0.34	628.5	616	621
	0.341	626.5	615	619.5
	0.342	626	617	622
	0.343	626	617	623
	0.344	624.5	620	624.5
	0.345	624.5	621	620
	0.346	627	616.5	620
	0.347	624	618.5	622.5
	0.348	624.5	619.5	621
	0.349	628.5	621	622
	0.35	627	621	621
	0.351	628.5	621	621
	0.352	627.5	619	621
	0.353	627.5	619	620.5
	0.354	626	614	623
	0.355	628.5	622	622
	0.356	628.5	620	622
	0.357	628	621	622.5
	0.358	627.5	621.5	622
	0.359	623.5	620.5	617
	0.36	624.5	621.5	622.5
	0.361	627	619	621
	0.362	623.5	622	619
	0.363	626.5	622.5	620
	0.364	626	627.5	621
	0.365	626.5	622	622
	0.366	624.5	624	617
	0.367	625.5	622	622
	0.368	625.5	626.5	617
	0.369	626.5	624.5	617
	0.37	625	626.5	622
	0.371	626	621.5	620
	0.372	625	623.5	620.5
	0.373	623	625.5	617
	0.374	625.5	622	619
	0.375	626	625.5	617
	0.376	622.5	629	617
	0.377	624.5	627.5	620
	0.378	627	627.5	619
	0.379	627	628.5	617
	0.38	625.5	627	620
	0.381	623	629	616.5
	0.382	625	624	620
	0.383	625.5	625	617
	0.384	624	626.5	615.5
	0.385	622.5	629	617
	0.386	622.5	628.5	617
	0.387	623.5	625.5	617
	0.388	626	628.5	617
	0.389	626.5	627.5	619
	0.39	627	627	616
	0.391	624.5	632	617
	0.392	624	629	615.5
	0.393	622	627.5	620
	0.394	625.5	628.5	618.5
	0.395	622.5	629.5	617
	0.396	626.5	630.5	618.5
	0.397	624	629	616.5
	0.398	622.5	629.5	617
	0.399	620.5	628	617
	0.4	621	628.5	617
	0.401	622	627.5	615.5
	0.402	622	629	615.5
	0.403	622	628.5	617
	0.404	620.5	626	617
	0.405	622.5	628.5	616.5
	0.406	622.5	627	615
	0.407	620.5	627.5	615.5
	0.408	622	628.5	617
	0.409	621	629.5	615.5
	0.41	619.5	627.5	617
	0.411	622.5	628	619.5
	0.412	620.5	629	617
	0.413	624.5	626.5	616.5
	0.414	621.5	630.5	617
	0.415	620	622	616
	0.416	617	626	617
	0.417	620.5	630	618.5
	0.418	621	625	614
	0.419	620.5	621	616
	0.42	619.5	626	618.5
	0.421	620	626.5	617
	0.422	622.5	622.5	619
	0.423	621	624.5	621
	0.424	622	622.5	619
	0.425	621.5	623	621.5
	0.426	621.5	624	617
	0.427	617	624	618.5
	0.428	623	626	617
	0.429	625	624.5	615.5
	0.43	617	622.5	620
	0.431	617	622	617
	0.432	619.5	621.5	617
	0.433	621	621	622
	0.434	620	621	621
	0.435	618.5	619.5	617
	0.436	622.5	622.5	622.5
	0.437	622.5	621	617
	0.438	623.5	623.5	620.5
	0.439	622	619	617
	0.44	620	625	619.5
	0.441	623.5	620.5	620.5
	0.442	620.5	622.5	621
	0.443	622	619.5	617
	0.444	619.5	620.5	620.5
	0.445	622	622	619
	0.446	617	621	622
	0.447	622.5	622	621
	0.448	620.5	621.5	622
	0.449	622	617	623.5
	0.45	622.5	621.5	621.5
	0.451	622.5	618.5	621
	0.452	622.5	619.5	620.5
	0.453	622	617	624.5
	0.454	621.5	618.5	619.5
	0.455	622	621	622.5
	0.456	624.5	617	622
	0.457	622	621.5	620
	0.458	624.5	620.5	619
	0.459	626.5	617	622
	0.46	620.5	619.5	622
	0.461	622	620	621
	0.462	623	621	619
	0.463	627.5	617	622
	0.464	624.5	618.5	622
	0.465	626	622	617
	0.466	621	619	617
	0.467	625	622	623
	0.468	622	617	624.5
	0.469	621	622	623
	0.47	626	617	625.5
	0.471	622	617	622
	0.472	621.5	619	624
	0.473	621	622	623
	0.474	623	619.5	622
	0.475	624.5	619	625.5
	0.476	626	621.5	623
	0.477	624.5	621	622
	0.478	624.5	623.5	622
	0.479	623	622	626.5
	0.48	624	622.5	623
	0.481	624.5	623	622.5
	0.482	623	624.5	625.5
	0.483	626	623	625
	0.484	624	619.5	624.5
	0.485	622.5	622.5	622
	0.486	624	623.5	623.5
	0.487	622.5	625	622
	0.488	624.5	622	624.5
	0.489	623.5	622.5	622
	0.49	625.5	626.5	622.5
	0.491	624.5	626	624
	0.492	623	629	622.5
	0.493	623.5	627	622
	0.494	624.5	627.5	622
	0.495	622	626.5	623.5
	0.496	622	630.5	622
	0.497	622.5	624.5	623.5
	0.498	621.5	627	622.5
	0.499	622	629.5	622.5
	0.5	623	625.5	622
	0.501	619	624.5	624.5
	0.502	620.5	623.5	622.5
	0.503	622	626.5	623.5
	0.504	622	627.5	624.5
	0.505	622.5	630	620.5
	0.506	622	629.5	624
	0.507	622.5	624	624.5
	0.508	625.5	627.5	624.5
	0.509	622	623.5	621.5
	0.51	622.5	623.5	622
	0.511	623	628.5	624
	0.512	623	625.5	619.5
	0.513	621	628	622
	0.514	621	628	619.5
	0.515	617	627	622
	0.516	622	630	620.5
	0.517	621	624.5	623
	0.518	619.5	623	623
	0.519	622	627.5	620.5
	0.52	622	627.5	617
	0.521	619.5	628.5	622
	0.522	622	629.5	619
	0.523	619.5	626.5	623
	0.524	621	623.5	622.5
	0.525	623.5	624.5	621
	0.526	623.5	628	620.5
	0.527	622	627	622
	0.528	623	624	621.5
	0.529	617	622	623
	0.53	621	625	621.5
	0.531	622.5	624.5	619
	0.532	620.5	623.5	622
	0.533	620.5	622.5	622.5
	0.534	620	622	622
	0.535	622	623.5	616.5
	0.536	626	622	620.5
	0.537	623	622.5	623.5
	0.538	623	622	617
	0.539	620	621	621
	0.54	624	623	619.5
	0.541	622	620.5	621.5
	0.542	629	622	617
	0.543	625	620	617
	0.544	623.5	620.5	615.5
	0.545	623.5	617	622
	0.546	630	624	619
	0.547	626	621.5	621
	0.548	623.5	617	620
	0.549	631	621.5	622
	0.55	627.5	619.5	620.5
	0.551	629	620	617
	0.552	629	620.5	620.5
	0.553	631	619.5	620.5
	0.554	630	622	621
	0.555	629	617	619
	0.556	626.5	621	620
	0.557	627.5	620	622
	0.558	630.5	620.5	620
	0.559	631	620	617
	0.56	629	619	619.5
	0.561	631	620	619.5
	0.562	631.5	619.5	617
	0.563	634	619.5	616.5
	0.564	630.5	621.5	617
	0.565	630.5	621	620.5
	0.566	628.5	620	622.5
	0.567	630	617	621
	0.568	632	624.5	621.5
	0.569	632	620.5	622
	0.57	630	622	623
	0.571	632	622.5	617
	0.572	632	620	616.5
	0.573	630	622	622
	0.574	630.5	617	620.5
	0.575	632	621	620.5
	0.576	633.5	621	619.5
	0.577	631	624.5	622
	0.578	629	621	621.5
	0.579	631.5	624	617
	0.58	629	623.5	619.5
	0.581	631	625	617
	0.582	631.5	625	617
	0.583	625	627	617
	0.584	630	626	619
	0.585	629	626	617
	0.586	630.5	625	617
	0.587	628.5	625.5	617
	0.588	628	625	617
	0.589	628.5	627.5	617
	0.59	626.5	627.5	620
	0.591	628	624	617
	0.592	627.5	627	617
	0.593	625.5	626	617
	0.594	624.5	629	615.5
	0.595	627	623.5	616.5
	0.596	624	628.5	615.5
	0.597	625.5	627.5	616
	0.598	627.5	624.5	614.5
	0.599	627.5	625.5	614.5
	0.6	624.5	627	615.5
	0.601	627.5	626	621.5
	0.602	622.5	625.5	617
	0.603	626	628.5	617
	0.604	624.5	627	621
	0.605	622	627.5	616.5
	0.606	623.5	628	619
	0.607	623.5	624.5	615.5
	0.608	622	627.5	619
	0.609	622	627.5	617
	0.61	622	625.5	619.5
	0.611	623.5	624.5	616
	0.612	621	624.5	617
	0.613	621	624.5	616.5
	0.614	620.5	624	614
	0.615	617	629	617
	0.616	622	623.5	616
	0.617	619	622	620
	0.618	617	624.5	617
	0.619	618.5	621	618.5
	0.62	621.5	620	620
	0.621	621	626.5	617
	0.622	617	620	619
	0.623	616	626.5	617
	0.624	617	622	620
	0.625	617	624	620
	0.626	616.5	622	620
	0.627	621	624.5	617
	0.628	619	617	617
	0.629	619.5	620	621
	0.63	616.5	621.5	619.5
	0.631	617	617	619.5
	0.632	621	619.5	621.5
	0.633	619	614.5	619
	0.634	619	620	622.5
	0.635	617	619	617
	0.636	617	619	623
	0.637	617	616.5	622
	0.638	620	615.5	619
	0.639	620	617	622
	0.64	618	617	618
	0.641	617	616	620
	0.642	621.5	615.5	622
	0.643	622	616.5	620.5
	0.644	617	615.5	622.5
	0.645	617	617	622
	0.646	621.5	616	623.5
	0.647	619	615	620.5
	0.648	622	615	621
	0.649	622	613	622.5
	0.65	623.5	613	622.5
	0.651	621	613.5	619
	0.652	620	612.5	622.5
	0.653	624	611.5	625
	0.654	622.5	611.5	624.5
	0.655	622	613	626.5
	0.656	624.5	609.5	622.5
	0.657	626.5	610.5	622.5
	0.658	624.5	609	623.5
	0.659	621.5	609	621
	0.66	625	611.5	622.5
	0.661	621	610.5	622
	0.662	621.5	609.5	623
	0.663	622	613	622.5
	0.664	625.5	612.5	622
	0.665	620	609	622.5
	0.666	622	610	621
	0.667	626.5	610.5	621.5
	0.668	622	613	621
	0.669	623.5	611.5	622
	0.67	621.5	610.5	628
	0.671	626	611.5	623.5
	0.672	625.5	612	623
	0.673	629	613	623
	0.674	626.5	609.5	619.5
	0.675	624	611.5	623.5
	0.676	622	611.5	625
	0.677	624	611	624.5
	0.678	624	610	620
	0.679	626	610	621
	0.68	623.5	611.5	624
	0.681	622.5	612.5	623
	0.682	627	608.5	621.5
	0.683	623	610	623.5
	0.684	626.5	609	624.5
	0.685	625	614	620.5
	0.686	624.5	612.5	623
	0.687	624	613.5	624.5
	0.688	624	614	622
	0.689	624	609.5	622
	0.69	624.5	610.5	622.5
	0.691	623.5	611	620
	0.692	624.5	611.5	623.5
	0.693	625	615.5	622.5
	0.694	622	612	622
	0.695	622	615	624.5
	0.696	623.5	615	622
	0.697	621	614	622.5
	0.698	621.5	614.5	620
	0.699	619.5	614.5	626.5
	0.7	623.5	617	622
	0.701	623.5	616	623
	0.702	622	615.5	623.5
	0.703	621	615.5	624
	0.704	620.5	617	623
	0.705	619.5	616.5	618.5
	0.706	622	615.5	624
	0.707	620	616	621
	0.708	622	616.5	622
	0.709	622	619	623
	0.71	621.5	617	621
	0.711	620	620.5	624.5
	0.712	619.5	619	621.5
	0.713	621	619	621
	0.714	622.5	617	623
	0.715	622.5	619.5	623.5
	0.716	623.5	621	621.5
	0.717	622	617	621.5
	0.718	623.5	620	622
	0.719	617	620.5	617
	0.72	622	617	622
	0.721	621.5	619.5	624
	0.722	623	622.5	621
	0.723	622	619.5	622
	0.724	622.5	620.5	623.5
	0.725	622.5	621	622.5
	0.726	624.5	621	623.5
	0.727	624.5	622	623
	0.728	622	622.5	621.5
	0.729	622.5	622	621
	0.73	626	622	626.5
	0.731	617	622	623.5
	0.732	624.5	623.5	624.5
	0.733	623.5	621.5	622
	0.734	627.5	621	622
	0.735	624.5	622.5	618.5
	0.736	624	622	622.5
	0.737	626	624.5	622
	0.738	627.5	622.5	620.5
	0.739	624	620.5	622.5
	0.74	625	622	623.5
	0.741	624.5	622	622.5
	0.742	628	624	621
	0.743	625.5	619	624
	0.744	628.5	620.5	621
	0.745	627	623	624.5
	0.746	629.5	622	622
	0.747	629	624	621.5
	0.748	627	623.5	625
	0.749	628.5	623	622.5
	0.75	627.5	619.5	625.5
	0.751	630.5	622	624
	0.752	629	625	624.5
	0.753	626.5	623	623
	0.754	634	625	624.5
	0.755	628	623	624
	0.756	636	621	623
	0.757	629.5	623	625.5
	0.758	632	622.5	620
	0.759	631	622	622.5
	0.76	630	626	624.5
	0.761	629.5	621	622
	0.762	632	624.5	621.5
	0.763	630	622.5	617
	0.764	632	626	625.5
	0.765	632	625.5	621
	0.766	633.5	626.5	620
	0.767	631	624.5	625
	0.768	629	623.5	621
	0.769	632	627.5	620.5
	0.77	629.5	624	619.5
	0.771	631.5	624.5	622.5
	0.772	630.5	629	620
	0.773	630	623	621
	0.774	630.5	626.5	621.5
	0.775	629	629	617
	0.776	629.5	628.5	622
	0.777	627.5	624	619.5
	0.778	631	626	619
	0.779	630	626.5	617
	0.78	629.5	623.5	619
	0.781	629	626	620
	0.782	630.5	624	618.5
	0.783	629	624.5	617
	0.784	627.5	623.5	619.5
	0.785	627.5	623	618.5
	0.786	630.5	622.5	617
	0.787	626.5	622	619.5
	0.788	629.5	624.5	617
	0.789	631	626.5	617
	0.79	628.5	624	617
	0.791	626	622.5	619.5
	0.792	627.5	624	619.5
	0.793	624.5	624.5	621
	0.794	623.5	622	619
	0.795	626	627.5	619.5
	0.796	621.5	626.5	620
	0.797	624.5	621	620
	0.798	627.5	622.5	617
	0.799	622	622.5	619
	0.8	625	624.5	617
	0.801	623	619.5	617
	0.802	623.5	620	616
	0.803	622	621	619
	0.804	622.5	619.5	616
	0.805	623.5	617	619
	0.806	624.5	623.5	614
	0.807	622	620	615.5
	0.808	621	617	616
	0.809	622	622	617
	0.81	617	620	615.5
	0.811	619	620	617
	0.812	622	620	613.5
	0.813	619	622	617
	0.814	622.5	621.5	613.5
	0.815	621.5	620	615.5
	0.816	621	621.5	616.5
	0.817	620	618.5	620.5
	0.818	622	616	616
	0.819	617	619	613
	0.82	622.5	617	616.5
	0.821	622	621	615.5
	0.822	622	622	616
	0.823	622.5	619	619
	0.824	619.5	620.5	616.5
	0.825	617	621	617
	0.826	619.5	619.5	616.5
	0.827	617	622	619.5
	0.828	621	622	615.5
	0.829	620	619	619
	0.83	617	621	615.5
	0.831	619.5	623	616
	0.832	617	618.5	617
	0.833	619.5	620.5	617
	0.834	619	617	617
	0.835	620.5	620.5	619.5
	0.836	615.5	625	615.5
	0.837	620.5	619.5	616.5
	0.838	617	622	617
	0.839	620.5	619.5	616.5
	0.84	618	622	617
	0.841	617	619.5	617
	0.842	614.5	621.5	617
	0.843	617	620	619.5
	0.844	620	622	617
	0.845	621	619.5	616
	0.846	621	621	617
	0.847	617	621	615.5
	0.848	617	619	621
	0.849	617	619	617
	0.85	615.5	619	617
	0.851	622	619.5	617
	0.852	619	620.5	621
	0.853	621.5	620	621.5
	0.854	622	622.5	619.5
	0.855	626	622.5	617
	0.856	617	620.5	619
	0.857	619	622	620
	0.858	620	621	621
	0.859	621	624.5	622.5
	0.86	622	622	619
	0.861	626	623.5	619
	0.862	622.5	621	614.5
	0.863	621	622	622
	0.864	621	624	617
	0.865	622.5	623	620
	0.866	623	617	618.5
	0.867	621	622	621
	0.868	622	621.5	617
	0.869	625.5	621	620.5
	0.87	620	622.5	619
	0.871	622.5	617	621
	0.872	626.5	621.5	623.5
	0.873	624.5	624.5	617
	0.874	621.5	622	618.5
	0.875	623.5	622	615.5
	0.876	626	622	621
	0.877	623.5	622	622.5
	0.878	624.5	620.5	619
	0.879	624.5	622	622
	0.88	627	622	620.5
	0.881	623.5	622	621
	0.882	624.5	620	619
	0.883	629	617	619
	0.884	627	624	617
	0.885	628	622	621.5
	0.886	628	620	619
	0.887	623.5	621	620.5
	0.888	627	622.5	617
	0.889	624.5	620	621
	0.89	626	619	621.5
	0.891	629.5	623.5	619
	0.892	628	622.5	617
	0.893	626.5	619.5	619.5
	0.894	630	617	620
	0.895	629	621	622.5
	0.896	626.5	622.5	617
	0.897	627.5	621	619.5
	0.898	629	623	618.5
	0.899	630	622.5	622
	0.9	628.5	623	619.5
	0.901	629.5	620	619
	0.902	627	622.5	619
	0.903	628	622	620
	0.904	629	621	619.5
	0.905	627.5	620.5	619
	0.906	625.5	621	621
	0.907	623.5	621	621
	0.908	629	618.5	617
	0.909	628.5	619.5	621
	0.91	625.5	621	617
	0.911	627	621	619.5
	0.912	628	623	619
	0.913	624	623	617
	0.914	624	622.5	623.5
	0.915	625.5	619.5	620.5
	0.916	622.5	621	615.5
	0.917	623	619	617
	0.918	622.5	625.5	620.5
	0.919	625.5	621.5	619.5
	0.92	623	623	617
	0.921	623.5	621.5	617
	0.922	622.5	622	620
	0.923	624.5	623	618.5
	0.924	623.5	622	617
	0.925	621	627.5	619
	0.926	620.5	623	617
	0.927	623	621.5	617
	0.928	622.5	619.5	619
	0.929	622.5	625	618.5
	0.93	622.5	625.5	620.5
	0.931	624.5	622	620.5
	0.932	621	626	622
	0.933	623	626	617
	0.934	622.5	624	623.5
	0.935	622.5	622	619
	0.936	620.5	622	616.5
	0.937	620.5	626	621.5
	0.938	624.5	624.5	622
	0.939	624	623.5	622
	0.94	619.5	626.5	622
	0.941	625	625.5	622.5
	0.942	623	622.5	619
	0.943	625	624.5	625
	0.944	627	625	621.5
	0.945	626	628.5	620
	0.946	626.5	624.5	625
	0.947	624.5	625.5	622
	0.948	625.5	623.5	622
	0.949	626	629	621.5
	0.95	627.5	622	622
	0.951	628.5	623.5	622
	0.952	629	619.5	622.5
	0.953	626	623	622.5
	0.954	629	625	625
	0.955	626	625	622.5
	0.956	629	623	621
	0.957	627.5	627	625
	0.958	629	622.5	621.5
	0.959	630.5	621	622.5
	0.96	629.5	626.5	624.5
	0.961	628	622.5	623
	0.962	630	622	624
	0.963	636	623	624
	0.964	629	624.5	624.5
	0.965	631	622	623.5
	0.966	631	617	627.5
	0.967	631.5	617	625
	0.968	632	622	623.5
	0.969	632	620.5	623
	0.97	634	622.5	626
	0.971	633.5	619	624
	0.972	632	617	622
	0.973	632	620	619.5
	0.974	635.5	619.5	624
	0.975	635	619	626
	0.976	632	619.5	622
	0.977	631.5	620	622.5
	0.978	632	618.5	624
	0.979	634	617	625
	0.98	632	617	624
	0.981	636	619	626
	0.982	636	621	624.5
	0.983	634.5	621	624
	0.984	634	617	622.5
	0.985	631.5	622	623.5
	0.986	635.5	618.5	623.5
	0.987	635.5	622	623.5
	0.988	631.5	617	622
	0.989	630	619.5	621
	0.99	635	617	619.5
	0.991	634.5	620	620.5
	0.992	633.5	616	622.5
	0.993	629	620	622
	0.994	631.5	621	618.5
	0.995	631	617	619.5
	0.996	631	616	621.5
	0.997	631.5	617	619
	0.998	629.5	621	619.5
	0.999	632	617	616.5
	1	629	617	620
	1.001	629	619.5	621.5
	1.002	631	617	616.5
	1.003	630.5	617	617
	1.004	628.5	621	617
	1.005	626.5	617	617
	1.006	631	617	617
	1.007	629	617	619
	1.008	629.5	617	616
	1.009	628	617	616
	1.01	625.5	615.5	617
	1.011	627.5	618.5	620
	1.012	627.5	621	617
	1.013	627.5	620	616.5
	1.014	623	622	617
	1.015	624.5	619.5	617
	1.016	623	617	616.5
	1.017	624	618.5	615
	1.018	626	617	619
	1.019	622	618	611
	1.02	625.5	619	615.5
	1.021	623.5	622	619.5
	1.022	623.5	623.5	616
	1.023	622	621	613.5
	1.024	624	621	617
	1.025	623	620.5	613.5
	1.026	622	621.5	615.5
	1.027	622	622	614.5
	1.028	622.5	620	612
	1.029	621.5	621.5	615.5
	1.03	621	620	616
	1.031	621	620.5	614.5
	1.032	620.5	622	614.5
	1.033	621.5	621	615.5
	1.034	622.5	619.5	617
	1.035	621	617	614
	1.036	623	618	614
	1.037	621.5	620	614.5
	1.038	617	619.5	615
	1.039	620	619.5	615.5
	1.04	617	617	612.5
	1.041	621	621.5	615.5
	1.042	622.5	617	615.5
	1.043	619.5	619	617
	1.044	621	617	617
	1.045	622	619	612.5
	1.046	622	621	615.5
	1.047	622	622	615.5
	1.048	617	619.5	617
	1.049	623	622.5	616
	1.05	616.5	621	617
	1.051	619	619.5	617
	1.052	622	617	616.5
	1.053	620.5	621.5	617
	1.054	623.5	617	615.5
	1.055	622	619	619
	1.056	622	622	617
	1.057	623.5	619.5	619.5
	1.058	622	620.5	617
	1.059	622.5	617	617
	1.06	624.5	620	617
	1.061	621.5	619.5	616
	1.062	622.5	619.5	615.5
	1.063	622	619.5	617
	1.064	617	617	623.5
	1.065	620	619	622
	1.066	619.5	620	617
	1.067	624	617	619.5
	1.068	623.5	621	619.5
	1.069	621	619	617
	1.07	621	621.5	617
	1.071	621	622	621
	1.072	624.5	621.5	615.5
	1.073	623.5	620	619
	1.074	624	623	616.5
	1.075	622	617	618.5
	1.076	622	619.5	617
	1.077	623	621.5	617
	1.078	622	622.5	615
	1.079	620	620.5	620
	1.08	622	620	615.5
	1.081	623	624.5	622
	1.082	622	622.5	622
	1.083	623.5	622	617
	1.084	625.5	624.5	620
	1.085	622.5	623.5	617
	1.086	619.5	624	621.5
	1.087	622	620	620.5
	1.088	623.5	627.5	615
	1.089	622.5	623.5	617
	1.09	623.5	622.5	619
	1.091	620	625.5	621
	1.092	620.5	626	617
	1.093	620.5	626	617
	1.094	622	627	619
	1.095	621	625.5	621
	1.096	624.5	626	620
	1.097	622	626.5	622
	1.098	620.5	626.5	617
	1.099	624.5	626.5	621
	1.1	622.5	622.5	617
	1.101	620.5	627	619
	1.102	625.5	626.5	617
	1.103	623	624.5	619
	1.104	622	626.5	620
	1.105	621	628	619.5
	1.106	621.5	623	617
	1.107	622.5	628.5	620.5
	1.108	622.5	628.5	620
	1.109	620	629	622.5
	1.11	622	626.5	617
	1.111	622	628	615.5
	1.112	622	627	617
	1.113	622.5	626.5	620
	1.114	620	625.5	617
	1.115	625	629	618.5
	1.116	626.5	628.5	620
	1.117	622	627.5	619
	1.118	623.5	628.5	622
	1.119	627	627.5	617
	1.12	623	626	619.5
	1.121	626.5	629	617
	1.122	622	629	617
	1.123	623.5	628.5	619
	1.124	624.5	626	617
	1.125	624	630	619
	1.126	622.5	625.5	615.5
	1.127	622	624	622.5
	1.128	622	624.5	617
	1.129	624	626	615.5
	1.13	623.5	628.5	617
	1.131	626	628	617
	1.132	623.5	626.5	619
	1.133	626	627	617
	1.134	627.5	626	622
	1.135	626	628	618
	1.136	626.5	626.5	619
	1.137	622	625.5	622.5
	1.138	624.5	627	625.5
	1.139	627	622.5	618
	1.14	626	622	622
	1.141	627.5	623.5	620
	1.142	627.5	625.5	617
	1.143	626	624.5	623
	1.144	631	619	625
	1.145	626	620	622.5
	1.146	626.5	624.5	621.5
	1.147	624.5	624	621.5
	1.148	625.5	620.5	623.5
	1.149	629.5	625.5	622
	1.15	627.5	624	617
	1.151	628.5	622.5	624
	1.152	625.5	620.5	625
	1.153	626	624.5	624.5
	1.154	629.5	622	622.5
	1.155	623.5	617	624
	1.156	625	621	624
	1.157	624	624.5	626
	1.158	627.5	621	624.5
	1.159	628.5	619.5	624.5
	1.16	624.5	621.5	625
	1.161	626.5	622.5	624.5
	1.162	625.5	622	626.5
	1.163	626	621	624.5
	1.164	622.5	619.5	626
	1.165	622	617	624.5
	1.166	624.5	622	627
	1.167	625.5	617	624.5
	1.168	623	617	624.5
	1.169	624	620.5	626
	1.17	622	622	623.5
	1.171	626	621.5	623
	1.172	623.5	620	628.5
	1.173	624.5	620	627
	1.174	626.5	622	626
	1.175	627	619	626.5
	1.176	625.5	619	622
	1.177	622	617	622
	1.178	628	617	622
	1.179	624.5	620.5	626.5
	1.18	622	619	626.5
	1.181	623	617	622
	1.182	622.5	619	626
	1.183	624	619	624.5
	1.184	623.5	619	623.5
	1.185	623.5	620	623
	1.186	623.5	616	620.5
	1.187	622	619	625
	1.188	624.5	622.5	621.5
	1.189	622	618.5	621.5
	1.19	622	619	623
	1.191	620	617	624.5
	1.192	621.5	619.5	621
	1.193	621	619.5	621
	1.194	621.5	617	623.5
	1.195	622.5	622	621
	1.196	618.5	616.5	622.5
	1.197	619.5	621.5	618.5
	1.198	617	620	620.5
	1.199	619	622	617
	1.2	621	619.5	621
	1.201	617	620	620
	1.202	622	620	617
	1.203	621	623.5	621.5
	1.204	617	620	617
	1.205	620.5	617	619.5
	1.206	621	617	619.5
	1.207	621	622.5	618.5
	1.208	620.5	620	616.5
	1.209	623	621.5	620
	1.21	620	616	617
	1.211	621	619.5	612.5
	1.212	619.5	619	618.5
	1.213	617	624.5	617
	1.214	617	619.5	620
	1.215	619.5	617	619.5
	1.216	620	624	615.5
	1.217	623.5	620	615.5
	1.218	617	620.5	616
	1.219	622.5	617	617
	1.22	617	617	617
	1.221	619	617	616.5
	1.222	620	620	617
	1.223	620	624.5	612.5
	1.224	620	621	619
	1.225	621	619	617
	1.226	619	620	616.5
	1.227	621	618.5	617
	1.228	617	621	615.5
	1.229	624.5	619	616.5
	1.23	621	621.5	615
	1.231	620	620.5	617
	1.232	621	621	615.5
	1.233	617	620.5	617
	1.234	623.5	622	615.5
	1.235	622	619.5	613
	1.236	619	622.5	615.5
	1.237	620	621.5	617
	1.238	621	624.5	612.5
	1.239	620	622	616.5
	1.24	619	623.5	615.5
	1.241	619	621	613.5
	1.242	621	622.5	613.5
	1.243	621.5	619.5	616
	1.244	624.5	623	614.5
	1.245	621	621.5	617
	1.246	620	626.5	616
	1.247	622	622	615.5
	1.248	622.5	623.5	617
	1.249	620	623	613.5
	1.25	617	626.5	614.5
	1.251	619	622.5	615
	1.252	619.5	628	615
	1.253	623	627	613.5
	1.254	619	621	614.5
	1.255	622	623	616
	1.256	621	622	617
	1.257	619.5	625	619
	1.258	621.5	622	612
	1.259	619	622	620
	1.26	621.5	622	615.5
	1.261	620	621.5	620
	1.262	623	623.5	615.5
	1.263	620.5	619	616
	1.264	622	621	617
	1.265	619	621.5	617
	1.266	620.5	622.5	622
	1.267	619.5	621.5	617
	1.268	621	622.5	617
	1.269	625.5	623.5	619
	1.27	622	624.5	617
	1.271	621.5	626	620
	1.272	621.5	624	615.5
	1.273	622	622	620
	1.274	619.5	621	621
	1.275	623.5	623.5	621.5
	1.276	622.5	621.5	615.5
	1.277	621.5	621.5	617
	1.278	622	622	620
	1.279	617	623	622
	1.28	616.5	621	620.5
	1.281	622	623.5	622.5
	1.282	620.5	623	620
	1.283	621.5	624	622
	1.284	620.5	622	623
	1.285	620	627.5	621
	1.286	621	622	619.5
	1.287	621.5	622	623.5
	1.288	619	624.5	622
	1.289	622	622	623.5
	1.29	620.5	622	619.5
	1.291	620	622.5	622
	1.292	619.5	623.5	623
	1.293	622.5	624	622.5
	1.294	620.5	624.5	621
	1.295	623	624.5	624
	1.296	622	628.5	624.5
	1.297	622	622.5	622
	1.298	620	625	623.5
	1.299	622	624	624
	1.3	622	627	624
	1.301	622	629	624
	1.302	619	626.5	624.5
	1.303	620.5	628.5	625
	1.304	621	629.5	622.5
	1.305	622	627	625.5
	1.306	622.5	628	626.5
	1.307	622	631	622
	1.308	623.5	629	623.5
	1.309	619.5	630	626
	1.31	617	627.5	628
	1.311	621.5	629	625.5
	1.312	622	627.5	627.5
	1.313	620.5	628	627
	1.314	618.5	629	627
	1.315	624	631	629
	1.316	623.5	626.5	632
	1.317	621	627.5	626
	1.318	622.5	628	626
	1.319	622.5	629	628
	1.32	624.5	629	630
	1.321	625	629	630
	1.322	624	627	632
	1.323	622.5	628.5	629.5
	1.324	625	627.5	632
	1.325	624.5	626	631.5
	1.326	622	624.5	628
	1.327	625.5	624.5	629
	1.328	627	629	631
	1.329	622.5	623.5	630
	1.33	625.5	626.5	632
	1.331	625.5	628.5	631.5
	1.332	627.5	628.5	627.5
	1.333	626.5	629	630
	1.334	629.5	629	628.5
	1.335	628.5	626.5	629
	1.336	629	628	629
	1.337	631	626	632
	1.338	632	629	629
	1.339	629	628	629
	1.34	628.5	628.5	629.5
	1.341	629	628.5	627.5
	1.342	628.5	625.5	627.5
	1.343	630	625.5	627.5
	1.344	629.5	627	627.5
	1.345	632	627	629.5
	1.346	632	624	624.5
	1.347	629	626.5	627
	1.348	632	626.5	629
	1.349	632	624	628
	1.35	630	626.5	624.5
	1.351	630	626	622
	1.352	629	623.5	622
	1.353	629	625.5	623.5
	1.354	633.5	627.5	622
	1.355	631	627.5	626.5
	1.356	632	622.5	624
	1.357	636	623	622
	1.358	633.5	627	623
	1.359	633.5	623	624
	1.36	630	625.5	620
	1.361	629	624.5	622
	1.362	628	623	623.5
	1.363	629.5	626	617
	1.364	633.5	623.5	622
	1.365	631	624.5	621
	1.366	629	624	621.5
	1.367	628.5	622.5	621.5
	1.368	629.5	621	619
	1.369	627.5	622.5	617
	1.37	630	623	617
	1.371	630.5	623	615
	1.372	629	622	620
	1.373	628.5	621.5	617
	1.374	629	621.5	614.5
	1.375	628	621	615.5
	1.376	628.5	617	612
	1.377	624.5	619.5	615.5
	1.378	626.5	617	617
	1.379	626	617	616.5
	1.38	623.5	617	615.5
	1.381	627	619	617
	1.382	629	616	615.5
	1.383	626.5	617	620
	1.384	626	615.5	615.5
	1.385	622.5	619	615.5
	1.386	627.5	617	616
	1.387	624.5	614.5	616
	1.388	623.5	614.5	615.5
	1.389	622.5	613	615
	1.39	625.5	616	615.5
	1.391	623	614	615.5
	1.392	620	614.5	615.5
	1.393	623	617	615
	1.394	623.5	614.5	613.5
	1.395	622.5	617	614.5
	1.396	622.5	612.5	612
	1.397	619.5	612	611
	1.398	621.5	616	614
	1.399	622.5	615.5	613.5
	1.4	620.5	612.5	613.5
	1.401	622	616	613.5
	1.402	621	613.5	617
	1.403	622.5	616	614
	1.404	623.5	615.5	616.5
	1.405	620.5	617	614
	1.406	620	615.5	615.5
	1.407	620	619.5	616
	1.408	620	616.5	617
	1.409	622	616	617
	1.41	617	615.5	616.5
	1.411	618.5	616.5	616
	1.412	623	613	615.5
	1.413	617	617	617
	1.414	619.5	617	615.5
	1.415	621	613.5	616
	1.416	620	616	617
	1.417	621.5	615.5	619.5
	1.418	620.5	616	618.5
	1.419	620	617	617
	1.42	623.5	614	616.5
	1.421	620.5	616	617
	1.422	622	617	617
	1.423	621.5	616	624.5
	1.424	622	614.5	620
	1.425	619	616.5	619
	1.426	620	617	621
	1.427	622	615	620.5
	1.428	621.5	615.5	617
	1.429	619.5	619	619
	1.43	621.5	613.5	617
	1.431	623.5	616.5	619.5
	1.432	623	615.5	619.5
	1.433	622.5	617	617
	1.434	626	617	620
	1.435	623.5	616	621
	1.436	625	617	617
	1.437	627.5	617	617
	1.438	622.5	620.5	620
	1.439	627.5	619	619
	1.44	627.5	620	617
	1.441	624.5	616	621.5
	1.442	625	617	619.5
	1.443	631	617	620
	1.444	629	617	621
	1.445	629	617	619.5
	1.446	628.5	619	623.5
	1.447	627.5	618.5	620
	1.448	628.5	622	619
	1.449	632	621	619.5
	1.45	631.5	621.5	622
	1.451	631.5	621	621
	1.452	629	621.5	617
	1.453	631	621	619.5
	1.454	634.5	622.5	619.5
	1.455	635.5	622	617
	1.456	632	622.5	617
	1.457	634	622	620.5
	1.458	630.5	622	619
	1.459	631	624.5	620
	1.46	632	623.5	622
	1.461	632	620	617
	1.462	635	624	622.5
	1.463	636.5	624	617
	1.464	636	625	619
	1.465	637	626.5	624
	1.466	639.5	625.5	618.5
	1.467	636.5	625.5	621
	1.468	638	626.5	621
	1.469	636.5	627	620
	1.47	638.5	629	619
	1.471	636.5	629	617
	1.472	641.5	629.5	617
	1.473	637.5	627.5	621.5
	1.474	640	628	622.5
	1.475	639	628.5	617
	1.476	641	629	619
	1.477	642.5	627.5	616
	1.478	642	630.5	617
	1.479	641.5	631.5	621
	1.48	642.5	627.5	622.5
	1.481	642	631	619.5
	1.482	643	632	622
	1.483	643.5	630	622
	1.484	645	630.5	621
	1.485	649	635.5	617
	1.486	643	631	619.5
	1.487	647	636	617
	1.488	644	634	616
	1.489	649	635	617
	1.49	641	635.5	622
	1.491	645.5	632	615.5
	1.492	645	635	616.5
	1.493	644.5	634	620
	1.494	648.5	635.5	617
	1.495	643	636	617
	1.496	647	638.5	619.5
	1.497	645	636.5	617
	1.498	645.5	636	617
	1.499	642.5	639.5	619
	1.5	646.5	638.5	619
	1.501	647	639	622
	1.502	646.5	640	622.5
	1.503	643	638	620
	1.504	643	640	617
	1.505	642	639	619.5
	1.506	643	638.5	620
	1.507	643	642.5	621
	1.508	642.5	642	617
	1.509	640.5	640.5	620.5
	1.51	642.5	643.5	622
	1.511	640	641	625.5
	1.512	638	641	620.5
	1.513	641	639.5	619.5
	1.514	636.5	638	621
	1.515	639.5	643.5	622
	1.516	637	644	622
	1.517	637.5	640.5	623.5
	1.518	632	644	622
	1.519	636.5	644.5	624
	1.52	632	641.5	622.5
	1.521	629	644	623.5
	1.522	629	643.5	624.5
	1.523	630	642	622
	1.524	629	640.5	625.5
	1.525	628.5	640	626
	1.526	626.5	642.5	627.5
	1.527	623.5	642	626.5
	1.528	625.5	641.5	623
	1.529	620	639.5	622
	1.53	622	641	629
	1.531	617	641.5	626
	1.532	618.5	642.5	626
	1.533	616.5	641.5	626
	1.534	614.5	639	629
	1.535	614	643	626
	1.536	615	644	625
	1.537	610.5	639.5	624
	1.538	608.5	639	624
	1.539	607.5	636.5	624
	1.54	609	641.5	630
	1.541	609	638.5	626
	1.542	606	641.5	627
	1.543	605	640.5	625
	1.544	601.5	639.5	624.5
	1.545	600.5	640	628
	1.546	596.5	636	627.5
	1.547	599	640.5	626.5
	1.548	596	636.5	630.5
	1.549	599.5	639.5	626
	1.55	594.5	640	626.5
	1.551	594	641.5	625.5
	1.552	590.5	641	626
	1.553	589.5	639	629
	1.554	587.5	641.5	624
	1.555	585.5	642	625.5
	1.556	585	638	628
	1.557	584.5	642.5	628
	1.558	581.5	642	627.5
	1.559	583.5	639.5	625
	1.56	583.5	636	629
	1.561	581	640	630
	1.562	581	638.5	627.5
	1.563	576.5	637.5	627
	1.564	577	638	628
	1.565	575.5	636.5	622
	1.566	574.5	634	630
	1.567	576	634.5	625.5
	1.568	576.5	636	628
	1.569	572.5	632	627.5
	1.57	573.5	635.5	626.5
	1.571	569.5	632	627.5
	1.572	571.5	631	624.5
	1.573	572.5	635.5	627.5
	1.574	568	629.5	624
	1.575	570	631	626.5
	1.576	566.5	633.5	626.5
	1.577	569	632	624.5
	1.578	563	631.5	623
	1.579	567	630	625
	1.58	565.5	631.5	624
	1.581	564	630.5	627.5
	1.582	562.5	629	628
	1.583	566	627	624
	1.584	564	630	626.5
	1.585	560.5	628.5	623.5
	1.586	557.5	624	624.5
	1.587	566	622.5	624.5
	1.588	557.5	627.5	622
	1.589	559.5	627	622
	1.59	557.5	625	620
	1.591	563	622	621.5
	1.592	561	624.5	619.5
	1.593	557	622	622.5
	1.594	561.5	620	623.5
	1.595	556	621.5	622.5
	1.596	560.5	622.5	621
	1.597	556.5	620.5	621.5
	1.598	560.5	617	620
	1.599	560	617	617
	1.6	557.5	613	619.5
	1.601	557	614	617
	1.602	557	615	619
	1.603	557.5	611.5	616.5
	1.604	559.5	610.5	620.5
	1.605	557.5	613	616
	1.606	557.5	609.5	617
	1.607	557	607	621
	1.608	557	608	621
	1.609	554	606	616
	1.61	555.5	604.5	614.5
	1.611	553.5	603.5	616.5
	1.612	553	604	617
	1.613	549.5	601	617
	1.614	549	597.5	621
	1.615	548.5	594	615.5
	1.616	545	595.5	616
	1.617	545	590.5	616
	1.618	540.5	594	619.5
	1.619	535.5	587.5	615.5
	1.62	539.5	590	614
	1.621	535	587	617
	1.622	529	582.5	615.5
	1.623	529.5	580	616
	1.624	526.5	577.5	614
	1.625	520.5	579	617
	1.626	519	574	615.5
	1.627	508.5	571.5	615
	1.628	507.5	571	614.5
	1.629	503.5	568	615.5
	1.63	496	565	616.5
	1.631	494	563.5	615.5
	1.632	485	561.5	616.5
	1.633	479.5	557.5	613
	1.634	471	554	615
	1.635	464.5	551.5	617
	1.636	456	549.5	614.5
	1.637	451	545.5	613.5
	1.638	442.5	542.5	615.5
	1.639	431.5	537.5	615.5
	1.64	426.5	538	617
	1.641	411	533.5	617
	1.642	410.5	527	614.5
	1.643	401	529	616
	1.644	390	523.5	615.5
	1.645	381	519	616.5
	1.646	370.5	515.5	614.5
	1.647	360	514.5	617
	1.648	348.5	510.5	615
	1.649	344	509	617
	1.65	335.5	503	617
	1.651	324	502	617
	1.652	314.5	499	617
	1.653	305.5	493.5	617
	1.654	296.5	494.5	617
	1.655	287	489	617
	1.656	280	487.5	620.5
	1.657	269.5	483	616
	1.658	260.5	480	616
	1.659	255	477.5	619.5
	1.66	246	474	621
	1.661	239.5	469.5	620.5
	1.662	230	471	622
	1.663	221	465	621.5
	1.664	214	460	623
	1.665	210	460	622
	1.666	200	457.5	623.5
	1.667	193	451	628
	1.668	186.5	447	628.5
	1.669	179	446.5	626
	1.67	175.5	441	627.5
	1.671	168	438	627.5
	1.672	162	434.5	630
	1.673	157.5	433.5	627.5
	1.674	153	427	626.5
	1.675	147	423.5	631.5
	1.676	145	421.5	630.5
	1.677	141	416.5	631.5
	1.678	140	411.5	634.5
	1.679	135	408	631
	1.68	129	402	629.5
	1.681	132	395.5	635
	1.682	126	392	636
	1.683	130.5	391	633
	1.684	124	386	634.5
	1.685	125	380.5	632
	1.686	126.5	376.5	637.5
	1.687	125	376	638
	1.688	123.5	363	640
	1.689	124	357	634.5
	1.69	122.5	355.5	639
	1.691	121	353.5	640.5
	1.692	117.5	347.5	638
	1.693	118	339	639
	1.694	116	334.5	641
	1.695	115.5	328.5	636.5
	1.696	118	324	638.5
	1.697	116.5	317	641
	1.698	117	311.5	642
	1.699	115.5	305	641
	1.7	115	298.5	643
	1.701	117.5	294	642.5
	1.702	118	288.5	643
	1.703	116	280.5	644
	1.704	117.5	278.5	641
	1.705	115.5	269.5	642
	1.706	119.5	267.5	643
	1.707	118	259.5	643.5
	1.708	119	258	643
	1.709	118.5	251	642.5
	1.71	117	244.5	643
	1.711	118.5	242.5	647
	1.712	118.5	235.5	647
	1.713	121.5	231	646.5
	1.714	119.5	224	646
	1.715	117.5	220	643.5
	1.716	121.5	216	643.5
	1.717	119.5	209	645.5
	1.718	123	204	647
	1.719	123	201	645
	1.72	123	194.5	644.5
	1.721	126	189	647
	1.722	123	186	646.5
	1.723	127	181.5	646
	1.724	122.5	176	644.5
	1.725	128	172	650.5
	1.726	127.5	171	647
	1.727	131.5	165	645
	1.728	130	157	647
	1.729	134	155.5	647
	1.73	132.5	153.5	646.5
	1.731	130	147.5	645
	1.732	133.5	145	647
	1.733	134	142	646.5
	1.734	135	138.5	644.5
	1.735	137.5	136.5	645
	1.736	139	134	641.5
	1.737	138.5	129.5	645
	1.738	141	130	641
	1.739	142	123	640
	1.74	141.5	123	640.5
	1.741	143.5	118	641
	1.742	143	116	638.5
	1.743	147	114.5	639
	1.744	147.5	110	642
	1.745	147	104	640.5
	1.746	146.5	105	636.5
	1.747	148.5	103.5	640
	1.748	150	101	635.5
	1.749	155	103	637.5
	1.75	151	94.5	638
	1.751	151	93.5	636
	1.752	156.5	95	635
	1.753	155.5	90	633
	1.754	156	92	629.5
	1.755	158	90.5	631.5
	1.756	157	87	632
	1.757	161.5	86.5	632
	1.758	163	84.5	629.5
	1.759	161.5	83.5	628.5
	1.76	164	86	625.5
	1.761	160	87	626
	1.762	163.5	85.5	625.5
	1.763	164.5	81.5	628
	1.764	164	80	626.5
	1.765	165.5	78.5	622
	1.766	168.5	80.5	621
	1.767	167.5	79.5	623.5
	1.768	169.5	78	622
	1.769	172.5	76.5	621
	1.77	172	76.5	621.5
	1.771	173	79	619.5
	1.772	177	79	620.5
	1.773	179.5	76.5	619.5
	1.774	181	76.5	616.5
	1.775	181.5	75.5	617
	1.776	189.5	76	616.5
	1.777	189.5	76.5	615
	1.778	191.5	75.5	612.5
	1.779	193.5	75	612.5
	1.78	198	78.5	611.5
	1.781	204	78	613
	1.782	208	77	612
	1.783	206.5	75.5	610.5
	1.784	214	75	610
	1.785	214.5	77	607.5
	1.786	216.5	77.5	614.5
	1.787	221	81	611
	1.788	220	72.5	610.5
	1.789	222	77	608
	1.79	227.5	76.5	606
	1.791	229.5	78.5	608
	1.792	228.5	79	606
	1.793	233.5	76	609.5
	1.794	234.5	80	604.5
	1.795	237.5	78.5	606
	1.796	241	79.5	601.5
	1.797	239	80	604
	1.798	245.5	84	601
	1.799	247	82.5	598.5
	1.8	252.5	87	601
	1.801	253	88	598
	1.802	256	88.5	599
	1.803	255.5	90	599.5
	1.804	264.5	93.5	599
	1.805	266.5	95.5	595.5
	1.806	270.5	94	598.5
	1.807	273	97.5	596
	1.808	276	96.5	597
	1.809	281.5	101	592.5
	1.81	288	102.5	591
	1.811	288.5	108	592.5
	1.812	292.5	107.5	587.5
	1.813	298.5	113	593
	1.814	302	115.5	586.5
	1.815	309	119.5	584
	1.816	313.5	122.5	587.5
	1.817	313	126.5	584.5
	1.818	318.5	130.5	584.5
	1.819	319	131	584.5
	1.82	326.5	135.5	582
	1.821	326.5	138	579
	1.822	334	140	579
	1.823	340	141.5	576
	1.824	340	144.5	577
	1.825	344	147.5	575
	1.826	349	150	572
	1.827	355.5	153.5	568
	1.828	360.5	157.5	570
	1.829	367.5	166	567
	1.83	368.5	162.5	562.5
	1.831	378	165.5	567.5
	1.832	381	171	561.5
	1.833	384.5	177	562.5
	1.834	396.5	177.5	557.5
	1.835	403	184.5	555
	1.836	405	186.5	552
	1.837	412	192.5	551.5
	1.838	417	190.5	550
	1.839	424	194.5	548
	1.84	429.5	198	542.5
	1.841	433.5	202.5	539
	1.842	439.5	204.5	538
	1.843	447	208	533.5
	1.844	452.5	211	530.5
	1.845	461.5	213.5	527.5
	1.846	467.5	214.5	526.5
	1.847	470.5	219	520.5
	1.848	477	228	517
	1.849	487.5	234	517.5
	1.85	494	239	513.5
	1.851	499.5	246	510.5
	1.852	508	250	501.5
	1.853	511	261	502.5
	1.854	518.5	268	492.5
	1.855	527.5	271.5	496.5
	1.856	533	276.5	495
	1.857	542.5	283.5	490
	1.858	550.5	291.5	487
	1.859	555.5	299.5	483
	1.86	565.5	304	481.5
	1.861	571.5	308.5	484
	1.862	584.5	319	474
	1.863	592.5	327.5	471.5
	1.864	596.5	332	471.5
	1.865	608	341	463.5
	1.866	619.5	347	463.5
	1.867	623	356.5	461
	1.868	636	360	456
	1.869	642.5	369	452.5
	1.87	653.5	371	449.5
	1.871	660.5	378	450
	1.872	667	386.5	444
	1.873	673.5	390	442
	1.874	681.5	395	441.5
	1.875	694	400.5	436.5
	1.876	698	408	430.5
	1.877	706	414	429
	1.878	712	417	424
	1.879	721	419.5	418
	1.88	726	430.5	415.5
	1.881	734.5	436	412
	1.882	741	439.5	412
	1.883	751	444.5	404.5
	1.884	755	450	398
	1.885	760.5	459.5	397
	1.886	768	465.5	387
	1.887	774	473	384
	1.888	781	479	383
	1.889	786	484	377
	1.89	794	489.5	372.5
	1.891	800	499	365.5
	1.892	807	505	363
	1.893	811	514	355.5
	1.894	821.5	518.5	347
	1.895	829	532	342
	1.896	832.5	541	343
	1.897	842.5	546.5	331.5
	1.898	849	557.5	327
	1.899	852	565.5	321
	1.9	860	571.5	315
	1.901	868	583	308
	1.902	874	591.5	299.5
	1.903	879.5	603.5	298.5
	1.904	885.5	614.5	294
	1.905	890.5	624	287
	1.906	894	636	282.5
	1.907	902.5	645	275
	1.908	904	658	270
	1.909	910	666.5	267
	1.91	911	677	256.5
	1.911	915.5	690.5	254.5
	1.912	915.5	696.5	246.5
	1.913	928.5	706.5	241
	1.914	932	721.5	236
	1.915	935	729	228.5
	1.916	939.5	739	229
	1.917	942.5	753	219.5
	1.918	945	759	216.5
	1.919	949.5	769.5	212
	1.92	952.5	780	207
	1.921	957	791.5	199.5
	1.922	964.5	802	198
	1.923	967	808.5	197.5
	1.924	974.5	817.5	192.5
	1.925	973.5	828.5	189.5
	1.926	978.5	841	185
	1.927	980	851	180
	1.928	984.5	855.5	174
	1.929	988	866.5	173.5
	1.93	990	876.5	172.5
	1.931	993.5	884.5	170.5
	1.932	995	890	169
	1.933	1003.5	900.5	169
	1.934	1001.5	909.5	166.5
	1.935	1007	915.5	165.5
	1.936	1011	923	161.5
	1.937	1011.5	930	160
	1.938	1019.5	935	156.5
	1.939	1018.5	941.5	157
	1.94	1026	949	152.5
	1.941	1031	955	154
	1.942	1039.5	956	152
	1.943	1034.5	960	150.5
	1.944	1046	960	148.5
	1.945	1053	969.5	147.5
	1.946	1054.5	972.5	143.5
	1.947	1061.5	972.5	142
	1.948	1064.5	979.5	143
	1.949	1071	985	137.5
	1.95	1076	990	138
	1.951	1079.5	993.5	133.5
	1.952	1088	996	136.5
	1.953	1092	1002.5	129.5
	1.954	1094	1007.5	132.5
	1.955	1104.5	1007.5	131
	1.956	1105	1010.5	129
	1.957	1112.5	1016.5	126
	1.958	1120.5	1019	128
	1.959	1117	1019.5	128
	1.96	1124	1026.5	124
	1.961	1127	1027	126
	1.962	1134.5	1033.5	122
	1.963	1139	1034.5	122
	1.964	1142	1038.5	119.5
	1.965	1146	1040.5	119.5
	1.966	1154	1045	120.5
	1.967	1154	1048	123.5
	1.968	1160.5	1052.5	117
	1.969	1165.5	1055	119
	1.97	1173.5	1058	113
	1.971	1180	1061.5	117.5
	1.972	1180.5	1062	116
	1.973	1183	1070	113.5
	1.974	1190	1073	113.5
	1.975	1196	1075.5	112
	1.976	1198.5	1084.5	113
	1.977	1203.5	1086	115.5
	1.978	1209.5	1092.5	110
	1.979	1213.5	1093.5	111
	1.98	1221	1102.5	109.5
	1.981	1228.5	1108	108.5
	1.982	1231.5	1108.5	108.5
	1.983	1237.5	1117.5	110
	1.984	1243.5	1121.5	109
	1.985	1249	1124	111.5
	1.986	1255	1131	110
	1.987	1262	1137	110
	1.988	1266.5	1141	109
	1.989	1272	1144	111.5
	1.99	1273	1151.5	113.5
	1.991	1282.5	1154	113
	1.992	1288	1160.5	117
	1.993	1294.5	1166.5	114.5
[truncated: 6,006 more rows]

## Sheet: I
DataTypeVer2.0	Time	Fz	Fz	Fz
NumberOfData		15000	15000	15000
PreTriggerData		0	0	0
SamplingTime[ms]		1	1	1
DataLabel		AM1:CMJ	AM2:CMJ	AM3:CMJ
DataUnit	sec	N	N	N
	0	615	609.5	611
	0.001	612.5	611	611
	0.002	611	610.5	613.5
	0.003	611	610.5	615.5
	0.004	613.5	608	611
	0.005	608.5	609.5	615
	0.006	611	607.5	611
	0.007	615	607.5	615.5
	0.008	611	608.5	614.5
	0.009	613	607.5	608.5
	0.01	614	608.5	610.5
	0.011	608	605.5	610.5
	0.012	610	611	615.5
	0.013	608	607.5	611
	0.014	608.5	607	609
	0.015	607.5	607	614.5
	0.016	608.5	608	613.5
	0.017	607.5	611	611
	0.018	611	607	614
	0.019	607.5	609	611
	0.02	607	604.5	611
	0.021	606	608	615
	0.022	608.5	603	612.5
	0.023	608.5	606	610
	0.024	608	608.5	611
	0.025	605.5	608	613
	0.026	603	602.5	615
	0.027	604.5	605	611
	0.028	603.5	607	610
	0.029	603	606.5	610.5
	0.03	604.5	607.5	611
	0.031	605	605	611
	0.032	604	608	608.5
	0.033	601	608.5	609.5
	0.034	605	605	611
	0.035	607.5	610	608.5
	0.036	602.5	607	609
	0.037	604.5	608.5	608.5
	0.038	606	611	608.5
	0.039	604.5	610	607
	0.04	607	606	604.5
	0.041	607.5	608	607.5
	0.042	603	605.5	607
	0.043	603	609	605
	0.044	605.5	607.5	605.5
	0.045	608.5	605.5	607
	0.046	599.5	610.5	605.5
	0.047	603	606.5	604.5
	0.048	603	608.5	605
	0.049	603.5	609	603
	0.05	602.5	610.5	606.5
	0.051	606	610	603
	0.052	606.5	611	605.5
	0.053	605.5	607	603.5
	0.054	603	610	602
	0.055	604	603.5	606
	0.056	604	605	602
	0.057	605.5	607.5	604
	0.058	606.5	609	603.5
	0.059	605.5	610.5	606
	0.06	606	607.5	604.5
	0.061	608	607.5	606.5
	0.062	604.5	607.5	607
	0.063	608.5	606.5	603.5
	0.064	607.5	612.5	605.5
	0.065	605	609.5	602
	0.066	608.5	614	604.5
	0.067	607	609	602
	0.068	607	609	606
	0.069	606.5	608	602.5
	0.07	608	606.5	601.5
	0.071	608.5	610	604.5
	0.072	611	610.5	603
	0.073	607.5	611	603.5
	0.074	614.5	609	606
	0.075	610	610	608
	0.076	608	613.5	604.5
	0.077	611	610	605
	0.078	609	612.5	606
	0.079	608.5	613	605
	0.08	610.5	614	606.5
	0.081	611	609	603
	0.082	609	609	609.5
	0.083	611	611	605
	0.084	611	614	606.5
	0.085	610.5	611	607.5
	0.086	610.5	611	606
	0.087	610	613	608
	0.088	611	609.5	609
	0.089	611	614	610.5
	0.09	610	611	608.5
	0.091	611	615	606
	0.092	609.5	611	609
	0.093	608.5	611	609
	0.094	609	611	611
	0.095	611	611	611
	0.096	610.5	615	609
	0.097	609	611	611
	0.098	607.5	613	610
	0.099	608	613	609
	0.1	612.5	613	610.5
	0.101	607	611	611
	0.102	611	611	610.5
	0.103	610.5	614.5	610.5
	0.104	610.5	615.5	610
	0.105	608	612.5	608.5
	0.106	610	609	608.5
	0.107	610	613.5	611
	0.108	606	613	611
	0.109	608.5	613	609
	0.11	607.5	611	614
	0.111	606	614	613.5
	0.112	610	611	611
	0.113	606	611	611
	0.114	608.5	613	609
	0.115	608.5	611	609.5
	0.116	607	610	609.5
	0.117	606.5	615	613
	0.118	610	613	611
	0.119	608	612.5	613.5
	0.12	608.5	610	614.5
	0.121	607	608	611
	0.122	606	609	614
	0.123	607.5	609.5	613.5
	0.124	605.5	608.5	613.5
	0.125	609	607	614.5
	0.126	609.5	608	613.5
	0.127	608	609.5	611
	0.128	605	611	610
	0.129	602.5	608	608.5
	0.13	606.5	608.5	610
	0.131	609.5	609	614
	0.132	608.5	608.5	611
	0.133	605	607.5	609.5
	0.134	606.5	604	611
	0.135	609.5	607.5	608.5
	0.136	607.5	609	605.5
	0.137	611	609	614.5
	0.138	604	608.5	615
	0.139	606.5	608.5	611
	0.14	611	604.5	610.5
	0.141	606.5	611	611
	0.142	607.5	607	611
	0.143	610	607.5	607.5
	0.144	611	603.5	608.5
	0.145	606.5	606	609
	0.146	610	608.5	607
	0.147	611	605.5	608.5
	0.148	609	607.5	610.5
	0.149	606.5	608	607.5
	0.15	610.5	606.5	608.5
	0.151	608.5	600.5	613
	0.152	611	606.5	608.5
	0.153	611	604.5	611
	0.154	608.5	606	607.5
	0.155	608	606	609.5
	0.156	615	608.5	607
	0.157	611	607.5	611
	0.158	613	607	608.5
	0.159	610.5	608.5	608
	0.16	613.5	603.5	607.5
	0.161	614.5	603.5	609
	0.162	614	603	606
	0.163	611	604.5	610.5
	0.164	611	607	607
	0.165	612	603	607.5
	0.166	617.5	604.5	609
	0.167	613	603	609.5
	0.168	616	601.5	611
	0.169	613.5	608.5	608.5
	0.17	609	605.5	609
	0.171	612	604.5	609.5
	0.172	611	606	608.5
	0.173	613	608.5	606
	0.174	610.5	608	608.5
	0.175	613	608	609
	0.176	613	606.5	606.5
	0.177	616	605	606.5
	0.178	615.5	606	610
	0.179	615	605	607.5
	0.18	614	606	610
	0.181	613	609	605
	0.182	615	609	608
	0.183	611	606.5	607.5
	0.184	611	606.5	606.5
	0.185	611	607.5	608
	0.186	614.5	607.5	606.5
	0.187	615.5	606.5	608
	0.188	616	611	607
	0.189	617	611	609
	0.19	613.5	609	610
	0.191	615.5	606.5	609.5
	0.192	616.5	606	613.5
	0.193	613.5	610.5	608.5
	0.194	615.5	610	608.5
	0.195	611	610	607
	0.196	617.5	608.5	608.5
	0.197	615.5	608.5	608
	0.198	615.5	609	608.5
	0.199	614.5	610	608.5
	0.2	615	608.5	614.5
	0.201	614.5	608.5	611
	0.202	616.5	607	609.5
	0.203	613	610	612.5
	0.204	615.5	611	611
	0.205	617	607	608
	0.206	615.5	610	608.5
	0.207	611	611	608.5
	0.208	616	607.5	611
	0.209	616	613	610
	0.21	615.5	610.5	611
	0.211	612.5	610.5	612.5
	0.212	615.5	607.5	612.5
	0.213	615	609	609.5
	0.214	613.5	611	611
	0.215	616.5	610.5	608.5
	0.216	615	609	610
	0.217	614	610	611
	0.218	613	608	608
	0.219	615	608.5	610.5
	0.22	615	610.5	607.5
	0.221	616.5	609.5	608
	0.222	613	609	608.5
	0.223	613.5	607	611
	0.224	612.5	608.5	610
	0.225	616	606	611
	0.226	613	608.5	608
	0.227	615.5	609.5	608
	0.228	615	609.5	607
	0.229	611	608.5	608.5
	0.23	614	607.5	607.5
	0.231	613	610.5	607
	0.232	614	610.5	608.5
	0.233	613	609.5	608.5
	0.234	609.5	608.5	610.5
	0.235	613	610.5	607.5
	0.236	611	609	609.5
	0.237	610	608.5	608.5
	0.238	610.5	606.5	610
	0.239	609.5	610	608.5
	0.24	614	609	607
	0.241	610	608	608.5
	0.242	615	611	608.5
	0.243	608.5	606.5	608.5
	0.244	611	606.5	605.5
	0.245	613	605.5	606
	0.246	615.5	609	611
	0.247	610.5	610	607
	0.248	610	607.5	609
	0.249	610	610.5	609.5
	0.25	610.5	611	607.5
	0.251	611	611	611
	0.252	610.5	610.5	606
	0.253	611	606.5	607
	0.254	608.5	611	607
	0.255	613.5	612.5	608.5
	0.256	613.5	609	611
	0.257	614	607.5	609
	0.258	611	611	607
	0.259	615.5	610.5	608
	0.26	615	608.5	606
	0.261	611	610.5	609
	0.262	614.5	610	606
	0.263	612.5	609	607.5
	0.264	614.5	611	610
	0.265	615.5	611	610.5
	0.266	611	613.5	609
	0.267	614	610	609.5
	0.268	612.5	610.5	608
	0.269	611	610	611
	0.27	615.5	609	609.5
	0.271	617.5	611	608.5
	0.272	611	611	608.5
	0.273	615.5	611	609
	0.274	613.5	610.5	609
	0.275	615	607.5	613
	0.276	611	614	610.5
	0.277	611	610.5	608.5
	0.278	613	615	609.5
	0.279	613.5	611	611
	0.28	613	612.5	611
	0.281	611	611	608
	0.282	614	613	608.5
	0.283	613.5	611	613
	0.284	614	607	610.5
	0.285	614.5	611	611
	0.286	611	613	615.5
	0.287	616	614.5	610
	0.288	614	615	610.5
	0.289	611	615.5	611
	0.29	617	611	612.5
	0.291	616	614	614
	0.292	614	614	610.5
	0.293	615	611	615
	0.294	616.5	611	610
	0.295	615	611	608.5
	0.296	616.5	614	616.5
	0.297	613	611	613
	0.298	615.5	615.5	611
	0.299	615.5	613	614
	0.3	617	612.5	613.5
	0.301	618	614.5	614.5
	0.302	619.5	611	611
	0.303	615	611	613.5
	0.304	617.5	611	611
	0.305	617	613	616
	0.306	617	614.5	611
	0.307	616.5	611	613.5
	0.308	614.5	611	611
	0.309	617	613.5	610
	0.31	614.5	610.5	613.5
	0.311	618	611	613
	0.312	617	610	613.5
	0.313	615	610	615
	0.314	620	608.5	611
	0.315	615	608.5	608
	0.316	618	612.5	610
	0.317	617	611	607.5
	0.318	616	610.5	611
	0.319	616.5	608.5	610.5
	0.32	617.5	607	607
	0.321	618.5	610.5	609
	0.322	619	610	610.5
	0.323	616.5	610.5	607.5
	0.324	615.5	609.5	608.5
	0.325	615.5	608.5	608.5
	0.326	617	608.5	609
	0.327	616	605	607.5
	0.328	614.5	613.5	608
	0.329	617.5	611	611
	0.33	617	604.5	603.5
	0.331	615.5	608.5	604
	0.332	617	610.5	608.5
	0.333	615	609	608.5
	0.334	616	605.5	604.5
	0.335	616.5	607.5	606
	0.336	614.5	607	604
	0.337	615.5	607.5	605.5
	0.338	615	606	604
	0.339	618	611	605.5
	0.34	614	607	604.5
	0.341	616	607.5	605.5
	0.342	613	606.5	600
	0.343	609.5	607	609
	0.344	617.5	607	604
	0.345	615.5	606	604.5
	0.346	615.5	605.5	605
	0.347	614	602.5	606
	0.348	610.5	606.5	606
	0.349	611	604.5	604
	0.35	613	606	606.5
	0.351	609	605	606.5
	0.352	609.5	606.5	603.5
	0.353	611	608.5	605.5
	0.354	609	608.5	603
	0.355	610.5	604	604
	0.356	609	606	608.5
	0.357	606.5	608	601
	0.358	611	606.5	606.5
	0.359	605.5	606.5	605
	0.36	607.5	608.5	603.5
	0.361	607.5	603.5	604.5
	0.362	602	604.5	609
	0.363	607.5	609	604.5
	0.364	606	607.5	606
	0.365	604.5	605.5	606.5
	0.366	604.5	607	605
	0.367	601.5	608.5	607.5
	0.368	600	609	605
	0.369	602.5	608	606.5
	0.37	600	607.5	604.5
	0.371	598.5	609	610.5
	0.372	596	609	608.5
	0.373	598.5	609	610
	0.374	598	609.5	608.5
	0.375	597.5	608.5	609
	0.376	596	610.5	607.5
	0.377	596	611	608
	0.378	592	607.5	609.5
	0.379	591.5	609.5	609.5
	0.38	593	611	610
	0.381	594.5	607	608.5
	0.382	592	608.5	611
	0.383	590	607	608.5
	0.384	590.5	610	609
	0.385	588.5	608.5	614
	0.386	588.5	609	607.5
	0.387	587	609	610.5
	0.388	590	611	608
	0.389	585	610	610
	0.39	586	611	613
	0.391	583	608.5	611
	0.392	584.5	608.5	611
	0.393	584.5	614.5	611
	0.394	582.5	609.5	611
	0.395	581	613	611
	0.396	585	611	610.5
	0.397	586.5	608.5	613
	0.398	586.5	611	615.5
	0.399	581	613	613.5
	0.4	584	613	610.5
	0.401	581	608.5	611
	0.402	581	611	613.5
	0.403	583.5	614	610
	0.404	582.5	612	614.5
	0.405	582.5	610.5	611
	0.406	584	613	611
	0.407	579.5	616	611
	0.408	582	610	611
	0.409	582	611	614.5
	0.41	585	610	612
	0.411	585	613	610
	0.412	578	611	613.5
	0.413	580.5	609	611
	0.414	581	608.5	614
	0.415	580.5	612.5	609.5
	0.416	585	608.5	614
	0.417	584.5	610	614
	0.418	583	610	615.5
	0.419	587.5	610.5	610
	0.42	585	615.5	612.5
	0.421	585	609	613.5
	0.422	585.5	608.5	609
	0.423	585.5	610	615
	0.424	583	607	612
	0.425	585.5	613	610.5
	0.426	588	608	611
	0.427	587.5	610	609
	0.428	589.5	610	610.5
	0.429	588	611	611
	0.43	585.5	610	611
	0.431	588.5	611	611
	0.432	588	611	611
	0.433	588.5	609.5	611
	0.434	588	610	610
	0.435	594.5	609.5	607
	0.436	587.5	608.5	609
	0.437	589	610	610.5
	0.438	592.5	605.5	609.5
	0.439	589.5	610	608
	0.44	589.5	607.5	608.5
	0.441	593.5	605.5	611
	0.442	591	605	607
	0.443	595	608	607.5
	0.444	594	608.5	608
	0.445	592.5	608.5	611
	0.446	598	605.5	611
	0.447	596	607.5	606.5
	0.448	596	610	607.5
	0.449	594.5	610	610
	0.45	596	607	609.5
	0.451	595	610.5	610
	0.452	601	606.5	611
	0.453	598.5	608.5	611
	0.454	596	609.5	609
	0.455	596	611	611
	0.456	600	608.5	608.5
	0.457	601.5	607	613
	0.458	598.5	608.5	614
	0.459	601.5	609	607
	0.46	602	608.5	614
	0.461	602.5	607.5	611
	0.462	603.5	605.5	609
	0.463	604.5	608.5	611
	0.464	606	607	605.5
	0.465	606	608	609
	0.466	603.5	611	613
	0.467	605.5	611	612.5
	0.468	606	609	611
	0.469	608.5	609	606.5
	0.47	608	610	613
	0.471	609.5	604	611
	0.472	608	609.5	607
	0.473	611	609.5	611
	0.474	611	607.5	609.5
	0.475	611	606.5	613
	0.476	611	610	610
	0.477	615.5	608.5	611
	0.478	611	611	610
	0.479	616.5	610.5	613
	0.48	616	608.5	615
	0.481	616	611	612.5
	0.482	617	607.5	611
	0.483	617.5	611	611
	0.484	622	611	610.5
	0.485	619.5	611	611
	0.486	620	610.5	609
	0.487	622	614	613
	0.488	623	609.5	613.5
	0.489	622	609	613.5
	0.49	625	610	612.5
	0.491	623.5	610	609.5
	0.492	624	610.5	610
	0.493	627.5	611	614
	0.494	626	614	614
	0.495	629.5	608.5	614.5
	0.496	629.5	611	611
	0.497	633.5	608	610.5
	0.498	630.5	610	608.5
	0.499	630.5	609.5	609.5
	0.5	632.5	609	610.5
	0.501	632.5	611	613
	0.502	633.5	610	613
	0.503	635	611	609.5
	0.504	639	608.5	611
	0.505	636	611	611
	0.506	637	607	611
	0.507	636	612.5	609.5
	0.508	634.5	610	611
	0.509	639.5	607	609
	0.51	638.5	608.5	608.5
	0.511	640	609	608
	0.512	639.5	609.5	609.5
	0.513	643	607	607.5
	0.514	637	606.5	607.5
	0.515	637.5	606	608.5
	0.516	639	608.5	609.5
	0.517	641	607	606
	0.518	641	610.5	611
	0.519	637	607.5	606
	0.52	644.5	608.5	607
	0.521	641	609	606.5
	0.522	642.5	609	607.5
	0.523	640.5	605.5	606.5
	0.524	643	609.5	610
	0.525	638.5	606.5	608.5
	0.526	637	607.5	605
	0.527	638.5	606	607
	0.528	637	608.5	608.5
	0.529	636.5	607.5	604.5
	0.53	639	608.5	608.5
	0.531	636.5	606	607.5
	0.532	639	609	605
	0.533	636	608	605.5
	0.534	637	606.5	608.5
	0.535	636	611	605.5
	0.536	634	607.5	609
	0.537	634.5	607	606.5
	0.538	632.5	607.5	607
	0.539	633	610	606
	0.54	634	608.5	605.5
	0.541	628	609.5	606
	0.542	629	605	606.5
	0.543	628.5	609	606.5
	0.544	630.5	609	607.5
	0.545	629	606.5	605.5
	0.546	626	607.5	604.5
	0.547	627.5	608.5	609
	0.548	625.5	609	607
	0.549	626	607	607.5
	0.55	624	609.5	606
	0.551	622	611	609
	0.552	622	608.5	601.5
	0.553	619.5	609.5	606.5
	0.554	622	608.5	609
	0.555	622	611	607.5
	0.556	618.5	606.5	608.5
	0.557	617	611	605.5
	0.558	614.5	610	607.5
	0.559	617.5	609	607.5
	0.56	611	611	608.5
	0.561	610.5	608.5	608.5
	0.562	610	610.5	607.5
	0.563	610.5	609	607
	0.564	609.5	613	604.5
	0.565	610	611	607
	0.566	607.5	610	608.5
	0.567	608.5	611	609
	0.568	607.5	608.5	605
	0.569	603.5	606	607.5
	0.57	603	609	607.5
	0.571	604.5	608.5	610.5
	0.572	601.5	610	608.5
	0.573	602	611	614
	0.574	601.5	608.5	611
	0.575	601.5	611	611
	0.576	598	609.5	609
	0.577	603	609	608.5
	0.578	596	612.5	609
	0.579	598	610.5	614
	0.58	598.5	610	611
	0.581	596	611	614
	0.582	598	611	611
	0.583	595	608.5	608.5
	0.584	598.5	614	611
	0.585	595	610.5	614
	0.586	598	609.5	613.5
	0.587	595	611	612.5
	0.588	600	611	611
	0.589	596	609	618
	0.59	600	610.5	612.5
	0.591	596	614.5	614
	0.592	598	611	613
	0.593	596	611	614.5
	0.594	599	609	613.5
	0.595	601.5	611	614
	0.596	599	608.5	613
	0.597	601.5	611	610
	0.598	602.5	611	613
	0.599	603.5	610.5	611
	0.6	606.5	610.5	614.5
	0.601	603	614	611
	0.602	603.5	610.5	614.5
	0.603	603	609.5	613
	0.604	606.5	613.5	612.5
	0.605	602.5	613	611
	0.606	607	611	611
	0.607	608.5	611	614
	0.608	609	610.5	615
	0.609	607.5	614	611
	0.61	606.5	615	610.5
	0.611	609.5	609	609.5
	0.612	610	610	611
	0.613	611	609.5	611
	0.614	611	613	614
	0.615	611	610	613
	0.616	615	610	610
	0.617	613.5	610.5	613.5
	0.618	615.5	609	608.5
	0.619	613.5	611	609.5
	0.62	614	608	613
	0.621	614.5	608.5	609.5
	0.622	614.5	609	610
	0.623	611	611	609
	0.624	611	609	611
	0.625	616	610	608.5
	0.626	613	608.5	608.5
	0.627	615	608	611
	0.628	613	609.5	609
	0.629	611	611	609.5
	0.63	613.5	608.5	608.5
	0.631	613.5	611	608.5
	0.632	613	611	610
	0.633	615.5	610	605.5
	0.634	616	607	609
	0.635	616	607	608.5
	0.636	612	607	610
	0.637	615.5	607.5	610
	0.638	615.5	609	611
	0.639	611	609	609
	0.64	613.5	606	605
	0.641	613.5	613	608.5
	0.642	611	611	606.5
	0.643	611	610	610.5
	0.644	613.5	607	611
	0.645	611	608.5	607
	0.646	615.5	608.5	609.5
	0.647	613.5	609	605.5
	0.648	611	611	610
	0.649	614	609	606.5
	0.65	612.5	611	608
	0.651	608.5	608.5	608.5
	0.652	609	609.5	603.5
	0.653	609	606	607.5
	0.654	610	608	607
	0.655	613.5	609	605.5
	0.656	608.5	611	607
	0.657	611	606.5	609
	0.658	611	612.5	607
	0.659	610	610.5	607.5
	0.66	611	604.5	608.5
	0.661	610.5	608.5	609
	0.662	611	610	607.5
	0.663	608.5	607.5	606
	0.664	609.5	608.5	607.5
	0.665	611	606.5	609
	0.666	609	607.5	608
	0.667	611	608.5	603.5
	0.668	611	606.5	607
	0.669	608.5	609.5	607.5
	0.67	609	607.5	609
	0.671	608.5	608.5	606.5
	0.672	609.5	611	611
	0.673	611	605	608.5
	0.674	613.5	607	610.5
	0.675	615.5	610	612.5
	0.676	611	610.5	610.5
	0.677	613	610	610
	0.678	609.5	610	610
	0.679	611	610	609.5
	0.68	611	607	611
	0.681	609.5	609	609.5
	0.682	615	608	611
	0.683	609.5	609.5	609.5
	0.684	615	605.5	609
	0.685	613	607.5	611
	0.686	611	609.5	610.5
	0.687	613.5	609.5	609.5
	0.688	611	605.5	610.5
	0.689	610.5	603.5	611
	0.69	615	609	611
	0.691	614.5	611	611
	0.692	612	608.5	614
	0.693	613	610.5	612.5
	0.694	611	611	613
	0.695	611	611	614
	0.696	611	609.5	611
	0.697	611	610.5	613
	0.698	613.5	605.5	615.5
	0.699	610	609.5	616.5
	0.7	613	611	613
	0.701	613	609	609
	0.702	615	610	615
	0.703	614.5	609.5	611
	0.704	614.5	608.5	610
	0.705	607.5	610.5	611
	0.706	618.5	606.5	611
	0.707	616	610.5	611
	0.708	616	608.5	609.5
	0.709	615	610.5	611
	0.71	613.5	610.5	612.5
	0.711	615	611	611
	0.712	614	608.5	612.5
	0.713	610	610	610
	0.714	613.5	609	609
	0.715	611	607	611
	0.716	611	609.5	611
	0.717	614	609	611
	0.718	611	609	609.5
	0.719	613	607.5	610
	0.72	611	608.5	608.5
	0.721	610	606	609.5
	0.722	614	607	611
	0.723	609	609.5	609
	0.724	611	607.5	608.5
	0.725	608.5	609.5	610
	0.726	608	608.5	612.5
	0.727	611	609	611
	0.728	606.5	607.5	609
	0.729	605.5	608.5	609.5
	0.73	605	605.5	606.5
	0.731	608.5	608	608.5
	0.732	610.5	604.5	608.5
	0.733	609.5	607	608.5
	0.734	606	607.5	608
	0.735	609.5	607.5	610.5
	0.736	606	608.5	606
	0.737	609	603	607.5
	0.738	608	606.5	606
	0.739	607	605.5	606
	0.74	608.5	608	605
	0.741	608.5	607.5	608.5
	0.742	609	609.5	609
	0.743	605	602.5	606
	0.744	608.5	607	604.5
	0.745	608.5	606	607.5
	0.746	607.5	606	604.5
	0.747	609	608.5	608
	0.748	609	608	603.5
	0.749	609	604	604.5
	0.75	610.5	605	605.5
	0.751	606	606	604
	0.752	609.5	608.5	608.5
	0.753	606.5	609.5	604
	0.754	605	608.5	606
	0.755	607.5	610.5	608
	0.756	605	608	608
	0.757	605	608.5	605
	0.758	605.5	608.5	605.5
	0.759	607	610.5	607
	0.76	607	604	606.5
	0.761	604.5	612.5	608.5
	0.762	601.5	610.5	608.5
	0.763	607	609.5	610
	0.764	608.5	611	608.5
	0.765	607.5	608.5	610
	0.766	608.5	610	605
	0.767	608.5	611	605.5
	0.768	607	609	606.5
	0.769	602.5	609	606
	0.77	606.5	606.5	605.5
	0.771	603.5	606.5	607
	0.772	604.5	607	606.5
	0.773	606.5	608.5	609.5
	0.774	603.5	610.5	606.5
	0.775	607	608	609.5
	0.776	603.5	611	608.5
	0.777	607.5	607.5	608
	0.778	607	606.5	609
	0.779	606.5	615.5	610
	0.78	604.5	611	609.5
	0.781	605	609.5	610
	0.782	606.5	610.5	610
	0.783	605.5	611	610.5
	0.784	603	609	611
	0.785	606	611	611
	0.786	607	610	611
	0.787	607	611	611
	0.788	607	610.5	612.5
	0.789	609.5	608.5	611
	0.79	606	613.5	615
	0.791	608.5	610.5	610.5
	0.792	605.5	614.5	611
	0.793	605.5	613	616.5
	0.794	605.5	610	615
	0.795	607	613	614.5
	0.796	608	611	611
	0.797	610	612	613
	0.798	604.5	614.5	617
	0.799	607.5	613.5	611
	0.8	607.5	615.5	615
	0.801	610	611	613.5
	0.802	609	613	614
	0.803	608.5	611	615.5
	0.804	608.5	613	615
	0.805	608	613.5	610
	0.806	606	614.5	614.5
	0.807	608.5	611	615
	0.808	603.5	613.5	613.5
	0.809	609.5	611	615.5
	0.81	607	611	615
	0.811	609.5	611	613.5
	0.812	605.5	610	616
	0.813	605.5	611	610.5
	0.814	608.5	610.5	614
	0.815	608.5	611	614
	0.816	607.5	613	611
	0.817	612	608	611
	0.818	608.5	608.5	610
	0.819	607	611	608
	0.82	607	611	611
	0.821	610	610	610
	0.822	609	611	611
	0.823	608.5	609	611
	0.824	606	610	610
	0.825	608.5	609.5	611
	0.826	608	609	611
	0.827	608.5	611	607
	0.828	608	609	608.5
	0.829	606	610	611
	0.83	606.5	610.5	610.5
	0.831	608.5	608.5	610.5
	0.832	606.5	608.5	611
	0.833	605	609	605.5
	0.834	605.5	608.5	606.5
	0.835	604.5	608.5	607
	0.836	611	609	607.5
	0.837	610	605.5	605.5
	0.838	606.5	608.5	608.5
	0.839	608	608.5	605.5
	0.84	608.5	608.5	606.5
	0.841	606	607	606.5
	0.842	605	608.5	608.5
	0.843	609	607	604
	0.844	607	606.5	606
	0.845	608	606	605
	0.846	607	610	607
	0.847	607.5	607.5	602
	0.848	607	606.5	604.5
	0.849	610.5	607.5	602.5
	0.85	608.5	609	608.5
	0.851	608	605.5	606.5
	0.852	608.5	611	604.5
	0.853	606	608.5	601.5
	0.854	608	608.5	602.5
	0.855	607.5	608.5	605
	0.856	607.5	608.5	603
	0.857	610	606.5	603
	0.858	608	608.5	605
	0.859	606.5	610	602.5
	0.86	608.5	609.5	600
	0.861	607	608	600.5
	0.862	610.5	611	603.5
	0.863	609	609.5	606
	0.864	610.5	609	601
	0.865	610.5	609	603.5
	0.866	606.5	609.5	606
	0.867	608.5	608	601.5
	0.868	608	610	604.5
	0.869	608	608.5	605
	0.87	606.5	611	602.5
	0.871	608.5	610	603.5
	0.872	606	607	603.5
	0.873	609	607.5	603
	0.874	607.5	611	606.5
	0.875	610.5	606	602
	0.876	610.5	610.5	608
	0.877	610.5	608.5	608.5
	0.878	607.5	609	608.5
	0.879	608	608	604.5
	0.88	610	606.5	602.5
	0.881	608	613	608.5
	0.882	609	608.5	609.5
	0.883	606.5	611	608.5
	0.884	607.5	606.5	605.5
	0.885	608.5	608.5	607.5
	0.886	610	609.5	608.5
	0.887	608	610	607
	0.888	609.5	608	611
	0.889	609	608.5	609.5
	0.89	604	609	608.5
	0.891	611	610.5	609.5
	0.892	610	610	611
	0.893	606	611	609
	0.894	610	612	611
	0.895	606.5	611	611
	0.896	609	611	610.5
	0.897	608.5	609.5	613.5
	0.898	609.5	611	611
	0.899	608.5	611	611
	0.9	609	611	613.5
	0.901	605.5	614	616
	0.902	610	608.5	614.5
	0.903	608.5	614.5	611
	0.904	607.5	608	613.5
	0.905	609	611	612
	0.906	606.5	611	614
	0.907	609.5	610.5	615.5
	0.908	606.5	611	615
	0.909	605	613	614
	0.91	607	610	613
	0.911	606.5	611	611
	0.912	603.5	611	611
	0.913	603.5	612.5	610
	0.914	605.5	607.5	614
	0.915	605.5	613	609.5
	0.916	609.5	608.5	611
	0.917	607.5	610	613
	0.918	608.5	609.5	610
	0.919	609	610.5	611
	0.92	607.5	609	611
	0.921	608	607.5	611
	0.922	605	608.5	614.5
	0.923	607	610	611
	0.924	608.5	608.5	615
	0.925	610	610.5	610.5
	0.926	609	610	613.5
	0.927	608.5	611	608.5
	0.928	610	610	611
	0.929	611	608.5	610.5
	0.93	608	608.5	609
	0.931	611	608	613
	0.932	610	607	610.5
	0.933	611	608.5	608
	0.934	609.5	605	608.5
	0.935	609	603	610
	0.936	613	602	607.5
	0.937	611	609	607.5
	0.938	614.5	608	608
	0.939	611	608.5	610
	0.94	613.5	606	609.5
	0.941	611	608	607
	0.942	615.5	606.5	607.5
	0.943	614	609.5	607.5
	0.944	617.5	605.5	611
	0.945	608.5	604.5	605
	0.946	615	607	607.5
	0.947	615.5	610.5	607
	0.948	616	608	608.5
	0.949	615.5	607.5	605.5
	0.95	613	606.5	609.5
	0.951	613.5	604.5	609
	0.952	614	607.5	607.5
	0.953	614.5	604.5	607
	0.954	618	608.5	608
	0.955	613.5	609	609
	0.956	616.5	605	605.5
	0.957	614	605.5	607.5
	0.958	614.5	602.5	610.5
	0.959	615.5	606.5	607.5
	0.96	616.5	606.5	605.5
	0.961	616	605.5	608.5
	0.962	615.5	608.5	606
	0.963	616	608.5	606.5
	0.964	616	606.5	605
	0.965	615	604.5	608
	0.966	618	606.5	606
	0.967	614	608.5	608.5
	0.968	613	608.5	607.5
	0.969	615	604	607.5
	0.97	613	608.5	610.5
	0.971	614	607.5	606.5
	0.972	611	611	609.5
	0.973	613.5	608.5	607.5
	0.974	611	610	606
	0.975	615	608.5	609
	0.976	610.5	608.5	608
	0.977	611	608.5	609.5
	0.978	610.5	611	610
	0.979	610	611	609
	0.98	608.5	610.5	607
	0.981	607	615.5	610.5
	0.982	610	613.5	611
	0.983	609.5	611	606.5
	0.984	609	609.5	608
	0.985	608.5	610.5	609
	0.986	608.5	613.5	608.5
	0.987	605	613	609
	0.988	606.5	609	609.5
	0.989	607	612.5	609
	0.99	607	612	609
	0.991	607.5	615.5	608.5
	0.992	604.5	610.5	612
	0.993	605.5	611	609
	0.994	606.5	616.5	610
	0.995	606.5	611	611
	0.996	604.5	613	611
	0.997	603	615.5	612.5
	0.998	605	614.5	613
	0.999	608.5	614	608.5
	1	607.5	611	611
	1.001	610	613.5	613.5
	1.002	606.5	615	611
	1.003	608.5	616	613
	1.004	606.5	614	611
	1.005	607	616.5	614
	1.006	613.5	615.5	611
	1.007	611	614	613
	1.008	609	614.5	611
	1.009	614	614.5	612.5
	1.01	608.5	615.5	611
	1.011	614	611	611
	1.012	610.5	610.5	611
	1.013	614.5	613	613.5
	1.014	614	611	613
	1.015	614	613	611
	1.016	614	611	609.5
	1.017	613	614	614.5
	1.018	614	615.5	609.5
	1.019	616.5	608.5	613
	1.02	615	609	611
	1.021	615.5	611	610
	1.022	615.5	609	611
	1.023	618.5	610.5	611
	1.024	617.5	608.5	610
	1.025	617.5	608.5	608.5
	1.026	621.5	608.5	613
	1.027	622	608.5	611
	1.028	620	610.5	609.5
	1.029	616	608.5	613.5
	1.03	618	610.5	608.5
	1.031	615.5	608.5	611
	1.032	616	608.5	609.5
	1.033	617.5	606.5	612.5
	1.034	616	611	607.5
	1.035	616.5	608.5	607
	1.036	618	607	608
	1.037	616.5	608	609.5
	1.038	619.5	605	606.5
	1.039	621.5	609	608.5
	1.04	617.5	604.5	602
	1.041	619.5	605.5	603.5
	1.042	617	606	607
	1.043	617	603	603.5
	1.044	618.5	605	605.5
	1.045	621	601.5	605.5
	1.046	619	606.5	605.5
	1.047	615.5	603.5	608.5
	1.048	614.5	607.5	603.5
	1.049	620.5	606	607.5
	1.05	615.5	603.5	606.5
	1.051	618.5	605.5	607.5
	1.052	619.5	604.5	607.5
	1.053	613.5	606	605.5
	1.054	613.5	606	605.5
	1.055	616	602.5	604
	1.056	613.5	605	600.5
	1.057	614.5	603.5	605
	1.058	615	605	604
	1.059	616	605	603.5
	1.06	614.5	605	604.5
	1.061	614	606	605.5
	1.062	609.5	605.5	607.5
	1.063	610.5	607.5	604
	1.064	615.5	603.5	608
	1.065	614.5	604.5	603.5
	1.066	614	608.5	604
	1.067	610.5	604.5	604
	1.068	611	605.5	604.5
	1.069	610	603	602.5
	1.07	611	608.5	607
	1.071	613	607.5	603.5
	1.072	608.5	609	605
	1.073	611	609	607
	1.074	608.5	607	603.5
	1.075	611	607.5	603
	1.076	607.5	610.5	604.5
	1.077	611	611	605.5
	1.078	610.5	608.5	607.5
	1.079	609.5	608	607
	1.08	614	609	606.5
	1.081	608.5	611	607.5
	1.082	608.5	611	608.5
	1.083	609.5	611	609
	1.084	606.5	609.5	607
	1.085	605	611	608.5
	1.086	608	613	604.5
	1.087	605	611	611
	1.088	605	613	606.5
	1.089	607	613	608.5
	1.09	603.5	613.5	610.5
	1.091	608	611	609.5
	1.092	605.5	610	614
	1.093	602	611	611
	1.094	602.5	612	611
	1.095	606	611	610.5
	1.096	604.5	613	607.5
	1.097	605.5	616	610
	1.098	602.5	611	611
	1.099	603	614.5	614
	1.1	606	613	614.5
	1.101	606.5	613.5	613
	1.102	601.5	616	609.5
	1.103	605	615.5	611
	1.104	603	614.5	611
	1.105	602	611	610
	1.106	608	615	615
	1.107	605.5	613.5	609
	1.108	604	615.5	613
	1.109	604.5	616	613.5
	1.11	606.5	615	612.5
	1.111	608.5	615.5	614
	1.112	605	617	610
	1.113	606.5	614	613.5
	1.114	609	613.5	614.5
	1.115	606	615.5	611
	1.116	608.5	611	610
	1.117	604.5	615.5	611
	1.118	606.5	611	614.5
	1.119	606	611	612.5
	1.12	606	611	610
	1.121	607	614.5	611
	1.122	608.5	611	611
	1.123	605.5	611	611
	1.124	607.5	613.5	610.5
	1.125	605.5	610	611
	1.126	611	610.5	611
	1.127	608	611	611
	1.128	609	609.5	609
	1.129	609	609.5	613.5
	1.13	609	611	609
	1.131	612.5	615	613.5
	1.132	611	611	608
	1.133	613.5	612.5	613.5
	1.134	611	608.5	608.5
	1.135	609.5	608.5	610.5
	1.136	611	611	610.5
	1.137	610	607	609.5
	1.138	608	607	608.5
	1.139	610.5	608.5	609
	1.14	607.5	609	610.5
	1.141	609.5	611	610
	1.142	615.5	609.5	610.5
	1.143	610.5	608.5	610.5
	1.144	608.5	609	608
	1.145	610.5	608.5	604
	1.146	608.5	609.5	607
	1.147	613	610.5	608.5
	1.148	611	606	610.5
	1.149	607.5	607.5	606.5
	1.15	611	607	607
	1.151	610.5	608.5	608.5
	1.152	607	608	608.5
	1.153	611	608.5	608
	1.154	610	610	608.5
	1.155	608.5	603	605.5
	1.156	606	606.5	607
	1.157	611	607.5	608.5
	1.158	608.5	608.5	606
	1.159	612.5	602	608
	1.16	604	604.5	607.5
	1.161	611	605	606
	1.162	609.5	607	606.5
	1.163	607.5	605	608.5
	1.164	606.5	608.5	605.5
	1.165	608.5	605	607.5
	1.166	607.5	608.5	605.5
	1.167	607.5	603.5	604
	1.168	606.5	608.5	603.5
	1.169	608.5	608.5	606.5
	1.17	607.5	607.5	608.5
	1.171	611	606.5	607.5
	1.172	606.5	611	607
	1.173	608	607.5	605.5
	1.174	604	608.5	608.5
	1.175	608	607.5	606.5
	1.176	608	608	609.5
	1.177	605.5	611	606
	1.178	608.5	606.5	608.5
	1.179	606	610.5	608.5
	1.18	606	609	609.5
	1.181	608	611	607.5
	1.182	606.5	608.5	611
	1.183	607	610.5	609
	1.184	604.5	609.5	608.5
	1.185	606	610.5	614.5
	1.186	607.5	613.5	607
	1.187	606.5	608	610.5
	1.188	610.5	609	614.5
	1.189	608	608.5	611
	1.19	608.5	608.5	611
	1.191	607.5	611	610.5
	1.192	606	611	610.5
	1.193	606.5	611	613
	1.194	608.5	609	611
	1.195	609.5	613.5	614
	1.196	606.5	614	611
	1.197	607.5	613.5	611
	1.198	608.5	608.5	615
	1.199	607	611	615
	1.2	606	613	615.5
	1.201	607.5	610	611
	1.202	606.5	611	615
	1.203	607.5	611	615.5
	1.204	606	609.5	616.5
	1.205	608.5	611	610
	1.206	607	611	616
	1.207	607.5	610	610.5
	1.208	608.5	615	614
	1.209	605.5	609	614
	1.21	608.5	613.5	617.5
	1.211	604.5	611	613
	1.212	611	614	614
	1.213	609.5	614	615.5
	1.214	609.5	614.5	614
	1.215	610	609.5	616
	1.216	610	610	611
	1.217	611	609.5	614
	1.218	612.5	611	614
	1.219	610	610	614
	1.22	615.5	605.5	613
	1.221	615	611	612.5
	1.222	608.5	610.5	610.5
	1.223	614.5	608	609
	1.224	611	608.5	609
	1.225	615.5	611	613.5
	1.226	609.5	609	613.5
	1.227	614.5	607.5	610.5
	1.228	611	607.5	611
	1.229	611	610.5	607
	1.23	615.5	609	609.5
	1.231	615.5	603.5	613
	1.232	611	608	610.5
	1.233	617	605.5	614
	1.234	614.5	605.5	608.5
	1.235	615.5	606.5	607
	1.236	615	607.5	609
	1.237	616.5	607	611
	1.238	618	605.5	611
	1.239	615	608.5	609
	1.24	615	605.5	608.5
	1.241	618.5	604.5	610
	1.242	618.5	608	608.5
	1.243	614.5	606.5	606.5
	1.244	617.5	606	605.5
	1.245	618	603.5	607.5
	1.246	618	606.5	605.5
	1.247	615.5	607	609.5
	1.248	617.5	604.5	606
	1.249	615	603.5	605
	1.25	615.5	608.5	605.5
	1.251	615.5	602.5	605.5
	1.252	616.5	602	606.5
	1.253	618.5	605.5	611
	1.254	615.5	604.5	605.5
	1.255	618.5	604	608.5
	1.256	613.5	607.5	606.5
	1.257	616.5	602.5	605.5
	1.258	614	605.5	608.5
	1.259	616.5	607	608
	1.26	615	607	605.5
	1.261	615	606.5	606.5
	1.262	610.5	605.5	609
	1.263	615	608	610.5
	1.264	611	603.5	608.5
	1.265	610	604	607.5
	1.266	615	606.5	608
	1.267	613	606	609
	1.268	613.5	606.5	609.5
	1.269	611	609.5	611
	1.27	609.5	606.5	609.5
	1.271	611	605	608.5
	1.272	610.5	607.5	607
	1.273	611	609	608.5
	1.274	611	606.5	608.5
	1.275	609.5	609	610
	1.276	609	610	609.5
	1.277	608.5	608.5	607.5
	1.278	609	611	610.5
	1.279	606	611	610
	1.28	610	608.5	609
	1.281	609.5	610	612.5
	1.282	608.5	611	610.5
	1.283	609	608.5	608.5
	1.284	608	611	608.5
	1.285	608.5	608.5	609
	1.286	606.5	609.5	611
	1.287	608.5	609	615
	1.288	606.5	613.5	613
	1.289	609.5	612.5	611
	1.29	608.5	609.5	611
	1.291	610	611	613
	1.292	607.5	611	610.5
	1.293	606	611	611
	1.294	604.5	612.5	611
	1.295	605	613	610
	1.296	610	613.5	613
	1.297	607.5	614.5	611
	1.298	608.5	609	613.5
	1.299	608	611	610.5
	1.3	607	610	611
	1.301	607.5	616	613
	1.302	609	611	613.5
	1.303	608.5	613.5	611
	1.304	608.5	614	611
	1.305	607	609	611
	1.306	607.5	614.5	611
	1.307	610	615.5	608.5
	1.308	614	614.5	613
	1.309	609	614	614
	1.31	607	615.5	615
	1.311	611	613.5	611
	1.312	607	614.5	611
	1.313	609.5	611	609
	1.314	611	613	609.5
	1.315	613	611	613
	1.316	611	613	609.5
	1.317	614	611	609.5
	1.318	614	614	610
	1.319	611	613	609.5
	1.32	614.5	613.5	610
	1.321	613	611	611
	1.322	615	613	607.5
	1.323	614	610.5	612.5
	1.324	611	611	606.5
	1.325	615.5	610	610
	1.326	615.5	613	610.5
	1.327	615.5	607.5	608.5
	1.328	611	610.5	609
	1.329	612.5	608.5	606
	1.33	613	607.5	609
	1.331	617	609.5	609
	1.332	615.5	608.5	608.5
	1.333	613.5	608.5	607.5
	1.334	616	607.5	609.5
	1.335	611	609	611
	1.336	613.5	606.5	608.5
	1.337	608.5	608.5	608.5
	1.338	614.5	607	605.5
	1.339	613	606	609
	1.34	611	607.5	605.5
	1.341	611	607.5	606.5
	1.342	608.5	605.5	607.5
	1.343	611	609	608
	1.344	610.5	608	608
	1.345	608.5	608.5	603.5
	1.346	611	604.5	606
	1.347	610	608.5	603
	1.348	608.5	608.5	605
	1.349	609	607	604.5
	1.35	611	608.5	604.5
	1.351	607.5	608.5	605
	1.352	609.5	607	603.5
	1.353	611	607	607
	1.354	604	607	603.5
	1.355	611	608.5	604.5
	1.356	605.5	608	604.5
	1.357	602.5	607.5	604
	1.358	605.5	605	607.5
	1.359	605	604.5	606
	1.36	604.5	610	603.5
	1.361	606.5	606.5	605
	1.362	602.5	604	604.5
	1.363	603	608.5	606.5
	1.364	601.5	608	606.5
	1.365	603	610.5	601.5
	1.366	602.5	611	606
	1.367	601.5	608.5	606.5
	1.368	600.5	607	607
	1.369	598	606.5	607.5
	1.37	600	605.5	607.5
	1.371	604	608.5	608.5
	1.372	601.5	608.5	608.5
	1.373	599.5	608	608
	1.374	600	611	608
	1.375	600	611	607.5
	1.376	599.5	608.5	607
	1.377	599.5	610.5	608.5
	1.378	600	611	605.5
	1.379	596	609.5	609
	1.38	603	610	610.5
	1.381	601.5	611	609.5
	1.382	603.5	612	609
	1.383	600	611	611
	1.384	600	614	609.5
	1.385	601.5	609.5	610
	1.386	601.5	614.5	607.5
	1.387	602	611	609
	1.388	601.5	613	613.5
	1.389	601.5	609.5	609
	1.39	605	612.5	611
	1.391	605	616	611
	1.392	601.5	613.5	611
	1.393	605	618	611
	1.394	607	611	611
	1.395	608.5	610	613
	1.396	603.5	613	614
	1.397	606.5	614.5	610
	1.398	610	618	614
	1.399	608.5	613.5	615
	1.4	608.5	614.5	611
	1.401	611	611	611
	1.402	609	614.5	612.5
	1.403	611	614.5	613
	1.404	614	616.5	611
	1.405	611	612.5	611
	1.406	614	612.5	613.5
	1.407	614	616.5	613
	1.408	610	613	614
	1.409	614.5	610.5	611
	1.41	613	611	612.5
	1.411	615.5	614	612
	1.412	616.5	610.5	614.5
	1.413	616.5	616.5	611
	1.414	614.5	615	612.5
	1.415	617	609	611
	1.416	615.5	611	613
	1.417	615	608	609.5
	1.418	615.5	611	611
	1.419	615.5	611	609
	1.42	615	609	609.5
	1.421	616	607	605.5
	1.422	616.5	611	609
	1.423	617.5	609.5	613.5
	1.424	614.5	609.5	608.5
	1.425	619.5	610.5	611
	1.426	615.5	606.5	613.5
	1.427	616.5	605.5	611
	1.428	616	609	610.5
	1.429	616.5	608	610.5
	1.43	616	605	613.5
	1.431	615	609.5	609.5
	1.432	616.5	606.5	613.5
	1.433	616	605.5	610.5
	1.434	616.5	608.5	610.5
	1.435	616.5	605.5	611
	1.436	613.5	608.5	608.5
	1.437	616.5	606.5	608.5
	1.438	621	606	606
	1.439	618	602.5	608.5
	1.44	614	602	609.5
	1.441	615.5	605.5	607
	1.442	615	601.5	608.5
	1.443	611	607	607
	1.444	618	606	611
	1.445	611	603.5	606.5
	1.446	614.5	607.5	609
	1.447	611	606	608
	1.448	610.5	604.5	610
	1.449	615	605	608.5
	1.45	613.5	605	606.5
	1.451	616	605.5	608.5
	1.452	610.5	606	605
	1.453	611	604.5	607.5
	1.454	610.5	605	609
	1.455	613.5	607	606.5
	1.456	608.5	607	607.5
	1.457	608.5	604.5	610
	1.458	610	606.5	606
	1.459	610	607	609
	1.46	610	607.5	609.5
	1.461	609.5	609.5	609.5
	1.462	610	607.5	610.5
	1.463	609.5	610	609
	1.464	609	607	607.5
	1.465	609	610.5	610
	1.466	608.5	610	607.5
	1.467	607	610	604.5
	1.468	607	609.5	606
	1.469	605	607	609
	1.47	605.5	611	610
	1.471	605.5	610.5	609
	1.472	607.5	609	610
	1.473	604.5	611	606.5
	1.474	607.5	613	611
	1.475	607	611	608.5
	1.476	607	611	608.5
	1.477	606	608.5	612.5
	1.478	606	608.5	611
	1.479	608.5	611	609
	1.48	605	613.5	613
	1.481	607	610	615
	1.482	607.5	611	611
	1.483	608.5	614	613.5
	1.484	605	613.5	613.5
	1.485	607.5	614	614.5
	1.486	605	615.5	611
	1.487	605	615.5	611
	1.488	606.5	614	611
	1.489	608.5	613.5	611
	1.49	608.5	614	613
	1.491	610	617.5	611
	1.492	608	614	614.5
	1.493	608	614.5	613.5
	1.494	605	611	616
	1.495	608.5	617	616.5
	1.496	608.5	614	617
	1.497	611	616	617
	1.498	605.5	613.5	615.5
	1.499	607	616	620
	1.5	607.5	615.5	615.5
	1.501	613	614	615.5
	1.502	610	613.5	616
	1.503	609	613	614
	1.504	608	614.5	615.5
	1.505	611	615.5	618.5
	1.506	611	614.5	618.5
	1.507	610.5	613	616
	1.508	610.5	611	615.5
	1.509	611	613.5	616
	1.51	615	614.5	615.5
	1.511	611	611	617.5
	1.512	608.5	615.5	615.5
	1.513	610.5	610.5	619
	1.514	614.5	611	619.5
	1.515	610	615.5	617.5
	1.516	609	609	614.5
	1.517	615.5	608.5	619
	1.518	612.5	614.5	616.5
	1.519	614	610	616.5
	1.52	607	610.5	613
	1.521	610	608.5	615.5
	1.522	610	608	620
	1.523	615	608	617
	1.524	611	608.5	615.5
	1.525	611	611	613.5
	1.526	614	606	615.5
	1.527	611	607.5	613
	1.528	615.5	607	611
	1.529	613	606.5	614
	1.53	616	607	617.5
	1.531	614	606	612.5
	1.532	611	607.5	615.5
	1.533	611	607	611
	1.534	611	607.5	613.5
	1.535	614	605.5	614
	1.536	611	608	611
	1.537	615.5	607	611
	1.538	610	611	613
	1.539	608.5	607.5	611
	1.54	610.5	606	613.5
	1.541	610.5	606.5	613.5
	1.542	608.5	605.5	609.5
	1.543	608	605	608.5
	1.544	611	602.5	608.5
	1.545	610	605	610
	1.546	609	606.5	608.5
	1.547	610.5	608.5	611
	1.548	608.5	604	608.5
	1.549	608	607	609
	1.55	609	605	608
	1.551	606.5	604.5	611
	1.552	607.5	605.5	606.5
	1.553	608.5	605.5	606
	1.554	607.5	605.5	606.5
	1.555	606.5	607	605
	1.556	606.5	603	607
	1.557	608.5	606.5	607
	1.558	610	606.5	606.5
	1.559	609.5	607.5	604.5
	1.56	607.5	603.5	605
	1.561	609.5	605	606.5
	1.562	607.5	604.5	608.5
	1.563	608.5	606	610
	1.564	607	603	608.5
	1.565	608.5	603	611
	1.566	606	607	608.5
	1.567	607	605	605
	1.568	610	607.5	606.5
	1.569	611	605	607
	1.57	610.5	607.5	613.5
	1.571	608	608.5	607.5
	1.572	607.5	609.5	611
	1.573	610	610	611
	1.574	608	606.5	611
	1.575	607.5	609.5	613.5
	1.576	607.5	608.5	606.5
	1.577	611	610.5	612.5
	1.578	608.5	609.5	610
	1.579	607.5	610	611
	1.58	610.5	608.5	610
	1.581	608.5	608.5	611
	1.582	610.5	611	611
	1.583	608.5	610.5	613
	1.584	611	609.5	609.5
	1.585	614	614.5	618
	1.586	611	614	613.5
	1.587	611	615.5	615.5
	1.588	614	613	615.5
	1.589	614	613	615.5
	1.59	614	615.5	614
	1.591	612	613	615.5
	1.592	615	613	618.5
	1.593	612.5	615	616
	1.594	610	611	617.5
	1.595	611	611	615.5
	1.596	614.5	614	615.5
	1.597	611	616	617.5
	1.598	612.5	611	616.5
	1.599	615	615.5	617
	1.6	615	614.5	620.5
	1.601	611	614.5	617.5
	1.602	610	614	615.5
	1.603	616.5	617.5	619
	1.604	614.5	613	620
	1.605	615	616.5	620.5
	1.606	613	611	622.5
	1.607	615	611	620.5
	1.608	611	615.5	618
	1.609	616	611	623.5
	1.61	614.5	615	622
	1.611	614.5	614	621.5
	1.612	616	616	622
	1.613	614	615.5	624
	1.614	614	612.5	622.5
	1.615	611	612.5	621.5
	1.616	617	611	622.5
	1.617	615.5	614.5	622
	1.618	615.5	613.5	620
	1.619	615	611	618.5
	1.62	618.5	610	623.5
	1.621	613	613.5	620
	1.622	615.5	611	618.5
	1.623	615.5	609.5	622
	1.624	614	613	621
	1.625	615	610.5	619
	1.626	616	610	621.5
	1.627	614.5	611	620.5
	1.628	613	608.5	624
	1.629	613	611	621
	1.63	614	609.5	619
	1.631	611	608.5	620.5
	1.632	615.5	607.5	618
	1.633	614.5	608.5	622
	1.634	614	609	619
	1.635	614.5	608.5	621
	1.636	613.5	608	618
	1.637	613.5	608.5	621
	1.638	613.5	608.5	620
	1.639	614	608.5	618.5
	1.64	609	610	622.5
	1.641	611	606.5	618.5
	1.642	615.5	605.5	622
	1.643	610.5	607	621
	1.644	611	606	622
	1.645	610.5	608	618.5
	1.646	613	606	621.5
	1.647	610.5	603.5	619.5
	1.648	609	608	618.5
	1.649	609.5	606.5	618.5
	1.65	610.5	606.5	619
	1.651	609.5	605.5	620
	1.652	609	603.5	618
	1.653	610	605.5	617
	1.654	611	607	622.5
	1.655	607.5	605.5	617.5
	1.656	608.5	608.5	618
	1.657	613	606.5	618
	1.658	608	605	616.5
	1.659	605	605	617.5
	1.66	606	607.5	618.5
	1.661	605.5	608.5	616.5
	1.662	608	604.5	618.5
	1.663	606	604.5	616.5
	1.664	607	608.5	618.5
	1.665	611	606	622
	1.666	603.5	608.5	620
	1.667	607.5	607.5	615.5
	1.668	605	609	619.5
	1.669	608.5	604.5	617
	1.67	609	607.5	620.5
	1.671	608.5	605.5	622
	1.672	605.5	607	619.5
	1.673	611	607	619
	1.674	609	608.5	621.5
	1.675	608.5	607	618.5
	1.676	611	611	616.5
	1.677	613	613	623.5
	1.678	608	611	623
	1.679	611	608	622.5
	1.68	610.5	611	624
	1.681	611	609	624
	1.682	613	611	625
	1.683	609.5	609.5	627
	1.684	611	611	623.5
	1.685	611	613.5	622
	1.686	618	610.5	624.5
	1.687	614.5	611	626
	1.688	612.5	611	624
	1.689	613	611	625.5
	1.69	613	614	627
	1.691	613	613	624
	1.692	615.5	616	626
	1.693	614	615	626
	1.694	615	616	623
	1.695	617	613.5	622.5
	1.696	615.5	615.5	626
	1.697	616.5	616	626
	1.698	624	613	627
	1.699	619.5	613	626.5
	1.7	617.5	615.5	624
	1.701	620	617	626
	1.702	617.5	614	628.5
	1.703	618	615.5	628.5
	1.704	621	615.5	628.5
	1.705	619.5	615	625.5
	1.706	618	615	628.5
	1.707	618.5	611	630.5
	1.708	622.5	614.5	628
	1.709	620	614	628
	1.71	618	615.5	626
	1.711	622	611	629
	1.712	622	610.5	626
	1.713	620	613.5	628.5
	1.714	624.5	615.5	628
	1.715	622	611	629.5
	1.716	627	610.5	626
	1.717	621	610	626
	1.718	624.5	614	626
	1.719	622	611	626.5
	1.72	625	611	625.5
	1.721	624.5	611	624
	1.722	622.5	611	625.5
	1.723	625	610	622
	1.724	622	609.5	620.5
	1.725	623	606.5	621.5
	1.726	624	608.5	619.5
	1.727	628.5	608	619
	1.728	626	609.5	619.5
	1.729	623.5	607	617.5
	1.73	622.5	608.5	614.5
	1.731	627	607	614
	1.732	622	608	613
	1.733	627.5	604.5	612.5
	1.734	624	608.5	607.5
	1.735	623.5	603.5	611
	1.736	621.5	607.5	609
	1.737	625	605.5	608
	1.738	626	608	608.5
	1.739	625	603	606
	1.74	622.5	607	606
	1.741	623.5	606	601.5
	1.742	624.5	603	600
	1.743	627.5	603	595
	1.744	624	606	598.5
	1.745	622	604.5	592.5
	1.746	622	602.5	592.5
	1.747	625	605.5	589
	1.748	624	605.5	588
	1.749	624.5	607.5	587
	1.75	622.5	604.5	583.5
	1.751	621	607.5	585.5
	1.752	622.5	606.5	581
	1.753	624	606	578.5
	1.754	623	600.5	577.5
	1.755	623.5	603.5	572.5
	1.756	622.5	602.5	570.5
	1.757	622.5	605	568.5
	1.758	622.5	601.5	563.5
	1.759	626	603.5	560
	1.76	622	606	560
	1.761	622.5	603.5	556
	1.762	623	607	555
	1.763	620	608.5	550.5
	1.764	623	606.5	550.5
	1.765	622	602.5	543.5
	1.766	623	607.5	542
	1.767	621	605.5	536.5
	1.768	626	603	536
	1.769	628	607	533.5
	1.77	624.5	606.5	532
	1.771	623	608.5	523
	1.772	625	608.5	527.5
	1.773	622	605	516
	1.774	622	604.5	515
	1.775	624.5	607.5	511.5
	1.776	623	605.5	508
	1.777	623	608.5	505
	1.778	624.5	607.5	503
	1.779	622	606.5	496.5
	1.78	624	607.5	494
	1.781	621.5	607.5	488
	1.782	622	606.5	483.5
	1.783	624.5	608	479.5
	1.784	622.5	610	473
	1.785	623.5	608.5	470
	1.786	624	611	464
	1.787	626	609.5	459.5
	1.788	627	608.5	454
	1.789	622.5	609	451
	1.79	622	609.5	444
	1.791	622.5	614	437.5
	1.792	627	608.5	431.5
	1.793	626	608.5	431
	1.794	625	615	424.5
	1.795	624.5	614.5	420
	1.796	623	614.5	418
	1.797	627	613.5	407
	1.798	627	611	407.5
	1.799	624.5	611	405.5
	1.8	628.5	611	398
	1.801	624.5	613.5	396
	1.802	626	616	392.5
	1.803	625	611	390.5
	1.804	629	611	388.5
	1.805	629	615.5	383.5
	1.806	629.5	615	380.5
	1.807	630.5	614	376
	1.808	629.5	615.5	371
	1.809	628.5	615.5	369.5
	1.81	630	612.5	362.5
	1.811	628	615.5	361
	1.812	626	614.5	357.5
	1.813	627.5	614.5	351.5
	1.814	629.5	614	349.5
	1.815	629	610.5	347.5
	1.816	625.5	612.5	343.5
	1.817	629	615.5	336
	1.818	630.5	615	334
	1.819	630	615	330.5
	1.82	629	612.5	328
	1.821	629	615.5	327.5
	1.822	630.5	610.5	318
	1.823	629.5	615	317
	1.824	629	611	314
	1.825	632	610	310
	1.826	630.5	610	304.5
	1.827	630	610	293
	1.828	626	611	295
	1.829	630	610	291
	1.83	632	609	284
	1.831	629	610.5	282.5
	1.832	629.5	610.5	277
	1.833	629.5	607.5	272.5
	1.834	630	609	270
	1.835	630	607.5	268
	1.836	627.5	611	259.5
	1.837	626	613	258
	1.838	628	610.5	257.5
	1.839	628.5	610.5	250.5
	1.84	624.5	609	244
	1.841	627	609.5	242.5
	1.842	627	610.5	239.5
	1.843	628	608.5	232.5
	1.844	627	613.5	231.5
	1.845	628	608.5	224
	1.846	627.5	612.5	221.5
	1.847	624	609.5	213
	1.848	627.5	611	216
	1.849	627	611	212
	1.85	628	610	208
	1.851	626	608.5	202
	1.852	626	605	203
	1.853	625	610.5	198
	1.854	621.5	610.5	195
	1.855	620.5	607.5	192
	1.856	625.5	611	186
	1.857	621	613	183.5
	1.858	625.5	611	182.5
	1.859	621	612.5	181.5
	1.86	620	608	174
	1.861	619.5	611	175
	1.862	618.5	611	173
	1.863	617	610.5	169
	1.864	618	610.5	166
	1.865	615.5	613.5	165.5
	1.866	616.5	611	159.5
	1.867	616.5	614	156.5
	1.868	615	611	156.5
	1.869	613	610	150
	1.87	615.5	616	153.5
	1.871	614	614	149
	1.872	616	614	148.5
	1.873	611	611	147
	1.874	611	616	142.5
	1.875	613.5	615.5	141.5
	1.876	611	614	141.5
	1.877	611	611	138.5
	1.878	610	611	140
	1.879	614	611	134.5
	1.88	607.5	615.5	130.5
	1.881	606.5	611	132
	1.882	606	618	128.5
	1.883	608.5	611	126
	1.884	605.5	615	126.5
	1.885	603	614.5	124
	1.886	607	615.5	124
	1.887	603	611	122
	1.888	603.5	611	120.5
	1.889	601.5	613	119
	1.89	601	613	120
	1.891	601.5	611	116
	1.892	604	615.5	117
	1.893	601.5	615.5	119
	1.894	601.5	615	113.5
	1.895	601	611	116.5
	1.896	598.5	610	114.5
	1.897	603	612.5	115.5
	1.898	603.5	611	111.5
	1.899	600	612.5	110.5
	1.9	599	611	112
	1.901	598	614.5	113.5
	1.902	599	613	112.5
	1.903	595	613	112.5
	1.904	598.5	609	112.5
	1.905	598.5	611	112.5
	1.906	594	610.5	114
	1.907	594.5	610.5	109
	1.908	594.5	611	111
	1.909	596	613	113
	1.91	593	612.5	110.5
	1.911	592	613	112.5
	1.912	592	609	112
	1.913	592	609.5	114.5
	1.914	588	610.5	112
	1.915	589.5	610.5	118.5
	1.916	588	611	116
	1.917	586.5	609.5	117
	1.918	584	610	120.5
	1.919	581	610.5	119.5
	1.92	584	611	124
	1.921	583.5	608.5	124.5
	1.922	580	610	127
	1.923	580	610	128
	1.924	575	610.5	129.5
	1.925	575.5	609	130
	1.926	575.5	607.5	134
	1.927	574	604	137.5
	1.928	573	605.5	139.5
	1.929	572.5	607.5	140.5
	1.93	566.5	605	143
	1.931	566.5	608.5	149
	1.932	565.5	608.5	149.5
	1.933	566	608.5	152.5
	1.934	561.5	608.5	154
	1.935	560.5	604	158.5
	1.936	564	605.5	158
	1.937	559.5	607.5	160
	1.938	560.5	608.5	164
	1.939	559	605.5	166
	1.94	558.5	608.5	168.5
	1.941	554	606	171.5
	1.942	554	605	173
	1.943	556	603.5	176
	1.944	551.5	607	180
	1.945	549	607	180.5
	1.946	550.5	606.5	185
	1.947	549	607.5	189.5
	1.948	547	608.5	190.5
	1.949	543.5	605	196
	1.95	543	606.5	197.5
	1.951	539	608.5	202.5
	1.952	539.5	603.5	201.5
	1.953	535	607	209.5
	1.954	534.5	608.5	213
	1.955	535	608	216.5
	1.956	531.5	607.5	219
	1.957	527	607.5	224.5
	1.958	523	606.5	228.5
	1.959	526.5	607.5	232
	1.96	522	608.5	239.5
	1.961	519.5	607	241
	1.962	519.5	605	247.5
	1.963	519	610	253
	1.964	517.5	610	259.5
	1.965	513	609.5	264.5
	1.966	512	609	273.5
	1.967	506.5	610	280
	1.968	508.5	611	288
	1.969	507.5	611	294.5
	1.97	500	610	300
	1.971	499	607.5	311.5
	1.972	498	611	314
	1.973	498.5	614.5	321
	1.974	493.5	611	328.5
	1.975	490.5	614	338
	1.976	489	610	342.5
	1.977	484.5	614	353
	1.978	485.5	612.5	355.5
	1.979	479.5	611	362.5
	1.98	478.5	614	369
	1.981	471.5	615	375.5
	1.982	468	614.5	382.5
	1.983	465.5	611	390.5
	1.984	463.5	611	395.5
	1.985	456.5	616.5	399.5
	1.986	452.5	611	403
	1.987	451	613.5	407
	1.988	444.5	614	411.5
	1.989	447	616.5	416.5
	1.99	439	615.5	424
	1.991	435.5	615.5	429.5
	1.992	433.5	614	433.5
	1.993	429	614	436.5
[truncated: 13,006 more rows]

## Sheet: J
DataTypeVer2.0	Time	Fz	Fz	Fz
NumberOfData		15000	15000	15000
PreTriggerData		0	0	0
SamplingTime[ms]		1	1	1
DataLabel		W1:CMJ	W2:CMJ	W3:CMJ
DataUnit	sec	N	N	N
	0	725	724	726.5
	0.001	726.5	726.5	730
	0.002	726	725	727.5
	0.003	725.5	723.5	728.5
	0.004	727.5	726	730
	0.005	725	724	728.5
	0.006	726.5	721	730.5
	0.007	725.5	725	729
	0.008	727.5	732	727
	0.009	723	726	728.5
	0.01	728.5	726.5	731
	0.011	728.5	730	727.5
	0.012	727	728.5	729.5
	0.013	731.5	725.5	727.5
	0.014	728	728	726
	0.015	724	727.5	729.5
	0.016	728	729	729
	0.017	731.5	729	727
	0.018	729.5	728.5	728.5
	0.019	728.5	728	729
	0.02	726	733	728.5
	0.021	727	729	727.5
	0.022	730	731.5	723
	0.023	729.5	729.5	725
	0.024	728	730.5	728.5
	0.025	725	729.5	726
	0.026	728.5	731	726.5
	0.027	727	731.5	729
	0.028	727	728.5	725.5
	0.029	727.5	731	728
	0.03	727	733.5	729
	0.031	726.5	730.5	726
	0.032	730.5	734.5	725.5
	0.033	727	732	728.5
	0.034	728.5	732	725.5
	0.035	725.5	735	725.5
	0.036	728.5	732.5	729.5
	0.037	728.5	730.5	730.5
	0.038	728.5	734.5	727
	0.039	726	734.5	731
	0.04	731.5	736.5	729
	0.041	726.5	734	728.5
	0.042	726	731.5	731
	0.043	724	731.5	726
	0.044	729	731	730
	0.045	728	733	724
	0.046	728.5	729.5	727
	0.047	723.5	733	725.5
	0.048	727	733.5	726.5
	0.049	728.5	733	729
	0.05	727.5	733	725
	0.051	730	733	725
	0.052	726.5	733.5	725.5
	0.053	730	732	726.5
	0.054	728.5	737.5	725
	0.055	729.5	733.5	727.5
	0.056	728	733	725
	0.057	729.5	732.5	729
	0.058	727.5	732.5	726.5
	0.059	727.5	730.5	724
	0.06	728	732	726
	0.061	730	731	725.5
	0.062	728	734	728.5
	0.063	730.5	732	730
	0.064	726	731.5	729.5
	0.065	728	733.5	726
	0.066	730	728.5	725.5
	0.067	728	729	726.5
	0.068	728.5	731	724
	0.069	726.5	732.5	727.5
	0.07	727.5	734	727
	0.071	727.5	733.5	728.5
	0.072	725.5	733	728
	0.073	730.5	731.5	724
	0.074	728	731.5	729
	0.075	727.5	730.5	722
	0.076	726	728	729.5
	0.077	730.5	731	726.5
	0.078	726.5	733.5	725.5
	0.079	728.5	731	727.5
	0.08	729	732	729.5
	0.081	725	730.5	725
	0.082	725.5	727.5	727
	0.083	727.5	727.5	729
	0.084	727	731	725
	0.085	725.5	731	728.5
	0.086	728	728.5	724
	0.087	725	731	729.5
	0.088	727.5	728.5	727.5
	0.089	724	735	723
	0.09	727.5	727.5	726.5
	0.091	725	731	725.5
	0.092	723.5	725	726
[truncated: 14,907 more rows]
