# Supplementary material for: Effects of high-intensity sprint exercise on neuromuscular function in sprinters: the countermovement jump as a fatigue assessment tool
Source: PeerJ. 2024 May 29;12:e17443. doi: 10.7717/peerj.17443 (PMC11143976; doi:10.7717/peerj.17443)
Supplement: Supplemental Information 5 — The data for each trial for each participant (A–J). [file peerj-12-17443-s005.xlsx]

## Sheet: A
DataTypeVer2.0	Time	Fz	Fz	Fz
NumberOfData		8000	8000	8000
PreTriggerData		0	0	0
SamplingTime[ms]		1	1	1
DataLabel		K1:CMJ	K2:CMJ	K3:CMJ
DataUnit	sec	N	N	N
	0	555	558.5	560.5
	0.001	554.5	556	555.5
	0.002	553	559	558.5
	0.003	557	557	557
	0.004	556	558	558.5
	0.005	558.5	559	564
	0.006	555	557	564
	0.007	553.5	558.5	560.5
	0.008	557	557	560.5
	0.009	554	560	556.5
	0.01	554.5	557	560.5
	0.011	556.5	556.5	560.5
	0.012	560	554	561.5
	0.013	555	555.5	560.5
	0.014	557	557.5	561
	0.015	557.5	560.5	558.5
	0.016	555	556	560
	0.017	558.5	558.5	561
	0.018	554	558.5	560
	0.019	557	560.5	562
	0.02	557	559.5	560
	0.021	556.5	560.5	562
	0.022	557.5	557.5	561
	0.023	557	555	562
	0.024	557.5	557	560.5
	0.025	557	559.5	563
	0.026	555	561	561
	0.027	556.5	560.5	563.5
	0.028	557.5	558	560.5
	0.029	559.5	560.5	562.5
	0.03	558	560.5	557
	0.031	556.5	557	562.5
	0.032	558.5	556.5	563.5
	0.033	560.5	562.5	558.5
	0.034	555	557	560.5
	0.035	556.5	555.5	558.5
	0.036	555	560.5	563.5
	0.037	556.5	559	562
	0.038	556.5	562.5	558.5
	0.039	557	558.5	560.5
	0.04	560.5	560.5	562
	0.041	555	559.5	561
	0.042	556.5	558	561
	0.043	560.5	557	560.5
	0.044	556.5	559	561.5
	0.045	557.5	558	560
	0.046	557.5	557	560.5
	0.047	555	560	560
	0.048	557.5	560.5	558
	0.049	558	557.5	557.5
	0.05	555	562.5	556.5
	0.051	557.5	562.5	559
	0.052	558	560.5	559
	0.053	556	560.5	557
	0.054	558.5	561.5	562.5
	0.055	556	560.5	561.5
	0.056	556	560	558
	0.057	558.5	560	560.5
	0.058	555.5	559	560
	0.059	555.5	560.5	561.5
	0.06	558.5	558	561
	0.061	554.5	560.5	558
	0.062	554	555.5	558
	0.063	554	560	560.5
	0.064	554	560	561
	0.065	557.5	556.5	559.5
	0.066	554	561.5	560
	0.067	556	558.5	560
	0.068	559	558	559
	0.069	557.5	558	562
	0.07	555	558.5	560.5
	0.071	555.5	559.5	562.5
	0.072	556	560	557
	0.073	554.5	555.5	560
	0.074	553.5	560	559
	0.075	557.5	560	558
	0.076	556	556	559
	0.077	558.5	556	560.5
	0.078	558.5	557	555
	0.079	554	558	560.5
	0.08	557	558	558
	0.081	554.5	553.5	561
	0.082	557	558	560.5
	0.083	560	558	560
	0.084	554	557	562
	0.085	555	556	562.5
	0.086	554	557	563
	0.087	557.5	556.5	560.5
	0.088	553.5	557.5	557
	0.089	558	555.5	562.5
	0.09	557	554.5	555
	0.091	556.5	553.5	554.5
	0.092	559	554	558.5
	0.093	555	554.5	559.5
	0.094	557.5	554	557
	0.095	559	553.5	558
	0.096	554	553.5	558.5
	0.097	559	551	562
	0.098	557.5	551.5	560
	0.099	555	552	556.5
	0.1	560	551.5	560.5
	0.101	555	554.5	559
	0.102	556.5	553.5	560.5
	0.103	557	552	560.5
	0.104	555	557	558.5
	0.105	557	552.5	555
	0.106	558.5	552	559.5
	0.107	555	552.5	558.5
	0.108	556.5	550.5	559
	0.109	560.5	555	556.5
	0.11	556.5	557	557.5
	0.111	555	553.5	558.5
	0.112	558.5	552	560
	0.113	556.5	554	558
	0.114	558.5	555	562
	0.115	557.5	556	560.5
	0.116	556.5	555	562
	0.117	555	550.5	559.5
	0.118	557	555	557.5
	0.119	555	556	561
	0.12	556	557	560.5
	0.121	560	555	560
	0.122	559	552	558.5
	0.123	561	555	558
	0.124	556	554	557.5
	0.125	556	558	560
	0.126	559	556	558
	0.127	559	555	560.5
	0.128	556.5	558.5	560.5
	0.129	559.5	555	560.5
	0.13	557	555	560.5
	0.131	555	554	560.5
	0.132	559	555.5	561
	0.133	558	554	560.5
	0.134	558.5	556	557
	0.135	558	555	559
	0.136	555	559.5	558.5
	0.137	553	561	558.5
	0.138	558.5	557	559.5
	0.139	553.5	559	559.5
	0.14	556.5	558	561
	0.141	555	558	556.5
	0.142	557	560	557
	0.143	554.5	560	556
	0.144	554.5	560.5	556.5
	0.145	554	564.5	563.5
	0.146	555	561.5	558.5
	0.147	556.5	559	559
	0.148	554.5	560.5	559.5
	0.149	554.5	560.5	559.5
	0.15	555	562.5	554
	0.151	558	562	557
	0.152	557.5	561.5	558.5
	0.153	554	562.5	556
	0.154	554.5	560.5	557
	0.155	555.5	563.5	556.5
	0.156	558	563	555
	0.157	554	564.5	554
	0.158	553.5	564	552.5
	0.159	556.5	560.5	555
	0.16	554	562.5	558
	0.161	554	564.5	553.5
	0.162	554	564.5	556
	0.163	553	562.5	554
	0.164	554.5	560	554
	0.165	554.5	560.5	553.5
	0.166	554.5	562	558.5
	0.167	554	563.5	556.5
	0.168	554	566.5	553
	0.169	554.5	563.5	558.5
	0.17	553	561.5	558.5
	0.171	554	563	558
	0.172	556.5	562.5	557
	0.173	552	561	555
	0.174	554	561.5	558
	0.175	555	564	554
	0.176	554.5	562	555
	0.177	556.5	561.5	554.5
	0.178	556.5	562	556.5
	0.179	550.5	562	555
	0.18	554	564	557
	0.181	551.5	561	553.5
	0.182	553.5	564.5	556.5
	0.183	554	564	554.5
	0.184	555	564.5	555
	0.185	554.5	559.5	553.5
	0.186	555	560	556.5
	0.187	557	560.5	555
	0.188	555	562	557.5
	0.189	552.5	561.5	553.5
	0.19	555	562.5	554
	0.191	555	562	555
	0.192	554	558.5	556
	0.193	556	560.5	555
	0.194	555	560	557.5
	0.195	554	561.5	554
	0.196	554.5	563	555.5
	0.197	555	560.5	556.5
	0.198	554.5	556.5	558
	0.199	557	561	555
	0.2	559.5	559.5	560.5
	0.201	557	555	555.5
	0.202	555	564.5	559
	0.203	556.5	559	557
	0.204	559	561.5	559
	0.205	558.5	561	561
	0.206	556.5	557.5	557.5
	0.207	555.5	558.5	560
	0.208	556	560	559
	0.209	558	558.5	557.5
	0.21	555.5	560.5	558
	0.211	556.5	560.5	554
	0.212	555	557	556.5
	0.213	557	558.5	554
	0.214	554	558	559
	0.215	557.5	557	560
	0.216	557	560.5	560.5
	0.217	558.5	560.5	557
	0.218	555	558.5	558.5
	0.219	558	558.5	558.5
	0.22	557.5	556	561
	0.221	555.5	559	559.5
	0.222	560.5	563.5	559
	0.223	556.5	558	557
	0.224	555	559	556.5
	0.225	563	557.5	558.5
	0.226	558.5	560.5	560
	0.227	559	560.5	559.5
	0.228	559	556.5	559.5
	0.229	557.5	558.5	554
	0.23	556.5	556.5	558.5
	0.231	560	562.5	555
	0.232	554.5	560.5	554
	0.233	559.5	555	555
	0.234	558.5	557	557.5
	0.235	555	560	559.5
	0.236	553.5	556.5	557
	0.237	557	556	559.5
	0.238	556.5	556.5	559
	0.239	559	560.5	557
	0.24	557.5	556	557.5
	0.241	560.5	560.5	558.5
	0.242	555	555	556.5
	0.243	559.5	560.5	553.5
	0.244	556	556.5	558.5
	0.245	554	559.5	554
	0.246	557	556	558.5
	0.247	558	556.5	560.5
	0.248	557	556.5	557.5
	0.249	559.5	553.5	559.5
	0.25	557.5	557	560.5
	0.251	559	559	554.5
	0.252	557.5	558	560.5
	0.253	556.5	556	556
	0.254	556	558.5	555
	0.255	554.5	557.5	555
	0.256	556	559	554
	0.257	554	555	554.5
	0.258	554	558.5	556.5
	0.259	553	555	560.5
	0.26	554	556	558.5
	0.261	557	555	557
	0.262	552.5	555	558.5
	0.263	558.5	557.5	560.5
	0.264	557	556.5	559
	0.265	553.5	558.5	556
	0.266	556	557	559
	0.267	554.5	554.5	555
	0.268	554	555	557
	0.269	552.5	553	562
	0.27	551	557	556.5
	0.271	555	554	558
	0.272	553	555	559
	0.273	553.5	555	557.5
	0.274	553.5	556.5	561
	0.275	552.5	555	557
	0.276	553	556	559
	0.277	552.5	556	557.5
	0.278	553.5	556.5	560.5
	0.279	553	560	561.5
	0.28	554	556.5	556.5
	0.281	554	553.5	558
	0.282	551	556	560.5
	0.283	554	554.5	559.5
	0.284	556	553.5	558
	0.285	554.5	557.5	557.5
	0.286	554.5	553.5	561
	0.287	555	557	556.5
	0.288	555	554	558.5
	0.289	553	555	557
	0.29	555	557.5	560.5
	0.291	555	555	558
	0.292	553.5	551.5	561
	0.293	554	555	557
	0.294	554	556.5	560
	0.295	553	556	560.5
	0.296	552.5	555	559.5
	0.297	554.5	554	556.5
	0.298	553	555	558.5
	0.299	556	555	560
	0.3	554.5	554	559
	0.301	553	553	560.5
	0.302	556	556	559.5
	0.303	555	555	560.5
	0.304	554.5	555	559
	0.305	553.5	558	561
	0.306	554	559	557
	0.307	554.5	553	559.5
	0.308	552	558	556
	0.309	554	553.5	561.5
	0.31	554	550.5	556.5
	0.311	556.5	555	561
	0.312	555	557	556
	0.313	553	550	558.5
	0.314	554	556	560
	0.315	555	555	558.5
	0.316	554.5	554	557
	0.317	553.5	553	558
	0.318	555	554	559
	0.319	552.5	557.5	557
	0.32	556	556	557
	0.321	555	554	559
	0.322	553.5	556	560.5
	0.323	554.5	555.5	557.5
	0.324	553.5	556	560
	0.325	555.5	556.5	559.5
	0.326	552	559	560
	0.327	557	559.5	555
	0.328	554	553	560
	0.329	556	554.5	558.5
	0.33	557	558	557.5
	0.331	554.5	557	559.5
	0.332	554	562	557
	0.333	556.5	556	554
	0.334	554	558	559.5
	0.335	551.5	559	559
	0.336	557	559.5	559.5
	0.337	553.5	560.5	558
	0.338	556.5	559.5	556.5
	0.339	553.5	559.5	558.5
	0.34	554	561	559.5
	0.341	558	560	558
	0.342	554	559	558
	0.343	557	559.5	558.5
	0.344	553.5	558.5	559
	0.345	557.5	558	560
	0.346	554	558.5	558.5
	0.347	557	558	554.5
	0.348	559.5	561.5	559.5
	0.349	559.5	563.5	555
	0.35	556	560.5	558.5
	0.351	559	562.5	556
	0.352	559.5	560.5	556
	0.353	557.5	556.5	561
	0.354	557.5	562	559
	0.355	557	560	557
	0.356	559	560.5	554
	0.357	558	563	559
	0.358	560.5	561.5	559
	0.359	562	562.5	554.5
	0.36	559	562	558
	0.361	560.5	561.5	560
	0.362	561	563.5	559
	0.363	560.5	563.5	556
	0.364	557	560.5	559.5
	0.365	558.5	562	554
	0.366	558.5	560	559
	0.367	561	567	556.5
	0.368	559	560	558.5
	0.369	559	559.5	560
	0.37	560.5	560	558
	0.371	561.5	560	556
	0.372	561.5	560	558.5
	0.373	564.5	560	559
	0.374	559	561	558.5
	0.375	562	562.5	554.5
	0.376	561	561.5	560.5
	0.377	561.5	557.5	555.5
	0.378	561.5	560.5	558
	0.379	559	561	558.5
	0.38	560.5	557	560
	0.381	559	560.5	556
	0.382	560.5	560.5	558
	0.383	559.5	556	556.5
	0.384	560.5	560.5	556.5
	0.385	560.5	561	558.5
	0.386	561	560.5	560.5
	0.387	561.5	560.5	561
	0.388	561	560	557
	0.389	561	557.5	560.5
	0.39	560.5	556	559
	0.391	561.5	561.5	560.5
	0.392	560	557.5	556.5
	0.393	560.5	556.5	560
	0.394	558	554.5	558.5
	0.395	560.5	557.5	557.5
	0.396	557.5	560	559
	0.397	556.5	557.5	558.5
	0.398	558	559	557.5
	0.399	561.5	558	560
	0.4	561.5	557.5	561.5
	0.401	557.5	557.5	555
	0.402	556.5	557	556
	0.403	557.5	557	560
	0.404	556.5	555	559.5
	0.405	555	556.5	557
	0.406	557.5	560	558
	0.407	556	557.5	560
	0.408	555	555	558
	0.409	558.5	557.5	558.5
	0.41	556.5	556	560
	0.411	552	554.5	559
	0.412	556	557.5	554
	0.413	556.5	557.5	558
	0.414	558.5	554	562
	0.415	556.5	560	559
	0.416	553	559	560.5
	0.417	557	559.5	557
	0.418	557.5	560	559
	0.419	556.5	556.5	559
	0.42	556	559.5	557
	0.421	559	558	562
	0.422	555	559	561
	0.423	556.5	557.5	559.5
	0.424	555	556	559.5
	0.425	555	557	557
	0.426	555.5	558	558
	0.427	555	556.5	560
	0.428	554	557.5	560
	0.429	556	562.5	559.5
	0.43	556.5	559	559
	0.431	556.5	561	553.5
	0.432	554.5	557	558
	0.433	559	554	559
	0.434	554	557.5	556.5
	0.435	555	559	562
	0.436	553	558	560
	0.437	550	561	557
	0.438	553.5	557.5	561
	0.439	552.5	558.5	558.5
	0.44	555	556.5	557.5
	0.441	555	560.5	557
	0.442	553	558	554.5
	0.443	557.5	556.5	559
	0.444	551	555	557.5
	0.445	555	560.5	558.5
	0.446	552.5	556	559
	0.447	555	558.5	559
	0.448	552	555	557.5
	0.449	559	557	554.5
	0.45	554	556.5	556
	0.451	555	556.5	559
	0.452	554	559.5	556.5
	0.453	555	560	558
	0.454	550.5	554	557.5
	0.455	554	556.5	557
	0.456	553	557	561.5
	0.457	554	555	555
	0.458	557	560	558.5
	0.459	553	559.5	560
	0.46	555	557.5	554.5
	0.461	553.5	560	554
	0.462	557	557	559
	0.463	553.5	559.5	558
	0.464	555	558.5	556.5
	0.465	553	555	558
	0.466	552.5	556	560
	0.467	555	558.5	560
	0.468	552.5	555	555
	0.469	554.5	557.5	557.5
	0.47	555.5	556.5	558
	0.471	554.5	558	558
	0.472	555	559	557.5
	0.473	553	558.5	555
	0.474	551	555	561.5
	0.475	554	556.5	558
	0.476	554.5	557	560
	0.477	554.5	560.5	557.5
	0.478	553.5	554.5	560
	0.479	557	559	556
	0.48	554	553.5	558.5
	0.481	557.5	557	557.5
	0.482	555.5	554	557
	0.483	557.5	558	560.5
	0.484	556	560.5	561.5
	0.485	553.5	557.5	560.5
	0.486	555	558.5	561
	0.487	552	559	561.5
	0.488	554	558.5	561
	0.489	554.5	556.5	560.5
	0.49	551.5	558	555
	0.491	553.5	558.5	560.5
	0.492	554	557.5	558
	0.493	554.5	556.5	556
	0.494	559.5	557.5	560.5
	0.495	557.5	557.5	559.5
	0.496	556	557.5	560.5
	0.497	556.5	560.5	559.5
	0.498	553.5	560.5	558.5
	0.499	556.5	556.5	560.5
	0.5	555	559	559.5
	0.501	556	556.5	562
	0.502	554.5	557.5	559.5
	0.503	554	555	560.5
	0.504	556.5	555	559
	0.505	556	558	562
	0.506	556.5	560.5	561.5
	0.507	555	558	562
	0.508	558.5	555.5	556.5
	0.509	554.5	557	562.5
	0.51	559	554.5	559.5
	0.511	556	558.5	560.5
	0.512	558	558.5	559.5
	0.513	558	558.5	563
	0.514	554	558.5	561
	0.515	555	555	560.5
	0.516	556	558	562
	0.517	556	555	560.5
	0.518	554.5	555	563.5
	0.519	556	559	560
	0.52	557.5	558.5	558
	0.521	557	558.5	558.5
	0.522	555	558	560
	0.523	559.5	556.5	561.5
	0.524	559	556	559
	0.525	558	558.5	558
	0.526	555	559	562.5
	0.527	556	556.5	560.5
	0.528	553.5	558	558.5
	0.529	556.5	558	561
	0.53	557.5	556.5	563.5
	0.531	557	557	559.5
	0.532	554	554.5	561
	0.533	558	556.5	556
	0.534	558	560.5	559
	0.535	556	558.5	560.5
	0.536	557.5	557	561.5
	0.537	557	557	560.5
	0.538	557	562.5	557.5
	0.539	557	558.5	558
	0.54	556.5	556.5	558.5
	0.541	555	557	559
	0.542	554	562	558
	0.543	555	560.5	557
	0.544	557	559.5	561
	0.545	555	560.5	555
	0.546	557	556	560
	0.547	554.5	559	558
	0.548	557	555	558.5
	0.549	557	560.5	557
	0.55	554	558.5	560.5
	0.551	556	561	560.5
	0.552	559	562.5	554.5
	0.553	555	560.5	560.5
	0.554	557	560.5	558.5
	0.555	561	560.5	556
	0.556	559	557	559
	0.557	556.5	557.5	557
	0.558	559	555	556.5
	0.559	554	558.5	560.5
	0.56	555	560	559.5
	0.561	557	559	554.5
	0.562	555	557.5	555
	0.563	557	561	559
	0.564	556	559	559.5
	0.565	557.5	560.5	554.5
	0.566	556	558.5	555.5
	0.567	557.5	557	555
	0.568	556.5	555	557
	0.569	554.5	561	560.5
	0.57	556.5	558.5	555
	0.571	555	556	556
	0.572	557	556.5	554
	0.573	558.5	561	555
	0.574	554	559	557.5
	0.575	556.5	561	556.5
	0.576	556.5	559	558
	0.577	557	559.5	554
	0.578	559.5	557	558.5
	0.579	553.5	560.5	555
	0.58	558.5	558	556.5
	0.581	557	558.5	557
	0.582	554.5	559.5	554.5
	0.583	554	557	554.5
	0.584	557.5	559	555
	0.585	555	559	555
	0.586	559	559	557.5
	0.587	554.5	557	559
	0.588	552	556.5	554.5
	0.589	557	559	556
	0.59	556.5	554.5	556
	0.591	555	556.5	556.5
	0.592	556.5	556	555
	0.593	555	558.5	556.5
	0.594	555	555	556.5
	0.595	555	554.5	555
	0.596	555.5	557.5	558
	0.597	559.5	555	556
	0.598	555	555	555
	0.599	558	555	556
	0.6	556.5	557	558
	0.601	555	558.5	554.5
	0.602	555	557	552
	0.603	555	556.5	554
	0.604	554.5	556.5	557
	0.605	556	554	560
	0.606	553.5	555	556
	0.607	555	556	559
	0.608	559	557.5	560
	0.609	555.5	556	557.5
	0.61	554	557.5	557
	0.611	558.5	555	555
	0.612	555	554.5	556.5
	0.613	554.5	558.5	557
	0.614	555	556.5	555
	0.615	555	555	557
	0.616	555.5	559	558
	0.617	555	557.5	556.5
	0.618	554	557.5	554.5
	0.619	554.5	554	555
	0.62	558	555	558.5
	0.621	554	552	558
	0.622	554.5	556.5	553.5
	0.623	556.5	556.5	558.5
	0.624	559	554	555
	0.625	554	558.5	553
	0.626	555	557	554
	0.627	554	556.5	559
	0.628	555	558.5	557
	0.629	553.5	562.5	560
	0.63	557.5	557.5	558
	0.631	553.5	556.5	557
	0.632	557	555	555
	0.633	556.5	557.5	560
	0.634	554.5	556.5	558
	0.635	557	559	554
	0.636	558.5	558.5	559
	0.637	554	556.5	557
	0.638	554	560.5	555
	0.639	556.5	560	557.5
	0.64	558.5	559	554
	0.641	560	559	557
	0.642	556.5	554	557
	0.643	556	559	555
	0.644	554	562.5	556
	0.645	556	558	553
	0.646	560	560.5	556
	0.647	557.5	560.5	555
	0.648	557.5	556	558.5
	0.649	554	560	556.5
	0.65	558	558	554.5
	0.651	556	559	556
	0.652	553	560	554.5
	0.653	555	557.5	557.5
	0.654	553.5	558	554.5
	0.655	555	561	554
	0.656	554	556	559
	0.657	555	559	557
	0.658	554	562	557
	0.659	554.5	558.5	554
	0.66	556.5	558.5	555
	0.661	555	562	556.5
	0.662	555	560	553
	0.663	551	559.5	558.5
	0.664	552.5	558	555
	0.665	555	560	559.5
	0.666	556.5	561.5	560
	0.667	558	560	561.5
	0.668	554.5	558.5	559
	0.669	557	560	560
	0.67	555	555	561
	0.671	555	561	560.5
	0.672	554	560	559.5
	0.673	556.5	562	554.5
	0.674	555	559	558.5
	0.675	553.5	557	557
	0.676	555	555	557
	0.677	555	561.5	560
	0.678	560	554.5	557.5
	0.679	557	562	559.5
	0.68	559	560	560
	0.681	556	558	558.5
	0.682	554	558	561.5
	0.683	554.5	555.5	557.5
	0.684	557.5	560	560.5
	0.685	555	559	555
	0.686	554	558.5	560
	0.687	554.5	557.5	558.5
	0.688	557.5	558.5	556
	0.689	555	555	556.5
	0.69	558	554.5	559.5
	0.691	555	557	557.5
	0.692	557	556	559
	0.693	556	556.5	560.5
	0.694	556.5	559.5	556
	0.695	560.5	560	559
	0.696	555	558	558.5
	0.697	554	556.5	560.5
	0.698	557	556	559.5
	0.699	558.5	560.5	557
	0.7	556.5	563	555
	0.701	554	559	559
	0.702	558.5	558.5	558
	0.703	559	555	560
	0.704	560.5	556	559
	0.705	558	560	559
	0.706	556.5	559.5	557
	0.707	557	557	560.5
	0.708	557	557.5	557.5
	0.709	554.5	553.5	558.5
	0.71	557	557.5	557
	0.711	555	558.5	557
	0.712	561	556.5	560.5
	0.713	556	554	560
	0.714	558	559	557.5
	0.715	563.5	558.5	556.5
	0.716	555	556.5	559
	0.717	556	558.5	561
	0.718	559	556	560
	0.719	558	557.5	560
	0.72	557.5	559	560.5
	0.721	560	555.5	558
	0.722	556.5	559.5	557.5
	0.723	559	558.5	556.5
	0.724	560	556.5	556.5
	0.725	558.5	559	558.5
	0.726	561.5	557.5	557.5
	0.727	558	557	558
	0.728	559.5	560.5	554.5
	0.729	559	560	556.5
	0.73	560	558	559.5
	0.731	559.5	556	559
	0.732	561.5	557.5	556
	0.733	560.5	556	556.5
	0.734	560	557.5	556
	0.735	557	557	557
	0.736	557.5	559	556
	0.737	557	557.5	555.5
	0.738	556	559	555
	0.739	558	556	557.5
	0.74	555	559.5	554
	0.741	558.5	557.5	557.5
	0.742	555	557.5	557.5
	0.743	554.5	554.5	557
	0.744	558.5	556	555
	0.745	559	559	557
	0.746	555.5	559	558.5
	0.747	560.5	557.5	555
	0.748	560.5	560	559
	0.749	559.5	557	556.5
	0.75	554	559	557.5
	0.751	560.5	557.5	560
	0.752	558.5	560.5	556
	0.753	560.5	558.5	557
	0.754	557	555.5	556.5
	0.755	559.5	557.5	557
	0.756	557.5	560	557.5
	0.757	555	559	556
	0.758	560.5	556.5	558
	0.759	560	557	556.5
	0.76	558.5	558.5	558
	0.761	557	560.5	558.5
	0.762	556	560.5	558.5
	0.763	558	558	556
	0.764	557	555	555
	0.765	556	554.5	557
	0.766	559	558.5	557.5
	0.767	556.5	560	559.5
	0.768	555	557.5	561
	0.769	557.5	556	558.5
	0.77	556	560.5	560.5
	0.771	559	556.5	555
	0.772	557.5	559	561
	0.773	560.5	560.5	557.5
	0.774	555	556.5	558
	0.775	557	557	558.5
	0.776	559	556.5	560.5
	0.777	557.5	557	558
	0.778	557	554	560
	0.779	554.5	559	557.5
	0.78	553.5	558	559.5
	0.781	560.5	560	561
	0.782	555	559.5	559.5
	0.783	557.5	557	559
	0.784	558	558.5	558
	0.785	557.5	562.5	559
	0.786	558.5	559	559
	0.787	556	558	560.5
	0.788	557	557	558.5
	0.789	559.5	557	560.5
	0.79	556.5	559.5	560.5
	0.791	554.5	556.5	557
	0.792	554	557	561.5
	0.793	556.5	559	562.5
	0.794	556	555	562.5
	0.795	556.5	558	560.5
	0.796	554	558	559
	0.797	558	557	561.5
	0.798	556	559	560.5
	0.799	554	560.5	560.5
	0.8	555	555.5	558.5
	0.801	558.5	558	558
	0.802	557.5	557.5	559
	0.803	557.5	556.5	559.5
	0.804	556.5	560.5	559
	0.805	558	560	558.5
	0.806	557.5	558	560.5
	0.807	554.5	556.5	558.5
	0.808	555	559	560.5
	0.809	558.5	560	560
	0.81	557.5	556.5	559.5
	0.811	556	555	557.5
	0.812	556	559.5	558.5
	0.813	557.5	557	560.5
	0.814	555	558.5	557
	0.815	559.5	555.5	558.5
	0.816	557	558.5	556.5
	0.817	557	559	557.5
	0.818	557	556.5	554.5
	0.819	556	554	558
	0.82	557.5	558.5	559.5
	0.821	556.5	560.5	557
	0.822	559.5	558	560.5
	0.823	554	558.5	556.5
	0.824	558	556	559.5
	0.825	555.5	560.5	557.5
	0.826	558.5	556.5	559
	0.827	560	557	558
	0.828	556.5	558.5	557
	0.829	556.5	558	558.5
	0.83	554.5	557.5	560
	0.831	554	556.5	558
	0.832	556.5	556.5	554
	0.833	557	554	558.5
	0.834	560	555.5	555.5
	0.835	557	561	559.5
	0.836	555	554.5	556.5
	0.837	556	560.5	556
	0.838	557.5	556.5	555
	0.839	555	558	557.5
	0.84	556	559.5	557.5
	0.841	558.5	557	557
	0.842	558.5	557.5	554
	0.843	556.5	560.5	556.5
	0.844	557	554.5	559
	0.845	554.5	559	557
	0.846	557.5	555	554
	0.847	560.5	557.5	556.5
	0.848	555.5	556.5	554
	0.849	560	555	557
	0.85	557.5	557	558.5
	0.851	556	557.5	554
	0.852	557	556	557
	0.853	555	562	555
	0.854	557	559.5	560
	0.855	555	560.5	554
	0.856	560.5	557.5	555
	0.857	555	557.5	554
	0.858	556	560.5	554
	0.859	558.5	560	555
	0.86	557.5	559	555
	0.861	556.5	559.5	556.5
	0.862	556	560	559
	0.863	555	557	558.5
	0.864	556.5	560.5	555
	0.865	554.5	560.5	556.5
	0.866	557	562	556.5
	0.867	554.5	560	556
	0.868	557.5	558.5	558.5
	0.869	554.5	557	556.5
	0.87	557.5	555	557.5
	0.871	555	561	556
	0.872	555	557.5	556.5
	0.873	560	557.5	558.5
	0.874	557.5	562	558.5
	0.875	557	558	554.5
	0.876	557	561.5	558
	0.877	553.5	557.5	557
	0.878	555	558	555
	0.879	558	560.5	559.5
	0.88	556.5	560.5	557
	0.881	554.5	559	556.5
	0.882	557	555	558
	0.883	556.5	560.5	560.5
	0.884	556.5	559.5	557.5
	0.885	553.5	558	555
	0.886	554	561	555
	0.887	555	557.5	559.5
	0.888	556	560.5	557.5
	0.889	558.5	559	558
	0.89	553.5	559	556.5
	0.891	552	560.5	559.5
	0.892	557.5	557	560
	0.893	558	559	555.5
	0.894	556.5	559	556
	0.895	556.5	556	556.5
	0.896	555	559	556
	0.897	554.5	558	557.5
	0.898	554.5	557	555
	0.899	554	557	557.5
	0.9	555	559	558.5
	0.901	554	559	559.5
	0.902	556	560	558
	0.903	555	559	557
	0.904	559.5	558.5	555
	0.905	554	559	558
	0.906	555	558.5	556.5
	0.907	556	559.5	559.5
	0.908	555	560	555
	0.909	557	558.5	557
	0.91	555	556.5	556
	0.911	552	562	557.5
	0.912	556	560.5	556.5
	0.913	557	557	554
	0.914	552.5	561.5	555
	0.915	554	560.5	556.5
	0.916	554.5	557.5	559
	0.917	557	557	556.5
	0.918	560	562.5	557.5
	0.919	558	557.5	557.5
	0.92	553.5	559	555.5
	0.921	554	560.5	554
	0.922	557	563.5	560.5
	0.923	559.5	558.5	556
	0.924	556	560	554
	0.925	557	561.5	557.5
	0.926	557.5	555	558
	0.927	555	559.5	557
	0.928	556.5	562	556.5
	0.929	554.5	560.5	558
	0.93	557	562.5	557.5
	0.931	559	558	558
	0.932	560	559	560
	0.933	559	561	554
	0.934	556	558.5	556
	0.935	554.5	559	558
	0.936	559.5	559	559
	0.937	557.5	556.5	554.5
	0.938	557.5	556	556
	0.939	558.5	558.5	559
	0.94	555.5	559	557.5
	0.941	559	558	560.5
	0.942	557	562.5	557.5
	0.943	559.5	559	557.5
	0.944	556.5	558	557.5
	0.945	557	557	558
	0.946	559.5	560	554.5
	0.947	554.5	561.5	560
	0.948	559.5	559	560
	0.949	560.5	556.5	557.5
	0.95	561	558.5	558.5
	0.951	558.5	559.5	558.5
	0.952	554	556.5	561
	0.953	558	559	556
	0.954	556.5	557	557.5
	0.955	556.5	560	560
	0.956	557	560.5	560.5
	0.957	557.5	565	556.5
	0.958	559.5	560.5	561.5
	0.959	556	559.5	560.5
	0.96	554.5	560	558.5
	0.961	555	560.5	561
	0.962	556.5	561	557.5
	0.963	560	561.5	558.5
	0.964	559	559.5	560
	0.965	558	560.5	560.5
	0.966	556.5	559	561
	0.967	557	557	562
	0.968	556.5	560.5	558.5
	0.969	555	560.5	559.5
	0.97	556.5	560.5	561
	0.971	556	560.5	563.5
	0.972	556	556.5	563
	0.973	554.5	561.5	560.5
	0.974	555	561.5	562.5
	0.975	556.5	560.5	564
	0.976	553	558.5	560
	0.977	558	557	559
	0.978	555	558	559
	0.979	554	560.5	556.5
	0.98	554	559.5	561
	0.981	552	559.5	558
	0.982	555	557.5	560.5
	0.983	554	560	560.5
	0.984	555	560	561.5
	0.985	556	557	554
	0.986	554	560	556.5
	0.987	554	559.5	555.5
	0.988	554.5	558.5	559.5
	0.989	553.5	557	558
	0.99	555	562.5	558.5
	0.991	557	557	564
	0.992	555.5	559	560.5
	0.993	555.5	558.5	560
	0.994	554	557.5	558.5
	0.995	552	556.5	558
	0.996	554	554	558
	0.997	555	556.5	556.5
	0.998	554	559.5	557
	0.999	554.5	559.5	554.5
	1	552.5	557	560.5
	1.001	554	558.5	558.5
	1.002	557.5	555.5	560.5
	1.003	553.5	555	556
	1.004	552	555	558.5
	1.005	554	556	558.5
	1.006	551.5	557	559.5
	1.007	554.5	554	554.5
	1.008	557	557.5	558
	1.009	552	557	558
	1.01	554.5	557.5	558.5
	1.011	554	557.5	559.5
	1.012	555	556.5	558
	1.013	556.5	556	559
	1.014	554	554	560.5
	1.015	555	557.5	555.5
	1.016	554	555	558
	1.017	555	552	555
	1.018	553	553	556
	1.019	555	554.5	558
	1.02	555	550	556.5
	1.021	554.5	553.5	558
	1.022	554.5	554.5	555
	1.023	554.5	552.5	557
	1.024	554.5	554	558
	1.025	553	553.5	559
	1.026	555	555	557.5
	1.027	554	553.5	560.5
	1.028	552	553.5	559.5
	1.029	553	554	559.5
	1.03	556	556.5	554.5
	1.031	554.5	553.5	559.5
	1.032	555	556.5	556
	1.033	552.5	555.5	556.5
	1.034	553	554	559
	1.035	554.5	552.5	554.5
	1.036	555	554	561
	1.037	554.5	552.5	557.5
	1.038	554.5	550.5	557
	1.039	554.5	557	560
	1.04	553	556	554
	1.041	552.5	549.5	557.5
	1.042	553.5	552.5	558
	1.043	554	554.5	558.5
	1.044	554.5	554	556.5
	1.045	555	553	560.5
	1.046	552	557	556.5
	1.047	557	554	555.5
	1.048	554.5	553	559
	1.049	557	553.5	558
	1.05	553.5	551	560.5
	1.051	554	558.5	558
	1.052	556	552.5	558
	1.053	556.5	556	557
	1.054	553	556	557.5
	1.055	553	554.5	558
	1.056	556.5	552.5	558
	1.057	555	555	557.5
	1.058	557	553	558
	1.059	555.5	553.5	558.5
	1.06	554.5	552	560.5
	1.061	553	557.5	557
	1.062	552.5	557	560.5
	1.063	556	555.5	558.5
	1.064	554	556	557
	1.065	556	556.5	558
	1.066	554	555	557
	1.067	553.5	558	558
	1.068	552	557.5	561.5
	1.069	557.5	559	558
	1.07	556	559	559
	1.071	556.5	557	561.5
	1.072	556	559.5	557.5
	1.073	556.5	558	555
	1.074	557	556.5	559.5
	1.075	555	560.5	559
	1.076	559	558	559.5
	1.077	557.5	559	558.5
	1.078	558	558	560.5
	1.079	557.5	560	557
	1.08	554.5	560.5	561.5
	1.081	555	558.5	559
	1.082	558	556.5	558.5
	1.083	557.5	560.5	560.5
	1.084	554	557	558.5
	1.085	556	560.5	556.5
	1.086	557	558	561
	1.087	557.5	555	559
	1.088	560.5	563	557
	1.089	558.5	558.5	559
	1.09	556	559.5	558
	1.091	557	564	556
	1.092	557	562	557
	1.093	555	562.5	558
	1.094	554.5	560	556.5
	1.095	555.5	560	557.5
	1.096	554	561	558.5
	1.097	556.5	562	559.5
	1.098	560.5	562	559
	1.099	556.5	559.5	558.5
	1.1	560.5	560	558.5
	1.101	558.5	562	555.5
	1.102	556.5	559	557
	1.103	557	560	560
	1.104	557	562	558
	1.105	557.5	559	558.5
	1.106	560.5	560	554
	1.107	558.5	560.5	554.5
	1.108	558.5	560.5	558
	1.109	558	559	558.5
	1.11	560	561	559
	1.111	560.5	558.5	555
	1.112	560.5	559.5	556
	1.113	555.5	561.5	556
	1.114	557	562	557
	1.115	558	559.5	558.5
	1.116	560	561	556.5
	1.117	557.5	560.5	555
	1.118	560.5	563.5	556
	1.119	562	562	558
	1.12	560.5	559	560.5
	1.121	560.5	564	556.5
	1.122	562.5	560	559
	1.123	557.5	560.5	559
	1.124	557	555	556.5
	1.125	560.5	561.5	557.5
	1.126	560	557	559
	1.127	558.5	560	558
	1.128	560.5	555	559.5
	1.129	557.5	557.5	555
	1.13	560.5	559	556.5
	1.131	559	558	555
	1.132	559	559	556.5
	1.133	555	556	558
	1.134	560.5	560	560.5
	1.135	556.5	557	559.5
	1.136	560	559	558.5
	1.137	560.5	561.5	558
	1.138	554	557	560.5
	1.139	557	559	560
	1.14	558	558	559
	1.141	559	556.5	558
	1.142	555.5	554.5	559.5
	1.143	558.5	559	557.5
	1.144	558	557.5	560.5
	1.145	560	557	555
	1.146	559	555	559
	1.147	557.5	557	560
	1.148	560.5	558	560.5
	1.149	560.5	558	560
	1.15	559	556	557
	1.151	557.5	559	559.5
	1.152	558.5	554	556.5
	1.153	558	558.5	561
	1.154	559	554	559.5
	1.155	557.5	557	559
	1.156	560	557	560.5
	1.157	557	555	560.5
	1.158	555	554	556.5
	1.159	556.5	554.5	564
	1.16	555.5	554	560
	1.161	556.5	559	560.5
	1.162	560	554	560.5
	1.163	557	558	562
	1.164	557.5	557.5	557.5
	1.165	556	557.5	561
	1.166	557.5	555	560
	1.167	555	560.5	559
	1.168	555	558	558.5
	1.169	555	554.5	561.5
	1.17	556.5	557.5	559.5
	1.171	556	554	559
	1.172	557.5	554.5	560.5
	1.173	556.5	557	560.5
	1.174	556	557	559
	1.175	558	556.5	561.5
	1.176	560	558.5	558
	1.177	556.5	558.5	560.5
	1.178	557	556.5	560
	1.179	559.5	556.5	558.5
	1.18	561.5	556	560
	1.181	556.5	557.5	560.5
	1.182	558	554	556.5
	1.183	557	556.5	561.5
	1.184	559	557.5	558
	1.185	558	558	561.5
	1.186	558.5	554.5	560.5
	1.187	557	557.5	560.5
	1.188	557	558	560
	1.189	555	557.5	557.5
	1.19	553	558	558
	1.191	557.5	559	557
	1.192	559	556.5	560.5
	1.193	554.5	562.5	560.5
	1.194	554	559.5	560.5
	1.195	555	557.5	558.5
	1.196	554	555	559
	1.197	556	559.5	559.5
	1.198	553.5	557.5	557.5
	1.199	557.5	560.5	559
	1.2	555	556	560
	1.201	557.5	556.5	558
	1.202	557	556	556.5
	1.203	559	560.5	559
	1.204	558.5	556	554
	1.205	554	560	553.5
	1.206	554.5	555	554
	1.207	555	557	558
	1.208	560.5	560	559.5
	1.209	555	555	556.5
	1.21	555	559	556
	1.211	553.5	560.5	555
	1.212	557.5	557.5	555.5
	1.213	559	556.5	558
	1.214	555	557	557.5
	1.215	558	558	557.5
	1.216	557	556	559
	1.217	560.5	557.5	558
	1.218	559	557	557.5
	1.219	560	560	552.5
	1.22	560.5	557.5	555
	1.221	557	560.5	557
	1.222	560	558.5	558
	1.223	560	558.5	556.5
	1.224	561.5	559.5	557.5
	1.225	557.5	557.5	557.5
	1.226	558	557.5	558
	1.227	558.5	557	554
	1.228	559	560	559.5
	1.229	554.5	559.5	560.5
	1.23	558	555.5	560.5
	1.231	562.5	559.5	557
	1.232	554	559.5	559.5
	1.233	558.5	560.5	555.5
	1.234	560.5	559.5	558.5
	1.235	557.5	560.5	559
	1.236	561.5	560	560
	1.237	558.5	558.5	557
	1.238	560.5	558	558
	1.239	555	560.5	559
	1.24	560.5	560.5	559.5
	1.241	559.5	558	553.5
	1.242	560	557.5	560
	1.243	554.5	558.5	558.5
	1.244	558.5	560	557.5
	1.245	559	559	560
	1.246	558.5	557.5	560.5
	1.247	564.5	554	560
	1.248	555	556.5	559
	1.249	557.5	557	560
	1.25	554	562	560.5
	1.251	556	561	557
	1.252	557.5	556	556.5
	1.253	556	557	558.5
	1.254	557.5	558	558.5
	1.255	557	560	557.5
	1.256	556.5	560	559
	1.257	558.5	558.5	555
	1.258	559.5	560	556.5
	1.259	555	560.5	558.5
	1.26	553.5	560.5	559
	1.261	557	556	555.5
	1.262	555	562	559
	1.263	557	560.5	556
	1.264	557	557.5	559.5
	1.265	558.5	559	561
	1.266	554.5	560.5	560.5
	1.267	558	559	557.5
	1.268	554.5	562	556
	1.269	554	560.5	560.5
	1.27	554.5	557.5	560.5
	1.271	554.5	557.5	559
	1.272	555	559.5	559.5
	1.273	554	559	557
	1.274	554.5	560	556
	1.275	553	560.5	558.5
	1.276	556	557.5	560
	1.277	554	557.5	559
	1.278	557.5	557	555
	1.279	554	556.5	557
	1.28	554.5	562.5	560.5
	1.281	554	556	560.5
	1.282	558	559	559
	1.283	557	555	560.5
	1.284	555	560.5	559
	1.285	554.5	559	559.5
	1.286	555	557.5	558.5
	1.287	554.5	557	558.5
	1.288	555	560.5	558
	1.289	556.5	557.5	555.5
	1.29	558	557	557.5
	1.291	554	561.5	561.5
	1.292	554	561.5	557.5
	1.293	557.5	559	557.5
	1.294	551.5	557	560.5
	1.295	558.5	554.5	558
	1.296	557	558	558.5
	1.297	560.5	561	560.5
	1.298	557	556	557.5
	1.299	558.5	559	558.5
	1.3	558.5	558	558
	1.301	555	559	557.5
	1.302	555	557	559.5
	1.303	557	561	560
	1.304	557	560.5	558.5
	1.305	557.5	558.5	560.5
	1.306	557.5	558.5	557.5
	1.307	558.5	558.5	556.5
	1.308	560.5	557.5	555
	1.309	556.5	557.5	558
	1.31	558	557.5	561
	1.311	556	560	558.5
	1.312	558	560.5	559
	1.313	556	558	560
	1.314	557	559	560
	1.315	557.5	556.5	556
	1.316	560.5	557	560.5
	1.317	558.5	559.5	555
	1.318	555.5	560	557
	1.319	557.5	557	560.5
	1.32	557.5	560	556
	1.321	559	555	556
	1.322	560	562	556.5
	1.323	560.5	560	559
	1.324	560	560.5	560
	1.325	561.5	555	558.5
	1.326	558	559.5	561
	1.327	559	557.5	557.5
	1.328	558.5	559	556
	1.329	559	556	557
	1.33	557.5	558	558.5
	1.331	559	559	558
	1.332	557	558.5	556.5
	1.333	556.5	560.5	559
	1.334	559	560.5	556.5
	1.335	558	556.5	558
	1.336	558.5	557	560.5
	1.337	559	558.5	560.5
	1.338	555	557	555
	1.339	558.5	556.5	556.5
	1.34	559	560	554
	1.341	556.5	556	558
	1.342	559	557	557.5
	1.343	555.5	555.5	558.5
	1.344	557	558	554.5
	1.345	556.5	559	560
	1.346	555	557.5	560.5
	1.347	557.5	554	558
	1.348	560.5	560.5	556.5
	1.349	557	555	556
	1.35	555.5	557.5	557.5
	1.351	558	560.5	554.5
	1.352	558.5	557.5	559.5
	1.353	556	559	560
	1.354	557.5	555.5	557.5
	1.355	557	558.5	557
	1.356	554	554.5	555
	1.357	554	555	559.5
	1.358	553.5	558	560
	1.359	554	554.5	560.5
	1.36	559	556	559.5
	1.361	555.5	555	559
	1.362	560.5	556	555
	1.363	557	555.5	557.5
	1.364	557.5	559	556.5
	1.365	558	558.5	556
	1.366	559.5	554.5	559
	1.367	555	557.5	556
	1.368	555	558	559.5
	1.369	556	558	558.5
	1.37	554	556	557
	1.371	554.5	560	554
	1.372	557	559	560
	1.373	556.5	557	556.5
	1.374	557.5	559	556.5
	1.375	557	556	556.5
	1.376	558.5	554	559
	1.377	558	555	559
	1.378	557.5	558.5	558.5
	1.379	558	551.5	560.5
	1.38	558.5	555	560.5
	1.381	559	557.5	560.5
	1.382	557	558.5	557.5
	1.383	559	557.5	559
	1.384	559.5	559	557
	1.385	557	554.5	560
	1.386	559	557	558.5
	1.387	555	559.5	559
	1.388	554	558.5	558.5
	1.389	553.5	557	560
	1.39	554.5	561	562
	1.391	556	557	559
	1.392	556.5	556	562
	1.393	555	559	559
	1.394	555	559.5	559.5
	1.395	556.5	559.5	564.5
	1.396	556	558.5	557.5
	1.397	556	556.5	560
	1.398	556.5	555	560.5
	1.399	557	558	561
	1.4	559.5	556	559
	1.401	554.5	556	560.5
	1.402	556.5	556.5	561.5
	1.403	549	556.5	559
	1.404	555	560.5	555
	1.405	558	558	559.5
	1.406	555	555.5	557
	1.407	552.5	557	563
	1.408	555.5	559.5	558.5
	1.409	555	561.5	560.5
	1.41	558	557	560.5
	1.411	556	557.5	560.5
	1.412	555	560.5	559.5
	1.413	552.5	554.5	558.5
	1.414	554.5	558.5	558.5
	1.415	554.5	559.5	560.5
	1.416	555	555	559.5
	1.417	552.5	559.5	558.5
	1.418	558	557.5	557
	1.419	554.5	556.5	559
	1.42	552.5	557.5	559.5
	1.421	555	559	560.5
	1.422	550	556	557
	1.423	552.5	557	558
	1.424	557.5	556	560
	1.425	557	558.5	559.5
	1.426	553	558	561
	1.427	554	560.5	557
	1.428	554	558	559
	1.429	549.5	558	560.5
	1.43	554	558	560.5
	1.431	554	555.5	560
	1.432	555	558.5	559.5
	1.433	554	557.5	556.5
	1.434	551.5	557	557.5
	1.435	554	557	559.5
	1.436	553.5	558	557.5
	1.437	553	556.5	560.5
	1.438	554.5	559.5	560
	1.439	554	560.5	560.5
	1.44	555	557	561
	1.441	559	558	560
	1.442	556.5	560.5	560.5
	1.443	553	558.5	560
	1.444	554	559	558.5
	1.445	554	560.5	558
	1.446	548.5	558.5	561
	1.447	550.5	559	561
	1.448	553.5	558	557
	1.449	551.5	560.5	564
	1.45	554	562.5	559.5
	1.451	551.5	556	558
	1.452	552	558.5	557.5
	1.453	552.5	556	558
	1.454	555	560	557
	1.455	554.5	559	560.5
	1.456	552	560	560.5
	1.457	553	556.5	557
	1.458	554	561.5	558
	1.459	554	560.5	560
	1.46	554	556	560
	1.461	550.5	556.5	558
	1.462	556	557.5	559.5
	1.463	556	557	560
	1.464	554	559	560.5
	1.465	551.5	558.5	560.5
	1.466	556.5	559	560.5
	1.467	554	557.5	560.5
	1.468	554	558.5	560
	1.469	554	560	561.5
	1.47	554	556.5	559.5
	1.471	550	560	557.5
	1.472	552.5	560.5	561.5
	1.473	556	559	563.5
	1.474	552.5	562	560.5
	1.475	555	556	561
	1.476	551	558.5	564.5
	1.477	555	562	564
	1.478	555	560	559.5
	1.479	555	560	561.5
	1.48	553.5	561	559.5
	1.481	554.5	557.5	562
	1.482	554.5	557.5	565
	1.483	556.5	560.5	562.5
	1.484	552.5	557	563
	1.485	554.5	560	561.5
	1.486	552	556	561
	1.487	554.5	560	563.5
	1.488	554	555	566.5
	1.489	556	556	560.5
	1.49	554	557	563.5
	1.491	550	560	561.5
	1.492	553.5	558.5	564
	1.493	553.5	561	562.5
	1.494	553.5	557.5	562
	1.495	554	557.5	563.5
	1.496	554	558.5	561.5
	1.497	554	557.5	561.5
	1.498	556	557	559.5
	1.499	557	557.5	560.5
	1.5	552	557.5	564
	1.501	556.5	560	560.5
	1.502	556	557.5	562
	1.503	558.5	554	562
	1.504	556	560.5	562.5
	1.505	553	559	561.5
	1.506	555	555	560.5
	1.507	558.5	559.5	561
	1.508	556.5	558.5	564.5
	1.509	551	556	564.5
	1.51	557.5	556.5	561.5
	1.511	555	554	563
	1.512	554.5	560.5	561
	1.513	557.5	556	564.5
	1.514	554.5	553.5	561.5
	1.515	555	555	561
	1.516	557.5	554.5	560
	1.517	558	559.5	565
	1.518	559	557	560
	1.519	557	554.5	560.5
	1.52	557	554.5	565
	1.521	554.5	555	561.5
	1.522	559	552	560.5
	1.523	557.5	558.5	560.5
	1.524	556	554.5	560.5
	1.525	558.5	558	558
	1.526	554	562.5	560.5
	1.527	556.5	560	561
	1.528	557	559	561.5
	1.529	556.5	559	560
	1.53	554	554.5	557.5
	1.531	558.5	557	560.5
	1.532	557.5	560	560.5
	1.533	558	558	560
	1.534	556	558	556.5
	1.535	555	558.5	561
	1.536	558	559	557
	1.537	555	556	560
	1.538	556.5	558	561
	1.539	558.5	558	557
	1.54	555	557	559
	1.541	555	559.5	555
	1.542	556.5	558	557.5
	1.543	556.5	556.5	560.5
	1.544	557	557	554
	1.545	560	559.5	560.5
	1.546	554.5	562.5	559
	1.547	557	559.5	557.5
	1.548	555	555	554.5
	1.549	555.5	559.5	555.5
	1.55	554	560.5	556.5
	1.551	557.5	561	554
	1.552	556.5	558	556.5
	1.553	557	559.5	560
	1.554	554.5	561.5	555
	1.555	554	557.5	558
	1.556	553.5	561.5	556
	1.557	557	556	558
	1.558	557	564.5	558
	1.559	553.5	559.5	557.5
	1.56	554	557.5	557
	1.561	556.5	557.5	559
	1.562	557	557.5	557
	1.563	553.5	558.5	555
	1.564	555.5	562	556
	1.565	556.5	559	553.5
	1.566	556	557.5	557
	1.567	554	561	554.5
	1.568	555	555	553
	1.569	554	558.5	552
	1.57	556	554.5	554
	1.571	554	557.5	555
	1.572	557.5	559.5	555
	1.573	554.5	557	554
	1.574	553.5	559	557.5
	1.575	552.5	560.5	557
	1.576	556	558.5	553.5
	1.577	558	558	553
	1.578	554	556.5	554.5
	1.579	556.5	560	552
	1.58	552	561	556.5
	1.581	554.5	563	559.5
	1.582	555	558	553.5
	1.583	554	559.5	554
	1.584	554.5	560.5	553.5
	1.585	556.5	560.5	554.5
	1.586	554	557	554.5
	1.587	556	557	552.5
	1.588	556	558.5	554.5
	1.589	553	561.5	555
	1.59	554	560	549.5
	1.591	554	560.5	554
	1.592	557.5	557.5	554.5
	1.593	558	557	555
	1.594	556	559	554
	1.595	559.5	560.5	554
	1.596	555	560.5	553.5
	1.597	554.5	558	555
	1.598	557.5	558	556
	1.599	553	556	553.5
	1.6	560	558.5	553.5
	1.601	557.5	556	557
	1.602	554	558.5	554
	1.603	555	559.5	553.5
	1.604	556	558	552.5
	1.605	560	558	557
	1.606	560.5	559	556.5
	1.607	557.5	561	554.5
	1.608	555	556.5	556.5
	1.609	556	558.5	554
	1.61	554	559.5	556
	1.611	555	560.5	555
	1.612	557	559	558
	1.613	558	561.5	554
	1.614	556	560.5	553.5
	1.615	555	560.5	552
	1.616	560	559.5	557
	1.617	557.5	560	553
	1.618	559	560.5	554.5
	1.619	562.5	560.5	554
	1.62	555	561	556.5
	1.621	560	558.5	559.5
	1.622	558	558	558
	1.623	557.5	558	556
	1.624	557.5	559.5	557
	1.625	561	561.5	557.5
	1.626	554.5	559	556.5
	1.627	559	563.5	554
	1.628	556	558.5	556
	1.629	557.5	557.5	557
	1.63	559	559	556.5
	1.631	555	562	557
	1.632	556.5	560.5	557.5
	1.633	561	559.5	558.5
	1.634	558	560.5	559
	1.635	556.5	559.5	557
	1.636	556.5	563	554.5
	1.637	557	560	558
	1.638	561.5	560	558
	1.639	559	560	556
	1.64	561	562	558
	1.641	557.5	559.5	558
	1.642	557	558.5	563
	1.643	557	561.5	559
	1.644	558	557.5	559.5
	1.645	557	562	561.5
	1.646	559	557.5	559
	1.647	558	560.5	559
	1.648	559.5	560	557
	1.649	556	560.5	560.5
	1.65	559	557	562
	1.651	556.5	560	554
	1.652	558	559.5	558
	1.653	556.5	561	557.5
	1.654	558	554.5	558
	1.655	562.5	561	560
	1.656	558.5	560.5	560.5
	1.657	555	556.5	562
	1.658	560	560	559.5
	1.659	558.5	558	560.5
	1.66	558.5	558.5	562.5
	1.661	560.5	561.5	562.5
	1.662	560	558.5	563.5
	1.663	561	560	561.5
	1.664	558.5	555	560.5
	1.665	564.5	558.5	560
	1.666	558	558.5	560
	1.667	561	559.5	563.5
	1.668	555	557	563
	1.669	561.5	559.5	562
	1.67	562	556.5	561
	1.671	560	560.5	561
	1.672	559	555	563.5
	1.673	556	557	565.5
	1.674	559.5	556.5	563
	1.675	560	557	564.5
	1.676	559	554.5	565.5
	1.677	561	556.5	567
	1.678	560.5	558.5	565.5
	1.679	560.5	556	562
	1.68	557.5	556.5	565
	1.681	559.5	557.5	561.5
	1.682	560.5	556	565.5
	1.683	560.5	559	563
	1.684	559	554	564.5
	1.685	559.5	559	562.5
	1.686	559.5	559	566.5
	1.687	555	557.5	563.5
	1.688	558.5	558.5	564
	1.689	560.5	556.5	563
	1.69	561.5	557	567.5
	1.691	558	559	564.5
	1.692	557	562.5	566.5
	1.693	558.5	556.5	566.5
	1.694	560.5	559	567
	1.695	560.5	557.5	565
	1.696	559	555	565
	1.697	559.5	558	566.5
	1.698	559.5	555.5	564
	1.699	554.5	559	564.5
	1.7	559	557.5	569
	1.701	560.5	558	563
	1.702	555	557.5	565
	1.703	554	559	561.5
	1.704	560	560.5	562
	1.705	557.5	556.5	562.5
	1.706	556	557	565
	1.707	555	558.5	566
	1.708	555	556.5	563.5
	1.709	560.5	560.5	567.5
	1.71	557	557.5	564.5
	1.711	555	557.5	562.5
	1.712	557.5	558	566.5
	1.713	557	554.5	565.5
	1.714	560.5	554.5	564.5
	1.715	556.5	557	564
	1.716	555	554	565
	1.717	555.5	554.5	561.5
	1.718	555	559	562
	1.719	558	558.5	562.5
	1.72	557.5	555	565.5
	1.721	554	558	567
	1.722	556.5	558	566
	1.723	560	552.5	563
	1.724	555	556.5	567
	1.725	555	558.5	566
	1.726	557	553	565
	1.727	555.5	554.5	564
	1.728	552	553.5	564
	1.729	552	556.5	566.5
	1.73	553.5	555	566.5
	1.731	552.5	560.5	557.5
	1.732	550.5	554	563.5
	1.733	551.5	560.5	560.5
	1.734	554	556	564
	1.735	552	554	559.5
	1.736	554	557	563.5
	1.737	557	556.5	562.5
	1.738	553.5	558.5	562
	1.739	551.5	557	560.5
	1.74	554	554	564.5
	1.741	554	555	562
	1.742	552	552	564
	1.743	553.5	555	563.5
	1.744	554.5	554.5	561.5
	1.745	553	559	562
	1.746	553	554.5	563.5
	1.747	552	557.5	563.5
	1.748	554.5	555	564.5
	1.749	555	554	563.5
	1.75	552	554	563
	1.751	550.5	555	565
	1.752	555.5	554	561.5
	1.753	554	557.5	560
	1.754	554	557	562.5
	1.755	551.5	552.5	561
	1.756	550	553.5	562.5
	1.757	554	554	561
	1.758	553	554.5	562
	1.759	554	558	561.5
	1.76	553	554.5	560.5
	1.761	552.5	555	563.5
	1.762	554.5	554.5	558
	1.763	552.5	554.5	560.5
	1.764	553.5	554.5	559
	1.765	553.5	557	560.5
	1.766	554	556	563.5
	1.767	553	556	560
	1.768	552.5	553.5	562
	1.769	553.5	556.5	562.5
	1.77	551.5	554	561.5
	1.771	555	555	558.5
	1.772	554.5	555	562.5
	1.773	554	553.5	558
	1.774	552.5	555	558.5
	1.775	552.5	554	561
	1.776	554.5	554.5	560.5
	1.777	553	556.5	561.5
	1.778	554	555	559.5
	1.779	551.5	554	561.5
	1.78	556.5	557.5	561
	1.781	554.5	554	560
	1.782	554	556	561.5
	1.783	553.5	558.5	556.5
	1.784	554	555	559
	1.785	556	555	558
	1.786	555	555	560
	1.787	553.5	553	560
	1.788	557.5	554.5	559
	1.789	555	554	561
	1.79	557	556	559
	1.791	555	557.5	557
	1.792	555	557	560.5
	1.793	556.5	560	558.5
	1.794	558	556.5	556.5
	1.795	555	559	559
	1.796	557	557	557
	1.797	554.5	558	554
	1.798	555	558.5	554.5
	1.799	556.5	555	560.5
	1.8	559	555.5	560.5
	1.801	556.5	560	558
	1.802	559	556.5	559
	1.803	555	559	556
	1.804	559	555.5	558
	1.805	555	554.5	555
	1.806	556.5	555.5	556.5
	1.807	558.5	554.5	556.5
	1.808	554.5	557.5	558.5
	1.809	558	559.5	558.5
	1.81	555	557.5	558
	1.811	557	559	555
	1.812	561	556.5	557.5
	1.813	557	559	554.5
	1.814	555	558	558.5
	1.815	559	558	557
	1.816	556.5	560	556.5
	1.817	560.5	557.5	555
	1.818	559	560	557.5
	1.819	559	558	553
	1.82	559.5	558.5	553
	1.821	555	555.5	552.5
	1.822	558	559.5	554
	1.823	559	556	557.5
	1.824	561.5	559.5	556.5
	1.825	557	560	554.5
	1.826	560.5	557.5	553
	1.827	560.5	558.5	557
	1.828	560.5	558	555
	1.829	559	557	555
	1.83	561.5	557	555
	1.831	560.5	554.5	553
	1.832	560	559.5	558
	1.833	559.5	557	555
	1.834	558.5	560.5	553.5
	1.835	558	559	554.5
	1.836	562.5	562	554
	1.837	562.5	556.5	556.5
	1.838	558	557.5	557
	1.839	560.5	559	553.5
	1.84	561	562	557.5
	1.841	560	560	554.5
	1.842	564.5	558.5	554.5
	1.843	561	561.5	557
	1.844	558.5	559	557
	1.845	562	560	559.5
	1.846	563	559	555.5
	1.847	562	559.5	557
	1.848	563.5	560	552.5
	1.849	563.5	561.5	554
	1.85	562.5	561.5	557.5
	1.851	562.5	562	554.5
	1.852	565	560.5	559
	1.853	564.5	561.5	556
	1.854	563.5	560	557
	1.855	563.5	560.5	554
	1.856	564	560.5	556.5
	1.857	567.5	562	557
	1.858	563.5	561.5	557.5
	1.859	566	562	557.5
	1.86	565	561	556
	1.861	566.5	560.5	558
	1.862	565.5	560	557.5
	1.863	567.5	558.5	556
	1.864	566	560	555.5
	1.865	567.5	563.5	557
	1.866	566.5	562.5	558.5
	1.867	567	561.5	559
	1.868	563.5	560.5	557.5
	1.869	567	560.5	556.5
	1.87	565	561.5	556.5
	1.871	567.5	555	560
	1.872	567.5	559	560.5
	1.873	569	562.5	562
	1.874	565	563	559.5
	1.875	564.5	561	560.5
	1.876	563.5	563	557.5
	1.877	566	561	560
	1.878	565.5	561	560.5
	1.879	563.5	560	560
	1.88	565.5	562	559
	1.881	566	560	562.5
	1.882	565	561	558
	1.883	565.5	560.5	561.5
	1.884	566.5	558.5	557.5
	1.885	567.5	560.5	560
	1.886	563.5	559.5	558
	1.887	563.5	562.5	559.5
	1.888	566	559	557
	1.889	566.5	562	562
	1.89	563	560	554.5
	1.891	564	556.5	556
	1.892	563.5	561.5	560
	1.893	562.5	560.5	558.5
	1.894	564	560.5	557
	1.895	564.5	560	558.5
	1.896	562.5	558.5	559
	1.897	564.5	560	557
	1.898	563.5	559.5	558
	1.899	560.5	561	560.5
	1.9	564.5	562	560.5
	1.901	563	559.5	554
	1.902	562	557.5	558
	1.903	560.5	559.5	554.5
	1.904	561	558	553.5
	1.905	560.5	561.5	555
	1.906	560.5	561	554
	1.907	562	560	552
	1.908	562.5	559	554.5
	1.909	561.5	561.5	555
	1.91	560.5	564.5	551.5
	1.911	560	560.5	550
	1.912	559	560.5	554.5
	1.913	563.5	560	554
	1.914	561.5	559.5	552.5
	1.915	560	560.5	550
	1.916	557.5	563	551
	1.917	559	562.5	554
	1.918	561.5	564.5	554.5
	1.919	557	562.5	553.5
	1.92	560.5	563.5	551.5
	1.921	558.5	561	553
	1.922	560.5	561.5	547
	1.923	560.5	561	552.5
	1.924	560	560	551
	1.925	563	560.5	547
	1.926	560.5	562	547.5
	1.927	561.5	564	549.5
	1.928	560	562	550
	1.929	559	564	549
	1.93	560.5	561.5	549
	1.931	560	564	549.5
	1.932	559.5	562	550
	1.933	560.5	563.5	547
	1.934	561	562	549
	1.935	560.5	562.5	550.5
	1.936	558.5	560.5	548.5
	1.937	561.5	560.5	548.5
	1.938	558.5	562.5	551
	1.939	561	564.5	548.5
	1.94	559	566	549.5
	1.941	560.5	562.5	547
	1.942	558	564	551.5
	1.943	557	562	547
	1.944	559.5	560.5	549
	1.945	558.5	563	551
	1.946	561.5	564.5	550.5
	1.947	558	566.5	547
	1.948	559.5	566	547.5
	1.949	559	563.5	550
	1.95	556.5	564	550
	1.951	560.5	564.5	549.5
	1.952	555	565.5	550
	1.953	555	566.5	549
	1.954	556	563.5	551
	1.955	561.5	562.5	549.5
	1.956	559.5	561.5	548.5
	1.957	556	563.5	547.5
	1.958	554.5	563.5	545
	1.959	558	566.5	550
	1.96	559	566.5	547.5
	1.961	557.5	565	550.5
	1.962	560	565	547
	1.963	559	566.5	548.5
	1.964	554.5	562.5	546.5
	1.965	554	561.5	554
	1.966	555	565	548.5
	1.967	554	561.5	545
	1.968	558	563.5	549.5
	1.969	556	563.5	551
	1.97	555	564.5	545.5
	1.971	557.5	563	548.5
	1.972	558	562	543.5
	1.973	555	566	541.5
	1.974	557	565	547
	1.975	554.5	561	544
	1.976	555	561	545
	1.977	555	563.5	543.5
	1.978	557	564.5	543
	1.979	554	564	540
	1.98	557.5	565	540
	1.981	554	565.5	538
	1.982	551.5	562.5	536
	1.983	554.5	566.5	539
	1.984	553	562.5	537.5
	1.985	558.5	565	536.5
	1.986	556	561.5	534
	1.987	554	560.5	531.5
	1.988	554.5	562	532
	1.989	556.5	562.5	530
	1.99	554	562	528
	1.991	555	564	528
	1.992	554	560.5	524.5
	1.993	551	562.5	519.5
[truncated: 6,006 more rows]

## Sheet: B
DataTypeVer2.0	Time	Fz	Fz	Fz
NumberOfData		8000	8000	8000
PreTriggerData		0	0	0
SamplingTime[ms]		1	1	1
DataLabel		Y1:CMJ	Y2:CMJ	Y3:CMJ
DataUnit	sec	N	N	N
	0	755	729	726.5
	0.001	754	726.5	727.5
	0.002	759	724.5	725
	0.003	754.5	727.5	726
	0.004	759	725	729
	0.005	758.5	725	726.5
	0.006	756	725	725
	0.007	759	726	726.5
	0.008	759	729	725
	0.009	760	729	728.5
	0.01	760.5	728	727.5
	0.011	759	725	726.5
	0.012	760.5	726	728.5
	0.013	759	728.5	728
	0.014	761	729	728
	0.015	765.5	724	726
	0.016	764	727	729
	0.017	761	726	725
	0.018	762.5	727	726.5
	0.019	761.5	725	727.5
	0.02	757	725.5	725
	0.021	761	728	729
	0.022	761.5	727	727
	0.023	756.5	726.5	728
	0.024	757.5	730	726.5
	0.025	759	728.5	727
	0.026	758	726	725
	0.027	757.5	729	729
	0.028	757.5	729	728
	0.029	760	727.5	728.5
	0.03	759	730	727
	0.031	754.5	731	729
	0.032	758	728.5	727.5
	0.033	752	729	727.5
	0.034	753	730.5	726.5
	0.035	751	727	724.5
	0.036	751.5	729	725
	0.037	752	727	727.5
	0.038	752.5	731	724.5
	0.039	748.5	729	729.5
	0.04	745.5	731.5	725.5
	0.041	748	728	726.5
	0.042	747	728.5	729
	0.043	744	730	727.5
	0.044	743.5	731.5	729
	0.045	744	733	728.5
	0.046	742	729	722.5
	0.047	744	731.5	724.5
	0.048	741	730.5	730.5
	0.049	737.5	729	727.5
	0.05	734.5	729	725.5
	0.051	735.5	732.5	727.5
	0.052	732.5	727	726
	0.053	731.5	729	726.5
	0.054	730	732.5	724
	0.055	727	729	726
	0.056	729	729	729
	0.057	725.5	728	726.5
	0.058	727	728	727.5
	0.059	723.5	725	728
	0.06	726	729	729
	0.061	725	726	727
	0.062	723	727	727
	0.063	720	729	729
	0.064	719	729	725
	0.065	719.5	729	726.5
	0.066	717	729	726.5
	0.067	719.5	726	726.5
	0.068	715.5	725	725
	0.069	715	727	727.5
	0.07	717	729	728.5
	0.071	713.5	728.5	723.5
	0.072	714	728.5	726.5
	0.073	715	725	727
	0.074	711	723	726
	0.075	712.5	723.5	725
	0.076	713.5	723.5	728.5
	0.077	712.5	726.5	725
	0.078	709	727	727.5
	0.079	708.5	727.5	728.5
	0.08	706.5	725.5	728.5
	0.081	708.5	725	725
	0.082	711	723.5	723.5
	0.083	707	726	725
	0.084	706.5	726.5	728.5
	0.085	707.5	725	726.5
	0.086	709.5	725	727
	0.087	709	725.5	729
	0.088	706	724	725
	0.089	706.5	720.5	728
	0.09	708.5	725	727.5
	0.091	709.5	725	725
	0.092	706	724.5	723.5
	0.093	706.5	725	725
	0.094	708	721	724
	0.095	707.5	725	725
	0.096	712.5	724.5	726
	0.097	711.5	724	728.5
	0.098	710	723	726
	0.099	709	723.5	730
	0.1	711	722	726
	0.101	711	722.5	725
	0.102	714	723.5	726
	0.103	715.5	722.5	726
	0.104	714	722.5	724.5
	0.105	714	720.5	724
	0.106	713.5	725.5	731.5
	0.107	715	724	729
	0.108	714	723.5	725
	0.109	715	724.5	726
	0.11	719.5	726.5	728
	0.111	720.5	722.5	728
	0.112	723.5	723.5	728.5
	0.113	721.5	723	724
	0.114	721	725	725
	0.115	723.5	721.5	727
	0.116	723.5	724.5	724
	0.117	727.5	719	725.5
	0.118	725	722.5	726
	0.119	728	723	728.5
	0.12	728	720.5	728.5
	0.121	729	724	726.5
	0.122	731.5	722.5	722
	0.123	731.5	722	726.5
	0.124	734	725	725
	0.125	732.5	726	727
	0.126	736.5	727.5	726
	0.127	737.5	725	727.5
	0.128	736.5	725	726.5
	0.129	738.5	721.5	727.5
	0.13	738.5	725	729
	0.131	741.5	723.5	727.5
	0.132	743.5	725	731
	0.133	742	727	730
	0.134	743	724.5	730.5
	0.135	746	726.5	726
	0.136	740.5	721.5	727.5
	0.137	744	725	726
	0.138	748	725	726
	0.139	750.5	725	727
	0.14	752.5	724	729
	0.141	748.5	722.5	729
	0.142	752	730.5	728.5
	0.143	753.5	726.5	729
	0.144	755.5	728.5	728
	0.145	754.5	725.5	729
	0.146	752.5	724.5	729
	0.147	753.5	728	727.5
	0.148	753	725.5	725.5
	0.149	758	728.5	729
	0.15	756	728	730.5
	0.151	759	726.5	727.5
	0.152	757.5	725	725.5
	0.153	761	726.5	728
	0.154	763	729	726.5
	0.155	761	728.5	727.5
	0.156	761.5	728.5	728
	0.157	759	728.5	730.5
	0.158	760.5	726.5	730.5
	0.159	762	729	728
	0.16	763.5	726	729
	0.161	763.5	728.5	728
	0.162	760	729	728
	0.163	767.5	725	730.5
	0.164	764.5	725.5	728.5
	0.165	762	727.5	723
	0.166	766	725	727
	0.167	765.5	725.5	727.5
	0.168	764	725	726.5
	0.169	766	725.5	730.5
	0.17	768	724.5	727
	0.171	766	728.5	726
	0.172	764	726.5	727
	0.173	765.5	724	727
	0.174	766.5	726	726.5
	0.175	763.5	724.5	725
	0.176	766.5	725	725
	0.177	767	725	729
	0.178	766	727	725
	0.179	764	721.5	726.5
	0.18	764.5	726.5	725
	0.181	766.5	725	725
	0.182	762.5	726	728.5
	0.183	766	721	720.5
	0.184	766	723.5	725.5
	0.185	766	724	727.5
	0.186	764	725	725
	0.187	765.5	723.5	724.5
	0.188	764.5	723	726.5
	0.189	762.5	723	729
	0.19	765	725	724
	0.191	765.5	722.5	724.5
	0.192	759	726.5	725.5
	0.193	763.5	726	725
	0.194	759	723.5	726
	0.195	757	722	728.5
	0.196	759	722.5	729
	0.197	757	727.5	725
	0.198	755.5	726	725.5
	0.199	757.5	721.5	725.5
	0.2	755.5	726.5	727.5
	0.201	753.5	723.5	726.5
	0.202	754.5	723.5	727
	0.203	753	723.5	727
	0.204	751	722	726.5
	0.205	753.5	726.5	723.5
	0.206	751	722.5	727.5
	0.207	750	722	725.5
	0.208	752.5	721	725
	0.209	747.5	724	727
	0.21	746	725	724.5
	0.211	744	725	726
	0.212	744	727	725
	0.213	746	724.5	722.5
	0.214	742	723.5	726.5
	0.215	740.5	725	725.5
	0.216	741.5	723.5	725
	0.217	741	725.5	729
	0.218	738.5	726	726.5
	0.219	741.5	726	728
	0.22	740	724	727.5
	0.221	741	723	725
	0.222	736.5	725	726.5
	0.223	734	725.5	726
	0.224	738.5	723.5	730.5
	0.225	736	727	727
	0.226	735	729	725.5
	0.227	734.5	724	726.5
	0.228	728	723	726.5
	0.229	733.5	725	725
	0.23	730.5	726.5	729
	0.231	730.5	724	725
	0.232	733	727.5	725
	0.233	731.5	727.5	725
	0.234	729	723.5	727
	0.235	730.5	725	727
	0.236	727.5	724.5	726
	0.237	724.5	727	727
	0.238	725.5	725	725.5
	0.239	723.5	728.5	727
	0.24	725.5	727.5	728
	0.241	725	725	727.5
	0.242	725	727.5	726.5
	0.243	725.5	726.5	728.5
	0.244	724.5	726	726.5
	0.245	722.5	728	725
	0.246	722.5	724	725
	0.247	720.5	724.5	727.5
	0.248	723	726	725
	0.249	724	727.5	725.5
	0.25	720.5	727	728
	0.251	722.5	726.5	726
	0.252	723	729	727.5
	0.253	719	724	726.5
	0.254	718	727	727.5
	0.255	718.5	728.5	727.5
	0.256	716.5	725	725
	0.257	720	728.5	724.5
	0.258	719.5	723.5	729
	0.259	721	729	728.5
	0.26	714	726	724.5
	0.261	714	726	725
	0.262	716	728.5	728.5
	0.263	720.5	728.5	727.5
	0.264	716.5	729	725
	0.265	717.5	726	727
	0.266	715	728.5	727
	0.267	714	729	724.5
	0.268	716	729	727
	0.269	713	727.5	726.5
	0.27	715.5	726	725
	0.271	715.5	726.5	725.5
	0.272	711	730	725.5
	0.273	717	726	725.5
	0.274	714	728.5	728
	0.275	713	726.5	728.5
	0.276	711	729	727.5
	0.277	711	730	727
	0.278	715	727	725
	0.279	706.5	731.5	725.5
	0.28	714	731	728.5
	0.281	713	731.5	729
	0.282	706.5	729	727
	0.283	710	728.5	728
	0.284	709	729	727
	0.285	713	729	728
	0.286	711	730	729
	0.287	711	726.5	728
	0.288	712.5	731.5	727
	0.289	712	726	727
	0.29	711	728.5	724.5
	0.291	712	731.5	727.5
	0.292	710.5	729	726
	0.293	709	731.5	728
	0.294	712	729	726
	0.295	711.5	722.5	726.5
	0.296	708	729	725.5
	0.297	708.5	730	726.5
	0.298	711	731.5	726
	0.299	709.5	728	722.5
	0.3	709	728	725
	0.301	713.5	729	723.5
	0.302	711	726.5	727
	0.303	710	726	729
	0.304	711	729	726.5
	0.305	712	731	726.5
	0.306	711.5	728	729
	0.307	716	724.5	723.5
	0.308	710	731.5	727
	0.309	708.5	729	726.5
	0.31	709	731	728.5
	0.311	713	728	725.5
	0.312	715.5	727.5	723.5
	0.313	710.5	729	725
	0.314	713	728	725
	0.315	710.5	727.5	727.5
	0.316	712	728	725.5
	0.317	714	729	725
	0.318	711.5	727.5	725
	0.319	714	730.5	724.5
	0.32	716	726	727
	0.321	714	730.5	726.5
	0.322	713.5	731	726.5
	0.323	715.5	729	726
	0.324	710.5	728	730
	0.325	713.5	724.5	723
	0.326	710	727.5	724
	0.327	713	726	725
	0.328	713.5	728	725
	0.329	715	729	722.5
	0.33	714.5	729	728
	0.331	712.5	731	725
	0.332	718.5	729	725
	0.333	714	727.5	728.5
	0.334	715.5	731.5	725
	0.335	719.5	730.5	728.5
	0.336	717.5	729	727
	0.337	718	732.5	729
	0.338	719.5	729	728
	0.339	718.5	727	726.5
	0.34	718.5	727.5	725
	0.341	721	726	725
	0.342	720.5	725	726
	0.343	721.5	728	726
	0.344	720	725	728
	0.345	718	728.5	726.5
	0.346	720	732.5	725
	0.347	723	729	727
	0.348	723.5	725.5	724
	0.349	720	727	727
	0.35	723.5	729	725
	0.351	721.5	731	729
	0.352	724.5	727.5	725.5
	0.353	723	726	725
	0.354	724.5	727	725.5
	0.355	722.5	729	726
	0.356	727	728.5	729
	0.357	724	731.5	726
	0.358	723	727	726.5
	0.359	723.5	730	729
	0.36	725	729	725.5
	0.361	726	726.5	726.5
	0.362	726	727	731.5
	0.363	724	728.5	726.5
	0.364	724	730.5	726
	0.365	721	727	728
	0.366	723	726	725.5
	0.367	723.5	727.5	728
	0.368	724	725.5	726.5
	0.369	722.5	726	729
	0.37	724	728.5	726
	0.371	724	728.5	726.5
	0.372	723.5	727.5	724.5
	0.373	723	728.5	729
	0.374	722.5	729	725.5
	0.375	725.5	728	725.5
	0.376	722.5	726	725
	0.377	725	725.5	726
	0.378	722.5	726.5	729
	0.379	724	728	729
	0.38	723	729	726
	0.381	725.5	725	727.5
	0.382	721.5	728	725.5
	0.383	723	728	724.5
	0.384	719.5	724	728
	0.385	719.5	728.5	726
	0.386	721	728	728
	0.387	722.5	727	728.5
	0.388	719	728	727
	0.389	720	726	728
	0.39	720	728.5	727
	0.391	718	726.5	731
	0.392	718	725.5	730
	0.393	717.5	729	728.5
	0.394	715.5	725	728.5
	0.395	717	728	727
	0.396	718.5	725	728
	0.397	713	725	729
	0.398	715	727	731
	0.399	713	724.5	728
	0.4	710	726	728.5
	0.401	715.5	727	726
	0.402	711.5	724.5	729
	0.403	710	728.5	728.5
	0.404	710	724.5	729.5
	0.405	710.5	730	726
	0.406	705	726.5	725.5
	0.407	706.5	729	731
	0.408	706	724	730
	0.409	705	726	731.5
	0.41	710.5	728.5	727
	0.411	705	728	726
	0.412	702.5	728.5	727.5
	0.413	704.5	726.5	727
	0.414	704.5	726	729
	0.415	702.5	729	725
	0.416	703.5	727	728.5
	0.417	704	727.5	728
	0.418	703	731	728
	0.419	698.5	727	723
	0.42	702.5	728	729
	0.421	701	726	727.5
	0.422	696	729	727.5
	0.423	696.5	726.5	731.5
	0.424	695.5	725	723.5
	0.425	696	728	726.5
	0.426	698	726.5	726.5
	0.427	695	726	724.5
	0.428	694.5	721.5	728.5
	0.429	694.5	727	725
	0.43	695	727.5	728
	0.431	691	731.5	725.5
	0.432	693	725	722.5
	0.433	693.5	724.5	728
	0.434	691	725	728
	0.435	691.5	724	730.5
	0.436	690.5	724.5	724
	0.437	693.5	728.5	724.5
	0.438	689	730	727
	0.439	690.5	725.5	726
	0.44	692.5	727.5	725.5
	0.441	689	726.5	728.5
	0.442	690.5	728	726
	0.443	691	726.5	727.5
	0.444	690.5	725	726
	0.445	684	725.5	726
	0.446	687	725	729
	0.447	687	724.5	725
	0.448	684	727	725
	0.449	688	727.5	726
	0.45	683.5	725	727
	0.451	686.5	726	726
	0.452	682.5	725	726
	0.453	692.5	725	725
	0.454	681	725	725.5
	0.455	686	726	726.5
	0.456	686	727.5	731
	0.457	684	722	728.5
	0.458	682.5	726.5	726
	0.459	682	727	724
	0.46	680.5	725	725.5
	0.461	679.5	725	727.5
	0.462	684	725	728.5
	0.463	681.5	726	727
	0.464	682.5	726	726
	0.465	678	725	729
	0.466	684	727	727
	0.467	677	725	728.5
	0.468	680.5	723.5	724.5
	0.469	680	725	725
	0.47	680	729	725
	0.471	681	729	726
	0.472	679	728	725.5
	0.473	681	725	724
	0.474	680.5	727.5	727.5
	0.475	680	726	724.5
	0.476	679	728.5	725
	0.477	679.5	725	726.5
	0.478	681.5	728	726
	0.479	679.5	726	726
	0.48	680	730.5	725
	0.481	678.5	725.5	725
	0.482	684	728	725
	0.483	683	729	725
	0.484	682	725	724.5
	0.485	681.5	727	725
	0.486	682.5	725.5	726
	0.487	684	729	729
	0.488	683.5	728	725
	0.489	684	727	728.5
	0.49	686.5	729	725.5
	0.491	684	727	729
	0.492	685.5	728	728.5
	0.493	684	728	728.5
	0.494	688.5	729	728.5
	0.495	686.5	729	727
	0.496	686.5	726	729
	0.497	689	725.5	728
	0.498	690.5	729	732
	0.499	688.5	728	731.5
	0.5	688	727.5	728.5
	0.501	691	730.5	726
	0.502	691	731.5	731
	0.503	692	729	727.5
	0.504	691	727	731.5
	0.505	692.5	727	729
	0.506	690	727	727
	0.507	693	728	729
	0.508	694.5	728.5	728
	0.509	690.5	730	731.5
	0.51	690.5	728	731.5
	0.511	695	729	727
	0.512	693.5	727.5	730
	0.513	695	726.5	730.5
	0.514	697.5	726.5	730
	0.515	697.5	728	728
	0.516	698	728	729
	0.517	697.5	725.5	728.5
	0.518	698	731.5	729
	0.519	700	727.5	729
	0.52	695.5	725	729
	0.521	700	728.5	728
	0.522	699	728.5	729
	0.523	700.5	725.5	729
	0.524	698.5	728.5	730.5
	0.525	700	726	725
	0.526	703	729	725.5
	0.527	704.5	724.5	728
	0.528	701.5	728	727.5
	0.529	704.5	724.5	729
	0.53	704.5	726.5	727
	0.531	702.5	728.5	726
	0.532	703.5	729	727.5
	0.533	704	729	725.5
	0.534	706.5	729	729
	0.535	706.5	726.5	728
	0.536	705	726.5	727
	0.537	707.5	729.5	727.5
	0.538	708	732	727.5
	0.539	704	729	728.5
	0.54	708.5	728	729
	0.541	710.5	730.5	728.5
	0.542	710	729	726.5
	0.543	708.5	729	727
	0.544	712	728.5	729
	0.545	714	727	728.5
	0.546	713	728.5	726
	0.547	713	729	727
	0.548	712.5	725	725
	0.549	713	725	725
	0.55	713.5	728.5	726.5
	0.551	717	729	726.5
	0.552	716.5	728	723.5
	0.553	717	727	725
	0.554	717.5	729	729
	0.555	719.5	727	726.5
	0.556	721	724.5	725
	0.557	719.5	729	727.5
	0.558	723	728	726
	0.559	727	725	724.5
	0.56	723	726.5	728.5
	0.561	725	727	724.5
	0.562	729	729	726
	0.563	723.5	725.5	724.5
	0.564	727.5	728.5	724.5
	0.565	731	723.5	726.5
	0.566	728.5	727	723
	0.567	730.5	726	728
	0.568	731	722	722.5
	0.569	731.5	726	724.5
	0.57	733.5	726.5	720.5
	0.571	731.5	726	725
	0.572	738.5	725.5	723.5
	0.573	732.5	728.5	727
	0.574	733	726	720.5
	0.575	737.5	726.5	723.5
	0.576	740.5	726.5	724.5
	0.577	739.5	727.5	723
	0.578	741	727	722.5
	0.579	740	724	722.5
	0.58	744	729	724.5
	0.581	743	723.5	722.5
	0.582	744	725	722.5
	0.583	747	726	720.5
	0.584	744	724	725.5
	0.585	749.5	725.5	725.5
	0.586	744	724	720.5
	0.587	751	723.5	724.5
	0.588	748.5	727	722.5
	0.589	745.5	724	722.5
	0.59	748	726	723.5
	0.591	747.5	728	722
	0.592	750.5	725	725
	0.593	752	727.5	720.5
	0.594	751	726	720
	0.595	749.5	724.5	723
	0.596	752.5	725	720
	0.597	749.5	724.5	721.5
	0.598	754	725	724
	0.599	750.5	725	722.5
	0.6	752.5	726.5	723.5
	0.601	758.5	725	723.5
	0.602	754	724.5	722
	0.603	752	721.5	721.5
	0.604	753.5	721.5	725
	0.605	753.5	722.5	723
	0.606	753.5	724	723
	0.607	752.5	724.5	722.5
	0.608	753	723.5	722.5
	0.609	752	725	723.5
	0.61	755	725.5	722.5
	0.611	752	728	722.5
	0.612	750	725	721
	0.613	750.5	725.5	724.5
	0.614	750.5	724.5	723.5
	0.615	753.5	723.5	724
	0.616	751.5	724.5	723.5
	0.617	749.5	724	723.5
	0.618	754	726	723
	0.619	750	723.5	722.5
	0.62	750.5	725.5	720
	0.621	750.5	725	725.5
	0.622	751	721.5	724
	0.623	750	723	724
	0.624	752	723	725
	0.625	746	722.5	722.5
	0.626	748.5	723.5	723.5
	0.627	744	724	724.5
	0.628	745.5	725.5	725.5
	0.629	746.5	723	721.5
	0.63	747	725	725
	0.631	744	722.5	723.5
	0.632	744	723.5	722.5
	0.633	744	726.5	723.5
	0.634	744	722.5	724
	0.635	744	722.5	726.5
	0.636	743	721	723
	0.637	746	723.5	723.5
	0.638	744	721.5	723.5
	0.639	743	720.5	725
	0.64	744	725	724.5
	0.641	744	723.5	723.5
	0.642	741	722.5	725.5
	0.643	741.5	726	725
	0.644	743	722.5	724
	0.645	743.5	723.5	726
	0.646	744	725	725.5
	0.647	743	721.5	724.5
	0.648	739.5	725.5	721.5
	0.649	739	725	725
	0.65	742	725	721.5
	0.651	743	725	724
	0.652	742	725	725.5
	0.653	743.5	723	722.5
	0.654	740	725	726
	0.655	738	729	726
	0.656	740	727.5	728
	0.657	741.5	726	722.5
	0.658	742	723.5	725.5
	0.659	738.5	725	723.5
	0.66	741	723	724.5
	0.661	735.5	723.5	723.5
	0.662	740	725	724
	0.663	742	726.5	723.5
	0.664	741.5	724.5	721
	0.665	741	728	723
	0.666	743.5	725.5	723
	0.667	740.5	722.5	723.5
	0.668	740	724	725
	0.669	737	725	726
	0.67	740	725	725
	0.671	742.5	724.5	724.5
	0.672	738	725	725
	0.673	738.5	725	724.5
	0.674	740.5	726.5	724.5
	0.675	737.5	727	725
	0.676	738.5	724	728
	0.677	740	727	727
	0.678	738.5	726	721
	0.679	739.5	725.5	728
	0.68	734	728	725
	0.681	734	726.5	731
	0.682	736	723	726.5
	0.683	737	724.5	730.5
	0.684	739	726.5	726
	0.685	733.5	726	729
	0.686	735.5	728	730.5
	0.687	733.5	724.5	728
	0.688	736	726	729
	0.689	733	727.5	729
	0.69	732.5	726	728.5
	0.691	731.5	726	726.5
	0.692	732	729	728
	0.693	730.5	725	724
	0.694	731.5	725	726.5
	0.695	733	724.5	729
	0.696	732.5	727.5	728
	0.697	729	727	730.5
	0.698	732.5	726	728.5
	0.699	731	727	728.5
	0.7	735	727.5	728
	0.701	733.5	723.5	729
	0.702	734.5	728	728
	0.703	736	727.5	728
	0.704	735.5	727	730.5
	0.705	737.5	727.5	729
	0.706	739.5	728.5	729
	0.707	738.5	729	731
	0.708	737.5	725	729
	0.709	742	727.5	729
	0.71	741.5	730	725
	0.711	744	727	730.5
	0.712	744	730.5	729
	0.713	744	728	729
	0.714	741	728	731.5
	0.715	747	729	729
	0.716	745.5	729	728.5
	0.717	746	729	729
	0.718	749	729	729
	0.719	746.5	729	733.5
	0.72	751	727	730
	0.721	748	729	731
	0.722	749.5	733.5	727
	0.723	751	732.5	731.5
	0.724	749	727.5	731.5
	0.725	751.5	730.5	728
	0.726	750.5	731	735.5
	0.727	748	729	731.5
	0.728	750.5	726.5	732
	0.729	749.5	728.5	731.5
	0.73	749	729	733.5
	0.731	748	731	729
	0.732	751	733.5	731
	0.733	754.5	731	730.5
	0.734	751	731	729
	0.735	747.5	735	732
	0.736	750.5	729	731
	0.737	751.5	731.5	731.5
	0.738	749.5	730.5	730.5
	0.739	745.5	734	731
	0.74	748.5	731.5	730.5
	0.741	745.5	732	731.5
	0.742	748.5	729	731.5
	0.743	745.5	734.5	730
	0.744	744	728.5	731
	0.745	746.5	733.5	732.5
	0.746	744	733.5	727.5
	0.747	741	731	729
	0.748	740	731.5	729
	0.749	746.5	732	731.5
	0.75	742	729	729
	0.751	743.5	732.5	731
	0.752	739	729	731.5
	0.753	743	729	729
	0.754	738	729.5	733
	0.755	739.5	728.5	729
	0.756	736.5	730.5	727.5
	0.757	734	728.5	728.5
	0.758	735.5	731.5	732
	0.759	738	731.5	729
	0.76	733.5	728.5	727
	0.761	733.5	727	728
	0.762	732.5	727.5	727
	0.763	734	730.5	729
	0.764	732.5	731	726.5
	0.765	730	731.5	728.5
	0.766	729	731.5	727
	0.767	729	731.5	729
	0.768	731	729	727.5
	0.769	723	729	728
	0.77	727	728	725.5
	0.771	727	730.5	729
	0.772	726.5	728	727
	0.773	728	729	725
	0.774	723	728	726
	0.775	723.5	725.5	727
	0.776	723	725.5	726.5
	0.777	721	727.5	726
	0.778	719.5	724.5	724
	0.779	720	724	726
	0.78	721.5	727.5	726.5
	0.781	720.5	730.5	724
	0.782	723	730.5	728
	0.783	719	729	726
	0.784	720	726	725
	0.785	720	725	726.5
	0.786	714.5	725	728
	0.787	718	725	724
	0.788	715.5	728	724.5
	0.789	717	725	721.5
	0.79	716	727	726
	0.791	711.5	725	725
	0.792	716.5	725	726
	0.793	714	724.5	724
	0.794	713.5	725.5	724.5
	0.795	714	723	727.5
	0.796	713	726	724.5
	0.797	714	725	725.5
	0.798	710	725	727
	0.799	709	725	723.5
	0.8	710	727.5	725
	0.801	711	724	725
	0.802	708	724.5	725
	0.803	706	727	730
	0.804	709	724	723
	0.805	709.5	725	727.5
	0.806	707.5	724.5	724.5
	0.807	705	723.5	725
	0.808	712	722.5	724.5
	0.809	708	724	725
	0.81	710	726.5	724.5
	0.811	704.5	726	726.5
	0.812	706.5	724	724
	0.813	706	724.5	724.5
	0.814	706.5	726	726
	0.815	704.5	728	721
	0.816	708	725	725
	0.817	705	728	725
	0.818	704	723	724.5
	0.819	708.5	724.5	726
	0.82	705	726	721.5
	0.821	705	724.5	724.5
	0.822	708.5	723.5	722.5
	0.823	706.5	725	721.5
	0.824	708	725	724.5
	0.825	709.5	725	728
	0.826	708.5	725	723
	0.827	708.5	727	724.5
	0.828	707.5	725	722
	0.829	708	725	724.5
	0.83	708	724.5	725.5
	0.831	706.5	726	724.5
	0.832	710	725	721.5
	0.833	709.5	726	726
	0.834	712.5	725.5	723.5
	0.835	707	725.5	728
	0.836	711.5	729	725
	0.837	710	724.5	722.5
	0.838	711	725	726
	0.839	708	727.5	726
	0.84	712.5	725.5	726.5
	0.841	714	724.5	724
	0.842	712	726	725
	0.843	711.5	723.5	725
	0.844	712	725	722.5
	0.845	714	725.5	727
	0.846	711	725	725
	0.847	713	724.5	726
	0.848	714	727	725
	0.849	711.5	725	724.5
	0.85	711.5	726.5	727
	0.851	713	727	725.5
	0.852	712	726	725.5
	0.853	713	727.5	726
	0.854	715	726	723.5
	0.855	717	725	727.5
	0.856	717.5	725	726
	0.857	715	723.5	726
	0.858	719	724.5	726
	0.859	714.5	723.5	726.5
	0.86	717.5	721.5	725
	0.861	717	725.5	728
	0.862	717.5	726	727
	0.863	718	721.5	726.5
	0.864	719.5	725	726
	0.865	718.5	725	725
	0.866	720	725	724.5
	0.867	718	722	722
	0.868	719	725	725.5
	0.869	719.5	725.5	725
	0.87	717.5	725	724.5
	0.871	722.5	726.5	724
	0.872	717.5	725.5	727.5
	0.873	719	724	726.5
	0.874	724.5	721	723.5
	0.875	718.5	725	726
	0.876	719.5	724	727
	0.877	723	726.5	725
	0.878	723	724	725
	0.879	723	723.5	729
	0.88	721	726.5	725
	0.881	721	725	725.5
	0.882	723.5	725	725
	0.883	725	725	726
	0.884	723.5	723.5	725
	0.885	722.5	725.5	723.5
	0.886	725	724	725.5
	0.887	725	725	727
	0.888	724.5	728.5	726
	0.889	726.5	725	725.5
	0.89	724.5	722.5	725
	0.891	725	728.5	728
	0.892	725	725	726
	0.893	728.5	727	726
	0.894	725	729	725
	0.895	729	725.5	724
	0.896	728.5	724.5	724.5
	0.897	726.5	728	721
	0.898	726	727.5	725.5
	0.899	729	727	723.5
	0.9	728	727	729
	0.901	726.5	728	725.5
	0.902	729	728.5	727
	0.903	728	727	725
	0.904	727	728.5	725
	0.905	726	726	727
	0.906	729	725	724.5
	0.907	725	726.5	725
	0.908	726	728	724
	0.909	725.5	727	725.5
	0.91	726.5	728.5	724.5
	0.911	727.5	727	726.5
	0.912	726	727	726.5
	0.913	726	728.5	725
	0.914	725	729	726.5
	0.915	725.5	729	725
	0.916	725.5	726.5	725
	0.917	725.5	727	726.5
	0.918	726	725.5	727.5
	0.919	725.5	726.5	726.5
	0.92	721.5	728.5	725.5
	0.921	725.5	725.5	726.5
	0.922	724	727	725
	0.923	725.5	725	726
	0.924	727.5	728	724.5
	0.925	726.5	728.5	724.5
	0.926	724.5	727	726.5
	0.927	729	729	725
	0.928	727	727	726.5
	0.929	725	725	728.5
	0.93	730.5	727	725
	0.931	725	729	725
	0.932	725	729	728.5
	0.933	725	728.5	725.5
	0.934	725.5	731.5	725.5
	0.935	727	727.5	727
	0.936	725.5	728	728.5
	0.937	725	729	726.5
	0.938	729	726.5	728.5
	0.939	724	730	726.5
	0.94	724	728	732.5
	0.941	722.5	729	726
	0.942	725	729	730
	0.943	726.5	729.5	729
	0.944	728	731	729
	0.945	724.5	726	727
	0.946	727	726.5	727
	0.947	725.5	728	728
	0.948	725.5	729	731
	0.949	722	730	729
	0.95	725	729	726.5
	0.951	726.5	726.5	726.5
	0.952	725	731	726.5
	0.953	723.5	731.5	731
	0.954	725	729	731.5
	0.955	724	730	728
	0.956	725.5	729	728
	0.957	725.5	727	727
	0.958	722.5	728	729
	0.959	725	732.5	727.5
	0.96	724.5	729	732
	0.961	722.5	727.5	729.5
	0.962	722.5	727.5	731.5
	0.963	721.5	724.5	727
	0.964	725	728	729
	0.965	722	730.5	726.5
	0.966	721	726	727.5
	0.967	723.5	733	726.5
	0.968	724	726	726
	0.969	723	729.5	730.5
	0.97	720.5	727.5	723.5
	0.971	721.5	725	728
	0.972	723.5	725	727.5
	0.973	724	726.5	725
	0.974	723	727	728
	0.975	719.5	728	726.5
	0.976	723	730.5	727.5
	0.977	721.5	725	726.5
	0.978	723	726	725
	0.979	720	725.5	725
	0.98	721.5	727	727
	0.981	718	725	731.5
	0.982	722	724.5	729
	0.983	725	725	728.5
	0.984	722	725.5	726.5
	0.985	721.5	726	727
	0.986	723.5	722.5	726
	0.987	720.5	725.5	727
	0.988	722.5	728	727.5
	0.989	724.5	723.5	726.5
	0.99	722.5	725	725.5
	0.991	721	725	729
	0.992	721	724.5	728
	0.993	726	724	728
	0.994	729	724.5	729
	0.995	725	725.5	727
	0.996	722.5	725	728
	0.997	726	723.5	727.5
	0.998	720.5	725	730.5
	0.999	723.5	724.5	727
	1	724.5	727.5	725
	1.001	728	725	727.5
	1.002	724	724.5	731.5
	1.003	725	721.5	726.5
	1.004	724	723.5	726
	1.005	726	724.5	725
	1.006	725	721	726
	1.007	724	727.5	726.5
	1.008	723	725	725
	1.009	726	724.5	726
	1.01	725	721.5	729
	1.011	721	723.5	730
	1.012	727	725.5	727.5
	1.013	726.5	724.5	729
	1.014	726.5	724.5	728.5
	1.015	728.5	722.5	730.5
	1.016	728.5	725	726
	1.017	729	724.5	725
	1.018	726	729	729
	1.019	724.5	725.5	726.5
	1.02	728.5	725	725
	1.021	726	725	731.5
	1.022	728	724.5	726
	1.023	729	722	727
	1.024	727	725	727
	1.025	726	724.5	726
	1.026	726	724.5	727.5
	1.027	727	722.5	726
	1.028	727.5	725	725
	1.029	726	724.5	725.5
	1.03	728.5	725	725
	1.031	723.5	725.5	725
	1.032	727	724.5	725
	1.033	728	721	726
	1.034	726	723.5	725
	1.035	726	726	725
	1.036	725	727	729
	1.037	726.5	722	724.5
	1.038	732.5	725	725.5
	1.039	724	720.5	727
	1.04	726	725	723
	1.041	726	723	725
	1.042	727.5	724	726.5
	1.043	729	725	727.5
	1.044	729	725.5	725
	1.045	726	719	724.5
	1.046	727	717	724
	1.047	727.5	724.5	724.5
	1.048	729	721	724.5
	1.049	732.5	725	727
	1.05	731.5	722	724.5
	1.051	729	721.5	723.5
	1.052	732.5	721	729
	1.053	734	724	727
	1.054	731.5	721.5	725
	1.055	734.5	718	726.5
	1.056	733	721	726.5
	1.057	734.5	718	727
	1.058	734.5	724	725.5
	1.059	737.5	720.5	724.5
	1.06	736	718	725
	1.061	737.5	721.5	726
	1.062	734.5	724.5	723.5
	1.063	734.5	724	725.5
	1.064	734	723	724.5
	1.065	735	725	726
	1.066	732	724.5	723
	1.067	736.5	725	724.5
	1.068	735	723	728.5
	1.069	736.5	723	728
	1.07	735	723.5	725.5
	1.071	736.5	724	727
	1.072	736.5	722.5	721.5
	1.073	738	723.5	726
	1.074	738.5	726	725
	1.075	737.5	726	729
	1.076	739.5	722.5	725
	1.077	736.5	727	727
	1.078	738.5	724	725
	1.079	739.5	726.5	728
	1.08	740	725	725
	1.081	738	724	726.5
	1.082	740	728.5	726.5
	1.083	739	725	725
	1.084	740.5	725	725
	1.085	739.5	729	727
	1.086	743.5	725	729
	1.087	739.5	725.5	725
	1.088	744	725.5	725
	1.089	739.5	731.5	728
	1.09	741.5	726	728
	1.091	744	725	726
	1.092	742.5	728	726
	1.093	744	728	727
	1.094	743.5	728	725.5
	1.095	744	728	727.5
	1.096	745.5	728.5	725.5
	1.097	745.5	726.5	725.5
	1.098	744	729	725
	1.099	743.5	725.5	725
	1.1	742	727.5	723
	1.101	744	726	724
	1.102	741.5	731	725
	1.103	743.5	726.5	728
	1.104	738.5	726	728
	1.105	740	728	724.5
	1.106	740	727.5	724.5
	1.107	738.5	729	728
	1.108	740	725.5	726.5
	1.109	742	729	723
	1.11	743	726	723.5
	1.111	743	728.5	728.5
	1.112	738.5	728.5	724.5
	1.113	739	728.5	724
	1.114	737.5	731.5	727
	1.115	738.5	731	725
	1.116	738.5	731.5	727
	1.117	734.5	727	725.5
	1.118	737	729	725.5
	1.119	740.5	731	728.5
	1.12	734	730.5	727.5
	1.121	735.5	729	728
	1.122	735	731.5	725
	1.123	732	726	727
	1.124	732.5	728	724.5
	1.125	732.5	729	728
	1.126	728	727.5	725.5
	1.127	731	729	725
	1.128	731	729	727.5
	1.129	727	732.5	727
	1.13	727	732.5	724.5
	1.131	726.5	730.5	726.5
	1.132	728	731	723
	1.133	727	732	727
	1.134	723.5	729	727.5
	1.135	726.5	731.5	728
	1.136	722.5	727.5	727.5
	1.137	725.5	730	729
	1.138	723	729	731.5
	1.139	724.5	729	725
	1.14	720	732	730.5
	1.141	723.5	729	727.5
	1.142	719.5	729	726
	1.143	718	731.5	730.5
	1.144	722.5	732	729
	1.145	718.5	729	728
	1.146	719	728.5	731.5
	1.147	719	729	728.5
	1.148	718.5	730	726
	1.149	718.5	730.5	726
	1.15	714	729	728
	1.151	718.5	728.5	728.5
	1.152	715.5	730.5	728
	1.153	715.5	727.5	728
	1.154	718	728.5	729
	1.155	714	729	727.5
	1.156	717.5	731	730.5
	1.157	716.5	731.5	728.5
	1.158	716.5	732.5	731
	1.159	719.5	728.5	728.5
	1.16	717	731	728.5
	1.161	714	729	730.5
	1.162	716	727.5	725.5
	1.163	716	728	727
	1.164	717	730.5	725.5
	1.165	716	730.5	729
	1.166	719	728	729
	1.167	715	730.5	725
	1.168	717	728	731
	1.169	715.5	728	727.5
	1.17	717	727.5	728
	1.171	717.5	726	726.5
	1.172	715.5	729	729
	1.173	714	729	727
	1.174	717.5	730.5	727
	1.175	718	727.5	730.5
	1.176	715	727	727.5
	1.177	718.5	731.5	727.5
	1.178	718	729	725.5
	1.179	720.5	726.5	729
	1.18	718	728.5	726.5
	1.181	719.5	729	726.5
	1.182	718.5	731	725.5
	1.183	719.5	728.5	727
	1.184	718.5	728.5	726.5
	1.185	717.5	729	727
	1.186	719	731	722.5
	1.187	718.5	726	724
	1.188	719.5	727.5	723.5
	1.189	718	731.5	726.5
	1.19	721	729	728
	1.191	720.5	726	722.5
	1.192	719	727	722.5
	1.193	719.5	731.5	723.5
	1.194	719	729	722
	1.195	720	726	722
	1.196	721.5	728.5	728
	1.197	718	732.5	725
	1.198	723.5	731	723.5
	1.199	722.5	729	721.5
	1.2	720.5	730	722.5
	1.201	720.5	731.5	721
	1.202	721	729	725
	1.203	720	729	724.5
	1.204	720	729	723.5
	1.205	725	731	721.5
	1.206	721	728	723
	1.207	724	728.5	724.5
	1.208	723	725.5	722
	1.209	722	731	726.5
	1.21	723.5	725.5	729
	1.211	724.5	727.5	722.5
	1.212	722.5	729	726.5
	1.213	724.5	727	725.5
	1.214	722.5	727	723.5
	1.215	724.5	727	724.5
	1.216	723.5	729	726
	1.217	725.5	728	728
	1.218	722.5	725	725.5
	1.219	721.5	727.5	723.5
	1.22	725	727	726
	1.221	722.5	722.5	728
	1.222	721.5	726	725
	1.223	724.5	726	725
	1.224	727.5	725	724.5
	1.225	723	728.5	727
	1.226	725.5	725.5	724
	1.227	723.5	726.5	729
	1.228	724	727.5	729
	1.229	726.5	727	728
	1.23	723.5	727.5	726.5
	1.231	724	725	726.5
	1.232	724.5	726	726.5
	1.233	725.5	726	729
	1.234	724.5	726.5	727.5
	1.235	723	725	725
	1.236	722	725	728
	1.237	724	728.5	729
	1.238	724	730.5	723.5
	1.239	726.5	727.5	723
	1.24	725	727	727
	1.241	725	728.5	725
	1.242	724	726	727
	1.243	722.5	727.5	729
	1.244	723	725.5	731
	1.245	723.5	724.5	729
	1.246	726	725	727.5
	1.247	725	726	728.5
	1.248	724	725	727
	1.249	724	727	726
	1.25	724.5	725	726.5
	1.251	724.5	725.5	729
	1.252	727	725	728
	1.253	722.5	726.5	730.5
	1.254	725	727	727
	1.255	726	723.5	728.5
	1.256	724.5	725	724
	1.257	723.5	724.5	726
	1.258	724.5	727	725.5
	1.259	725	726.5	726.5
	1.26	724.5	725.5	729
	1.261	723	729	731
	1.262	727	725	727.5
	1.263	723.5	725.5	725
	1.264	724	727	727.5
	1.265	727	724	725
	1.266	723	726	727.5
	1.267	723	727.5	726.5
	1.268	723	727	730
	1.269	726	725	725
	1.27	724	729	727
	1.271	723.5	727.5	727.5
	1.272	725	724.5	726
	1.273	724	726	726
	1.274	723.5	726.5	727.5
	1.275	724.5	726.5	731
	1.276	725	724.5	727.5
	1.277	723	729	726
	1.278	723.5	726.5	728.5
	1.279	724.5	725	726
	1.28	723.5	725.5	730.5
	1.281	721.5	727.5	729
	1.282	724.5	725	726.5
	1.283	725.5	728	729
	1.284	723.5	731.5	728
	1.285	725	726	731.5
	1.286	721.5	729	729
	1.287	725	728.5	728
	1.288	722	725.5	726
	1.289	727	728.5	730.5
	1.29	722.5	727	727.5
	1.291	726	729	728.5
	1.292	722	726.5	731.5
	1.293	725	724.5	728.5
	1.294	722.5	728.5	731.5
	1.295	725	727	726.5
	1.296	724.5	731.5	728
	1.297	722.5	729	730.5
	1.298	724	724	729
	1.299	724	729	726
	1.3	727	727.5	731
	1.301	725.5	726	731
	1.302	726	728.5	728.5
	1.303	723.5	727.5	729
	1.304	727	727.5	727.5
	1.305	725	727.5	725
	1.306	725.5	728	729
	1.307	727	727	729
	1.308	728.5	725	732.5
	1.309	728	725.5	727
	1.31	725	725	730.5
	1.311	727	725	731
	1.312	725.5	728	731
	1.313	727.5	726	731
	1.314	729	725	730.5
	1.315	725	724	729
	1.316	728.5	726	728
	1.317	725	724.5	727.5
	1.318	728.5	727.5	729
	1.319	725.5	729	727
	1.32	729	726	730
	1.321	730.5	728	731.5
	1.322	728.5	731.5	732.5
	1.323	723.5	731	730.5
	1.324	726.5	726	731
	1.325	729	722.5	730.5
	1.326	729	729	728
	1.327	729	723	730
	1.328	725	724	729
	1.329	725.5	724	729
	1.33	728.5	726	732
	1.331	726	725.5	730
	1.332	726	726.5	729
	1.333	727	725	727.5
	1.334	722	727	729
	1.335	724.5	725.5	728
	1.336	726.5	725	728.5
	1.337	724.5	725	729
	1.338	723	726	726
	1.339	725.5	725	726
	1.34	726.5	727	727
	1.341	727.5	727.5	724
	1.342	726	726.5	724.5
	1.343	725	723	725.5
	1.344	728	727	729
	1.345	724	723	725
	1.346	720.5	724.5	731
	1.347	725	726	726.5
	1.348	725	727.5	727.5
	1.349	725	728.5	726
	1.35	721	725.5	725
	1.351	725	725	725
	1.352	724	720.5	723.5
	1.353	721.5	727	726.5
	1.354	721.5	728	726.5
	1.355	726.5	725.5	724.5
	1.356	723	728.5	726
	1.357	725.5	727	720
	1.358	723.5	725.5	721
	1.359	725	726.5	724
	1.36	726.5	725.5	723.5
	1.361	725.5	723	723.5
	1.362	724.5	727	725
	1.363	723.5	725.5	721.5
	1.364	727.5	723.5	723.5
	1.365	727	725	723
	1.366	725.5	725.5	723.5
	1.367	725	728	724.5
	1.368	722.5	724.5	719.5
	1.369	725	726	721
	1.37	726.5	724.5	722.5
	1.371	725	725	722
	1.372	724.5	724	721
	1.373	726	722.5	723.5
	1.374	727.5	727	719.5
	1.375	725.5	726.5	724.5
	1.376	726.5	727	726
	1.377	725.5	725	724.5
	1.378	726.5	726.5	719.5
	1.379	729	722.5	724.5
	1.38	728.5	723.5	724
	1.381	728.5	725	726
	1.382	728	728.5	718.5
	1.383	728.5	725	721
	1.384	731	723.5	722.5
	1.385	731.5	723.5	722.5
	1.386	727.5	727.5	724
	1.387	730.5	725	722
	1.388	731.5	725	724.5
	1.389	735.5	725	726
	1.39	728.5	727	726
	1.391	732.5	729	724
	1.392	730	726	721.5
	1.393	732.5	728	724.5
	1.394	731.5	726	723.5
	1.395	729	726	724
	1.396	732.5	724.5	726.5
	1.397	734.5	725	725
	1.398	732	727.5	723
	1.399	728.5	725	726
	1.4	736.5	727.5	724
	1.401	730.5	724.5	725.5
	1.402	733.5	728	723.5
	1.403	731.5	727	726.5
	1.404	729	728.5	724.5
	1.405	731	726.5	724.5
	1.406	733	726	727.5
	1.407	731	727.5	725.5
	1.408	732.5	726	725.5
	1.409	732.5	727.5	726
	1.41	732.5	727	725
	1.411	732	724	726
	1.412	728.5	732.5	728
	1.413	730.5	726.5	724.5
	1.414	733	724.5	727.5
	1.415	732	727.5	727
	1.416	731.5	725	730.5
	1.417	729	726.5	729
	1.418	731	726	728
	1.419	731.5	728	727
	1.42	726.5	726.5	726.5
	1.421	731	728	726
	1.422	731	728.5	727.5
	1.423	728.5	727	725.5
	1.424	730.5	731	726
	1.425	727.5	726.5	725.5
	1.426	729	729	724.5
	1.427	729	728.5	727
	1.428	730	729	726
	1.429	729	725	728.5
	1.43	729	730.5	726.5
	1.431	726	731.5	728
	1.432	727.5	731.5	726.5
	1.433	728	732.5	725
	1.434	727.5	732.5	725
	1.435	725	728	729
	1.436	726	731.5	728.5
	1.437	727	731	728.5
	1.438	727.5	728.5	725
	1.439	727	728	725
	1.44	725.5	729	729
	1.441	725.5	729	726
	1.442	723.5	729	727
	1.443	722	727	727
	1.444	726.5	729	729
	1.445	723.5	729	726.5
	1.446	723	728.5	727.5
	1.447	723.5	729	725.5
	1.448	723	729	725
	1.449	723	729	725
	1.45	723	726	726
	1.451	722	730.5	725.5
	1.452	723.5	727	723
	1.453	725	731.5	724.5
	1.454	721.5	729	724.5
	1.455	724.5	728.5	722.5
	1.456	724	730	729
	1.457	724	726.5	728.5
	1.458	719.5	727	728
	1.459	721.5	726.5	724.5
	1.46	726.5	729	728.5
	1.461	726	728	725.5
	1.462	723	725.5	727
	1.463	720.5	728	729
	1.464	722.5	725	729
	1.465	723	726	727
	1.466	726	727	726
	1.467	722.5	725	729.5
	1.468	724	725.5	723.5
	1.469	725	729	725
	1.47	723	724	726.5
	1.471	726	725	727.5
	1.472	726	726	726.5
	1.473	724.5	727	726.5
	1.474	726	723.5	724.5
	1.475	724.5	727	728
	1.476	725.5	725	725.5
	1.477	727	725	727
	1.478	725	729	727
	1.479	725	727.5	728
	1.48	727	725.5	726.5
	1.481	726	722.5	728
	1.482	727.5	726	729
	1.483	724.5	724.5	727
	1.484	728	725	729
	1.485	725.5	723.5	725.5
	1.486	725	723.5	726
	1.487	724.5	721.5	726
	1.488	724.5	726	729
	1.489	724.5	723	727.5
	1.49	726.5	725	730
	1.491	728.5	722.5	729
	1.492	723.5	721.5	729
	1.493	727	722.5	728
	1.494	725.5	724	730.5
	1.495	722.5	724.5	731.5
	1.496	726.5	724.5	729
	1.497	724.5	722.5	733.5
	1.498	727	721	729
	1.499	725	725	727.5
	1.5	728	725	732
	1.501	728.5	723.5	730
	1.502	724.5	721.5	729
	1.503	727	727	732.5
	1.504	728.5	724.5	729
	1.505	725	723.5	730.5
	1.506	724.5	722.5	731.5
	1.507	726	726	729
	1.508	726.5	724.5	731.5
	1.509	723	725	732
	1.51	724.5	726.5	731.5
	1.511	725	724.5	733
	1.512	724.5	726	729
	1.513	727	722.5	729
	1.514	726	723.5	729
	1.515	725.5	725	731.5
	1.516	725	726	732
	1.517	723	727.5	731.5
	1.518	723.5	723.5	733
	1.519	727	725	728.5
	1.52	725	723.5	731.5
	1.521	725	727	729
	1.522	725	722.5	729
	1.523	720.5	724	731.5
	1.524	725	726.5	728
	1.525	722	724.5	730.5
	1.526	724.5	726	732.5
	1.527	725.5	725	729
	1.528	723	724	731
	1.529	725	723.5	732.5
	1.53	722.5	724	732
	1.531	720	723.5	730.5
	1.532	721	726	728.5
	1.533	721	725	727
	1.534	723	722.5	729
	1.535	719.5	723	726.5
	1.536	721	725.5	725
	1.537	723	725.5	728
	1.538	722.5	725.5	729
	1.539	722.5	725	732
	1.54	720	720.5	731
	1.541	722	728	730
	1.542	726	722.5	727
	1.543	721.5	722.5	724.5
	1.544	724.5	722.5	729
	1.545	727.5	723	725
	1.546	724.5	723.5	726.5
	1.547	723	721.5	726
	1.548	719	722	726
	1.549	721.5	722.5	725.5
	1.55	723	724.5	726.5
	1.551	721.5	725	728
	1.552	723	725	724
	1.553	721.5	722	726
	1.554	725	722	724
	1.555	724	725	724.5
	1.556	720.5	722.5	723.5
	1.557	722.5	727.5	725
	1.558	724	724	724.5
	1.559	720.5	724.5	722.5
	1.56	725	724.5	723.5
	1.561	721	724	728
	1.562	721	724.5	724
	1.563	724	724.5	725
	1.564	723	723.5	725
	1.565	719.5	725	722.5
	1.566	723.5	725	727.5
	1.567	721.5	728.5	726.5
	1.568	718.5	721.5	726
	1.569	723.5	721.5	726.5
	1.57	721.5	725	723.5
	1.571	722.5	724	725
	1.572	721	726.5	719.5
	1.573	722.5	727	724.5
	1.574	721	727	727
	1.575	722	725	723.5
	1.576	723.5	728.5	727
	1.577	723.5	725	725
	1.578	720.5	729	725.5
	1.579	721.5	727.5	724.5
	1.58	722	727	727
	1.581	720.5	726.5	724.5
	1.582	725	729	724.5
	1.583	722	729	726
	1.584	721.5	728	727.5
	1.585	724.5	726	725
	1.586	726.5	728.5	726.5
	1.587	725	727.5	726
	1.588	721.5	731	725
	1.589	725.5	726.5	728
	1.59	723.5	726.5	725
	1.591	723.5	728.5	721
	1.592	724	727	724
	1.593	724.5	725	724.5
	1.594	724	728.5	725
	1.595	723	730.5	725
	1.596	725	727.5	729
	1.597	727	727.5	726.5
	1.598	725.5	727	728.5
	1.599	725	731	727
	1.6	727	726	726
	1.601	724	727	725.5
	1.602	728	726.5	726.5
	1.603	728.5	727	729
	1.604	728.5	728.5	727.5
	1.605	724	728.5	729
	1.606	726.5	728	731.5
	1.607	727.5	729	725
	1.608	729	726.5	727
	1.609	729	728	725
	1.61	729	725	728.5
	1.611	731	729	729
	1.612	729	731	724
	1.613	729	729	727
	1.614	729	729	730
	1.615	731.5	726	728
	1.616	732	726	725.5
	1.617	730.5	728.5	730
	1.618	732.5	725.5	728
	1.619	729	727.5	729
	1.62	732	727	725.5
	1.621	732	727.5	730
	1.622	732	727	725.5
	1.623	733	728.5	728
	1.624	731.5	727	727.5
	1.625	732.5	726.5	724.5
	1.626	731.5	731	723
	1.627	731.5	728	725.5
	1.628	733.5	729	726
	1.629	732	729	728
	1.63	731.5	727	727.5
	1.631	733	729	726
	1.632	727.5	728	724.5
	1.633	729	732	726
	1.634	734.5	732.5	729
	1.635	732	730.5	723
	1.636	733	731.5	728
	1.637	736	730.5	724.5
	1.638	729	731	725
	1.639	732	729	726
	1.64	732.5	730.5	725
	1.641	733.5	729	724.5
	1.642	731.5	731.5	724
	1.643	729	731.5	724
	1.644	728.5	731	721.5
	1.645	729	732.5	723.5
	1.646	731.5	733.5	726
	1.647	726.5	731.5	726
	1.648	730	731	721.5
	1.649	734.5	729	722
	1.65	731.5	735.5	723.5
	1.651	729	728	723
	1.652	727	732	725
	1.653	728	728.5	721.5
	1.654	732.5	731	720.5
	1.655	730.5	731.5	725
	1.656	731	735	725
	1.657	731.5	731.5	723
	1.658	725.5	733.5	721.5
	1.659	731.5	733	725
	1.66	727	733	720.5
	1.661	731.5	731	723.5
	1.662	729.5	732	723.5
	1.663	729	731.5	724.5
	1.664	728	733.5	721
	1.665	727	732.5	724.5
	1.666	729	736	724.5
	1.667	729	734	723
	1.668	729	731.5	720
	1.669	727.5	732.5	723.5
	1.67	726	732	724
	1.671	727	729	722
	1.672	727.5	729	725.5
	1.673	727	733.5	725
	1.674	728	731.5	722
	1.675	726	729	723.5
	1.676	729	727.5	724.5
	1.677	726.5	728	724.5
	1.678	729	731.5	724
	1.679	726	731.5	725
	1.68	726	730.5	726.5
	1.681	731	731	723.5
	1.682	729	731.5	725
	1.683	727	729	728.5
	1.684	726.5	729	724.5
	1.685	729.5	729	726
	1.686	731.5	727	724.5
	1.687	729	729	723.5
	1.688	727	727.5	726
	1.689	729	727	723
	1.69	728.5	729	725
	1.691	729	730.5	726.5
	1.692	728	731.5	726
	1.693	728	728.5	729
	1.694	728	727.5	727.5
	1.695	731	728.5	726.5
	1.696	732	729	726.5
	1.697	731.5	727.5	725.5
	1.698	726	728	725
	1.699	728	726.5	727.5
	1.7	730.5	726	728.5
	1.701	728.5	726	727.5
	1.702	729	727	726
	1.703	731.5	727	725.5
	1.704	728	728.5	729
	1.705	729	728	728
	1.706	726.5	728.5	728
	1.707	732	728	728.5
	1.708	729	728.5	729
	1.709	728.5	728.5	725
	1.71	728	727	729
	1.711	725	725	729
	1.712	724	727.5	731.5
	1.713	727	730	731.5
	1.714	728	728	729
	1.715	726	728.5	731.5
	1.716	726.5	729	729
	1.717	726	731	732
	1.718	725	729	731.5
	1.719	724	728	729
	1.72	726	728.5	731.5
	1.721	725.5	731	729
	1.722	725.5	728.5	731
	1.723	731	731.5	728
	1.724	724.5	729	728.5
	1.725	726.5	727.5	732.5
	1.726	725	729.5	729
	1.727	725	731	730.5
	1.728	724	731.5	728.5
	1.729	726	729	729
	1.73	727	729	729
	1.731	724	731.5	730
	1.732	726.5	726.5	729
	1.733	719.5	725	732.5
	1.734	724.5	727.5	734
	1.735	725	726.5	729
	1.736	724	731.5	728
	1.737	724	725.5	731.5
	1.738	722	726.5	729
	1.739	723.5	728.5	729
	1.74	722	727.5	731
	1.741	721.5	731	731
	1.742	721.5	728.5	729
	1.743	720	726.5	732.5
	1.744	719	725	730
	1.745	722.5	728	729
	1.746	720.5	725.5	730.5
	1.747	718.5	728	727
	1.748	721	731.5	730
	1.749	718	728	729
	1.75	718.5	729	729
	1.751	719.5	730	730
	1.752	719.5	728	729
	1.753	720	724.5	730
	1.754	721.5	727.5	731.5
	1.755	720.5	725.5	730.5
	1.756	720.5	725.5	726.5
	1.757	720	728	728.5
	1.758	719.5	727.5	729
	1.759	720	726	729
	1.76	720.5	725.5	729
	1.761	717	729	730.5
	1.762	719	726	727.5
	1.763	720	727	732
	1.764	722	728	727.5
	1.765	722.5	727	728.5
	1.766	719.5	727	731
	1.767	718	727	731.5
	1.768	722.5	725	727.5
	1.769	721.5	726.5	729
	1.77	720.5	726	731
	1.771	723.5	726.5	729
	1.772	721	728	729
	1.773	718.5	728	730
	1.774	719	728	731.5
	1.775	719.5	724	729
	1.776	720.5	725	727.5
	1.777	723	728	729
	1.778	723	730.5	728
	1.779	719.5	727	729
	1.78	725.5	726.5	730
	1.781	720.5	728	730.5
	1.782	722	727.5	731.5
	1.783	724.5	727	730
	1.784	724.5	727	728.5
	1.785	721.5	729	731
	1.786	721	725.5	728.5
	1.787	724.5	726.5	726.5
	1.788	724	728.5	726.5
	1.789	726	726	730.5
	1.79	724	727	731.5
	1.791	722	728.5	730.5
	1.792	726	725	729
	1.793	725.5	730.5	732.5
	1.794	724	725.5	733.5
	1.795	725	724.5	729
	1.796	723.5	725	732.5
	1.797	726	728	735
	1.798	724	727	729
	1.799	725	732.5	734
	1.8	723.5	731	730.5
	1.801	725	727.5	731.5
	1.802	725.5	730.5	731.5
	1.803	725	730	732
	1.804	724	729	733.5
	1.805	725	732	731.5
	1.806	723.5	727.5	735.5
	1.807	727.5	725.5	732.5
	1.808	724.5	727	731.5
	1.809	724.5	725.5	734.5
	1.81	724	727.5	734
	1.811	725	728.5	734.5
	1.812	723.5	731.5	732
	1.813	724.5	728.5	731.5
	1.814	725	729	734.5
	1.815	724	729	731.5
	1.816	723	729	736.5
	1.817	721.5	729	731.5
	1.818	723.5	728	731
	1.819	724.5	727.5	731.5
	1.82	726	729	734
	1.821	726.5	728	733.5
	1.822	725	729	729
	1.823	724	732	732.5
	1.824	724.5	728	731.5
	1.825	722.5	731.5	734
	1.826	727.5	727	734.5
	1.827	723.5	730	731.5
	1.828	728	729	733.5
	1.829	725	731.5	731.5
	1.83	725	731.5	729
	1.831	722.5	729	733
	1.832	723	733.5	728.5
	1.833	723.5	729	729
	1.834	723	727.5	731.5
	1.835	721.5	731.5	726
	1.836	726.5	730.5	729
	1.837	726	731	726.5
	1.838	724.5	730.5	730.5
	1.839	726	729	731.5
	1.84	724.5	733	726.5
	1.841	724.5	731	729
	1.842	725	732.5	729
	1.843	724	733	729
	1.844	725	732	729
	1.845	725.5	731	726.5
	1.846	725.5	732.5	728
	1.847	726	734.5	728.5
	1.848	724.5	736	728.5
	1.849	724.5	734.5	725
	1.85	726	729	726
	1.851	725	731.5	728
	1.852	728.5	734	724
	1.853	727	734.5	726
	1.854	729	733	725.5
	1.855	727.5	735	725
	1.856	723.5	734.5	723
	1.857	727	734.5	724
	1.858	729	733.5	722.5
	1.859	728	738.5	724.5
	1.86	726	737.5	725
	1.861	729	734.5	725
	1.862	729	736	726
	1.863	725	734.5	725
	1.864	729	735.5	723.5
	1.865	727	740	723.5
	1.866	726.5	736.5	722.5
	1.867	727.5	735.5	725
	1.868	727	738	726
	1.869	731.5	740	725
	1.87	728	735.5	721.5
	1.871	731	738	724.5
	1.872	725.5	738.5	723.5
	1.873	728.5	735	724
	1.874	728	736.5	724.5
	1.875	731.5	738.5	725.5
	1.876	729	737.5	724.5
	1.877	727.5	738.5	723
	1.878	732	737	724.5
	1.879	731.5	738.5	722.5
	1.88	728.5	738.5	725
	1.881	731	739.5	726
	1.882	730.5	739	724
	1.883	732	739	725
	1.884	729	737.5	726.5
	1.885	728	738	724.5
	1.886	730	737	723
	1.887	731	738	725
	1.888	731.5	738.5	724
	1.889	731.5	736.5	725
	1.89	734	742.5	725
	1.891	727.5	737.5	725
	1.892	731	736.5	725
	1.893	729	740	726.5
	1.894	729	739.5	726.5
	1.895	728.5	738	727
	1.896	729	738	727
	1.897	727	739	727.5
	1.898	733	740.5	723
	1.899	729	739	725.5
	1.9	728.5	739	725.5
	1.901	729	739.5	730.5
	1.902	724.5	739	730
	1.903	727.5	743	729
	1.904	728	736	730.5
	1.905	731	741	728.5
	1.906	731	738.5	729
	1.907	725.5	738.5	730.5
	1.908	728.5	739.5	731.5
	1.909	730	738.5	733.5
	1.91	728	739	732.5
	1.911	729	738	731.5
	1.912	727.5	739	733
	1.913	729	741	733.5
	1.914	726	738	736
	1.915	729	735.5	734
	1.916	726.5	738.5	732.5
	1.917	725	735.5	731.5
	1.918	725.5	735.5	732
	1.919	727	735.5	734.5
	1.92	729	736	731.5
	1.921	731	734.5	734
	1.922	729	737	733.5
	1.923	729	737	736.5
	1.924	727.5	733	738
	1.925	729	731.5	735.5
	1.926	725	733	736
	1.927	730	730.5	735
	1.928	727.5	732	734
	1.929	726.5	729	732.5
	1.93	726.5	732	735.5
	1.931	727.5	733	731.5
	1.932	727.5	731	734.5
	1.933	727	730.5	734.5
	1.934	729	731	735.5
	1.935	726.5	729	735
	1.936	730.5	729	738
	1.937	727.5	727	732.5
	1.938	728	729	736.5
	1.939	729	729	734.5
	1.94	725.5	725	734.5
	1.941	726	726.5	735.5
	1.942	728.5	727.5	736.5
	1.943	730.5	727	733.5
	1.944	729	726	731.5
	1.945	730	729	735.5
	1.946	726.5	728	733.5
	1.947	725	725	732.5
	1.948	727	725.5	733.5
	1.949	731.5	727	734
	1.95	731.5	723.5	731.5
	1.951	725.5	725	733
	1.952	729	723	730.5
	1.953	730	719.5	729
	1.954	727.5	721	731.5
	1.955	727.5	725.5	731
	1.956	727.5	722	732.5
	1.957	731.5	719	731.5
	1.958	731.5	722	732.5
	1.959	728	721	731.5
	1.96	727	719	732.5
	1.961	729	717.5	728.5
	1.962	728.5	718	731.5
	1.963	727.5	719.5	731
	1.964	731.5	717.5	730.5
	1.965	729	714	729
	1.966	727	715	729
	1.967	729	714.5	731.5
	1.968	729	712.5	731.5
	1.969	730	711	731.5
	1.97	731	712.5	732
	1.971	728.5	711	728
	1.972	729	709	726
	1.973	731.5	709	731.5
	1.974	727	709	727
	1.975	729	705.5	729
	1.976	729	704.5	729
	1.977	729	704.5	728.5
	1.978	725.5	706	731.5
	1.979	726	701	726
	1.98	726	700	730.5
	1.981	729	705.5	728
	1.982	726.5	701.5	722
	1.983	727	699	726.5
	1.984	730.5	698.5	729
	1.985	728	697.5	729
	1.986	725	697.5	729
	1.987	728	694	726
	1.988	731	693	723.5
	1.989	725.5	692.5	731
	1.99	727	686.5	729
	1.991	723	687.5	725
	1.992	725	688.5	727
	1.993	725	689.5	729
[truncated: 6,006 more rows]

## Sheet: C
DataTypeVer2.0	Time	Fz	Fz	Fz
NumberOfData		8000	8000	8000
PreTriggerData		0	0	0
SamplingTime[ms]		1	1	1
DataLabel		D1:CMJ	D2:CMJ	D3:CMJ
DataUnit	sec	N	N	N
	0	705.5	699	704.5
	0.001	708	698	710.5
	0.002	702	698.5	709.5
	0.003	705	697.5	707
	0.004	703.5	698	707.5
	0.005	705	698.5	706
	0.006	704.5	702	707
	0.007	703.5	701	710.5
	0.008	702	698	707
	0.009	705.5	700	705.5
	0.01	704.5	699.5	708.5
	0.011	705	699.5	702.5
	0.012	706.5	697	707
	0.013	706.5	700	705
	0.014	704	700	704
	0.015	705	698.5	704.5
	0.016	703.5	698.5	704.5
	0.017	705	697.5	708
	0.018	704.5	698.5	709
	0.019	703.5	697.5	706
	0.02	709.5	702	708
	0.021	702	698.5	707
	0.022	706	698.5	704.5
	0.023	702.5	703	704
	0.024	704	698.5	706
	0.025	703.5	698.5	705
	0.026	706	701.5	703.5
	0.027	704.5	701	705
	0.028	702.5	700.5	705
	0.029	706	700.5	703.5
	0.03	703	701.5	706.5
	0.031	705	702	705.5
	0.032	705	704.5	701.5
	0.033	706.5	704.5	705
	0.034	698.5	702.5	702
	0.035	703.5	703	704
	0.036	704.5	700	701.5
	0.037	706	699	702.5
	0.038	704.5	703	698.5
	0.039	704.5	703	703.5
	0.04	706	702	699
	0.041	703	696	699.5
	0.042	701.5	700.5	699
	0.043	702.5	702	700.5
	0.044	706.5	705	702
	0.045	704.5	701.5	701
	0.046	703	703.5	702
	0.047	705	700.5	701.5
	0.048	705	702	702.5
	0.049	703.5	703	701.5
	0.05	706	703.5	702.5
	0.051	703	704.5	702
	0.052	705	701	696
	0.053	702.5	704.5	699.5
	0.054	702	702	698.5
	0.055	706.5	702	699
	0.056	705	706.5	702.5
	0.057	703.5	704.5	701.5
	0.058	704.5	705.5	702
	0.059	705.5	705.5	704
	0.06	702	706	701
	0.061	705.5	709	699.5
	0.062	704.5	706	702
	0.063	704.5	706.5	701.5
	0.064	705.5	705.5	701.5
	0.065	704.5	706	701.5
	0.066	703.5	704.5	700.5
	0.067	705	708	703
	0.068	705	706	700
	0.069	707	705	700.5
	0.07	705.5	705.5	701
	0.071	703	706	702.5
	0.072	706	709	702
	0.073	707.5	704.5	701.5
	0.074	707	706	699.5
	0.075	706	706.5	702
	0.076	706.5	707	700
	0.077	708	702.5	704.5
	0.078	709	705.5	700.5
	0.079	703.5	707	702
	0.08	706.5	709	703.5
	0.081	709.5	708	700.5
	0.082	705	707	705.5
	0.083	708	704.5	706.5
	0.084	709.5	703	700.5
	0.085	709	704.5	699.5
	0.086	704.5	704.5	705
	0.087	707	705	703.5
	0.088	705.5	707.5	704
	0.089	707	708	702.5
	0.09	706	704.5	704.5
	0.091	708.5	705.5	703.5
	0.092	706	705.5	704.5
	0.093	708.5	703	706.5
	0.094	705.5	705	706
	0.095	706	704.5	705
	0.096	706	705	706
	0.097	704	705.5	708
	0.098	708.5	705	703.5
	0.099	708	704.5	704.5
	0.1	711	704.5	706.5
	0.101	709.5	699.5	704.5
	0.102	707.5	708	706
	0.103	707	703.5	705
	0.104	709.5	702	705.5
	0.105	708.5	703.5	707
	0.106	708	707	704.5
	0.107	704.5	705	706
	0.108	708	705	703.5
	0.109	710	702.5	707.5
	0.11	708	704.5	704.5
	0.111	705.5	704	707
	0.112	704.5	704.5	707.5
	0.113	709.5	704.5	706
	0.114	705.5	703.5	706.5
	0.115	705	703.5	705
	0.116	705	703.5	704.5
	0.117	709	703	708
	0.118	705	702.5	705.5
	0.119	702.5	701.5	701.5
	0.12	704.5	703.5	705.5
	0.121	703.5	704	706
	0.122	702.5	703.5	704.5
	0.123	701	701.5	705
	0.124	703	701	706
	0.125	703.5	703.5	704.5
	0.126	701.5	701.5	707
	0.127	704.5	705	704.5
	0.128	706	703	705
	0.129	705	703.5	704.5
	0.13	703.5	703.5	707
	0.131	705.5	703.5	704.5
	0.132	703.5	703.5	704
	0.133	702	705.5	704
	0.134	705	701	706
	0.135	699.5	703	704
	0.136	704	700	704.5
	0.137	704.5	701.5	702
	0.138	706.5	705	706.5
	0.139	704	700	701
	0.14	703.5	702	703.5
	0.141	704.5	704	704.5
	0.142	704.5	705	704.5
	0.143	701	700	703.5
	0.144	704.5	703.5	703
	0.145	702	703.5	705
	0.146	704.5	701.5	704
	0.147	705	701	700
	0.148	704	699.5	702
	0.149	702.5	701	700.5
	0.15	701	700.5	697.5
	0.151	701.5	702.5	699.5
	0.152	704	702	701.5
	0.153	705.5	703.5	706.5
	0.154	704.5	700	701.5
	0.155	704.5	704	702
	0.156	702	704	702
	0.157	702.5	704.5	700.5
	0.158	703.5	703.5	701.5
	0.159	703.5	703.5	704
	0.16	699	705.5	699.5
	0.161	706	700.5	702
	0.162	704.5	702	704.5
	0.163	704.5	702	704.5
	0.164	706	697.5	702.5
	0.165	706	702.5	701
	0.166	699	700	704
	0.167	704	704	702.5
	0.168	703	703	705.5
	0.169	701.5	702	701.5
	0.17	701.5	700.5	704.5
	0.171	704.5	700.5	704.5
	0.172	707	701.5	700.5
	0.173	703.5	700.5	700.5
	0.174	705.5	700	702
	0.175	707	701.5	705
	0.176	705	701.5	702
	0.177	704	701.5	704.5
	0.178	706.5	705	701.5
	0.179	704	702	701.5
	0.18	705.5	704	699.5
	0.181	707	703.5	704.5
	0.182	707.5	701.5	704.5
	0.183	707	703.5	703
	0.184	705.5	702	703
	0.185	705.5	702	705
	0.186	705.5	702.5	700.5
	0.187	707	701.5	705.5
	0.188	707	702.5	700.5
	0.189	707	702.5	701
	0.19	703	701.5	703
	0.191	706.5	701.5	703.5
	0.192	705	700.5	702.5
	0.193	704.5	704.5	706
	0.194	706.5	704	704.5
	0.195	705.5	701.5	700.5
	0.196	704.5	704.5	702.5
	0.197	708	706	703
	0.198	708.5	701	704.5
	0.199	707	701.5	706
	0.2	705	707	702
	0.201	704.5	704.5	705
	0.202	708	702	701.5
	0.203	709	704	705.5
	0.204	704.5	703.5	701.5
	0.205	705	704	701.5
	0.206	704	701.5	704.5
	0.207	703	703.5	707
	0.208	709	701	706
	0.209	706	701.5	704.5
	0.21	707	704	705
	0.211	705.5	703.5	703.5
	0.212	704.5	702.5	708.5
	0.213	701	701	706
	0.214	706	704.5	706.5
	0.215	706.5	705	707.5
	0.216	705	704.5	702
	0.217	705.5	703.5	704.5
	0.218	706.5	704.5	704.5
	0.219	706	700.5	699
	0.22	704.5	703.5	703.5
	0.221	702.5	706	706.5
	0.222	705	704	702.5
	0.223	704.5	701.5	701.5
	0.224	703.5	703	705
	0.225	704.5	704.5	706
	0.226	706.5	703.5	702
	0.227	702	704.5	700
	0.228	706	703	705
	0.229	706	703	705.5
	0.23	705.5	703.5	706
	0.231	704	702	702.5
	0.232	704.5	704.5	700.5
	0.233	703	705	704.5
	0.234	703	706.5	703.5
	0.235	705	704.5	703
	0.236	704.5	702.5	702.5
	0.237	704.5	704.5	702.5
	0.238	705	706.5	703.5
	0.239	709	704.5	700.5
	0.24	701.5	703	704.5
	0.241	705.5	705.5	700
	0.242	705.5	704.5	699.5
	0.243	705	701	702
	0.244	703	703.5	703.5
	0.245	703	703	702.5
	0.246	702	704.5	702
	0.247	708	706.5	704.5
	0.248	703.5	706	704.5
	0.249	705	704.5	699.5
	0.25	705.5	704.5	704.5
	0.251	704.5	703.5	703.5
	0.252	704.5	702	702.5
	0.253	708	704.5	701
	0.254	705	705	703.5
	0.255	703.5	706	703
	0.256	707	704	698.5
	0.257	708.5	702.5	703
	0.258	704.5	703.5	704
	0.259	703	705.5	703
	0.26	704.5	706.5	702.5
	0.261	703.5	705.5	704.5
	0.262	707.5	703.5	703
	0.263	706.5	706.5	698.5
	0.264	703.5	702.5	706.5
	0.265	703.5	702	701.5
	0.266	705.5	701	701
	0.267	705	704.5	701.5
	0.268	705	704.5	702.5
	0.269	704.5	704.5	697
	0.27	706	705	701.5
	0.271	701.5	707	703
	0.272	704	706.5	701
	0.273	707	704	700.5
	0.274	704	705	699.5
	0.275	703	705	700.5
	0.276	705	705	704.5
	0.277	703.5	702	701.5
	0.278	706	704.5	703
	0.279	703.5	707	704.5
	0.28	704.5	703	701
	0.281	705	704	703
	0.282	703.5	704.5	701
	0.283	708	705.5	701.5
	0.284	702.5	703.5	708
	0.285	704.5	704	701
	0.286	701	703	703
	0.287	702.5	703	703.5
	0.288	701	707	699.5
	0.289	705	705.5	704
	0.29	701	707	704.5
	0.291	703.5	706	702
	0.292	702.5	706.5	704
	0.293	701.5	702.5	699.5
	0.294	704.5	703	705
	0.295	702.5	702.5	702
	0.296	704.5	699	700
	0.297	704.5	704.5	704.5
	0.298	698.5	704	706
	0.299	703.5	703.5	704
	0.3	705	703	703.5
	0.301	701.5	704.5	705.5
	0.302	703	705	703
	0.303	703.5	701.5	701.5
	0.304	703.5	705.5	702.5
	0.305	702.5	703	705.5
	0.306	701	703.5	702.5
	0.307	705	707.5	705
	0.308	701	703.5	702.5
	0.309	706.5	705	703
	0.31	701	704.5	702
	0.311	704.5	704	704
	0.312	703.5	704.5	702.5
	0.313	704.5	705.5	702
	0.314	704.5	707	702.5
	0.315	705.5	704.5	699
	0.316	707	709.5	703.5
	0.317	701.5	708	704
	0.318	703.5	704	702.5
	0.319	704.5	707	702.5
	0.32	703	702.5	701
	0.321	704.5	705.5	705
	0.322	704.5	705	706
	0.323	704.5	705	706.5
	0.324	704	707.5	704
	0.325	701	706.5	702.5
	0.326	704	704.5	704.5
	0.327	705	706	705
	0.328	701	705.5	706.5
	0.329	701	702	704.5
	0.33	704	708	701
	0.331	704	709	701.5
	0.332	701.5	707	702.5
	0.333	703.5	708.5	704.5
	0.334	703	705.5	704
	0.335	704.5	704	707
	0.336	706	706.5	701.5
	0.337	700.5	708	706
	0.338	700	705	703
	0.339	702	704.5	701.5
	0.34	700.5	706.5	707
	0.341	703.5	705	702
	0.342	698	706	703.5
	0.343	700.5	705.5	700
	0.344	701	706	700.5
	0.345	703.5	708	704.5
	0.346	701.5	708.5	704.5
	0.347	703	706.5	702.5
	0.348	699.5	708.5	703.5
	0.349	700	705	702.5
	0.35	700.5	706	703.5
	0.351	699.5	703	703
	0.352	705	705.5	704.5
	0.353	702	708	703.5
	0.354	699.5	704	705
	0.355	702.5	706.5	704.5
	0.356	699	708.5	701
	0.357	699.5	705.5	703.5
	0.358	702	707.5	701
	0.359	696	707	705.5
	0.36	703.5	705	701.5
	0.361	703.5	705	704.5
	0.362	699.5	707	701.5
	0.363	700	705	704.5
	0.364	699.5	703.5	699
	0.365	699	707	701.5
	0.366	700.5	706.5	702
	0.367	697.5	705.5	705.5
	0.368	698.5	708	704
	0.369	701.5	704.5	702
	0.37	702.5	707.5	700.5
	0.371	700.5	705.5	701
	0.372	702.5	705	703.5
	0.373	702.5	707	703
	0.374	699.5	707	701.5
	0.375	703	703	703
	0.376	702	705.5	703.5
	0.377	704.5	704.5	701
	0.378	702.5	703	702.5
	0.379	702.5	707	701
	0.38	702.5	703.5	701.5
	0.381	698.5	703.5	702.5
	0.382	702	703.5	702.5
	0.383	702	701.5	705
	0.384	703.5	702	698
	0.385	699.5	702	701
	0.386	702.5	704.5	698
	0.387	703.5	706	700.5
	0.388	700.5	704	699.5
	0.389	704.5	704	699
	0.39	704	705	700
	0.391	703.5	703.5	701.5
	0.392	704.5	703.5	700.5
	0.393	706	704.5	700.5
	0.394	703	705	698.5
	0.395	704	704.5	702.5
	0.396	704	705.5	699.5
	0.397	700.5	703.5	702
	0.398	703.5	701	704.5
	0.399	706	703.5	699.5
	0.4	705	700	701
	0.401	706.5	703.5	701.5
	0.402	703.5	703	700
	0.403	703.5	706	700.5
	0.404	700.5	699.5	700
	0.405	705.5	702.5	697.5
	0.406	701.5	700.5	700
	0.407	708.5	697.5	699.5
	0.408	704.5	703	698.5
	0.409	705	700.5	701.5
	0.41	704.5	701.5	701.5
	0.411	704.5	702.5	700
	0.412	704	697	699.5
	0.413	703.5	701	697.5
	0.414	705.5	703	702
	0.415	706	699.5	702
	0.416	702.5	698.5	699.5
	0.417	707	701.5	701.5
	0.418	704.5	700	701.5
	0.419	708.5	704	701.5
	0.42	703	703	701.5
	0.421	700.5	703.5	700
	0.422	704.5	703	701.5
	0.423	705	704.5	703
	0.424	704.5	699	701
	0.425	704	698.5	702.5
	0.426	708.5	701.5	703
	0.427	704.5	700.5	700
	0.428	706	703.5	700.5
	0.429	702.5	701.5	705
	0.43	707.5	699.5	700
	0.431	704.5	700.5	698.5
	0.432	704	698	704.5
	0.433	705	699.5	702
	0.434	705	704	701.5
	0.435	704	697.5	703
	0.436	704.5	703	701.5
	0.437	704	701	704.5
	0.438	705	702	703.5
	0.439	705	698.5	702.5
	0.44	704.5	702	701
	0.441	705	701	701.5
	0.442	705	703	699.5
	0.443	702.5	704	702
	0.444	700.5	698.5	702
	0.445	702.5	703	704
	0.446	706	702.5	699
	0.447	704.5	701	702
	0.448	705	698.5	701
	0.449	704.5	702	699.5
	0.45	704.5	703	702.5
	0.451	706	701	701.5
	0.452	702.5	702	698.5
	0.453	704.5	701.5	701.5
	0.454	702.5	702	704.5
	0.455	704.5	704.5	702
	0.456	703.5	701	701
	0.457	701.5	703	703
	0.458	706.5	700.5	700.5
	0.459	701	701.5	704.5
	0.46	704.5	703.5	701.5
	0.461	704	702.5	704.5
	0.462	705	703.5	700
	0.463	703.5	700.5	703.5
	0.464	701	702	700
	0.465	702	703.5	702.5
	0.466	700.5	702	702.5
	0.467	703	700.5	703.5
	0.468	702	703	701.5
	0.469	699.5	702	699.5
	0.47	703	704	702.5
	0.471	701.5	703.5	701.5
	0.472	703.5	702.5	704.5
	0.473	704.5	706	701.5
	0.474	703	704.5	703.5
	0.475	701	704	701.5
	0.476	703.5	706.5	704.5
	0.477	703.5	704	700.5
	0.478	699.5	704	702.5
	0.479	700.5	705	702.5
	0.48	704.5	701	702
	0.481	704	704.5	708
	0.482	700	700.5	703.5
	0.483	700.5	702	704
	0.484	700.5	700.5	702.5
	0.485	706	704.5	705.5
	0.486	701.5	703.5	704.5
	0.487	706	701.5	701.5
	0.488	703	701	703.5
	0.489	705	704.5	704.5
	0.49	702.5	700	705
	0.491	701	705.5	702
	0.492	701	703.5	703
	0.493	704.5	702	704.5
	0.494	702	702	704
	0.495	703	702	705
	0.496	704.5	699.5	701.5
	0.497	703.5	702.5	704.5
	0.498	704.5	702	702.5
	0.499	700.5	702	705.5
	0.5	706	703.5	704.5
	0.501	702	703.5	703.5
	0.502	701.5	701	701
	0.503	705	703	703.5
	0.504	703	696	702
	0.505	706.5	704.5	703
	0.506	703.5	697.5	705
	0.507	705.5	704.5	702
	0.508	705.5	699	701.5
	0.509	704.5	698	706
	0.51	706.5	703	701
	0.511	705	699.5	704.5
	0.512	707	698	704
	0.513	706	701	704.5
	0.514	705.5	697.5	703.5
	0.515	705	696	702.5
	0.516	707.5	700.5	700.5
	0.517	707	697.5	703
	0.518	704.5	699	703
	0.519	705	701	703
	0.52	705	697.5	702.5
	0.521	706	700	702.5
	0.522	704	697.5	700
	0.523	706.5	698	704
	0.524	708	698.5	700.5
	0.525	704.5	696	702.5
	0.526	705.5	698	704.5
	0.527	704.5	699	699.5
	0.528	707	697.5	704.5
	0.529	705.5	699.5	701.5
	0.53	703	696	702
	0.531	705.5	697.5	701.5
	0.532	706	696	701
	0.533	704.5	696	704.5
	0.534	706	698.5	699
	0.535	705	697.5	700.5
	0.536	708	694.5	702.5
	0.537	704.5	694.5	701
	0.538	705.5	698	703
	0.539	707	696.5	698
	0.54	707	694	701
	0.541	703	695.5	701
	0.542	705.5	695.5	702.5
	0.543	706.5	695	704.5
	0.544	707	698.5	699
	0.545	706.5	697.5	703
	0.546	707	695	704
	0.547	703.5	697.5	704.5
	0.548	704.5	698.5	700.5
	0.549	706.5	698.5	701
	0.55	703.5	698	701.5
	0.551	708.5	694.5	702.5
	0.552	704.5	694	706
	0.553	701.5	696	701.5
	0.554	701	698	702.5
	0.555	702	698.5	705
	0.556	705	701	701.5
	0.557	703	695.5	704.5
	0.558	705.5	696	702
	0.559	701.5	696	704
	0.56	701.5	700.5	699.5
	0.561	703	695	706.5
	0.562	701	699	706
	0.563	701	697.5	702
	0.564	707	693.5	702.5
	0.565	705	699.5	706
	0.566	702.5	700	701
	0.567	702.5	694	704
	0.568	701	698	703
	0.569	703.5	699.5	701
	0.57	699.5	696	701.5
	0.571	702	696	702.5
	0.572	702	700	704
	0.573	698.5	701.5	703.5
	0.574	704.5	702	700
	0.575	700	699.5	701.5
	0.576	704	701.5	702
	0.577	701	699	703.5
	0.578	702	697.5	703.5
	0.579	705.5	699.5	702
	0.58	703.5	701	705
	0.581	701	700.5	702.5
	0.582	704.5	699.5	703
	0.583	700.5	701	699.5
	0.584	701.5	699.5	703.5
	0.585	703	705.5	702
	0.586	699.5	702	704
	0.587	700	704.5	703.5
	0.588	704.5	704.5	703.5
	0.589	704.5	704.5	702.5
	0.59	699	701	701.5
	0.591	701	703	701
	0.592	699.5	701.5	707
	0.593	704.5	705	704
	0.594	701	700.5	702.5
	0.595	704.5	703	703
	0.596	703.5	701.5	706
	0.597	703	704.5	701.5
	0.598	702	701.5	704.5
	0.599	701.5	700.5	702
	0.6	702.5	703	703
	0.601	703	704	705.5
	0.602	702	701.5	703
	0.603	700	702	702
	0.604	705	704.5	702
	0.605	702	703.5	701.5
	0.606	702	701.5	704
	0.607	704	701	703.5
	0.608	704	700	701.5
	0.609	706	701.5	704.5
	0.61	704.5	701.5	700
	0.611	706	702	700
	0.612	705.5	702.5	700
	0.613	704.5	701	701
	0.614	706.5	705.5	704.5
	0.615	706.5	703.5	704.5
	0.616	704.5	699.5	700.5
	0.617	703.5	702.5	701
	0.618	705	702.5	699.5
	0.619	705	699.5	703
	0.62	704	704	699.5
	0.621	706	704	702
	0.622	709	703.5	703.5
	0.623	704.5	703	704.5
	0.624	706.5	698.5	701
	0.625	706.5	700.5	701.5
	0.626	705.5	697.5	703.5
	0.627	704	701	702.5
	0.628	704.5	700	699.5
	0.629	705.5	705	704.5
	0.63	704.5	704.5	705
	0.631	704	703	702
	0.632	707	701	701
	0.633	705	700.5	701.5
	0.634	707	704.5	700.5
	0.635	705.5	703.5	701
	0.636	704	703	702.5
	0.637	705	703	699.5
	0.638	704.5	703	701
	0.639	706	703.5	703.5
	0.64	707	701.5	701.5
	0.641	707	705	703.5
	0.642	704	704.5	704.5
	0.643	703	702.5	701.5
	0.644	705	705	703
	0.645	705	703.5	702.5
	0.646	704.5	700.5	704.5
	0.647	707	704.5	698
	0.648	704.5	700.5	702
	0.649	701.5	703.5	703.5
	0.65	703.5	707	703.5
	0.651	706.5	704.5	702.5
	0.652	705	704	703
	0.653	704	704.5	704.5
	0.654	704.5	702.5	703.5
	0.655	706.5	705	696
	0.656	704	705.5	700.5
	0.657	705.5	701	703.5
	0.658	700.5	703.5	704.5
	0.659	707	707	701
	0.66	705	702.5	705
	0.661	706	702	703.5
	0.662	706	705.5	703.5
	0.663	707	700.5	700.5
	0.664	707.5	704.5	700.5
	0.665	707	704.5	705
	0.666	704.5	707	704
	0.667	708.5	706.5	705
	0.668	705.5	705.5	701.5
	0.669	705.5	704	703
	0.67	703.5	703.5	706
	0.671	706.5	704.5	700
	0.672	705.5	704	704.5
	0.673	706	706	703
	0.674	705.5	705	701
	0.675	703.5	707.5	702
	0.676	707	703.5	698
	0.677	705.5	704.5	705
	0.678	707	706.5	701.5
	0.679	704.5	704.5	703.5
	0.68	703	708.5	700
	0.681	705	704.5	701
	0.682	706	710.5	706
	0.683	701	704.5	702
	0.684	705.5	704.5	702
	0.685	705	710	704.5
	0.686	707	708	702.5
	0.687	703.5	707	702.5
	0.688	704.5	705	703.5
	0.689	705	704.5	705
	0.69	707.5	706	702
	0.691	703.5	706	704.5
	0.692	706	706	700.5
	0.693	707	706	702.5
	0.694	707.5	708	704.5
	0.695	707	705.5	703.5
	0.696	705.5	703.5	701
	0.697	703.5	705	702.5
	0.698	706.5	704.5	701.5
	0.699	706	707	702.5
	0.7	707	709.5	704.5
	0.701	707	711	705.5
	0.702	703	708	705.5
	0.703	705.5	705	702.5
	0.704	703	709.5	703
	0.705	704.5	704	699.5
	0.706	704	706.5	701.5
	0.707	706	702.5	704.5
	0.708	704.5	704.5	700
	0.709	704.5	704.5	701.5
	0.71	708	707	702.5
	0.711	704.5	704	700
	0.712	707	704.5	704.5
	0.713	704.5	705	702.5
	0.714	704.5	705	702.5
	0.715	706.5	704.5	699
	0.716	706	705	702.5
	0.717	706	708	701
	0.718	702.5	703.5	702
	0.719	708	704	702
	0.72	707	706	704.5
	0.721	706	703	699.5
	0.722	705.5	705	700
	0.723	706.5	704	702
	0.724	705.5	703.5	702
	0.725	704.5	705	700.5
	0.726	704.5	703	698
	0.727	704	703.5	701
	0.728	704.5	705.5	700.5
	0.729	704.5	700	701
	0.73	705	704	703
	0.731	705	697.5	702
	0.732	709	704.5	698.5
	0.733	708.5	703.5	700.5
	0.734	706.5	704.5	702.5
	0.735	704.5	702.5	704.5
	0.736	708.5	703.5	702.5
	0.737	703.5	704.5	703.5
	0.738	705	705.5	704
	0.739	702	703	703.5
	0.74	706	702	702.5
	0.741	708	701.5	702.5
	0.742	705	704	704.5
	0.743	708	702	704.5
	0.744	703.5	703	702.5
	0.745	705	704.5	700.5
	0.746	706.5	701.5	704
	0.747	704	701	703.5
	0.748	704.5	701	703.5
	0.749	703.5	699	700
	0.75	707	702.5	701
	0.751	704.5	700.5	702.5
	0.752	705	700.5	704.5
	0.753	705.5	701	702.5
	0.754	704	699	701
	0.755	707.5	702	704.5
	0.756	704.5	701	705
	0.757	705	703.5	702
	0.758	706.5	699	700.5
	0.759	705.5	703	698
	0.76	703.5	703	703.5
	0.761	703	702	703.5
	0.762	706.5	702	697.5
	0.763	705.5	700	701
	0.764	703.5	703	700.5
	0.765	703	703.5	703.5
	0.766	704.5	702	699.5
	0.767	702	706	707.5
	0.768	704	702	703.5
	0.769	704.5	705.5	701
	0.77	706	703	702.5
	0.771	704	702	705
	0.772	705	707	706
	0.773	703.5	703.5	703
	0.774	705.5	704.5	704
	0.775	703.5	705.5	704
	0.776	703.5	704	702
	0.777	704	703.5	706.5
	0.778	700.5	705.5	702
	0.779	701.5	701	700
	0.78	705	703.5	704.5
	0.781	704.5	703.5	699
	0.782	702.5	705.5	703.5
	0.783	703	706	704.5
	0.784	705	704.5	703.5
	0.785	704.5	703	703.5
	0.786	703.5	703.5	703.5
	0.787	704.5	705	707.5
	0.788	704.5	704.5	705
	0.789	702	705.5	705.5
	0.79	704.5	704.5	704.5
	0.791	703.5	704	703.5
	0.792	703.5	704	705.5
	0.793	704.5	703.5	700.5
	0.794	704.5	707	704
	0.795	704.5	704.5	700.5
	0.796	703	705	700
	0.797	704	706	703.5
	0.798	705	703	702
	0.799	704	707	702
	0.8	705	705	704.5
	0.801	700.5	705	700.5
	0.802	703	703.5	700.5
	0.803	700.5	707	705.5
	0.804	702	708.5	700
	0.805	701.5	708.5	702.5
	0.806	704	703.5	704.5
	0.807	704.5	707	703
	0.808	702.5	704	705.5
	0.809	704	704.5	704
	0.81	702.5	705.5	701.5
	0.811	701	701.5	705.5
	0.812	701.5	704.5	702
	0.813	704	706	703
	0.814	704	706	703.5
	0.815	703	705	701.5
	0.816	703.5	707	706.5
	0.817	703.5	706	702.5
	0.818	700.5	703.5	703.5
	0.819	704.5	706.5	702
	0.82	704.5	706.5	704.5
	0.821	702.5	704.5	704
	0.822	705	704.5	705.5
	0.823	705	707.5	702
	0.824	701.5	704.5	704.5
	0.825	706.5	707.5	707
	0.826	705.5	706	706
	0.827	701	707.5	702.5
	0.828	704.5	707	706
	0.829	702	706	705
	0.83	702.5	704.5	705
	0.831	704.5	704	706
	0.832	705	705	705
	0.833	701	709	707.5
	0.834	703.5	704.5	703.5
	0.835	702.5	706	703
	0.836	703	704.5	706
	0.837	705.5	705.5	705.5
	0.838	704.5	703	710.5
	0.839	705.5	702.5	706
	0.84	704.5	706	704
	0.841	706	703.5	704
	0.842	704.5	701.5	705
	0.843	705.5	703.5	705
	0.844	703.5	704.5	703.5
	0.845	704.5	703	702.5
	0.846	704	704	703.5
	0.847	704.5	703.5	703
	0.848	703	705	703.5
	0.849	706	706.5	703.5
	0.85	706.5	705.5	704
	0.851	706	704	701
	0.852	701.5	702	701.5
	0.853	708.5	705	703.5
	0.854	704.5	701.5	701.5
	0.855	708.5	701	701
	0.856	705	704.5	701.5
	0.857	706.5	701	701
	0.858	706	702	702
	0.859	704.5	704.5	701.5
	0.86	709	703	703.5
	0.861	704.5	704.5	703
	0.862	704.5	703.5	703.5
	0.863	707	701	702.5
	0.864	706	701.5	704
	0.865	702.5	704	703.5
	0.866	704	701.5	703.5
	0.867	706	703	704.5
	0.868	708	704	703
	0.869	709	700	701.5
	0.87	708	702.5	699.5
	0.871	706.5	703.5	702
	0.872	705	703	703
	0.873	706.5	703.5	702
	0.874	704	703.5	701
	0.875	707.5	703	701.5
	0.876	704.5	703.5	701.5
	0.877	703.5	702.5	703.5
	0.878	708.5	705.5	703.5
	0.879	704.5	701	701.5
	0.88	707.5	703	700
	0.881	705	703.5	701
	0.882	704.5	700	699
	0.883	706.5	702.5	700.5
	0.884	711	704	701.5
	0.885	706	699.5	701.5
	0.886	707.5	702	700.5
	0.887	703.5	704.5	702
	0.888	706	704.5	701.5
	0.889	708.5	701.5	698
	0.89	706	704.5	701.5
	0.891	706.5	702.5	700.5
	0.892	704.5	702.5	698
	0.893	707.5	703	701.5
	0.894	705.5	702.5	700
	0.895	707	701	701
	0.896	709.5	701	703.5
	0.897	706	701	702
	0.898	706.5	700.5	701
	0.899	710	701	701.5
	0.9	709	701.5	702.5
	0.901	707.5	704	703
	0.902	705.5	698.5	701.5
	0.903	710	700.5	699.5
	0.904	709.5	700.5	699
	0.905	704.5	699.5	700
	0.906	709	703	699.5
	0.907	706.5	699.5	698.5
	0.908	705.5	701.5	703.5
	0.909	709	702.5	701.5
	0.91	706.5	701.5	703.5
	0.911	706.5	704.5	702.5
	0.912	704.5	703	703.5
	0.913	707.5	701.5	699
	0.914	704	703.5	700.5
	0.915	707.5	704.5	701
	0.916	705.5	703	696
	0.917	707.5	701	698.5
	0.918	705	704	700.5
	0.919	704.5	703.5	700.5
	0.92	704.5	701	701.5
	0.921	702.5	702	703.5
	0.922	703.5	703	699
	0.923	706	700.5	697.5
	0.924	702.5	705	700
	0.925	705	704.5	699.5
	0.926	706	703.5	700.5
	0.927	704.5	701.5	700
	0.928	702.5	702.5	700.5
	0.929	702.5	704	702
	0.93	704.5	701.5	702
	0.931	703	703	702
	0.932	703.5	704.5	703
	0.933	705.5	703.5	700.5
	0.934	702.5	705.5	699.5
	0.935	703.5	704	700.5
	0.936	702.5	703.5	703.5
	0.937	703	705.5	704
	0.938	705	701.5	701
	0.939	701.5	700	704.5
	0.94	706	704	700.5
	0.941	702.5	702.5	705
	0.942	702.5	706.5	703
	0.943	702	705.5	702
	0.944	705.5	699.5	701.5
	0.945	702	706	703.5
	0.946	702.5	705	702.5
	0.947	702.5	704	704
	0.948	701	703.5	698.5
	0.949	702.5	705	703.5
	0.95	703.5	705	705.5
	0.951	702	704.5	700.5
	0.952	704.5	703	702
	0.953	700.5	704.5	707
	0.954	702	704	704
	0.955	704	702.5	702.5
	0.956	705	703.5	703
	0.957	701	705	699
	0.958	699.5	705	702.5
	0.959	699.5	705	700.5
	0.96	702.5	703	700
	0.961	705	704.5	698.5
	0.962	703	704.5	701
	0.963	702	704	703
	0.964	702	704.5	704.5
	0.965	703	700	704.5
	0.966	703.5	704	704.5
	0.967	699.5	703	706
	0.968	702.5	706.5	703.5
	0.969	703.5	705	703.5
	0.97	704.5	702	703
	0.971	701.5	701.5	705.5
	0.972	703	706	701
	0.973	699.5	704.5	705.5
	0.974	702	707	704
	0.975	700.5	704	701.5
	0.976	702	702	702
	0.977	700.5	704.5	704
	0.978	704.5	707	702.5
	0.979	703	705	704.5
	0.98	698.5	703	701
	0.981	702	704.5	703.5
	0.982	701.5	705	701.5
	0.983	697.5	704.5	701.5
	0.984	700.5	705.5	703
	0.985	698.5	704.5	702
	0.986	702	701.5	707
	0.987	700.5	705	706
	0.988	704.5	700.5	703
	0.989	702	704.5	705.5
	0.99	703.5	704	707
	0.991	705	703.5	704.5
	0.992	702.5	704.5	706.5
	0.993	701.5	704.5	703.5
	0.994	701	707	704.5
	0.995	704.5	704.5	704.5
	0.996	703.5	704.5	706
	0.997	704.5	703	703.5
	0.998	702.5	704	709.5
	0.999	705.5	705	704.5
	1	701.5	705	704.5
	1.001	699.5	703.5	707
	1.002	704.5	702	707
	1.003	703	701	704.5
	1.004	703	702	704.5
	1.005	701.5	702	700.5
	1.006	705	703	706
	1.007	704.5	700.5	707
	1.008	703.5	702	706
	1.009	703.5	703.5	708.5
	1.01	705.5	701	702.5
	1.011	705	704.5	706
	1.012	705	702	705.5
	1.013	704.5	701	704
	1.014	704.5	702	704.5
	1.015	705	700.5	705.5
	1.016	706	700.5	704.5
	1.017	702	702	701
	1.018	704	700	701.5
	1.019	704.5	705	704.5
	1.02	705	707	705
	1.021	704.5	699.5	702
	1.022	705	703	702
	1.023	706	703.5	704
	1.024	703.5	703	702.5
	1.025	704.5	700.5	705
	1.026	706	698.5	704.5
	1.027	702	702	704.5
	1.028	704.5	699.5	701
	1.029	705	700.5	704.5
	1.03	701.5	701	704
	1.031	706	699.5	703.5
	1.032	706	702.5	703
	1.033	705	696	703.5
	1.034	703.5	702.5	702
	1.035	704.5	703.5	703
	1.036	701.5	697.5	705
	1.037	702	701	705
	1.038	700.5	702.5	704
	1.039	705.5	700	701.5
	1.04	706	703	702.5
	1.041	704.5	702	705
	1.042	703	700.5	704
	1.043	708	700.5	707.5
	1.044	702	699.5	704
	1.045	707.5	699.5	703
	1.046	704	699.5	703.5
	1.047	708.5	699.5	699
	1.048	708	702.5	703.5
	1.049	707	703	700.5
	1.05	704	699	702.5
	1.051	705	702	702
	1.052	705	704.5	705
	1.053	705.5	700	705
	1.054	706.5	700	705
	1.055	705	701	706
	1.056	703	699.5	703.5
	1.057	706	702	701.5
	1.058	704.5	704.5	705.5
	1.059	704.5	698.5	704
	1.06	702.5	700.5	703
	1.061	705.5	704.5	703.5
	1.062	706	701.5	702
	1.063	704.5	703.5	703.5
	1.064	704	703	704.5
	1.065	702	701	701.5
	1.066	706	702.5	705
	1.067	703.5	702	701.5
	1.068	706.5	703	701.5
	1.069	703.5	701	701
	1.07	706	704	701.5
	1.071	708	703.5	702.5
	1.072	701.5	702.5	699.5
	1.073	704.5	702.5	702.5
	1.074	706.5	703	700.5
	1.075	700	702	702
	1.076	705.5	704.5	699.5
	1.077	705	703.5	704.5
	1.078	704.5	706	701
	1.079	703	703	703
	1.08	707.5	702.5	697.5
	1.081	704.5	707.5	702
	1.082	702	704.5	703
	1.083	704.5	708	704.5
	1.084	704	701.5	700.5
	1.085	707	704.5	703
	1.086	705	702.5	703.5
	1.087	701.5	705	699.5
	1.088	702	703	697.5
	1.089	702.5	705	697.5
	1.09	704	707	699.5
	1.091	704.5	703	702.5
	1.092	707	704	704.5
	1.093	704.5	705.5	699
	1.094	704	703.5	701.5
	1.095	704	704.5	701
	1.096	705.5	704.5	702.5
	1.097	701.5	703.5	701.5
	1.098	704.5	700	706
	1.099	704.5	706.5	699
	1.1	701.5	703.5	703
	1.101	704	703.5	701.5
	1.102	703.5	705.5	702.5
	1.103	707.5	707	702.5
	1.104	705	703.5	700
	1.105	704.5	706	700
	1.106	706.5	702	699
	1.107	704.5	704	701
	1.108	703.5	706.5	703.5
	1.109	706	707	698
	1.11	704	704.5	700
	1.111	704.5	705	699
	1.112	705.5	707.5	702.5
	1.113	704	701	699.5
	1.114	706	702.5	700.5
	1.115	704.5	704.5	701.5
	1.116	704	701	701
	1.117	705.5	705	699.5
	1.118	703	708	701
	1.119	703	705.5	699
	1.12	703.5	701	697.5
	1.121	705	705.5	703
	1.122	703	701.5	696
	1.123	703	704.5	700
	1.124	705.5	705.5	700.5
	1.125	705.5	701	702.5
	1.126	708.5	704.5	697.5
	1.127	703.5	707	702
	1.128	704.5	705	700.5
	1.129	704.5	703.5	700
	1.13	701	706.5	700.5
	1.131	704.5	705	700.5
	1.132	707	705.5	700.5
	1.133	706.5	704	700
	1.134	706.5	704.5	701.5
	1.135	705	702.5	698.5
	1.136	706	705	700
	1.137	704	706	699.5
	1.138	703	707.5	702
	1.139	706.5	704.5	700.5
	1.14	706.5	704.5	701
	1.141	707	702	701.5
	1.142	706	704	702
	1.143	703.5	703	704.5
	1.144	707	703.5	703.5
	1.145	704.5	703.5	703
	1.146	704.5	704	700.5
	1.147	704.5	703.5	699.5
	1.148	703	704	702
	1.149	703.5	701	699.5
	1.15	704.5	705	702.5
	1.151	706.5	701.5	701.5
	1.152	704.5	704	701
	1.153	705	704.5	700.5
	1.154	708	702.5	706.5
	1.155	704.5	704.5	702.5
	1.156	704.5	699.5	702.5
	1.157	707	703.5	701.5
	1.158	705	705.5	703.5
	1.159	707	700.5	703.5
	1.16	705	700	703.5
	1.161	703	704	704.5
	1.162	704.5	703.5	703.5
	1.163	707.5	699.5	703
	1.164	701.5	701.5	704.5
	1.165	706	700.5	704
	1.166	705	702.5	703.5
	1.167	704.5	699.5	705
	1.168	704	702.5	704.5
	1.169	706	700	705.5
	1.17	704	701.5	702.5
	1.171	703.5	703	703.5
	1.172	707	701	702.5
	1.173	707.5	701.5	705
	1.174	704.5	703	706
	1.175	706	697.5	706
	1.176	704.5	699	701
	1.177	706	703.5	704.5
	1.178	705	701.5	705.5
	1.179	704.5	701.5	702.5
	1.18	706	699	703.5
	1.181	704.5	696	704.5
	1.182	707	701.5	707
	1.183	705.5	699.5	705
	1.184	703.5	700.5	705
	1.185	705	697.5	704.5
	1.186	706.5	698.5	701
	1.187	705.5	697.5	704.5
	1.188	706	697	703.5
	1.189	703	697.5	703
	1.19	703	700	703
	1.191	706.5	698.5	707.5
	1.192	699.5	698	707
	1.193	704.5	697.5	707.5
	1.194	708	702	703.5
	1.195	708	699.5	706
	1.196	707	697	705.5
	1.197	704.5	701	704.5
	1.198	704	698.5	710
	1.199	703.5	699	705
	1.2	703	698.5	704
	1.201	704	699	706
	1.202	704.5	698	705.5
	1.203	706.5	699	705.5
	1.204	702.5	698	705
	1.205	702	694.5	708
	1.206	704.5	697	704.5
	1.207	702.5	699.5	703.5
	1.208	707	695	707
	1.209	702	699	704
	1.21	704.5	698.5	704.5
	1.211	704.5	699.5	705
	1.212	704	700	706.5
	1.213	703.5	697.5	704
	1.214	704.5	696	702.5
	1.215	707	697	704.5
	1.216	707.5	698.5	703.5
	1.217	701	696	701.5
	1.218	702.5	698.5	704.5
	1.219	702.5	700	703.5
	1.22	702	697.5	703
	1.221	704	698.5	703
	1.222	704.5	697.5	702
	1.223	703.5	699.5	700.5
	1.224	704.5	701	704.5
	1.225	705.5	699	706.5
	1.226	704.5	700	704.5
	1.227	708	698	703.5
	1.228	703.5	698.5	708
	1.229	702	698	704.5
	1.23	701.5	699.5	702
	1.231	703.5	701.5	705.5
	1.232	706	699.5	704
	1.233	706	699.5	701
	1.234	708	697.5	703
	1.235	701	699.5	700
	1.236	704.5	701.5	705.5
	1.237	704.5	700	707
	1.238	707	701	702
	1.239	703	704.5	701.5
	1.24	703	701.5	702.5
	1.241	703.5	700	701
	1.242	705	700.5	704
	1.243	704.5	701.5	702.5
	1.244	704.5	702	704.5
	1.245	707	702	702.5
	1.246	707.5	702.5	700
	1.247	706	700.5	701.5
	1.248	704.5	699.5	703
	1.249	707.5	702	703
	1.25	705	704.5	700.5
	1.251	703.5	702	699.5
	1.252	706	700	698.5
	1.253	705.5	701	700
	1.254	703.5	701.5	697
	1.255	707	700	700.5
	1.256	706	703.5	700
	1.257	704.5	698.5	704.5
	1.258	707.5	703.5	702.5
	1.259	705	700.5	699
	1.26	704.5	699.5	703
	1.261	703.5	698.5	704.5
	1.262	704	702.5	698.5
	1.263	704.5	698	704.5
	1.264	704.5	701.5	698
	1.265	702.5	703.5	699.5
	1.266	704.5	702	701.5
	1.267	704.5	701	702.5
	1.268	704.5	703	703
	1.269	707.5	703.5	702
	1.27	708.5	701.5	703
	1.271	706.5	704.5	704
	1.272	707.5	704.5	703
	1.273	705	704.5	700.5
	1.274	706	702	703
	1.275	704.5	702.5	699
	1.276	707	700.5	701.5
	1.277	705	704	699.5
	1.278	703	699	703
	1.279	709	699.5	699.5
	1.28	706.5	703.5	700
	1.281	704.5	704	701.5
	1.282	705.5	698.5	699
	1.283	709	702	700
	1.284	707	701	703
	1.285	704.5	699	702.5
	1.286	707.5	702	699.5
	1.287	705	705.5	704
	1.288	706.5	703.5	703.5
	1.289	704.5	707.5	699.5
	1.29	705.5	704.5	703.5
	1.291	707	704	703.5
	1.292	706.5	700	702
	1.293	704	703.5	699.5
	1.294	705.5	701.5	702.5
	1.295	708	703	703
	1.296	706.5	699	702.5
	1.297	707.5	701	703
	1.298	707	704.5	701
	1.299	707	701	701
	1.3	710	703.5	704.5
	1.301	710.5	703.5	703
	1.302	702	704.5	701
	1.303	706.5	705.5	704
	1.304	704	700	702
	1.305	707	700.5	702
	1.306	707.5	704.5	700.5
	1.307	705.5	704.5	706
	1.308	708.5	704.5	705
	1.309	708.5	704	702.5
	1.31	706	705	703.5
	1.311	707.5	703.5	704
	1.312	710	704.5	701
	1.313	707	705.5	703.5
	1.314	706.5	703	701.5
	1.315	707.5	703.5	704
	1.316	707.5	702.5	705
	1.317	708.5	705.5	704.5
	1.318	705.5	704	700.5
	1.319	705	705.5	703
	1.32	704.5	705.5	704.5
	1.321	705.5	705	703
	1.322	702.5	706.5	703
	1.323	705	705.5	703.5
	1.324	704	705	702.5
	1.325	705	703	707
	1.326	706	705.5	706.5
	1.327	706	707	702.5
	1.328	704.5	704.5	702
	1.329	706	704.5	704
	1.33	704	706.5	703
	1.331	703.5	706	701.5
	1.332	705	702.5	703.5
	1.333	705	706	701
	1.334	704.5	706	704
	1.335	704.5	704	700
	1.336	705	704	705
	1.337	705	706	703
	1.338	704	707	704.5
	1.339	704.5	708.5	704
	1.34	705	703.5	703
	1.341	705.5	705.5	700.5
	1.342	705	703.5	703.5
	1.343	705.5	705	705
	1.344	704.5	705	703
	1.345	702	703	702.5
	1.346	700	704	705
	1.347	702	707.5	703
	1.348	705.5	702	701
	1.349	700.5	707	701
	1.35	700	702.5	701.5
	1.351	704.5	704.5	703.5
	1.352	699.5	703.5	699.5
	1.353	699	704.5	701.5
	1.354	705	704.5	702
	1.355	702.5	700	701
	1.356	699.5	703	704.5
	1.357	701	708	703.5
	1.358	702.5	706	707
	1.359	700.5	701.5	701.5
	1.36	704.5	703	700
	1.361	701	707	704.5
	1.362	705	703.5	705.5
	1.363	701	701.5	699.5
	1.364	700.5	706	701
	1.365	696	701.5	700
	1.366	704	700.5	699
	1.367	703	704.5	702.5
	1.368	699	703.5	701.5
	1.369	702	703.5	701
	1.37	699	703.5	704.5
	1.371	699	701.5	701.5
	1.372	700.5	703	701
	1.373	702	704.5	702
	1.374	701.5	703.5	704.5
	1.375	698	704.5	704.5
	1.376	699	700.5	706.5
	1.377	701.5	702.5	701.5
	1.378	700.5	702.5	704.5
	1.379	702.5	703.5	701.5
	1.38	699	701	704
	1.381	701.5	704.5	702.5
	1.382	697	706.5	704.5
	1.383	702	701.5	708
	1.384	700	702.5	704.5
	1.385	699.5	703.5	703
	1.386	701.5	704.5	702
	1.387	703.5	704	701
	1.388	703.5	702	706
	1.389	698	704.5	702.5
	1.39	703	703.5	701.5
	1.391	699.5	704	701
	1.392	698.5	698.5	705
	1.393	699.5	700	701.5
	1.394	704.5	704.5	702.5
	1.395	704.5	701.5	702
	1.396	700	704.5	706
	1.397	700	702.5	704
	1.398	702	702.5	703
	1.399	702	703.5	704.5
	1.4	700	701.5	705.5
	1.401	698	700	704.5
	1.402	702	698.5	703
	1.403	702	701	705
	1.404	702.5	705	703.5
	1.405	702.5	703.5	705.5
	1.406	703.5	701.5	701.5
	1.407	701.5	701.5	702
	1.408	703	704.5	703
	1.409	704.5	700.5	700.5
	1.41	702	703	700.5
	1.411	700.5	700.5	704
	1.412	707	699.5	705
	1.413	698.5	701	703.5
	1.414	698.5	704.5	704.5
	1.415	703.5	702.5	702
	1.416	704	702.5	704.5
	1.417	700	699	697.5
	1.418	703.5	704.5	703.5
	1.419	707	703	704
	1.42	703	704.5	701
	1.421	702	704.5	701.5
	1.422	705	704	703.5
	1.423	702.5	705.5	701.5
	1.424	702	703	706.5
	1.425	704.5	703	700.5
	1.426	703	702.5	703
	1.427	706.5	705	701
	1.428	704.5	705.5	700.5
	1.429	706	701.5	702.5
	1.43	706.5	702	701.5
	1.431	703.5	704.5	704.5
	1.432	707	704	707
	1.433	703.5	700.5	703.5
	1.434	707	701.5	705.5
	1.435	704.5	700.5	701
	1.436	703	704.5	700.5
	1.437	704.5	703	702.5
	1.438	706.5	702.5	703.5
	1.439	704	702.5	702.5
	1.44	703.5	704	701.5
	1.441	707.5	704.5	701
	1.442	704.5	705	703
	1.443	707	702.5	700.5
	1.444	706.5	704.5	704.5
	1.445	704.5	705	700
	1.446	705.5	702	704
	1.447	706.5	703.5	700
	1.448	704.5	706	702
	1.449	704.5	704.5	703
	1.45	705	703	703
	1.451	704.5	705.5	703
	1.452	707	705	701.5
	1.453	702	701	703.5
	1.454	706	705	699
	1.455	705	701	700.5
	1.456	708	702	701
	1.457	703.5	706	702
	1.458	705	706	701.5
	1.459	705	704.5	703
	1.46	706.5	705	700
	1.461	705.5	704.5	704
	1.462	707	705.5	702.5
	1.463	708	703.5	703.5
	1.464	706.5	708	703.5
	1.465	708	703.5	703.5
	1.466	705.5	702	700.5
	1.467	708.5	701.5	701.5
	1.468	710.5	706	703
	1.469	706	703.5	704.5
	1.47	704.5	706.5	705.5
	1.471	709	704.5	705.5
	1.472	708.5	706	699
	1.473	708.5	704.5	704.5
	1.474	708.5	707.5	701.5
	1.475	705.5	704.5	703
	1.476	702	701.5	700.5
	1.477	707	705	704.5
	1.478	705.5	702	702.5
	1.479	705.5	702.5	703
	1.48	703.5	705	700.5
	1.481	704.5	704.5	698
	1.482	708.5	704.5	701.5
	1.483	706	704.5	702.5
	1.484	706.5	705	699
	1.485	707.5	701	704.5
	1.486	709	705	703
	1.487	707	708	703.5
	1.488	704.5	703	702
	1.489	704	704.5	702.5
	1.49	704.5	704.5	703.5
	1.491	707	703	702
	1.492	704	704.5	702
	1.493	709	703.5	704
	1.494	704	703	704.5
	1.495	705	708	703
	1.496	705	706.5	700.5
	1.497	708	703	701.5
	1.498	704.5	703.5	701.5
	1.499	708	702	701
	1.5	707	700.5	703
	1.501	702	701.5	701.5
	1.502	702	705	699.5
	1.503	708	704.5	702.5
	1.504	706	704.5	701.5
	1.505	705.5	702.5	704.5
	1.506	704.5	703.5	699
	1.507	707	704.5	705.5
	1.508	702	704.5	702
	1.509	703.5	706	702.5
	1.51	704.5	701.5	702.5
	1.511	704.5	702.5	703.5
	1.512	704.5	703.5	701
	1.513	701	704.5	703.5
	1.514	704.5	705.5	701
	1.515	704.5	705	701.5
	1.516	704.5	705	700
	1.517	705.5	704.5	701.5
	1.518	704.5	705	703
	1.519	704.5	706	704.5
	1.52	702.5	704.5	703.5
	1.521	704.5	709	702
	1.522	706.5	707	703
	1.523	704.5	708	703
	1.524	704.5	707	706.5
	1.525	703.5	705.5	701.5
	1.526	703	708	702
	1.527	700.5	705	704.5
	1.528	705.5	706.5	701.5
	1.529	705	709.5	704
	1.53	705.5	707	700
	1.531	705	706	706
	1.532	703	708	703.5
	1.533	706.5	706	704.5
	1.534	701.5	704.5	704.5
	1.535	702.5	708	700
	1.536	703	707	700
	1.537	703.5	711	703.5
	1.538	702.5	706.5	704
	1.539	701.5	705.5	701.5
	1.54	703	710.5	706
	1.541	704.5	707	703.5
	1.542	707	711	704.5
	1.543	702.5	710.5	703
	1.544	701.5	711	705
	1.545	702	709	702.5
	1.546	699.5	708	705.5
	1.547	703.5	708.5	704.5
	1.548	705	706	704.5
	1.549	705	706	706
	1.55	703.5	704	705
	1.551	701.5	707.5	702
	1.552	704.5	708	704.5
	1.553	703.5	710	705.5
	1.554	702.5	708	705
	1.555	701	705.5	703.5
	1.556	700.5	704.5	706
	1.557	702.5	704.5	700
	1.558	706	704	703.5
	1.559	703	707	702
	1.56	706	704.5	702.5
	1.561	703.5	706	703
	1.562	703.5	704.5	706
	1.563	702	705	702
	1.564	700.5	701	700.5
	1.565	704.5	699.5	701
	1.566	704.5	697.5	701.5
	1.567	701.5	704.5	702.5
	1.568	704.5	699.5	700.5
	1.569	704.5	699	703
	1.57	704.5	701	703.5
	1.571	703	699.5	702.5
	1.572	703	697.5	701.5
	1.573	705	697.5	704
	1.574	705	696	699.5
	1.575	705.5	693.5	702
	1.576	704.5	692	705
	1.577	703.5	691	701.5
	1.578	704.5	695	703.5
	1.579	703	686.5	704.5
	1.58	702.5	691	701.5
	1.581	705	690.5	702
	1.582	702.5	685	702.5
	1.583	704.5	684.5	704.5
	1.584	703.5	685.5	703.5
	1.585	702.5	683.5	704.5
	1.586	704.5	681	703
	1.587	701.5	679	702.5
	1.588	702.5	677	704.5
	1.589	704	678	704.5
	1.59	702.5	678	702.5
	1.591	704.5	675.5	705
	1.592	702.5	672	707.5
	1.593	702.5	672	705
	1.594	701.5	670	701
	1.595	705	665	704.5
	1.596	702	660.5	703.5
	1.597	700.5	660.5	704.5
	1.598	706	656.5	704.5
	1.599	705	653.5	703
	1.6	704.5	649.5	700.5
	1.601	703	648.5	701
	1.602	704.5	639.5	704
	1.603	704.5	645	698
	1.604	705	635.5	702
	1.605	703.5	631	700.5
	1.606	703	623.5	698.5
	1.607	701	618	698.5
	1.608	702.5	614.5	700
	1.609	700.5	606.5	697.5
	1.61	701.5	605	695.5
	1.611	705.5	598.5	696
	1.612	704.5	594	692.5
	1.613	702	585.5	693.5
	1.614	707	581.5	690.5
	1.615	702.5	573.5	694.5
	1.616	704.5	566.5	692.5
	1.617	701	559	690.5
	1.618	704.5	549	690.5
	1.619	704.5	543	686
	1.62	704.5	535.5	685
	1.621	703	529.5	683
	1.622	705	521.5	683
	1.623	705	516	681
	1.624	704.5	506.5	680
	1.625	702	499	681
	1.626	704.5	496	677
	1.627	702.5	486	676
	1.628	705	477.5	675.5
	1.629	704	472	668
	1.63	704	466	671.5
	1.631	704.5	457.5	669.5
	1.632	706	448	659
	1.633	705.5	442	662.5
	1.634	704.5	436.5	658
	1.635	704.5	428.5	659.5
	1.636	706	419.5	654
	1.637	702.5	412	651
	1.638	704.5	407	647
	1.639	705.5	399.5	644
	1.64	704.5	392.5	643
	1.641	704	388.5	638
	1.642	707	380.5	637.5
	1.643	705	373.5	632
	1.644	705	369	629
	1.645	705	365	626
	1.646	704.5	358	623
	1.647	703.5	353.5	622
	1.648	701.5	346.5	619
	1.649	703.5	340.5	614
	1.65	707	336	608.5
	1.651	708	329.5	606.5
	1.652	708.5	329.5	600
	1.653	707	322.5	600
	1.654	706.5	315	594.5
	1.655	704	312	590.5
	1.656	708.5	309	589
	1.657	705.5	305	584
	1.658	709	300.5	584
	1.659	707.5	296	575.5
	1.66	707.5	295.5	576.5
	1.661	707	288.5	570.5
	1.662	706	282.5	569.5
	1.663	707	283	561.5
	1.664	710	278	560
	1.665	709	272	555.5
	1.666	708	267.5	553.5
	1.667	707	262.5	547
	1.668	707	258	549.5
	1.669	707.5	253	543
	1.67	708.5	253	538.5
	1.671	708.5	248	533.5
	1.672	708	244.5	527.5
	1.673	710	239	526.5
	1.674	710.5	236.5	519.5
	1.675	707	232.5	516
	1.676	710	227.5	517
	1.677	711	225.5	510.5
	1.678	710.5	217.5	503.5
	1.679	707	214.5	498
	1.68	711	217.5	493.5
	1.681	708	210	489.5
	1.682	708	209.5	485
	1.683	710	205.5	485.5
	1.684	710	205	478.5
	1.685	710.5	198.5	471.5
	1.686	707	198.5	465
	1.687	708.5	193	462
	1.688	711	194	455
	1.689	709	188.5	448
	1.69	708	189	442.5
	1.691	710	184	437
	1.692	708	178.5	426.5
	1.693	709.5	181	421
	1.694	710.5	177	417.5
	1.695	708.5	174	410
	1.696	711	169.5	400.5
	1.697	709	168	397
	1.698	710	166.5	389.5
	1.699	711	163.5	384
	1.7	710	164	377.5
	1.701	710.5	157.5	374.5
	1.702	709	153	362.5
	1.703	709	152.5	358.5
	1.704	708.5	149.5	352.5
	1.705	711	150	344.5
	1.706	709.5	144	340
	1.707	711	145	334.5
	1.708	714	140.5	326
	1.709	709	137	323
	1.71	711	135.5	318
	1.711	710	132.5	309.5
	1.712	711	131.5	304
	1.713	706	134	297.5
	1.714	706	131	292.5
	1.715	708	128.5	287
	1.716	703.5	127.5	277.5
	1.717	711	126.5	274.5
	1.718	710	123	269.5
	1.719	706.5	118.5	263
	1.72	708	118.5	260
	1.721	706.5	120.5	255.5
	1.722	708.5	117	251.5
	1.723	706	118.5	246
	1.724	709	116.5	242.5
	1.725	706.5	112	239.5
	1.726	706.5	111.5	236
	1.727	706	115	229.5
	1.728	705.5	113.5	226.5
	1.729	706	112	221.5
	1.73	703	112	218.5
	1.731	706.5	112	216.5
	1.732	705	111.5	211.5
	1.733	704.5	107.5	205.5
	1.734	704.5	107.5	202.5
	1.735	704.5	111	200
	1.736	704.5	108.5	202.5
	1.737	702.5	109.5	198
	1.738	703.5	104	192.5
	1.739	701	105	193.5
	1.74	697.5	108.5	188
	1.741	699.5	108	189
	1.742	699	110	184.5
	1.743	697	109.5	180.5
	1.744	694	107.5	181
	1.745	694.5	108.5	178.5
	1.746	697.5	112.5	177.5
	1.747	693	110	176
	1.748	691	111	173
	1.749	691	110.5	174.5
	1.75	689.5	109.5	168.5
	1.751	689	110.5	168
	1.752	685	112	169
	1.753	684.5	113	164
	1.754	681	112.5	165.5
	1.755	680	114.5	164.5
	1.756	677	113.5	165
	1.757	677.5	114	167
	1.758	669.5	116.5	166.5
	1.759	670	112.5	165
	1.76	666.5	122.5	169
	1.761	665	116	171
	1.762	661.5	119	174
	1.763	657.5	122	173.5
	1.764	655.5	123	171
	1.765	651	123.5	176
	1.766	646	125	178
	1.767	642	127	180
	1.768	640.5	131	181.5
	1.769	634.5	132	182
	1.77	628.5	137	186
	1.771	621.5	140.5	184.5
	1.772	618.5	144	187
	1.773	614.5	150.5	189.5
	1.774	611	157.5	191.5
	1.775	603	167	190
	1.776	599	171	190
	1.777	596	184.5	192
	1.778	591	191	194.5
	1.779	581	200.5	196.5
	1.78	579.5	208.5	196
	1.781	569	218.5	198.5
	1.782	568	228.5	198
	1.783	560.5	237.5	198
	1.784	554	248.5	203
	1.785	551	254.5	201
	1.786	546.5	267	204
	1.787	538.5	272.5	205
	1.788	533.5	281	205.5
	1.789	528.5	282.5	204
	1.79	523.5	289.5	209
	1.791	517	297	207.5
	1.792	510.5	295	209
	1.793	507	299	217.5
	1.794	502	300.5	215
	1.795	493	300.5	215.5
	1.796	491	302.5	220.5
	1.797	481	304.5	221.5
	1.798	478.5	303	224.5
	1.799	472	298.5	226
	1.8	466.5	302	225.5
	1.801	458.5	295.5	228.5
	1.802	456	294	230
	1.803	451	287.5	234
	1.804	440.5	286.5	233.5
	1.805	436	280	235.5
	1.806	435.5	272	238
	1.807	427.5	271	238
	1.808	424	266.5	238.5
	1.809	418.5	260.5	239
	1.81	410	256.5	243
	1.811	407	251.5	239
	1.812	398	247.5	242
	1.813	394.5	240.5	244.5
	1.814	391	239	242
	1.815	383.5	236.5	244
	1.816	377	231	241.5
	1.817	368	229	244
	1.818	364	222	245.5
	1.819	357.5	223	244.5
	1.82	351	224	242.5
	1.821	343.5	218	240
	1.822	341.5	218.5	239
	1.823	334.5	213.5	235
	1.824	325.5	214.5	234.5
	1.825	320.5	211	235
	1.826	312.5	215.5	230.5
	1.827	305	211.5	225.5
	1.828	295	210	226
	1.829	292	210	220.5
	1.83	282	207	220
	1.831	277	210.5	224
	1.832	269	214	216.5
	1.833	263	212	217
	1.834	256.5	212	215.5
	1.835	250	211.5	214.5
	1.836	245.5	216.5	215.5
	1.837	241	211.5	208
	1.838	232	218.5	205
	1.839	226	220	207.5
	1.84	224.5	221.5	205
	1.841	216	224	205
	1.842	208	224.5	200
	1.843	212	229	199
	1.844	207.5	232.5	200
	1.845	197	237	194
	1.846	195	239	195.5
	1.847	188	242	197
	1.848	184	249.5	194
	1.849	181.5	253	192.5
	1.85	176	256.5	193
	1.851	172.5	262	195
	1.852	167	261.5	192
	1.853	164	272.5	196.5
	1.854	157	274.5	194.5
	1.855	154.5	280	189.5
	1.856	149	284	193.5
	1.857	149.5	292	192
	1.858	143.5	295	194
	1.859	138	299	192.5
	1.86	136.5	304	190.5
	1.861	136	310	194
	1.862	134	319	191.5
	1.863	129.5	319.5	195
	1.864	128	326.5	196.5
	1.865	123	333.5	196.5
	1.866	124	339.5	196
	1.867	122.5	342	196
	1.868	123	348.5	199.5
	1.869	123	352.5	198
	1.87	118	356	202
	1.871	116	362.5	201.5
	1.872	112.5	366	201.5
	1.873	114.5	369.5	200.5
	1.874	109	375	206
	1.875	109	377	201
	1.876	109	384	206
	1.877	108	388.5	206
	1.878	104	391.5	203
	1.879	102	397.5	210
	1.88	99	404.5	209.5
	1.881	98.5	411	207.5
	1.882	98.5	420.5	209.5
	1.883	95	425.5	212
	1.884	93	434	212
	1.885	92.5	437.5	212.5
	1.886	98	450.5	212
	1.887	91	456.5	216
	1.888	93	465	217
	1.889	88.5	475.5	215.5
	1.89	88	485.5	218.5
	1.891	88	497	222
	1.892	85	505	222.5
	1.893	85	513	223
	1.894	81	526.5	225
	1.895	83.5	535	225
	1.896	82	545.5	228
	1.897	79.5	560	232
	1.898	84.5	567.5	229.5
	1.899	80	583	233.5
	1.9	80	595	234.5
	1.901	82.5	609	239
	1.902	82	618	239.5
	1.903	81.5	628	243
	1.904	80.5	642	245
	1.905	81	651	248.5
	1.906	81.5	666	248.5
	1.907	80	675	253
	1.908	82	693	257
	1.909	86.5	697.5	257.5
	1.91	80.5	710	259
	1.911	79	725	266
	1.912	84	737	264.5
	1.913	86	749	269.5
	1.914	84	759.5	273.5
	1.915	84.5	770.5	273.5
	1.916	88	785	277.5
	1.917	86.5	797	283
	1.918	88.5	807	284.5
	1.919	88	818.5	288
	1.92	91.5	830	295
	1.921	93.5	838.5	298
	1.922	93	850	300.5
	1.923	90.5	862	307.5
	1.924	97.5	868	310.5
	1.925	95	877.5	314
	1.926	99	893.5	321.5
	1.927	96.5	898.5	320
	1.928	101.5	904.5	331.5
	1.929	101.5	915.5	335
	1.93	102.5	923	337
	1.931	104.5	932.5	343.5
	1.932	104	937	351.5
	1.933	104	948.5	358.5
	1.934	104	954	361
	1.935	106	964.5	368
	1.936	114	967	375
	1.937	107.5	978	380
	1.938	112	985.5	388
	1.939	111.5	993	394.5
	1.94	115.5	999.5	402
	1.941	118	1008.5	406
	1.942	113	1019	414
	1.943	117	1026	420.5
	1.944	121	1036.5	430.5
	1.945	121	1048.5	437.5
	1.946	118.5	1060	445
	1.947	116	1067	451
	1.948	118	1080	460.5
	1.949	121.5	1091	471
	1.95	121	1098.5	474.5
	1.951	120	1111	485
	1.952	122.5	1124	493.5
	1.953	121.5	1139.5	503.5
	1.954	120.5	1154.5	513
	1.955	123	1169	522
	1.956	121	1179.5	532
	1.957	124.5	1193.5	542
	1.958	123	1207.5	553.5
	1.959	124	1217.5	561.5
	1.96	127.5	1235.5	568.5
	1.961	126	1247.5	580
	1.962	126.5	1262.5	591.5
	1.963	126.5	1277	604
	1.964	127	1287.5	613
	1.965	129.5	1303	619.5
	1.966	129	1312	633.5
	1.967	126.5	1321	636
	1.968	132.5	1337	649
	1.969	128	1351.5	658.5
	1.97	134	1364	670
	1.971	135.5	1372.5	677.5
	1.972	135.5	1385	687.5
	1.973	137	1396.5	698.5
	1.974	138	1410.5	709
	1.975	140.5	1425	718
	1.976	141	1433.5	727.5
	1.977	142.5	1445	738.5
	1.978	145.5	1456.5	745
	1.979	146	1469	755.5
	1.98	151.5	1480	768
	1.981	150	1495.5	779
	1.982	153	1501	792.5
	1.983	157.5	1514.5	803.5
	1.984	164	1525	811
	1.985	168.5	1535.5	823.5
	1.986	176	1545.5	837
	1.987	185	1559	852.5
	1.988	194	1567	856.5
	1.989	208.5	1572.5	873
	1.99	218.5	1583	883
	1.991	233.5	1587	896.5
	1.992	241.5	1600.5	907.5
	1.993	255.5	1605.5	922.5
[truncated: 6,006 more rows]

## Sheet: D
DataTypeVer2.0	Time	Fz	Fz	Fz
NumberOfData		8000	8000	8000
PreTriggerData		0	0	0
SamplingTime[ms]		1	1	1
DataLabel		X1:CMJ	X2:CMJ	X3:CMJ
DataUnit	sec	N	N	N
	0	644.5	643	650.5
	0.001	645.5	647	650.5
	0.002	643.5	643.5	648.5
	0.003	647.5	643	645.5
	0.004	644.5	646.5	653
	0.005	646.5	644.5	648
	0.006	647	644	649.5
	0.007	644.5	645	650
	0.008	647.5	646.5	652
	0.009	643	646	655
	0.01	643	648	653
	0.011	647.5	644.5	653
	0.012	643	645	653
	0.013	647	650	655
	0.014	646	648.5	653
	0.015	641	648	655.5
	0.016	643	648	654.5
	0.017	643.5	647.5	656.5
	0.018	646.5	646.5	653.5
	0.019	644	649.5	656.5
	0.02	644.5	646.5	656
	0.021	643	649.5	656.5
	0.022	645.5	647	652
	0.023	647.5	649	656.5
	0.024	646.5	648.5	655.5
	0.025	647.5	647	652
	0.026	642	648	654.5
	0.027	644	647.5	655.5
	0.028	644	645.5	654
	0.029	645	646.5	656.5
	0.03	641	647	656.5
	0.031	642	646.5	656.5
	0.032	642	649.5	655.5
	0.033	645	649.5	656.5
	0.034	642	647.5	654
	0.035	643.5	649	656
	0.036	645	649.5	652.5
	0.037	643	649.5	655
	0.038	641.5	647	656.5
	0.039	643	643	654.5
	0.04	643.5	647	654
	0.041	645.5	646.5	658
	0.042	643.5	643.5	654.5
	0.043	641.5	644.5	652.5
	0.044	644.5	644	654
	0.045	646	643.5	652.5
	0.046	643	644.5	651.5
	0.047	645	642.5	652.5
	0.048	643	644	654
	0.049	643.5	644	654
	0.05	645	641.5	652
	0.051	645	643.5	653.5
	0.052	644.5	644.5	652
	0.053	644	644	651.5
	0.054	646	643	651.5
	0.055	646	643.5	647.5
	0.056	643	642	647
	0.057	648	640.5	650.5
	0.058	646.5	642	647
	0.059	644	644	648.5
	0.06	645.5	643.5	646.5
	0.061	648	642	645
	0.062	645	642	649
	0.063	645	642	641.5
	0.064	646	640.5	647
	0.065	645.5	641	647.5
	0.066	648.5	638.5	642.5
	0.067	646.5	641.5	644.5
	0.068	648	640	645.5
	0.069	650	640.5	640.5
	0.07	647.5	640.5	644
	0.071	648	639	642
	0.072	647	639.5	643.5
	0.073	650	639	640.5
	0.074	649.5	641	639.5
	0.075	648.5	640	643
	0.076	649.5	640	640
	0.077	647	639.5	640
	0.078	648.5	640.5	639.5
	0.079	649.5	640.5	638
	0.08	648.5	641.5	638
	0.081	649	643.5	642
	0.082	648	639	633.5
	0.083	646.5	639.5	637
	0.084	647.5	637.5	636.5
	0.085	648	639	636
	0.086	649.5	639	638
	0.087	646.5	639	637.5
	0.088	650.5	642	640
	0.089	649	639	634.5
	0.09	648.5	642	631
	0.091	648.5	639	636
	0.092	651	642	634
	0.093	650	638	636
	0.094	648	637.5	634.5
	0.095	647	640	634
	0.096	651.5	641	636
	0.097	649.5	640	634
	0.098	647.5	642	632.5
	0.099	650.5	643.5	631.5
	0.1	649	643	633
	0.101	649.5	642	631
	0.102	649.5	642.5	629
	0.103	648.5	642	628.5
	0.104	649.5	639	632.5
	0.105	647.5	641	631
	0.106	649.5	643	633.5
	0.107	650	641.5	629
	0.108	647	637	631.5
	0.109	646	639.5	629
	0.11	647	643	631
	0.111	651	640.5	635.5
	0.112	652.5	641.5	632.5
	0.113	649.5	642	636
	0.114	649.5	642	634.5
	0.115	649.5	644.5	636
	0.116	646	641.5	635.5
	0.117	649.5	644.5	638
	0.118	649.5	639	636
	0.119	648	641	634
	0.12	647.5	642	635.5
	0.121	648.5	644.5	638.5
	0.122	649	644	639
	0.123	649	643	636.5
	0.124	649.5	643	634
	0.125	649	641	635.5
	0.126	647	644.5	636
	0.127	648	644.5	638
	0.128	649.5	645.5	637
	0.129	649.5	642.5	638
	0.13	649.5	643.5	638
	0.131	653.5	644	636
	0.132	653	644	639.5
	0.133	649.5	643	634
	0.134	650.5	645.5	636
	0.135	652	645.5	632.5
	0.136	649.5	642.5	634.5
	0.137	654	642	632
	0.138	649.5	644	634
	0.139	651.5	646.5	631
	0.14	651	644.5	631.5
	0.141	654	642	635
	0.142	652	643.5	632
	0.143	650.5	642	632.5
	0.144	651	644	633
	0.145	653	646	630.5
	0.146	649	643	630
	0.147	653	642	629
	0.148	652.5	645.5	627
	0.149	652.5	642	631
	0.15	650.5	644.5	629.5
	0.151	650.5	643	632.5
	0.152	653	641.5	632.5
	0.153	649.5	642	632.5
	0.154	652.5	642	628
	0.155	651	643	632
	0.156	653.5	642	630
	0.157	655.5	641.5	630.5
	0.158	652.5	644.5	631.5
	0.159	649.5	640.5	630
	0.16	653	643	635
	0.161	649.5	642	633.5
	0.162	648.5	642	634
	0.163	652	639	632.5
	0.164	650.5	640	635.5
	0.165	651	642	635.5
	0.166	649.5	639	634.5
	0.167	649.5	639	634
	0.168	652.5	639.5	634.5
	0.169	650.5	643.5	632
	0.17	651	639.5	634
	0.171	648.5	641	639
	0.172	648.5	641	636
	0.173	651	639.5	638
	0.174	648.5	642.5	642
	0.175	648.5	638	638.5
	0.176	648.5	642	639
	0.177	648	640.5	637
	0.178	648.5	636	640.5
	0.179	649.5	637	641.5
	0.18	649.5	640	642
	0.181	648	640.5	640.5
	0.182	646.5	640	643.5
	0.183	647.5	639.5	643
	0.184	648	639.5	642
	0.185	650	641.5	640.5
	0.186	649	642	642.5
	0.187	646.5	642	645.5
	0.188	645.5	638	643.5
	0.189	650	641	645.5
	0.19	646.5	642	644
	0.191	650.5	640.5	644.5
	0.192	647	639	645.5
	0.193	644	639.5	646.5
	0.194	646.5	639.5	646
	0.195	647	639	647.5
	0.196	645	639.5	643.5
	0.197	647	643	650
	0.198	650	641.5	647.5
	0.199	646	645.5	647
	0.2	647.5	643	643.5
	0.201	647.5	640	650.5
	0.202	646.5	643	648.5
	0.203	645	640.5	646.5
	0.204	646.5	640	647
	0.205	645	642	645
	0.206	645	639.5	644
	0.207	645	638.5	643.5
	0.208	645.5	642	644
	0.209	647.5	643	646.5
	0.21	643	640.5	647
	0.211	644	643	646
	0.212	643.5	641.5	645.5
	0.213	645	643.5	644
	0.214	645	644.5	644
	0.215	645.5	644.5	640.5
	0.216	646.5	647	644
	0.217	642	643.5	644.5
	0.218	644	643.5	646
	0.219	646	644.5	643
	0.22	642.5	647.5	643
	0.221	644.5	646.5	640.5
	0.222	644	648.5	640
	0.223	641	644.5	644.5
	0.224	643	647	639
	0.225	647	648.5	642
	0.226	648.5	644	642
	0.227	645	647.5	640
	0.228	642	648.5	640
	0.229	646	649.5	643.5
	0.23	643.5	649.5	638.5
	0.231	643	649.5	639.5
	0.232	644.5	648.5	643
	0.233	641.5	650	639.5
	0.234	641.5	645.5	644.5
	0.235	644	651.5	643.5
	0.236	643.5	653	644
	0.237	642	648.5	640
	0.238	641	645	642
	0.239	643.5	649.5	647
	0.24	643.5	651.5	642.5
	0.241	645	647.5	644.5
	0.242	645.5	648.5	643.5
	0.243	648	646.5	645
	0.244	646.5	652	645.5
	0.245	646.5	648	646
	0.246	645	650	648
	0.247	646	650	646
	0.248	646	650.5	647
	0.249	646	650	647.5
	0.25	643	646	651
	0.251	643.5	647	649.5
	0.252	647.5	649	646.5
	0.253	646.5	645.5	651.5
	0.254	647.5	647.5	651.5
	0.255	644.5	647.5	652.5
	0.256	648	643	651.5
	0.257	645	649.5	649.5
	0.258	644.5	649	653.5
	0.259	642	645	655.5
	0.26	644	647.5	661.5
	0.261	646.5	646	664.5
	0.262	644	650	667
	0.263	644.5	647.5	668.5
	0.264	646	645	670.5
	0.265	647	646.5	665
	0.266	647	647.5	663.5
	0.267	647.5	648.5	663.5
	0.268	649.5	647.5	663
	0.269	646.5	648	656.5
	0.27	650	648.5	658.5
	0.271	648.5	646.5	656.5
	0.272	648	652	659.5
	0.273	646	646.5	660
	0.274	649	648.5	659.5
	0.275	650	648	656.5
	0.276	651.5	646.5	660.5
	0.277	649.5	646.5	659
	0.278	651	648	663
	0.279	649.5	647	662
	0.28	651.5	646.5	662
	0.281	649.5	646.5	656.5
	0.282	651	645.5	652.5
	0.283	652.5	647.5	651.5
	0.284	651	648	653.5
	0.285	649.5	644.5	649.5
	0.286	650	648.5	652
	0.287	651	645.5	653
	0.288	652	648.5	652.5
	0.289	653	648.5	651.5
	0.29	649.5	647.5	651
	0.291	653	647	649
	0.292	652.5	644.5	650
	0.293	649.5	648.5	649.5
	0.294	654	644.5	649
	0.295	651.5	646	646
	0.296	652	646.5	644.5
	0.297	652.5	648.5	646
	0.298	652.5	650.5	644
	0.299	654.5	645.5	643.5
	0.3	653	645.5	646.5
	0.301	652	646	644.5
	0.302	654	646	646.5
	0.303	655.5	646	645
	0.304	655	643	643.5
	0.305	649.5	648	645
	0.306	652.5	645	645
	0.307	653.5	645.5	644
	0.308	650	647	647
	0.309	652.5	645	644.5
	0.31	648.5	648.5	641.5
	0.311	654	646	643.5
	0.312	652.5	645.5	646.5
	0.313	654	644	643
	0.314	652	645.5	643
	0.315	653.5	647	646
	0.316	651.5	646	648.5
	0.317	652.5	645.5	642
	0.318	651	644.5	642
	0.319	653	646	644
	0.32	652	647.5	643
	0.321	652	643	642
	0.322	653.5	646	643
	0.323	655	642	643
	0.324	651.5	644.5	642
	0.325	652	647	644
	0.326	649.5	644.5	643.5
	0.327	653	645	644
	0.328	651.5	645.5	641.5
	0.329	652	649.5	643.5
	0.33	650.5	642	645
	0.331	650.5	643	643
	0.332	651	643	639.5
	0.333	649.5	646	644
	0.334	647.5	644	640.5
	0.335	650	643	642
	0.336	647.5	643	641
	0.337	647	645	643
	0.338	647.5	643	641
	0.339	649.5	645	642
	0.34	645.5	641	637
	0.341	647.5	644	640
	0.342	650	642.5	636
	0.343	646	645.5	640
	0.344	647	645.5	636
	0.345	648	641.5	634.5
	0.346	646.5	645.5	636.5
	0.347	646.5	644.5	636.5
	0.348	648.5	643.5	634
	0.349	651.5	642	633.5
	0.35	648.5	639.5	631
	0.351	648	644	634.5
	0.352	644.5	644	634
	0.353	646.5	644.5	630
	0.354	645.5	644	629
	0.355	644.5	645	628.5
	0.356	644.5	644	627
	0.357	646.5	643.5	629
	0.358	646.5	647	630.5
	0.359	645	643	629.5
	0.36	644	645.5	629
	0.361	647	643	633
	0.362	645.5	643	629
	0.363	644.5	643	629.5
	0.364	643	642	629
	0.365	645.5	645.5	629.5
	0.366	645.5	644	631
	0.367	644	643.5	626.5
	0.368	646.5	648.5	629
	0.369	643	642	630
	0.37	649.5	642.5	627
	0.371	646.5	648	626.5
	0.372	647	643	627
	0.373	649.5	646.5	625.5
	0.374	645.5	644.5	629
	0.375	643.5	641.5	627
	0.376	645.5	643	627
	0.377	648	643.5	630
	0.378	643	641	630.5
	0.379	645.5	645	627
	0.38	643.5	643	630
	0.381	648	642	631
	0.382	645.5	645	626.5
	0.383	649	644	630
	0.384	648.5	643.5	632
	0.385	646	643	629.5
	0.386	647.5	644	632.5
	0.387	648.5	645	633
	0.388	644.5	643	632.5
	0.389	647	641.5	632
	0.39	645	644.5	632
	0.391	646.5	642	632.5
	0.392	650	645	629
	0.393	647.5	643	633
	0.394	648.5	645	633.5
	0.395	648	645.5	635.5
	0.396	649	644	636
	0.397	647.5	645.5	636
	0.398	648.5	641	636
	0.399	646	647.5	634
	0.4	648	645	636
	0.401	647.5	642	636.5
	0.402	649.5	645.5	639
	0.403	646.5	643	637.5
	0.404	652	646.5	640
	0.405	649.5	645	639
	0.406	649.5	643.5	641.5
	0.407	649.5	648	638.5
	0.408	648.5	643.5	643
	0.409	647.5	645	639.5
	0.41	650	647.5	642
	0.411	649.5	645.5	645.5
	0.412	647	644.5	647
	0.413	647	643.5	644
	0.414	648	645	646.5
	0.415	648.5	648	645.5
	0.416	648.5	645.5	646
	0.417	649	647	643
	0.418	647	645.5	646.5
	0.419	648	643.5	649.5
	0.42	651	646	648.5
	0.421	647	647.5	647
	0.422	648.5	646.5	649
	0.423	646.5	647.5	651.5
	0.424	646	648	650
	0.425	648.5	647	655.5
	0.426	649	650	651.5
	0.427	649.5	645.5	653.5
	0.428	648	649	656.5
	0.429	650.5	645.5	656.5
	0.43	647.5	647	661
	0.431	648.5	647	656.5
	0.432	645	646.5	659
	0.433	647	647	662
	0.434	651	647.5	659.5
	0.435	650	645.5	663
	0.436	648	649	662.5
	0.437	646.5	647	663.5
	0.438	648	646.5	663.5
	0.439	645	648	662
	0.44	643.5	648	662.5
	0.441	649.5	646.5	665.5
	0.442	645.5	651	663.5
	0.443	647.5	649	665.5
	0.444	646	644	666.5
	0.445	647	649.5	667.5
	0.446	649.5	646.5	663.5
	0.447	646	644	667
	0.448	646.5	647.5	665.5
	0.449	646.5	650	666
	0.45	648.5	647.5	666.5
	0.451	646	648.5	665.5
	0.452	646.5	646.5	668
	0.453	646	651.5	668.5
	0.454	645	646	667.5
	0.455	648.5	647	668
	0.456	646.5	644.5	664.5
	0.457	646.5	649.5	666
	0.458	644.5	645.5	667.5
	0.459	644.5	647	666.5
	0.46	643.5	648.5	665
	0.461	646.5	647.5	665
	0.462	643.5	646	664.5
	0.463	646.5	648	664.5
	0.464	649.5	644.5	666
	0.465	645	651	661.5
	0.466	644.5	647	662.5
	0.467	648	646	665.5
	0.468	644.5	644.5	661.5
	0.469	648	648.5	663.5
	0.47	645.5	648	662
	0.471	645.5	648.5	662
	0.472	646	647.5	663.5
	0.473	646.5	645.5	661
	0.474	646.5	648.5	665
	0.475	647	643.5	659.5
	0.476	647.5	646.5	661.5
	0.477	645.5	647.5	662
	0.478	645.5	645.5	661.5
	0.479	646	647	663.5
	0.48	646	645.5	659.5
	0.481	645	645.5	666.5
	0.482	646	643	661
	0.483	647	645.5	663.5
	0.484	644.5	644	660.5
	0.485	645.5	647.5	663
	0.486	646	646.5	663
	0.487	646.5	645.5	660.5
	0.488	644	644.5	659.5
	0.489	645	647.5	658
	0.49	643.5	645.5	659
	0.491	645.5	643.5	663.5
	0.492	648	643.5	662.5
	0.493	645.5	644.5	661
	0.494	646.5	648.5	661
	0.495	647.5	644.5	663
	0.496	647	648	661.5
	0.497	648.5	645.5	662
	0.498	647	646	663.5
	0.499	648.5	644.5	661.5
	0.5	645	644.5	661
	0.501	644.5	648.5	661.5
	0.502	648	644.5	661.5
	0.503	647.5	644	662
	0.504	646	646	662.5
	0.505	645	645	661
	0.506	647.5	645.5	663.5
	0.507	645	648	659.5
	0.508	646	646.5	656.5
	0.509	648.5	645	659
	0.51	648	643.5	658.5
	0.511	650	643	659
	0.512	649	643	659.5
	0.513	648.5	645.5	653
	0.514	649.5	646.5	658.5
	0.515	647.5	648	653
	0.516	646	646.5	652.5
	0.517	650	644.5	651
	0.518	647	644	653
	0.519	648	642.5	654
	0.52	646	644.5	649.5
	0.521	645	644.5	651.5
	0.522	648.5	644.5	648.5
	0.523	647	640	647.5
	0.524	649.5	643.5	649
	0.525	651	645	648.5
	0.526	649	644	645.5
	0.527	648	645	647.5
	0.528	649	645.5	644.5
	0.529	649.5	644	645
	0.53	649	646.5	645.5
	0.531	648.5	645	643.5
	0.532	648.5	642.5	645
	0.533	646	645.5	643.5
	0.534	646.5	645.5	643.5
	0.535	650	644.5	645.5
	0.536	649.5	640	638
	0.537	646.5	641.5	642
	0.538	649	644.5	640.5
	0.539	650.5	644	641
	0.54	649	644.5	642
	0.541	650.5	643	641
	0.542	651	643	638
	0.543	647.5	644	638.5
	0.544	653.5	641	638
	0.545	649.5	644.5	636
	0.546	650	643	637.5
	0.547	648	643	637.5
	0.548	650	643.5	635.5
	0.549	647.5	643	636.5
	0.55	649.5	643	636.5
	0.551	651.5	643	634.5
	0.552	648.5	639	633.5
	0.553	649	646.5	635
	0.554	646.5	646	635.5
	0.555	649	642	638
	0.556	644.5	642	635
	0.557	647	643	635.5
	0.558	648	643	633.5
	0.559	648	641.5	632.5
	0.56	646.5	641.5	630.5
	0.561	648	640.5	632
	0.562	651	642	633
	0.563	647	642	626.5
	0.564	644.5	639.5	631
	0.565	648	641	626.5
	0.566	648.5	644.5	627
	0.567	650	642.5	627
	0.568	650.5	643	629
	0.569	649.5	643.5	627
	0.57	647	641.5	622
	0.571	645.5	643	623.5
	0.572	649.5	644.5	626
	0.573	651.5	643	620.5
	0.574	645.5	644.5	619.5
	0.575	648	642	620.5
	0.576	651	643.5	622
	0.577	652	645.5	619.5
	0.578	647	643	622
	0.579	646.5	643.5	622
	0.58	651.5	641	618.5
	0.581	647.5	643	617
	0.582	647.5	646	616.5
	0.583	648.5	638.5	614.5
	0.584	649.5	643	610.5
	0.585	647.5	646	613.5
	0.586	649.5	643	609.5
	0.587	650.5	647.5	613.5
	0.588	648.5	646	610
	0.589	647	644	611.5
	0.59	649.5	645.5	611
	0.591	648.5	647	610
	0.592	644.5	645.5	608.5
	0.593	649.5	645	608.5
	0.594	646.5	645	605.5
	0.595	651	644	607
	0.596	643	643	601.5
	0.597	644	646	604.5
	0.598	645	644.5	604
	0.599	646.5	646.5	601.5
	0.6	647	647.5	601
	0.601	645.5	643.5	604
	0.602	648.5	648	601.5
	0.603	646.5	643.5	601.5
	0.604	649.5	644	599.5
	0.605	644	648	600
	0.606	644	648	600.5
	0.607	649.5	649	599.5
	0.608	649	649.5	598
	0.609	644.5	648.5	600
	0.61	644.5	648	599
	0.611	648.5	647.5	598.5
	0.612	648.5	649.5	599.5
	0.613	645.5	648.5	596.5
	0.614	648.5	654.5	599
	0.615	645	651	597
	0.616	646.5	648.5	596.5
	0.617	647.5	646.5	596.5
	0.618	649.5	649	597
	0.619	648.5	650	595.5
	0.62	645	650.5	597.5
	0.621	648.5	651	596
	0.622	647	650	601
	0.623	646.5	649	600
	0.624	649	649	599
	0.625	649	649	599.5
	0.626	647.5	650	600.5
	0.627	646	649.5	602
	0.628	649.5	649	604
	0.629	648	649.5	604.5
	0.63	648	650	603
	0.631	646.5	650	608.5
	0.632	645.5	653	607
	0.633	648	648.5	607.5
	0.634	648	650	610
	0.635	649.5	652	612
	0.636	649.5	648.5	617
	0.637	649.5	651.5	618
	0.638	647	649.5	619
	0.639	648.5	649	621.5
	0.64	649.5	649.5	622
	0.641	649	652.5	622
	0.642	649	652.5	625
	0.643	648	649.5	626
	0.644	649	652.5	627
	0.645	650.5	651.5	629
	0.646	649.5	648	629
	0.647	648	650	628.5
	0.648	647	646.5	636
	0.649	653	652	636.5
	0.65	645.5	649.5	638.5
	0.651	650.5	652	640
	0.652	650	651	639.5
	0.653	649.5	651.5	641.5
	0.654	646.5	647	647
	0.655	649	649.5	649.5
	0.656	649.5	648.5	647.5
	0.657	652	646.5	649.5
	0.658	649	643.5	651
	0.659	651.5	648.5	656
	0.66	653	649.5	656.5
	0.661	649.5	649	656.5
	0.662	649.5	649.5	658.5
	0.663	653.5	648.5	659.5
	0.664	647.5	647	665.5
	0.665	649.5	647	667
	0.666	652	646.5	665
	0.667	647	646.5	667
	0.668	647	647	664
	0.669	650	648.5	668.5
	0.67	654.5	648	668
	0.671	649.5	646	676
	0.672	649.5	644.5	672
	0.673	651	650	673
	0.674	649.5	646	672.5
	0.675	648.5	646.5	673.5
	0.676	649.5	647	675.5
	0.677	651.5	646.5	677
	0.678	651.5	645	679.5
	0.679	648.5	647	679
	0.68	649.5	646.5	676.5
	0.681	649.5	645	677
	0.682	649.5	645	677
	0.683	650	646	679
	0.684	649.5	644	679
	0.685	651	647.5	677
	0.686	652.5	647	680.5
	0.687	649.5	644	677
	0.688	649	642.5	680
	0.689	649.5	646.5	677
	0.69	649.5	645	678.5
	0.691	645.5	643	677.5
	0.692	645.5	644	677
	0.693	647.5	644.5	676.5
	0.694	647	642	674.5
	0.695	649	646	677
	0.696	644.5	640	674
	0.697	648.5	645	675
	0.698	650	645.5	678
	0.699	647.5	642.5	673
	0.7	645.5	643	671.5
	0.701	646	642	671
	0.702	650	643.5	669
	0.703	649	642	670
	0.704	647.5	644.5	665
	0.705	643.5	643.5	670
	0.706	647.5	646.5	670
	0.707	646	647.5	663.5
	0.708	649.5	645.5	664
	0.709	649	644.5	663.5
	0.71	643	642	662
	0.711	645.5	642.5	659
	0.712	647.5	643.5	656.5
	0.713	647	643.5	658.5
	0.714	647	643	655
	0.715	648.5	642	654
	0.716	645.5	646	652.5
	0.717	647	643	650.5
	0.718	643	645	650
	0.719	650	644.5	649.5
	0.72	647.5	642.5	645.5
	0.721	643	644.5	643.5
	0.722	644	642	643
	0.723	646	644	642
	0.724	645	645.5	640.5
	0.725	649.5	643	637
	0.726	644	643.5	637
	0.727	646	645	636
	0.728	646	644.5	637.5
	0.729	648	646.5	633.5
	0.73	650.5	644.5	631
	0.731	650	649	631
	0.732	649.5	645.5	631
	0.733	645.5	646.5	633
	0.734	647	647	630.5
	0.735	646.5	647.5	629
	0.736	646	646	629
	0.737	646.5	645	627
	0.738	646.5	643	627
	0.739	646	648	625
	0.74	648	643	626
	0.741	647	645.5	625
	0.742	646.5	643.5	627
	0.743	646	646	626.5
	0.744	648.5	646.5	627
	0.745	646	644.5	622.5
	0.746	646.5	645	625
	0.747	648	645	624.5
	0.748	646	644.5	626
	0.749	645.5	647.5	624
	0.75	649.5	644.5	624.5
	0.751	648	646.5	622.5
	0.752	645.5	644.5	625.5
	0.753	646	646	628
	0.754	646	644.5	627
	0.755	647	645.5	626.5
	0.756	647	646	626
	0.757	645.5	645	625.5
	0.758	648.5	644.5	628.5
	0.759	648	644.5	625
	0.76	646	643	627
	0.761	649.5	644	630.5
	0.762	648.5	643	629
	0.763	645.5	643.5	629.5
	0.764	647.5	644.5	634.5
	0.765	647.5	643.5	636
	0.766	649.5	642	637.5
	0.767	650	641.5	636
	0.768	650.5	644	638
	0.769	647.5	643	638
	0.77	652	646.5	642
	0.771	647	644.5	641.5
	0.772	646	642	642
	0.773	648	642	644
	0.774	649.5	643	644.5
	0.775	647	641.5	643.5
	0.776	645.5	642	646.5
	0.777	648	636.5	646.5
	0.778	648.5	642.5	648
	0.779	641.5	640.5	648
	0.78	650.5	637	651.5
	0.781	646	643.5	650
	0.782	650.5	637.5	656
	0.783	649.5	639.5	650
	0.784	647	638	656
	0.785	647	638.5	658.5
	0.786	649.5	641	658
	0.787	648.5	642.5	658
	0.788	652	640	656.5
	0.789	649.5	639	656.5
	0.79	649.5	640	658
	0.791	646.5	638.5	661.5
	0.792	648.5	639	662
	0.793	646.5	641.5	663.5
	0.794	649	640	661.5
	0.795	649	637	662.5
	0.796	648	639.5	663.5
	0.797	649.5	642	663.5
	0.798	646.5	642	665.5
	0.799	647.5	638.5	665
	0.8	649.5	639.5	664
	0.801	645	639	666
	0.802	646	638	667.5
	0.803	648	640	663.5
	0.804	649	640	666.5
	0.805	650.5	641	668
	0.806	646.5	639	670
	0.807	648.5	638.5	668
	0.808	645.5	640.5	666.5
	0.809	650	639	664.5
	0.81	645.5	637.5	667.5
	0.811	648	640.5	668.5
	0.812	645.5	641.5	670
	0.813	643.5	640	669
	0.814	650	642.5	669
	0.815	649.5	640	664.5
	0.816	648	641	667.5
	0.817	649	641	667
	0.818	647.5	638.5	667
	0.819	647	643	667.5
	0.82	649	640	663.5
	0.821	652	639.5	663.5
	0.822	649.5	641.5	666.5
	0.823	650.5	640	662
	0.824	649.5	641	665.5
	0.825	647.5	640	663.5
	0.826	645.5	640.5	667
	0.827	649.5	642	664
	0.828	649	639	661.5
	0.829	645.5	642	663.5
	0.83	650.5	641.5	661
	0.831	650.5	637.5	663
	0.832	646.5	641.5	658.5
	0.833	650.5	640.5	659.5
	0.834	649.5	640	654.5
	0.835	649.5	644	659.5
	0.836	651.5	641.5	656.5
	0.837	649	643	654
	0.838	649	643	658
	0.839	650	643	654.5
	0.84	647	642.5	653
	0.841	651.5	642	658.5
	0.842	646.5	645	655
	0.843	649.5	648	653
	0.844	649.5	641.5	653.5
	0.845	648	645	649.5
	0.846	648.5	643	655.5
	0.847	650.5	645.5	653
	0.848	650	642	651.5
	0.849	650.5	645.5	651
	0.85	648.5	643.5	651.5
	0.851	649.5	642	649.5
	0.852	649.5	643.5	647.5
	0.853	650.5	645	646
	0.854	650.5	644.5	649
	0.855	648.5	642	649
	0.856	646.5	644	647
	0.857	646	644.5	646.5
	0.858	649.5	646.5	648
	0.859	649.5	643.5	646.5
	0.86	646.5	643	645.5
	0.861	649.5	645.5	645.5
	0.862	648.5	645	643
	0.863	651	644	645.5
	0.864	650.5	644.5	643
	0.865	653	648	643.5
	0.866	649	641.5	642
	0.867	649.5	647	642.5
	0.868	647.5	643	644.5
	0.869	652	646	638.5
	0.87	650	644.5	642.5
	0.871	650.5	646.5	640
	0.872	647	642.5	640
	0.873	648.5	641.5	642.5
	0.874	649.5	644	640.5
	0.875	650	643.5	643
	0.876	647	645	640.5
	0.877	648.5	645	639
	0.878	648.5	643	639.5
	0.879	649.5	646	637.5
	0.88	649	644	635
	0.881	647.5	643.5	636.5
	0.882	649.5	644	636
	0.883	649.5	642.5	638
	0.884	646	643	636
	0.885	647.5	643	634.5
	0.886	649.5	643.5	637
	0.887	651.5	646	636
	0.888	648.5	645	638
	0.889	650.5	647	634
	0.89	649	646	635
	0.891	651	643	636
	0.892	649.5	644.5	639
	0.893	648.5	644	636.5
	0.894	649.5	642.5	642
	0.895	650	647.5	638.5
	0.896	650.5	645	637
	0.897	649	646.5	638
	0.898	649	644.5	637
	0.899	645	647.5	638
	0.9	648	644.5	638
	0.901	650	644	638
	0.902	653	645.5	634
	0.903	647	649	639
	0.904	650.5	649	638.5
	0.905	649	647.5	636.5
	0.906	650	645.5	639
	0.907	651	651	636
	0.908	649.5	645.5	637
	0.909	653	648.5	637.5
	0.91	649.5	646	638.5
	0.911	649	648.5	637.5
	0.912	650	651.5	638
	0.913	650.5	644	642
	0.914	647.5	649.5	636.5
	0.915	653	649	637.5
	0.916	649.5	651	636
	0.917	648.5	650	640.5
	0.918	650.5	650	636
	0.919	648	649	640
	0.92	650.5	647.5	641
	0.921	650	649.5	636
	0.922	647.5	649.5	640.5
	0.923	653.5	650	638.5
	0.924	649	649.5	639.5
	0.925	645	648.5	638
	0.926	645.5	651.5	638.5
	0.927	650.5	648.5	643
	0.928	646.5	652	639.5
	0.929	652.5	648	637.5
	0.93	648.5	651	639
	0.931	650.5	649.5	639
	0.932	650.5	648.5	639
	0.933	650	649.5	639.5
	0.934	651.5	648	641.5
	0.935	648	646.5	641
	0.936	646	645.5	642
	0.937	648	649	642
	0.938	651.5	647.5	641
	0.939	649.5	647.5	643
	0.94	650	647.5	646
	0.941	648.5	648.5	643
	0.942	650	651	643
	0.943	646.5	646	645.5
	0.944	648	648	642
	0.945	650	649.5	644.5
	0.946	649.5	650.5	644.5
	0.947	648	648	645.5
	0.948	647.5	648.5	643
	0.949	648	649.5	645.5
	0.95	647	648	646
	0.951	649	648.5	645
	0.952	651.5	647.5	642
	0.953	645	644	643
	0.954	645.5	648.5	644.5
	0.955	643	646.5	647.5
	0.956	646	649	645.5
	0.957	648.5	647	648.5
	0.958	645.5	647	643
	0.959	646.5	646.5	643
	0.96	645.5	649	644
	0.961	647.5	649.5	644
	0.962	649.5	644.5	643.5
	0.963	645	646.5	647
	0.964	648	647.5	643.5
	0.965	646.5	651	644.5
	0.966	648.5	648.5	643.5
	0.967	646.5	648	645.5
	0.968	647	649	645
	0.969	643	646.5	641
	0.97	646.5	649	644.5
	0.971	646	647	641
	0.972	643	647.5	646.5
	0.973	646.5	647	642.5
	0.974	648.5	645	642
	0.975	642.5	645.5	643
	0.976	643	646.5	646.5
	0.977	646	651	640
	0.978	645	645.5	643.5
	0.979	648	649	640
	0.98	646.5	647.5	643
	0.981	645.5	649.5	640
	0.982	646.5	644.5	643
	0.983	644.5	645.5	641
	0.984	647	645	641.5
	0.985	646	642	640.5
	0.986	647	645.5	638.5
	0.987	649.5	648.5	644
	0.988	648	645	644
	0.989	647.5	645	640
	0.99	648.5	644.5	638
	0.991	648.5	648	638
	0.992	645.5	645.5	640.5
	0.993	650.5	646	640
	0.994	651	645.5	636.5
	0.995	648.5	640.5	642.5
	0.996	651	643	637.5
	0.997	649.5	645	639.5
	0.998	650.5	641.5	638.5
	0.999	653	643	639
	1	647	644	639.5
	1.001	647	643	637
	1.002	649.5	643.5	639.5
	1.003	646.5	644	640
	1.004	651	642	636
	1.005	652	641	633.5
	1.006	652	643	637
	1.007	648.5	646.5	640
	1.008	651.5	644	635.5
	1.009	650.5	642.5	636.5
	1.01	649	647	639
	1.011	648.5	641.5	635.5
	1.012	649	643	637
	1.013	648	645.5	636
	1.014	648	645.5	636.5
	1.015	648	644	638.5
	1.016	647	643.5	633.5
	1.017	649	643	637
	1.018	649.5	643	637
	1.019	647.5	644	636
	1.02	649	642	639
	1.021	649.5	644.5	638
	1.022	645.5	643.5	635.5
	1.023	649	643.5	640
	1.024	649.5	642.5	637.5
	1.025	649.5	645.5	638.5
	1.026	647	642	637
	1.027	647.5	644	638.5
	1.028	648	644.5	640.5
	1.029	646	644.5	639
	1.03	647.5	644	639.5
	1.031	645.5	646	638
	1.032	645.5	643	642
	1.033	646	642	642
	1.034	645.5	644	643.5
	1.035	647.5	644	642.5
	1.036	647.5	640.5	639.5
	1.037	647.5	645	641
	1.038	648.5	645.5	640.5
	1.039	645	643	638.5
	1.04	649	640	642
	1.041	645.5	644	645
	1.042	646	645	641
	1.043	644	646	641.5
	1.044	648.5	642	639.5
	1.045	646	646	645.5
	1.046	648	647.5	643
	1.047	647	644.5	644.5
	1.048	649.5	645	642
	1.049	646.5	644	643
	1.05	645.5	647.5	645.5
	1.051	644.5	643.5	647
	1.052	645	645	644.5
	1.053	650	644.5	646.5
	1.054	647	647.5	643.5
	1.055	645	642	645
	1.056	645	642.5	643.5
	1.057	645	644.5	648.5
	1.058	647	643.5	644.5
	1.059	645.5	645	647
	1.06	647	643	643.5
	1.061	643.5	644.5	644.5
	1.062	650	645.5	645.5
	1.063	645.5	640.5	645
	1.064	648.5	640	645.5
	1.065	647.5	643	647.5
	1.066	648.5	642	644
	1.067	648.5	645	642.5
	1.068	649.5	645.5	644
	1.069	649.5	643	645.5
	1.07	646	649	642
	1.071	647.5	643	646.5
	1.072	648	645	646
	1.073	650	641	644.5
	1.074	646.5	639	644
	1.075	647.5	644.5	647.5
	1.076	648	642.5	646.5
	1.077	647.5	643.5	645.5
	1.078	649.5	643	646
	1.079	649	644.5	644.5
	1.08	646	648	647
	1.081	649.5	643.5	646.5
	1.082	648.5	645.5	645.5
	1.083	645	642	649.5
	1.084	649	645	646.5
	1.085	648.5	644.5	648.5
	1.086	649.5	643.5	646
	1.087	649.5	647	644
	1.088	649.5	643.5	645.5
	1.089	647.5	644	645.5
	1.09	649	643	647.5
	1.091	646.5	646	643
	1.092	652	643	646.5
	1.093	648	643.5	646.5
	1.094	648.5	642	645.5
	1.095	647.5	641.5	644.5
	1.096	647.5	647	646
	1.097	646	640.5	645
	1.098	647.5	641.5	645
	1.099	648.5	643	647
	1.1	647	642	645.5
	1.101	649.5	643.5	647.5
	1.102	649	649	648.5
	1.103	647.5	643.5	647.5
	1.104	646	645.5	649.5
	1.105	651	640	645.5
	1.106	653	646.5	643
	1.107	651.5	647	647
	1.108	646	645.5	646
	1.109	650	643	643.5
	1.11	646.5	646	646.5
	1.111	645.5	643	642
	1.112	648.5	642	645.5
	1.113	650	647	646
	1.114	649.5	646	647
	1.115	648	644.5	641
	1.116	652	643.5	646.5
	1.117	652	644	645.5
	1.118	648.5	646	645
	1.119	651	643	646.5
	1.12	649.5	645.5	645.5
	1.121	645.5	643	642
	1.122	648	647	644.5
	1.123	649.5	644	647
	1.124	649.5	646	644.5
	1.125	649.5	646.5	645
	1.126	650	644.5	643
	1.127	648.5	646.5	646
	1.128	645.5	644.5	644
	1.129	648	643.5	642
	1.13	646.5	645	644
	1.131	649	646	645.5
	1.132	648.5	648.5	645.5
	1.133	651	643	643
	1.134	647.5	649.5	642
	1.135	647.5	644	645.5
	1.136	646	644	646
	1.137	648	644	645
	1.138	649	643.5	646.5
	1.139	649	645.5	645
	1.14	649	645	646
	1.141	648	646	646
	1.142	645	645.5	645.5
	1.143	649.5	643.5	642
	1.144	652	645.5	643.5
	1.145	644.5	645	649
	1.146	649	644	645.5
	1.147	648.5	649.5	644.5
	1.148	649.5	643	644.5
	1.149	646.5	647.5	643
	1.15	646.5	645.5	645.5
	1.151	649	643	646.5
	1.152	646.5	643.5	649
	1.153	647	640	645
	1.154	648.5	646	644.5
	1.155	648	644.5	647.5
	1.156	648.5	648	646
	1.157	649	642.5	648.5
	1.158	649.5	646.5	646.5
	1.159	649.5	646	648
	1.16	649.5	644	646
	1.161	649.5	644	649
	1.162	649.5	646	645.5
	1.163	650	645	649.5
	1.164	651	646.5	649
	1.165	649.5	644.5	649.5
	1.166	649.5	641	650
	1.167	649.5	646	650
	1.168	652	647	649
	1.169	647.5	645.5	649.5
	1.17	647.5	647.5	647.5
	1.171	647.5	647.5	652
	1.172	652.5	646	650
	1.173	649.5	647	650.5
	1.174	649	644	649.5
	1.175	652.5	646	653.5
	1.176	650	646	652.5
	1.177	650.5	648	653
	1.178	649.5	647.5	652
	1.179	651	644.5	656.5
	1.18	651	646	652.5
	1.181	652	645.5	653
	1.182	651.5	646.5	653.5
	1.183	652.5	641	656.5
	1.184	650	645	656.5
	1.185	654	644	656
	1.186	652	646.5	656.5
	1.187	653	645.5	660.5
	1.188	649.5	640	660
	1.189	649.5	644	658.5
	1.19	652	643	659.5
	1.191	654	644.5	659
	1.192	653	643	661
	1.193	649	640.5	659.5
	1.194	647.5	645	663.5
	1.195	652	645.5	659
	1.196	649.5	642	662.5
	1.197	653	644	663.5
	1.198	651.5	644.5	662.5
	1.199	649.5	643.5	662.5
	1.2	649.5	640.5	662.5
	1.201	653	644.5	662
	1.202	648	641.5	660.5
	1.203	649.5	644.5	662.5
	1.204	647.5	643.5	661.5
	1.205	650	642	660
	1.206	648	644.5	657
	1.207	650.5	643	659
	1.208	649	643	659.5
	1.209	647	643	658
	1.21	648.5	642.5	658.5
	1.211	648	643.5	655
	1.212	649.5	643.5	656.5
	1.213	649.5	644	655.5
	1.214	645	643.5	654.5
	1.215	648.5	642	654
	1.216	646.5	643	652.5
	1.217	648	641	655
	1.218	649.5	641	653
	1.219	644.5	640.5	653.5
	1.22	648	643	651
	1.221	646.5	641	653.5
	1.222	644	640	650
	1.223	646.5	640	647.5
	1.224	647	643	644.5
	1.225	645.5	642	648.5
	1.226	644	642	646
	1.227	644	645	648.5
	1.228	646.5	639	644.5
	1.229	644.5	643	643
	1.23	646	643	643.5
	1.231	643	641.5	641.5
	1.232	648	642	642
	1.233	645.5	644	643.5
	1.234	645	640	642
	1.235	644.5	641.5	643
	1.236	645	643.5	643
	1.237	642	642	641
	1.238	646.5	638	636
	1.239	645	642	638.5
	1.24	646	643	636
	1.241	647	639.5	637
	1.242	648	641.5	636
	1.243	647.5	644.5	639.5
	1.244	645.5	641	636.5
	1.245	644.5	639.5	634
	1.246	645.5	642	634.5
	1.247	646.5	645	637
	1.248	647.5	640	633.5
	1.249	649	640	637.5
	1.25	647	642	637.5
	1.251	647.5	643	641
	1.252	644	642.5	636
	1.253	645.5	644.5	639.5
	1.254	645.5	642	639.5
	1.255	648	643.5	636.5
	1.256	644	642	636
	1.257	647	641	639
	1.258	646.5	643	635
	1.259	649.5	643	636
	1.26	646	643	636.5
	1.261	645.5	643	635.5
	1.262	647	642	635.5
	1.263	649.5	645	631.5
	1.264	649	642	634
	1.265	645.5	638	634
	1.266	644	643	634.5
	1.267	647	643.5	636
	1.268	646	643	633
	1.269	647.5	643	634.5
	1.27	644.5	648	636
	1.271	646	640	633.5
	1.272	646	640.5	634.5
	1.273	649.5	644.5	635
	1.274	647.5	641.5	634.5
	1.275	646.5	640.5	634.5
	1.276	644	641.5	632.5
	1.277	641.5	644.5	633.5
	1.278	643	642	634
	1.279	643	642.5	633.5
	1.28	645	642	632
	1.281	647	642	632.5
	1.282	644.5	644	633.5
	1.283	645	642	634
	1.284	643.5	644.5	632.5
	1.285	643	641	630.5
	1.286	642	644.5	632.5
	1.287	643	646.5	632.5
	1.288	646.5	644	635.5
	1.289	642.5	645.5	631.5
	1.29	645	639.5	632
	1.291	643	644.5	634.5
	1.292	643.5	644	632.5
	1.293	644.5	643	631
	1.294	644.5	643	636
	1.295	643.5	645.5	633.5
	1.296	644	644.5	633.5
	1.297	645	643	636
	1.298	642	643.5	632
	1.299	644.5	644.5	633.5
	1.3	643	643.5	632.5
	1.301	645.5	645	634
	1.302	648	643.5	634.5
	1.303	646.5	646	636
	1.304	647	645.5	636
	1.305	648	643	636
	1.306	645.5	647.5	636
	1.307	643.5	645	635
	1.308	646.5	647.5	635
	1.309	645.5	647	633
	1.31	644.5	646	634
	1.311	646.5	643.5	636.5
	1.312	645.5	647.5	637.5
	1.313	645.5	643	636
	1.314	647.5	644.5	640
	1.315	647	647	638
	1.316	646.5	647.5	638.5
	1.317	645.5	645.5	638
	1.318	649.5	644.5	640
	1.319	646	645	633.5
	1.32	646.5	646.5	638
	1.321	648.5	644.5	637
	1.322	645.5	648.5	641.5
	1.323	647	644	640
	1.324	645.5	644.5	638
	1.325	648	642	638.5
	1.326	645	645.5	639
	1.327	647	644.5	638.5
	1.328	649.5	642	640.5
	1.329	650	645.5	639
	1.33	647	644	642
	1.331	645.5	645.5	643
	1.332	644	642.5	638.5
	1.333	647.5	643	640.5
	1.334	648.5	644	641
	1.335	648.5	641	639
	1.336	645	645.5	640.5
	1.337	649	646	638.5
	1.338	645	644	643.5
	1.339	649.5	643	642
	1.34	647.5	646.5	641
	1.341	648	644	641
	1.342	647.5	643	641.5
	1.343	644	645.5	642
	1.344	650	641.5	641
	1.345	646.5	640.5	639
	1.346	649	641.5	643
	1.347	647	644	642
	1.348	647	644.5	639
	1.349	645.5	642	636.5
	1.35	645.5	640.5	638
	1.351	646	640	637
	1.352	648.5	643.5	635.5
	1.353	642.5	643	637.5
	1.354	647	644	634.5
	1.355	647	644.5	638
	1.356	645.5	644	639
	1.357	646.5	645	637
	1.358	646.5	642	636
	1.359	642	641	638
	1.36	648	645	639
	1.361	645	647	634.5
	1.362	646	643	634.5
	1.363	647.5	643.5	636
	1.364	647.5	643	633
	1.365	649.5	643.5	637
	1.366	648	642	632
	1.367	646.5	643	634.5
	1.368	649.5	643	629
	1.369	648	641.5	633.5
	1.37	649	641	629
	1.371	648.5	643	629
	1.372	648.5	642.5	627
	1.373	649.5	643	626
	1.374	647	639.5	624.5
	1.375	647	643	624.5
	1.376	649.5	644	622.5
	1.377	648	642	619.5
	1.378	651	642	621
	1.379	648.5	642	617.5
	1.38	649.5	644.5	614.5
	1.381	649.5	641.5	617
	1.382	647	643	615
	1.383	649.5	643	613
	1.384	651	641.5	609
	1.385	650.5	645.5	612
	1.386	650.5	643.5	605.5
	1.387	650	641.5	608.5
	1.388	652.5	641	604
	1.389	649	639.5	602.5
	1.39	649.5	642.5	601.5
	1.391	651	644	595.5
	1.392	651	643	597
	1.393	649.5	645	593
	1.394	649.5	642	588.5
	1.395	652	645.5	585
	1.396	651	646	581
	1.397	652	643.5	580
	1.398	653	646	575.5
	1.399	656	643	574.5
	1.4	650	648	571
	1.401	649.5	643	569.5
	1.402	649.5	643	565.5
	1.403	648.5	647	560
	1.404	649.5	647.5	556.5
	1.405	650	645.5	557.5
	1.406	653	645.5	549.5
	1.407	651	646	548.5
	1.408	653	649	540.5
	1.409	650.5	649.5	540
	1.41	651	646.5	539.5
	1.411	649	646.5	532
	1.412	650	647	529
	1.413	649.5	649	526
	1.414	651	650	522
	1.415	651.5	646	515
	1.416	653	647	512
	1.417	652.5	646.5	506
	1.418	651	646.5	502.5
	1.419	644.5	645.5	498
	1.42	647.5	648.5	496.5
	1.421	648.5	649.5	486.5
	1.422	648	648	480.5
	1.423	648.5	646.5	477.5
	1.424	649	648.5	471.5
	1.425	648.5	648	464.5
	1.426	649	648.5	461.5
	1.427	651.5	650.5	453.5
	1.428	650	643.5	451
	1.429	651.5	648	444
	1.43	648.5	648.5	438
	1.431	648.5	650	434
	1.432	650	647	429
	1.433	649.5	649	420
	1.434	652	645.5	419
	1.435	650.5	644.5	412.5
	1.436	648.5	649.5	407.5
	1.437	645.5	649.5	402.5
	1.438	652.5	652	394.5
	1.439	649	647.5	389.5
	1.44	649.5	648.5	384
	1.441	649	649.5	375.5
	1.442	647.5	649.5	372.5
	1.443	651	646.5	365.5
	1.444	649	645	357.5
	1.445	650	649	350.5
	1.446	649	648	346
	1.447	645.5	644.5	341.5
	1.448	650	647	334
	1.449	645.5	648	327.5
	1.45	647.5	645	321
	1.451	648	646.5	309.5
	1.452	648.5	647	304.5
	1.453	649.5	647	296.5
	1.454	647.5	648.5	294
	1.455	646.5	646	281.5
	1.456	648	646.5	277
	1.457	646.5	644.5	268
	1.458	646	647	267.5
	1.459	648	646	257.5
	1.46	647	644.5	253
	1.461	647	647	244.5
	1.462	649.5	643.5	239.5
	1.463	643.5	646.5	232
	1.464	647.5	644	229
	1.465	648	646.5	223.5
	1.466	648.5	648	215
	1.467	647	643	208
	1.468	646	646.5	204
	1.469	648.5	648	200
	1.47	646	645	194
	1.471	648	644	187.5
	1.472	647.5	645.5	183
	1.473	647.5	646.5	180.5
	1.474	645	649.5	171
	1.475	649.5	648	168
	1.476	648.5	643.5	160.5
	1.477	647.5	649	156
	1.478	648.5	643	152.5
	1.479	647	647	147
	1.48	644.5	648.5	145
	1.481	644	648.5	137
	1.482	647	643	135
	1.483	647.5	644.5	128
	1.484	647	643	125.5
	1.485	647	647	123
	1.486	646.5	646.5	119.5
	1.487	648.5	646	114
	1.488	649	647	110.5
	1.489	645	646	106
	1.49	649	646	104.5
	1.491	647.5	644	99.5
	1.492	647	648.5	96.5
	1.493	646	645.5	94
	1.494	645	647.5	92
	1.495	647.5	644	88.5
	1.496	644	644	87
	1.497	646.5	645.5	80.5
	1.498	646	646.5	80.5
	1.499	644	644	77.5
	1.5	648	648	78.5
	1.501	645.5	645.5	77.5
	1.502	647.5	646	70
	1.503	647	645.5	73.5
	1.504	643.5	648.5	68
	1.505	648	644	69.5
	1.506	646.5	647	65.5
	1.507	647.5	647.5	64.5
	1.508	646.5	645.5	65.5
	1.509	646.5	643	66
	1.51	643.5	646	62
	1.511	647	648	61
	1.512	646	646.5	61
	1.513	647.5	645.5	61.5
	1.514	648	644.5	64
	1.515	647	645.5	61
	1.516	647.5	645	62
	1.517	644	646	61.5
	1.518	646	645.5	61
	1.519	647.5	644	60.5
	1.52	647.5	644	59.5
	1.521	644.5	643.5	59.5
	1.522	643.5	645.5	63
	1.523	648.5	643	60.5
	1.524	644.5	642	60
	1.525	647	643.5	63
	1.526	646.5	645.5	64.5
	1.527	645	642	65
	1.528	647.5	641.5	63
	1.529	648	641	62
	1.53	647	643	64
	1.531	647	644.5	67.5
	1.532	650	644	67
	1.533	651	644	68
	1.534	648	644	71.5
	1.535	645	640.5	73.5
	1.536	647	644.5	76
	1.537	647	642.5	74.5
	1.538	652.5	645	76
	1.539	649.5	643.5	80.5
	1.54	648.5	643.5	80
	1.541	649.5	644.5	83.5
	1.542	649.5	645	84.5
	1.543	646.5	642	85
	1.544	649.5	643	93
	1.545	649.5	646.5	88.5
	1.546	650	645.5	93.5
	1.547	651.5	640	97
	1.548	649.5	643.5	94
	1.549	649.5	646	102.5
	1.55	648.5	643.5	104
	1.551	649.5	643.5	106.5
	1.552	649.5	645	107.5
	1.553	649.5	648.5	110.5
	1.554	648.5	646.5	114
	1.555	650	645	117
	1.556	652	644	121.5
	1.557	645.5	641	123.5
	1.558	648.5	644.5	123
	1.559	650.5	642.5	129.5
	1.56	650	644	131.5
	1.561	649	646.5	133
	1.562	648	647	137
	1.563	646.5	644.5	140
	1.564	649.5	643.5	143.5
	1.565	650	645.5	149.5
	1.566	648.5	644	149.5
	1.567	654	645	154
	1.568	647	644.5	160
	1.569	653.5	644	162
	1.57	650.5	643	165.5
	1.571	647.5	643	169.5
	1.572	649.5	645.5	173
	1.573	649.5	643	175
	1.574	649.5	644.5	183.5
	1.575	649.5	643.5	180.5
	1.576	647	645.5	190
	1.577	648.5	644.5	196.5
	1.578	648	642	197
	1.579	649.5	648	205.5
	1.58	652	643	202
	1.581	648.5	643	212
	1.582	646.5	643	218.5
	1.583	649.5	642	223.5
	1.584	647	643.5	229
	1.585	650.5	640	233.5
	1.586	650.5	646.5	235.5
	1.587	647	640.5	242.5
	1.588	651.5	647	245
	1.589	649.5	640.5	251
	1.59	646	642.5	256.5
	1.591	649.5	642	263
	1.592	649	643	264
	1.593	648	646.5	273
	1.594	650.5	643	275
	1.595	644.5	641	280
	1.596	649.5	644	282.5
	1.597	650	643.5	287.5
	1.598	647.5	643	293.5
	1.599	649.5	644.5	299
	1.6	646.5	643	304
	1.601	647.5	642.5	307.5
	1.602	649	646	315.5
	1.603	649.5	644	318.5
	1.604	647	643	325.5
	1.605	648	646	328
	1.606	653	648	334.5
	1.607	647	648	339.5
	1.608	647	649	344
	1.609	644	644.5	351
	1.61	648	645	351
	1.611	649.5	646	363
	1.612	645.5	646.5	369
	1.613	649	643.5	371.5
	1.614	647.5	646	377.5
	1.615	645.5	648.5	386.5
	1.616	647	645	391
	1.617	647	644	397.5
	1.618	646.5	645	402
	1.619	648.5	646.5	410
	1.62	646	644.5	419
	1.621	647.5	645.5	423
	1.622	649.5	646	432
	1.623	647	645	434
	1.624	648	642.5	443.5
	1.625	646.5	645.5	446.5
	1.626	644.5	649	451.5
	1.627	647	646.5	457.5
	1.628	646	646.5	464
	1.629	649	649.5	483.5
	1.63	648	646	470.5
	1.631	643.5	644.5	491
	1.632	649	644.5	486
	1.633	644.5	642.5	496
	1.634	647	645.5	492.5
	1.635	646	645	498
	1.636	644.5	644.5	500
	1.637	648	645	500.5
	1.638	645	643	501.5
	1.639	646	646.5	509.5
	1.64	646	642.5	519
	1.641	643.5	645.5	524
	1.642	644.5	644	532
	1.643	643.5	646	537.5
	1.644	649	645.5	548.5
	1.645	646	644	550
	1.646	645.5	647.5	558
	1.647	643.5	644.5	567.5
	1.648	645	644	572
	1.649	645.5	643	578
	1.65	645.5	641	586
	1.651	643	642	588
	1.652	649.5	640.5	595
	1.653	647	642	610
	1.654	645.5	645	620.5
	1.655	645.5	645	627
	1.656	648	646	636.5
	1.657	646	644.5	649.5
	1.658	644	642	654.5
	1.659	645	645	668
	1.66	647	643	675.5
	1.661	645.5	645.5	686
	1.662	645	643	694
	1.663	648	644.5	704
	1.664	647.5	643.5	711
	1.665	647.5	641.5	722
	1.666	646	645.5	733
	1.667	645.5	644	742
	1.668	646	645.5	752
	1.669	648	642.5	762.5
	1.67	649.5	641.5	769.5
	1.671	644.5	641.5	780
	1.672	648.5	642.5	791
	1.673	649.5	642	798
	1.674	646.5	644	808.5
	1.675	649.5	645.5	814
	1.676	648.5	644	822.5
	1.677	644	647	832.5
	1.678	646.5	642	837
	1.679	651	643.5	846.5
	1.68	648.5	643	857
	1.681	647.5	643.5	865.5
	1.682	650.5	643	865.5
	1.683	649.5	644	878.5
	1.684	649.5	644.5	885.5
	1.685	649.5	645.5	891.5
	1.686	646.5	644	899
	1.687	649	643	907.5
	1.688	649	642.5	910
	1.689	648	643.5	917
	1.69	650	642	925
	1.691	652	644	932
	1.692	650	645	934
	1.693	652	642	940
	1.694	645.5	643.5	943.5
	1.695	655.5	643	948
	1.696	654	643	951
	1.697	649.5	643	956
	1.698	653	643.5	957.5
	1.699	650	645	964
	1.7	649	641.5	964.5
	1.701	650	644	970
	1.702	652	641.5	974.5
	1.703	651	643.5	976.5
	1.704	650.5	646.5	980.5
	1.705	648.5	640.5	984.5
	1.706	649.5	641	983.5
	1.707	652	645	990.5
	1.708	650.5	643	993.5
	1.709	650	643	995
	1.71	649.5	642	998.5
	1.711	651.5	644	1001.5
	1.712	648	643	1003
	1.713	649.5	640.5	1007
	1.714	649.5	644	1007
	1.715	648.5	648	1011
	1.716	649.5	643.5	1012
	1.717	653.5	643.5	1014
	1.718	650.5	644	1014.5
	1.719	651.5	643	1019.5
	1.72	650	644.5	1022
	1.721	649.5	644.5	1022
	1.722	650.5	644.5	1032
	1.723	651	646	1028.5
	1.724	647	647	1033
	1.725	651.5	645	1038.5
	1.726	651	645.5	1044.5
	1.727	649.5	645	1049
	1.728	649	643.5	1051.5
	1.729	649.5	645	1055.5
	1.73	649.5	645	1064
	1.731	649.5	646	1070
	1.732	649.5	644	1076
	1.733	649.5	644.5	1079
	1.734	648.5	645.5	1087.5
	1.735	649.5	645.5	1088.5
	1.736	650.5	646	1097
	1.737	647	646.5	1104
	1.738	652	647	1110
	1.739	650	645.5	1118
	1.74	648.5	645.5	1122.5
	1.741	649.5	645.5	1128.5
	1.742	648.5	646	1131.5
	1.743	648.5	647.5	1139.5
	1.744	648	643	1144
	1.745	646.5	648.5	1149
	1.746	649	646	1155
	1.747	649	645	1161.5
	1.748	651	646.5	1163.5
	1.749	648.5	643	1163.5
	1.75	649	643	1169.5
	1.751	648	644.5	1177.5
	1.752	651	648.5	1178.5
	1.753	648.5	647	1183.5
	1.754	649.5	647	1185.5
	1.755	648	643	1186
	1.756	649.5	647	1191.5
	1.757	647	645	1196.5
	1.758	650	647.5	1198.5
	1.759	648	648.5	1197
	1.76	646.5	647	1204.5
	1.761	651	647.5	1205.5
	1.762	647	643.5	1207.5
	1.763	648	645.5	1210.5
	1.764	648.5	644	1213.5
	1.765	648	646.5	1214
	1.766	647.5	646.5	1215.5
	1.767	651	646	1217.5
	1.768	647.5	642	1217.5
	1.769	644.5	647	1221
	1.77	649	645	1221.5
	1.771	647	644	1223.5
	1.772	648.5	646.5	1228
	1.773	645	646	1230
	1.774	649	645	1233.5
	1.775	647.5	643.5	1236
	1.776	651	648	1238
	1.777	649	648.5	1247
	1.778	647	647.5	1243.5
	1.779	649.5	645.5	1250.5
	1.78	646.5	644	1252
	1.781	645	647	1258.5
	1.782	645.5	648.5	1261.5
	1.783	648	649.5	1265
	1.784	651.5	647	1272
	1.785	649.5	646	1272
	1.786	649	644.5	1276
	1.787	644.5	644.5	1283
	1.788	645.5	646.5	1283
	1.789	645	648.5	1283
	1.79	647.5	648.5	1289
	1.791	650	645	1297.5
	1.792	649	647.5	1298
	1.793	645.5	646	1301.5
	1.794	648	649.5	1303.5
	1.795	646.5	647.5	1310
	1.796	648	648	1315.5
	1.797	649.5	647.5	1318
	1.798	648	650.5	1320
	1.799	643.5	650	1327
	1.8	647	646.5	1330
	1.801	648.5	647.5	1334.5
	1.802	646	645	1339
	1.803	647	647	1342.5
	1.804	645	650.5	1342.5
	1.805	647.5	650	1351.5
	1.806	646	649.5	1356.5
	1.807	647.5	650.5	1361
	1.808	647.5	652	1364
	1.809	648.5	646.5	1368
	1.81	646.5	645.5	1372.5
	1.811	647	644.5	1379
	1.812	649.5	648.5	1382
	1.813	645	645.5	1385.5
	1.814	649	644	1392
	1.815	646	649.5	1397.5
	1.816	648.5	644.5	1400.5
	1.817	651	648.5	1402
	1.818	648	649.5	1415
	1.819	646.5	649.5	1416
	1.82	649	647.5	1422.5
	1.821	646.5	647.5	1428.5
	1.822	648.5	649.5	1429.5
	1.823	649	648	1437.5
	1.824	649	647.5	1443
	1.825	649.5	649	1450
	1.826	649.5	649	1453
	1.827	651	646.5	1460.5
	1.828	648.5	649	1462
	1.829	646	647.5	1469.5
	1.83	649.5	648.5	1473.5
	1.831	652	648.5	1477
	1.832	646.5	649	1481
	1.833	647.5	647	1484
	1.834	646.5	650	1487.5
	1.835	648.5	648.5	1491.5
	1.836	648.5	647.5	1491.5
	1.837	650	647.5	1491.5
	1.838	650	646	1499
	1.839	648	649.5	1502
	1.84	649.5	647.5	1506
	1.841	653.5	644.5	1506.5
	1.842	650	648.5	1506.5
	1.843	649.5	649.5	1514
	1.844	650.5	649	1517
	1.845	647	650.5	1519.5
	1.846	647.5	648	1520.5
	1.847	648.5	647	1521
	1.848	649.5	645	1521.5
	1.849	648	647	1521.5
	1.85	650	648	1532
	1.851	649.5	646	1527
	1.852	648.5	647	1529
	1.853	649.5	648	1532
	1.854	646.5	649	1534
	1.855	647	646.5	1532
	1.856	650.5	644	1536
	1.857	649.5	647	1534.5
	1.858	649.5	646	1533
	1.859	649.5	646	1533.5
	1.86	647.5	644.5	1536.5
	1.861	651	646.5	1534.5
	1.862	650	643	1536
	1.863	649	647.5	1532
	1.864	648	647	1532.5
	1.865	647.5	646	1532
	1.866	649	644	1530.5
	1.867	650.5	648.5	1528
	1.868	648.5	643.5	1529
	1.869	649.5	647.5	1528
	1.87	649.5	643	1521.5
	1.871	647	643.5	1521.5
	1.872	651.5	645	1521.5
	1.873	647	643.5	1517.5
	1.874	650.5	643.5	1519
	1.875	648	641.5	1514.5
	1.876	648.5	643.5	1510.5
	1.877	647.5	642	1506.5
	1.878	650	643	1506.5
	1.879	650	643.5	1506
	1.88	648	643	1506
	1.881	649.5	645.5	1506.5
	1.882	649	643	1502.5
	1.883	649.5	644	1500
	1.884	648	642	1498
	1.885	648.5	640.5	1497.5
	1.886	649.5	641.5	1491.5
	1.887	648	640	1491.5
	1.888	647.5	639	1491.5
	1.889	651	639	1491.5
	1.89	649.5	641	1491.5
	1.891	647	639.5	1487
	1.892	649.5	640	1487
	1.893	648.5	641.5	1484.5
	1.894	647.5	640.5	1481.5
	1.895	652.5	640	1477
	1.896	645.5	641.5	1473.5
	1.897	649.5	643	1470.5
	1.898	645.5	642	1469
	1.899	647.5	643	1471
	1.9	648	641	1462
	1.901	650.5	642.5	1462
	1.902	645.5	638.5	1462
	1.903	649	639	1458
	1.904	645.5	641.5	1456
	1.905	649	639	1458
	1.906	647	639	1456
	1.907	648.5	642	1452.5
	1.908	645.5	641.5	1447
	1.909	648.5	643.5	1446.5
	1.91	649	644	1447
	1.911	649.5	643.5	1447
	1.912	643	642	1442.5
	1.913	648	640	1442.5
	1.914	645	642.5	1443
	1.915	648	645	1436.5
	1.916	647	643	1435
	1.917	646.5	642	1435.5
	1.918	645.5	643.5	1431.5
	1.919	649.5	643	1429
	1.92	646	643.5	1428.5
	1.921	647.5	641	1428.5
	1.922	649	642	1427.5
	1.923	647.5	644	1427.5
	1.924	647	641	1417
	1.925	647.5	641	1417
	1.926	649.5	640.5	1417
	1.927	647.5	648.5	1416
	1.928	649.5	643	1411
	1.929	648	640	1409.5
	1.93	649.5	641	1409.5
	1.931	647	641.5	1409.5
	1.932	648.5	645	1402
	1.933	648	643.5	1402
	1.934	648.5	645	1402
	1.935	649	643	1399.5
	1.936	648	644.5	1401
	1.937	651	643	1398.5
	1.938	648	647.5	1401.5
	1.939	648	644	1395.5
	1.94	649.5	645.5	1397.5
	1.941	648	641	1399.5
	1.942	648.5	643	1397
	1.943	648	645.5	1398.5
	1.944	649.5	642	1402
	1.945	650	642	1401.5
	1.946	649.5	642	1401
	1.947	649.5	645	1400.5
	1.948	650	645.5	1402
	1.949	649	643	1398
	1.95	647	643.5	1401.5
	1.951	646.5	642.5	1401
	1.952	650	641.5	1401
	1.953	647.5	645.5	1401.5
	1.954	646.5	647	1400.5
	1.955	650	643	1401
	1.956	652	647.5	1400
	1.957	648.5	647	1400.5
	1.958	651.5	645	1399.5
	1.959	649	648	1402
	1.96	652.5	647	1402
	1.961	649.5	647.5	1402
	1.962	651	646.5	1402
	1.963	652.5	649.5	1401.5
	1.964	652.5	649	1402
	1.965	653	646.5	1409
	1.966	654.5	649	1409
	1.967	653.5	649.5	1409
	1.968	651.5	653	1413.5
	1.969	651	645.5	1415.5
	1.97	649.5	650	1417
	1.971	652.5	651	1417
	1.972	652	648.5	1417
	1.973	653	649.5	1417
	1.974	654.5	650	1421
	1.975	650.5	647.5	1427
	1.976	655.5	652	1429.5
	1.977	651.5	649	1432
	1.978	649.5	650	1429.5
	1.979	654	653	1436
	1.98	650	650.5	1432
	1.981	651.5	649.5	1439.5
	1.982	653	652	1439.5
	1.983	652.5	649	1445
	1.984	651	649.5	1446.5
	1.985	652	652	1447
	1.986	655	651.5	1447
	1.987	655	650.5	1447
	1.988	652.5	650.5	1456.5
	1.989	651	650	1454
	1.99	653.5	648.5	1456.5
	1.991	654.5	651	1462
	1.992	653.5	650.5	1462
	1.993	653	650	1462
[truncated: 6,006 more rows]

## Sheet: E
DataTypeVer2.0	Time	Fz	Fz	Fz
NumberOfData		8000	8000	8000
PreTriggerData		0	0	0
SamplingTime[ms]		1	1	1
DataLabel		E1:CMJ	E2:CMJ	E3:CMJ
DataUnit	sec	N	N	N
	0	700	697	696.5
	0.001	697.5	701	694
	0.002	698	700	692.5
	0.003	697	697.5	695.5
	0.004	695	698.5	697.5
	0.005	696.5	700	696.5
	0.006	696	700.5	697
	0.007	693.5	700	694
	0.008	694.5	695.5	691.5
	0.009	696.5	700	691.5
	0.01	698.5	699.5	695.5
	0.011	695.5	696.5	698
	0.012	697	701.5	695
	0.013	693.5	702	695.5
	0.014	697	699.5	694.5
	0.015	696	698.5	696
	0.016	696.5	700	692.5
	0.017	696	698	695.5
	0.018	697	700	691.5
	0.019	694	698.5	695.5
	0.02	698.5	699	695
	0.021	695.5	698.5	696.5
	0.022	698.5	695.5	691.5
	0.023	697.5	697.5	697.5
	0.024	695	693.5	695.5
	0.025	695.5	697.5	695
	0.026	702	698	694.5
	0.027	699	696	698.5
	0.028	697.5	696.5	696.5
	0.029	701.5	702	695.5
	0.03	695.5	694.5	696
	0.031	697.5	696	694
	0.032	697.5	697.5	696.5
	0.033	697.5	693.5	697.5
	0.034	699	699	695
	0.035	698.5	694.5	700
	0.036	697.5	698	694.5
	0.037	699	696	697
	0.038	698.5	693	697.5
	0.039	695.5	698	701.5
	0.04	697.5	695	697.5
	0.041	703	696	695
	0.042	700	698	699.5
	0.043	696	694.5	693.5
	0.044	696.5	696	693.5
	0.045	698.5	695.5	697.5
	0.046	698	697	697
	0.047	700	695.5	697
	0.048	698	695.5	698.5
	0.049	698.5	693.5	697
	0.05	698.5	695.5	696.5
	0.051	698.5	697	698.5
	0.052	697	690.5	697.5
	0.053	698.5	691.5	699
	0.054	697.5	693.5	698
	0.055	694.5	694.5	696.5
	0.056	698.5	696	697
	0.057	699.5	696	698.5
	0.058	698	693.5	697.5
	0.059	700.5	695	697
	0.06	697.5	695.5	698.5
	0.061	697.5	695	697.5
	0.062	701	693.5	698.5
	0.063	701	694.5	697
	0.064	697.5	697.5	699.5
	0.065	703	697	701
	0.066	697.5	694.5	699.5
	0.067	699	695	701
	0.068	699.5	694	700
	0.069	698.5	696.5	699
	0.07	698.5	695.5	698
	0.071	702	695	698
	0.072	700	694	697
	0.073	699	697.5	695
	0.074	697.5	696.5	699
	0.075	698.5	695.5	699
	0.076	697.5	700.5	697
	0.077	699.5	697.5	697.5
	0.078	703	698	698
	0.079	696.5	691.5	697.5
	0.08	701.5	697.5	698
	0.081	699.5	698	696.5
	0.082	701	698	697.5
	0.083	699.5	697.5	698
	0.084	697.5	695.5	699
	0.085	698.5	696.5	694
	0.086	699	695.5	700
	0.087	695.5	697	700
	0.088	699.5	691.5	696
	0.089	703.5	691.5	696.5
	0.09	702	698	696.5
	0.091	697	697.5	695.5
	0.092	702	696.5	697.5
	0.093	701	696.5	697.5
	0.094	700	697	701
	0.095	701	697	699
	0.096	702	697.5	699
	0.097	698.5	697.5	700
	0.098	699.5	697	697.5
	0.099	698.5	693	696
	0.1	703	691.5	700
	0.101	701.5	696	696
	0.102	700.5	697.5	700
	0.103	701.5	697	700.5
	0.104	702	697.5	696.5
	0.105	701	696.5	699
	0.106	704	696	700.5
	0.107	700	700	696.5
	0.108	699.5	698	699
	0.109	703	697	697
	0.11	698.5	698.5	701
	0.111	700.5	699	699.5
	0.112	700	701.5	696.5
	0.113	699	697.5	697.5
	0.114	699.5	700	699.5
	0.115	701	698	699.5
	0.116	702.5	700	701
	0.117	701.5	697	697
	0.118	702.5	695.5	698.5
	0.119	702	698.5	700
	0.12	698.5	698.5	697.5
	0.121	699.5	695.5	698.5
	0.122	702.5	696.5	701
	0.123	701	697.5	697
	0.124	700.5	698.5	696.5
	0.125	698.5	697.5	696.5
	0.126	699	699	695.5
	0.127	700.5	699	697.5
	0.128	699	698	700.5
	0.129	697.5	698.5	691.5
	0.13	700.5	696	697.5
	0.131	700	699	695.5
	0.132	701	697.5	694.5
	0.133	701	697.5	699.5
	0.134	702	696	698.5
	0.135	698.5	698.5	698.5
	0.136	699	698	696.5
	0.137	699.5	701	697
	0.138	699.5	700.5	697.5
	0.139	700.5	696	694
	0.14	700.5	695.5	697.5
	0.141	701	699	696
	0.142	699.5	701	699
	0.143	700.5	697.5	693.5
	0.144	699.5	701.5	699
	0.145	699.5	701	695.5
	0.146	704	700.5	696
	0.147	698.5	700.5	697.5
	0.148	700	700	696
	0.149	700.5	697.5	695.5
	0.15	699	701.5	695
	0.151	700	697.5	692.5
	0.152	700	699	694.5
	0.153	700	702.5	695
	0.154	701	697.5	695
	0.155	700	699	695
	0.156	702	697.5	696
	0.157	699	698.5	696.5
	0.158	699	697	693
	0.159	699	702.5	695.5
	0.16	700	699	691.5
	0.161	701.5	699	695
	0.162	697.5	699	698
	0.163	697.5	699	695
	0.164	702	700.5	695
	0.165	694	697.5	697.5
	0.166	695.5	698.5	696
	0.167	698	698	697.5
	0.168	704.5	699.5	695
	0.169	700	701.5	694
	0.17	700	697.5	701.5
	0.171	698.5	701	693.5
	0.172	697.5	701	695
	0.173	698.5	697	701
	0.174	701.5	700	697.5
	0.175	700.5	700.5	697.5
	0.176	698	697.5	698.5
	0.177	700	696.5	698
	0.178	700	702	697
	0.179	700.5	700.5	697
	0.18	698	699	698
	0.181	697.5	697.5	695.5
	0.182	699	701.5	696.5
	0.183	696	697.5	699
	0.184	696.5	696	698.5
	0.185	700.5	697	697.5
	0.186	696.5	697.5	697
	0.187	697	697	697
	0.188	699	699	701
	0.189	699	696.5	695.5
	0.19	699	697.5	701
	0.191	698.5	695.5	696.5
	0.192	697.5	698	698
	0.193	697	696.5	699
	0.194	699.5	698	699.5
	0.195	701	695.5	699.5
	0.196	700	697.5	697
	0.197	700	694.5	699.5
	0.198	704.5	693.5	695.5
	0.199	699.5	697.5	695.5
	0.2	702.5	700	701.5
	0.201	701	696.5	702
	0.202	698.5	696.5	699
	0.203	698.5	697.5	700
	0.204	697.5	697.5	696
	0.205	699.5	697	699
	0.206	699.5	700.5	697.5
	0.207	699	698	701
	0.208	699	697.5	697.5
	0.209	698	694	702.5
	0.21	697.5	696	696.5
	0.211	698	698.5	700
	0.212	697.5	698	700
	0.213	699.5	697	701
	0.214	701	697	695.5
	0.215	698	695	699.5
	0.216	697	697	701
	0.217	700.5	698.5	698
	0.218	702	697.5	699
	0.219	700	695.5	699.5
	0.22	701.5	699	697.5
	0.221	699	698	699
	0.222	699	700	697.5
	0.223	699	700.5	697
	0.224	698	697	697
	0.225	698.5	697.5	698.5
	0.226	700	695.5	696.5
	0.227	699	698.5	698.5
	0.228	699	700	699
	0.229	698	697.5	697
	0.23	698.5	697.5	700
	0.231	695.5	694.5	696.5
	0.232	700	698	701.5
	0.233	704	697.5	697.5
	0.234	701	696	699
	0.235	702	696	698
	0.236	702.5	697	701
	0.237	699.5	696.5	695
	0.238	702	695	698.5
	0.239	698	700	696.5
	0.24	703	694.5	697.5
	0.241	698	695.5	695.5
	0.242	699	693.5	699.5
	0.243	700.5	697.5	698.5
	0.244	699	694.5	695
	0.245	701.5	696	699
	0.246	702	697	696.5
	0.247	702.5	696	697
	0.248	701	693	697.5
	0.249	699.5	694.5	701
	0.25	698	694	701
	0.251	698.5	697.5	697.5
	0.252	697.5	696	697.5
	0.253	702.5	695.5	697.5
	0.254	701.5	695.5	696.5
	0.255	702	696	695.5
	0.256	700	694.5	697.5
	0.257	702	694.5	700
	0.258	702.5	695.5	697.5
	0.259	702	694	697.5
	0.26	700.5	693.5	697
	0.261	703	695	697.5
	0.262	703	691.5	694
	0.263	700.5	694.5	691.5
	0.264	701.5	695	691.5
	0.265	698	696.5	700
	0.266	698	691.5	698.5
	0.267	699	693	697
	0.268	698.5	695.5	693.5
	0.269	701	695.5	694.5
	0.27	701.5	691.5	695.5
	0.271	700.5	691.5	695.5
	0.272	698	696.5	696
	0.273	700	696	695.5
	0.274	700	694.5	698.5
	0.275	698	693.5	696
	0.276	699	693	696
	0.277	699	692	691
	0.278	704	695	696
	0.279	699	691.5	696.5
	0.28	704.5	697.5	694
	0.281	697.5	695.5	695
	0.282	700.5	695.5	694.5
	0.283	702.5	691.5	694.5
	0.284	701	694	695.5
	0.285	697.5	694.5	695.5
	0.286	698.5	694	696
	0.287	698.5	695	693.5
	0.288	700	697.5	700
	0.289	701	691.5	700.5
	0.29	701	691.5	695
	0.291	699	695	694
	0.292	703	694	693
	0.293	702.5	695.5	697.5
	0.294	697.5	695.5	696.5
	0.295	695	694.5	695
	0.296	697.5	697.5	694.5
	0.297	701	694	695
	0.298	703	695.5	697.5
	0.299	697.5	691	695.5
	0.3	700	696	699
	0.301	699.5	699	694.5
	0.302	699	696	697.5
	0.303	698.5	696.5	693.5
	0.304	698	697.5	694.5
	0.305	694	697.5	697.5
	0.306	696	696.5	695
	0.307	697.5	697.5	697.5
	0.308	696	697.5	696
	0.309	699	697	696
	0.31	697	697.5	699.5
	0.311	697.5	697.5	697.5
	0.312	697	699	700
	0.313	700.5	694	697.5
	0.314	697.5	702	699
	0.315	700	697.5	698
	0.316	697.5	697.5	700
	0.317	697.5	699.5	693.5
	0.318	695.5	696.5	697.5
	0.319	695.5	696.5	699.5
	0.32	702	699.5	698
	0.321	702.5	697.5	697
	0.322	693.5	697.5	696
	0.323	698	704.5	697.5
	0.324	696.5	693.5	699
	0.325	699.5	696	696.5
	0.326	697	698.5	697.5
	0.327	697.5	699.5	697.5
	0.328	699	697	697
	0.329	700	696.5	700.5
	0.33	695.5	699	697.5
	0.331	698.5	698	700
	0.332	699	696.5	699
	0.333	694.5	699	701
	0.334	700.5	696	696.5
	0.335	699	697.5	695
	0.336	696	700	697.5
	0.337	697.5	696.5	697
	0.338	698	701	700
	0.339	701	696.5	696
	0.34	697	698	698
	0.341	698	697	699.5
	0.342	697.5	700	696.5
	0.343	697.5	696.5	702
	0.344	698	695.5	698
	0.345	698.5	693	698
	0.346	699	697	699
	0.347	700.5	699	699
	0.348	698.5	696	697
	0.349	699.5	697	699
	0.35	700	697.5	697
	0.351	703	696.5	700
	0.352	700	691.5	697.5
	0.353	697.5	695.5	699
	0.354	698.5	695	696.5
	0.355	697.5	697.5	700
	0.356	698	698	699
	0.357	702	696	694
	0.358	698	697.5	695.5
	0.359	697	697.5	700.5
	0.36	698	693.5	699
	0.361	699	694	697.5
	0.362	700	697.5	696.5
	0.363	698	696.5	698.5
	0.364	704	693.5	697
	0.365	703.5	694.5	696
	0.366	698.5	697	697.5
	0.367	698.5	697	697
	0.368	700.5	694.5	695.5
	0.369	699	693.5	699.5
	0.37	698.5	695.5	699
	0.371	697.5	698	697
	0.372	699	697.5	697
	0.373	697.5	694	696
	0.374	699	694.5	696.5
	0.375	697.5	697	697
	0.376	697	697	694.5
	0.377	699.5	698	695.5
	0.378	700	697	697
	0.379	703	695	698
	0.38	699	693	694
	0.381	699	696.5	700
	0.382	696	698	698
	0.383	702	695	691.5
	0.384	700	696.5	700
	0.385	698.5	694.5	695.5
	0.386	703.5	698.5	700
	0.387	700	696	697.5
	0.388	701.5	694	698
	0.389	699.5	693.5	698
	0.39	704	695.5	696.5
	0.391	700	697.5	697
	0.392	701	697	696
	0.393	702	699	696.5
	0.394	702	697	697.5
	0.395	703.5	697	695
	0.396	703	699.5	694.5
	0.397	699	696	693
	0.398	701.5	699	698
	0.399	699	697.5	699
	0.4	702.5	698.5	694
	0.401	702	694.5	697.5
	0.402	700	695	694.5
	0.403	702.5	696	697
	0.404	700.5	698.5	696.5
	0.405	700.5	695.5	693
	0.406	704.5	699	693
	0.407	704.5	698.5	693.5
	0.408	703	694.5	697.5
	0.409	699.5	700	691.5
	0.41	703.5	695	699
	0.411	703.5	696.5	696
	0.412	704.5	700.5	698
	0.413	704	697	694.5
	0.414	704.5	698	694.5
	0.415	703	702	697.5
	0.416	698	700	696.5
	0.417	704	697	691.5
	0.418	703	696.5	696
	0.419	704	698.5	695.5
	0.42	700	695	698
	0.421	700	696.5	699
	0.422	703	698	698
	0.423	701	697	697
	0.424	700	696	697.5
	0.425	699	695	695
	0.426	701	698	697.5
	0.427	703.5	698	695
	0.428	698.5	700.5	696
	0.429	698.5	698	696
	0.43	701	695	697
	0.431	698	698	696.5
	0.432	701	699	696.5
	0.433	703	700.5	697
	0.434	700.5	700	697.5
	0.435	701	697.5	701
	0.436	698.5	697.5	700
	0.437	700.5	699	699
	0.438	700.5	698	697.5
	0.439	699	699	697
	0.44	698.5	701	695.5
	0.441	698	701	699.5
	0.442	698.5	702.5	694.5
	0.443	699	699	698
	0.444	698	696	700
	0.445	696.5	697	700
	0.446	698.5	698.5	697.5
	0.447	697	697.5	697.5
	0.448	698.5	700	696.5
	0.449	699.5	700.5	700
	0.45	697.5	700.5	697.5
	0.451	697.5	698	698.5
	0.452	697.5	701	699
	0.453	697.5	699.5	697.5
	0.454	694.5	700	695.5
	0.455	696.5	703	699
	0.456	697	697.5	702.5
	0.457	699.5	697.5	697.5
	0.458	701	697.5	694
	0.459	697.5	698	699.5
	0.46	698	700.5	697.5
	0.461	701	699	698.5
	0.462	697.5	696.5	695.5
	0.463	697	696.5	697.5
	0.464	696.5	700	697.5
	0.465	696.5	698	697.5
	0.466	700.5	699.5	697.5
	0.467	697.5	700.5	692.5
	0.468	697	701.5	699
	0.469	697.5	698.5	697
	0.47	700	697.5	699.5
	0.471	700	698.5	693
	0.472	699	697.5	696
	0.473	696	697.5	697.5
	0.474	697.5	696	698.5
	0.475	696.5	698	694.5
	0.476	701	698	697.5
	0.477	698.5	697.5	697.5
	0.478	698	697	697
	0.479	697	697	695
	0.48	697.5	697.5	697.5
	0.481	697	698	696.5
	0.482	695.5	697.5	695
	0.483	700	695.5	696
	0.484	694.5	697.5	694.5
	0.485	699.5	695.5	693.5
	0.486	698	698	696
	0.487	694.5	695.5	697.5
	0.488	700	696.5	696.5
	0.489	699	697.5	697
	0.49	697	700.5	693.5
	0.491	701	698	697
	0.492	700.5	697.5	697.5
	0.493	700	695.5	691.5
	0.494	696	697.5	697
	0.495	701	697.5	697.5
	0.496	700	697	700.5
	0.497	696.5	698.5	695
	0.498	697.5	695.5	693.5
	0.499	697	700.5	697.5
	0.5	700.5	698.5	695.5
	0.501	699.5	697.5	695.5
	0.502	700.5	694	695.5
	0.503	696.5	695.5	696.5
	0.504	697.5	696	697.5
	0.505	700.5	698.5	699
	0.506	697.5	691.5	695.5
	0.507	695	696	697.5
	0.508	699.5	696.5	696.5
	0.509	698	697	696.5
	0.51	698.5	695	699
	0.511	697.5	694	699
	0.512	700.5	697	695
	0.513	702	695	697.5
	0.514	698.5	696.5	699
	0.515	701	691.5	695.5
	0.516	701.5	696	696.5
	0.517	702.5	699	698.5
	0.518	699	698.5	691.5
	0.519	700.5	697.5	696.5
	0.52	697.5	698	699
	0.521	697.5	697.5	699.5
	0.522	700.5	697	698
	0.523	699.5	697	696
	0.524	700	699	695.5
	0.525	700.5	694.5	696.5
	0.526	700.5	697.5	699
	0.527	700	695.5	698
	0.528	699.5	697.5	699
	0.529	698.5	697.5	699
	0.53	702	697	696.5
	0.531	700.5	697.5	696.5
	0.532	700.5	695.5	695.5
	0.533	700.5	697.5	699.5
	0.534	700	694.5	700
	0.535	698.5	698	698.5
	0.536	701	697.5	693
	0.537	700.5	699	694.5
	0.538	699.5	696	698.5
	0.539	702.5	696.5	697.5
	0.54	698.5	695.5	700.5
	0.541	700	695.5	695.5
	0.542	701.5	696.5	695
	0.543	699	696.5	698.5
	0.544	700.5	695.5	697.5
	0.545	699	697.5	696.5
	0.546	697.5	697.5	700.5
	0.547	699.5	700	697
	0.548	705.5	695.5	699
	0.549	700	703	697.5
	0.55	700.5	698	697
	0.551	700.5	697	697
	0.552	698.5	696.5	696
	0.553	704.5	696.5	696
	0.554	700.5	696.5	696
	0.555	700	694.5	699
	0.556	703	695	698
	0.557	703	699.5	699
	0.558	699.5	694.5	697
	0.559	700.5	699	698.5
	0.56	701.5	697	696.5
	0.561	697.5	697.5	693
	0.562	701	697.5	699
	0.563	697	695.5	694
	0.564	698	697.5	698
	0.565	700	697	694.5
	0.566	700	697.5	699
	0.567	698	696	699
	0.568	701	693.5	694
	0.569	698.5	694.5	697.5
	0.57	702	695	696
	0.571	701	697	697
	0.572	700	697.5	698
	0.573	703	697.5	693.5
	0.574	699	697.5	697.5
	0.575	700.5	695.5	694.5
	0.576	699.5	697.5	697
	0.577	700.5	696	697.5
	0.578	700	697	695.5
	0.579	699.5	696.5	696.5
	0.58	697.5	697	695
	0.581	701	697.5	695
	0.582	702	699	695
	0.583	699	695.5	694.5
	0.584	699	698	695.5
	0.585	699.5	696.5	698.5
	0.586	698	697.5	694.5
	0.587	698	698	693.5
	0.588	701	694.5	697.5
	0.589	697.5	696.5	697
	0.59	698.5	701	696.5
	0.591	700	701	697.5
	0.592	702	695.5	694.5
	0.593	698.5	695.5	695
	0.594	699	695.5	694
	0.595	698	697.5	697.5
	0.596	706.5	699	696
	0.597	698.5	697.5	691.5
	0.598	699	700	691.5
	0.599	703	697	690.5
	0.6	697	702.5	698.5
	0.601	698.5	695	693
	0.602	698	698.5	695.5
	0.603	701	697	694.5
	0.604	701	697.5	695.5
	0.605	700.5	697.5	695.5
	0.606	698.5	698	696.5
	0.607	698.5	695.5	696
	0.608	702	698	696
	0.609	700.5	699.5	694
	0.61	699	693.5	695
	0.611	700	698	694.5
	0.612	700	694.5	691.5
	0.613	701.5	699.5	693
	0.614	699	694.5	693.5
	0.615	699.5	693	691.5
	0.616	698	699.5	693.5
	0.617	697.5	697.5	691.5
	0.618	699	701	695.5
	0.619	699.5	698	694
	0.62	701.5	696.5	697
	0.621	699	697.5	696
	0.622	701	695.5	691.5
	0.623	700.5	696	695
	0.624	699.5	692.5	695
	0.625	700	699.5	695.5
	0.626	700	696.5	697
	0.627	697.5	696.5	696
	0.628	699	696.5	695.5
	0.629	703.5	697	691
	0.63	699	694.5	696
	0.631	701	696.5	694.5
	0.632	701.5	697	696
	0.633	698.5	696.5	694.5
	0.634	697	698.5	693
	0.635	698.5	698	695.5
	0.636	700	696.5	695.5
	0.637	699	697.5	697.5
	0.638	701	694.5	696
	0.639	700	697	699
	0.64	700	694	696.5
	0.641	699	691.5	696
	0.642	698.5	691.5	698
	0.643	698.5	691.5	696
	0.644	700	697	697
	0.645	701	697.5	694.5
	0.646	700	693	700
	0.647	697.5	696.5	696.5
	0.648	703	696.5	697
	0.649	700.5	697.5	697.5
	0.65	700.5	699	697.5
	0.651	701	698	698
	0.652	699	694	691.5
	0.653	699.5	693.5	700.5
	0.654	698	694.5	697.5
	0.655	700.5	693	697
	0.656	698	696	697.5
	0.657	700	695	694
	0.658	702.5	696	700.5
	0.659	698.5	695.5	700
	0.66	697.5	696.5	698
	0.661	702	697	697.5
	0.662	701.5	691.5	699.5
	0.663	699	693.5	698.5
	0.664	698.5	697	697.5
	0.665	697.5	695	699
	0.666	701	696	700
	0.667	698.5	694.5	697.5
	0.668	699	697	699.5
	0.669	698	696	699
	0.67	698	695.5	698
	0.671	700.5	696.5	701.5
	0.672	699	694.5	695.5
	0.673	700.5	698	698.5
	0.674	699	697	700
	0.675	699.5	697.5	698
	0.676	696.5	695.5	699.5
	0.677	697.5	694	697.5
	0.678	696	697	701
	0.679	696.5	696.5	698
	0.68	697	696.5	699
	0.681	696	697	700
	0.682	701.5	698.5	703.5
	0.683	697	694	700
	0.684	698.5	695.5	700.5
	0.685	697	696	700
	0.686	698.5	695	700.5
	0.687	696.5	695.5	699
	0.688	699	695.5	701.5
	0.689	696.5	691.5	698.5
	0.69	697.5	696.5	695.5
	0.691	695.5	694.5	699
	0.692	697.5	696	699
	0.693	697.5	695	700.5
	0.694	697.5	693.5	698.5
	0.695	699	697.5	700
	0.696	698.5	693.5	700
	0.697	697.5	697.5	698.5
	0.698	697.5	701.5	698
	0.699	699	695	700
	0.7	695.5	698	697.5
	0.701	697.5	698	702
	0.702	696.5	699	698
	0.703	694.5	697.5	703
	0.704	697	696	698.5
	0.705	697.5	697.5	698
	0.706	697.5	696.5	697.5
	0.707	699	697.5	698
	0.708	698.5	695	697.5
	0.709	697.5	697.5	697.5
	0.71	698	695	697.5
	0.711	701.5	697	698
	0.712	698.5	697.5	699
	0.713	697.5	693.5	700
	0.714	699.5	694.5	697
	0.715	701	697	698
	0.716	698.5	697.5	700
	0.717	703	694.5	698.5
	0.718	699	695.5	697.5
	0.719	699	695.5	696.5
	0.72	700.5	697.5	697.5
	0.721	698	695	700
	0.722	700	694.5	698.5
	0.723	696	697.5	699.5
	0.724	698	695	695.5
	0.725	696	694.5	699
	0.726	697.5	698	695.5
	0.727	699	696	698
	0.728	701.5	697	694
	0.729	702	698.5	697.5
	0.73	697.5	697.5	697.5
	0.731	699	696	696
	0.732	701	694	701
	0.733	700	696.5	700
	0.734	702.5	693.5	696.5
	0.735	699	698.5	695.5
	0.736	703.5	695.5	693.5
	0.737	703.5	694.5	697.5
	0.738	701.5	694	695
	0.739	701.5	691.5	696
	0.74	701.5	697.5	696
	0.741	703.5	697.5	694
	0.742	701.5	693.5	696
	0.743	700.5	694.5	697.5
	0.744	702	694.5	697.5
	0.745	703.5	695.5	695.5
	0.746	701	695	695.5
	0.747	701	693.5	697
	0.748	697.5	693.5	700
	0.749	700	698.5	698
	0.75	701.5	693.5	698.5
	0.751	699	695	695.5
	0.752	701	694.5	697.5
	0.753	700	691.5	697.5
	0.754	701	696.5	698.5
	0.755	702	693	699
	0.756	699	690.5	696.5
	0.757	701	693.5	698
	0.758	703	695.5	697.5
	0.759	697.5	695.5	700.5
	0.76	698.5	693.5	701.5
	0.761	699	696.5	698.5
	0.762	698.5	697.5	699.5
	0.763	702.5	693.5	696.5
	0.764	695.5	691	701
	0.765	700.5	697.5	698.5
	0.766	695	696.5	699
	0.767	697.5	695	699.5
	0.768	701	695	701.5
	0.769	703.5	694.5	702.5
	0.77	699	694	699.5
	0.771	700	696	697.5
	0.772	697.5	693.5	700
	0.773	702.5	693	701.5
	0.774	698.5	696	700
	0.775	698	695.5	698
	0.776	700	694	695.5
	0.777	702.5	695	698
	0.778	696	697.5	700
	0.779	699	695	700.5
	0.78	697.5	692.5	703.5
	0.781	698.5	697	697.5
	0.782	702	697	701.5
	0.783	699	696	702
	0.784	693.5	693.5	700.5
	0.785	697	696.5	699
	0.786	695.5	697.5	700.5
	0.787	697.5	697	702
	0.788	699.5	695.5	701.5
	0.789	699	695.5	704.5
	0.79	696.5	696	700.5
	0.791	698.5	697.5	701
	0.792	697.5	698	703.5
	0.793	697	697.5	700
	0.794	698	697.5	700.5
	0.795	700	698	697
	0.796	692.5	696	698
	0.797	696	696.5	700
	0.798	698.5	697	700.5
	0.799	698	697.5	698.5
	0.8	700	700	696.5
	0.801	697.5	694.5	699.5
	0.802	699	699	697.5
	0.803	696	698	698.5
	0.804	698.5	697	696
	0.805	697.5	698.5	697.5
	0.806	699	695.5	700.5
	0.807	697.5	698	697.5
	0.808	697.5	696.5	694.5
	0.809	700.5	699	699
	0.81	697.5	697	699.5
	0.811	696.5	697.5	698
	0.812	701	697	699
	0.813	700	700	695.5
	0.814	698.5	698.5	693
	0.815	698	698	699.5
	0.816	697.5	698	698.5
	0.817	701	696	696.5
	0.818	699	697	698.5
	0.819	697.5	697.5	697.5
	0.82	700	698	696
	0.821	700.5	699.5	695.5
	0.822	699	697.5	695.5
	0.823	700	700.5	693.5
	0.824	698	700	697
	0.825	702.5	699	700
	0.826	699.5	698	696.5
	0.827	697.5	700.5	696.5
	0.828	697	699.5	694
	0.829	699	700.5	697.5
	0.83	697.5	696.5	695
	0.831	698.5	698.5	695
	0.832	699	701	695
	0.833	698	702.5	697.5
	0.834	700.5	700.5	693.5
	0.835	699	700.5	696
	0.836	698.5	699	696.5
	0.837	697.5	697.5	694
	0.838	696.5	701.5	694.5
	0.839	697	697.5	697
	0.84	697.5	697.5	695.5
	0.841	701	697.5	699.5
	0.842	698	698	695
	0.843	695	701	694
	0.844	699.5	696	691.5
	0.845	698	699.5	694.5
	0.846	698	699	693.5
	0.847	697.5	698.5	693.5
	0.848	695.5	700	695.5
	0.849	703	699	694.5
	0.85	698	698	691.5
	0.851	696	698	693
	0.852	698	700	693
	0.853	699.5	699.5	694.5
	0.854	700	698.5	694
	0.855	698	698	693.5
	0.856	696	696.5	693.5
	0.857	696.5	700.5	690.5
	0.858	699	697.5	695
	0.859	699.5	697.5	694
	0.86	697.5	699	690.5
	0.861	697	702.5	694.5
	0.862	695	700	696.5
	0.863	698	697	690.5
	0.864	700.5	697	695.5
	0.865	699	699	693.5
	0.866	697.5	697.5	693
	0.867	697	700	695.5
	0.868	700	700	696
	0.869	699.5	698.5	697.5
	0.87	700	699	693
	0.871	699.5	697.5	694.5
	0.872	700	697.5	698.5
	0.873	697.5	697.5	694.5
	0.874	702	699	696
	0.875	700	697.5	694
	0.876	698	699	694
	0.877	701.5	697.5	698
	0.878	694	696	697
	0.879	697.5	698	693
	0.88	701	700	695.5
	0.881	700.5	697.5	695
	0.882	699	697	694
	0.883	697.5	695.5	693.5
	0.884	699	694.5	693.5
	0.885	697.5	695.5	695.5
	0.886	700	695.5	696
	0.887	700.5	698	696.5
	0.888	697.5	696.5	692.5
	0.889	702	695.5	700
	0.89	699	696.5	697.5
	0.891	701	696.5	697.5
	0.892	701	697	693
	0.893	700	697	698
	0.894	701	699.5	695.5
	0.895	699.5	697.5	696.5
	0.896	703	697	696
	0.897	703	699.5	698
	0.898	703	697.5	697
	0.899	698.5	694	696.5
	0.9	702.5	697.5	697.5
	0.901	702.5	698	696.5
	0.902	700	695	697
	0.903	701.5	693.5	696
	0.904	701.5	694.5	695
	0.905	701.5	694	697.5
	0.906	705	697	697
	0.907	704.5	694	700.5
	0.908	702.5	696	697
	0.909	705	697.5	697.5
	0.91	704	697.5	701.5
	0.911	706.5	697.5	697.5
	0.912	702.5	697.5	697
	0.913	704.5	693.5	691.5
	0.914	700	698	699.5
	0.915	702	696	694.5
	0.916	704	697	697.5
	0.917	704.5	697.5	697.5
	0.918	705	699	697.5
	0.919	706.5	698	699
	0.92	704.5	700.5	696.5
	0.921	704	699	699
	0.922	702	699	695
	0.923	705.5	699	696.5
	0.924	703	695	699
	0.925	704.5	696	697.5
	0.926	701	697	697.5
	0.927	704.5	696	699.5
	0.928	704.5	696.5	694
	0.929	701.5	696	697.5
	0.93	705.5	699.5	694.5
	0.931	701	697.5	697
	0.932	704.5	698.5	691.5
	0.933	700	697.5	694
	0.934	704.5	695.5	697.5
	0.935	701.5	697.5	698
	0.936	704.5	696.5	697.5
	0.937	704.5	697.5	698.5
	0.938	702.5	698.5	696
	0.939	701	698	695.5
	0.94	705	695.5	697.5
	0.941	704.5	696	693.5
	0.942	703	700	698
	0.943	702	697.5	693
	0.944	701	698.5	697.5
	0.945	701	697.5	695.5
	0.946	699	694.5	696.5
	0.947	700	700.5	697
	0.948	700	702	696.5
	0.949	698	698.5	695.5
	0.95	702.5	700.5	697.5
	0.951	703	699	697.5
	0.952	700.5	700	697.5
	0.953	701	702	695.5
	0.954	702	699	698
	0.955	701	700.5	697.5
	0.956	699	700	696.5
	0.957	701	698.5	695.5
	0.958	700.5	699	694.5
	0.959	700.5	700	695.5
	0.96	702	698.5	691.5
	0.961	702	699	697.5
	0.962	703	698	697.5
	0.963	698.5	697.5	696.5
	0.964	699.5	699	697.5
	0.965	700.5	698	698.5
	0.966	701.5	700	696.5
	0.967	698.5	699	693
	0.968	702.5	702	697
	0.969	701.5	698.5	696.5
	0.97	701	698.5	695
	0.971	701	699	697.5
	0.972	700	701.5	695.5
	0.973	700.5	699	695.5
	0.974	701	697.5	699
	0.975	702	695.5	696.5
	0.976	698	700.5	699
	0.977	695.5	701.5	697.5
	0.978	704.5	700	693.5
	0.979	699	700	697
	0.98	699.5	699	698.5
	0.981	697.5	696.5	694.5
	0.982	698.5	697.5	700
	0.983	700.5	700.5	695
	0.984	698	702	696
	0.985	700	699.5	697.5
	0.986	703	699.5	696
	0.987	697.5	699.5	696.5
	0.988	700	697.5	697
	0.989	702.5	697.5	697.5
	0.99	701	698.5	695.5
	0.991	697.5	700	699
	0.992	699	697.5	696.5
	0.993	700	701.5	698
	0.994	700.5	697.5	697.5
	0.995	698	701	697.5
	0.996	697.5	696.5	698
	0.997	696.5	697.5	697.5
	0.998	700.5	699	696
	0.999	702	700.5	695.5
	1	698	698	698
	1.001	699	696.5	696.5
	1.002	702.5	700	697.5
	1.003	699.5	698	697
	1.004	698.5	697.5	698.5
	1.005	703	695.5	697.5
	1.006	698.5	697.5	697.5
	1.007	701	696.5	699.5
	1.008	699.5	697.5	699.5
	1.009	699.5	698.5	699
	1.01	701	698	693.5
	1.011	702	699.5	695.5
	1.012	700.5	701	696
	1.013	701.5	699	697
	1.014	702	698	697.5
	1.015	702.5	698	697.5
	1.016	701	697.5	698.5
	1.017	698	699	695.5
	1.018	704.5	699	694
	1.019	698	699	694
	1.02	699	698	695.5
	1.021	699	699	699.5
	1.022	699	696.5	699.5
	1.023	701.5	698.5	699
	1.024	699.5	697	697
	1.025	699	697.5	694.5
	1.026	701	698.5	697
	1.027	698.5	703.5	697.5
	1.028	697.5	700	695
	1.029	698.5	695.5	697.5
	1.03	699	701	696.5
	1.031	702.5	697.5	696.5
	1.032	701	694.5	696
	1.033	700	695.5	696
	1.034	702	700.5	698
	1.035	698.5	694.5	697.5
	1.036	702	702.5	698
	1.037	702.5	697	695
	1.038	700	696.5	696
	1.039	701.5	699	700
	1.04	704.5	696	699.5
	1.041	701.5	696	695.5
	1.042	698	697.5	696.5
	1.043	700.5	695.5	697.5
	1.044	700	698.5	701.5
	1.045	696	698	698.5
	1.046	702.5	700	697
	1.047	700.5	701.5	694.5
	1.048	699	695	697.5
	1.049	701.5	697.5	694
	1.05	700	697.5	696.5
	1.051	700.5	696.5	699.5
	1.052	700.5	697	700
	1.053	701	697.5	697
	1.054	700	696.5	698
	1.055	700.5	697.5	697
	1.056	699	696	696
	1.057	702	697.5	697.5
	1.058	701.5	696.5	697.5
	1.059	699.5	697.5	699.5
	1.06	703	696.5	697.5
	1.061	697	698	696
	1.062	703.5	694	701
	1.063	700.5	697.5	700
	1.064	697.5	695.5	699
	1.065	701	698	704.5
	1.066	698.5	693.5	698.5
	1.067	699.5	695	700
	1.068	701	694	697.5
	1.069	701	694.5	697.5
	1.07	699.5	692.5	699
	1.071	702	693	698.5
	1.072	700.5	694.5	699.5
	1.073	697	694.5	698
	1.074	699	693	698
	1.075	701	697.5	699
	1.076	701	694	703
	1.077	700.5	695.5	699
	1.078	700	695	699
	1.079	703	692.5	698.5
	1.08	699	695.5	702
	1.081	701	694.5	701.5
	1.082	699.5	696	700.5
	1.083	700.5	697.5	700
	1.084	701.5	696	699.5
	1.085	703	695	697
	1.086	701.5	694.5	698
	1.087	699	696.5	697.5
	1.088	701.5	697	701
	1.089	699.5	696.5	702
	1.09	700.5	694	696.5
	1.091	701	697	700
	1.092	702	700	698
	1.093	699.5	695	699
	1.094	702.5	697	699.5
	1.095	701	694	699
	1.096	702.5	696.5	700
	1.097	702	697	695.5
	1.098	702	696	699
	1.099	701	694.5	695.5
	1.1	701	695	694.5
	1.101	697.5	694.5	700.5
	1.102	701.5	693.5	699
	1.103	699.5	697.5	698
	1.104	701.5	697.5	696
	1.105	701	697.5	698
	1.106	698	694.5	703
	1.107	700	698	698
	1.108	703	696.5	696
	1.109	701.5	697.5	699.5
	1.11	698.5	696.5	699.5
	1.111	700	697.5	700
	1.112	700	694.5	697.5
	1.113	700.5	695	696.5
	1.114	701.5	697.5	698
	1.115	700.5	698.5	696.5
	1.116	701.5	697.5	697
	1.117	699	694.5	699
	1.118	704.5	697.5	697
	1.119	697.5	696	695
	1.12	699.5	696.5	694
	1.121	698	697.5	696
	1.122	698.5	697.5	695
	1.123	697.5	697.5	694.5
	1.124	698.5	700	695.5
	1.125	699	698.5	697
	1.126	698.5	698.5	697
	1.127	698	699.5	690.5
	1.128	697.5	695	697.5
	1.129	698.5	696.5	697.5
	1.13	699.5	695	694.5
	1.131	702.5	696	696.5
	1.132	699	699	694.5
	1.133	702	697.5	697.5
	1.134	698.5	696	696.5
	1.135	701.5	698.5	693
	1.136	699	697.5	697.5
	1.137	699.5	699	697
	1.138	700.5	697.5	695.5
	1.139	701	697.5	693
	1.14	699	697.5	694
	1.141	700.5	695	695
	1.142	704.5	697.5	696
	1.143	701.5	697	691.5
	1.144	697.5	697	691
	1.145	700.5	697.5	690.5
	1.146	700.5	698	694.5
	1.147	702	698	695.5
	1.148	701	697.5	694.5
	1.149	699	697.5	695
	1.15	700	694.5	691.5
	1.151	699	699	691.5
	1.152	702	694.5	691.5
	1.153	699.5	700	691
	1.154	700	697.5	695
	1.155	697	698	694.5
	1.156	703	698	694.5
	1.157	700.5	697	695.5
	1.158	701	698	697.5
	1.159	701.5	698.5	693
	1.16	700.5	700.5	691.5
	1.161	704	696	691.5
	1.162	699	698	694.5
	1.163	701.5	699	695.5
	1.164	701.5	698	696.5
	1.165	699.5	702	695.5
	1.166	699	700	693
	1.167	701	699	696
	1.168	702.5	699	692.5
	1.169	700	696	693.5
	1.17	700	700.5	695
	1.171	704	701.5	691.5
	1.172	701	697.5	694
	1.173	696.5	696	694
	1.174	699.5	700	694
	1.175	700.5	699.5	694.5
	1.176	699	700	694
	1.177	702.5	701	693
	1.178	701.5	698.5	691.5
	1.179	699	701	697
	1.18	702	701	694
	1.181	700	699	695.5
	1.182	699.5	699.5	695.5
	1.183	700.5	696.5	697
	1.184	699	699	694
	1.185	704	700	698
	1.186	701	701	697.5
	1.187	700	698.5	695
	1.188	701	702	696.5
	1.189	700.5	696	696.5
	1.19	697.5	696	694.5
	1.191	698	697.5	697
	1.192	700.5	697.5	697
	1.193	701.5	699	695.5
	1.194	700.5	698.5	700.5
	1.195	700	697.5	700.5
	1.196	700.5	696	698.5
	1.197	699	702.5	695
	1.198	701	697.5	696
	1.199	701	694.5	699
	1.2	704	698.5	697
	1.201	699	697.5	698.5
	1.202	700	694.5	702
	1.203	701	696.5	697
	1.204	701.5	695.5	697.5
	1.205	700.5	696.5	700.5
	1.206	699	696.5	693.5
	1.207	700	697	698.5
	1.208	702	699.5	696.5
	1.209	699.5	696.5	700.5
	1.21	702	696.5	697
	1.211	698	698	698
	1.212	701	699	695.5
	1.213	703	698	695.5
	1.214	699	695.5	698
	1.215	698.5	698.5	696.5
	1.216	698.5	699	695
	1.217	698	697.5	697
	1.218	695.5	695.5	697.5
	1.219	700.5	694.5	699
	1.22	701	696	697
	1.221	698	696	696
	1.222	698	695.5	699
	1.223	700	696	695.5
	1.224	700	700	697.5
	1.225	698	697	696.5
	1.226	702.5	697	697.5
	1.227	702.5	696	695.5
	1.228	701.5	698.5	696.5
	1.229	701.5	700.5	695.5
	1.23	699	696.5	696
	1.231	699.5	697.5	698
	1.232	700.5	697.5	693
	1.233	703	696.5	693.5
	1.234	700	699.5	696
	1.235	700	696	695.5
	1.236	701.5	698.5	697
	1.237	701	697.5	698.5
	1.238	700	698	696.5
	1.239	702.5	696	699
	1.24	701.5	695.5	695.5
	1.241	699	695.5	696.5
	1.242	699	700	699
	1.243	698	698.5	695
	1.244	698.5	697.5	698.5
	1.245	704	696.5	693.5
	1.246	703	697	696.5
	1.247	698	699	695
	1.248	700.5	697.5	697.5
	1.249	701	697	694.5
	1.25	704	696	697
	1.251	700	697	697
	1.252	700	699.5	697
	1.253	703.5	700	697.5
	1.254	703.5	697	698.5
	1.255	704.5	697.5	696.5
	1.256	698.5	695.5	696.5
	1.257	703	698.5	696.5
	1.258	699.5	700.5	696.5
	1.259	704.5	698	697.5
	1.26	700.5	702	695
	1.261	702.5	697.5	696.5
	1.262	701.5	701	698.5
	1.263	699	700.5	694.5
	1.264	701.5	701	698
	1.265	701	697.5	695
	1.266	701.5	699	697.5
	1.267	701.5	700.5	695.5
	1.268	702.5	701	696.5
	1.269	705.5	700	697.5
	1.27	699.5	697.5	694
	1.271	701.5	698	695.5
	1.272	701.5	697.5	694
	1.273	700	700	698.5
	1.274	700	697	694.5
	1.275	700	698.5	697.5
	1.276	700.5	700.5	697.5
	1.277	700.5	697.5	699
	1.278	702.5	700.5	693
	1.279	703	699.5	699.5
	1.28	701	697	695
	1.281	699.5	702.5	695
	1.282	700	697.5	698.5
	1.283	703.5	699.5	695.5
	1.284	700.5	698.5	697
	1.285	701	697.5	693.5
	1.286	701.5	698.5	697.5
	1.287	698	697.5	694.5
	1.288	700.5	699	696.5
	1.289	700	697.5	697
	1.29	699	697.5	696
	1.291	701.5	698.5	695
	1.292	703	695.5	695.5
	1.293	700	698.5	698.5
	1.294	701.5	701	694.5
	1.295	699	697.5	694.5
	1.296	700.5	696.5	695
	1.297	701	697.5	693.5
	1.298	699	697	694.5
	1.299	698.5	702	693
	1.3	701	697.5	695.5
	1.301	697.5	695.5	694.5
	1.302	702	696.5	694.5
	1.303	702	697.5	697
	1.304	699	697.5	696.5
	1.305	699	695.5	695.5
	1.306	702.5	695.5	698.5
	1.307	702.5	698	693.5
	1.308	701	699	694
	1.309	700	695.5	695
	1.31	697.5	694.5	697
	1.311	699	700.5	697.5
	1.312	697.5	698	695.5
	1.313	694.5	697.5	697
	1.314	699	696.5	697.5
	1.315	700	699.5	695.5
	1.316	697.5	695.5	691.5
	1.317	700.5	694	697.5
	1.318	699.5	697.5	698.5
	1.319	700.5	695	693.5
	1.32	701.5	697	696.5
	1.321	699	695	696.5
	1.322	699.5	695.5	694
	1.323	698.5	696.5	697
	1.324	701	695.5	699.5
	1.325	698	698.5	693.5
	1.326	700	697.5	698
	1.327	700	695.5	697.5
	1.328	699	696	697.5
	1.329	700.5	701.5	697
	1.33	701	696	694.5
	1.331	697.5	695	697
	1.332	698	700	699
	1.333	701	695.5	698.5
	1.334	699.5	698	697.5
	1.335	696.5	700	694.5
	1.336	699.5	701.5	697.5
	1.337	700.5	701	697
	1.338	697.5	698.5	697.5
	1.339	696.5	701	697.5
	1.34	702	697.5	699.5
	1.341	697.5	698	698.5
	1.342	697.5	700	699
	1.343	700	699.5	700
	1.344	699	698	699
	1.345	700	701	696.5
	1.346	699	699	696
	1.347	697.5	699.5	698
	1.348	698.5	702.5	702.5
	1.349	696.5	698	698
	1.35	697	704.5	701
	1.351	700	701	699
	1.352	702	701	699
	1.353	698.5	698.5	700
	1.354	701.5	706.5	698.5
	1.355	696.5	704.5	697.5
	1.356	704.5	704.5	699
	1.357	697.5	701	701
	1.358	698	702.5	700.5
	1.359	698.5	706	700.5
	1.36	696.5	705	696.5
	1.361	700.5	704.5	701
	1.362	700	702.5	700
	1.363	701	702.5	697.5
	1.364	697.5	706.5	699.5
	1.365	700	706.5	697.5
	1.366	697.5	705.5	697.5
	1.367	697.5	705	702.5
	1.368	698.5	704.5	697.5
	1.369	699	706.5	700
	1.37	697.5	706	701
	1.371	698.5	704.5	698
	1.372	696	702.5	698
	1.373	699.5	702	699.5
	1.374	699	704.5	700
	1.375	701	706	697.5
	1.376	699	705.5	701
	1.377	703	702.5	702.5
	1.378	700.5	706.5	696.5
	1.379	694.5	704.5	697.5
	1.38	702	705	699
	1.381	699	706.5	700
	1.382	700	705.5	699
	1.383	699.5	704.5	698.5
	1.384	699.5	705	697.5
	1.385	700.5	704.5	704
	1.386	698	705	699.5
	1.387	701	704.5	697.5
	1.388	697	705	698
	1.389	700	704	697.5
	1.39	699	704.5	695.5
	1.391	699.5	706	699.5
	1.392	700	704.5	701
	1.393	698.5	705	696
	1.394	701	705.5	697.5
	1.395	699	703.5	698.5
	1.396	700	704	697.5
	1.397	697	706.5	693.5
	1.398	698.5	702	696.5
	1.399	696.5	705.5	697.5
	1.4	701	703.5	695.5
	1.401	699	701	695
	1.402	696	704.5	698
	1.403	701	704.5	693.5
	1.404	698	705	699.5
	1.405	700.5	705.5	694.5
	1.406	697.5	705.5	695.5
	1.407	700.5	706.5	695.5
	1.408	702.5	704	695.5
	1.409	700.5	702	697
	1.41	700.5	701	691.5
	1.411	701.5	703	698
	1.412	702	704.5	694
	1.413	698	703	695
	1.414	699	704.5	696
	1.415	699.5	702	696.5
	1.416	699	706	695.5
	1.417	703.5	703	697
	1.418	697.5	701	693
	1.419	699	700.5	691.5
	1.42	697.5	706	695
	1.421	700	703	693.5
	1.422	700.5	698.5	692
	1.423	700	703	696.5
	1.424	700	702.5	691.5
	1.425	700.5	701	694.5
	1.426	698.5	700	691.5
	1.427	699.5	702	691.5
	1.428	696.5	698	694
	1.429	698	702	693.5
	1.43	697.5	703.5	688.5
	1.431	697.5	698	693
	1.432	701	702.5	693.5
	1.433	699.5	702	689.5
	1.434	701	699	690
	1.435	701	699.5	690.5
	1.436	697.5	701	691.5
	1.437	700	698	690
	1.438	700	700.5	693
	1.439	702.5	701	691.5
	1.44	695.5	699.5	689
	1.441	699	700	690.5
	1.442	698.5	698	688.5
	1.443	698	697.5	689.5
	1.444	701.5	697	689
	1.445	700.5	697.5	688.5
	1.446	699.5	697.5	691
	1.447	699.5	698.5	686.5
	1.448	703.5	697	693.5
	1.449	702	697.5	690.5
	1.45	701.5	697.5	690.5
	1.451	697.5	697	691.5
	1.452	700.5	696.5	690
	1.453	700.5	697.5	691.5
	1.454	699	698	691
	1.455	698.5	698.5	690
	1.456	699.5	697	693
	1.457	702	697.5	690.5
	1.458	701.5	696.5	691.5
	1.459	703.5	696.5	689.5
	1.46	704.5	698.5	693
	1.461	703	694.5	691
	1.462	702	694.5	696
	1.463	704.5	694	689
	1.464	700	697	690
	1.465	702	697	691.5
	1.466	702.5	694	693
	1.467	703	697.5	691.5
	1.468	703	691	691.5
	1.469	698.5	691.5	691
	1.47	704.5	695	693.5
	1.471	699	694	690
	1.472	698.5	694.5	693
	1.473	699.5	695	693
	1.474	702	693.5	691.5
	1.475	698	697.5	693.5
	1.476	705	696.5	694
	1.477	699.5	697.5	694.5
	1.478	700.5	695.5	691.5
	1.479	701.5	697	699
	1.48	698.5	696.5	697
	1.481	702.5	694.5	698
	1.482	704.5	696	694.5
	1.483	704.5	697.5	697.5
	1.484	704	699.5	695
	1.485	702	695.5	696
	1.486	698	700.5	695
	1.487	700.5	696.5	693.5
	1.488	702.5	700	696.5
	1.489	704	699.5	696
	1.49	701.5	698.5	696.5
	1.491	702.5	702.5	697.5
	1.492	700	700	694
	1.493	702	704	697.5
	1.494	701.5	704.5	697.5
	1.495	700.5	700.5	698.5
	1.496	701.5	702	697
	1.497	704.5	703	697
	1.498	703	704.5	698.5
	1.499	700	706.5	697
	1.5	697.5	705.5	699.5
	1.501	699.5	708.5	695.5
	1.502	697.5	706.5	702
	1.503	699	706	695.5
	1.504	699.5	706.5	699.5
	1.505	700.5	710	695.5
	1.506	700	706.5	699
	1.507	700	706.5	702
	1.508	701	709	700.5
	1.509	699	713	698.5
	1.51	698.5	709.5	700
	1.511	699.5	710	702
	1.512	697.5	711.5	700.5
	1.513	700.5	710	702
	1.514	697	706.5	700
	1.515	697	711	698.5
	1.516	699.5	706.5	700.5
	1.517	698	709	699
	1.518	697.5	706.5	704
	1.519	696.5	711	702.5
	1.52	695.5	706.5	702
	1.521	697	706.5	705
	1.522	699	706.5	704
	1.523	697	704.5	702.5
	1.524	698.5	706	702.5
	1.525	695.5	706	705
	1.526	697.5	705.5	704.5
	1.527	700.5	702	704
	1.528	693.5	704.5	706.5
	1.529	700	701	706.5
	1.53	696.5	702.5	702
	1.531	698	701	703.5
	1.532	694.5	699	706.5
	1.533	695	698	708.5
	1.534	697	695.5	705
	1.535	697.5	691.5	706.5
	1.536	697.5	694	706.5
	1.537	694.5	693	704.5
	1.538	698	688.5	706.5
	1.539	697.5	688.5	702.5
	1.54	697.5	684.5	704.5
	1.541	697.5	683	705
	1.542	696.5	684	706.5
	1.543	696.5	677.5	705
	1.544	696.5	676	706
	1.545	695.5	675	705.5
	1.546	697.5	675	706.5
	1.547	695.5	667.5	706.5
	1.548	696.5	672.5	705
	1.549	694	664.5	706.5
	1.55	696.5	665.5	705.5
	1.551	696.5	661.5	706
	1.552	700.5	656.5	705
	1.553	699	657.5	710
	1.554	698	654	704.5
	1.555	698.5	649.5	709
	1.556	699	646	705.5
	1.557	701	642.5	710.5
	1.558	697.5	639	704.5
	1.559	697.5	637.5	706.5
	1.56	698.5	633	706.5
	1.561	698	629	711
	1.562	700.5	628.5	706.5
	1.563	700	622	709.5
	1.564	699	620	704.5
	1.565	696.5	615.5	710.5
	1.566	696.5	612	706.5
	1.567	698	602	709
	1.568	699.5	599.5	709.5
	1.569	700	601.5	711.5
	1.57	701.5	594	711.5
	1.571	697	588.5	710.5
	1.572	699	581	711
	1.573	700	579.5	715.5
	1.574	701.5	572.5	710.5
	1.575	699.5	568.5	712
	1.576	699	563	711.5
	1.577	698	557.5	713.5
	1.578	700	554	716
	1.579	700.5	545.5	717
	1.58	700.5	544.5	712.5
	1.581	699	537.5	718
	1.582	700	535	719
	1.583	700.5	531.5	715.5
	1.584	697.5	526.5	717
	1.585	700.5	519.5	716
	1.586	702	515.5	718
	1.587	701	510.5	716
	1.588	698.5	508	721
	1.589	701	501	721.5
	1.59	701	499	719
	1.591	698.5	492.5	721.5
	1.592	698.5	491	721.5
	1.593	701	484.5	723.5
	1.594	702.5	477.5	725
	1.595	697.5	473.5	718.5
	1.596	697.5	473	718
	1.597	700	467	721.5
	1.598	698	463.5	721.5
	1.599	701.5	456.5	723
	1.6	697.5	452.5	723
	1.601	699	448.5	721.5
	1.602	696	444.5	721.5
	1.603	697.5	442.5	725
	1.604	697.5	437.5	721.5
	1.605	701	434	723.5
	1.606	698	430	725
	1.607	699.5	430.5	727
	1.608	701.5	427	726.5
	1.609	697	427	723
	1.61	701	423	725
	1.611	697	421	724
	1.612	700	420.5	726
	1.613	699	417.5	726.5
	1.614	699.5	415	721.5
	1.615	699.5	413.5	721.5
	1.616	700	410	723.5
	1.617	699	407	725
	1.618	700.5	403	724.5
	1.619	700.5	406	726
	1.62	704	400	724
	1.621	702	399	723.5
	1.622	698.5	396.5	723.5
	1.623	698.5	395.5	725
	1.624	701	395.5	724.5
	1.625	697.5	390	720
	1.626	701.5	389.5	723
	1.627	697	391	725
	1.628	701.5	387.5	718
	1.629	704	380.5	717.5
	1.63	703.5	383	723
	1.631	700	381.5	721
	1.632	700.5	378.5	718
	1.633	701	372	715.5
	1.634	699.5	377	716.5
	1.635	702.5	371	715.5
	1.636	701	369	717
	1.637	704.5	371	712.5
	1.638	699	365.5	713.5
	1.639	698.5	363	712
	1.64	703	361	714
	1.641	698.5	362.5	711
	1.642	700.5	359.5	706.5
	1.643	701.5	352.5	706.5
	1.644	701	348.5	710.5
	1.645	699	347.5	709
	1.646	700.5	348.5	704.5
	1.647	700	341.5	704.5
	1.648	699.5	342.5	706.5
	1.649	702.5	338	704
	1.65	701.5	339	705
	1.651	699.5	336	703
	1.652	702	333.5	702.5
	1.653	700	330	698
	1.654	698	328	699
	1.655	701.5	324.5	699.5
	1.656	700	321	697.5
	1.657	699	318.5	694.5
	1.658	697.5	321	695
	1.659	699.5	314.5	697.5
	1.66	701.5	311.5	692.5
	1.661	703	306.5	690
	1.662	699	306	693.5
	1.663	700.5	301	688.5
	1.664	695.5	298.5	691.5
	1.665	702	294.5	689
	1.666	699.5	293	689
	1.667	699.5	288.5	685.5
	1.668	697.5	283	683.5
	1.669	699	280	685
	1.67	699.5	280.5	681.5
	1.671	699.5	277	679.5
	1.672	700	275	679
	1.673	700.5	271	677
	1.674	698.5	262	676
	1.675	694.5	263.5	676
	1.676	703	261.5	673.5
	1.677	694	253.5	670.5
	1.678	699.5	255	671.5
	1.679	701	248.5	671
	1.68	698.5	251	665
	1.681	701	246	664.5
	1.682	698.5	240	664
	1.683	700.5	239	663.5
	1.684	698.5	233	661
	1.685	698	230	660
	1.686	700	230.5	656
	1.687	702	223	656
	1.688	698.5	221	651.5
	1.689	704.5	221	653.5
	1.69	698.5	220.5	651
	1.691	700.5	222.5	649.5
	1.692	697	217	650
	1.693	701	215.5	647
	1.694	701	218.5	643.5
	1.695	700.5	219.5	643
	1.696	701.5	215.5	636
	1.697	702.5	220.5	638
	1.698	703.5	219	636.5
	1.699	701.5	217	631
	1.7	701	221.5	632
	1.701	704	221.5	632
	1.702	703.5	220.5	631.5
	1.703	704.5	228.5	628.5
	1.704	703	228	626.5
	1.705	700	229	624.5
	1.706	703	229.5	626.5
	1.707	703	234.5	624
	1.708	704	232.5	623
	1.709	704	237	621
	1.71	705	236	622
	1.711	705	241	620.5
	1.712	704.5	239.5	622
	1.713	703.5	241	620
	1.714	702	246	617
	1.715	705.5	248.5	616
	1.716	702	252.5	617
	1.717	704.5	248	618.5
	1.718	706.5	251	614
	1.719	709	254.5	614
	1.72	706.5	257	612
	1.721	706.5	259	608
	1.722	706.5	257.5	610
	1.723	705.5	262.5	606
	1.724	706.5	260.5	608
	1.725	709	264.5	601
	1.726	709.5	261	605
	1.727	704	265	600.5
	1.728	709	266.5	601
	1.729	705.5	264.5	599.5
	1.73	705.5	264	604
	1.731	706.5	266.5	597.5
	1.732	706.5	267.5	597.5
	1.733	709.5	264	597
	1.734	708	268.5	594.5
	1.735	704.5	266.5	596
	1.736	705.5	266	592.5
	1.737	706.5	266.5	591.5
	1.738	706	266.5	589.5
	1.739	706.5	266.5	586
	1.74	709	265	585.5
	1.741	706.5	261.5	587.5
	1.742	706.5	262	581
	1.743	706.5	264	579
	1.744	708.5	257.5	579.5
	1.745	706.5	259.5	575.5
	1.746	706.5	257.5	575
	1.747	710.5	257	575
	1.748	706.5	259.5	572
	1.749	711	258.5	569.5
	1.75	712.5	258.5	568.5
	1.751	706.5	255.5	565.5
	1.752	706.5	258	561
	1.753	706.5	259.5	560
	1.754	711	257	554.5
	1.755	706.5	255	551
	1.756	710.5	257	548
	1.757	712	262	544
	1.758	713	255.5	541
	1.759	706.5	257	538
	1.76	711.5	258.5	532.5
	1.761	706.5	259.5	531.5
	1.762	711.5	259.5	523
	1.763	713.5	261	518.5
	1.764	709	263	518.5
	1.765	711.5	261.5	510
	1.766	710.5	265	502.5
	1.767	708.5	262	501
	1.768	711	264.5	495.5
	1.769	709.5	270.5	486.5
	1.77	706.5	269	481.5
	1.771	713	273	472.5
	1.772	709.5	274.5	468
	1.773	706.5	278	462.5
	1.774	712.5	278	454
	1.775	706.5	283	449.5
	1.776	709.5	287	445.5
	1.777	710.5	291	439.5
	1.778	710.5	292.5	430.5
	1.779	708.5	298	426
	1.78	710.5	300	419.5
	1.781	706.5	304	411.5
	1.782	706.5	307.5	403.5
	1.783	706.5	314	401.5
	1.784	711	310.5	391.5
	1.785	704.5	319	387
	1.786	706.5	324.5	378.5
	1.787	706.5	325.5	374
	1.788	706.5	328	368
	1.789	705	332	363.5
	1.79	706	334.5	355.5
	1.791	708.5	337	348.5
	1.792	705	342	346
	1.793	705.5	344	341.5
	1.794	702	348	335
	1.795	706	355.5	329
	1.796	704.5	357.5	324
	1.797	702.5	362.5	319.5
	1.798	705.5	369.5	316
	1.799	701	370.5	314.5
	1.8	706.5	377.5	309.5
	1.801	703	384	307
	1.802	702	388	305
	1.803	701	395.5	303
	1.804	698	400.5	303
	1.805	698.5	403.5	301
	1.806	700	408.5	300.5
	1.807	701.5	412	298.5
	1.808	698.5	418.5	297.5
	1.809	697	424	296
	1.81	698	431.5	295
	1.811	695.5	437.5	300.5
	1.812	697	436.5	300.5
	1.813	691	445.5	301.5
	1.814	693.5	453	305.5
	1.815	691.5	458	302.5
	1.816	690	463	306
	1.817	697	468	305.5
	1.818	689.5	472.5	307.5
	1.819	691.5	484.5	307.5
	1.82	690.5	487.5	310
	1.821	688	496.5	309.5
	1.822	684.5	503	318
	1.823	686.5	511	316.5
	1.824	687.5	516	319.5
	1.825	685.5	526.5	323.5
	1.826	686.5	533.5	326
	1.827	684	540	328
	1.828	684	547	329
	1.829	677	555	333
	1.83	678.5	564	335
	1.831	676.5	569.5	336.5
	1.832	676.5	578.5	340.5
	1.833	673	582.5	340
	1.834	676	591.5	344
	1.835	671.5	600.5	347.5
	1.836	673	607	348.5
	1.837	673	615.5	348
	1.838	667	626	351
	1.839	668.5	632	350.5
	1.84	667	638.5	350.5
	1.841	659.5	647	356
	1.842	661	656.5	355.5
	1.843	660	667	357
	1.844	658.5	673.5	355.5
	1.845	657.5	683.5	357
	1.846	657	691	354.5
	1.847	655.5	700	356
	1.848	654.5	706.5	352.5
	1.849	651.5	719.5	348
	1.85	650.5	725	348.5
	1.851	647	734	348.5
	1.852	647	741	345.5
	1.853	647	751.5	345.5
	1.854	643	759.5	343.5
	1.855	642.5	766	343
	1.856	644	774.5	339.5
	1.857	636	786	338.5
	1.858	635	789.5	335
	1.859	633.5	796	335
	1.86	629	805	328.5
	1.861	629	816	328.5
	1.862	627.5	820.5	323.5
	1.863	631	826	322.5
	1.864	626.5	839.5	317.5
	1.865	622	845.5	317
	1.866	622.5	855.5	308.5
	1.867	623.5	861	305.5
	1.868	621.5	875.5	303
	1.869	619	879.5	299
	1.87	615.5	891.5	292.5
	1.871	615	900.5	294.5
	1.872	614.5	907.5	286.5
	1.873	611.5	915.5	285.5
	1.874	612.5	925.5	281.5
	1.875	610	937.5	276
	1.876	605	944	275
	1.877	604	958	272
	1.878	604.5	964	264.5
	1.879	601.5	970	264
	1.88	598.5	982.5	259.5
	1.881	596	990	258.5
	1.882	597	1000.5	253
	1.883	593	1009.5	250.5
	1.884	592	1019.5	248.5
	1.885	589	1028.5	246
	1.886	584.5	1042	246.5
	1.887	585	1049.5	245.5
	1.888	578.5	1064	244
	1.889	578.5	1076.5	239
	1.89	575	1087.5	242.5
	1.891	572.5	1097.5	241.5
	1.892	572	1109	239.5
	1.893	567.5	1122.5	239.5
	1.894	563.5	1139	237
	1.895	562.5	1146	241
	1.896	557.5	1159.5	239
	1.897	560	1174.5	239.5
	1.898	552	1183.5	241
	1.899	550.5	1195	241
	1.9	542.5	1212	241.5
	1.901	541.5	1221.5	239.5
	1.902	539	1233.5	239
	1.903	537.5	1243.5	241.5
	1.904	532	1258.5	244
	1.905	527	1266.5	245
	1.906	525.5	1279.5	245
	1.907	525	1288	248
	1.908	518.5	1303	250
	1.909	513	1316	251.5
	1.91	513	1327	253
	1.911	503	1336	258.5
	1.912	500.5	1346	254.5
	1.913	493.5	1359.5	260
	1.914	488.5	1368	261
	1.915	485	1377.5	264
	1.916	480	1392.5	265.5
	1.917	477	1406.5	272.5
	1.918	470	1418.5	271.5
	1.919	467.5	1429.5	273.5
	1.92	460.5	1436.5	276.5
	1.921	455.5	1446.5	280
	1.922	449.5	1457.5	278.5
	1.923	448.5	1466	284.5
	1.924	444	1479.5	286.5
	1.925	438	1482	288.5
	1.926	432	1497	294
	1.927	432	1504.5	291
	1.928	430.5	1511.5	294.5
	1.929	423	1521	301
	1.93	419	1526.5	302.5
	1.931	413.5	1538	304
	1.932	410.5	1547	307.5
	1.933	404	1553.5	315.5
	1.934	403.5	1561.5	315.5
	1.935	395.5	1564	317
	1.936	387	1571.5	318.5
	1.937	390.5	1583.5	322.5
	1.938	383.5	1590	328
	1.939	379	1595.5	331
	1.94	376.5	1601	336.5
	1.941	375.5	1608	339.5
	1.942	369	1613.5	344
	1.943	365.5	1622	348.5
	1.944	361.5	1629	352
	1.945	360	1637	356
	1.946	356	1638	358
	1.947	354.5	1646	361
	1.948	350.5	1652	366.5
	1.949	346	1658.5	369
	1.95	351	1668	376
	1.951	346	1670	379.5
	1.952	343.5	1680.5	387
	1.953	339	1682	389.5
	1.954	338.5	1690.5	394.5
	1.955	336.5	1698.5	399
	1.956	335	1704.5	398
	1.957	331.5	1709.5	401
	1.958	329	1716	403
	1.959	330	1718	404
	1.96	331	1720.5	408
	1.961	331.5	1727.5	411.5
	1.962	327.5	1733.5	414.5
	1.963	323.5	1742	417
	1.964	328	1746	420.5
	1.965	330	1744.5	423.5
	1.966	327.5	1750.5	425.5
	1.967	330	1759	427
	1.968	332	1765	428.5
	1.969	330.5	1765	433
	1.97	333.5	1771	432
	1.971	333.5	1776	436
	1.972	337	1775.5	436.5
	1.973	335	1779	438
	1.974	336	1780	443
	1.975	337	1780	442.5
	1.976	333	1780	444.5
	1.977	340.5	1780	448.5
	1.978	340	1790.5	448
	1.979	343	1792	449
	1.98	339	1793.5	455.5
	1.981	340.5	1791.5	456.5
	1.982	338	1795	458
	1.983	341	1795	460
	1.984	344	1795	463
	1.985	343	1802	463
	1.986	343	1805	471.5
	1.987	341	1806.5	476.5
	1.988	341	1809	477.5
	1.989	343	1810	481.5
	1.99	336.5	1810	486.5
	1.991	339	1815.5	493
	1.992	337.5	1818.5	499
	1.993	338	1818.5	501.5
[truncated: 6,006 more rows]

## Sheet: F
DataTypeVer2.0	Time	Fz	Fz	Fz
NumberOfData		7000	7000	7000
PreTriggerData		0	0	0
SamplingTime[ms]		1	1	1
DataLabel		E1:CMJ	E2:CMJ	E3:CMJ
DataUnit	sec	N	N	N
	0	615.5	615.5	615.5
	0.001	611	613	615.5
	0.002	612	610.5	617.5
	0.003	614.5	612	617
	0.004	614.5	617	617
	0.005	612.5	614.5	615.5
	0.006	609	615	614.5
	0.007	615	617	613
	0.008	610	613.5	616.5
	0.009	611.5	615.5	615.5
	0.01	611	615	614.5
	0.011	612.5	612	615.5
	0.012	609	613	613
	0.013	612	613	612.5
	0.014	612	614.5	615
	0.015	611	615.5	615
	0.016	610	612	614
	0.017	615	613	613.5
	0.018	613.5	618	613.5
	0.019	612.5	613.5	614.5
	0.02	612	614.5	615
	0.021	615.5	615	615.5
	0.022	613	612	615.5
	0.023	612.5	615.5	611
	0.024	613.5	614	616
	0.025	614.5	615.5	613.5
	0.026	612.5	614.5	613.5
	0.027	610	615.5	615
	0.028	611.5	618	614
	0.029	611	614.5	612.5
	0.03	613.5	616.5	612.5
	0.031	616	614	614
	0.032	612	615.5	614
	0.033	613.5	613	613
	0.034	608.5	612.5	610.5
	0.035	610.5	615.5	609.5
	0.036	613.5	615.5	615
	0.037	614	615	611.5
	0.038	611.5	616.5	615.5
	0.039	613	613.5	612
	0.04	615	619	613.5
	0.041	611	616.5	612.5
	0.042	615	615	612.5
	0.043	614.5	614	613
	0.044	611.5	613.5	609
	0.045	611	618	617
	0.046	614	618	612.5
	0.047	612	614	616
	0.048	612	613.5	613
	0.049	613	614.5	610.5
	0.05	609.5	612.5	611
	0.051	615	613.5	609
	0.052	613	616	609.5
	0.053	612	612	611.5
	0.054	614	613.5	612.5
	0.055	613	613.5	612
	0.056	613	613.5	611
	0.057	611	613.5	611
	0.058	613.5	616	611
	0.059	614	613.5	612.5
	0.06	612.5	615	610
	0.061	613	615.5	615
	0.062	618.5	615	612.5
	0.063	616	613	612.5
	0.064	612.5	614	612.5
	0.065	611.5	614	611.5
	0.066	615.5	610.5	614
	0.067	612.5	612.5	615
	0.068	615	611	615.5
	0.069	615.5	615.5	609.5
	0.07	615.5	613.5	612.5
	0.071	614.5	615	609
	0.072	613.5	614	610.5
	0.073	616	614	612.5
	0.074	617.5	613.5	609.5
	0.075	615.5	610.5	614
	0.076	615.5	611	610.5
	0.077	615	614	608
	0.078	616.5	610	613
	0.079	616	614	610
	0.08	612	609.5	611.5
	0.081	614	614.5	610
	0.082	614.5	616	607.5
	0.083	614.5	613.5	611
	0.084	615.5	612.5	608.5
	0.085	618	610.5	611
	0.086	614	615	610.5
	0.087	616	614.5	611.5
	0.088	612.5	612.5	612.5
	0.089	612.5	614	614
	0.09	615.5	611	615
	0.091	617.5	613.5	612
	0.092	616	611.5	610
	0.093	612	610.5	614
	0.094	615.5	608.5	614
	0.095	614.5	613	612.5
	0.096	614	611.5	611
	0.097	615	612	608.5
	0.098	615	615.5	613.5
	0.099	616.5	613	615
	0.1	613.5	619.5	611
	0.101	611.5	614.5	615.5
	0.102	615.5	615	613.5
	0.103	612	613.5	616
	0.104	611.5	611	611
	0.105	612.5	611.5	612.5
	0.106	613	614.5	609
	0.107	613	614	615.5
	0.108	612.5	615	613
	0.109	614	613	615
	0.11	609	614.5	614.5
	0.111	612	616.5	614.5
	0.112	608.5	611.5	615.5
	0.113	609.5	616	614.5
	0.114	611.5	616	613
	0.115	611	614.5	612.5
	0.116	612.5	614.5	613.5
	0.117	609.5	611	613.5
	0.118	610.5	614.5	615.5
	0.119	610	613	611
	0.12	612.5	612	615
	0.121	611.5	615.5	615
	0.122	608	614.5	609
	0.123	610.5	614.5	613
	0.124	611	612.5	615.5
	0.125	613	612	612
	0.126	606.5	615.5	614.5
	0.127	612.5	614	613.5
	0.128	610.5	616.5	612.5
	0.129	610	612.5	614.5
	0.13	611.5	611.5	613.5
	0.131	610	614.5	612.5
	0.132	611.5	611.5	613.5
	0.133	610.5	609.5	608.5
	0.134	609.5	611.5	612.5
	0.135	608.5	611.5	613
	0.136	611.5	611.5	614.5
	0.137	608	609.5	615.5
	0.138	610	608.5	611
	0.139	612	611.5	614
	0.14	609	611	611.5
	0.141	608.5	611.5	613
	0.142	610	612	616
	0.143	606.5	612	615.5
	0.144	609	615	611
	0.145	610	608.5	613
	0.146	607	607	617
	0.147	607.5	610	614
	0.148	612	610	616.5
	0.149	611	613.5	614.5
	0.15	607.5	611	613
	0.151	611	611.5	614
	0.152	607.5	611.5	611
	0.153	610	614	612.5
	0.154	610.5	610	613.5
	0.155	607	608.5	613.5
	0.156	609.5	612.5	611
	0.157	609	614.5	613
	0.158	612	612.5	613
	0.159	611	611	613.5
	0.16	608.5	608.5	611
	0.161	608	610.5	613.5
	0.162	614.5	612	611.5
	0.163	609.5	612.5	618
	0.164	611.5	613.5	614
	0.165	611.5	610	611.5
	0.166	613	610.5	612.5
	0.167	613.5	614	613
	0.168	613	612	615.5
	0.169	614.5	611	614.5
	0.17	609.5	610.5	614
	0.171	612	615.5	613
	0.172	611.5	609	612.5
	0.173	612	613.5	615.5
	0.174	612	612.5	615.5
	0.175	616	613	617
	0.176	609.5	612.5	614.5
	0.177	614.5	613.5	615
	0.178	612	614.5	614
	0.179	611.5	612	614.5
	0.18	611	614.5	613.5
	0.181	616	614	613.5
	0.182	616	611	615.5
	0.183	612.5	615	612
	0.184	612.5	613	613.5
	0.185	615	611	615.5
	0.186	610.5	615	611
	0.187	616	616	610
	0.188	616.5	615	613
	0.189	612	614.5	614.5
	0.19	614	614.5	612.5
	0.191	614	613.5	612
	0.192	613	615.5	613
	0.193	613	612	614
	0.194	616	617	612.5
	0.195	612.5	616	614
	0.196	611.5	615.5	612
	0.197	613.5	615	615.5
	0.198	611.5	614.5	614.5
	0.199	615.5	612.5	614.5
	0.2	616	616	615
	0.201	613.5	613.5	613.5
	0.202	617	613.5	615.5
	0.203	614	612	615.5
	0.204	612	613	616
	0.205	616.5	610.5	611.5
	0.206	612	615	613.5
	0.207	615	615.5	612
	0.208	616	614.5	612
	0.209	613.5	613.5	614.5
	0.21	613	612	617.5
	0.211	616.5	613	614.5
	0.212	611	614	614.5
	0.213	616	614.5	615.5
	0.214	617	613.5	611
	0.215	611.5	612	615
	0.216	616	613.5	610.5
	0.217	615	616	614.5
	0.218	614.5	614.5	614
	0.219	611	614	614.5
	0.22	614	613.5	613.5
	0.221	615	614	614.5
	0.222	612	616	613
	0.223	614.5	612	615.5
	0.224	616	613.5	614.5
	0.225	615.5	611.5	616
	0.226	615.5	614.5	614
	0.227	616	609.5	618
	0.228	611.5	615.5	616
	0.229	617.5	614	611
	0.23	614	613	614
	0.231	611	614	613.5
	0.232	614	610	615.5
	0.233	614	613.5	615.5
	0.234	616	609.5	613
	0.235	614.5	612.5	616
	0.236	613.5	612	617
	0.237	614	614	617
	0.238	614	611	612.5
	0.239	614	612.5	614.5
	0.24	615	612	613
	0.241	614.5	614	614.5
	0.242	615.5	611.5	615.5
	0.243	616.5	613	612
	0.244	612.5	614.5	616
	0.245	614	613	614.5
	0.246	611.5	609.5	615
	0.247	611.5	612	612.5
	0.248	612	611.5	614.5
	0.249	613	611.5	615.5
	0.25	614	615	613.5
	0.251	616.5	614	612
	0.252	615.5	609.5	616
	0.253	615.5	614.5	614.5
	0.254	612	616	615
	0.255	616.5	611	610.5
	0.256	613	613.5	611.5
	0.257	615.5	609	614.5
	0.258	614.5	616	609.5
	0.259	612.5	611	612
	0.26	611.5	611	615
	0.261	615	615.5	615
	0.262	613	611	611
	0.263	617.5	611.5	613.5
	0.264	612.5	613	614
	0.265	616.5	611.5	614.5
	0.266	614	611.5	611.5
	0.267	616	616	613
	0.268	615.5	609.5	615.5
	0.269	612	611.5	614
	0.27	613	614	614.5
	0.271	614	614	614
	0.272	611	613.5	611.5
	0.273	611.5	611.5	611.5
	0.274	613	612.5	611
	0.275	613	614.5	609
	0.276	614.5	611	613.5
	0.277	614	614	608
	0.278	613.5	613.5	614.5
	0.279	615.5	611.5	614
	0.28	613.5	615	611
	0.281	614	615.5	615
	0.282	614	614	609.5
	0.283	610.5	612.5	612
	0.284	615.5	615.5	613.5
	0.285	614.5	613	613.5
	0.286	612	612.5	611
	0.287	615.5	610.5	610.5
	0.288	614.5	611.5	615
	0.289	613.5	612	613
	0.29	614.5	613	611
	0.291	611.5	614	612.5
	0.292	612	614	615.5
	0.293	612	612.5	612
	0.294	612	612	613.5
	0.295	612	611.5	612.5
	0.296	612.5	610.5	614
	0.297	614.5	611.5	610.5
	0.298	615	611.5	615
	0.299	611	613.5	615.5
	0.3	614.5	615.5	612
	0.301	613	612.5	614
	0.302	612.5	613.5	614
	0.303	613	614	610.5
	0.304	612.5	610.5	612.5
	0.305	613	610.5	611
	0.306	612	614.5	612.5
	0.307	610.5	612.5	611
	0.308	614	614.5	612
	0.309	614.5	612.5	613
	0.31	610.5	615	616.5
	0.311	613	616	610.5
	0.312	611	612.5	614.5
	0.313	613.5	612	615.5
	0.314	610	612	611.5
	0.315	612	613.5	611
	0.316	611.5	616	618.5
	0.317	612	613	616
	0.318	611	614	616
	0.319	614	613.5	619
	0.32	610	613.5	612
	0.321	610.5	613	617
	0.322	612	615.5	616.5
	0.323	611	614	615
	0.324	610.5	612.5	613.5
	0.325	612	612.5	615.5
	0.326	612.5	614	615.5
	0.327	612	612.5	613.5
	0.328	611.5	611.5	613.5
	0.329	610.5	612	614
	0.33	610.5	617	616
	0.331	611.5	613.5	616.5
	0.332	614.5	615.5	612.5
	0.333	610.5	611	615
	0.334	615.5	614.5	618
	0.335	613	615.5	615
	0.336	610	611	613.5
	0.337	614	612.5	612
	0.338	608.5	613	615.5
	0.339	613	618	615
	0.34	615.5	615	614
	0.341	613.5	615.5	615.5
	0.342	613.5	613.5	615.5
	0.343	614.5	610.5	613.5
	0.344	614	611.5	616
	0.345	614.5	611.5	612.5
	0.346	615.5	609.5	615.5
	0.347	613	611	616
	0.348	612	610.5	616.5
	0.349	610.5	616	616.5
	0.35	612	612.5	617
	0.351	614	613.5	614.5
	0.352	611.5	617.5	613.5
	0.353	614	613.5	616
	0.354	613.5	613.5	617
	0.355	613	612.5	614.5
	0.356	613	613.5	616.5
	0.357	614	614	614
	0.358	615	613.5	617.5
	0.359	614.5	616	615.5
	0.36	615.5	613	614.5
	0.361	615	610.5	614
	0.362	615	616	615.5
	0.363	616.5	614.5	618.5
	0.364	615	615.5	612.5
	0.365	615.5	615	615.5
	0.366	615.5	610.5	616.5
	0.367	615.5	616	615.5
	0.368	614.5	615	614
	0.369	615	614.5	613
	0.37	615.5	611.5	615.5
	0.371	615	612	613
	0.372	614	614	611
	0.373	616	613.5	615.5
	0.374	614	612	616
	0.375	614.5	613.5	615
	0.376	613	613.5	614.5
	0.377	615.5	610	614.5
	0.378	614	615	614
	0.379	615	615	612
	0.38	612	616	613.5
	0.381	615.5	614	615
	0.382	617.5	616.5	614.5
	0.383	614.5	614	613.5
	0.384	613	615.5	615
	0.385	612	615	613.5
	0.386	611.5	616	612.5
	0.387	611	615	615
	0.388	613	613	610
	0.389	614.5	614	615.5
	0.39	612	611.5	612.5
	0.391	612.5	611.5	615.5
	0.392	611	616	615
	0.393	612	612.5	610.5
	0.394	611.5	615	614.5
	0.395	611	616.5	611.5
	0.396	612	616.5	611
	0.397	610.5	614	613
	0.398	616	613	612.5
	0.399	613	616.5	615
	0.4	612	613.5	615
	0.401	612	613.5	610.5
	0.402	610.5	610.5	613.5
	0.403	614.5	616	615
	0.404	613	614.5	613.5
	0.405	613.5	614.5	613.5
	0.406	612	613	614
	0.407	611	614	615.5
	0.408	615	612.5	614
	0.409	614	615	615.5
	0.41	612	614	615
	0.411	615.5	616.5	614.5
	0.412	615.5	615	611.5
	0.413	615	617	614
	0.414	615	615	611.5
	0.415	614	612.5	616.5
	0.416	612.5	616.5	611
	0.417	612.5	615.5	612
	0.418	614.5	612.5	613
	0.419	612	610	612
	0.42	615	613.5	615
	0.421	614	617.5	615
	0.422	611.5	616	613
	0.423	614.5	613.5	614.5
	0.424	613.5	616	615.5
	0.425	615	612.5	612
	0.426	618.5	611	615
	0.427	614	616.5	612.5
	0.428	618.5	617	614
	0.429	614	617	612
	0.43	614	614.5	613
	0.431	616.5	613.5	614.5
	0.432	612	614	612.5
	0.433	616	614.5	613.5
	0.434	615.5	616	614
	0.435	615	614	615.5
	0.436	614.5	614	616
	0.437	615.5	617	613
	0.438	615.5	616.5	614
	0.439	614.5	617.5	614
	0.44	614	615.5	616
	0.441	615.5	611	611.5
	0.442	615.5	612.5	615
	0.443	618.5	615.5	615
	0.444	612	615.5	615.5
	0.445	614.5	612	611
	0.446	615	614	613.5
	0.447	614	612	610
	0.448	616	615	617.5
	0.449	616	613	614.5
	0.45	617	612	613
	0.451	614	610	616
	0.452	613.5	612.5	613
	0.453	615.5	612	612.5
	0.454	614	610	613.5
	0.455	618	610	614
	0.456	616.5	615.5	619
	0.457	615.5	612.5	613
	0.458	616	610	615.5
	0.459	615	610.5	615.5
	0.46	614.5	612.5	612.5
	0.461	617	610	612.5
	0.462	613	611.5	614
	0.463	615	611	612.5
	0.464	611	611.5	613.5
	0.465	610.5	610	615.5
	0.466	614	609.5	614.5
	0.467	611.5	612	614.5
	0.468	612.5	609.5	613.5
	0.469	612	609	615.5
	0.47	608.5	608.5	615
	0.471	608.5	611	615
	0.472	612	612	611.5
	0.473	611	608.5	612
	0.474	608.5	608.5	618.5
	0.475	609	610.5	615
	0.476	613	609.5	610
	0.477	607.5	606.5	613.5
	0.478	608.5	608	616
	0.479	610	608.5	614.5
	0.48	612.5	610	615
	0.481	611.5	610.5	616
	0.482	610.5	609.5	615
	0.483	612	609	612
	0.484	607.5	610.5	614
	0.485	614	612	614.5
	0.486	612.5	611.5	615.5
	0.487	613.5	610	615
	0.488	607.5	609.5	612.5
	0.489	612	608.5	614
	0.49	609	611.5	617.5
	0.491	610	607.5	611
	0.492	610.5	605	615
	0.493	607.5	608.5	616.5
	0.494	609	608.5	618
	0.495	610.5	613.5	615.5
	0.496	611	608	615
	0.497	609	611.5	610.5
	0.498	612.5	609	614
	0.499	610	610	612.5
	0.5	607.5	612	615
	0.501	608.5	612	615
	0.502	611.5	611.5	614.5
	0.503	611.5	609.5	613.5
	0.504	608.5	612	615.5
	0.505	607.5	608.5	613.5
	0.506	612	614	616
	0.507	608.5	612.5	611.5
	0.508	607	612.5	612
	0.509	611	612	615
	0.51	612	609	615
	0.511	612	612.5	615.5
	0.512	612.5	609.5	613
	0.513	607.5	610.5	613.5
	0.514	612	612.5	613.5
	0.515	614	611.5	611
	0.516	608.5	617	615.5
	0.517	609	611	616
	0.518	610	613.5	611
	0.519	610.5	615	613.5
	0.52	611	610	610.5
	0.521	610.5	616	617
	0.522	610	613	615
	0.523	609.5	613	611.5
	0.524	608.5	612.5	614
	0.525	610.5	613.5	615
	0.526	613	616	616.5
	0.527	608.5	616	615.5
	0.528	612.5	611.5	617
	0.529	612	610.5	615.5
	0.53	613.5	612	619
	0.531	607	613.5	615
	0.532	610	615.5	617.5
	0.533	611	616	616
	0.534	608	613	615
	0.535	608.5	612	615
	0.536	610	611	619.5
	0.537	612	614.5	620.5
	0.538	609.5	616	614
	0.539	610	612.5	618
	0.54	611.5	616.5	617
	0.541	609	616	615
	0.542	612.5	612.5	617.5
	0.543	609	616	619
	0.544	608	612	618.5
	0.545	613.5	612.5	618
	0.546	612	614.5	616.5
	0.547	611.5	612	616
	0.548	611.5	614.5	615.5
	0.549	610	613.5	619.5
	0.55	607	614	615.5
	0.551	610.5	612.5	616
	0.552	610	612	619
	0.553	612.5	615.5	614
	0.554	613	612.5	618
	0.555	610.5	612.5	619
	0.556	611	612.5	615.5
	0.557	611	613	614
	0.558	611.5	611.5	615.5
	0.559	612.5	611.5	620.5
	0.56	612	611	617.5
	0.561	612.5	614	617
	0.562	612	615	617
	0.563	615.5	615	616.5
	0.564	614.5	611.5	616
	0.565	613.5	615	615.5
	0.566	614	614	615
	0.567	610.5	611	615.5
	0.568	612	616	618
	0.569	614.5	615	615.5
	0.57	613.5	615	615.5
	0.571	613.5	611	616.5
	0.572	612.5	613.5	615.5
	0.573	617	611.5	614
	0.574	614	612.5	615
	0.575	614.5	615.5	614.5
	0.576	615	614	615
	0.577	616	614.5	616
	0.578	614.5	613	611.5
	0.579	615	617	613
	0.58	614.5	611.5	615.5
	0.581	614.5	613.5	614.5
	0.582	616.5	613	609.5
	0.583	618	613.5	613
	0.584	616	612.5	610.5
	0.585	616	615.5	611
	0.586	614	613	610.5
	0.587	615	612.5	615
	0.588	615.5	617.5	612
	0.589	615	614.5	608
	0.59	611.5	614	607
	0.591	615	616.5	614
	0.592	618.5	615.5	608
	0.593	614	613.5	609.5
	0.594	614	614	613
	0.595	617.5	613.5	610
	0.596	617.5	612.5	610
	0.597	618.5	615.5	610.5
	0.598	612.5	615	611
	0.599	619	615.5	611.5
	0.6	617.5	616	610
	0.601	616	614.5	612
	0.602	616	616	612.5
	0.603	616	616.5	611.5
	0.604	616	612	611
	0.605	615	619.5	613.5
	0.606	616	616	610
	0.607	615	614.5	615
	0.608	614.5	614.5	615.5
	0.609	615.5	615.5	608.5
	0.61	613.5	614	612
	0.611	610	616.5	612.5
	0.612	612.5	615	609.5
	0.613	613.5	613	612.5
	0.614	612.5	617	613
	0.615	615	615	611.5
	0.616	613.5	615	608
	0.617	614.5	616	612.5
	0.618	612	618	613
	0.619	613.5	615.5	615
	0.62	611.5	617.5	613
	0.621	612	611.5	616.5
	0.622	614.5	615.5	615
	0.623	610	615	615.5
	0.624	614	615.5	615.5
	0.625	614.5	616.5	615.5
	0.626	614.5	613	615.5
	0.627	613.5	615	614
	0.628	615.5	611	615.5
	0.629	611.5	613	615.5
	0.63	611	615.5	613
	0.631	613.5	610	614.5
	0.632	613.5	613.5	613
	0.633	614.5	613	615.5
	0.634	613	615.5	614
	0.635	613	616	613
	0.636	613.5	612	614.5
	0.637	615	611.5	613.5
	0.638	612.5	610.5	614
	0.639	609.5	612	616
	0.64	613.5	612	615
	0.641	614.5	613	612
	0.642	613	609.5	612
	0.643	612.5	610	615.5
	0.644	611.5	614	615.5
	0.645	612	612	617
	0.646	611.5	612.5	616.5
	0.647	615.5	611	615.5
	0.648	607.5	613.5	614.5
	0.649	612.5	612.5	613
	0.65	607.5	615	615
	0.651	613	611.5	615
	0.652	611.5	611.5	610.5
	0.653	612.5	610.5	614.5
	0.654	609	611.5	615.5
	0.655	615	612.5	615.5
	0.656	611.5	612	615.5
	0.657	611	609	614
	0.658	613	610	612.5
	0.659	609	615	611
	0.66	611.5	611.5	615.5
	0.661	614	610.5	614
	0.662	612	611.5	612
	0.663	611.5	615	613
	0.664	615.5	612.5	615
	0.665	608.5	614	615.5
	0.666	611	615.5	613
	0.667	612.5	612.5	612.5
	0.668	608.5	613.5	612.5
	0.669	608.5	616.5	612.5
	0.67	611	616	610.5
	0.671	613.5	615	613
	0.672	612	616	613
	0.673	611.5	614	613
	0.674	611.5	617.5	613
	0.675	609.5	618	613.5
	0.676	611.5	614.5	612
	0.677	610	611.5	611
	0.678	610.5	612	611
	0.679	609.5	617.5	610.5
	0.68	611	615.5	606.5
	0.681	612.5	614.5	609.5
	0.682	612	615	608.5
	0.683	614	614	613
	0.684	611.5	612.5	612.5
	0.685	608.5	612	611.5
	0.686	609	617	610
	0.687	613	615	608.5
	0.688	609	615.5	612
	0.689	610.5	617	610.5
	0.69	609	616	610
	0.691	613.5	617	609
	0.692	608.5	613.5	611.5
	0.693	609	616.5	608
	0.694	609.5	619	607
	0.695	608.5	614.5	607.5
	0.696	610.5	620.5	610.5
	0.697	614	616	611
	0.698	612.5	611.5	614
	0.699	608.5	618.5	615
	0.7	614.5	615.5	608.5
	0.701	613	614.5	613
	0.702	611.5	616.5	613
	0.703	609.5	618	614
	0.704	612	618.5	610.5
	0.705	614	616.5	610
	0.706	611.5	618.5	612.5
	0.707	615.5	619.5	611
	0.708	615.5	616	615
	0.709	612	613	613
	0.71	612.5	618.5	614
	0.711	613.5	619.5	614.5
	0.712	613.5	615.5	613
	0.713	610.5	616	613
	0.714	610.5	618.5	609.5
	0.715	612	616.5	610
	0.716	612	615	613.5
	0.717	612	613.5	613.5
	0.718	612.5	618	610.5
	0.719	613.5	613.5	611
	0.72	611.5	613.5	614.5
	0.721	611	616	614
	0.722	616.5	616	618.5
	0.723	612.5	611.5	611.5
	0.724	615.5	615.5	614.5
	0.725	613.5	614.5	611
	0.726	613.5	616	614.5
	0.727	612.5	611.5	615
	0.728	608.5	613.5	617.5
	0.729	611.5	614.5	616
	0.73	613.5	614	615.5
	0.731	615.5	610.5	615.5
	0.732	610	615	615.5
	0.733	614.5	613	614
	0.734	612.5	611	613
	0.735	612.5	613.5	614
	0.736	614	611	612.5
	0.737	614.5	610.5	615
	0.738	615.5	612.5	616.5
	0.739	613	614	612.5
	0.74	611.5	612	614.5
	0.741	612.5	608	615.5
	0.742	613.5	611	616
	0.743	612.5	614	613.5
	0.744	610	612	614.5
	0.745	611	611.5	614.5
	0.746	610.5	611	614
	0.747	613	615	615.5
	0.748	612.5	612	615.5
	0.749	612	609	615
	0.75	613.5	609	613.5
	0.751	611	611.5	615
	0.752	609.5	609	613.5
	0.753	610	609.5	615
	0.754	612.5	609.5	615
	0.755	611.5	610.5	616.5
	0.756	610	609.5	610.5
	0.757	611.5	608.5	611.5
	0.758	613	611.5	611
	0.759	609	611	615
	0.76	611	611	616
	0.761	610.5	614.5	612.5
	0.762	610	613.5	611
	0.763	613	611	613
	0.764	610.5	613.5	614
	0.765	613.5	610	611.5
	0.766	612.5	608	613.5
	0.767	611.5	614	612.5
	0.768	612	611.5	614.5
	0.769	609	610.5	613.5
	0.77	608.5	614	613.5
	0.771	609	614	613.5
	0.772	613	615	613
	0.773	613.5	610.5	615.5
	0.774	611	615.5	615
	0.775	611.5	615.5	613.5
	0.776	611	615.5	615
	0.777	612	614	615.5
	0.778	613.5	615.5	613
	0.779	615	616	615
	0.78	610.5	612.5	609.5
	0.781	612.5	615.5	612
	0.782	614	615.5	612
	0.783	612.5	617.5	614
	0.784	612.5	615.5	611
	0.785	610	615	615
	0.786	611.5	611.5	614.5
	0.787	611.5	611.5	613
	0.788	611	613.5	612.5
	0.789	613.5	615	612
	0.79	612	617	612
	0.791	611.5	613.5	614.5
	0.792	612.5	615.5	611
	0.793	610	615	611.5
	0.794	609	615	611
	0.795	615	613.5	611
	0.796	614.5	613	612
	0.797	612.5	615.5	615
	0.798	610	614.5	614.5
	0.799	611.5	615.5	612.5
	0.8	611.5	615	613
	0.801	611	613.5	614.5
	0.802	612.5	615.5	615
	0.803	614.5	616	612
	0.804	613	612	615
	0.805	612	614.5	613
	0.806	608.5	616.5	615.5
	0.807	614	612.5	611.5
	0.808	612.5	615.5	616
	0.809	615.5	616.5	615
	0.81	608.5	612	611
	0.811	614.5	613.5	616
	0.812	612	613	612.5
	0.813	616.5	613.5	615
	0.814	618	612.5	614
	0.815	611.5	614.5	612
	0.816	615	613.5	615.5
	0.817	611.5	612	612.5
	0.818	610	612	616.5
	0.819	609	613.5	616
	0.82	615	609	615
	0.821	609	612.5	615.5
	0.822	613.5	612	615
	0.823	608.5	609	615.5
	0.824	611.5	607	616.5
	0.825	610.5	611.5	611.5
	0.826	610	611	618.5
	0.827	610	614.5	618.5
	0.828	612	614	615.5
	0.829	614	609.5	620.5
	0.83	612.5	609.5	616
	0.831	611.5	608.5	616.5
	0.832	611.5	609	614.5
	0.833	610.5	612	614.5
	0.834	610.5	609	614.5
	0.835	610	608.5	612
	0.836	615.5	611	617
	0.837	615.5	610.5	615.5
	0.838	614	615.5	616
	0.839	613	610	617
	0.84	610.5	612	615.5
	0.841	613.5	609	615
	0.842	612	610.5	616
	0.843	609	610.5	619.5
	0.844	610.5	612.5	616
	0.845	614.5	610.5	616
	0.846	611.5	615.5	615
	0.847	612.5	611.5	617.5
	0.848	614.5	614	616.5
	0.849	613.5	611	617
	0.85	613.5	615	617.5
	0.851	610	608.5	617
	0.852	614	609.5	615.5
	0.853	612.5	613.5	617
	0.854	614	614.5	619
	0.855	611	613	620.5
	0.856	613	609.5	616
	0.857	611.5	613.5	615.5
	0.858	615.5	612	615.5
	0.859	617	611.5	615.5
	0.86	613	611.5	618.5
	0.861	615	612.5	615.5
	0.862	614	611.5	619
	0.863	614	614.5	614.5
	0.864	613.5	615	617
	0.865	612	613	613.5
	0.866	615.5	612.5	616.5
	0.867	614.5	615	615.5
	0.868	614	612.5	615
	0.869	614.5	611	619
	0.87	613.5	612.5	617.5
	0.871	613	614	610.5
	0.872	613.5	615.5	615.5
	0.873	616	612.5	615.5
	0.874	616	612	617
	0.875	614	611	613.5
	0.876	614.5	614	614
	0.877	611.5	613.5	615
	0.878	611	612.5	615
	0.879	614.5	613.5	615.5
	0.88	615.5	611.5	611.5
	0.881	618.5	615	612.5
	0.882	613.5	614.5	615.5
	0.883	616	614.5	612.5
	0.884	615.5	611.5	616
	0.885	615.5	614	614.5
	0.886	616	615	616
	0.887	618	615.5	616.5
	0.888	616	611.5	614
	0.889	617	613	613
	0.89	614.5	610.5	616.5
	0.891	616	617	614.5
	0.892	617	615.5	618.5
	0.893	615	613.5	613
	0.894	614.5	612.5	616
	0.895	613	614.5	616.5
	0.896	616	612	614
	0.897	616	613.5	614
	0.898	615.5	612	613
	0.899	615	612	615
	0.9	615.5	612.5	613.5
	0.901	613.5	612	611
	0.902	613	614	616
	0.903	613.5	609.5	614.5
	0.904	613.5	614.5	614
	0.905	614	612.5	614.5
	0.906	616	617	615.5
	0.907	615.5	613.5	615
	0.908	615.5	613.5	614
	0.909	615.5	612.5	616
	0.91	614	611	613
	0.911	614	611.5	614
	0.912	612.5	612.5	611.5
	0.913	612.5	615.5	614.5
	0.914	611.5	610.5	615.5
	0.915	610	611	613
	0.916	614.5	616	615
	0.917	608.5	613.5	613
	0.918	614	613.5	615
	0.919	612	616.5	614
	0.92	613	616	614
	0.921	610.5	614	615.5
	0.922	615.5	612	616
	0.923	611	614.5	616
	0.924	613.5	615	616
	0.925	615	612	615.5
	0.926	611.5	615.5	612.5
	0.927	611.5	612.5	615
	0.928	611	615	617.5
	0.929	612.5	613.5	617
	0.93	613	611.5	615
	0.931	610	616.5	615.5
	0.932	612.5	614.5	615.5
	0.933	613	608.5	614.5
	0.934	612	616.5	617
	0.935	611	612	616
	0.936	612	615	617.5
	0.937	611	614	617
	0.938	615	613.5	617.5
	0.939	611	613	616.5
	0.94	612.5	615	615.5
	0.941	612.5	614	619.5
	0.942	612	615.5	617
	0.943	611.5	615	619.5
	0.944	612.5	612.5	614
	0.945	612	612.5	618.5
	0.946	615	614	620.5
	0.947	612.5	613	613.5
	0.948	610.5	614.5	616.5
	0.949	614.5	614	615
	0.95	611.5	617	616.5
	0.951	614.5	615	618
	0.952	612.5	614.5	617.5
	0.953	615	614	616.5
	0.954	614	611.5	617
	0.955	612.5	612.5	617.5
	0.956	611.5	614.5	617
	0.957	613.5	613	616.5
	0.958	616	613	618.5
	0.959	611.5	614.5	614.5
	0.96	614.5	614	617
	0.961	616	615	618.5
	0.962	614.5	612.5	620
	0.963	616	616	617.5
	0.964	615.5	612.5	618
	0.965	612.5	613	617
	0.966	614.5	612	618
	0.967	615	613.5	619.5
	0.968	616.5	612.5	617.5
	0.969	613.5	613.5	618
	0.97	615.5	615	617
	0.971	616.5	615.5	619.5
	0.972	615	616	619.5
	0.973	614.5	616	618
	0.974	617.5	611.5	619.5
	0.975	613	612.5	618
	0.976	614	614	616.5
	0.977	613.5	609.5	616.5
	0.978	615.5	612.5	618.5
	0.979	613	612	620.5
	0.98	615.5	610	618.5
	0.981	615.5	611	615
	0.982	614.5	615.5	616.5
	0.983	614	615.5	622
	0.984	616	611	618.5
	0.985	611	612	616.5
	0.986	614	612.5	618.5
	0.987	614.5	612	615.5
	0.988	612	613	615
	0.989	615	615	618
	0.99	614	612.5	618
	0.991	613.5	612	617
	0.992	616.5	612.5	617.5
	0.993	616.5	611	620
	0.994	615	610	620.5
	0.995	612.5	611	615.5
	0.996	614.5	613.5	617
	0.997	613	608.5	616.5
	0.998	615.5	610.5	613.5
	0.999	615	609.5	616.5
	1	611.5	610	618
	1.001	609	613	617.5
	1.002	614	611.5	614
	1.003	613.5	613.5	619
	1.004	614.5	612.5	613.5
	1.005	612.5	612.5	614
	1.006	611.5	611	616
	1.007	610	612.5	615.5
	1.008	614	612.5	618
	1.009	612.5	615	616.5
	1.01	611.5	610.5	616.5
	1.011	615	612.5	616
	1.012	609.5	614	611.5
	1.013	615	612	617
	1.014	614	614	611
	1.015	609.5	614	615.5
	1.016	611	614.5	613
	1.017	612	614	615.5
	1.018	615	613	616
	1.019	612	610.5	614.5
	1.02	609.5	612.5	616
	1.021	612	615.5	616
	1.022	611.5	611.5	618.5
	1.023	611.5	611.5	615
	1.024	609	612.5	613.5
	1.025	609.5	611.5	613
	1.026	610.5	610.5	615
	1.027	611	615.5	617
	1.028	608.5	611	614
	1.029	612	610	616.5
	1.03	610.5	611.5	613.5
	1.031	614	614.5	617
	1.032	614	610	612.5
	1.033	613.5	609.5	615
	1.034	611	611.5	617
	1.035	611	611	615
	1.036	609.5	611.5	616
	1.037	612.5	610.5	614
	1.038	611.5	614	616
	1.039	613.5	610	613
	1.04	609.5	609	613
	1.041	609.5	608	614
	1.042	614	610	613.5
	1.043	612	608.5	613
	1.044	611.5	609.5	611
	1.045	611.5	613.5	612.5
	1.046	611.5	612.5	613.5
	1.047	615	607.5	612
	1.048	609	610	611
	1.049	610.5	609.5	609
	1.05	610	608	611
	1.051	617	609.5	614.5
	1.052	610	610.5	615
	1.053	611	611.5	612
	1.054	615.5	608	611.5
	1.055	613.5	611	611.5
	1.056	610.5	608.5	609.5
	1.057	609	608.5	609.5
	1.058	613.5	611	611.5
	1.059	613.5	609	610.5
	1.06	614.5	611	610.5
	1.061	613	609.5	608.5
	1.062	615	608.5	610
	1.063	613	612	610.5
	1.064	610.5	613	608.5
	1.065	611.5	610	611.5
	1.066	611	609	611.5
	1.067	613.5	610	609
	1.068	612	608.5	612
	1.069	612	611.5	611.5
	1.07	612.5	610	610.5
	1.071	614	609.5	615
	1.072	612	611	609
	1.073	613	609	613
	1.074	614.5	612	612
	1.075	611.5	608.5	611
	1.076	614	613.5	612.5
	1.077	610.5	608.5	612
	1.078	613	611	612
	1.079	617	614.5	612.5
	1.08	610	610	611
	1.081	614.5	613.5	611.5
	1.082	611.5	612.5	613
	1.083	612	609.5	613
	1.084	612.5	610.5	611
	1.085	612.5	611.5	609.5
	1.086	612.5	612	613.5
	1.087	609.5	614	615
	1.088	612	613	612
	1.089	609.5	611	614
	1.09	613.5	610	615.5
	1.091	610	611	615.5
	1.092	614	613.5	613
	1.093	613	609.5	614
	1.094	612.5	612	616
	1.095	615	611	614
	1.096	614.5	613.5	614.5
	1.097	614.5	612	615
	1.098	609.5	610	614
	1.099	613	611.5	616.5
	1.1	614	608.5	615.5
	1.101	613.5	617	612
	1.102	615.5	608.5	614.5
	1.103	608.5	613.5	615.5
	1.104	611	613.5	615
	1.105	611.5	610.5	612.5
	1.106	614	610.5	614
	1.107	614.5	614	616.5
	1.108	614	612	617
	1.109	613	612	617
	1.11	613.5	611.5	613
	1.111	612.5	614	613.5
	1.112	613.5	612	613.5
	1.113	610.5	610.5	610.5
	1.114	614.5	615.5	611
	1.115	614	612	616
	1.116	612	612	613
	1.117	616	614	614.5
	1.118	612.5	614	611
	1.119	613	613	615
	1.12	615	614	612
	1.121	615.5	615	613.5
	1.122	614.5	614	612.5
	1.123	614	614.5	610.5
	1.124	614.5	615.5	614
	1.125	614.5	612.5	612.5
	1.126	613.5	614.5	614
	1.127	614.5	611.5	612.5
	1.128	616	614	611.5
	1.129	615.5	615.5	610.5
	1.13	613.5	615.5	614
	1.131	612.5	614	610.5
	1.132	614	614	613
	1.133	615	612.5	609.5
	1.134	613	615.5	608.5
	1.135	613.5	613	610.5
	1.136	615	614.5	609.5
	1.137	615	615.5	608
	1.138	615.5	615.5	612
	1.139	615.5	616	606
	1.14	616	614.5	611
	1.141	614.5	615.5	612
	1.142	614	615.5	611
	1.143	614	614.5	611
	1.144	616	613.5	609
	1.145	615	614.5	612.5
	1.146	612.5	615	612
	1.147	617.5	615	608.5
	1.148	615.5	616	610.5
	1.149	614	612.5	609
	1.15	618.5	614.5	608.5
	1.151	615.5	616.5	608
	1.152	614.5	615.5	611.5
	1.153	616	615.5	608.5
	1.154	612.5	616	610.5
	1.155	618	615	608.5
	1.156	618.5	616	608.5
	1.157	615.5	612	611
	1.158	615.5	612.5	607
	1.159	612.5	610	609
	1.16	616.5	614.5	611
	1.161	615.5	613.5	608
	1.162	612	614.5	610
	1.163	617.5	611.5	611
	1.164	616	614	610.5
	1.165	618	613.5	613.5
	1.166	614.5	613.5	607.5
	1.167	612.5	613.5	609
	1.168	616	616	610.5
	1.169	612	614.5	607.5
	1.17	613	616	611.5
	1.171	615.5	615.5	610
	1.172	614	612.5	613.5
	1.173	614	612.5	609.5
	1.174	615.5	610	611.5
	1.175	615.5	612.5	610
	1.176	614	610.5	613
	1.177	613.5	615	611
	1.178	615.5	616	612.5
	1.179	613.5	611.5	612
	1.18	611.5	613.5	608.5
	1.181	610	614.5	613.5
	1.182	613.5	615.5	610
	1.183	613	610	610
	1.184	613	613	612
	1.185	611	615	613.5
	1.186	611.5	612.5	615
	1.187	613	612.5	614.5
	1.188	613	612	613.5
	1.189	614	611.5	614.5
	1.19	612.5	613.5	615
	1.191	613	612	610.5
	1.192	616	613.5	614
	1.193	611	612.5	615.5
	1.194	616	612	612.5
	1.195	609	611.5	612
	1.196	614.5	612.5	615.5
	1.197	613	614.5	612.5
	1.198	612	612	614
	1.199	615	614.5	615
	1.2	615.5	610	611
	1.201	615.5	617	614
	1.202	612	614.5	613.5
	1.203	614.5	612	610.5
	1.204	619.5	613.5	613
	1.205	614	614	612
	1.206	614	614	612.5
	1.207	617.5	615.5	615
	1.208	615.5	612.5	613.5
	1.209	611	612.5	614.5
	1.21	614.5	614	612.5
	1.211	613.5	612	610
	1.212	616	612.5	612.5
	1.213	614.5	612.5	615
	1.214	614	614	611
	1.215	615	614	609.5
	1.216	614	611.5	611.5
	1.217	613	615.5	613
	1.218	616	614.5	614.5
	1.219	614.5	611.5	612
	1.22	613	615	613.5
	1.221	612.5	614.5	612
	1.222	615.5	615.5	612.5
	1.223	613	615	610
	1.224	619	616	612
	1.225	618	615	615.5
	1.226	616.5	612	613
	1.227	615	615.5	612
	1.228	615	612	615.5
	1.229	618.5	616	612.5
	1.23	618.5	615.5	613.5
	1.231	615.5	612	614.5
	1.232	614.5	612	612.5
	1.233	613.5	612.5	613
	1.234	616	614	615
	1.235	616	610	615.5
	1.236	616.5	613.5	614
	1.237	619	618	612
	1.238	618.5	616	615.5
	1.239	619	614.5	614.5
	1.24	616	615	613.5
	1.241	618	619	616
	1.242	620	613.5	614
	1.243	619.5	613.5	613
	1.244	615.5	614.5	616
	1.245	616	614.5	616.5
	1.246	621	613.5	615.5
	1.247	617	614	616.5
	1.248	619.5	613.5	615.5
	1.249	618	613	615.5
	1.25	619	610	615
	1.251	617	613.5	618.5
	1.252	617	613.5	619
	1.253	621.5	615.5	616.5
	1.254	620	613.5	616
	1.255	620.5	611	615.5
	1.256	619	612.5	617
	1.257	620.5	614.5	615.5
	1.258	621.5	615	616
	1.259	621.5	610	615.5
	1.26	621	609.5	616.5
	1.261	623.5	613	617
	1.262	622	611	611
	1.263	623	613	616
	1.264	621.5	613.5	617
	1.265	622.5	613.5	614.5
	1.266	619	614	622
	1.267	623.5	612.5	617
	1.268	619	611	617.5
	1.269	622	614	617.5
	1.27	622	608	619
	1.271	621.5	609.5	615.5
	1.272	622	610.5	619
	1.273	620	611.5	621.5
	1.274	624	615.5	619
	1.275	623.5	615.5	617.5
	1.276	616.5	611	618
	1.277	625	610.5	617
	1.278	619	612.5	617.5
	1.279	621	614.5	615.5
	1.28	618	615.5	615.5
	1.281	620.5	617	614
	1.282	620	610.5	613.5
	1.283	619	614.5	620.5
	1.284	621.5	612.5	615.5
	1.285	622	614	621.5
	1.286	621	611	615.5
	1.287	619	611.5	619
	1.288	620.5	611	614
	1.289	621.5	612	611.5
	1.29	620.5	612	615.5
	1.291	621.5	611	619
	1.292	620.5	612	613
	1.293	615	610.5	615.5
	1.294	615.5	613	615
	1.295	618.5	616	616
	1.296	617.5	613.5	617
	1.297	618.5	614.5	615
	1.298	616	613	618.5
	1.299	617	611.5	616
	1.3	616	617.5	615
	1.301	615.5	611	617
	1.302	615.5	618	616
	1.303	614	612.5	615.5
	1.304	613.5	614.5	615.5
	1.305	620.5	610.5	614
	1.306	613	616	617.5
	1.307	613.5	615	614.5
	1.308	613.5	615.5	615
	1.309	611.5	614.5	615.5
	1.31	614.5	612.5	615.5
	1.311	611.5	613.5	612.5
	1.312	615	615	615.5
	1.313	612	615.5	616.5
	1.314	612.5	616	615.5
	1.315	612.5	615.5	616
	1.316	611	612.5	615
	1.317	612	617.5	615
	1.318	612.5	614.5	615
	1.319	610	615	612
	1.32	609	615.5	615
	1.321	608.5	615	613
	1.322	611	612.5	619
	1.323	610	615	613.5
	1.324	610	615	615
	1.325	614	615.5	615.5
	1.326	608.5	614.5	613.5
	1.327	610	620	616
	1.328	610	614.5	615.5
	1.329	610.5	616	615.5
	1.33	606	615.5	618
	1.331	608	615.5	618
	1.332	612	616.5	616
	1.333	611	616	615.5
	1.334	604	614	616
	1.335	609.5	617	619
	1.336	611	618	617
	1.337	610.5	615	613
	1.338	609	615	619
	1.339	607	614.5	616.5
	1.34	608	615.5	615.5
	1.341	608	615	615
	1.342	605.5	615.5	617.5
	1.343	609	615.5	615.5
	1.344	605.5	613.5	615.5
	1.345	608	615.5	615
	1.346	607	616	611
	1.347	609.5	616	616.5
	1.348	607	616	617
	1.349	610.5	613.5	615
	1.35	607	613	615.5
	1.351	610.5	616	615.5
	1.352	607	614	616.5
	1.353	605	614	616
	1.354	606	618.5	617.5
	1.355	608	611	617.5
	1.356	607	616	614.5
	1.357	608.5	617.5	617
	1.358	605.5	615.5	618.5
	1.359	605.5	615	616
	1.36	604	616	614
	1.361	608.5	617.5	615.5
	1.362	606	615	613.5
	1.363	605	614	614.5
	1.364	602	615	615
	1.365	606.5	616	618
	1.366	604.5	613.5	615
	1.367	604.5	614	615
	1.368	604.5	612.5	614
	1.369	604.5	615	614
	1.37	607.5	615.5	613
	1.371	601.5	615	613
	1.372	604	614	615
	1.373	604	613	614
	1.374	602.5	613	616
	1.375	603.5	615.5	612
	1.376	601.5	616	613.5
	1.377	599.5	614	615.5
	1.378	601.5	618	615.5
	1.379	600.5	615.5	611
	1.38	598.5	616	613
	1.381	600	615.5	615.5
	1.382	598.5	611.5	615.5
	1.383	595	614.5	615.5
	1.384	593	616	613.5
	1.385	595	616.5	615.5
	1.386	598	615	613.5
	1.387	595	616	615.5
	1.388	595.5	614	612.5
	1.389	592	618.5	617.5
	1.39	592	616	614.5
	1.391	588	614.5	613
	1.392	589	618.5	615
	1.393	588.5	614	615
	1.394	589	615	615.5
	1.395	588	613	618
	1.396	588	614.5	614
	1.397	583	614.5	614.5
	1.398	585.5	616	619
	1.399	583	614.5	616
	1.4	581	615.5	614
	1.401	582.5	615	615.5
	1.402	581	615.5	615.5
	1.403	579	609.5	617
	1.404	575.5	615.5	619
	1.405	575.5	616	615.5
	1.406	574.5	615	619.5
	1.407	573	616.5	616
	1.408	571	616	615.5
	1.409	569	612	616.5
	1.41	566.5	616	618.5
	1.411	567.5	614	614.5
	1.412	566	615.5	613.5
	1.413	565.5	616	619
	1.414	564	614.5	617
	1.415	562	614	616
	1.416	563	614.5	616.5
	1.417	562	610.5	614
	1.418	560.5	612.5	613.5
	1.419	562	612.5	619
	1.42	557	615	616
	1.421	557	615	619.5
	1.422	556.5	613	618
	1.423	554	613	615
	1.424	554	613.5	616.5
	1.425	552	615.5	620.5
	1.426	553	615	615
	1.427	551.5	614	619
	1.428	546.5	613	621
	1.429	543	615.5	618
	1.43	543	615	619
	1.431	544.5	616	620
	1.432	540	612	617.5
	1.433	540	612.5	621
	1.434	537.5	612.5	619.5
	1.435	534.5	614.5	619
	1.436	534	613	616
	1.437	534.5	612	615.5
	1.438	528.5	613	616.5
	1.439	531	616.5	617
	1.44	524	615.5	616
	1.441	523	614	618
	1.442	519.5	613	617.5
	1.443	520	614.5	617.5
	1.444	518.5	619	615.5
	1.445	512.5	615	615.5
	1.446	509	615.5	616
	1.447	508	619	619.5
	1.448	505	619	616
	1.449	506	611.5	616
	1.45	500	619	617.5
	1.451	496.5	617	616
	1.452	494	616.5	617.5
	1.453	490.5	617.5	617.5
	1.454	488.5	617.5	619.5
	1.455	483	619.5	618
	1.456	474	618	617.5
	1.457	476	617.5	619
	1.458	471	618	618.5
	1.459	465	614	618
	1.46	463	623.5	621
	1.461	462	617	619
	1.462	455.5	619.5	619
	1.463	449.5	617.5	620
	1.464	443	619.5	618
	1.465	442.5	619.5	615.5
	1.466	435.5	619	621
	1.467	432.5	619	622
	1.468	428	616	621
	1.469	419.5	622	619
	1.47	416.5	621.5	618
	1.471	412.5	619.5	621
	1.472	409.5	619.5	619
	1.473	401	618	622
	1.474	397.5	617	620.5
	1.475	394.5	618.5	621
	1.476	388.5	618.5	613.5
	1.477	384.5	618	622
	1.478	380.5	617.5	617.5
	1.479	370.5	616.5	624.5
	1.48	367.5	616	621.5
	1.481	364	616.5	618.5
	1.482	359.5	618.5	622
	1.483	354.5	616.5	619
	1.484	349.5	620	619.5
	1.485	342	619	616.5
	1.486	339.5	618	622
	1.487	335	618.5	620.5
	1.488	329.5	619	619.5
	1.489	326	620	618
	1.49	319	614.5	622
	1.491	316.5	616.5	622.5
	1.492	306.5	616	621.5
	1.493	303.5	612.5	621.5
	1.494	298.5	618	618
	1.495	294.5	617	619
	1.496	292.5	615	622
	1.497	288.5	616	619
	1.498	281	616.5	622.5
	1.499	280.5	618	623
	1.5	275	614	621
	1.501	273.5	615	621.5
	1.502	266.5	613.5	620
	1.503	263	614	619.5
	1.504	264	618	619.5
	1.505	257.5	614	619
	1.506	257	616	622
	1.507	252.5	615.5	619.5
	1.508	250.5	613.5	621
	1.509	246	612.5	620.5
	1.51	240.5	612	619
	1.511	241	616	620
	1.512	236.5	616	622
	1.513	233	617	620.5
	1.514	235	615	621
	1.515	232	616	621
	1.516	228.5	613.5	622
	1.517	226.5	612.5	620
	1.518	222.5	616	622.5
	1.519	223	613	619
	1.52	219	610	621
	1.521	212.5	613.5	619
	1.522	214	615	622.5
	1.523	214	612.5	618.5
	1.524	211	616	617
	1.525	205.5	613.5	620.5
	1.526	203	612.5	620.5
	1.527	204.5	612	619.5
	1.528	201	617	621.5
	1.529	198	612	620
	1.53	202	614.5	617.5
	1.531	196.5	613	620
	1.532	192	613	618
	1.533	191	611.5	621
	1.534	186	613	615
	1.535	187	611	623
	1.536	187	615.5	622.5
	1.537	181	609	620
	1.538	181.5	609.5	616
	1.539	177.5	617.5	619
	1.54	177.5	612.5	619
	1.541	174	610.5	615.5
	1.542	172	615	616.5
	1.543	169	613.5	616
	1.544	164	613	615.5
	1.545	165.5	613	615.5
	1.546	163.5	612.5	620
	1.547	162	614	615.5
	1.548	154.5	613	615.5
	1.549	155.5	609	616
	1.55	153	614	615.5
	1.551	149.5	615.5	615.5
	1.552	150.5	612	615
	1.553	149.5	616	613
	1.554	140	614	621.5
	1.555	143	613.5	613
	1.556	143.5	615	614.5
	1.557	143	615.5	614.5
	1.558	138	619	614
	1.559	136.5	616.5	616.5
	1.56	136.5	615	617
	1.561	134	616.5	616.5
	1.562	134.5	619.5	615.5
	1.563	130	615.5	619
	1.564	130.5	617.5	617
	1.565	126	616.5	615
	1.566	129	618.5	617
	1.567	127	621.5	619
	1.568	124.5	617	619
	1.569	124	620.5	620.5
	1.57	128	618.5	619
	1.571	125	618	620.5
	1.572	122.5	619	616.5
	1.573	124	621.5	617
	1.574	125.5	621.5	618.5
	1.575	124.5	625	617.5
	1.576	122.5	620.5	617
	1.577	121.5	623.5	619
	1.578	123	623.5	620.5
	1.579	121.5	624.5	622
	1.58	119.5	623.5	619.5
	1.581	121.5	623.5	622
	1.582	121	622	619
	1.583	120	622	617
	1.584	121	623.5	620
	1.585	120.5	622	621.5
	1.586	119.5	626	621
	1.587	118.5	627	619.5
	1.588	117	621	624
	1.589	122	622	620.5
	1.59	120.5	624	623
	1.591	121.5	626.5	624.5
	1.592	123	622	622
	1.593	121.5	623.5	624.5
	1.594	121.5	625	622
	1.595	119	627.5	620
	1.596	121.5	621.5	619
	1.597	123.5	625.5	616
	1.598	120.5	624	619
	1.599	124	624.5	620
	1.6	121.5	626	619
	1.601	124	624.5	620.5
	1.602	127.5	627.5	623.5
	1.603	125	627	621.5
	1.604	129	622	619
	1.605	126.5	624	620.5
	1.606	125	624.5	620.5
	1.607	125	623.5	620.5
	1.608	128.5	619.5	620.5
	1.609	127.5	622	622
	1.61	131.5	624	622
	1.611	131	623.5	622
	1.612	130.5	620.5	621
	1.613	134	625.5	620
	1.614	132.5	620.5	619
	1.615	133.5	621.5	620
	1.616	131.5	623.5	621
	1.617	133.5	617.5	621.5
	1.618	136	619	624
	1.619	137.5	622	620.5
	1.62	138	619.5	619
	1.621	140.5	620.5	619.5
	1.622	138.5	619	620.5
	1.623	137.5	620	618.5
	1.624	138.5	621	622
	1.625	139	621	622.5
	1.626	142	621.5	619
	1.627	140	620.5	620.5
	1.628	140	617.5	617.5
	1.629	145.5	617	619
	1.63	141.5	618	617
	1.631	144.5	616	615
	1.632	144.5	618	616
	1.633	143	616	614.5
	1.634	145.5	615.5	615.5
	1.635	146.5	618	614.5
	1.636	148	616.5	613.5
	1.637	143.5	619.5	614.5
	1.638	147	617	613
	1.639	146.5	616.5	613.5
	1.64	145.5	617.5	611
	1.641	148.5	615.5	611.5
	1.642	149.5	615.5	609
	1.643	148.5	619	612
	1.644	150	617	610
	1.645	153.5	618.5	607
	1.646	154	618	608
	1.647	153	618	607.5
	1.648	155.5	617.5	609.5
	1.649	155.5	620	605.5
	1.65	159.5	621	606.5
	1.651	161	622	610.5
	1.652	160.5	618.5	603.5
	1.653	167.5	615	604.5
	1.654	168.5	618.5	605
	1.655	168	619.5	601.5
	1.656	174.5	622	602
	1.657	177.5	620.5	599.5
	1.658	178	620.5	604
	1.659	184.5	620	600
	1.66	187.5	620.5	598
	1.661	192	619.5	601
	1.662	199	618	597
	1.663	200	620.5	595
	1.664	205	620.5	596.5
	1.665	211.5	621	597
	1.666	217	620.5	597.5
	1.667	221.5	618	600
	1.668	225.5	622	594
	1.669	229.5	621.5	594.5
	1.67	236.5	616	593.5
	1.671	236.5	621	592.5
	1.672	242.5	619	589.5
	1.673	243.5	616	588
	1.674	253	617.5	588
	1.675	256.5	618.5	588
	1.676	263	616	585
	1.677	263.5	616	587
	1.678	271.5	616.5	585
	1.679	276	616	582.5
	1.68	282	614.5	583
	1.681	286.5	616.5	583
	1.682	290.5	612	581
	1.683	295.5	612	585.5
	1.684	299.5	614.5	580.5
	1.685	302.5	609	581
	1.686	309.5	611	582
	1.687	311	611.5	580.5
	1.688	316.5	608.5	575.5
	1.689	321.5	608	574.5
	1.69	324	608	577.5
	1.691	327.5	605.5	574.5
	1.692	333.5	608.5	573.5
	1.693	337	607	572
	1.694	343	608	570.5
	1.695	347	608	573
	1.696	351.5	602.5	571
	1.697	356.5	601.5	569.5
	1.698	362	607	567
	1.699	370.5	602.5	567.5
	1.7	372.5	598.5	565
	1.701	378	602.5	565
	1.702	382.5	598.5	564.5
	1.703	385.5	601.5	565
	1.704	389.5	597.5	562.5
	1.705	397.5	599	560.5
	1.706	399	598.5	559.5
	1.707	406	596.5	561
	1.708	413	596.5	560.5
	1.709	418.5	594.5	555.5
	1.71	425	596.5	559
	1.711	431	589.5	557.5
	1.712	435	592	557.5
	1.713	445.5	591.5	552.5
	1.714	452.5	590	548.5
	1.715	455.5	590	551.5
	1.716	465.5	591	549
	1.717	472	588	549
	1.718	481.5	590.5	553.5
	1.719	489	587	546.5
	1.72	495.5	588	544.5
	1.721	506	585.5	543
	1.722	514.5	584	543.5
	1.723	519.5	585	545.5
	1.724	528.5	584.5	541
	1.725	542.5	586	537
	1.726	544.5	583.5	538
	1.727	553	581.5	535.5
	1.728	566.5	579.5	534.5
	1.729	578.5	580	532
	1.73	585.5	579.5	534
	1.731	593	582	533
	1.732	601.5	577	526.5
	1.733	608.5	576.5	526.5
	1.734	617	576.5	528.5
	1.735	630.5	574.5	525
	1.736	636	572	522
	1.737	644.5	574.5	523
	1.738	652.5	572	517
	1.739	666	573	516
	1.74	672	570	514.5
	1.741	685.5	567.5	512.5
	1.742	692	568.5	506.5
	1.743	707.5	566	502
	1.744	718	565.5	501.5
	1.745	725.5	568	502.5
	1.746	736	567	498.5
	1.747	744.5	560.5	499
	1.748	755	565	492.5
	1.749	764.5	560.5	490
	1.75	774	560	485
	1.751	785	565	483.5
	1.752	795	557	478.5
	1.753	803	554.5	477.5
	1.754	812.5	558.5	472
	1.755	822.5	554.5	469.5
	1.756	833.5	553	464.5
	1.757	839	550	457.5
	1.758	847	552	460.5
	1.759	856.5	547	451
	1.76	869.5	547	448.5
	1.761	877	546	443.5
	1.762	885	545.5	440
	1.763	892.5	541.5	437.5
	1.764	904	540	432
	1.765	912.5	538	429.5
	1.766	921.5	533.5	422.5
	1.767	927	532.5	419
	1.768	937	535	412.5
	1.769	944.5	534.5	408.5
	1.77	946.5	526.5	406.5
	1.771	961	525.5	399.5
	1.772	962.5	523.5	393.5
	1.773	969.5	518.5	392.5
	1.774	975	515	384.5
	1.775	979.5	511	383
	1.776	986	509.5	376
	1.777	989	508	373
	1.778	991.5	505	368
	1.779	994	503.5	359.5
	1.78	998	493.5	353
	1.781	1006	491	353
	1.782	1005	488	348.5
	1.783	1008	481.5	340.5
	1.784	1012.5	482.5	337
	1.785	1019.5	477.5	335.5
	1.786	1020.5	474	329.5
	1.787	1024	466.5	322.5
	1.788	1028	459	322
	1.789	1032.5	455.5	315.5
	1.79	1033	453.5	314.5
	1.791	1038	449	303.5
	1.792	1047.5	443.5	303
	1.793	1048	438	298.5
	1.794	1052	434	297.5
	1.795	1060	428.5	289.5
	1.796	1061	423.5	287
	1.797	1066.5	418	284.5
	1.798	1069	407	283
	1.799	1073.5	403	277
	1.8	1075	402.5	274
	1.801	1079.5	394	273
	1.802	1080.5	387	263.5
	1.803	1080	386.5	261
	1.804	1080.5	378.5	258
	1.805	1089	374.5	253.5
	1.806	1089.5	368	253
	1.807	1088.5	362.5	250
	1.808	1091	354.5	250.5
	1.809	1092.5	352.5	246.5
	1.81	1096	344.5	242.5
	1.811	1099.5	340	237
	1.812	1100.5	335	235.5
	1.813	1105	328.5	236.5
	1.814	1107	326	233
	1.815	1107	321.5	225
	1.816	1111	312.5	223
	1.817	1112	306.5	221.5
	1.818	1118.5	305	212
	1.819	1119	298	214.5
	1.82	1124.5	296.5	210.5
	1.821	1131.5	289	211.5
	1.822	1133	285.5	208
	1.823	1134.5	283	205
	1.824	1137.5	274	203.5
	1.825	1148.5	272.5	198.5
	1.826	1147.5	267.5	200
	1.827	1147.5	262.5	192.5
	1.828	1155.5	259.5	192.5
	1.829	1156.5	256	193.5
	1.83	1157.5	249.5	188
	1.831	1165.5	245	184.5
	1.832	1167.5	242.5	181.5
	1.833	1173	236.5	181.5
	1.834	1178.5	233.5	179.5
	1.835	1185.5	232.5	176
	1.836	1192	225.5	173.5
	1.837	1197.5	225.5	172.5
	1.838	1196.5	222	164
	1.839	1202	215.5	166
	1.84	1212.5	213.5	164
	1.841	1223.5	209	161.5
	1.842	1225	206	159
	1.843	1232	203.5	157
	1.844	1239	200	155
	1.845	1247.5	198	149.5
	1.846	1256	196	153.5
	1.847	1260.5	192.5	149.5
	1.848	1266.5	186.5	145
	1.849	1279	186	142.5
	1.85	1282	185.5	142.5
	1.851	1286.5	182.5	136.5
	1.852	1300.5	180	138
	1.853	1305.5	177.5	133.5
	1.854	1314	175.5	132
	1.855	1318.5	170	134.5
	1.856	1329.5	169.5	129.5
	1.857	1331.5	164	129.5
	1.858	1338	166	124
	1.859	1344	167	127.5
	1.86	1350	157	121.5
	1.861	1360	157.5	120.5
	1.862	1364.5	155	118.5
	1.863	1373.5	150.5	118.5
	1.864	1377	154	119.5
	1.865	1383	150	119.5
	1.866	1386.5	150	114.5
	1.867	1393.5	148.5	116
	1.868	1402.5	145.5	112
	1.869	1405.5	143	114.5
	1.87	1409.5	141	109.5
	1.871	1416.5	138	113
	1.872	1421.5	141.5	109.5
	1.873	1424.5	136.5	108.5
	1.874	1431	139	108
	1.875	1438	132.5	108.5
	1.876	1443	132.5	108
	1.877	1441.5	130.5	108
	1.878	1447	130	108.5
	1.879	1451.5	129.5	106.5
	1.88	1454.5	129	107.5
	1.881	1452.5	129.5	109.5
	1.882	1457	125.5	107.5
	1.883	1458	128	104.5
	1.884	1458	128	108.5
	1.885	1463.5	125	110.5
	1.886	1467.5	123	111
	1.887	1470.5	123.5	108.5
	1.888	1473.5	120	108
	1.889	1475.5	121	108.5
	1.89	1478	123	111
	1.891	1477.5	118.5	108.5
	1.892	1481	121.5	112.5
	1.893	1484	118	113
	1.894	1488.5	117.5	110.5
	1.895	1494	116.5	112
	1.896	1499	117	113
	1.897	1499	114.5	112.5
	1.898	1502	112	116.5
	1.899	1503	113.5	115
	1.9	1508.5	115	116.5
	1.901	1509	114	119.5
	1.902	1505.5	113	116.5
	1.903	1514	111.5	117.5
	1.904	1509.5	114	114.5
	1.905	1513.5	110	119.5
	1.906	1509.5	109.5	124
	1.907	1511	111.5	123
	1.908	1508	110.5	124.5
	1.909	1508.5	112	124
	1.91	1506.5	110.5	126
	1.911	1506.5	113	125
	1.912	1505.5	112.5	128.5
	1.913	1505.5	113	127.5
	1.914	1504.5	112	129.5
	1.915	1505.5	112.5	130.5
	1.916	1509	111.5	129.5
	1.917	1506.5	112.5	132.5
	1.918	1503.5	116	129.5
	1.919	1507.5	110	133.5
	1.92	1511	115	133.5
	1.921	1508.5	121.5	131
	1.922	1511.5	116.5	133
	1.923	1510.5	117	135.5
	1.924	1515.5	118.5	132
	1.925	1509.5	118.5	134.5
	1.926	1508.5	118.5	137
	1.927	1511.5	120.5	138
	1.928	1513	117	137.5
	1.929	1511	123.5	139.5
	1.93	1511.5	124	138
	1.931	1508.5	124.5	140.5
	1.932	1512	122.5	140.5
	1.933	1512	126	137.5
	1.934	1511	126.5	137.5
	1.935	1506.5	128	142
	1.936	1508.5	128.5	143
	1.937	1504.5	132.5	143
	1.938	1506.5	131.5	146
	1.939	1508.5	135.5	143.5
	1.94	1505	136.5	144
	1.941	1504.5	135.5	147
	1.942	1498	136	146.5
	1.943	1501	140	153.5
	1.944	1501.5	138.5	148
	1.945	1495	143.5	155
	1.946	1494.5	145	156
	1.947	1491.5	144	157
	1.948	1488.5	149.5	157
	1.949	1486	149	161.5
	1.95	1483.5	151	165.5
	1.951	1477.5	154.5	168.5
	1.952	1478.5	156	166.5
	1.953	1471	156.5	174.5
	1.954	1469	157	178
	1.955	1469	157	179
	1.956	1458	157	186.5
	1.957	1458	158	189
	1.958	1452.5	161.5	193
	1.959	1452	160	197
	1.96	1449.5	163	200.5
	1.961	1445	162.5	204
	1.962	1436.5	162	210
	1.963	1436	161	213.5
	1.964	1435	164	218
	1.965	1429.5	165	226.5
	1.966	1424	167	226.5
	1.967	1422.5	170.5	232.5
	1.968	1415.5	170	232
	1.969	1411.5	172	240.5
	1.97	1406	172.5	246
	1.971	1401.5	174.5	247.5
	1.972	1401.5	179	256.5
	1.973	1393.5	180	259.5
	1.974	1392	180.5	263.5
	1.975	1384	184.5	269
	1.976	1373	184.5	275.5
	1.977	1375	186	280.5
	1.978	1369.5	191.5	281.5
	1.979	1365	192	286
	1.98	1355.5	195	290.5
	1.981	1352	199.5	297
	1.982	1350	199	300.5
	1.983	1347	202	304
	1.984	1340.5	205	307.5
	1.985	1332.5	207.5	313
	1.986	1330.5	208.5	318.5
	1.987	1325	209.5	324
	1.988	1324	216	328
	1.989	1318.5	212	338.5
	1.99	1312	217	340
	1.991	1308.5	220.5	344
	1.992	1302	222.5	352
	1.993	1300.5	226.5	355.5
[truncated: 5,006 more rows]

## Sheet: G
DataTypeVer2.0	Time	Fz	Fz	Fz
NumberOfData		8000	8000	8000
PreTriggerData		0	0	0
SamplingTime[ms]		1	1	1
DataLabel		B1:CMJ	B2:CMJ	B3:CMJ
DataUnit	sec	N	N	N
	0	680	672.5	678.5
	0.001	678	673.5	679.5
	0.002	680	674.5	675
	0.003	681	674	680.5
	0.004	677.5	673.5	676.5
	0.005	676.5	674	678
	0.006	676	673	677
	0.007	677	677	677.5
	0.008	677	673.5	677.5
	0.009	676	673	678.5
	0.01	676	675.5	675.5
	0.011	674.5	675	677.5
	0.012	677	672	677
	0.013	677	675	678
	0.014	677.5	673.5	677
	0.015	676.5	673.5	678
	0.016	680.5	674.5	678.5
	0.017	676	671.5	677.5
	0.018	676.5	673.5	680.5
	0.019	675.5	677	677
	0.02	676	674.5	681
	0.021	677	674.5	677
	0.022	677	677	678
	0.023	675.5	673.5	674.5
	0.024	678	677	677.5
	0.025	675.5	676	674.5
	0.026	676.5	674.5	680
	0.027	676.5	676.5	678.5
	0.028	676	671.5	679
	0.029	675.5	675	676
	0.03	675.5	676	676
	0.031	677	675	677
	0.032	675	676	678
	0.033	675	673.5	680
	0.034	675.5	676	676
	0.035	677	676	677
	0.036	678.5	676.5	677
	0.037	679.5	674	672
	0.038	677.5	676.5	679
	0.039	677	675	678
	0.04	676.5	678.5	677
	0.041	673.5	674	677
	0.042	674.5	679	676.5
	0.043	676	679	677
	0.044	673.5	676	674
	0.045	677.5	677	674.5
	0.046	671.5	680	675.5
	0.047	677	674.5	677.5
	0.048	676.5	680	677
	0.049	676	677	677
	0.05	671.5	675.5	670
	0.051	678.5	675	676.5
	0.052	675.5	679	673.5
	0.053	676.5	676.5	675
	0.054	675	676.5	676.5
	0.055	676.5	674	673
	0.056	674	673.5	675.5
	0.057	675	679	672
	0.058	675	676.5	672
	0.059	677	675.5	677
	0.06	677.5	673	673
	0.061	675	677	676
	0.062	676.5	673.5	675.5
	0.063	676	677	673.5
	0.064	676.5	677	674
	0.065	676	677	675
	0.066	672.5	680	676.5
	0.067	677	678.5	675.5
	0.068	675	676.5	672.5
	0.069	673.5	676.5	678.5
	0.07	676.5	678	675.5
	0.071	674	678.5	672.5
	0.072	672.5	678	672
	0.073	676.5	676.5	677
	0.074	677	676.5	675
	0.075	674.5	676.5	679
	0.076	670	676.5	676
	0.077	672.5	676.5	673.5
	0.078	674.5	677	674.5
	0.079	674	680.5	676.5
	0.08	676.5	677	678
	0.081	676.5	680	671.5
	0.082	674.5	677	676
	0.083	675.5	674.5	675.5
	0.084	673.5	677.5	672
	0.085	675	675.5	676.5
	0.086	673.5	675.5	676.5
	0.087	674.5	677	676
	0.088	675	678.5	676
	0.089	674.5	675.5	675.5
	0.09	676	677	675.5
	0.091	675.5	677	674.5
	0.092	674.5	675	675
	0.093	676	677	671
	0.094	675.5	675	673.5
	0.095	677	674	678
	0.096	672	677	674
	0.097	675	675.5	676.5
	0.098	679	675.5	673.5
	0.099	673	676	674.5
	0.1	677	677	675
	0.101	676.5	675	675.5
	0.102	675.5	673.5	673.5
	0.103	678.5	678.5	677
	0.104	677	678	679
	0.105	671.5	674.5	673
	0.106	677	677	673
	0.107	676.5	675	675
	0.108	675.5	674.5	675
	0.109	677	678.5	677
	0.11	676	677.5	674
	0.111	674.5	676	676
	0.112	676	677.5	671
	0.113	677	677.5	675
	0.114	674.5	674	672.5
	0.115	677	681	676.5
	0.116	674.5	674.5	672.5
	0.117	676	674.5	674
	0.118	675.5	677	672
	0.119	673.5	678.5	672.5
	0.12	677	677	672
	0.121	674	676.5	677
	0.122	675	681	670.5
	0.123	677	678.5	677
	0.124	676	677	673
	0.125	675	677	673
	0.126	677	681	677
	0.127	674.5	681	672
	0.128	677.5	674.5	673.5
	0.129	670.5	677	677
	0.13	675.5	677	670.5
	0.131	676	676.5	673.5
	0.132	675	677	675
	0.133	674.5	673.5	673.5
	0.134	677.5	677	671
	0.135	675	675.5	673
	0.136	678	675	670
	0.137	677	677	675
	0.138	675.5	676.5	677
	0.139	673.5	681	674.5
	0.14	675.5	673	672.5
	0.141	676.5	677	675
	0.142	676.5	675.5	677
	0.143	678.5	674	673.5
	0.144	673.5	673	673.5
	0.145	673	678	677
	0.146	681	677	673
	0.147	677.5	674.5	677
	0.148	675.5	674	671.5
	0.149	675	677	677
	0.15	676	679	675.5
	0.151	678.5	675	675
	0.152	677	674.5	674
	0.153	677	677	673.5
	0.154	675	678.5	678
	0.155	680.5	675.5	676.5
	0.156	675	677	677
	0.157	673.5	676	673
	0.158	677	675.5	673.5
	0.159	673.5	677	677
	0.16	676.5	674.5	678.5
	0.161	674	676	678
	0.162	677	676.5	679
	0.163	674.5	678	675
	0.164	676.5	676.5	675
	0.165	673.5	678	677.5
	0.166	675.5	677	673.5
	0.167	673.5	678.5	678.5
	0.168	678.5	679	676
	0.169	677.5	680	680
	0.17	675	676.5	677
	0.171	678.5	676.5	675.5
	0.172	675	677	681
	0.173	677	677	678.5
	0.174	678	676	678.5
	0.175	674	679	680
	0.176	674	678.5	679.5
	0.177	676	677	677
	0.178	679	676	678
	0.179	675.5	678	679.5
	0.18	678.5	678.5	679
	0.181	675	674.5	679
	0.182	677	677	678
	0.183	675.5	678.5	678.5
	0.184	675	677	679.5
	0.185	677	677	681
	0.186	678.5	680.5	684.5
	0.187	675.5	679.5	681
	0.188	675.5	680.5	681
	0.189	673	677	676.5
	0.19	676	675	680.5
	0.191	677.5	675	681
	0.192	672	677.5	678
	0.193	675	677.5	681
	0.194	675	680	678
	0.195	682.5	677	678.5
	0.196	674.5	679.5	678
	0.197	676	678.5	677.5
	0.198	678.5	675	681
	0.199	678	680	680
	0.2	676.5	678	680.5
	0.201	679	678	681
	0.202	677	677	680
	0.203	673.5	676.5	679
	0.204	672.5	677	677.5
	0.205	677	677	678
	0.206	673.5	678	683
	0.207	677	677	678
	0.208	676.5	677	677.5
	0.209	672.5	677	681
	0.21	678.5	678	681
	0.211	675.5	678	677
	0.212	677	676.5	681
	0.213	677	679	679
	0.214	675.5	677	679
	0.215	675.5	678	683.5
	0.216	673	679	677.5
	0.217	676	676.5	677.5
	0.218	677.5	678	680
	0.219	675.5	678	680
	0.22	675	679.5	678
	0.221	675.5	676.5	678.5
	0.222	674.5	681	679
	0.223	675.5	675.5	678
	0.224	673.5	679	675
	0.225	673	675.5	681
	0.226	675	680	678
	0.227	673.5	676.5	675.5
	0.228	678	677	676.5
	0.229	677	677	679.5
	0.23	677	676	678.5
	0.231	672.5	680.5	676.5
	0.232	677	674.5	679
	0.233	678.5	678	679
	0.234	676.5	675.5	679.5
	0.235	677.5	676.5	678
	0.236	674.5	677.5	676.5
	0.237	673.5	678.5	677
	0.238	673.5	677	681
	0.239	671	681	674.5
	0.24	677.5	679	676.5
	0.241	674.5	676	675
	0.242	675.5	675.5	675
	0.243	677	676.5	675.5
	0.244	673.5	677	679
	0.245	676.5	679.5	673.5
	0.246	675	677	675
	0.247	677	679	675
	0.248	673	677.5	677
	0.249	674	676	677
	0.25	676.5	678.5	677
	0.251	677	678	677
	0.252	677.5	680.5	677
	0.253	673.5	677.5	675
	0.254	677	676.5	676
	0.255	675	677	675
	0.256	671.5	678.5	677
	0.257	677.5	676.5	678
	0.258	674.5	677	677
	0.259	677.5	679	677
	0.26	675.5	678	678
	0.261	677	677.5	674.5
	0.262	675.5	677	676
	0.263	676.5	671.5	677
	0.264	676	677	681
	0.265	678	675.5	678.5
	0.266	679	673.5	678
	0.267	674.5	676.5	674.5
	0.268	677	676.5	678.5
	0.269	677	675.5	675.5
	0.27	676	677.5	680.5
	0.271	675.5	677	675.5
	0.272	677	675	679
	0.273	676	676.5	680.5
	0.274	679.5	676.5	677
	0.275	672.5	677.5	676.5
	0.276	675.5	675	677.5
	0.277	676	675	678
	0.278	677.5	673.5	676
	0.279	678	674.5	680
	0.28	674.5	673	677
	0.281	677	676.5	678.5
	0.282	677	675	678
	0.283	675.5	677	678
	0.284	678	673.5	676.5
	0.285	676	672.5	679
	0.286	677	674	677.5
	0.287	676	675.5	677
	0.288	679	677	676
	0.289	674	674	677
	0.29	675	672	680
	0.291	676.5	676.5	679
	0.292	675.5	674	678.5
	0.293	674.5	675.5	677
	0.294	676	674	680
	0.295	675.5	675	681
	0.296	675.5	672	680
	0.297	675	675	679
	0.298	675	675.5	677.5
	0.299	673.5	672	677
	0.3	676.5	674	677
	0.301	678	675	678
	0.302	677	673	680
	0.303	675	673.5	680
	0.304	677	673	679
	0.305	679	673.5	678.5
	0.306	675	673.5	678.5
	0.307	677.5	678	680
	0.308	676.5	670	677
	0.309	677	675	678.5
	0.31	672.5	677.5	682.5
	0.311	675	672.5	681
	0.312	675	675.5	680.5
	0.313	677	676	678.5
	0.314	677	675	676.5
	0.315	678	676	678
	0.316	677.5	672.5	680
	0.317	679	675	679
	0.318	675.5	672.5	680.5
	0.319	673	674.5	679
	0.32	676	673.5	680.5
	0.321	679	675	677
	0.322	678	676.5	679.5
	0.323	675.5	670.5	676.5
	0.324	677	676	678
	0.325	677	675	681
	0.326	676.5	672.5	679
	0.327	677	676	677
	0.328	674.5	675.5	679.5
	0.329	679	676.5	678.5
	0.33	677	676	677
	0.331	676.5	677	679
	0.332	679	677	679
	0.333	676.5	676.5	679.5
	0.334	677	678.5	677.5
	0.335	676	671.5	678
	0.336	678.5	675.5	681
	0.337	677	681	679.5
	0.338	676	672	678.5
	0.339	677	675.5	676.5
	0.34	675.5	676.5	678
	0.341	677	676	678
	0.342	678.5	674	678
	0.343	677.5	674.5	676.5
	0.344	678.5	676.5	680
	0.345	678	677	681
	0.346	677	674.5	674
	0.347	678.5	675	681
	0.348	676	674	678.5
	0.349	675	673	677
	0.35	677	675.5	677
	0.351	677.5	677	677
	0.352	678.5	673.5	679
	0.353	677	676.5	677.5
	0.354	678	677	681
	0.355	678	674.5	679
	0.356	675	673.5	676
	0.357	678	677	677
	0.358	679	675.5	677.5
	0.359	678	675	681
	0.36	677	677.5	678
	0.361	675.5	674.5	676
	0.362	676	678	679.5
	0.363	677	673	676.5
	0.364	678	678.5	679
	0.365	675.5	673	677
	0.366	674	678	680
	0.367	675.5	675.5	675
	0.368	677	681	677
	0.369	678	673.5	679
	0.37	677	678	675
	0.371	676.5	677	676.5
	0.372	678	676	678
	0.373	677.5	678	677
	0.374	673.5	676.5	676
	0.375	680.5	678.5	678.5
	0.376	677	679	678
	0.377	677	677.5	677
	0.378	675	674.5	681
	0.379	675	678	673
	0.38	676	677	672.5
	0.381	677.5	680.5	677
	0.382	675	677	676
	0.383	673	678.5	676.5
	0.384	678	678.5	677
	0.385	674	677	673.5
	0.386	679	677	677.5
	0.387	673.5	677	675.5
	0.388	676.5	675.5	676.5
	0.389	676.5	678	677
	0.39	676.5	677	679
	0.391	673	678.5	677
	0.392	673.5	679.5	676.5
	0.393	675.5	678.5	678
	0.394	679	678.5	675
	0.395	674.5	676.5	673
	0.396	678	679	673.5
	0.397	677	679	676.5
	0.398	677	679.5	675
	0.399	678	680.5	677
	0.4	678	676.5	678
	0.401	672.5	681	676
	0.402	677.5	680	678
	0.403	676.5	680.5	674
	0.404	677.5	680.5	672
	0.405	673.5	680	673
	0.406	676.5	681	675
	0.407	675	681	677
	0.408	678	681	676.5
	0.409	675.5	681	675.5
	0.41	677.5	680.5	675.5
	0.411	677	676	675.5
	0.412	673.5	678	677.5
	0.413	678	680	674.5
	0.414	676.5	676	671
	0.415	676.5	681	680
	0.416	678	681	675.5
	0.417	677	681	673.5
	0.418	677	680.5	675.5
	0.419	675	684	677
	0.42	676	678.5	672.5
	0.421	677	681	672.5
	0.422	676.5	676	675
	0.423	678	676.5	672.5
	0.424	676	677	675
	0.425	676	678.5	672.5
	0.426	679	678	676.5
	0.427	675	679.5	678
	0.428	678	680.5	675.5
	0.429	678	680	677
	0.43	671	677	677.5
	0.431	671	678	674.5
	0.432	675.5	677	676
	0.433	675.5	681	674.5
	0.434	674.5	678.5	674
	0.435	678	680	672.5
	0.436	678	681	674.5
	0.437	677	678	675
	0.438	673	678	674.5
	0.439	673	681	672.5
	0.44	676.5	678.5	675.5
	0.441	676	681	673.5
	0.442	680	678	673.5
	0.443	678	676.5	675
	0.444	675	681	673.5
	0.445	674	679.5	671.5
	0.446	675	680	671.5
	0.447	675	677.5	675
	0.448	676.5	678	676.5
	0.449	677	680	676.5
	0.45	676	677	672.5
	0.451	675.5	679.5	678
	0.452	677.5	675.5	676.5
	0.453	672.5	678.5	675
	0.454	679	680.5	676.5
	0.455	678	677	676
	0.456	677.5	675.5	674
	0.457	675.5	677	673.5
	0.458	677	677	672.5
	0.459	674.5	678	678
	0.46	673.5	677	673.5
	0.461	676.5	677	677
	0.462	676	678	675.5
	0.463	677	677	678.5
	0.464	675.5	678	675.5
	0.465	677	681	676.5
	0.466	678	678	675.5
	0.467	677	678	677
	0.468	675	678.5	676
	0.469	679	676	679.5
	0.47	677.5	677	677
	0.471	680	677	674.5
	0.472	680	681	680
	0.473	680	680.5	677
	0.474	677	679	677
	0.475	677.5	678	678
	0.476	677.5	677.5	675
	0.477	681	678.5	677
	0.478	679.5	679	677.5
	0.479	680.5	677	678
	0.48	677	677	679.5
	0.481	676.5	678	673
	0.482	677.5	678.5	676
	0.483	680	679	675.5
	0.484	680	679	677
	0.485	678	676	675.5
	0.486	677	679	675.5
	0.487	679	677.5	675
	0.488	678.5	680	676
	0.489	678	678	677
	0.49	680.5	679.5	681
	0.491	676	676	679
	0.492	676.5	679.5	675.5
	0.493	679	681	679
	0.494	677	676	679
	0.495	678	674	677
	0.496	681	677.5	679.5
	0.497	677	675	673.5
	0.498	679	677	678.5
	0.499	679	677.5	677
	0.5	680	676	677
	0.501	681	677	676.5
	0.502	679	678.5	677
	0.503	681	675.5	676.5
	0.504	680	677.5	675.5
	0.505	680	675.5	678
	0.506	677.5	678.5	673.5
	0.507	679	678	677
	0.508	683	674.5	678.5
	0.509	680.5	678	677.5
	0.51	678	673.5	678.5
	0.511	677.5	678.5	680.5
	0.512	678	677	680
	0.513	680.5	676	680
	0.514	681	679	677.5
	0.515	677.5	672	676
	0.516	680.5	677	676.5
	0.517	677.5	678	676.5
	0.518	680	676.5	677.5
	0.519	681	677	677
	0.52	680.5	674.5	677
	0.521	679	680	678.5
	0.522	678	676.5	675.5
	0.523	683.5	677	674.5
	0.524	680	675.5	677.5
	0.525	681	678	676.5
	0.526	678.5	678	673.5
	0.527	680	673	675
	0.528	679.5	675.5	675.5
	0.529	678.5	676	680.5
	0.53	683	680.5	675
	0.531	678	672.5	677
	0.532	681	678	675
	0.533	677.5	674.5	673.5
	0.534	678.5	679	676.5
	0.535	679.5	675.5	679
	0.536	681	676	680.5
	0.537	679.5	677	675
	0.538	679.5	677.5	678.5
	0.539	679	677	674.5
	0.54	683.5	675	677.5
	0.541	678.5	674.5	680
	0.542	678.5	677	677.5
	0.543	681	675.5	676.5
	0.544	681	676	678
	0.545	679.5	675	675.5
	0.546	677.5	674	672.5
	0.547	678	671	675
	0.548	679.5	679	678
	0.549	683	677	678
	0.55	679	671.5	677
	0.551	686	677	673.5
	0.552	678	678.5	673.5
	0.553	679	678.5	677
	0.554	678	677.5	676
	0.555	678.5	676	678
	0.556	677	678	677
	0.557	680	676	678.5
	0.558	680.5	678	675.5
	0.559	680.5	675	674.5
	0.56	676	674	673
	0.561	680	679.5	675
	0.562	681	676	676
	0.563	681	678	677
	0.564	679	673.5	675.5
	0.565	679	676.5	679
	0.566	679	679.5	676
	0.567	679	677	672
	0.568	681	678.5	676.5
	0.569	677	676.5	675.5
	0.57	679.5	678	675.5
	0.571	680.5	677	673.5
	0.572	680.5	679.5	675.5
	0.573	679	678	669
	0.574	677	681	677
	0.575	679.5	677	676
	0.576	675	679.5	673
	0.577	677.5	676	677.5
	0.578	677	677	678
	0.579	677	676	675
	0.58	677.5	678.5	676
	0.581	677	677	676.5
	0.582	679.5	675.5	674.5
	0.583	679	678	674.5
	0.584	680	677	675
	0.585	679	678.5	677
	0.586	683	678	676
	0.587	681	677	674
	0.588	677.5	673.5	674
	0.589	680	677	671.5
	0.59	677	676.5	675.5
	0.591	678	677	676.5
	0.592	678	677.5	675
	0.593	682	678	677.5
	0.594	679	676.5	674
	0.595	681	676.5	676
	0.596	679	677	674.5
	0.597	681	675.5	675
	0.598	680	674	674.5
	0.599	679	676	677.5
	0.6	677.5	677.5	670.5
	0.601	679.5	678	675.5
	0.602	678	678	678
	0.603	679	674.5	677
	0.604	677	678	676
	0.605	677	677.5	674.5
	0.606	675.5	678	675.5
	0.607	676	677.5	675
	0.608	676.5	678	673
	0.609	678.5	677	673
	0.61	677	677.5	677
	0.611	677.5	675.5	672.5
	0.612	677	677	672.5
	0.613	677	679	673.5
	0.614	677	677.5	672.5
	0.615	678.5	677	672
	0.616	678	677.5	674.5
	0.617	674	675	674.5
	0.618	676	680	672
	0.619	677	678	675.5
	0.62	677.5	676.5	676
	0.621	677	679	675
	0.622	680	678	675
	0.623	672.5	676	671.5
	0.624	674	676.5	676
	0.625	680	674.5	673.5
	0.626	675.5	678.5	673.5
	0.627	677	678	671.5
	0.628	677.5	675.5	676.5
	0.629	678.5	677	673.5
	0.63	678	677	675
	0.631	678	676	673
	0.632	677.5	678	675.5
	0.633	676	679.5	672.5
	0.634	678.5	678	675
	0.635	680.5	675	677
	0.636	680.5	675.5	671.5
	0.637	677	677.5	672.5
	0.638	678.5	679	675.5
	0.639	679.5	678	674.5
	0.64	679	675.5	674
	0.641	675.5	676	676.5
	0.642	681	677	674.5
	0.643	677	678	674
	0.644	678	677	672.5
	0.645	677	677	673.5
	0.646	679	680	674
	0.647	677	679	677.5
	0.648	678	677	676.5
	0.649	675.5	676	670.5
	0.65	677.5	678	675.5
	0.651	677.5	675	670.5
	0.652	679	679	673
	0.653	676	675.5	674
	0.654	680	679	676
	0.655	677	677	673
	0.656	677	677	677.5
	0.657	677	680	674
	0.658	675.5	680	674
	0.659	675	680	673
	0.66	678	678	675
	0.661	681	679.5	675
	0.662	677	675	676.5
	0.663	678	675	673.5
	0.664	677	678	674
	0.665	678	678	675
	0.666	678.5	675.5	672.5
	0.667	678.5	676	673.5
	0.668	677.5	677	672.5
	0.669	676	675.5	672.5
	0.67	676.5	677	674.5
	0.671	676	676.5	677
	0.672	673.5	676	674
	0.673	678.5	677	675
	0.674	676.5	676	677
	0.675	677	678	670
	0.676	676.5	676.5	674.5
	0.677	675.5	674	676.5
	0.678	679	677	677
	0.679	676.5	676.5	674.5
	0.68	675	675.5	670
	0.681	678.5	677.5	674.5
	0.682	677.5	681	677
	0.683	678	677.5	675
	0.684	678	677	676.5
	0.685	677	681	676
	0.686	681	678	674.5
	0.687	679.5	677	676
	0.688	676.5	677	675.5
	0.689	679	679	671
	0.69	680	676	676.5
	0.691	678	676.5	675.5
	0.692	676	678	675.5
	0.693	677	675.5	673.5
	0.694	676	673	676
	0.695	678	676.5	671.5
	0.696	676.5	676.5	674
	0.697	676	675.5	675
	0.698	676.5	679.5	674.5
	0.699	676	674.5	676
	0.7	677	677	675
	0.701	675.5	673.5	675.5
	0.702	677.5	676	675.5
	0.703	678	675	675.5
	0.704	678.5	674.5	672.5
	0.705	677	676	674.5
	0.706	677	677	674.5
	0.707	677	676.5	673.5
	0.708	677.5	673	675.5
	0.709	677	675.5	676
	0.71	680	676.5	673.5
	0.711	675.5	677.5	674.5
	0.712	676	677	674
	0.713	676	677	675
	0.714	677.5	680	673.5
	0.715	678	677	676
	0.716	677	677.5	674
	0.717	678.5	674.5	674
	0.718	680	677	677.5
	0.719	679	677	677
	0.72	678	677	672.5
	0.721	677.5	677	674.5
	0.722	678	679	674
	0.723	677	677	677
	0.724	679	674.5	676.5
	0.725	680	673.5	677
	0.726	679.5	675.5	671
	0.727	681	677	676
	0.728	677	673	674
	0.729	679	676.5	675
	0.73	679.5	677.5	673.5
	0.731	676.5	681	673.5
	0.732	676.5	675	673.5
	0.733	679	675	673.5
	0.734	679	677	672.5
	0.735	674.5	677	678
	0.736	681	677	671.5
	0.737	678	676	675
	0.738	675	677.5	673
	0.739	677	673.5	673.5
	0.74	675.5	675.5	674
	0.741	678	677	671.5
	0.742	678	677	672.5
	0.743	678	676.5	675
	0.744	677	677	674.5
	0.745	678.5	675.5	675.5
	0.746	679.5	679	672
	0.747	678	676.5	671
	0.748	677.5	675	673.5
	0.749	678.5	676	675
	0.75	677.5	675	672.5
	0.751	678	678	671
	0.752	676	680.5	673
	0.753	675.5	674.5	670.5
	0.754	675	674.5	676.5
	0.755	676	678	675.5
	0.756	675.5	671.5	674.5
	0.757	677	676.5	671
	0.758	679	674.5	675
	0.759	675	677.5	671
	0.76	679.5	676.5	671.5
	0.761	679.5	676.5	673.5
	0.762	679.5	677	675
	0.763	678	677.5	672
	0.764	674.5	676	671.5
	0.765	678.5	678	673
	0.766	677.5	675	670.5
	0.767	677	676.5	672
	0.768	679.5	676	672
	0.769	677	673	672
	0.77	682.5	675.5	674
	0.771	677	675.5	670.5
	0.772	673.5	676	670
	0.773	676.5	675.5	670.5
	0.774	677.5	675	674.5
	0.775	678.5	673.5	669
	0.776	677	671.5	670
	0.777	678	673.5	671.5
	0.778	678	674	670.5
	0.779	680	676.5	671.5
	0.78	677	675.5	670.5
	0.781	675.5	673.5	669
	0.782	678	676	671
	0.783	679	678.5	672.5
	0.784	678.5	677	668
	0.785	675.5	675	672.5
	0.786	678.5	673.5	669.5
	0.787	676.5	676.5	670
	0.788	678.5	673	670.5
	0.789	675.5	676	671
	0.79	676.5	670.5	669
	0.791	677	673.5	670.5
	0.792	675.5	671	670
	0.793	675	670.5	670.5
	0.794	678	675.5	672.5
	0.795	679.5	672.5	669.5
	0.796	677.5	673.5	672
	0.797	678	674.5	670
	0.798	678	674.5	671
	0.799	675.5	675	670
	0.8	677	671.5	670
	0.801	677.5	675.5	671.5
	0.802	675.5	672.5	669.5
	0.803	678.5	673	671
	0.804	672.5	670	665
	0.805	675	675	670
	0.806	678.5	673	671.5
	0.807	673	670	671.5
	0.808	679	671.5	674.5
	0.809	677	671.5	670
	0.81	679	671	666
	0.811	676.5	670.5	673
	0.812	679.5	675	671.5
	0.813	674.5	671	672.5
	0.814	674.5	675.5	669.5
	0.815	675.5	672.5	672
	0.816	675.5	673	674
	0.817	677	673	670
	0.818	675.5	676	671.5
	0.819	679	670	671.5
	0.82	677.5	670	672
	0.821	675.5	670	669.5
	0.822	676.5	672.5	671.5
	0.823	676	671	670
	0.824	677	672	670
	0.825	673.5	673	670
	0.826	677.5	672.5	675
	0.827	676	673.5	671.5
	0.828	677	670.5	670.5
	0.829	677	671.5	674
	0.83	675.5	672	670.5
	0.831	675.5	669	673
	0.832	680	673	671
	0.833	681	672.5	670
	0.834	678	672.5	672
	0.835	675.5	671	674.5
	0.836	679.5	674	670.5
	0.837	677	670.5	670.5
	0.838	678	673.5	672
	0.839	676.5	672	675
	0.84	677	673	670.5
	0.841	676	672	674.5
	0.842	678.5	671.5	671
	0.843	676.5	672	671.5
	0.844	676.5	669.5	674.5
	0.845	678	672.5	670.5
	0.846	676.5	671.5	674.5
	0.847	676	672	672
	0.848	678.5	668.5	674
	0.849	679.5	672.5	672.5
	0.85	677	671.5	674.5
	0.851	677	672.5	674.5
	0.852	677	675	671
	0.853	677	672	674.5
	0.854	678	671.5	675
	0.855	678.5	674.5	673
	0.856	675	672.5	671.5
	0.857	676.5	670	674
	0.858	674.5	672	668.5
	0.859	678.5	674.5	670
	0.86	676.5	671	673.5
	0.861	675.5	673.5	666
	0.862	676.5	671.5	671.5
	0.863	677.5	672.5	672.5
	0.864	677	674	674.5
	0.865	676.5	674	673
	0.866	674.5	671.5	671.5
	0.867	674	670.5	674
	0.868	674	677.5	674
	0.869	674.5	673.5	674.5
	0.87	677	673	675.5
	0.871	670	676.5	672.5
	0.872	674.5	673	672.5
	0.873	677	672.5	675
	0.874	675.5	673.5	673
	0.875	672.5	673	670.5
	0.876	673.5	673.5	675.5
	0.877	674	673	674
	0.878	673	669	677
	0.879	674.5	672.5	675.5
	0.88	670	671.5	675.5
	0.881	673.5	671.5	672.5
	0.882	671	673	673.5
	0.883	667	674	675.5
	0.884	675	674.5	672
	0.885	669	677	671
	0.886	673	675.5	671.5
	0.887	672	671	673.5
	0.888	671.5	674	673.5
	0.889	671.5	676.5	673
	0.89	671	672.5	677
	0.891	670	673.5	676
	0.892	673.5	675	674.5
	0.893	668.5	673.5	675
	0.894	669	677.5	673
	0.895	670.5	675	673
	0.896	668.5	671.5	671.5
	0.897	670	671.5	672.5
	0.898	669	676.5	673.5
	0.899	668.5	675.5	673.5
	0.9	670	676.5	673.5
	0.901	669	677.5	672
	0.902	669.5	674.5	673.5
	0.903	672	672	673.5
	0.904	668.5	677	670
	0.905	669.5	675.5	673
	0.906	668.5	673	671.5
	0.907	667.5	676.5	671
	0.908	664	676	670.5
	0.909	667	675.5	671.5
	0.91	669.5	673.5	670.5
	0.911	666	674	671
	0.912	668.5	676.5	672.5
	0.913	670	675.5	671
	0.914	669.5	676	671.5
	0.915	668	674.5	671
	0.916	666	672.5	673
	0.917	670	675	671
	0.918	668	677	671
	0.919	668	673	672
	0.92	667.5	677	670.5
	0.921	669.5	677.5	670.5
	0.922	665	677.5	672
	0.923	670	676.5	672.5
	0.924	669	673.5	671.5
	0.925	668.5	673.5	675
	0.926	669	675.5	669.5
	0.927	671	674.5	673.5
	0.928	670	677	671.5
	0.929	669	677.5	674.5
	0.93	670	675	673
	0.931	675	677	673
	0.932	669	679.5	674.5
	0.933	672.5	676.5	670
	0.934	670	676	672.5
	0.935	670.5	677	671.5
	0.936	670	680.5	676
	0.937	673	674	674.5
	0.938	670.5	673	672
	0.939	670	677	674
	0.94	670.5	675.5	673.5
	0.941	675.5	677	671.5
	0.942	672.5	675.5	672
	0.943	676	677	673
	0.944	674.5	678	676
	0.945	672.5	677	675.5
	0.946	675.5	678	670.5
	0.947	674	677	677.5
	0.948	674.5	674	676
	0.949	676.5	677	674
	0.95	677	675.5	676
	0.951	676.5	678.5	672
	0.952	673.5	678.5	674.5
	0.953	673	677	674.5
	0.954	673.5	674	676
	0.955	674.5	679	675.5
	0.956	675	675	676.5
	0.957	677	679	674
	0.958	673.5	673	676
	0.959	677	676.5	670
	0.96	675.5	674	673
	0.961	677	675	672.5
	0.962	677	675.5	672.5
	0.963	676.5	676	674.5
	0.964	677.5	676	672.5
	0.965	679.5	676	674.5
	0.966	674.5	677.5	674.5
	0.967	680.5	675	677
	0.968	677	675	673
	0.969	677.5	677.5	670.5
	0.97	678.5	676.5	672
	0.971	676.5	676.5	672
	0.972	677	673.5	675
	0.973	677.5	677	673.5
	0.974	679	677	672
	0.975	674.5	677.5	671
	0.976	677	676	674
	0.977	676	676	672.5
	0.978	677	671.5	670
	0.979	672	677	672
	0.98	676.5	674.5	668.5
	0.981	676	675.5	673.5
	0.982	676	674.5	671
	0.983	679	676.5	668.5
	0.984	674	672.5	670
	0.985	677	673	670.5
	0.986	677	673	670
	0.987	679.5	676.5	671.5
	0.988	676	676	670
	0.989	677	673.5	671.5
	0.99	677	676.5	672
	0.991	677	675.5	672.5
	0.992	676	674	673
	0.993	677	674.5	668.5
	0.994	678.5	676.5	671.5
	0.995	677	673	670.5
	0.996	677	672.5	673.5
	0.997	677.5	674	669
	0.998	676	673	672
	0.999	677	672.5	672
	1	679	672	671.5
	1.001	676.5	674	673
	1.002	677	675	675
	1.003	677.5	675.5	674.5
	1.004	674	675	670.5
	1.005	676.5	676	675
	1.006	680	672.5	673.5
	1.007	676.5	674.5	672.5
	1.008	677	673.5	674
	1.009	679.5	673.5	674.5
	1.01	677	675.5	673
	1.011	678	674	673.5
	1.012	677.5	676.5	674
	1.013	677	673	672
	1.014	679.5	676	675.5
	1.015	677.5	671.5	673.5
	1.016	681	673	676
	1.017	679.5	676	673.5
	1.018	679	674.5	675.5
	1.019	679.5	673	673.5
	1.02	677	672.5	671.5
	1.021	680	674.5	678
	1.022	677	677.5	675.5
	1.023	677.5	671	673.5
	1.024	677.5	672.5	676
	1.025	679.5	675.5	678
	1.026	675.5	676.5	675
	1.027	677	675.5	674
	1.028	674	672.5	676
	1.029	676.5	674	672.5
	1.03	680	670.5	678
	1.031	682.5	675	677
	1.032	680	675	671.5
	1.033	678	674.5	676.5
	1.034	680.5	676.5	676
	1.035	678	675.5	677
	1.036	676	674.5	680
	1.037	678	673	677
	1.038	680	675	677
	1.039	677.5	673.5	677
	1.04	677	674	673.5
	1.041	677	675	674
	1.042	678.5	671.5	680
	1.043	678	674	674
	1.044	680	670	673.5
	1.045	679	672.5	679
	1.046	680	669	677.5
	1.047	681	673	673.5
	1.048	676.5	675.5	677
	1.049	676.5	677	672.5
	1.05	681	673	676.5
	1.051	680	672.5	679
	1.052	677	673.5	678
	1.053	675.5	673	677
	1.054	679	676.5	678.5
	1.055	680	673.5	681
	1.056	677	677	676
	1.057	677	677	677
	1.058	678	673.5	677.5
	1.059	678	675	677.5
	1.06	676.5	672	677
	1.061	675.5	671.5	677.5
	1.062	677	672	674.5
	1.063	676	674.5	676
	1.064	677	675.5	676.5
	1.065	676.5	673.5	681
	1.066	675.5	674	678.5
	1.067	676	677	679
	1.068	676	672	676
	1.069	678	676	677
	1.07	677	672.5	677
	1.071	677	673	680
	1.072	681	678.5	677
	1.073	678.5	672	678.5
	1.074	674.5	674	678.5
	1.075	677	672.5	676
	1.076	676	675.5	679
	1.077	677.5	676	680
	1.078	676.5	676	677
	1.079	675.5	677	678.5
	1.08	677	675.5	678
	1.081	679	677	675
	1.082	673.5	676	679.5
	1.083	674.5	674	681
	1.084	677	673	678
	1.085	677	677	678
	1.086	675	676	681
	1.087	673.5	674.5	676
	1.088	677	676	679
	1.089	679.5	673.5	677.5
	1.09	678	674	677
	1.091	675	675.5	681
	1.092	677	676	676
	1.093	675.5	674	677
	1.094	673.5	673.5	676.5
	1.095	674.5	674	678.5
	1.096	677	676.5	680.5
	1.097	670	674	674.5
	1.098	673.5	674.5	677
	1.099	677	677	677
	1.1	677	675.5	679.5
	1.101	673	678.5	678
	1.102	676	674.5	676
	1.103	673.5	676.5	681
	1.104	676.5	676	676.5
	1.105	673.5	678.5	677
	1.106	675.5	674.5	680.5
	1.107	676	679	678
	1.108	673.5	676.5	676
	1.109	675.5	676.5	678.5
	1.11	674	673	674
	1.111	670	674.5	678
	1.112	672	679	679.5
	1.113	672	677	675.5
	1.114	672.5	676	677
	1.115	671	675	679.5
	1.116	672	675.5	676.5
	1.117	672.5	678	678
	1.118	672.5	675	676.5
	1.119	674.5	671.5	677
	1.12	677	680	678
	1.121	670	676.5	676.5
	1.122	672	679	674
	1.123	675	674.5	678.5
	1.124	672	677	676
	1.125	672.5	678.5	675.5
	1.126	668.5	676.5	677
	1.127	672.5	675	676
	1.128	673	677	677
	1.129	675	679	678
	1.13	673	675	677.5
	1.131	675	676	678
	1.132	672	677	675
	1.133	676	675	676.5
	1.134	675	679	675
	1.135	671.5	676.5	676
	1.136	674	677	677
	1.137	671	677	675
	1.138	675	677	677.5
	1.139	675.5	677	676
	1.14	670.5	677	674.5
	1.141	672	675.5	674.5
	1.142	675	677	682.5
	1.143	670	677	677
	1.144	675.5	678	678.5
	1.145	677	677.5	681
	1.146	670.5	676.5	677.5
	1.147	675	678.5	676.5
	1.148	673.5	678	677.5
	1.149	674.5	678	677.5
	1.15	672.5	677.5	676
	1.151	674	680	677
	1.152	674.5	679	674.5
	1.153	674	676.5	678
	1.154	673	676.5	677
	1.155	677.5	677	673
	1.156	677	677.5	671.5
	1.157	676.5	678.5	673.5
	1.158	673.5	678	677.5
	1.159	674.5	674	674.5
	1.16	673.5	678.5	671.5
	1.161	674.5	673.5	674
	1.162	675	677	677
	1.163	677	677	676
	1.164	675	680	673.5
	1.165	674	675.5	671
	1.166	675.5	673	675.5
	1.167	677.5	675	674
	1.168	674.5	676	676.5
	1.169	674.5	678	674
	1.17	674	677	673.5
	1.171	677	674.5	672.5
	1.172	672.5	675	675
	1.173	673.5	674.5	673
	1.174	675.5	677	676.5
	1.175	676.5	676.5	671.5
	1.176	672.5	677	674
	1.177	677	677	672.5
	1.178	677	676.5	675.5
	1.179	677	673.5	673.5
	1.18	676	675.5	669.5
	1.181	673.5	675	675
	1.182	675.5	680.5	672.5
	1.183	676	677	672.5
	1.184	678.5	678.5	674.5
	1.185	674.5	677	673
	1.186	681	678	673
	1.187	677.5	675	677
	1.188	677	681	673
	1.189	673.5	679	673.5
	1.19	681	677.5	673.5
	1.191	676	674.5	673
	1.192	678	672.5	676
	1.193	678.5	678	676.5
	1.194	676	677	674.5
	1.195	676.5	678	677
	1.196	675.5	676.5	671
	1.197	678.5	677	672.5
	1.198	675.5	678	676.5
	1.199	678	678	676
	1.2	677	676	674.5
	1.201	677.5	677.5	676
	1.202	673.5	677	673.5
	1.203	675.5	677.5	675.5
	1.204	675.5	676.5	677
	1.205	676.5	679.5	677
	1.206	676	678.5	676
	1.207	675	677.5	674
	1.208	676.5	679	673
	1.209	677	677	673.5
	1.21	675.5	675	676
	1.211	677.5	678	675.5
	1.212	676.5	681	673.5
	1.213	675	679	674.5
	1.214	678.5	676.5	675.5
	1.215	677	677	676
	1.216	679	680	676
	1.217	673.5	677.5	673
	1.218	671.5	679	674
	1.219	681	677	677.5
	1.22	678	677.5	675
	1.221	675.5	677.5	677.5
	1.222	681	676.5	679
	1.223	679.5	676	678
	1.224	677	677	676
	1.225	677	678	677
	1.226	677	678.5	677.5
	1.227	677	677	679
	1.228	676	675.5	677.5
	1.229	678	675	674
	1.23	680	676.5	677
	1.231	676	674.5	675
	1.232	679	677	676
	1.233	677.5	679	681
	1.234	678	677	679
	1.235	675.5	679	677
	1.236	676	678	678.5
	1.237	673.5	677	677
	1.238	677	678.5	678
	1.239	675.5	678	679.5
	1.24	680	676.5	679
	1.241	676	678.5	678
	1.242	677.5	677	683.5
	1.243	677	680	680
	1.244	676	677.5	677.5
	1.245	680.5	678	681
	1.246	679.5	680	680
	1.247	673	676.5	677
	1.248	676	679	675.5
	1.249	677	675	679
	1.25	679.5	679	680.5
	1.251	680	677	680.5
	1.252	677	681	677
	1.253	676.5	678.5	677.5
	1.254	680.5	677.5	675
	1.255	676.5	681	680
	1.256	677	681	677.5
	1.257	678	674.5	680
	1.258	678	681	677
	1.259	679	677	678.5
	1.26	679	678.5	680.5
	1.261	677.5	678.5	678.5
	1.262	677	677	677
	1.263	676.5	677	681
	1.264	677	678.5	677
	1.265	679	677	682.5
	1.266	679.5	678.5	681
	1.267	675.5	680.5	677
	1.268	679	677	683
	1.269	674.5	678.5	680.5
	1.27	675	677	680
	1.271	679	678.5	679.5
	1.272	675	674.5	679.5
	1.273	679	681	679
	1.274	680	678.5	680
	1.275	675.5	678	677
	1.276	680	676	677
	1.277	675.5	680	679
	1.278	677	681	679.5
	1.279	678	679	679.5
	1.28	678	677	678.5
	1.281	677.5	674.5	677
	1.282	678.5	677.5	678.5
	1.283	677	676.5	680
	1.284	678	675.5	679
	1.285	673.5	676.5	682.5
	1.286	677	676.5	677
	1.287	681	675.5	676.5
	1.288	677	679	677
	1.289	677.5	677.5	680
	1.29	677.5	677.5	677
	1.291	676.5	674	677
	1.292	677.5	679	678
	1.293	679	676	674
	1.294	679	679	674.5
	1.295	680	675.5	679.5
	1.296	679.5	677	679.5
	1.297	673.5	675	674.5
	1.298	676.5	675.5	678
	1.299	681	675	677.5
	1.3	677	674	676
	1.301	677	674.5	679
	1.302	677.5	677	677
	1.303	678	675	677.5
	1.304	679.5	674.5	678.5
	1.305	678	673.5	676.5
	1.306	681	671	677
	1.307	676	674	677.5
	1.308	677	672.5	677.5
	1.309	677	672	680.5
	1.31	677	675	679
	1.311	679.5	671.5	680
	1.312	674.5	673.5	680.5
	1.313	678	672	676
	1.314	675	677	679.5
	1.315	674.5	676	677.5
	1.316	677	674.5	677.5
	1.317	680	675	678
	1.318	677	675.5	678.5
	1.319	678	676	674.5
	1.32	680	676.5	675.5
	1.321	677	672.5	678
	1.322	675	674.5	674.5
	1.323	679.5	675	677
	1.324	677	676	677
	1.325	681	675	681
	1.326	678.5	672.5	677.5
	1.327	681	675	678
	1.328	677	676	681
	1.329	677.5	673.5	677
	1.33	676.5	677.5	676.5
	1.331	678.5	673.5	672.5
	1.332	679.5	673.5	677
	1.333	674.5	673.5	677
	1.334	676	675	676.5
	1.335	677	674.5	678
	1.336	679.5	675.5	678.5
	1.337	675	672	673.5
	1.338	678	675	674
	1.339	680.5	674.5	677
	1.34	678	673.5	675.5
	1.341	681	673.5	676.5
	1.342	676.5	674	676
	1.343	678.5	675.5	676
	1.344	677	675.5	675
	1.345	676	678.5	676.5
	1.346	677.5	676	675.5
	1.347	679	676.5	674.5
	1.348	675	676.5	674.5
	1.349	681	672	675.5
	1.35	679.5	672	676.5
	1.351	679	672	673
	1.352	679.5	673.5	677
	1.353	677	677	675
	1.354	680.5	674.5	673.5
	1.355	678	677.5	676
	1.356	678	675	675
	1.357	679.5	675.5	675
	1.358	681	672.5	671
	1.359	683.5	677	676
	1.36	681	674	675
	1.361	679	675	673.5
	1.362	680	677	676
	1.363	680	674.5	673.5
	1.364	677.5	676	677.5
	1.365	681	678	673
	1.366	678.5	677	675
	1.367	680.5	678.5	673
	1.368	680.5	675	674.5
	1.369	679.5	678.5	670.5
	1.37	678.5	679	672.5
	1.371	681	675	676
	1.372	679	678.5	676.5
	1.373	679.5	676.5	675
	1.374	678	675.5	676
	1.375	680.5	680	676
	1.376	679.5	677.5	675
	1.377	677	675	674
	1.378	677.5	678.5	675.5
	1.379	676.5	677	675
	1.38	678	676.5	674
	1.381	677	677	673.5
	1.382	679	675	676
	1.383	679	674.5	675.5
	1.384	680.5	681	673
	1.385	677	677	671.5
	1.386	677	679.5	673.5
	1.387	677.5	677	675
	1.388	678	677	676
	1.389	679	678	676
	1.39	677	676	676.5
	1.391	677	680.5	677
	1.392	680	679	676
	1.393	679.5	680	674.5
	1.394	673	677	673.5
	1.395	676	678	674
	1.396	677	676	675.5
	1.397	676	677	676.5
	1.398	675	679	674.5
	1.399	675	677.5	674.5
	1.4	676	678.5	674
	1.401	675.5	677	676.5
	1.402	677	675	674.5
	1.403	676.5	679	674
	1.404	675.5	676.5	675
	1.405	675.5	679.5	671.5
	1.406	675	679.5	676
	1.407	676.5	677.5	677.5
	1.408	675	676.5	676
	1.409	677	678	672.5
	1.41	675	676	676
	1.411	675.5	679.5	671.5
	1.412	676.5	679	674
	1.413	674	676.5	675.5
	1.414	673.5	679.5	677.5
	1.415	677	678	677
	1.416	672	678.5	675
	1.417	675	679.5	675.5
	1.418	675.5	680.5	673.5
	1.419	677	676	672.5
	1.42	677	679.5	677
	1.421	677	677	677.5
	1.422	672	677	677
	1.423	676.5	679	677
	1.424	675	678.5	671
	1.425	672	679	672
	1.426	676	677.5	674
	1.427	677	680.5	676.5
	1.428	676.5	680	675.5
	1.429	677	677.5	671.5
	1.43	674.5	677	676
	1.431	676	679	672.5
	1.432	676.5	677.5	677.5
	1.433	672	677	678
	1.434	675	679	673
	1.435	676	678	675
	1.436	670.5	680.5	676
	1.437	677	676.5	674.5
	1.438	674.5	681	678
	1.439	676	681	676.5
	1.44	676	679.5	673.5
	1.441	674.5	677	675
	1.442	673	675	674
	1.443	677	681	677.5
	1.444	676.5	681	674.5
	1.445	675	680	677
	1.446	675.5	677.5	678
	1.447	670.5	681	678.5
	1.448	674	677	678
	1.449	675	679.5	678
	1.45	677	679	676
	1.451	676.5	683	677.5
	1.452	673	684	678
	1.453	677	677	677.5
	1.454	677	679	677.5
	1.455	673.5	677	676
	1.456	679.5	681	677
	1.457	675.5	677.5	679.5
	1.458	674.5	680	677
	1.459	677.5	680	676
	1.46	676	677.5	677
	1.461	677	679.5	679
	1.462	674.5	678	679.5
	1.463	680	679	677
	1.464	679	680	675.5
	1.465	675.5	676	675.5
	1.466	680	680.5	677.5
	1.467	675.5	678	679
	1.468	678	675	675.5
	1.469	676.5	678.5	680
	1.47	677	678.5	678.5
	1.471	677	678.5	677
	1.472	680.5	680	677.5
	1.473	678	681	677
	1.474	678	679	675.5
	1.475	676.5	676.5	672.5
	1.476	677.5	674.5	677
	1.477	677	680	679
	1.478	677	677	677
	1.479	677	677.5	676.5
	1.48	681	677	678.5
	1.481	678.5	675.5	676
	1.482	681	677	676.5
	1.483	677	677	674.5
	1.484	677	678	673.5
	1.485	679	677	675
	1.486	674.5	674.5	672
	1.487	678	679	675
	1.488	678.5	671.5	671
	1.489	678.5	676.5	677
	1.49	678	676	675.5
	1.491	678.5	676.5	676
	1.492	678.5	673	674
	1.493	680	675.5	673.5
	1.494	677	679	675
	1.495	678.5	678.5	675
	1.496	678.5	674.5	674.5
	1.497	676	675.5	676
	1.498	678.5	675.5	673
	1.499	679.5	675	672.5
	1.5	678.5	675.5	676.5
	1.501	681	675	677
	1.502	677	674.5	672.5
	1.503	674	674.5	676.5
	1.504	678.5	674	675
	1.505	676.5	674	671.5
	1.506	679.5	674	673.5
	1.507	677.5	675.5	671.5
	1.508	678	676	675.5
	1.509	679	672.5	672
	1.51	678	676	674
	1.511	677	677	673.5
	1.512	678.5	672.5	674.5
	1.513	678	677	676
	1.514	681	680	675.5
	1.515	678.5	674.5	671.5
	1.516	679	675.5	670.5
	1.517	681	674.5	674
	1.518	677	674	670
	1.519	679	673.5	672.5
	1.52	681	677	673.5
	1.521	679.5	678	677.5
	1.522	679.5	677.5	675
	1.523	674.5	678	675
	1.524	680	675.5	674
	1.525	681	676.5	673.5
	1.526	677	676.5	676
	1.527	677	674.5	674
	1.528	679	677.5	678
	1.529	678.5	674.5	676.5
	1.53	683.5	673.5	675.5
	1.531	681	676.5	678
	1.532	679	677	675
	1.533	681	676.5	676
	1.534	680.5	672.5	677
	1.535	681	673.5	674.5
	1.536	677.5	674.5	680
	1.537	680	678	677
	1.538	681	677.5	677
	1.539	678	677	677
	1.54	679.5	677	677.5
	1.541	675.5	678	678
	1.542	680	677	677
	1.543	678	676	678.5
	1.544	678	676.5	684.5
	1.545	680	675.5	679.5
	1.546	677	677.5	680
	1.547	679	674.5	679.5
	1.548	677.5	678	677
	1.549	681	677.5	677
	1.55	677.5	678	681
	1.551	680.5	677	683
	1.552	681	677	677
	1.553	679.5	678.5	679.5
	1.554	681	678	679
	1.555	679	676.5	679
	1.556	679	673.5	680.5
	1.557	677.5	677	678
	1.558	679	677.5	679
	1.559	679	676.5	680.5
	1.56	680.5	678	684
	1.561	680	681	683
	1.562	680.5	675	683
	1.563	678	679.5	680
	1.564	680.5	677	681
	1.565	677	678.5	681
	1.566	677	681	683
	1.567	680.5	677	681
	1.568	677	678.5	683.5
	1.569	676	676	682.5
	1.57	677	676	680.5
	1.571	678	677	680
	1.572	681	679.5	681
	1.573	679	676	680.5
	1.574	680.5	679	679.5
	1.575	679	674.5	681
	1.576	679	679	681
	1.577	677	679	678
	1.578	677	677.5	677
	1.579	680	677	676.5
	1.58	680	677.5	681
	1.581	679.5	678.5	679
	1.582	679.5	680	679.5
	1.583	677	677	681
	1.584	677	678	681
	1.585	678	677	681
	1.586	677.5	677	681
	1.587	677	676	677.5
	1.588	677	680.5	678.5
	1.589	678	677	677
	1.59	676.5	675.5	678.5
	1.591	677	676.5	680
	1.592	681	680.5	680
	1.593	677	679	679
	1.594	676	676	673
	1.595	674.5	681	681
	1.596	677	678	676.5
	1.597	673.5	677	678
	1.598	678.5	676	676.5
	1.599	675.5	680	676.5
	1.6	677	679.5	675
	1.601	674.5	677	675.5
	1.602	676.5	677	677
	1.603	676	679	677
	1.604	675	679.5	677
	1.605	674.5	679	675
	1.606	676.5	678.5	681
	1.607	677	680	678
	1.608	675	677	678
	1.609	677	678.5	676
	1.61	677	678	679.5
	1.611	674.5	680	676
	1.612	675.5	680	679.5
	1.613	674	681	678.5
	1.614	676	679	680.5
	1.615	677	678.5	673.5
	1.616	677	680	678.5
	1.617	677	681	681
	1.618	677.5	681	676.5
	1.619	676.5	678	677.5
	1.62	679	679	677
	1.621	680	677	677
	1.622	674.5	681	681
	1.623	675	679.5	677
	1.624	674.5	680.5	679.5
	1.625	675.5	681	675
	1.626	677	684	678
	1.627	675	680.5	684
	1.628	676.5	678.5	679
	1.629	675.5	679	679
	1.63	675.5	680	680.5
	1.631	672	677	678.5
	1.632	676.5	680.5	680
	1.633	675	683.5	679
	1.634	670	679.5	681
	1.635	675	682	680.5
	1.636	676	683	684
	1.637	678	684.5	681
	1.638	676.5	680	681
	1.639	676.5	680.5	681
	1.64	676.5	681	680.5
	1.641	676	681	681
	1.642	676.5	679	684
	1.643	675.5	681	681
	1.644	678	680.5	681
	1.645	676	682.5	684.5
	1.646	678	680.5	687
	1.647	677	685	686.5
	1.648	676.5	681	684
	1.649	678	682.5	685.5
	1.65	677	680	681
	1.651	678.5	684	681
	1.652	676.5	681	686
	1.653	677	681	685
	1.654	678	681	680
	1.655	680	685.5	683.5
	1.656	679	681	681
	1.657	676.5	685	685.5
	1.658	676	684	688
	1.659	674.5	683	686
	1.66	675.5	684	685.5
	1.661	679.5	681	686.5
	1.662	681	681	685.5
	1.663	675.5	683	684.5
	1.664	677.5	685	686
	1.665	675	680	687
	1.666	679	687.5	684
	1.667	678	683.5	688
	1.668	677	680.5	686
	1.669	677	683	684
	1.67	677	683	686.5
	1.671	677	684	684
	1.672	676.5	685.5	684
	1.673	676	681	686.5
	1.674	679	681	684
	1.675	677.5	686	683.5
	1.676	675.5	682.5	681
	1.677	676	682.5	684
	1.678	677	681	683.5
	1.679	677.5	684	684
	1.68	671.5	683	684.5
	1.681	675	681	683.5
	1.682	678	685	684
	1.683	676	684	681
	1.684	677	685	683
	1.685	678	684	683
	1.686	675.5	686	681
	1.687	680.5	683.5	681
	1.688	680	685	684
	1.689	680.5	686	681
	1.69	676.5	685.5	682.5
	1.691	676	685	681
	1.692	677.5	684	682.5
	1.693	678	687.5	679
	1.694	680.5	686	683
	1.695	679	683	681
	1.696	679.5	686	680
	1.697	681	684	679.5
	1.698	677	684	681
	1.699	681	686	677
	1.7	677	685	677
	1.701	677	687.5	680.5
	1.702	681	684.5	679
	1.703	678.5	686.5	681
	1.704	679	690.5	680.5
	1.705	681	684	680.5
	1.706	681	686.5	679
	1.707	677.5	681	681
	1.708	675.5	684.5	680.5
	1.709	678	689.5	677
	1.71	677	686	681
	1.711	680	686	678.5
	1.712	680	683.5	678
	1.713	678	686.5	680
	1.714	679.5	684.5	680.5
	1.715	680.5	684.5	677
	1.716	678.5	688.5	681
	1.717	677	688.5	681
	1.718	679	684	680.5
	1.719	680.5	686	682
	1.72	677	688.5	681
	1.721	677.5	683	681
	1.722	677	686	679.5
	1.723	680	684	681
	1.724	678	684.5	678.5
	1.725	681	685	678.5
	1.726	678.5	685	684.5
	1.727	681	686	682
	1.728	684	681	684
	1.729	680.5	683	679.5
	1.73	681	681	686
	1.731	680	685	684
	1.732	681	685	684
	1.733	683	683.5	681
	1.734	677.5	684.5	681
	1.735	680	683	684
	1.736	678.5	686.5	684
	1.737	677.5	687.5	682.5
	1.738	679.5	683.5	681
	1.739	678	684.5	684.5
	1.74	680	682.5	686
	1.741	678.5	684	686
	1.742	675.5	687	683.5
	1.743	681	684.5	684
	1.744	679.5	687	686
	1.745	679	684	683.5
	1.746	680.5	685.5	686.5
	1.747	680.5	683.5	684.5
	1.748	678.5	686	686
	1.749	681	686	686
	1.75	680	686.5	681
	1.751	679	685.5	685.5
	1.752	678	686.5	683
	1.753	681	685	685.5
	1.754	680.5	683.5	686.5
	1.755	676	683	685
	1.756	679	685.5	684.5
	1.757	679	685	684.5
	1.758	677.5	683.5	685
	1.759	677.5	681	686
	1.76	679	684	685.5
	1.761	675.5	686	682.5
	1.762	681	684	687.5
	1.763	676.5	684.5	684.5
	1.764	679.5	686	686.5
	1.765	681	685	684
	1.766	677	687	689.5
	1.767	681	684.5	687
	1.768	681	686.5	684
	1.769	677	684	688
	1.77	681	687.5	691
	1.771	681	685.5	688.5
	1.772	679.5	686.5	686
	1.773	681	686.5	686.5
	1.774	678.5	686.5	688
	1.775	681	687.5	689
	1.776	679.5	686	686.5
	1.777	679.5	690	687
	1.778	677.5	688.5	686
	1.779	679.5	689.5	684.5
	1.78	680.5	684	689.5
	1.781	678.5	689	686
	1.782	679	686.5	684.5
	1.783	681	688.5	689.5
	1.784	680.5	687.5	685
	1.785	678.5	687	688
	1.786	677	688.5	684.5
	1.787	680.5	690.5	687
	1.788	681	687.5	687
	1.789	680.5	688.5	688
	1.79	681	688.5	690.5
	1.791	678	687	684.5
	1.792	679.5	688	688
	1.793	679.5	685	688.5
	1.794	683	683	686.5
	1.795	681	688.5	688.5
	1.796	677.5	690.5	689
	1.797	679.5	687	692
	1.798	679.5	685.5	689.5
	1.799	678.5	683.5	690.5
	1.8	678.5	687.5	688
	1.801	679.5	688.5	693.5
	1.802	684	687.5	692
	1.803	680.5	685.5	690.5
	1.804	679.5	686	695
	1.805	681	686	690.5
	1.806	679.5	680.5	694
	1.807	681	685	693.5
	1.808	681	683.5	693
	1.809	681	686	693.5
	1.81	684	687	696
	1.811	680	684	696
	1.812	683.5	683.5	694.5
	1.813	681	684	697.5
	1.814	680	688	698.5
	1.815	680	684.5	694.5
	1.816	681	685	696
	1.817	680	685	697.5
	1.818	681	685.5	694
	1.819	681	681	696
	1.82	680.5	684	695
	1.821	681	684	696
	1.822	682.5	681	697.5
	1.823	684.5	684	699
	1.824	684	683	698
	1.825	680.5	683	698
	1.826	679.5	685	695
	1.827	681	683.5	703.5
	1.828	684.5	685.5	698
	1.829	684	686.5	697.5
	1.83	683	684.5	700
	1.831	686	680.5	698
	1.832	684	688	703
	1.833	681	685.5	698
	1.834	684	684	700
	1.835	683	681	697.5
	1.836	681	686.5	695
	1.837	683	684	699.5
	1.838	681	685.5	699
	1.839	684	689	697.5
	1.84	681	683	695
	1.841	684	686.5	696
	1.842	684	683.5	701
	1.843	684	683.5	700
	1.844	683	686	697.5
	1.845	681	685.5	696
	1.846	683	691.5	699
	1.847	684.5	688.5	697
	1.848	687	689.5	700
	1.849	685.5	688	698
	1.85	683.5	688	696
	1.851	684	691	697.5
	1.852	681	694.5	697.5
	1.853	684	689.5	696
	1.854	681	687.5	698
	1.855	685	690.5	696
	1.856	684.5	691	697.5
	1.857	684.5	691	695
	1.858	684.5	691.5	696
	1.859	687	690.5	694
	1.86	684.5	695.5	696
	1.861	683	690.5	697.5
	1.862	685.5	692.5	696
	1.863	684	692	696
	1.864	686.5	694.5	696
	1.865	688.5	691	696
	1.866	688	693	696
	1.867	684	695	698.5
	1.868	688	694.5	694
	1.869	684.5	695	697.5
	1.87	689	696	696
	1.871	686	696	693
	1.872	685.5	695	696
	1.873	687.5	698.5	697.5
	1.874	689.5	697.5	696
	1.875	684.5	697.5	696
	1.876	684.5	697.5	696
	1.877	681	695.5	696
	1.878	687.5	697	698.5
	1.879	686	700	696
	1.88	685.5	701	695
	1.881	684	697.5	694.5
	1.882	687	695.5	696
	1.883	685.5	699	696
	1.884	688	700.5	693.5
	1.885	684	703.5	696
	1.886	681	698	694
	1.887	689	701	694
	1.888	685.5	700	695
	1.889	684.5	697.5	694
	1.89	685.5	703	699
	1.891	686.5	696	697
	1.892	686	700	695.5
	1.893	687	699	694
	1.894	684.5	697.5	694
	1.895	685	701.5	696
	1.896	687.5	698	695
	1.897	684	696	692.5
	1.898	685.5	701.5	690.5
	1.899	681	699.5	694
	1.9	685.5	700.5	691
	1.901	685.5	701.5	691
	1.902	683	700	691.5
	1.903	684.5	696	692
	1.904	685.5	698.5	690.5
	1.905	686	700.5	690.5
	1.906	683.5	697.5	688.5
	1.907	688.5	701.5	690.5
	1.908	684	700.5	686.5
	1.909	684.5	701.5	691
	1.91	684.5	702	690.5
	1.911	684.5	702.5	690.5
	1.912	686	698.5	689.5
	1.913	681	702.5	688.5
	1.914	684	699	688.5
	1.915	682.5	699.5	689.5
	1.916	687	696	688.5
	1.917	683.5	699.5	688
	1.918	684	701	684.5
	1.919	684.5	698	686.5
	1.92	685	700	686.5
	1.921	684	697.5	687
	1.922	684.5	698.5	687
	1.923	685	696	686
	1.924	686.5	696	684.5
	1.925	685	697	682.5
	1.926	684	697.5	685
	1.927	685.5	700.5	688.5
	1.928	684	700	688.5
	1.929	683.5	697.5	686
	1.93	683	695.5	688
	1.931	684	695	684
	1.932	686.5	698	686
	1.933	685.5	696	686.5
	1.934	685	695	685
	1.935	683	695	688
	1.936	685	694	686.5
	1.937	684.5	691.5	686.5
	1.938	690	696	688
	1.939	684.5	692	684.5
	1.94	684.5	692	685
	1.941	681	693.5	684
	1.942	681	691.5	686.5
	1.943	683	693	686
	1.944	683	690.5	684
	1.945	683	692	686
	1.946	684	697.5	683.5
	1.947	684.5	690.5	685
	1.948	686	695	680
	1.949	685	690.5	681
	1.95	687	690	684
	1.951	686.5	689.5	686.5
	1.952	687.5	691.5	683
	1.953	687.5	695	681
	1.954	684	690.5	681
	1.955	684	689.5	681
	1.956	685	690.5	679
	1.957	686.5	687.5	681
	1.958	686	690.5	680.5
	1.959	684.5	688.5	681
	1.96	685.5	687	677
	1.961	684	689.5	678.5
	1.962	684	684.5	680
	1.963	684	684	680
	1.964	683.5	686	677
	1.965	686	687.5	677.5
	1.966	683.5	685.5	677
	1.967	686.5	689	679
	1.968	683	683	676
	1.969	683.5	686.5	676.5
	1.97	683.5	687	675
	1.971	687.5	688.5	675.5
	1.972	681	686	676.5
	1.973	678	684.5	673
	1.974	681	688.5	676.5
	1.975	687.5	681	676.5
	1.976	684	686.5	671
	1.977	686.5	681	673.5
	1.978	681	683	674.5
	1.979	684	684.5	670
	1.98	680	683	670.5
	1.981	680	684	675.5
	1.982	684	683.5	671
	1.983	684	683.5	672
	1.984	685	684	671
	1.985	685	684	674.5
	1.986	684	679.5	672
	1.987	684.5	681	669.5
	1.988	683	681	669
	1.989	687.5	684	670
	1.99	683.5	678.5	668.5
	1.991	685.5	676.5	668
	1.992	687	676	668.5
	1.993	687	679	669.5
[truncated: 6,006 more rows]

## Sheet: H
DataTypeVer2.0	Time	Fz	Fz	Fz
NumberOfData		8000	8000	8000
PreTriggerData		0	0	0
SamplingTime[ms]		1	1	1
DataLabel		Z1:CMJ	Z2:CMJ	Z3:CMJ
DataUnit	sec	N	N	N
	0	622	617	622
	0.001	621	616.5	621
	0.002	622	618.5	616.5
	0.003	621.5	619	621.5
	0.004	622	617	621.5
	0.005	622	620.5	620
	0.006	621	614.5	619.5
	0.007	619.5	618.5	621
	0.008	617.5	620.5	622
	0.009	623.5	616.5	615.5
	0.01	619.5	616.5	620
	0.011	621.5	617	619.5
	0.012	624	614.5	619.5
	0.013	620	616	618
	0.014	620.5	618.5	620.5
	0.015	620	620.5	621
	0.016	620.5	616.5	618.5
	0.017	621	617	621
	0.018	623.5	616.5	620.5
	0.019	621.5	618.5	618.5
	0.02	622	616	620.5
	0.021	622	618	621.5
	0.022	621	620	619
	0.023	620.5	613	619.5
	0.024	619.5	617.5	620.5
	0.025	621.5	619	618.5
	0.026	626	618.5	620.5
	0.027	620.5	619	621
	0.028	617.5	615	621
	0.029	616	617.5	622
	0.03	620.5	615.5	616.5
	0.031	620	618	618
	0.032	620.5	617	619.5
	0.033	620.5	617.5	620.5
	0.034	622	621	621
	0.035	622	616.5	618.5
	0.036	622	617	620.5
	0.037	620	617	620.5
	0.038	622	616.5	615.5
	0.039	618.5	616.5	618
	0.04	620.5	619	619
	0.041	620.5	618	616.5
	0.042	621.5	617	618.5
	0.043	621.5	616	622
	0.044	623.5	621	618.5
	0.045	621.5	618.5	617.5
	0.046	622	615.5	618.5
	0.047	622	618	618.5
	0.048	623.5	616.5	618
	0.049	619.5	614	622
	0.05	623.5	618	618
	0.051	622	617	615
	0.052	620.5	616.5	616
	0.053	622	618	618
	0.054	622	618	617
	0.055	623.5	618.5	617.5
	0.056	622	617.5	617.5
	0.057	621	613.5	616.5
	0.058	619.5	616.5	617
	0.059	619.5	617	615.5
	0.06	620.5	619.5	616
	0.061	621.5	617	619.5
	0.062	625	615	621.5
	0.063	621	616.5	617.5
	0.064	622	620.5	616.5
	0.065	624.5	618	622
	0.066	624	617	620.5
	0.067	622	620	618
	0.068	626.5	618	615.5
	0.069	622	618	618.5
	0.07	619	617.5	617
	0.071	622	619	619
	0.072	621	619	615.5
	0.073	621.5	614.5	616
	0.074	623	617.5	616.5
	0.075	621.5	618.5	616
	0.076	622	616.5	616
	0.077	622	616.5	618
	0.078	622	616.5	617.5
	0.079	623	620.5	618.5
	0.08	622	620	617.5
	0.081	618.5	620	620
	0.082	622	616	618
	0.083	623.5	619	618.5
	0.084	622	620.5	615.5
	0.085	625	616.5	618.5
	0.086	624.5	616	622
	0.087	618.5	620	618
	0.088	622	615.5	621.5
	0.089	624	618.5	616
	0.09	624	617.5	616.5
	0.091	621.5	619.5	620
	0.092	622	620	619.5
	0.093	620	615.5	620
	0.094	621	615	616.5
	0.095	624	616	616.5
	0.096	622	618.5	619.5
	0.097	623.5	619	619.5
	0.098	622	614.5	615.5
	0.099	622	620	617.5
	0.1	625	616.5	613.5
	0.101	624.5	620.5	618.5
	0.102	621.5	617	617
	0.103	622	618.5	615.5
	0.104	624.5	619.5	616
	0.105	621.5	616.5	616
	0.106	622	618	613.5
	0.107	621.5	619	618.5
	0.108	623	618	615.5
	0.109	621.5	617	620.5
	0.11	622	620	615.5
	0.111	620	620	617
	0.112	621	618.5	615.5
	0.113	622	619	622
	0.114	620.5	616.5	615.5
	0.115	621.5	620.5	617
	0.116	622	617.5	621
	0.117	621	619	615
	0.118	618	616.5	615
	0.119	621	618.5	618.5
	0.12	621.5	618	621.5
	0.121	619	618.5	619.5
	0.122	620.5	616	618.5
	0.123	622	617	618
	0.124	621	620	618.5
	0.125	620	621	615
	0.126	620	617	620.5
	0.127	620	617.5	616.5
	0.128	620	617.5	615.5
	0.129	617.5	616	615.5
	0.13	619.5	620.5	619
	0.131	621	621	619
	0.132	620.5	619.5	615.5
	0.133	621	620.5	617
	0.134	619.5	616	618.5
	0.135	621.5	615.5	617
	0.136	619	616.5	617
	0.137	619.5	617.5	617.5
	0.138	620	618	618
	0.139	619	621	617.5
	0.14	620.5	619.5	616.5
	0.141	621.5	616.5	616.5
	0.142	621.5	621.5	622
	0.143	619.5	617.5	620.5
	0.144	621.5	615.5	616
	0.145	623.5	618.5	615.5
	0.146	621.5	618	616.5
	0.147	619.5	620	615.5
	0.148	621.5	617	614
	0.149	622	618	615.5
	0.15	621.5	618.5	615.5
	0.151	620.5	614.5	613.5
	0.152	622	621.5	617
	0.153	621	620.5	615.5
	0.154	621.5	617.5	616.5
	0.155	621	616	617.5
	0.156	622	620.5	618
	0.157	620.5	615.5	616
	0.158	623.5	615.5	619
	0.159	622	617.5	617
	0.16	618	616	615.5
	0.161	622	620	614.5
	0.162	622	620	616.5
	0.163	621.5	618.5	618.5
	0.164	622	618.5	616
	0.165	624	617.5	616.5
	0.166	623.5	616.5	619.5
	0.167	621.5	617	617
	0.168	622	615.5	618.5
	0.169	620	616.5	618
	0.17	624.5	617	616
	0.171	620.5	619	616
	0.172	624.5	618.5	617
	0.173	619.5	619.5	616
	0.174	622	617.5	618.5
	0.175	622	617	615.5
	0.176	622	616	616.5
	0.177	622	616	618
	0.178	620.5	617	617.5
	0.179	622	617	618.5
	0.18	622	617.5	620.5
	0.181	622	620.5	619
	0.182	620.5	618.5	619.5
	0.183	620	615	620.5
	0.184	622	617.5	619.5
	0.185	622	618.5	620.5
	0.186	621.5	617.5	616
	0.187	621.5	617	621.5
	0.188	620.5	616.5	619
	0.189	620.5	615	621.5
	0.19	624.5	617.5	617.5
	0.191	621.5	617	622
	0.192	622	615.5	620
	0.193	621	616.5	622
	0.194	622	618	616.5
	0.195	625	618.5	622
	0.196	622	619	620
	0.197	621.5	618	618
	0.198	624	619.5	616
	0.199	625.5	616.5	618.5
	0.2	622	618	621
	0.201	621.5	619.5	619.5
	0.202	622	616	619
	0.203	625.5	615	616.5
	0.204	625.5	617	619.5
	0.205	621	617	618.5
	0.206	620.5	620	621.5
	0.207	624.5	617.5	624
	0.208	624	618.5	618
	0.209	624	617.5	622
	0.21	621	615.5	617
	0.211	624.5	618	621.5
	0.212	622	617	620.5
	0.213	624.5	615.5	615.5
	0.214	622	616	618.5
	0.215	622	617	621
	0.216	620.5	615.5	621.5
	0.217	622	616.5	616
	0.218	626.5	618	619.5
	0.219	625.5	614	620.5
	0.22	622	618.5	622
	0.221	621.5	618.5	621
	0.222	625.5	614.5	619.5
	0.223	622	617.5	619
	0.224	622	612.5	621
	0.225	628.5	613.5	619
	0.226	622	616.5	619
	0.227	622	615.5	621.5
	0.228	622	617	616
	0.229	622	616.5	618.5
	0.23	625	615.5	617.5
	0.231	624	615	622
	0.232	623.5	617.5	619.5
	0.233	621.5	619.5	622
	0.234	620	618.5	622
	0.235	617	616.5	620
	0.236	621	620.5	618.5
	0.237	625	615.5	619
	0.238	627	620	616.5
	0.239	624	617	618.5
	0.24	625	615.5	617
	0.241	621.5	617.5	620.5
	0.242	623.5	613.5	620.5
	0.243	622	615.5	622
	0.244	622	620.5	618.5
	0.245	620	617	620
	0.246	622	618	621.5
	0.247	622	618.5	617.5
	0.248	622	617.5	615.5
	0.249	622	615.5	621.5
	0.25	625	615.5	618.5
	0.251	623.5	616.5	619.5
	0.252	627.5	614.5	621.5
	0.253	624	618.5	620.5
	0.254	624	615.5	619
	0.255	623.5	616	618.5
	0.256	623	615	622
	0.257	622	617.5	615.5
	0.258	622	616.5	619
	0.259	621.5	618	617.5
	0.26	624.5	616.5	621.5
	0.261	621	615	620
	0.262	622	619	620
	0.263	623	618	621
	0.264	625	617	621
	0.265	622	619.5	620.5
	0.266	623.5	616.5	622
	0.267	622	618	620
	0.268	624	620	618.5
	0.269	622	616	617
	0.27	621.5	615	621
	0.271	622	617	615
	0.272	625	619.5	616
	0.273	622	618	617.5
	0.274	622	615	619
	0.275	621	617.5	616.5
	0.276	620	615	621.5
	0.277	622	618.5	617.5
	0.278	622	618	617
	0.279	622	619	617
	0.28	621.5	617.5	615.5
	0.281	622	622	615.5
	0.282	620	615	617
	0.283	620	615.5	619.5
	0.284	620.5	616	615.5
	0.285	621.5	620.5	617
	0.286	622	619.5	619
	0.287	620.5	620.5	618.5
	0.288	621.5	616.5	617.5
	0.289	622	618	614.5
	0.29	620.5	618.5	614
	0.291	619	617.5	617.5
	0.292	622	619.5	618
	0.293	625	619.5	618
	0.294	624.5	618.5	619.5
	0.295	623.5	617.5	618.5
	0.296	619	618.5	618
	0.297	620.5	618	616
	0.298	622	618.5	617
	0.299	622	620	615.5
	0.3	621.5	615.5	616
	0.301	620.5	622	617
	0.302	617.5	615.5	620
	0.303	620	622	619
	0.304	622	620	613.5
	0.305	620.5	620	616
	0.306	622	617	617
	0.307	623.5	620	618
	0.308	619.5	616.5	617
	0.309	620	621	615
	0.31	619.5	617.5	615.5
	0.311	622	622	614
	0.312	622	620.5	616.5
	0.313	622	616.5	615.5
	0.314	617.5	619.5	615
	0.315	620	615.5	617
	0.316	622	618.5	616
	0.317	622	620.5	617
	0.318	621	619.5	615.5
	0.319	621	621.5	615.5
	0.32	618.5	620.5	615.5
	0.321	623	619	612.5
	0.322	618.5	619	615.5
	0.323	620	621	612.5
	0.324	622	620.5	615.5
	0.325	623.5	618	615.5
	0.326	622.5	618.5	613.5
	0.327	621.5	622	613
	0.328	617	622	614
	0.329	620.5	621.5	613.5
	0.33	619	617	615
	0.331	622	618	613
	0.332	621.5	621.5	613
	0.333	620	616	613
	0.334	622	620	612.5
	0.335	621	622	612
	0.336	622	620.5	614.5
	0.337	619.5	621	615
	0.338	619.5	620.5	615
	0.339	622	619	613
	0.34	619.5	623.5	614
	0.341	618.5	622	613
	0.342	621.5	619.5	617
	0.343	619.5	622	613.5
	0.344	620	622	614
	0.345	621.5	624.5	614
	0.346	621	621.5	614
	0.347	620.5	619	611
	0.348	623	620	613.5
	0.349	622	621	613
	0.35	620.5	622	614.5
	0.351	622	620.5	613.5
	0.352	619	620	615.5
	0.353	620.5	618.5	614
	0.354	618	620	614.5
	0.355	619.5	621.5	614.5
	0.356	618.5	622	615
	0.357	620	619	616
	0.358	618	623.5	613
	0.359	622	622	614
	0.36	617.5	622	618
	0.361	620	621	614.5
	0.362	623	622	615.5
	0.363	618	618	616.5
	0.364	618	622	613
	0.365	616.5	619.5	616.5
	0.366	622	621.5	615
	0.367	621.5	621.5	617
	0.368	617	620	617.5
	0.369	617	620.5	615.5
	0.37	617.5	618	617.5
	0.371	622	619.5	617.5
	0.372	618.5	620	615.5
	0.373	617.5	618.5	616
	0.374	618.5	621	619.5
	0.375	619.5	621.5	616.5
	0.376	621	619.5	617.5
	0.377	619.5	622	620.5
	0.378	618.5	618.5	622
	0.379	619	622	615.5
	0.38	621	618.5	617.5
	0.381	621	617	618.5
	0.382	621	621	619
	0.383	620.5	621	616
	0.384	620	620.5	619.5
	0.385	618.5	622	618.5
	0.386	620.5	618	617
	0.387	618.5	619	619
	0.388	621.5	618.5	622
	0.389	621	621	621
	0.39	622	620	618.5
	0.391	618	619.5	619.5
	0.392	619.5	622	618
	0.393	618.5	622	621
	0.394	622	621.5	622
	0.395	622	620	622
	0.396	621	621.5	620
	0.397	617	619.5	617
	0.398	621.5	620.5	619
	0.399	620.5	621.5	619
	0.4	622	618.5	619.5
	0.401	621.5	622	622.5
	0.402	621.5	619	621.5
	0.403	621.5	621	621
	0.404	616.5	620.5	624
	0.405	622	620.5	621.5
	0.406	620	619	619
	0.407	618.5	620	619.5
	0.408	619.5	620	618.5
	0.409	618.5	621	622
	0.41	620.5	619.5	621
	0.411	621.5	618	620.5
	0.412	620	619.5	619.5
	0.413	620	618	622
	0.414	619.5	621	624.5
	0.415	620.5	618.5	621
	0.416	617.5	618.5	620.5
	0.417	621.5	617	621.5
	0.418	621.5	620	622
	0.419	619	617	622
	0.42	621.5	621	621.5
	0.421	618.5	615	620
	0.422	620.5	618.5	620.5
	0.423	620	615.5	617.5
	0.424	621.5	617.5	624
	0.425	617.5	620	623
	0.426	621	618.5	622
	0.427	622	617.5	623.5
	0.428	620.5	615.5	620.5
	0.429	617	616.5	623.5
	0.43	619	617	619.5
	0.431	622	617	622
	0.432	622	616	617
	0.433	620.5	615	620.5
	0.434	620.5	616.5	618.5
	0.435	627	613.5	621
	0.436	621	617.5	622
	0.437	622	615.5	624.5
	0.438	618.5	615	620.5
	0.439	622	618	620.5
	0.44	621.5	617	619.5
	0.441	619.5	615	616.5
	0.442	621.5	615	621.5
	0.443	622	616.5	622
	0.444	624	613.5	622
	0.445	622	613.5	619
	0.446	622	615.5	622
	0.447	622	617.5	618
	0.448	623.5	615.5	619.5
	0.449	622	615	621
	0.45	625	616	620
	0.451	622	617	622
	0.452	622	615.5	623.5
	0.453	623.5	617	620.5
	0.454	623.5	614	619.5
	0.455	623.5	615	616.5
	0.456	621.5	614	620
	0.457	622	614.5	620
	0.458	620	615.5	616.5
	0.459	625	614	621.5
	0.46	619	614	620
	0.461	622	616	619.5
	0.462	621.5	615.5	620.5
	0.463	622	615	619
	0.464	620	615.5	618.5
	0.465	621	611	615.5
	0.466	625	615.5	620.5
	0.467	623.5	616.5	619.5
	0.468	624	615.5	618.5
	0.469	622	611.5	617
	0.47	622	615	621.5
	0.471	620.5	618.5	615.5
	0.472	622	615.5	620.5
	0.473	622	613.5	617
	0.474	624	615.5	616
	0.475	622	615.5	618
	0.476	625.5	613	620
	0.477	623.5	616.5	618
	0.478	625	614	618
	0.479	622	615	615
	0.48	621.5	615.5	616.5
	0.481	624.5	617.5	615
	0.482	625.5	617	615.5
	0.483	622	616.5	615
	0.484	622	616.5	615
	0.485	621	614.5	613
	0.486	622	617.5	619
	0.487	625.5	615.5	617
	0.488	622	614.5	615.5
	0.489	624	615.5	615
	0.49	623.5	617	618
	0.491	624	617.5	614.5
	0.492	622	616	611.5
	0.493	623.5	614.5	617.5
	0.494	622	616.5	617
	0.495	623.5	617	615.5
	0.496	620.5	617.5	615
	0.497	621.5	618.5	615.5
	0.498	620	614.5	615.5
	0.499	622	620	618.5
	0.5	624	616.5	615.5
	0.501	622	613.5	617
	0.502	622	614	617.5
	0.503	622	620	615.5
	0.504	622	615	619
	0.505	624	615	613.5
	0.506	621.5	618.5	617
	0.507	622	615.5	615.5
	0.508	621	614	615
	0.509	625	615.5	613.5
	0.51	624	615.5	618.5
	0.511	619.5	615.5	614
	0.512	622	619.5	617
	0.513	622	616.5	615.5
	0.514	621.5	617	617
	0.515	621.5	614	617.5
	0.516	622	612.5	618
	0.517	621.5	615	615.5
	0.518	620	616	618.5
	0.519	621	615.5	621.5
	0.52	618	617.5	619.5
	0.521	621	615.5	616.5
	0.522	622	615.5	615
	0.523	623.5	614	619.5
	0.524	622	618.5	620
	0.525	622	618	617.5
	0.526	622	619.5	616.5
	0.527	618.5	613	618.5
	0.528	620	614.5	618
	0.529	620.5	618.5	620.5
	0.53	621.5	616.5	619
	0.531	620.5	618.5	619.5
	0.532	622	616.5	620.5
	0.533	623	616	620.5
	0.534	619	618	615
	0.535	622	619	617.5
	0.536	617.5	617.5	619.5
	0.537	622	618	621
	0.538	618.5	618.5	619.5
	0.539	621	620	621.5
	0.54	621.5	621	620
	0.541	622	614.5	616.5
	0.542	617.5	618.5	616.5
	0.543	624	617.5	619
	0.544	622	616	618.5
	0.545	625.5	617	619.5
	0.546	622	620	620
	0.547	622	621	621
	0.548	623	616.5	618
	0.549	619.5	618	619.5
	0.55	621.5	623.5	622
	0.551	620	620	615.5
	0.552	622	617	617
	0.553	621	621	617
	0.554	621	617.5	618.5
	0.555	623.5	620	616.5
	0.556	622	619.5	619.5
	0.557	621.5	618	618
	0.558	620	618.5	615.5
	0.559	621	619.5	620.5
	0.56	619	622	615
	0.561	621	618	619.5
	0.562	621	618	616.5
	0.563	626	620.5	619.5
	0.564	622	619	615
	0.565	620.5	621.5	620.5
	0.566	622	618.5	618
	0.567	620.5	618.5	621
	0.568	620.5	619.5	620.5
	0.569	617.5	618.5	615
	0.57	618	622	618.5
	0.571	621.5	621.5	614.5
	0.572	621	619	617.5
	0.573	621	622	617
	0.574	622	621.5	614.5
	0.575	622	620	614
	0.576	622	619	617
	0.577	622	616.5	617.5
	0.578	622	620	619.5
	0.579	619.5	617.5	617.5
	0.58	620	619.5	620
	0.581	620	622	618
	0.582	623.5	618	620.5
	0.583	621	619.5	616
	0.584	622	621.5	617
	0.585	622	617.5	615.5
	0.586	622	624	616.5
	0.587	621.5	619.5	615.5
	0.588	619	618.5	617
	0.589	621.5	622	616
	0.59	619	619	614
	0.591	620	618.5	619
	0.592	620.5	618	619
	0.593	620	618.5	619
	0.594	619	621.5	618.5
	0.595	622	618.5	618.5
	0.596	622	621	617
	0.597	619	618.5	619.5
	0.598	621	617	617
	0.599	620.5	621.5	617.5
	0.6	617.5	621	615
	0.601	622	616	615.5
	0.602	622	617	615.5
	0.603	621	619.5	615.5
	0.604	622	619.5	619
	0.605	620.5	622	621
	0.606	619.5	618	617.5
	0.607	621	616.5	619
	0.608	622	618.5	616.5
	0.609	622	617.5	621.5
	0.61	622	621	619
	0.611	620.5	621	622
	0.612	621.5	618	619.5
	0.613	619.5	617.5	621.5
	0.614	621.5	616	619
	0.615	620.5	617.5	622
	0.616	619.5	618.5	625
	0.617	621	618.5	619.5
	0.618	618.5	621	621
	0.619	619.5	617	620.5
	0.62	617	617.5	621.5
	0.621	621.5	615	624
	0.622	621.5	617	623.5
	0.623	618	617	622
	0.624	621	618	616.5
	0.625	624	616.5	620
	0.626	624.5	616	619.5
	0.627	623	617.5	618.5
	0.628	620.5	619	621.5
	0.629	622	617	618
	0.63	621	617	616.5
	0.631	623.5	616.5	620
	0.632	620.5	618	621
	0.633	622	615.5	626
	0.634	621.5	615.5	622
	0.635	620.5	619	620.5
	0.636	618	613.5	620
	0.637	623.5	617	619.5
	0.638	621	615	616.5
	0.639	622	617	619
	0.64	622	616.5	620
	0.641	626	616	617.5
	0.642	626	617.5	620
	0.643	622	613.5	618.5
	0.644	623	617	617
	0.645	624	616.5	621
	0.646	622	620	619.5
	0.647	626	617	619
	0.648	623.5	618	619.5
	0.649	624	616	618.5
	0.65	622	616	616.5
	0.651	619.5	616.5	617.5
	0.652	622	615	618.5
	0.653	622	618.5	619.5
	0.654	625.5	614	620.5
	0.655	622	618.5	617
	0.656	620.5	617.5	617
	0.657	622	615.5	618.5
	0.658	624.5	615.5	618.5
	0.659	623.5	618.5	615.5
	0.66	622	617	616.5
	0.661	624	618.5	619
	0.662	625	616.5	618
	0.663	625.5	620	618.5
	0.664	621	619	616
	0.665	621.5	616.5	616.5
	0.666	623	617.5	618
	0.667	621	616.5	615.5
	0.668	621	619	617
	0.669	620.5	617.5	617.5
	0.67	622	619.5	617
	0.671	621	615.5	616
	0.672	623.5	617.5	616.5
	0.673	624.5	621	616
	0.674	622	617	615.5
	0.675	621	618	619
	0.676	622	618	615.5
	0.677	621	617	615.5
	0.678	622	618.5	616.5
	0.679	619.5	621.5	616
	0.68	624.5	621.5	614.5
	0.681	622	618	616
	0.682	621.5	619.5	616.5
	0.683	620.5	615.5	614.5
	0.684	625	615.5	615
	0.685	620.5	618	614.5
	0.686	624.5	616.5	618
	0.687	622	617	615
	0.688	622	619.5	620.5
	0.689	622	620.5	616.5
	0.69	618.5	617	615
	0.691	621	617.5	618.5
	0.692	622	620	615.5
	0.693	619	618.5	613
	0.694	619	618	615.5
	0.695	622	615.5	616.5
	0.696	622	620.5	616.5
	0.697	620.5	619	616
	0.698	620	621.5	618
	0.699	621	621	615.5
	0.7	621	621.5	613
	0.701	616.5	617	615.5
	0.702	618	620	616
	0.703	621	619.5	615.5
	0.704	618	616.5	615
	0.705	620	620.5	612
	0.706	623.5	618.5	616.5
	0.707	619.5	615.5	615
	0.708	622	622	618
	0.709	619.5	619	615.5
	0.71	621	620	617
	0.711	622	618.5	616.5
	0.712	619.5	616	615.5
	0.713	621.5	620.5	617
	0.714	619.5	621	618.5
	0.715	621.5	616.5	618
	0.716	620	621	615
	0.717	620.5	620.5	619
	0.718	620.5	618.5	617.5
	0.719	623	618.5	616
	0.72	619.5	620.5	618.5
	0.721	620.5	616.5	616
	0.722	622	619.5	619.5
	0.723	619.5	620	613.5
	0.724	620	616	619
	0.725	621	617.5	617.5
	0.726	619.5	619	617
	0.727	619.5	617.5	615.5
	0.728	621.5	617.5	620
	0.729	619.5	616.5	614.5
	0.73	622	620.5	616.5
	0.731	620.5	618	620
	0.732	620.5	615.5	617
	0.733	618.5	616	615.5
	0.734	621.5	617.5	618.5
	0.735	619.5	618	613
	0.736	622	618.5	620.5
	0.737	618.5	616	618.5
	0.738	622	617	616
	0.739	622	618.5	618
	0.74	622	614.5	617.5
	0.741	620.5	619.5	615.5
	0.742	622	619	618
	0.743	622	619.5	616.5
	0.744	622	616.5	616
	0.745	622	618	618.5
	0.746	622	618.5	620.5
	0.747	622	618	617
	0.748	620	617	615.5
	0.749	619	615	616
	0.75	623.5	617.5	620
	0.751	618	617	618.5
	0.752	624	618.5	622
	0.753	622	621	618
	0.754	623	615	618.5
	0.755	620	617.5	618
	0.756	624	619.5	619.5
	0.757	624	615.5	617
	0.758	621.5	618.5	617
	0.759	622	615	616.5
	0.76	621.5	616	618.5
	0.761	622	617.5	618
	0.762	620.5	618.5	619.5
	0.763	622	617	617
	0.764	621.5	618.5	617
	0.765	622	618.5	622
	0.766	620.5	617	621.5
	0.767	620.5	618	616.5
	0.768	624.5	619.5	617.5
	0.769	619.5	618.5	619.5
	0.77	619.5	618.5	617.5
	0.771	622	617	616.5
	0.772	620.5	618	620.5
	0.773	622	615.5	619.5
	0.774	620	614.5	620.5
	0.775	621.5	615	618.5
	0.776	619.5	615.5	622
	0.777	621	616	618.5
	0.778	619	616	620
	0.779	620	619.5	619
	0.78	622	619.5	619
	0.781	622	616.5	617.5
	0.782	621.5	618.5	621.5
	0.783	618	619.5	619
	0.784	622	613.5	620.5
	0.785	619.5	615.5	620.5
	0.786	622	618.5	619.5
	0.787	617.5	615.5	620
	0.788	621.5	619.5	619.5
	0.789	620	617	620.5
	0.79	621.5	616	622
	0.791	622	619	617.5
	0.792	615.5	617	624
	0.793	621.5	619	621.5
	0.794	622	618.5	621.5
	0.795	621.5	616.5	619.5
	0.796	621	618.5	618
	0.797	622	615	623.5
	0.798	621.5	617.5	619
	0.799	622	621	620.5
	0.8	624.5	617.5	620
	0.801	622	618.5	622
	0.802	620	618	621
	0.803	618.5	614.5	621.5
	0.804	620.5	615.5	620.5
	0.805	618.5	617.5	619.5
	0.806	620.5	619.5	617.5
	0.807	622	618	623.5
	0.808	620.5	617	619
	0.809	622	617	621
	0.81	622	614.5	621
	0.811	619	618	620.5
	0.812	624.5	617	621
	0.813	623	616	620.5
	0.814	621	614.5	622
	0.815	622	621.5	622
	0.816	622	618.5	624
	0.817	623.5	619	620.5
	0.818	624.5	616.5	621.5
	0.819	620	616	620.5
	0.82	622	619.5	620
	0.821	621	615.5	622
	0.822	622	618.5	621
	0.823	623	622	622
	0.824	619.5	614.5	618.5
	0.825	622	618.5	617.5
	0.826	622	616	621.5
	0.827	622	615.5	621.5
	0.828	622	617.5	618.5
	0.829	622	620	622
	0.83	622	620	622
	0.831	622	615.5	622
	0.832	622	614	622
	0.833	625	615	618
	0.834	621.5	619.5	621
	0.835	628	616.5	621.5
	0.836	622	619	620
	0.837	624.5	617.5	618.5
	0.838	624	616	618.5
	0.839	624	619	622
	0.84	624	615.5	619.5
	0.841	622	618	624
	0.842	622	617.5	622
	0.843	624	617	618
	0.844	622	616.5	619
	0.845	624	615	618
	0.846	623.5	618.5	620
	0.847	622	614.5	617.5
	0.848	624	618	620.5
	0.849	622	618	620.5
	0.85	626.5	617.5	618.5
	0.851	623.5	621.5	622
	0.852	623.5	616.5	622
	0.853	624.5	620.5	618
	0.854	624	616	617.5
	0.855	625.5	617.5	620.5
	0.856	623.5	617	620
	0.857	627.5	616.5	622
	0.858	625.5	615.5	619
	0.859	627.5	618.5	620
	0.86	622	619	618.5
	0.861	622	619.5	617
	0.862	623.5	615.5	621.5
	0.863	627	617.5	620.5
	0.864	622	618.5	620.5
	0.865	624.5	621.5	622
	0.866	624	617.5	617
	0.867	622	616.5	620
	0.868	622	616	621.5
	0.869	625.5	618.5	618.5
	0.87	622	616.5	616.5
	0.871	622	616.5	619
	0.872	624	618	619.5
	0.873	623.5	620	617
	0.874	621	618.5	620
	0.875	623.5	620	618
	0.876	623	620.5	614.5
	0.877	622	619.5	618.5
	0.878	622	617	617.5
	0.879	625	619	616.5
	0.88	622	617.5	617.5
	0.881	622	617.5	617.5
	0.882	623.5	619.5	618
	0.883	627	621.5	618
	0.884	628	620	618.5
	0.885	622	618.5	619
	0.886	622	619.5	618.5
	0.887	625	618	620.5
	0.888	621.5	620	617
	0.889	622	619	617
	0.89	622	620	617.5
	0.891	624.5	617.5	616
	0.892	623.5	622	615.5
	0.893	622	620.5	616
	0.894	622	619	615.5
	0.895	622	618.5	615
	0.896	622	622	618
	0.897	624	618.5	616.5
	0.898	622	621	617.5
	0.899	623.5	617.5	618.5
	0.9	627	620.5	618
	0.901	624.5	619.5	617
	0.902	625	622	617
	0.903	622	620	616.5
	0.904	622	620	618
	0.905	621	615.5	617.5
	0.906	620.5	620	619
	0.907	622	621.5	616.5
	0.908	618	622	616.5
	0.909	621	622	615.5
	0.91	618	622	614.5
	0.911	621	620.5	614.5
	0.912	621	620	616
	0.913	621.5	623.5	615.5
	0.914	622	618.5	613
	0.915	622	622	616.5
	0.916	619.5	620	615
	0.917	622	620.5	616.5
	0.918	621.5	622	617
	0.919	625	625	616.5
	0.92	621.5	620.5	613
	0.921	621.5	622	615
	0.922	622	623.5	614.5
	0.923	620	622	615
	0.924	617	622	615.5
	0.925	618.5	622	614.5
	0.926	618.5	621.5	614
	0.927	616.5	622	614.5
	0.928	619	619.5	611
	0.929	619	620.5	612
	0.93	621	625.5	611
	0.931	618.5	622	615.5
	0.932	622	619.5	611.5
	0.933	618.5	622	619
	0.934	615.5	623.5	615
	0.935	618.5	622	611.5
	0.936	622	621.5	610.5
	0.937	618.5	622	612
	0.938	620	624	611.5
	0.939	621	623.5	611
	0.94	617.5	619	610
	0.941	618.5	623.5	615
	0.942	615.5	622	611.5
	0.943	617	620.5	615
	0.944	618.5	622	611
	0.945	617	622	614
	0.946	616	622	613.5
	0.947	616.5	620.5	612
	0.948	617.5	620	611.5
	0.949	617.5	620.5	612.5
	0.95	615.5	622	611.5
	0.951	616	621	611
	0.952	618.5	622	608.5
	0.953	618.5	621	610.5
	0.954	616.5	621.5	610
	0.955	616.5	620	608.5
	0.956	615.5	621	611.5
	0.957	617	625	610
	0.958	615.5	622	613
	0.959	616.5	624	613
	0.96	617.5	620.5	612
	0.961	619.5	618	610
	0.962	619.5	620	609.5
	0.963	618.5	621	610
	0.964	620.5	619.5	614.5
	0.965	617	620	612
	0.966	617	620	613.5
	0.967	620	619	615
	0.968	615	617.5	611.5
	0.969	616.5	619.5	614
	0.97	620.5	621.5	613.5
	0.971	621	621	612
	0.972	618.5	617	612
	0.973	618	622	609.5
	0.974	624	620	614
	0.975	618.5	620	611.5
	0.976	618.5	617	616
	0.977	616	617	615
	0.978	619	616.5	615
	0.979	619.5	619	617
	0.98	616	619.5	615
	0.981	617.5	615.5	609
	0.982	615.5	620	614
	0.983	618	615.5	614.5
	0.984	622	617.5	613
	0.985	616	617.5	611.5
	0.986	619.5	618.5	615
	0.987	620.5	616.5	616.5
	0.988	620	617.5	613.5
	0.989	620.5	616	615
	0.99	619.5	615.5	615
	0.991	618	618	613
	0.992	616.5	617.5	613
	0.993	622	619.5	617
	0.994	620.5	617.5	616
	0.995	621	615.5	616.5
	0.996	620.5	617.5	622
	0.997	621	615	616
	0.998	622	618	617
	0.999	622	614	615
	1	621.5	618	621.5
	1.001	624.5	616	616.5
	1.002	624.5	616.5	614
	1.003	620.5	615.5	619
	1.004	621	612.5	616.5
	1.005	621	616.5	618.5
	1.006	622	616	618.5
	1.007	621.5	615.5	616
	1.008	620	615	620.5
	1.009	620.5	613.5	617
	1.01	620.5	614	618.5
	1.011	624	612.5	619
	1.012	624	614	617.5
	1.013	622	616	622
	1.014	622	611.5	618.5
	1.015	620.5	609.5	616.5
	1.016	624	613	621
	1.017	622	615	617
	1.018	627	615	621
	1.019	625.5	615.5	617
	1.02	625.5	613.5	620.5
	1.021	623	614	620
	1.022	625.5	611.5	619.5
	1.023	626	612	622
	1.024	625	612.5	620.5
	1.025	624.5	613	618.5
	1.026	623.5	612.5	620
	1.027	623.5	612	619
	1.028	620	612	617.5
	1.029	623.5	614	621
	1.03	622	613	617.5
	1.031	622	611	617.5
	1.032	622	615.5	622
	1.033	622	611.5	621.5
	1.034	624.5	611.5	620.5
	1.035	623.5	615	617.5
	1.036	624	615	618
	1.037	621.5	614.5	616.5
	1.038	622	617	615.5
	1.039	621.5	611	617.5
	1.04	622	613	618
	1.041	627	615	622
	1.042	622	614	617
	1.043	622	613	619
	1.044	623.5	614.5	617.5
	1.045	625.5	609.5	615.5
	1.046	624	611.5	617
	1.047	625.5	612.5	616.5
	1.048	623.5	612.5	619.5
	1.049	624	610.5	619
	1.05	625.5	616	616
	1.051	626	614	622
	1.052	621.5	615.5	620.5
	1.053	619.5	612	618
	1.054	620.5	615	619.5
	1.055	624.5	616.5	617
	1.056	621.5	615	617.5
	1.057	622	614.5	616.5
	1.058	622	615.5	619.5
	1.059	620.5	615.5	619.5
	1.06	622	613.5	616.5
	1.061	624	615	618
	1.062	622	616	618
	1.063	624	615	619
	1.064	622	615.5	615.5
	1.065	622	613.5	614.5
	1.066	624	612	615
	1.067	620.5	615.5	616
	1.068	622	616.5	620
	1.069	620.5	618	617
	1.07	622	615.5	617
	1.071	622	617	617
	1.072	619	615	615.5
	1.073	620	618	618.5
	1.074	620.5	616.5	618.5
	1.075	622	618	619.5
	1.076	621	614	616.5
	1.077	621.5	617.5	615.5
	1.078	622	616.5	617.5
	1.079	620	617	616.5
	1.08	624	620	618.5
	1.081	618	616.5	617
	1.082	621.5	615.5	618.5
	1.083	621.5	616.5	613.5
	1.084	618.5	615.5	615
	1.085	622	618	618.5
	1.086	621	618	616
	1.087	622	621	615.5
	1.088	622	618	617
	1.089	621.5	619.5	618.5
	1.09	621.5	620.5	617.5
	1.091	621.5	618	614.5
	1.092	619.5	620.5	618
	1.093	620	616.5	617
	1.094	621	620	615.5
	1.095	621.5	623.5	619
	1.096	619.5	620.5	618
	1.097	622	617	618.5
	1.098	619	619	617.5
	1.099	622	619.5	614.5
	1.1	617.5	616	617.5
	1.101	621	620.5	616.5
	1.102	621.5	617.5	616
	1.103	622	620.5	617.5
	1.104	621	619.5	617
	1.105	621.5	619.5	616.5
	1.106	622	617.5	616.5
	1.107	623	618.5	615
	1.108	624.5	620	617
	1.109	619	622	618
	1.11	622	617.5	615.5
	1.111	619.5	618	617
	1.112	622	618	614
	1.113	621.5	618	621.5
	1.114	622	620	615
	1.115	622	619	617.5
	1.116	622	621	616.5
	1.117	621.5	619	614.5
	1.118	621	620.5	618.5
	1.119	619.5	620.5	619.5
	1.12	620.5	619	617
	1.121	622	619	616.5
	1.122	621	621.5	616.5
	1.123	620	620	615.5
	1.124	622	617	623.5
	1.125	622	618.5	618.5
	1.126	623	621	619.5
	1.127	621	620	619
	1.128	626	622	618.5
	1.129	619.5	621.5	619.5
	1.13	620.5	622	620.5
	1.131	624	619	620
	1.132	618.5	620.5	617.5
	1.133	622	619	616.5
	1.134	622	619	618
	1.135	622	615	615.5
	1.136	623.5	622	621
	1.137	622	619	622
	1.138	624.5	622	618.5
	1.139	622	616.5	616.5
	1.14	622	620.5	622
	1.141	626	617.5	617.5
	1.142	622	620.5	619.5
	1.143	622	619.5	619
	1.144	622	619.5	618
	1.145	624.5	622	621
	1.146	625.5	621.5	622
	1.147	620.5	618	617.5
	1.148	625	616.5	618.5
	1.149	622	622.5	621
	1.15	624.5	620.5	620
	1.151	626	624	622
	1.152	624	618.5	624.5
	1.153	621.5	620.5	622
	1.154	623.5	622	621.5
	1.155	621	617.5	621.5
	1.156	623.5	622	620
	1.157	625	622	624
	1.158	620	621	625
	1.159	622	621.5	620
	1.16	622	620.5	623.5
	1.161	622	620.5	619
	1.162	620.5	621	622
	1.163	625.5	623	621
	1.164	623.5	620	619.5
	1.165	620	622	622
	1.166	622	619.5	620.5
	1.167	621.5	619.5	620
	1.168	622	622	622
	1.169	622	622	622
	1.17	623.5	624	620
	1.171	620.5	622	622
	1.172	621	624	618.5
	1.173	622	624	618
	1.174	624	625	619.5
	1.175	624	625	622
	1.176	622	624.5	617.5
	1.177	621	622	618.5
	1.178	622	626	622
	1.179	621	627	622
	1.18	620	622	622
	1.181	618.5	624.5	616.5
	1.182	620	624	620
	1.183	620.5	622	620.5
	1.184	620	623	620.5
	1.185	623.5	626	618.5
	1.186	620	623	620
	1.187	622	624	621
	1.188	621.5	627	618.5
	1.189	622	624	618
	1.19	621	624.5	616
	1.191	618	626.5	619.5
	1.192	621	624.5	620
	1.193	618.5	624	617
	1.194	621.5	628.5	616
	1.195	617.5	628	618
	1.196	620	624.5	619.5
	1.197	620.5	623	618.5
	1.198	621.5	622	619
	1.199	624.5	623.5	618.5
	1.2	619.5	626	618
	1.201	622	629	616.5
	1.202	620	626	619.5
	1.203	619.5	631	619
	1.204	620	624	618.5
	1.205	620.5	626	618
	1.206	621	628	618.5
	1.207	620.5	627.5	616.5
	1.208	621	626	619.5
	1.209	622	628	615.5
	1.21	619	627	620.5
	1.211	622	624	619.5
	1.212	622	626	616
	1.213	619.5	626	617.5
	1.214	622	626	620.5
	1.215	622	625.5	618.5
	1.216	618.5	624	617.5
	1.217	621	628.5	617.5
	1.218	619.5	625	619.5
	1.219	620.5	625.5	620
	1.22	620.5	624.5	618.5
	1.221	621.5	626	618.5
	1.222	621.5	622	616.5
	1.223	620.5	624	619
	1.224	621.5	623.5	616
	1.225	621.5	622	617
	1.226	621.5	622	620
	1.227	620	622	621
	1.228	621	622	621.5
	1.229	622	625	618.5
	1.23	622	625	618.5
	1.231	618	622	616
	1.232	620	625	617.5
	1.233	622	625	618.5
	1.234	620	622	619.5
	1.235	622	622	618
	1.236	617.5	625	615.5
	1.237	623.5	622	616
	1.238	621	623.5	619
	1.239	619	624	619.5
	1.24	621.5	622	620.5
	1.241	621	624	618
	1.242	620.5	622	619.5
	1.243	622	625.5	618
	1.244	621	618.5	620.5
	1.245	619	620.5	618
	1.246	621	624	617
	1.247	620.5	621	616
	1.248	620.5	618.5	617.5
	1.249	621	624	621
	1.25	618.5	622	620
	1.251	619.5	619.5	615.5
	1.252	626.5	622	617
	1.253	624	622	618.5
	1.254	621.5	622	617.5
	1.255	620.5	618	616
	1.256	622	617	617.5
	1.257	623	623.5	619.5
	1.258	622	618.5	618
	1.259	622	622	619
	1.26	620.5	624	620.5
	1.261	622	622	616.5
	1.262	620.5	619	617.5
	1.263	623.5	622	620
	1.264	621.5	621.5	617.5
	1.265	619.5	620.5	617.5
	1.266	622	624	615.5
	1.267	622	621.5	618.5
	1.268	620	625	619.5
	1.269	626.5	623.5	616.5
	1.27	620	624	618.5
	1.271	620.5	624	618.5
	1.272	622	622	620.5
	1.273	622	624.5	617
	1.274	620	622	617
	1.275	622	626.5	617.5
	1.276	623	624	615
	1.277	624	626	617.5
	1.278	618	628.5	617
	1.279	624	626.5	618
	1.28	622	625	618
	1.281	622	626.5	617.5
	1.282	621.5	629.5	615
	1.283	622	627.5	618.5
	1.284	620	624	617
	1.285	622	626	618
	1.286	624	625	615.5
	1.287	622	630	618
	1.288	622	624.5	618
	1.289	621	624.5	616
	1.29	622	627.5	614.5
	1.291	621.5	626.5	615.5
	1.292	622	629	615.5
	1.293	620.5	628	614.5
	1.294	618	630	616
	1.295	619	629.5	617.5
	1.296	621.5	628	616.5
	1.297	622	627.5	613.5
	1.298	625.5	625.5	614
	1.299	619	627.5	617.5
	1.3	620.5	627	618
	1.301	621	625	614
	1.302	619.5	626	614.5
	1.303	622	625	618
	1.304	622	626	618
	1.305	620	627	615
	1.306	619.5	628.5	614
	1.307	622	623.5	618
	1.308	618.5	621.5	616.5
	1.309	619.5	623.5	613.5
	1.31	620.5	624.5	614
	1.311	623.5	625	616.5
	1.312	622	621.5	617
	1.313	621	624.5	615.5
	1.314	618.5	618.5	620.5
	1.315	620	622	618
	1.316	619.5	622	614
	1.317	619.5	622	615.5
	1.318	620	621.5	617.5
	1.319	619	620	618.5
	1.32	620	619	615
	1.321	619.5	616.5	618
	1.322	618	617	616
	1.323	620.5	617	616.5
	1.324	619.5	617	618
	1.325	620.5	615.5	615
	1.326	620.5	615	616.5
	1.327	618.5	615.5	616.5
	1.328	619.5	614	618
	1.329	621.5	613.5	616
	1.33	617	614	619
	1.331	621.5	610.5	620
	1.332	620	610	617
	1.333	620.5	609	617.5
	1.334	619.5	607	616
	1.335	620	607.5	619.5
	1.336	622	608.5	617.5
	1.337	618.5	605.5	620.5
	1.338	622	604.5	620.5
	1.339	618.5	601.5	616.5
	1.34	620.5	601.5	620.5
	1.341	621	597.5	615.5
	1.342	621	603	617
	1.343	620.5	596.5	621.5
	1.344	618.5	597.5	624.5
	1.345	621.5	592.5	622
	1.346	618.5	592.5	622
	1.347	621.5	589.5	626
	1.348	622	592	621
	1.349	622	588	622
	1.35	620.5	590.5	623
	1.351	622	587.5	621
	1.352	618.5	586.5	621.5
	1.353	620.5	583	621.5
	1.354	622	583	622
	1.355	619	578	624
	1.356	617.5	579	625
	1.357	619.5	577	625
	1.358	618.5	574	624.5
	1.359	623	572.5	625
	1.36	622	574	622
	1.361	624.5	569	625.5
	1.362	624	572	625
	1.363	620.5	566	626
	1.364	621	562.5	626
	1.365	622	562.5	627
	1.366	620	562.5	622
	1.367	622	558	624.5
	1.368	619.5	556	624.5
	1.369	620.5	555	628
	1.37	619.5	554	621.5
	1.371	622	553.5	628.5
	1.372	622	552	629
	1.373	622	547.5	626
	1.374	622	541.5	624
	1.375	620	547	626
	1.376	620	545	621.5
	1.377	620	540	625.5
	1.378	621.5	538	626.5
	1.379	620	539	629.5
	1.38	622	536.5	625.5
	1.381	625	538	626
	1.382	620.5	528.5	628.5
	1.383	619.5	531.5	628
	1.384	622	532.5	625.5
	1.385	624.5	531.5	623.5
	1.386	622	527.5	628.5
	1.387	622	527	624.5
	1.388	622	525.5	625.5
	1.389	622	526	622
	1.39	627	520.5	625
	1.391	620	519.5	622
	1.392	623.5	518	626
	1.393	622	519.5	623.5
	1.394	621	515.5	623.5
	1.395	625	514.5	622
	1.396	622	513	623.5
	1.397	626.5	512	622
	1.398	622	508.5	620.5
	1.399	624.5	509.5	622
	1.4	621	505.5	620.5
	1.401	624	504	619
	1.402	620.5	498	622
	1.403	622	505.5	619.5
	1.404	626	500	620
	1.405	622	494.5	621
	1.406	622	492.5	620.5
	1.407	622	488	622
	1.408	625	484	620.5
	1.409	624	484	617
	1.41	624	480	616
	1.411	622	476	616
	1.412	622	470.5	613
	1.413	622	469.5	616
	1.414	622	462.5	612.5
	1.415	625	457.5	616
	1.416	625.5	452	608.5
	1.417	625.5	455.5	614
	1.418	621.5	448.5	610
	1.419	622	439.5	610
	1.42	621	434.5	608.5
	1.421	622	430	610.5
	1.422	621.5	424	611.5
	1.423	625	413	609
	1.424	624	409	604.5
	1.425	622	402	607
	1.426	620.5	394.5	606.5
	1.427	625	386	607.5
	1.428	622	377.5	607.5
	1.429	626.5	372.5	603.5
	1.43	625.5	364.5	602
	1.431	618.5	355	602.5
	1.432	625.5	351	603
	1.433	625	341.5	601.5
	1.434	622	333.5	602.5
	1.435	622	327	598.5
	1.436	624.5	315	600
	1.437	622	311.5	598
	1.438	623	300.5	598
	1.439	622	295.5	600
	1.44	624.5	290.5	597
	1.441	622	280	597.5
	1.442	625	273	592.5
	1.443	624	267.5	594
	1.444	622	259.5	591
	1.445	625.5	256.5	589
	1.446	622	246	592.5
	1.447	625.5	242.5	589.5
	1.448	624.5	234.5	589.5
	1.449	624.5	234	589.5
	1.45	627	225.5	586.5
	1.451	624	221	587
	1.452	627.5	214.5	583.5
	1.453	626	210	585
	1.454	625	202.5	585
	1.455	626	197.5	583.5
	1.456	628	191	581.5
	1.457	626.5	183.5	581
	1.458	627.5	183.5	579.5
	1.459	627	173.5	577
	1.46	622	170	576
	1.461	625	168	579
	1.462	625.5	163	578
	1.463	627.5	157	574
	1.464	625	153.5	573
	1.465	622	153	571.5
	1.466	622	149	569
	1.467	624.5	145.5	568.5
	1.468	623	144	571
	1.469	624	142	565.5
	1.47	620	138	567.5
	1.471	622	132	567
	1.472	624	130	564.5
	1.473	622	131	566
	1.474	624.5	125	560
	1.475	624	123.5	558.5
	1.476	622	126.5	557.5
	1.477	627.5	121.5	559.5
	1.478	623.5	121.5	554.5
	1.479	622	118.5	554
	1.48	622	118.5	552
	1.481	622	115.5	551.5
	1.482	622	117	549
	1.483	622	112	549
	1.484	622	111	550
	1.485	618.5	111.5	546.5
	1.486	622	115	544
	1.487	622	108.5	544.5
	1.488	622	107	542
	1.489	621.5	105	539.5
	1.49	623.5	103	540.5
	1.491	622	105	539
	1.492	621.5	104.5	537.5
	1.493	622	104	535
	1.494	617.5	102.5	532.5
	1.495	622	103	531.5
	1.496	621	103	532
	1.497	617	100	527
	1.498	619	100	525
	1.499	621	99	527
	1.5	617.5	99.5	526.5
	1.501	619.5	102.5	523
	1.502	618	97.5	521.5
	1.503	619.5	102	515.5
	1.504	621.5	100	515.5
	1.505	622	98.5	516
	1.506	620	101	513
	1.507	618.5	98	512
	1.508	620	99.5	511.5
	1.509	616.5	97	508.5
	1.51	617.5	100.5	504
	1.511	621.5	102	504
	1.512	618.5	100.5	500
	1.513	619	100	497.5
	1.514	616.5	98.5	494.5
	1.515	620	98	492.5
	1.516	619	99.5	491.5
	1.517	620	101.5	488
	1.518	621	102.5	484
	1.519	619	102.5	480.5
	1.52	620	102.5	481.5
	1.521	617.5	102.5	478.5
	1.522	618.5	103.5	472.5
	1.523	617.5	104	471.5
	1.524	616	107	467
	1.525	615.5	101.5	464
	1.526	618	106.5	461
	1.527	619.5	105	458
	1.528	619	109	452
	1.529	619.5	109	447.5
	1.53	618.5	109.5	443.5
	1.531	617.5	112.5	441
	1.532	618	112.5	434.5
	1.533	619.5	114.5	430.5
	1.534	621	116	428.5
	1.535	615.5	116	423
	1.536	617.5	118	419.5
	1.537	616.5	122.5	414.5
	1.538	619.5	123.5	411
	1.539	621.5	121	403.5
	1.54	617	125.5	397.5
	1.541	620	127.5	396.5
	1.542	620.5	131	391.5
	1.543	618	134.5	387.5
	1.544	619	136.5	380.5
	1.545	617	140	376.5
	1.546	620	141.5	373
	1.547	620	143.5	367.5
	1.548	618.5	139.5	363.5
	1.549	620	144	355.5
	1.55	621.5	146	355
	1.551	617.5	148	351
	1.552	619.5	152.5	343
	1.553	616	157	338.5
	1.554	618	159	334
	1.555	616	161	329.5
	1.556	622	162	322.5
	1.557	622	164	319
	1.558	617	168	314
	1.559	618.5	174.5	307.5
	1.56	622	172.5	301.5
	1.561	622	175	297
	1.562	619.5	175.5	294
	1.563	617.5	178.5	288.5
	1.564	620.5	182	282
	1.565	622	180	278
	1.566	618.5	186	273
	1.567	619	186	268
	1.568	618	188	264.5
	1.569	618.5	190	260.5
	1.57	622	191.5	255
	1.571	620	194	251.5
	1.572	620	201	245
	1.573	621	202.5	239
	1.574	621	203	237.5
	1.575	622	200.5	232.5
	1.576	624.5	207.5	226
	1.577	624.5	207	221
	1.578	623.5	214	218.5
	1.579	622	212	215.5
	1.58	622	217	208
	1.581	621	216	204
	1.582	622	219.5	198.5
	1.583	623.5	226.5	195
	1.584	621.5	230.5	190
	1.585	622	236.5	189
	1.586	619.5	240.5	183
	1.587	623.5	240.5	181
	1.588	622	243	176
	1.589	624	251	173
	1.59	625	253.5	172
	1.591	621	258.5	167.5
	1.592	620.5	264	164
	1.593	624	269.5	160
	1.594	617.5	273	157
	1.595	625	275.5	154.5
	1.596	623	282	149.5
	1.597	622	287	150.5
	1.598	623	290.5	147.5
	1.599	627	298.5	145
	1.6	623.5	305.5	143.5
	1.601	627.5	307	139.5
	1.602	623	316.5	137.5
	1.603	626	315	130
	1.604	624.5	322	132.5
	1.605	625	327	128
	1.606	625	329	129.5
	1.607	623.5	339.5	125
	1.608	625.5	340	125
	1.609	627	344	123.5
	1.61	629	349.5	118.5
	1.611	626.5	354.5	116.5
	1.612	627.5	356.5	117
	1.613	627.5	362	118
	1.614	630.5	365	111
	1.615	626	366.5	118
	1.616	627	369	110.5
	1.617	627.5	375	111.5
	1.618	632.5	379.5	109.5
	1.619	630	383	109
	1.62	629.5	386.5	109
	1.621	627.5	390.5	108.5
	1.622	626	395	109
	1.623	628	397.5	106.5
	1.624	627.5	403.5	104
	1.625	629.5	410	106
	1.626	634	413.5	104
	1.627	633.5	416	101
	1.628	631.5	422.5	100
	1.629	627	431.5	101.5
	1.63	628.5	437	98.5
	1.631	630.5	442.5	102.5
	1.632	631	448	102.5
	1.633	631	461	97.5
	1.634	631	468	102.5
	1.635	633.5	475	101
	1.636	632.5	484	100
	1.637	629	494	100.5
	1.638	632	501	98
	1.639	632.5	515	99
	1.64	633.5	524.5	97.5
	1.641	635	535.5	97
	1.642	633	547	102.5
	1.643	632.5	557	100.5
	1.644	634	567.5	100
	1.645	636	595	100.5
	1.646	636	592.5	100.5
	1.647	635	615.5	98.5
	1.648	635.5	624.5	99
	1.649	634.5	636	103.5
	1.65	635	640	101.5
	1.651	636	658	101.5
	1.652	631.5	666.5	103
	1.653	634.5	677	98.5
	1.654	634	682	102.5
	1.655	633	699.5	106
	1.656	633.5	709.5	105.5
	1.657	636	723	104.5
	1.658	634.5	740.5	108
	1.659	634	754	108
	1.66	633.5	766.5	110
	1.661	631	779	106.5
	1.662	632.5	788	108
	1.663	633	795	109.5
	1.664	636	809.5	110
	1.665	630.5	813	112
	1.666	635	823.5	112.5
	1.667	635.5	830	114
	1.668	633	834.5	116
	1.669	634	841.5	115
	1.67	630.5	847.5	116.5
	1.671	630	851.5	117.5
	1.672	636	859	123
	1.673	636	864	119.5
	1.674	635	866.5	123
	1.675	634	872	124.5
	1.676	633	875.5	127.5
	1.677	633.5	875.5	131
	1.678	632.5	883	129.5
	1.679	631	884	136.5
	1.68	630.5	886.5	140
	1.681	632.5	889.5	142.5
	1.682	629	888.5	146
	1.683	633	895.5	150
	1.684	632	896	157
	1.685	630.5	899	160
	1.686	633	897	160
	1.687	637	903	167
	1.688	631.5	904.5	175
	1.689	631.5	911	178
	1.69	632.5	915	182
	1.691	635.5	914.5	184.5
	1.692	630	919	188.5
	1.693	633.5	918.5	188.5
	1.694	632.5	925.5	195.5
	1.695	636	927.5	201
	1.696	633.5	929	201.5
	1.697	635	935.5	208.5
	1.698	632.5	940.5	213.5
	1.699	633.5	940.5	218
	1.7	632	943	218.5
	1.701	634.5	946	223
	1.702	635	947.5	224
	1.703	631.5	950.5	228
	1.704	635.5	958.5	233
	1.705	631.5	960.5	232.5
	1.706	631.5	964.5	238
	1.707	635	969	242
	1.708	631	971.5	241
	1.709	634	973.5	241.5
	1.71	634.5	980	246
	1.711	629.5	985.5	253
	1.712	629.5	987	251.5
	1.713	632.5	993	252
	1.714	632.5	998.5	259
	1.715	632	995	262.5
	1.716	630	1004.5	265.5
	1.717	627.5	1006.5	266
	1.718	631.5	1012	272
	1.719	634	1016	272
	1.72	633	1017	273.5
	1.721	629	1018.5	273.5
	1.722	627	1021.5	275.5
	1.723	630	1028	282.5
	1.724	630	1028	284.5
	1.725	627	1032.5	285.5
	1.726	627	1036	290
	1.727	625.5	1039.5	292
	1.728	624.5	1038.5	294
	1.729	624.5	1044	301
	1.73	623.5	1043.5	307.5
	1.731	628.5	1050.5	309
	1.732	625	1049	314.5
	1.733	621	1052	317.5
	1.734	622	1054.5	318
	1.735	620	1060.5	327.5
	1.736	621	1064	339.5
	1.737	617	1066	339
	1.738	615.5	1069.5	353
	1.739	614	1066.5	361
	1.74	614.5	1077.5	364
	1.741	610	1079.5	369
	1.742	610.5	1078.5	376
	1.743	611	1082	380.5
	1.744	607.5	1087.5	389
	1.745	606.5	1089	392
	1.746	605.5	1094	403.5
	1.747	606.5	1099.5	407.5
	1.748	601	1099.5	414
	1.749	599.5	1097	423.5
	1.75	597.5	1103.5	432
	1.751	595	1104	441
	1.752	592.5	1108	449
	1.753	588	1111.5	462
	1.754	590.5	1114.5	471
	1.755	581.5	1114.5	478
	1.756	584.5	1118.5	486
	1.757	584	1120.5	496
	1.758	579	1121	501
	1.759	579	1124.5	514.5
	1.76	570.5	1123.5	525
	1.761	574.5	1126	536.5
	1.762	570	1129	542
	1.763	567	1129	556.5
	1.764	564.5	1135.5	566.5
	1.765	561.5	1136.5	575.5
	1.766	556	1137.5	591
	1.767	553.5	1140.5	603
	1.768	552.5	1140	611
	1.769	548.5	1142.5	625.5
	1.77	546	1144	633.5
	1.771	543.5	1144	643
	1.772	538	1147	649.5
	1.773	536	1150	661
	1.774	534.5	1153	670
	1.775	531.5	1153.5	677
	1.776	533	1159	687
	1.777	527.5	1159	694
	1.778	520.5	1159	703.5
	1.779	520	1168	714.5
	1.78	522	1163	721
	1.781	518	1174	725
	1.782	517.5	1173.5	734
	1.783	510	1171.5	741.5
	1.784	512	1178.5	747
	1.785	509.5	1181.5	754
	1.786	506	1183	761
	1.787	503	1184	766.5
	1.788	502	1185	775
	1.789	502	1189	783.5
	1.79	498.5	1189	785.5
	1.791	496.5	1197	792.5
	1.792	494	1197	799.5
	1.793	493.5	1199	806
	1.794	496.5	1200	812.5
	1.795	492	1203.5	818.5
	1.796	488	1203.5	820.5
	1.797	492	1212.5	830.5
	1.798	488	1212	833
	1.799	489	1212	841
	1.8	485.5	1216	845.5
	1.801	485	1218.5	854.5
	1.802	485.5	1218.5	859
	1.803	482.5	1227	862.5
	1.804	483	1228	873
	1.805	483.5	1231.5	877
	1.806	478.5	1233.5	885
	1.807	484	1238.5	888.5
	1.808	482.5	1240.5	895.5
	1.809	481	1240	901
	1.81	475.5	1247.5	908
	1.811	477.5	1251	914
	1.812	478.5	1255	915
	1.813	476.5	1254	926
	1.814	476.5	1261	932.5
	1.815	472.5	1259	937
	1.816	473	1266	943.5
	1.817	470	1268.5	948
	1.818	471.5	1271	956
	1.819	467.5	1272.5	959
	1.82	465	1277	964
	1.821	463	1278.5	971.5
	1.822	461	1283.5	975
	1.823	457.5	1286.5	980
	1.824	456.5	1288	985.5
	1.825	448.5	1291	988.5
	1.826	449	1293	992
	1.827	442.5	1297.5	998.5
	1.828	440.5	1302.5	999.5
	1.829	436.5	1306	1007
	1.83	432.5	1308	1011.5
	1.831	430.5	1312	1013.5
	1.832	424.5	1317	1020.5
	1.833	422	1317.5	1018.5
	1.834	411.5	1318.5	1023.5
	1.835	406	1320.5	1027
	1.836	404.5	1323	1032
	1.837	396.5	1331.5	1037.5
	1.838	391	1334	1039.5
	1.839	386.5	1337.5	1039.5
	1.84	379.5	1338	1046
	1.841	376	1337	1047.5
	1.842	360.5	1345.5	1051.5
	1.843	355.5	1346.5	1053
	1.844	349.5	1349.5	1060
	1.845	339	1350.5	1058.5
	1.846	335	1352	1066.5
	1.847	325.5	1352	1067
	1.848	317	1356.5	1069.5
	1.849	309	1357.5	1074
	1.85	298	1362.5	1079.5
	1.851	293.5	1364	1078
	1.852	281	1362	1088.5
	1.853	273.5	1364.5	1090
	1.854	270	1363	1093
	1.855	263.5	1364	1096.5
	1.856	253	1364	1103.5
	1.857	246	1364.5	1108.5
	1.858	239.5	1362.5	1112
	1.859	231	1363.5	1114
	1.86	225.5	1363	1118
	1.861	218	1361	1124.5
	1.862	208.5	1358.5	1128.5
	1.863	206.5	1361.5	1136.5
	1.864	197.5	1360	1135.5
	1.865	193.5	1357.5	1139.5
	1.866	190.5	1358	1143.5
	1.867	183	1358	1144
	1.868	179	1356	1149
	1.869	173.5	1353	1153.5
	1.87	169	1353	1158.5
	1.871	165.5	1351	1159
	1.872	162	1352.5	1163
	1.873	159	1349.5	1169
	1.874	157	1348.5	1176.5
	1.875	154	1352	1174
	1.876	150.5	1345.5	1186
	1.877	147	1343.5	1188.5
	1.878	143.5	1338	1189
	1.879	141	1338	1196.5
	1.88	137	1338	1201
	1.881	133.5	1338	1207.5
	1.882	136.5	1338	1215
	1.883	129.5	1336	1218.5
	1.884	129.5	1338	1226.5
	1.885	126.5	1335.5	1233
	1.886	126	1336.5	1238.5
	1.887	123	1333	1244.5
	1.888	122	1330.5	1247.5
	1.889	122	1332	1255
	1.89	120	1332.5	1257.5
	1.891	116	1331.5	1259.5
	1.892	117.5	1328.5	1270
	1.893	118.5	1329.5	1273.5
	1.894	115.5	1329	1278.5
	1.895	114.5	1333	1283
	1.896	111	1329	1286
	1.897	113	1330.5	1289.5
	1.898	110.5	1329	1296.5
	1.899	110.5	1329	1296
	1.9	108	1329.5	1302
	1.901	108.5	1332.5	1306.5
	1.902	106.5	1331	1308
	1.903	105	1328.5	1312
	1.904	108	1327	1319.5
	1.905	106.5	1330.5	1323
	1.906	107.5	1331	1329
	1.907	104	1331.5	1335
	1.908	106	1331.5	1337
	1.909	103.5	1331	1338
	1.91	106.5	1334	1345.5
	1.911	104.5	1329	1349.5
	1.912	101	1331.5	1355.5
	1.913	106.5	1337	1357.5
	1.914	109	1332	1360
	1.915	108	1330.5	1362.5
	1.916	108	1333	1367.5
	1.917	109.5	1333.5	1373
	1.918	108.5	1333.5	1377
	1.919	107.5	1332.5	1382.5
	1.92	112	1333.5	1385.5
	1.921	112	1330.5	1390.5
	1.922	109.5	1333.5	1395
	1.923	117	1333.5	1397.5
	1.924	122	1331.5	1405
	1.925	120.5	1335	1409
	1.926	120.5	1332	1412.5
	1.927	122.5	1335	1419
	1.928	124.5	1337	1420
	1.929	125	1338	1427
	1.93	130.5	1337.5	1433
	1.931	130	1338	1436.5
	1.932	135	1338	1440
	1.933	135.5	1338	1442.5
	1.934	138.5	1343.5	1448.5
	1.935	142.5	1338	1452
	1.936	140	1338	1452.5
	1.937	143	1346.5	1456.5
	1.938	146	1338	1457
	1.939	147	1345	1464.5
	1.94	152	1347	1467
	1.941	152.5	1347.5	1469
	1.942	155.5	1346.5	1470.5
	1.943	154.5	1347.5	1475.5
	1.944	161	1353	1479.5
	1.945	163	1349.5	1480
	1.946	162	1353	1483.5
	1.947	164	1353	1482.5
	1.948	166.5	1353	1487
	1.949	166.5	1353	1487
	1.95	167.5	1356.5	1490.5
	1.951	169	1356.5	1492
	1.952	171	1358	1495.5
	1.953	173.5	1356.5	1496.5
	1.954	173	1362.5	1498
	1.955	175	1361.5	1494
	1.956	178	1362.5	1498.5
	1.957	173.5	1366	1499.5
	1.958	177	1366	1500.5
	1.959	175	1368	1502
	1.96	179	1368	1502
	1.961	177.5	1373.5	1500
	1.962	177.5	1370.5	1502
	1.963	179	1378.5	1502
	1.964	181.5	1381	1502
	1.965	181.5	1381.5	1502
	1.966	182.5	1386	1500
	1.967	180.5	1386.5	1499.5
	1.968	184	1387	1502
	1.969	178	1390	1505.5
	1.97	183.5	1393	1498.5
	1.971	183	1395	1501
	1.972	185	1397.5	1502
	1.973	184.5	1397.5	1499.5
	1.974	185	1406	1498
	1.975	185	1409	1498.5
	1.976	184.5	1412.5	1499
	1.977	184.5	1415.5	1500.5
	1.978	185.5	1419	1498
	1.979	188	1419	1497
	1.98	189.5	1423.5	1495.5
	1.981	185	1427.5	1498
	1.982	185.5	1427.5	1494.5
	1.983	188	1438.5	1494
	1.984	190.5	1438	1493.5
	1.985	189	1440.5	1494.5
	1.986	191.5	1442.5	1492
	1.987	191	1449	1492.5
	1.988	190	1448.5	1490.5
	1.989	192.5	1450	1484
	1.99	196.5	1455.5	1486.5
	1.991	197.5	1457	1484
	1.992	198.5	1457	1483.5
	1.993	203	1466.5	1484
[truncated: 6,006 more rows]

## Sheet: I
DataTypeVer2.0	Time	Fz	Fz	Fz
NumberOfData		8000	8000	8000
PreTriggerData		0	0	0
SamplingTime[ms]		1	1	1
DataLabel		C1:CMJ	C2:CMJ	C3:CMJ
DataUnit	sec	N	N	N
	0	618	619.5	637.5
	0.001	622	618.5	639
	0.002	622	619	643
	0.003	620.5	620.5	639.5
	0.004	621	618	645
	0.005	621.5	618.5	643
	0.006	622	621	643.5
	0.007	622	623	647.5
	0.008	621.5	620	645
	0.009	621.5	619	643
	0.01	623.5	620.5	642.5
	0.011	624.5	621.5	643
	0.012	621.5	623	638.5
	0.013	623.5	623	643
	0.014	621.5	621.5	643
	0.015	623.5	620	646
	0.016	621.5	621.5	640
	0.017	621	621	640
	0.018	624	621.5	638.5
	0.019	620	621.5	641.5
	0.02	625.5	623.5	642
	0.021	622.5	621.5	639
	0.022	626	623.5	640.5
	0.023	624	625	641
	0.024	624.5	624	639.5
	0.025	623	624.5	642
	0.026	621.5	625.5	636
	0.027	621.5	623.5	636
	0.028	622.5	626	636
	0.029	623	627	640
	0.03	624	621	635
	0.031	623	624.5	634.5
	0.032	622.5	624.5	639
	0.033	623.5	627.5	636
	0.034	620	625	633
	0.035	624.5	624	633
	0.036	621.5	627.5	635
	0.037	623	626.5	632.5
	0.038	624	624.5	634
	0.039	623	627.5	635.5
	0.04	621.5	627	633
	0.041	624.5	625	633.5
	0.042	623	628	633
	0.043	621.5	626.5	630.5
	0.044	622.5	628	632.5
	0.045	623	624	634.5
	0.046	621	625	634.5
	0.047	621.5	629.5	631
	0.048	622	631.5	630.5
	0.049	620.5	627.5	632
	0.05	623.5	626.5	631
	0.051	626	626.5	628.5
	0.052	624.5	623.5	631.5
	0.053	621.5	625	629.5
	0.054	621	627	629
	0.055	622	624	632.5
	0.056	622.5	627.5	633
	0.057	621.5	627.5	634.5
	0.058	623	623.5	634
	0.059	621.5	626.5	629.5
	0.06	620	625	634
	0.061	624	627.5	629.5
	0.062	621	624.5	630
	0.063	623	625	632
	0.064	622	625.5	629.5
	0.065	620.5	625.5	631
	0.066	621	623	631.5
	0.067	621	621	629
	0.068	621.5	623	629.5
	0.069	619	627	629
	0.07	619.5	625	634
	0.071	620.5	622.5	631
	0.072	621	621.5	636
	0.073	620.5	623	634
	0.074	619.5	622.5	635
	0.075	620	625.5	633.5
	0.076	620.5	623.5	632
	0.077	618.5	621.5	629.5
	0.078	623	621.5	634.5
	0.079	622	621.5	636
	0.08	620.5	621.5	636
	0.081	622	621.5	636
	0.082	620.5	622	635
	0.083	620.5	621	636
	0.084	620.5	622	634.5
	0.085	621.5	620.5	636
	0.086	620	621.5	635.5
	0.087	618	621.5	635.5
	0.088	621.5	622	637
	0.089	622.5	622.5	634
	0.09	621	623	632.5
	0.091	620.5	621.5	637
	0.092	617	619	633.5
	0.093	620	618.5	635
	0.094	618.5	616.5	633
	0.095	621	618	633
	0.096	620.5	621	635
	0.097	619.5	620.5	634
	0.098	620	620.5	632
	0.099	623	618.5	631
	0.1	621	621.5	629
	0.101	620	616.5	634.5
	0.102	623	618	631.5
	0.103	619	618	632.5
	0.104	622.5	617.5	627
	0.105	621.5	613.5	630
	0.106	622.5	620.5	628
	0.107	621	618	630
	0.108	620.5	616.5	625
	0.109	621	619.5	626
	0.11	620	619.5	625.5
	0.111	622.5	619.5	625
	0.112	624	616.5	624.5
	0.113	620	617	623
	0.114	621.5	618	624
	0.115	617.5	618.5	624.5
	0.116	623.5	616.5	625.5
	0.117	620.5	618.5	621.5
	0.118	621	617.5	621.5
	0.119	621.5	617.5	617.5
	0.12	621.5	620	618.5
	0.121	619.5	619.5	617
	0.122	622.5	618	615
	0.123	618	619.5	615
	0.124	621.5	615	615.5
	0.125	625.5	617.5	618.5
	0.126	623	618	617.5
	0.127	622.5	618.5	617
	0.128	622	617	613.5
	0.129	621.5	621.5	614.5
	0.13	627.5	615	613
	0.131	620.5	616.5	613.5
	0.132	621	618.5	613.5
	0.133	623	619	612.5
	0.134	621.5	618	611
	0.135	621.5	617.5	610
	0.136	622	619	609.5
	0.137	623.5	617.5	609
	0.138	621.5	621	610
	0.139	623.5	622	609.5
	0.14	624	618.5	603
	0.141	623	619.5	606.5
	0.142	623.5	621.5	606.5
	0.143	620.5	617	608
	0.144	620	616.5	604
	0.145	619.5	620.5	605
	0.146	623.5	617.5	603.5
	0.147	622.5	621	605
	0.148	623.5	618	604
	0.149	623.5	617.5	603.5
	0.15	622	621	601
	0.151	620.5	620.5	602
	0.152	620.5	617.5	600
	0.153	625	621.5	602.5
	0.154	623.5	621.5	599
	0.155	624.5	622.5	598.5
	0.156	621.5	620	599
	0.157	622	619	598
	0.158	621.5	620.5	600
	0.159	620	621.5	601.5
	0.16	622.5	621	597
	0.161	621.5	618.5	598.5
	0.162	621.5	621.5	593.5
	0.163	620.5	622.5	596
	0.164	622.5	622	596.5
	0.165	622	621.5	596.5
	0.166	625	624	596
	0.167	619	618.5	597.5
	0.168	623.5	623.5	599
	0.169	626.5	621.5	597.5
	0.17	623	619	599
	0.171	619.5	619	596.5
	0.172	625	623.5	598
	0.173	622	621.5	598.5
	0.174	621.5	621	598
	0.175	623.5	619.5	597
	0.176	623	619.5	598.5
	0.177	625	621.5	595.5
	0.178	621.5	621	601
	0.179	623.5	620	600
	0.18	624	624	595.5
	0.181	621.5	620	600.5
	0.182	621.5	621.5	600
	0.183	621	619.5	602.5
	0.184	626.5	620	599
	0.185	623.5	620.5	600.5
	0.186	622	622.5	596
	0.187	621.5	623.5	598
	0.188	622	621.5	601.5
	0.189	622	622.5	601.5
	0.19	623.5	622	597.5
	0.191	622.5	623	600
	0.192	623	624	598.5
	0.193	624	623.5	599.5
	0.194	627	625	600
	0.195	623.5	623	599
	0.196	621	624	598.5
	0.197	623.5	623	596.5
	0.198	623	625	599
	0.199	624	624	600.5
	0.2	626	620	601
	0.201	621.5	629.5	601.5
	0.202	625.5	618	595
	0.203	623.5	622.5	600
	0.204	620.5	625	595
	0.205	625	624.5	599
	0.206	624	624.5	599
	0.207	623.5	625	596
	0.208	623.5	626	597.5
	0.209	624.5	624.5	598.5
	0.21	624.5	626	595.5
	0.211	623	622.5	597.5
	0.212	623	629	594.5
	0.213	623	627.5	595
	0.214	622	621.5	596.5
	0.215	624	625.5	598
	0.216	625.5	624	595
	0.217	623.5	623.5	597.5
	0.218	619	627	600
	0.219	617	625.5	595.5
	0.22	622.5	627	594
	0.221	620.5	622.5	595.5
	0.222	623.5	625	596
	0.223	619.5	623	595
	0.224	622.5	622.5	595
	0.225	621.5	625.5	593.5
	0.226	621	625	595.5
	0.227	621.5	623	598
	0.228	621.5	627	594.5
	0.229	618	621	599
	0.23	620.5	625	599
	0.231	623	625	597
	0.232	617	627	597
	0.233	617	624.5	599.5
	0.234	619	626.5	598
	0.235	620.5	624.5	595
	0.236	621.5	624.5	601
	0.237	622.5	629	601
	0.238	623	626	598.5
	0.239	621.5	625	595.5
	0.24	623	621.5	600.5
	0.241	619.5	626.5	603
	0.242	621.5	623.5	601.5
	0.243	619.5	628.5	602.5
	0.244	618.5	625.5	604
	0.245	617	625.5	603
	0.246	623.5	626	605.5
	0.247	618.5	625	604.5
	0.248	621	624.5	602.5
	0.249	622	622.5	604.5
	0.25	621.5	621.5	606.5
	0.251	623	624.5	608.5
	0.252	619.5	623	602
	0.253	618	624	606
	0.254	620.5	626.5	609
	0.255	621	625.5	609.5
	0.256	621.5	624	609
	0.257	621	625	611
	0.258	624.5	624	611
	0.259	623	622.5	613
	0.26	621.5	623.5	611.5
	0.261	618	625	614.5
	0.262	621.5	621.5	615
	0.263	620.5	623.5	615
	0.264	620.5	625	614.5
	0.265	619	623	612.5
	0.266	623	625	612.5
	0.267	621.5	622.5	614
	0.268	621.5	622	615.5
	0.269	621	621.5	617.5
	0.27	620	623.5	615.5
	0.271	620	621.5	617.5
	0.272	619	623	617
	0.273	619	623.5	615
	0.274	620.5	624	618
	0.275	620.5	620.5	618.5
	0.276	621.5	621.5	618
	0.277	619.5	622.5	615.5
	0.278	621.5	622	616
	0.279	621	620.5	616.5
	0.28	621.5	623.5	617.5
	0.281	622	621.5	615.5
	0.282	619	624	616
	0.283	623.5	624	618
	0.284	619.5	621	617
	0.285	620.5	620	615.5
	0.286	619	624	618
	0.287	618.5	622	617.5
	0.288	618	624	616
	0.289	620.5	623.5	616.5
	0.29	618.5	622	616
	0.291	621	619.5	614
	0.292	621	621	617.5
	0.293	617.5	621	618.5
	0.294	618.5	624	618
	0.295	618.5	622	616.5
	0.296	617	619	621.5
	0.297	620	620.5	618.5
	0.298	615.5	618	624.5
	0.299	618.5	621	619
	0.3	619	618.5	616.5
	0.301	616.5	620.5	619.5
	0.302	616	621	621
	0.303	615	621.5	621.5
	0.304	619.5	620	619.5
	0.305	618	621.5	622
	0.306	616	620.5	621
	0.307	619.5	619.5	623.5
	0.308	616	617.5	622
	0.309	617.5	621.5	623.5
	0.31	619	620	623
	0.311	616	619.5	622
	0.312	619.5	619.5	622
	0.313	618.5	620	622
	0.314	616	619.5	624
	0.315	617	622	623
	0.316	618.5	620	626.5
	0.317	616	621.5	626
	0.318	619	621.5	624
	0.319	616.5	619	624.5
	0.32	617.5	618.5	631
	0.321	621	617	626.5
	0.322	620	621	628
	0.323	618.5	619.5	627
	0.324	616.5	617.5	626
	0.325	617.5	623	628.5
	0.326	618.5	617	627.5
	0.327	619.5	618	630.5
	0.328	614	622	628.5
	0.329	619	622.5	629
	0.33	619.5	620	631
	0.331	620	620	629
	0.332	620.5	621.5	632.5
	0.333	622	621.5	631.5
	0.334	624	620	632
	0.335	620.5	623	629
	0.336	621.5	620.5	630.5
	0.337	617.5	620	634
	0.338	620	619	633.5
	0.339	618	621.5	633.5
	0.34	624	620.5	633
	0.341	623.5	619.5	635
	0.342	620.5	617.5	634
	0.343	620	622	636
	0.344	625.5	618.5	633
	0.345	622	620.5	639.5
	0.346	621.5	620	633.5
	0.347	621.5	620.5	636
	0.348	620.5	615.5	631
	0.349	627	622.5	636
	0.35	626	623	636
	0.351	625	623.5	637.5
	0.352	618.5	621.5	633.5
	0.353	622	620.5	632
	0.354	622.5	622.5	635
	0.355	627	622	636
	0.356	622	618	636
	0.357	624.5	623	638
	0.358	625	619.5	637.5
	0.359	622.5	625	636
	0.36	624.5	623	636
	0.361	626	620.5	639.5
	0.362	625.5	626.5	636
	0.363	625	619	638
	0.364	624	623	639
	0.365	621.5	624.5	642
	0.366	624.5	622.5	642
	0.367	624	619.5	639
	0.368	628	621.5	639.5
	0.369	623	622.5	638
	0.37	628.5	622.5	639.5
	0.371	626	623	636
	0.372	627	621.5	636
	0.373	626.5	618	639
	0.374	625	624	635.5
	0.375	627.5	624.5	640
	0.376	626	619	639.5
	0.377	627.5	623	640
	0.378	628.5	623	639.5
	0.379	624	621	638
	0.38	625	627	637
	0.381	628	621	637.5
	0.382	623.5	621.5	635.5
	0.383	626.5	622.5	635.5
	0.384	624.5	621.5	636
	0.385	626	626	636
	0.386	625	621	636
	0.387	628	622.5	635
	0.388	627	623.5	636
	0.389	629	623.5	633.5
	0.39	624.5	624	634.5
	0.391	623	622.5	636
	0.392	621.5	624	634.5
	0.393	626.5	621.5	632.5
	0.394	625	620.5	635
	0.395	622	623	632.5
	0.396	626	621.5	630.5
	0.397	624	620.5	629.5
	0.398	620	627.5	635
	0.399	621.5	624	632
	0.4	624	620	630.5
	0.401	623.5	624	629.5
	0.402	622.5	623.5	631
	0.403	621	622.5	633
	0.404	623	621	627.5
	0.405	620.5	622.5	632
	0.406	622.5	621.5	629
	0.407	623	620.5	630
	0.408	625	622	629
	0.409	621	621.5	632
	0.41	623	622.5	629.5
	0.411	621	622.5	629
	0.412	623	625	627
	0.413	619.5	621.5	628
	0.414	621	620	626.5
	0.415	621.5	624.5	625
	0.416	623	620	625
	0.417	625	622.5	626.5
	0.418	620.5	624	628
	0.419	621.5	622	625
	0.42	622.5	622.5	626.5
	0.421	620	622	625
	0.422	620.5	623.5	625
	0.423	621.5	620.5	623.5
	0.424	619.5	625	622.5
	0.425	619	623.5	623
	0.426	622.5	624	624.5
	0.427	620.5	623	624
	0.428	622.5	619	621.5
	0.429	621.5	623.5	622.5
	0.43	622	622	619
	0.431	621	620.5	623
	0.432	621.5	620	620.5
	0.433	621	620	620.5
	0.434	623.5	621.5	622.5
	0.435	621	620.5	625
	0.436	621	623	621
	0.437	625	620.5	623
	0.438	620.5	620	620
	0.439	620.5	621.5	617
	0.44	624.5	624	616
	0.441	623.5	625	618.5
	0.442	624	619.5	620.5
	0.443	622	623.5	621.5
	0.444	622.5	619	623
	0.445	621.5	619	620.5
	0.446	620.5	623	621.5
	0.447	624.5	625.5	620.5
	0.448	623	622	622.5
	0.449	623	625	621
	0.45	625.5	622.5	621
	0.451	627.5	626	619
	0.452	623.5	623	620.5
	0.453	622	622.5	619
	0.454	621.5	623	616.5
	0.455	621.5	621	621.5
	0.456	624	622	620
	0.457	626	621.5	621
	0.458	626	619	620.5
	0.459	624	621	621.5
	0.46	622.5	625	619.5
	0.461	625	620	621.5
	0.462	621	620.5	621.5
	0.463	621.5	621	619
	0.464	623	624.5	620.5
	0.465	623.5	622	621.5
	0.466	625	619	622
	0.467	626.5	624	619.5
	0.468	622.5	621.5	623
	0.469	620.5	623.5	623
	0.47	625	622.5	620.5
	0.471	625	622	621.5
	0.472	621.5	621.5	623
	0.473	621.5	620.5	619.5
	0.474	623.5	622	619.5
	0.475	624.5	623	624
	0.476	620.5	621	624
	0.477	624.5	622	622.5
	0.478	623	621	623.5
	0.479	625.5	620	623
	0.48	621.5	621	622.5
	0.481	620.5	622	623.5
	0.482	622	621.5	622
	0.483	624.5	624.5	621
	0.484	622	620.5	619.5
	0.485	620.5	621.5	622
	0.486	620.5	624	622
	0.487	622	622.5	624.5
	0.488	621.5	621.5	622.5
	0.489	621	621.5	621.5
	0.49	623	622	624
	0.491	620.5	622	626.5
	0.492	622.5	620	620.5
	0.493	623.5	618.5	625.5
	0.494	625	624.5	624
	0.495	620	621	618.5
	0.496	623.5	620.5	622.5
	0.497	623.5	621.5	621.5
	0.498	620.5	618	624.5
	0.499	620	620	625.5
	0.5	620.5	621.5	621.5
	0.501	618	618.5	622
	0.502	622.5	624	622
	0.503	621.5	621.5	621.5
	0.504	622	618.5	621.5
	0.505	620	620	625
	0.506	619.5	622.5	621.5
	0.507	619	617	623
	0.508	618	620.5	624.5
	0.509	620	618.5	622.5
	0.51	621.5	623	622.5
	0.511	617	622	626
	0.512	621.5	622	622.5
	0.513	621.5	618.5	621.5
	0.514	620.5	621	621.5
	0.515	618	621.5	621.5
	0.516	621	618.5	621.5
	0.517	623	620.5	619
	0.518	621	624	625
	0.519	619.5	621.5	621
	0.52	621	620.5	618
	0.521	618	619.5	621
	0.522	621.5	619.5	625.5
	0.523	621	619	620
	0.524	618	619	620
	0.525	620.5	616.5	622
	0.526	623	620	620.5
	0.527	619.5	624	625
	0.528	619.5	621	620.5
	0.529	621.5	620	622
	0.53	621.5	621.5	624
	0.531	624	621.5	623
	0.532	621.5	619	621.5
	0.533	623	621.5	621.5
	0.534	621.5	622	620.5
	0.535	622	619.5	618.5
	0.536	621.5	621.5	621.5
	0.537	621	621	619.5
	0.538	623	621.5	621.5
	0.539	624.5	620.5	619.5
	0.54	621.5	624	618.5
	0.541	622.5	621.5	622.5
	0.542	622	622.5	621.5
	0.543	622	619.5	619.5
	0.544	620.5	621.5	621
	0.545	622.5	619.5	621.5
	0.546	621.5	622	619.5
	0.547	623.5	621.5	621
	0.548	623	625	622
	0.549	625	621.5	621.5
	0.55	623.5	621.5	618
	0.551	621.5	620.5	621
	0.552	624.5	621.5	619.5
	0.553	625	624	617
	0.554	622.5	623	620
	0.555	621	624.5	620
	0.556	621.5	623.5	619
	0.557	624.5	622	617
	0.558	619.5	623	618.5
	0.559	624.5	621.5	623.5
	0.56	621.5	624.5	621
	0.561	620.5	621.5	618
	0.562	623.5	621	621.5
	0.563	621.5	624	618.5
	0.564	618.5	622	622
	0.565	625	619.5	621.5
	0.566	621.5	623.5	619
	0.567	622	626	620
	0.568	624	623.5	615.5
	0.569	620.5	625	620
	0.57	625	625	619.5
	0.571	624	625	621.5
	0.572	624	627.5	616.5
	0.573	620.5	624	621.5
	0.574	620.5	626	617
	0.575	620.5	621	619
	0.576	624	624.5	618.5
	0.577	622.5	623.5	620.5
	0.578	625	624	621
	0.579	619	623	619.5
	0.58	626	624.5	620.5
	0.581	621.5	627.5	621
	0.582	622	623.5	624
	0.583	624	622.5	621.5
	0.584	622	625	620
	0.585	622	625	618.5
	0.586	621	626	621.5
	0.587	623.5	624.5	618
	0.588	621.5	628.5	621.5
	0.589	621.5	627.5	622
	0.59	622	626.5	617.5
	0.591	623	628	620.5
	0.592	621.5	625	621
	0.593	622.5	624.5	623.5
	0.594	622.5	624	623
	0.595	624.5	625	625.5
	0.596	621.5	625.5	617.5
	0.597	619.5	625	624
	0.598	624.5	623	621.5
	0.599	621	621.5	623.5
	0.6	622	624	622
	0.601	621.5	623	625
	0.602	621.5	626	625
	0.603	619.5	623.5	623
	0.604	618.5	626.5	624
	0.605	620.5	626.5	622
	0.606	619	624.5	626.5
	0.607	621.5	623.5	623.5
	0.608	621.5	622.5	625
	0.609	621	625	623
	0.61	622.5	623	624.5
	0.611	620.5	623	628.5
	0.612	618.5	622	623
	0.613	621	618	624
	0.614	619.5	621.5	624
	0.615	620.5	626	625.5
	0.616	618	625.5	625
	0.617	620	621.5	626
	0.618	619	623	627.5
	0.619	620	621	626
	0.62	617	624	622.5
	0.621	620	624	624
	0.622	618	620	627.5
	0.623	621.5	622.5	624
	0.624	618.5	625.5	621.5
	0.625	617.5	620.5	624
	0.626	620.5	622	624
	0.627	619	622.5	625
	0.628	619	619	629
	0.629	619	625	626
	0.63	621.5	621.5	625
	0.631	620	621	625
	0.632	620	621.5	623
	0.633	620.5	621	626
	0.634	619.5	619.5	624.5
	0.635	618.5	621	625
	0.636	618	623	625
	0.637	620	620	624
	0.638	621.5	621	622
	0.639	621	622	625.5
	0.64	621	621.5	626
	0.641	620.5	620.5	625
	0.642	619	623	623
	0.643	620	621.5	627.5
	0.644	621	621	624
	0.645	621	620	621.5
	0.646	619.5	623.5	622
	0.647	621.5	623.5	623.5
	0.648	620	617.5	623
	0.649	620.5	619.5	620.5
	0.65	622.5	619.5	622
	0.651	621.5	621.5	626.5
	0.652	620.5	621.5	625
	0.653	619	621.5	624
	0.654	622.5	621	622
	0.655	623	622.5	623
	0.656	622	621	621
	0.657	624	623	625
	0.658	623	624	624.5
	0.659	621.5	614.5	621.5
	0.66	622.5	621.5	619.5
	0.661	623.5	621.5	621
	0.662	626.5	618.5	621
	0.663	624.5	618	621
	0.664	622.5	621.5	620
	0.665	624.5	618.5	621
	0.666	623.5	624	619.5
	0.667	625	619.5	620.5
	0.668	625	621.5	618.5
	0.669	622	618.5	620
	0.67	620	620	622
	0.671	624	618	621.5
	0.672	623	618.5	623.5
	0.673	623	620	620.5
	0.674	626	620	618
	0.675	621.5	620	619.5
	0.676	626	619.5	621.5
	0.677	627	619.5	619.5
	0.678	621	617	621
	0.679	622.5	619	619
	0.68	621.5	622	621.5
	0.681	622	621	618.5
	0.682	623	615	620.5
	0.683	622.5	618	618
	0.684	623.5	621.5	619.5
	0.685	624.5	618	618
	0.686	623.5	619	621
	0.687	621.5	619.5	619
	0.688	622	621.5	619.5
	0.689	621	619.5	619.5
	0.69	626.5	617.5	617
	0.691	622.5	617	620
	0.692	623.5	617	621.5
	0.693	621.5	617	621.5
	0.694	620.5	620.5	619.5
	0.695	623	617	621.5
	0.696	620	617	618.5
	0.697	621.5	618.5	617.5
	0.698	621.5	618	620.5
	0.699	621.5	620.5	617
	0.7	626.5	619.5	620
	0.701	621	618.5	622
	0.702	620.5	618.5	621.5
	0.703	621	620	620.5
	0.704	620.5	617	622.5
	0.705	622	620	623
	0.706	621.5	617.5	620.5
	0.707	618.5	619.5	624
	0.708	621.5	618.5	624
	0.709	619	619	622
	0.71	623.5	618	621.5
	0.711	618.5	616.5	623.5
	0.712	622	617	619.5
	0.713	621.5	614.5	622
	0.714	620	620	623
	0.715	620.5	620	620.5
	0.716	621.5	617.5	624
	0.717	623	619.5	621.5
	0.718	620	619	623
	0.719	621	618.5	621.5
	0.72	619	621	624
	0.721	624	621.5	621.5
	0.722	621.5	620.5	621.5
	0.723	624	621.5	621.5
	0.724	617.5	617	621.5
	0.725	619.5	618	623.5
	0.726	621.5	621	625
	0.727	619	621	621
	0.728	621.5	623.5	622.5
	0.729	620.5	618	623
	0.73	622	620	624
	0.731	620	621.5	624
	0.732	624.5	622	622.5
	0.733	622.5	622.5	621.5
	0.734	622	621.5	623
	0.735	622	621.5	623
	0.736	623.5	621.5	624.5
	0.737	620.5	620.5	620.5
	0.738	624.5	622	623.5
	0.739	624.5	625	623
	0.74	622	621.5	622
	0.741	621.5	622	622.5
	0.742	624	622.5	622.5
	0.743	621	619.5	620.5
	0.744	619.5	624	624.5
	0.745	623	619.5	620.5
	0.746	624	623	618.5
	0.747	623.5	621.5	627.5
	0.748	627	622	617
	0.749	625	625.5	621.5
	0.75	620.5	618.5	619
	0.751	622	618.5	621
	0.752	622	626	621.5
	0.753	624	623	619.5
	0.754	626	621.5	620
	0.755	625	623.5	618.5
	0.756	621.5	622	622.5
	0.757	626.5	624	618
	0.758	624.5	625.5	618.5
	0.759	627	624	619.5
	0.76	624.5	625	621
	0.761	621.5	624	619
	0.762	621.5	624.5	616.5
	0.763	622.5	628.5	614.5
	0.764	624	625	619
	0.765	626	625	621
	0.766	624	624.5	622.5
	0.767	622.5	623.5	616
	0.768	621.5	624	618
	0.769	624	626	619
	0.77	624.5	627.5	614
	0.771	628.5	624.5	617.5
	0.772	625.5	625.5	618.5
	0.773	624	626	616
	0.774	625.5	624	617.5
	0.775	624	625.5	619.5
	0.776	627.5	627	616
	0.777	625	627.5	617.5
	0.778	622.5	621.5	618.5
	0.779	625	625	618.5
	0.78	625.5	624.5	621.5
	0.781	624.5	624.5	621
	0.782	625	624	620.5
	0.783	628	627	615.5
	0.784	622.5	624	621.5
	0.785	622	630	618.5
	0.786	622	625	620
	0.787	621	625	620.5
	0.788	626	626.5	620.5
	0.789	620	626	619.5
	0.79	620.5	626.5	621.5
	0.791	621.5	625	619
	0.792	623	626	626.5
	0.793	621	628.5	621
	0.794	622	628	621.5
	0.795	621.5	625.5	620
	0.796	623	625.5	622
	0.797	619.5	626.5	621
	0.798	621.5	625	622
	0.799	621	626	620.5
	0.8	625	624.5	620
	0.801	620.5	626.5	625.5
	0.802	623	622.5	623.5
	0.803	621.5	630	619
	0.804	619.5	624.5	624
	0.805	618.5	627	624.5
	0.806	618	626	624.5
	0.807	617.5	623.5	621.5
	0.808	618.5	625	621.5
	0.809	620.5	625	621.5
	0.81	618.5	621.5	622.5
	0.811	617	622.5	625
	0.812	618	621	620.5
	0.813	617.5	621.5	623.5
	0.814	615.5	620	625
	0.815	618.5	623.5	622
	0.816	616	621	626.5
	0.817	615.5	622	622.5
	0.818	619	622	625
	0.819	617	623	625.5
	0.82	616.5	625.5	621
	0.821	617	623	622.5
	0.822	619.5	621	624.5
	0.823	617.5	619.5	620.5
	0.824	617	621	623.5
	0.825	617	621	622
	0.826	618	622.5	625.5
	0.827	617	624	625
	0.828	615.5	621	623
	0.829	614.5	619	623
	0.83	618.5	619.5	621.5
	0.831	617.5	620	628
	0.832	615.5	617.5	623.5
	0.833	619	620	622.5
	0.834	615.5	623.5	626.5
	0.835	615.5	622.5	625
	0.836	616	620.5	623
	0.837	616	620.5	622
	0.838	615.5	623.5	627.5
	0.839	616.5	622	624
	0.84	616	616.5	620.5
	0.841	619.5	622	623
	0.842	621	621.5	629
	0.843	617	620.5	621.5
	0.844	618.5	619	620.5
	0.845	617	621.5	621.5
	0.846	621	617.5	625.5
	0.847	615.5	619.5	621.5
	0.848	616.5	620.5	623
	0.849	619	620	621.5
	0.85	615.5	617	626
	0.851	617.5	620	623.5
	0.852	620.5	621	619.5
	0.853	617.5	619.5	620.5
	0.854	617.5	621.5	622
	0.855	622.5	622.5	621.5
	0.856	619.5	620.5	620.5
	0.857	618	621.5	623.5
	0.858	618	618.5	621.5
	0.859	617.5	620	620
	0.86	621.5	617.5	621.5
	0.861	620	623.5	618.5
	0.862	619.5	621	620.5
	0.863	618.5	622.5	619
	0.864	619.5	618.5	619.5
	0.865	621.5	622.5	621.5
	0.866	622	622.5	621.5
	0.867	620	621	621.5
	0.868	620.5	620	620.5
	0.869	621	621.5	619.5
	0.87	618.5	620	619.5
	0.871	622	621.5	617.5
	0.872	621.5	621.5	622
	0.873	621	621.5	618.5
	0.874	620	622	621.5
	0.875	619	621	618
	0.876	620.5	621	620
	0.877	618.5	621	618.5
	0.878	623	624	621.5
	0.879	618.5	624	622.5
	0.88	621	619.5	621.5
	0.881	625	624.5	619.5
	0.882	620.5	622	621.5
	0.883	623	621.5	619.5
	0.884	626	622.5	620.5
	0.885	621.5	621.5	619.5
	0.886	622	621.5	623
	0.887	623	622.5	620.5
	0.888	624	621.5	621.5
	0.889	625	618.5	621.5
	0.89	625.5	621.5	622.5
	0.891	622	623.5	621.5
	0.892	621	625	620.5
	0.893	625.5	616.5	624
	0.894	624.5	623	623.5
	0.895	617.5	618.5	625.5
	0.896	620.5	621.5	623.5
	0.897	621.5	622	622
	0.898	626	621	625.5
	0.899	621.5	619.5	625
	0.9	627	619.5	623
	0.901	626	618.5	621.5
	0.902	625	622.5	624
	0.903	624	623	619.5
	0.904	621.5	620.5	624.5
	0.905	622	619.5	623.5
	0.906	624.5	622.5	626
	0.907	622	619.5	621.5
	0.908	625.5	624	626.5
	0.909	622	624.5	623.5
	0.91	626.5	618	626.5
	0.911	623.5	622.5	623.5
	0.912	623	624.5	624.5
	0.913	623.5	623	625
	0.914	624	623.5	623.5
	0.915	619	621.5	624
	0.916	624	619.5	624.5
	0.917	626	621.5	625
	0.918	622	621.5	626.5
	0.919	624.5	624.5	623
	0.92	623.5	620	623
	0.921	625	624.5	624.5
	0.922	621	620.5	621.5
	0.923	625	618.5	625
	0.924	626	618.5	624.5
	0.925	626.5	624.5	625
	0.926	621.5	620	620
	0.927	626.5	623.5	623.5
	0.928	623	619	624
	0.929	626.5	623	624.5
	0.93	623	621	623
	0.931	624	623	624
	0.932	623.5	621.5	624.5
	0.933	626	621.5	624.5
	0.934	620.5	626	622.5
	0.935	625	623.5	623.5
	0.936	626	621	620.5
	0.937	624	627	622
	0.938	624	622.5	628
	0.939	623	623	621.5
	0.94	626	623	623
	0.941	625.5	623	619
	0.942	618.5	624	622
	0.943	625.5	622	624.5
	0.944	622	621.5	623.5
	0.945	621.5	623.5	621.5
	0.946	623	621	619.5
	0.947	623.5	624	621.5
	0.948	622.5	621.5	618.5
	0.949	624	621.5	618.5
	0.95	622.5	621.5	620.5
	0.951	624	624	624
	0.952	623.5	622.5	619
	0.953	623	622	618
	0.954	624.5	621	620.5
	0.955	621.5	618.5	619.5
	0.956	622.5	622.5	620
	0.957	623.5	622.5	617
	0.958	621	621.5	619.5
	0.959	622.5	622.5	622
	0.96	621.5	622.5	616.5
	0.961	622	621.5	621.5
	0.962	622	620	617.5
	0.963	624	623	620
	0.964	626	622.5	619.5
	0.965	625.5	621	615.5
	0.966	623	621.5	616.5
	0.967	621	621.5	616.5
	0.968	625	625.5	617
	0.969	620	621.5	617
	0.97	621.5	622	617.5
	0.971	620	623	617.5
	0.972	621.5	622.5	614.5
	0.973	619.5	622	615.5
	0.974	620	625	620.5
	0.975	622	625	616.5
	0.976	619	622.5	618
	0.977	621.5	623	613.5
	0.978	624	622	615.5
	0.979	621	625.5	615.5
	0.98	622	622	616
	0.981	622	622.5	615.5
	0.982	622.5	621.5	618
	0.983	623.5	624.5	615.5
	0.984	620	621	616.5
	0.985	621.5	623	615.5
	0.986	619	623	617
	0.987	624.5	626.5	618.5
	0.988	620.5	623	617
	0.989	621.5	622	617.5
	0.99	625.5	623	617
	0.991	620	623	617.5
	0.992	618.5	621	618
	0.993	619.5	624	615.5
	0.994	622	621	619
	0.995	622.5	623.5	617
	0.996	622.5	622.5	620
	0.997	621.5	622.5	621
	0.998	621.5	627.5	620.5
	0.999	625	625.5	616
	1	622.5	622	621.5
	1.001	624	624	621.5
	1.002	624	624.5	622
	1.003	619.5	624.5	620
	1.004	621	626.5	620.5
	1.005	628	623	619
	1.006	621.5	623	621
	1.007	624	624	622
	1.008	625	620.5	621
	1.009	622.5	623	621.5
	1.01	623.5	626.5	624
	1.011	621.5	624	621
	1.012	623	622	622.5
	1.013	626.5	623.5	621.5
	1.014	622.5	624.5	621.5
	1.015	623.5	624	624
	1.016	624	624	622
	1.017	622	623.5	625
	1.018	622	620.5	624
	1.019	621.5	623.5	625.5
	1.02	623	623	624
	1.021	620.5	621.5	624
	1.022	625	622.5	621.5
	1.023	626.5	622	624.5
	1.024	624	619	629
	1.025	621.5	622	628
	1.026	622	622	625
	1.027	621	622.5	626
	1.028	624	617.5	623.5
	1.029	621	621.5	624
	1.03	622.5	619	624.5
	1.031	620	620.5	626
	1.032	624.5	621.5	620.5
	1.033	624.5	619	625.5
	1.034	621	621.5	621
	1.035	626	621	625
	1.036	625	620	624
	1.037	623.5	618	623
	1.038	624	618.5	623
	1.039	623	624	621.5
	1.04	623	617.5	622
	1.041	621.5	621.5	624.5
	1.042	620	618.5	624
	1.043	623.5	620	626
	1.044	621	618	621.5
	1.045	621.5	617	622.5
	1.046	620.5	618	622.5
	1.047	621.5	617.5	626.5
	1.048	622	617	624.5
	1.049	621.5	620.5	624
	1.05	621.5	616.5	626
	1.051	623.5	621	625
	1.052	621.5	616	626
	1.053	621.5	620.5	626
	1.054	619.5	619.5	623.5
	1.055	621.5	619	622.5
	1.056	622	624	621.5
	1.057	621.5	621.5	622
	1.058	622.5	618	626
	1.059	620	619	622
	1.06	618	619.5	622
	1.061	617.5	618.5	623
	1.062	623	618	620.5
	1.063	621.5	618	619.5
	1.064	622	622.5	621.5
	1.065	620	620.5	622.5
	1.066	618	621.5	621.5
	1.067	623.5	621.5	621.5
	1.068	621.5	619.5	622
	1.069	617	621.5	621.5
	1.07	621	620.5	621.5
	1.071	622	621.5	623
	1.072	624	621.5	621.5
	1.073	621	620.5	621.5
	1.074	620	619	618
	1.075	620.5	622.5	622.5
	1.076	619.5	619.5	620.5
	1.077	624	623	622.5
	1.078	621.5	621.5	620.5
	1.079	619	622	624
	1.08	619.5	621.5	622.5
	1.081	621.5	620.5	620
	1.082	621.5	619.5	621
	1.083	621.5	621.5	620
	1.084	624.5	625	621.5
	1.085	624	621.5	624
	1.086	621.5	627	620.5
	1.087	622	626	622.5
	1.088	621.5	622	617.5
	1.089	619.5	621.5	621
	1.09	624.5	625	622
	1.091	621	624.5	622.5
	1.092	621.5	622	625
	1.093	621.5	621.5	621.5
	1.094	622.5	622.5	622
	1.095	621.5	623	623.5
	1.096	623.5	621.5	627
	1.097	618.5	624.5	626.5
	1.098	621.5	624.5	623.5
	1.099	622	623.5	620
	1.1	621.5	621.5	620.5
	1.101	621.5	622.5	623.5
	1.102	621.5	624.5	625
	1.103	621.5	623.5	627.5
	1.104	619.5	622.5	625.5
	1.105	624	624	622.5
	1.106	621.5	622.5	629
	1.107	621.5	624	626.5
	1.108	620	624.5	627
	1.109	621.5	625.5	625
	1.11	623	623	627
	1.111	623.5	624.5	626.5
	1.112	621.5	621.5	626.5
	1.113	621.5	624.5	627
	1.114	618.5	625	624
	1.115	619.5	624.5	624.5
	1.116	622	621.5	628
	1.117	621.5	623.5	627
	1.118	620.5	625	627
	1.119	621.5	626.5	626.5
	1.12	625	622	627
	1.121	624	625.5	628.5
	1.122	620.5	622	626.5
	1.123	621.5	624.5	624
	1.124	621.5	623.5	625
	1.125	624	621	622
	1.126	624	625.5	625
	1.127	620	625.5	625
	1.128	621.5	621.5	625
	1.129	621.5	625.5	625
	1.13	623.5	623.5	626
	1.131	625	623.5	625.5
	1.132	622.5	623.5	624
	1.133	623.5	625.5	623.5
	1.134	623	622.5	627.5
	1.135	621.5	621.5	625
	1.136	621.5	627	624.5
	1.137	623.5	623.5	623.5
	1.138	621.5	623.5	625
	1.139	621.5	622.5	624
	1.14	620.5	623.5	625
	1.141	621.5	626	624
	1.142	623	621	622.5
	1.143	625.5	622.5	621.5
	1.144	621.5	623	623.5
	1.145	620.5	624	619
	1.146	626	624	619.5
	1.147	618	624	621
	1.148	625	622	621.5
	1.149	621	624	616.5
	1.15	621.5	624.5	621.5
	1.151	622.5	623.5	619.5
	1.152	620	624	619
	1.153	624	621.5	621.5
	1.154	622.5	620	618
	1.155	623	618.5	620
	1.156	620	621.5	616.5
	1.157	623.5	624.5	619
	1.158	625	625.5	618
	1.159	621.5	620.5	622
	1.16	625.5	624.5	616.5
	1.161	622.5	619	619
	1.162	618.5	621.5	620
	1.163	627	620	617.5
	1.164	621.5	620.5	618
	1.165	622	624.5	617.5
	1.166	623	624	616.5
	1.167	621.5	627	619
	1.168	619.5	625	617.5
	1.169	623	623	615.5
	1.17	622	626	615.5
	1.171	621.5	621.5	616.5
	1.172	622	624.5	619
	1.173	625	620.5	618
	1.174	625	625	617
	1.175	624	622	617
	1.176	625.5	620.5	616.5
	1.177	625	622.5	616
	1.178	622	622.5	618.5
	1.179	621.5	623	615.5
	1.18	623	624	619.5
	1.181	623.5	624.5	615
	1.182	621.5	626	616
	1.183	620.5	622	619.5
	1.184	621.5	623	616.5
	1.185	623	623	617
	1.186	620	623.5	618
	1.187	619	622	617
	1.188	620	621.5	621
	1.189	620.5	621.5	616.5
	1.19	618.5	621.5	617.5
	1.191	622.5	621.5	619
	1.192	621.5	623	622.5
	1.193	621.5	620.5	623.5
	1.194	620.5	623.5	621.5
	1.195	617.5	619	620.5
	1.196	623	623	618.5
	1.197	623.5	621.5	620
	1.198	621	625	621.5
	1.199	619.5	623.5	622
	1.2	624.5	621.5	617
	1.201	621	619.5	620
	1.202	621.5	622.5	619
	1.203	621.5	618.5	621
	1.204	621	622.5	623.5
	1.205	619	621.5	621
	1.206	623	620.5	621.5
	1.207	621.5	623.5	624
	1.208	619.5	620	621.5
	1.209	619.5	621.5	625
	1.21	621.5	622.5	626
	1.211	620	619.5	627
	1.212	619.5	621	625.5
	1.213	622	621.5	623.5
	1.214	621	625	624.5
	1.215	624	621	623.5
	1.216	619	622.5	627.5
	1.217	618	620	626
	1.218	619	620.5	623
	1.219	619.5	620.5	626.5
	1.22	620	617.5	625
	1.221	621	621.5	625
	1.222	618.5	617	624.5
	1.223	622	621	625
	1.224	621.5	620.5	623
	1.225	621	616	622
	1.226	621.5	619.5	624
	1.227	621	617	624.5
	1.228	619.5	619	625
	1.229	619	619.5	620
	1.23	622.5	616	621
	1.231	616	618.5	625
	1.232	618	615	622
	1.233	621.5	618.5	623.5
	1.234	621	616.5	621
	1.235	619.5	615.5	621.5
	1.236	620	615	620
	1.237	622	616	623.5
	1.238	621.5	619	621.5
	1.239	619.5	615.5	624
	1.24	622	618	618.5
	1.241	624.5	618.5	622
	1.242	620	618.5	619.5
	1.243	623	618	623
	1.244	620.5	615	621
	1.245	619.5	615.5	621.5
	1.246	623.5	616	623.5
	1.247	625	616	621.5
	1.248	622.5	614.5	619.5
	1.249	621.5	616.5	624
	1.25	622	619	623.5
	1.251	626.5	613.5	618
	1.252	622.5	618	621
	1.253	625.5	615	621.5
	1.254	625	614	620
	1.255	621.5	617.5	621
	1.256	624	617.5	621
	1.257	625.5	617.5	620
	1.258	623	615.5	620
	1.259	623	619	619.5
	1.26	624.5	614.5	616.5
	1.261	623	618	616.5
	1.262	624	620	620.5
	1.263	627	621.5	618.5
	1.264	622.5	618.5	622
	1.265	625	618.5	619.5
	1.266	624.5	615.5	618
	1.267	623	620.5	616
	1.268	626.5	620	618.5
	1.269	625	618	618
	1.27	624	621.5	620
	1.271	624	622	617
	1.272	623.5	619	620.5
	1.273	621.5	617.5	618.5
	1.274	620.5	616.5	618.5
	1.275	627	621.5	616
	1.276	621.5	616	616.5
	1.277	625	621.5	619
	1.278	621.5	621.5	616.5
	1.279	624.5	620	619.5
	1.28	626	620.5	616
	1.281	621.5	619.5	617
	1.282	624.5	620.5	614
	1.283	626	618	616
	1.284	623	621.5	618
	1.285	623	619.5	618.5
	1.286	621.5	617.5	618.5
	1.287	623.5	621.5	618.5
	1.288	622.5	619	618
	1.289	624	619.5	622.5
	1.29	621.5	624.5	615.5
	1.291	623	619	621
	1.292	622.5	620.5	618.5
	1.293	621	626	619.5
	1.294	623	622	621.5
	1.295	621.5	624	621
	1.296	622.5	623	618.5
	1.297	622.5	624	621.5
	1.298	623.5	621.5	620.5
	1.299	625.5	621.5	621.5
	1.3	621	623.5	620
	1.301	624	625	624.5
	1.302	618.5	627	625.5
	1.303	620	626	620.5
	1.304	621.5	622.5	622
	1.305	619.5	626.5	622.5
	1.306	621.5	623	621.5
	1.307	620.5	623	622.5
	1.308	623	623	623.5
	1.309	621.5	625	620.5
	1.31	622	625.5	623
	1.311	621.5	623.5	624
	1.312	622	624.5	626
	1.313	621.5	621.5	621.5
	1.314	623	624.5	625.5
	1.315	622	622.5	621.5
	1.316	623.5	624	622.5
	1.317	617.5	622	625.5
	1.318	620.5	622	628
	1.319	622	623.5	626.5
	1.32	622	624.5	625
	1.321	624	626	624
	1.322	621.5	625	627.5
	1.323	621	625.5	625.5
	1.324	620.5	623	628
	1.325	619.5	623.5	626
	1.326	625	626.5	625
	1.327	622.5	622	626.5
	1.328	620	628	624
	1.329	622	623	629
	1.33	621.5	628	624.5
	1.331	620	620.5	625.5
	1.332	621	623	625.5
	1.333	621	625.5	622.5
	1.334	620	624	624
	1.335	621.5	626	626
	1.336	621	619	622.5
	1.337	621.5	625	625
	1.338	622.5	623	625.5
	1.339	621.5	624	625.5
	1.34	623	624.5	628.5
	1.341	621.5	621.5	623.5
	1.342	625	623	624.5
	1.343	623.5	623	624
	1.344	620	630	623
	1.345	623.5	623	623
	1.346	621	624.5	623
	1.347	621.5	623	621.5
	1.348	623.5	625.5	622.5
	1.349	624	623	621.5
	1.35	624	621	624
	1.351	621.5	624.5	621.5
	1.352	622	622.5	620
	1.353	622	625	621.5
	1.354	624	625	620
	1.355	620.5	624.5	621.5
	1.356	621	623.5	622
	1.357	623	624	620.5
	1.358	620	623	619
	1.359	622.5	625.5	621.5
	1.36	623	622	619
	1.361	623.5	624.5	618.5
	1.362	622.5	625.5	620
	1.363	622	623	622.5
	1.364	621	623	618.5
	1.365	623	622	619.5
	1.366	621.5	621	621.5
	1.367	621.5	626	617.5
	1.368	621	622.5	616
	1.369	623.5	624	618.5
	1.37	620.5	622.5	619
	1.371	621.5	624.5	619
	1.372	621	621.5	621.5
	1.373	621	622.5	617.5
	1.374	621.5	625	621.5
	1.375	621.5	621.5	620
	1.376	621	625.5	618.5
	1.377	621.5	621.5	619.5
	1.378	619.5	622.5	618
	1.379	623	621.5	621
	1.38	620.5	623.5	619
	1.381	620.5	619.5	615.5
	1.382	621.5	623	619
	1.383	620.5	625.5	617.5
	1.384	621.5	622.5	617
	1.385	617.5	622.5	618.5
	1.386	622.5	620.5	616.5
	1.387	618	624	617
	1.388	623	624	619.5
	1.389	621.5	622	616.5
	1.39	618.5	621.5	621
	1.391	620.5	625.5	617.5
	1.392	619.5	622	621
	1.393	619.5	624.5	615
	1.394	619.5	620.5	621.5
	1.395	621.5	621.5	621
	1.396	617	621.5	622
	1.397	619.5	626	619.5
	1.398	617.5	622.5	621.5
	1.399	617	623	622.5
	1.4	620.5	622.5	621.5
	1.401	618	621.5	623.5
	1.402	620	621.5	621
	1.403	621	621	619.5
	1.404	618	623.5	625
	1.405	616.5	621	620.5
	1.406	620	621	621.5
	1.407	618.5	622	621
	1.408	616.5	625	624
	1.409	615	620.5	618.5
	1.41	620	622	624
	1.411	617.5	620	623
	1.412	621.5	620.5	621
	1.413	615.5	621.5	625.5
	1.414	615.5	623	620
	1.415	616.5	621.5	621.5
	1.416	617.5	623	623.5
	1.417	614.5	623	622.5
	1.418	615	622	627
	1.419	617	618.5	622.5
	1.42	618	619.5	623.5
	1.421	616	623.5	625.5
	1.422	615	620	624.5
	1.423	616.5	620.5	622
	1.424	616	618	623.5
	1.425	615	621.5	626
	1.426	613.5	620.5	624
	1.427	615.5	624	628.5
	1.428	616	617.5	626.5
	1.429	618	622	625.5
	1.43	616	617.5	627
	1.431	616	621	626.5
	1.432	617	622	624.5
	1.433	618	619.5	621.5
	1.434	618	619.5	625.5
	1.435	617.5	619.5	629
	1.436	619	617.5	624.5
	1.437	618	618	626
	1.438	618.5	621	624.5
	1.439	619.5	618.5	627
	1.44	620.5	619.5	623
	1.441	618	619	622
	1.442	617	619	622
	1.443	620	619	623
	1.444	620.5	619.5	623.5
	1.445	621.5	619.5	622.5
	1.446	620.5	616	624.5
	1.447	623	618.5	621
	1.448	619.5	619.5	622.5
	1.449	621.5	619.5	624.5
	1.45	620.5	620	622.5
	1.451	617.5	618.5	623
	1.452	620	618	621.5
	1.453	626	619.5	623
	1.454	618.5	618.5	621.5
	1.455	623	618	627
	1.456	621.5	620	626
	1.457	622	620	624.5
	1.458	621.5	618	623
	1.459	622.5	617.5	621.5
	1.46	623	617.5	623
	1.461	624	617.5	625
	1.462	621.5	616.5	622.5
	1.463	621.5	620.5	621.5
	1.464	621.5	622.5	622.5
	1.465	621.5	618.5	621.5
	1.466	616	619.5	623
	1.467	619	615.5	622.5
	1.468	622	618.5	621
	1.469	624.5	618.5	621
	1.47	623	615.5	624
	1.471	621.5	621.5	621.5
	1.472	620.5	621.5	622
	1.473	623.5	621.5	620.5
	1.474	622.5	623	624
	1.475	624	620.5	623
	1.476	624	620	621.5
	1.477	623	621	621
	1.478	623	625	620.5
	1.479	623	619	621.5
	1.48	623.5	622.5	620
	1.481	625	619	618.5
	1.482	623.5	626	618.5
	1.483	621.5	622.5	617
	1.484	622.5	621	621.5
	1.485	623	623.5	620
	1.486	621	622.5	621
	1.487	622	623	621.5
	1.488	623	622.5	621.5
	1.489	625	620	623.5
	1.49	623	622	621.5
	1.491	625	623	622.5
	1.492	623.5	619	619
	1.493	622.5	626	619
	1.494	622.5	626.5	621.5
	1.495	622.5	621.5	622.5
	1.496	624.5	622.5	623
	1.497	625.5	623.5	619.5
	1.498	623	626	619.5
	1.499	622.5	625.5	622
	1.5	625	624	621
	1.501	621.5	627.5	620.5
	1.502	624	629	620.5
	1.503	626	628	621
	1.504	624	626.5	621.5
	1.505	623	626	620.5
	1.506	626.5	622.5	622.5
	1.507	625	624	622
	1.508	627.5	627.5	622.5
	1.509	622.5	625	621.5
	1.51	621.5	624	621.5
	1.511	621.5	630	624.5
	1.512	622	621.5	621.5
	1.513	622	629	623.5
	1.514	625.5	629	621
	1.515	625.5	626	621.5
	1.516	627	623	622.5
	1.517	624.5	623.5	625
	1.518	624	627	621.5
	1.519	626	624	620
	1.52	624	624.5	619
	1.521	625	625.5	622.5
	1.522	625	624.5	622.5
	1.523	626.5	624.5	622
	1.524	623	625.5	621
	1.525	627	624	625
	1.526	622.5	626	618.5
	1.527	622.5	625	617.5
	1.528	622.5	626	617
	1.529	623	625	619.5
	1.53	626	621.5	622.5
	1.531	622	627	616.5
	1.532	622	625	623.5
	1.533	623.5	627.5	621.5
	1.534	621	625	619
	1.535	621.5	626	619.5
	1.536	624	625.5	618.5
	1.537	621.5	625	621
	1.538	622	627	620.5
	1.539	622	622	619.5
	1.54	622	623.5	620.5
	1.541	623.5	626	618
	1.542	621.5	623	616.5
	1.543	622.5	623.5	616
	1.544	623	628	619
	1.545	621	623	616.5
	1.546	620.5	621.5	615.5
	1.547	620.5	621.5	619.5
	1.548	622.5	624	620
	1.549	620	622.5	621.5
	1.55	621	621.5	620.5
	1.551	617.5	625.5	620
	1.552	620.5	621	615
	1.553	616.5	624	618
	1.554	621.5	619.5	615.5
	1.555	624	623.5	617.5
	1.556	621.5	626.5	619
	1.557	622	624	618.5
	1.558	623	621.5	617
	1.559	622.5	621.5	615
	1.56	620	623	620
	1.561	622.5	621.5	618.5
	1.562	619.5	619.5	614.5
	1.563	621.5	622.5	617
	1.564	620.5	624	616.5
	1.565	621.5	623	618
	1.566	622	622	619
	1.567	618.5	623.5	616.5
	1.568	623	628	618.5
	1.569	621	625.5	617
	1.57	625	623	619
	1.571	620	622	619
	1.572	623.5	625	618.5
	1.573	622	628	618.5
	1.574	621	629	619.5
	1.575	617.5	625.5	617.5
	1.576	625	621.5	621.5
	1.577	622.5	626.5	623
	1.578	619	628	620.5
	1.579	622.5	626.5	621
	1.58	619.5	624.5	616.5
	1.581	625	628.5	619
	1.582	621.5	629	621
	1.583	626	629	622.5
	1.584	624.5	625	618.5
	1.585	624.5	626.5	618
	1.586	625.5	626	619.5
	1.587	622.5	625.5	620.5
	1.588	624	624.5	619
	1.589	621.5	630	618.5
	1.59	623	623.5	621.5
	1.591	620.5	628	622
	1.592	621.5	627	622
	1.593	622.5	626.5	623.5
	1.594	621.5	629.5	620
	1.595	621	631.5	623.5
	1.596	625.5	629	622
	1.597	623	632	624
	1.598	620.5	633.5	621
	1.599	625	631.5	622
	1.6	622	630	622
	1.601	620.5	630.5	625
	1.602	621.5	630	621.5
	1.603	624.5	634.5	624.5
	1.604	620.5	633	624.5
	1.605	617.5	633.5	626
	1.606	622	633	621.5
	1.607	622	631.5	623.5
	1.608	621.5	633	626.5
	1.609	625	628	624
	1.61	622	631.5	625
	1.611	622	632.5	626
	1.612	625	634.5	621.5
	1.613	624.5	634.5	627
	1.614	624	631	625
	1.615	624	634	624
	1.616	624	636	623
	1.617	623.5	633.5	626
	1.618	625.5	636	629
	1.619	621.5	633	628.5
	1.62	626	634.5	629
	1.621	621	635.5	625
	1.622	623	637	625
	1.623	619.5	636	627.5
	1.624	624.5	636	628
	1.625	621.5	638	628.5
	1.626	623	634.5	629
	1.627	623.5	636	628
	1.628	623.5	636	628.5
	1.629	624.5	637.5	625.5
	1.63	622	637	629.5
	1.631	624.5	636	629.5
	1.632	628	639	626
	1.633	624.5	638.5	631.5
	1.634	628.5	636	626.5
	1.635	627	638	627.5
	1.636	626.5	638.5	629
	1.637	626.5	637.5	631
	1.638	626.5	640	628
	1.639	628	637.5	627.5
	1.64	625	639	627.5
	1.641	628	642	627
	1.642	625.5	640.5	627.5
	1.643	627	643	628
	1.644	627	640.5	630.5
	1.645	628	641	626.5
	1.646	627	641	627
	1.647	629	641.5	630.5
	1.648	629	643.5	629
	1.649	629.5	643	626
	1.65	627	642	631
	1.651	629	641.5	628.5
	1.652	629.5	643	625.5
	1.653	628	641	629
	1.654	628	642.5	629
	1.655	630	640	626.5
	1.656	628	639.5	629
	1.657	629	638.5	626
	1.658	629	637.5	627
	1.659	634	639	625.5
	1.66	630	639.5	629.5
	1.661	632.5	639.5	627.5
	1.662	632	638.5	628.5
	1.663	632.5	639.5	626
	1.664	631.5	642	628
	1.665	631.5	641	626.5
	1.666	631	642.5	630.5
	1.667	631.5	639.5	629
	1.668	631	644	627.5
	1.669	629	642	624
	1.67	632	640	628.5
	1.671	628	640	626.5
	1.672	629	643	629.5
	1.673	633	640	626
	1.674	630.5	643	629
	1.675	629	643	625
	1.676	631	649.5	628
	1.677	630.5	646.5	626
	1.678	628.5	647.5	629
	1.679	632	649	626.5
	1.68	630.5	647	629.5
	1.681	630.5	649	629
	1.682	631	646.5	629
	1.683	629	648.5	628.5
	1.684	629.5	644.5	629.5
	1.685	633.5	649	626
	1.686	629	646.5	625.5
	1.687	630.5	647	625.5
	1.688	628	645.5	627.5
	1.689	632	645	632.5
	1.69	631.5	643.5	629
	1.691	634.5	650	630
	1.692	629.5	644.5	627.5
	1.693	633.5	645	632.5
	1.694	629	649	633.5
	1.695	636	641.5	629.5
	1.696	634	645	628
	1.697	636	644.5	633
	1.698	633.5	644.5	630.5
	1.699	631.5	639	632
	1.7	636	643	635.5
	1.701	634.5	639.5	634
	1.702	634	646.5	632
	1.703	638	639	636
	1.704	636	639.5	634
	1.705	633.5	638	633.5
	1.706	635.5	636	636
	1.707	636	634	636
	1.708	636	634	635.5
	1.709	633.5	629.5	634.5
	1.71	638	633	640
	1.711	637.5	632	636
	1.712	636	629	635.5
	1.713	636	626	631.5
	1.714	634.5	629	633.5
	1.715	638	626.5	633
	1.716	637	623.5	635.5
	1.717	640	620	634
	1.718	638.5	620	636
	1.719	636	615	635
	1.72	638	618.5	634
	1.721	637.5	613	636
	1.722	636	612.5	636
	1.723	637.5	609	636
	1.724	636	606.5	637.5
	1.725	639	601.5	637.5
	1.726	639	601.5	636
	1.727	640	601	635.5
	1.728	636	598.5	638.5
	1.729	639.5	595	636
	1.73	638	591.5	638
	1.731	637.5	595.5	634.5
	1.732	638	586.5	634.5
	1.733	638.5	588	636
	1.734	638	584.5	636
	1.735	639	578.5	635.5
	1.736	639	574.5	634.5
	1.737	640.5	570.5	633
	1.738	639	568	632
	1.739	638	565	637.5
	1.74	636	560.5	633.5
	1.741	641	557	634.5
	1.742	638.5	554	633.5
	1.743	642	550	637.5
	1.744	640.5	543	633
	1.745	640	542.5	635
	1.746	642	538	635.5
	1.747	643	534.5	635.5
	1.748	641	529	632.5
	1.749	642	524	636
	1.75	641.5	523.5	633
	1.751	642	517	636
	1.752	643	515	632
	1.753	642.5	510.5	635.5
	1.754	644.5	506.5	636
	1.755	642.5	501.5	632
	1.756	639.5	492	631.5
	1.757	640	492	631.5
	1.758	643	487	635.5
	1.759	643	479.5	635
	1.76	643.5	478	633
	1.761	642.5	472	633.5
	1.762	642	464.5	635.5
	1.763	643.5	462.5	634
	1.764	643.5	458	636
	1.765	641	452	634
	1.766	643	446.5	631.5
	1.767	643	445.5	633
	1.768	640.5	437.5	633
	1.769	641	433	632.5
	1.77	638.5	427.5	633
	1.771	639.5	422.5	636
	1.772	639	420	631.5
	1.773	638	412.5	634
	1.774	640	410	633
	1.775	640	403	637
	1.776	638.5	395.5	635.5
	1.777	641	392	634.5
	1.778	641.5	387	636
	1.779	636	382	633.5
	1.78	641	378	633.5
	1.781	636	370.5	638.5
	1.782	638.5	369	636
	1.783	636	364	636
	1.784	635	358	640
	1.785	634.5	354	636
	1.786	636	350.5	635.5
	1.787	632	344	642
	1.788	631.5	339	636
	1.789	636	337	641
	1.79	634.5	331	637.5
	1.791	629.5	327.5	640.5
	1.792	630	321.5	640
	1.793	632.5	318.5	636
	1.794	629	312	638.5
	1.795	627.5	312	636
	1.796	627.5	307.5	639
	1.797	628	298	638.5
	1.798	627	298.5	640.5
	1.799	628	292	641
	1.8	623	290.5	641.5
	1.801	622.5	284	636
	1.802	622.5	283	636
	1.803	623.5	276.5	641
	1.804	621	277	638
	1.805	620	270.5	636
	1.806	621.5	265.5	637.5
	1.807	620	262	639
	1.808	615.5	261	637.5
	1.809	614.5	259.5	636
	1.81	616.5	252.5	637.5
	1.811	615.5	251	640
	1.812	606.5	248	635.5
	1.813	612	245	635
	1.814	606.5	242.5	634.5
	1.815	606.5	238	635.5
	1.816	604.5	236.5	634.5
	1.817	606.5	232.5	634
	1.818	606	230	634.5
	1.819	602.5	226.5	635.5
	1.82	600	225.5	631.5
	1.821	597	220.5	631
	1.822	593.5	221	629
	1.823	598.5	219	631
	1.824	595	218.5	632
	1.825	593.5	216	628.5
	1.826	594.5	214	625
	1.827	591.5	210.5	622.5
	1.828	589.5	211	629
	1.829	588.5	207	625
	1.83	586	207.5	618.5
	1.831	586.5	205.5	621.5
	1.832	582.5	201	619.5
	1.833	582.5	200.5	621.5
	1.834	578	202.5	616
	1.835	578	198	618
	1.836	576.5	197.5	615.5
	1.837	572	196	613
	1.838	569.5	192.5	615
	1.839	569.5	195	613
	1.84	569	188	612
	1.841	565.5	189	609.5
	1.842	565	188	610.5
	1.843	560	186	610
	1.844	559.5	186	606.5
	1.845	560.5	187	608.5
	1.846	556	185	606.5
	1.847	554	184.5	602.5
	1.848	554	182.5	603
	1.849	547	183.5	605.5
	1.85	547	181	600
	1.851	541	179.5	601
	1.852	539	180.5	593.5
	1.853	540	178	594.5
	1.854	532	180.5	597.5
	1.855	531.5	177.5	594.5
	1.856	527	179	588
	1.857	526.5	177.5	590
	1.858	522	178	588.5
	1.859	517	180.5	586.5
	1.86	513	176.5	583
	1.861	512	177.5	582
	1.862	509	176	576.5
	1.863	505.5	177.5	583
	1.864	502	176	576.5
	1.865	494.5	174	576
	1.866	492.5	177.5	575.5
	1.867	489	177.5	573.5
	1.868	485.5	179.5	566.5
	1.869	483.5	180	567.5
	1.87	478	180.5	565
	1.871	471.5	183	560.5
	1.872	467	183	559
	1.873	462.5	183.5	556.5
	1.874	457.5	184	554
	1.875	451.5	184	552
	1.876	449	184.5	549
	1.877	444	184.5	544
	1.878	440.5	186	542
	1.879	438.5	189	536.5
	1.88	429.5	188.5	534.5
	1.881	430	189.5	532
	1.882	425.5	192.5	532
	1.883	421	191.5	522.5
	1.884	414.5	188	521.5
	1.885	409	193.5	516
	1.886	404	195	511.5
	1.887	400	193	506
	1.888	399	194.5	501.5
	1.889	396	198.5	498
	1.89	392	203.5	493
	1.891	387.5	202	489.5
	1.892	386.5	204	482.5
	1.893	381	203.5	477.5
	1.894	376	206	473.5
	1.895	372	205.5	470.5
	1.896	373.5	210	463.5
	1.897	366	213.5	457
	1.898	362.5	210	455
	1.899	360	214.5	446
	1.9	354.5	215.5	444.5
	1.901	352.5	221.5	437
	1.902	352	219.5	431.5
	1.903	346.5	225	428
	1.904	344.5	227	424
	1.905	339	228.5	417
	1.906	338	232.5	414.5
	1.907	334.5	235.5	408.5
	1.908	332.5	239	400
	1.909	328	242.5	398
	1.91	323	248	395
	1.911	322.5	250	390.5
	1.912	319	255	383.5
	1.913	314.5	255.5	381
	1.914	314.5	258	373
	1.915	309.5	260	371
	1.916	307.5	263.5	369
	1.917	307	269.5	363.5
	1.918	304.5	266.5	358
	1.919	299	272.5	355.5
	1.92	298	273.5	348
	1.921	296	275.5	349.5
	1.922	293	273.5	341.5
	1.923	291.5	276.5	336.5
	1.924	288.5	276.5	333
	1.925	287	281	333
	1.926	279.5	278.5	328
	1.927	278.5	280.5	326.5
	1.928	276.5	279	318.5
	1.929	274.5	280	318.5
	1.93	270.5	279.5	315
	1.931	268	278	309
	1.932	264	280.5	305
	1.933	262	280	304
	1.934	258	279.5	296.5
	1.935	257.5	281.5	296.5
	1.936	256.5	282.5	292.5
	1.937	252.5	284	287
	1.938	251.5	283.5	285.5
	1.939	251	289	279.5
	1.94	244	289	282
	1.941	242.5	288.5	277
	1.942	243	294	273.5
	1.943	236	295	271
	1.944	236	300.5	271
	1.945	234.5	302.5	263
	1.946	230	306	261.5
	1.947	231	312.5	261.5
	1.948	225	318.5	255
	1.949	222	322	252
	1.95	222	328	246.5
	1.951	218.5	337.5	245.5
	1.952	216.5	340	244.5
	1.953	217	345.5	242.5
	1.954	216.5	353	240.5
	1.955	211	355.5	236
	1.956	206.5	363	233.5
	1.957	210	375.5	231
	1.958	205	375.5	227
	1.959	206.5	378.5	230
	1.96	203	388	220
	1.961	202.5	392	219
	1.962	198.5	399	216
	1.963	197.5	404	217.5
	1.964	199	410	212
	1.965	196.5	416	212
	1.966	194.5	419.5	210.5
	1.967	194	426	206
	1.968	193	428.5	205
	1.969	191	434	203
	1.97	193	435.5	203
	1.971	195.5	440	203
	1.972	192	444	199.5
	1.973	191.5	444.5	196
	1.974	190.5	451	199
	1.975	191.5	450	194.5
	1.976	191	451.5	191.5
	1.977	192	460.5	193.5
	1.978	189	463	187
	1.979	190	465	187.5
	1.98	190	467.5	191
	1.981	191.5	470	191.5
	1.982	192	475.5	188
	1.983	191.5	474	186.5
	1.984	191.5	475.5	186
	1.985	194	479.5	183
	1.986	194	483.5	184.5
	1.987	192.5	484	183.5
	1.988	196.5	485.5	184.5
	1.989	195.5	489.5	185.5
	1.99	197.5	490.5	183.5
	1.991	196	494	183
	1.992	201	495.5	182.5
	1.993	199	500	179
[truncated: 6,006 more rows]

## Sheet: J
DataTypeVer2.0	Time	Fz	Fz	Fz
NumberOfData		8000	8000	8000
PreTriggerData		0	0	0
SamplingTime[ms]		1	1	1
DataLabel		A1:CMJ	A2:CMJ	A3:CMJ
DataUnit	sec	N	N	N
	0	715	723	703
	0.001	719.5	718.5	700.5
	0.002	718.5	718	702
	0.003	720	718	702.5
	0.004	718.5	722	700
	0.005	720	722.5	697.5
	0.006	720	720.5	700
	0.007	716.5	723	702.5
	0.008	718.5	718.5	700.5
	0.009	721.5	718	698.5
	0.01	717	716.5	699.5
	0.011	718.5	722.5	699.5
	0.012	717	718.5	697.5
	0.013	718	722	698.5
	0.014	722	723	697.5
	0.015	720.5	719.5	698
	0.016	718.5	722	699.5
	0.017	718.5	723	696.5
	0.018	718.5	718.5	696.5
	0.019	722.5	723	698.5
	0.02	723	723.5	697.5
	0.021	722.5	724	697
	0.022	721	724	695
	0.023	716.5	722	695.5
	0.024	718	727.5	697
	0.025	723	724	696.5
	0.026	718	723	694.5
	0.027	721	726.5	694
	0.028	719.5	723.5	694.5
	0.029	722.5	726	693.5
	0.03	723	726	693.5
	0.031	725	726	692.5
	0.032	723.5	726	692.5
	0.033	721	727.5	694
	0.034	725	725	694
	0.035	723	721.5	691
	0.036	726	729.5	696
	0.037	724.5	726	693
	0.038	725	724.5	694.5
	0.039	721.5	725.5	697.5
	0.04	721	724.5	696.5
	0.041	724.5	730	697
	0.042	724.5	729	693.5
	0.043	722	729	697.5
	0.044	723.5	729	695
	0.045	724	729.5	694
	0.046	725	726	696.5
	0.047	721.5	728	693.5
	0.048	722.5	730	694
	0.049	724	731.5	698.5
	0.05	723.5	729	697.5
	0.051	725	728	700
	0.052	722	728	698
	0.053	724.5	728.5	698
	0.054	725	729.5	698
	0.055	723.5	729.5	696.5
[truncated: 7,944 more rows]
